# Supplementary material for: aCPSF1 cooperates with terminator U-tract to dictate archaeal transcription termination efficacy
Source: eLife. 2021 Dec 29;10:e70464. doi: 10.7554/eLife.70464 (PMC8716108; doi:10.7554/eLife.70464)
Supplement: Figure 1—source data 1. [file elife-70464-fig1-data1.xlsx]

## Sheet: Figure1B
Gene	Transcription Termination Efficiencies
	1-[+1]/[-1]	1-[+2]/[-2]
MMP0001	0.176465	0.181813
MMP0002	0.123076	0.218637
MMP0003	0.204544	0.257776
MMP0006	0.335402	0.536943
MMP0007	0.375884	0.509088
MMP0008	0.099009	0.119999
MMP0010	0.814785	0.785686
MMP0013	0.399997	0.485071
MMP0014	0.099009	0.128712
MMP0017	0.344816	0.499986
MMP0020	0.405969	0.804069
MMP0021	0.0985899	0.0985899
MMP0022	0.179773	0.244678
MMP0024	0.0938771	0.158536
MMP0025	0.30786	0.532908
MMP0027	0.714252	0.75997
MMP0028	0.0967735	0.0974021
MMP0029	0.394902	0.641301
MMP0030	0.458324	0.537027
MMP0031	0.399987	0.419341
MMP0033	0.153845	0.144443
MMP0034	0.489358	0.707788
MMP0036	0.688513	0.818171
MMP0037	0.0937481	0.134327
MMP0038	0.191998	0.396944
MMP0039	0.333321	0.333321
MMP0040	0.637672	0.632344
MMP0041	0.291654	0.319987
MMP0042	0.282605	0.322577
MMP0044	0.24324	0.256753
MMP0045	0.427651	0.587529
MMP0046	0.310342	0.457361
MMP0050	0.510199	0.678893
MMP0051	0.518866	0.620595
MMP0053	0.249997	0.297869
MMP0056	0.160492	0.28235
MMP0057	0.312498	0.582414
MMP0058	0.465978	0.565824
MMP0059	0.207006	0.23867
MMP0060	0.636708	0.702265
MMP0062	0.290849	0.50997
MMP0063	0.174603	0.300904
MMP0065	0.478101	0.820844
MMP0066	0.515956	0.618924
MMP0068	0.666639	0.827558
MMP0069	0.719047	0.799395
MMP0070	0.361695	0.446799
MMP0071	0.239433	0.257139
MMP0072	0.451598	0.558807
MMP0073	0.270095	0.470768
MMP0076	0.533985	0.664733
MMP0077	0.179999	0.386789
MMP0078	0.374992	0.458324
MMP0079	0.307188	0.538009
MMP0080	0.274504	0.249995
MMP0083	0.590098	0.695254
MMP0086	0.717376	0.739114
MMP0087	0.381439	0.495408
MMP0089	0.272719	0.272719
MMP0091	0.251322	0.394936
MMP0092	0.214506	0.260354
MMP0093	0.404411	0.620802
MMP0094	0.192305	0.227845
MMP0095	0.270267	0.456784
MMP0096	0.155842	0.202529
MMP0098	0.655195	0.795532
MMP0100	0.466213	0.677774
MMP0102	0.583309	0.769201
MMP0103	0.339499	-1.0773
MMP0104	0.370357	0.533316
MMP0105	0.434387	0.569851
MMP0107	0.466636	0.647021
MMP0108	0.526288	0.736803
MMP0110	0.24999	0.407392
MMP0112	0.583309	0.565193
MMP0115	0.296293	0.422217
MMP0116	0.166665	0.174601
MMP0123	0.612497	0.692881
MMP0125	0.4909	0.553561
MMP0127	0.454117	0.835989
MMP0128	0.449977	0.428551
MMP0130	0.559989	0.673064
MMP0132	0.247023	0.406976
MMP0133	0.511311	0.613332
MMP0134	0.21923	0.417265
MMP0135	0.159573	0.159573
MMP0136	0.460721	0.781817
MMP0137	0.456132	0.536224
MMP0139	0.617629	0.742836
MMP0141	0.669805	0.746148
MMP0144	0.548369	0.666648
MMP0148	0.365382	0.604648
MMP0151	0.362239	0.592045
MMP0152	0.537305	0.611103
MMP0153	0.515136	0.666651
MMP0155	0.285713	0.438596
MMP0156	0.123076	0.128787
MMP0157	0.0932197	0.0769228
MMP0158	0.422641	0.666982
MMP0159	0.122448	0.133332
MMP0162	0.428568	0.429748
MMP0163	0.382636	0.545698
MMP0164	0.271014	0.403819
MMP0170	0.193542	0.249992
MMP0173	0.153844	0.166665
MMP0174	0.314277	0.449989
MMP0176	0.361215	0.425924
MMP0178	0.999857	0.999857
MMP0180	0.363633	0.504757
MMP0181	0.544999	0.687499
MMP0182	0.474743	0.616817
MMP0183	0.339284	0.425618
MMP0186	0.170453	0.277774
MMP0187	0.146664	0.240961
MMP0188	0.314	0.327772
MMP0189	0.651678	0.842687
MMP0190	0.214278	0.413779
MMP0192	0.578917	0.730741
MMP0194	0.235022	0.319999
MMP0204	0.661963	0.809516
MMP0205	0.424457	0.499996
MMP0209	0.258056	0.424229
MMP0210	0.275852	0.44826
MMP0212	0.512075	0.671293
MMP0214	0.359986	0.359986
MMP0215	0.424995	0.506166
MMP0219	0.472216	0.737366
MMP0220	0.482742	0.606042
MMP0221	0.695941	0.813248
MMP0222	0.31249	0.333323
MMP0224	0.39597	0.579205
MMP0227	0.339993	0.392149
MMP0228	0.103772	0.160713
MMP0229	0.516662	0.617183
MMP0230	0.4857	0.527763
MMP0233	0.27777	0.351342
MMP0234	0.341344	0.568279
MMP0235	0.619944	0.739556
MMP0237	0.354159	0.520822
MMP0239	0.399973	0.333311
MMP0241	0.284089	0.431692
MMP0245	0.593806	0.790591
MMP0247	0.275852	0.470575
MMP0248	0.254235	0.29268
MMP0249	0.384742	0.679557
MMP0250	0.295998	0.295998
MMP0252	0.411177	0.489681
MMP0254	0.23999	0.279989
MMP0256	0.188775	0.209999
MMP0258	0.380564	0.643009
MMP0259	0.0957436	0.0967735
MMP0260	0.155038	0.167938
MMP0261	0.391811	0.50769
MMP0263	0.531233	0.531233
MMP0264	0.459453	0.691349
MMP0266	0.292676	0.536572
MMP0270	0.346147	0.370364
MMP0274	0.383717	0.494732
MMP0276	0.363625	0.536572
MMP0277	0.448268	0.65624
MMP0278	0.212115	0.212115
MMP0280	0.347617	0.49339
MMP0281	0.124998	0.199997
MMP0282	0.277774	0.450545
MMP0283	0.16216	0.256753
MMP0284	0.18333	0.278684
MMP0285	0.189188	0.202796
MMP0286	0.162158	0.189184
MMP0287	0.388882	0.551715
MMP0289	0.467209	0.58503
MMP0290	0.21192	0.265957
MMP0291	0.288972	0.426055
MMP0292	0.252872	0.314605
MMP0294	0.292681	0.361501
MMP0295	0.499997	0.641973
MMP0297	0.560971	0.702527
MMP0298	0.241312	0.298291
MMP0300	0.24999	0.208325
MMP0301	0.511616	0.673898
MMP0302	0.142608	0.203735
MMP0303	0.203666	0.314847
MMP0309	0.640865	0.771572
MMP0311	0.181813	0.161285
MMP0313	0.510867	0.619466
MMP0317	0.656877	0.740241
MMP0318	0.366547	0.417807
MMP0319	0.36362	0.434764
MMP0321	0.333315	0.333315
MMP0322	0.212388	0.299998
MMP0325	0.570091	0.714857
MMP0326	0.466015	0.610682
MMP0327	0.370366	0.499994
MMP0329	0.333315	0.2941
MMP0330	0.241931	0.378782
MMP0331	0.190473	0.215381
MMP0333	0.245096	0.399997
MMP0335	0.574025	0.640844
MMP0339	0.782163	0.808403
MMP0341	0.890118	0.916728
MMP0343	0.281241	0.447357
MMP0344	0.474902	0.769228
MMP0345	0.461503	0.642811
MMP0346	0.771916	0.880425
MMP0347	0.439982	0.607121
MMP0348	0.569886	0.736357
MMP0349	0.481464	0.766641
MMP0350	0.32257	0.354827
MMP0351	0.687457	0.705841
MMP0353	0.227268	0.439991
MMP0354	0.181813	0.205877
MMP0355	0.285708	0.521728
MMP0359	0.145831	0.230765
MMP0360	0.119998	0.153843
MMP0363	0.218743	0.242417
MMP0366	0.399973	0.466636
MMP0369	0.802186	0.864963
MMP0370	0.441312	0.682537
MMP0372	0.714119	0.865601
MMP0373	0.563533	0.702827
MMP0375	0.126212	0.212961
MMP0382	0.409829	0.575335
MMP0383	0.747356	0.824587
MMP0384	0.577765	0.714273
MMP0385	0.415087	0.436356
MMP0386	0.542808	0.774187
MMP0387	0.287499	0.319837
MMP0388	0.183149	0.221052
MMP0391	0.389472	0.55963
MMP0392	0.777691	0.777691
MMP0393	0.307688	0.459995
MMP0394	0.28571	0.358204
MMP0396	0.260233	0.441526
MMP0397	0.54615	0.708328
MMP0399	0.806426	0.838683
MMP0400	0.532783	0.770365
MMP0401	0.249992	0.32352
MMP0402	0.29687	0.614277
MMP0405	0.445292	0.600466
MMP0406	0.0921982	0.118881
MMP0407	0.271708	0.568061
MMP0408	0.27777	0.461527
MMP0409	0.210521	0.249994
MMP0411	0.359986	0.384601
MMP0413	0.446799	0.499991
MMP0414	0.596023	0.666663
MMP0415	0.162787	0.266661
MMP0418	0.440671	0.564507
MMP0419	0.455077	0.790959
MMP0420	0.509082	0.509082
MMP0421	0.208329	0.244893
MMP0422	0.390619	0.506323
MMP0423	0.224994	0.363628
MMP0424	0.315781	0.421042
MMP0426	0.127657	0.145831
MMP0427	0.584408	0.719619
MMP0428	0.465747	0.599992
MMP0429	0.451703	0.563105
MMP0430	0.30508	0.434776
MMP0431	0.397586	0.613629
MMP0433	0.115043	0.232756
MMP0434	0.504061	0.639093
MMP0439	0.134144	0.144577
MMP0440	0.33636	0.47321
MMP0441	0.503352	0.578613
MMP0442	0.203388	0.220993
MMP0444	0.396226	0.539311
MMP0447	0.461537	0.729673
MMP0452	0.405058	0.628565
MMP0455	0.199995	0.299992
MMP0457	0.299719	0.667424
MMP0458	0.477968	0.500599
MMP0459	0.709863	0.879278
MMP0464	0.35292	0.41174
MMP0476	0.36363	0.428564
MMP0480	0.160427	0.314431
MMP0482	0.228066	0.413786
MMP0487	0.571388	0.571388
MMP0489	0.477605	0.630128
MMP0490	0.393928	0.454532
MMP0493	0.275852	0.45713
MMP0496	0.333321	0.551705
MMP0498	0.387495	0.659993
MMP0500	0.561636	0.691482
MMP0502	0.189184	0.394727
MMP0511	0.837815	0.90474
MMP0514	0.47824	0.839966
MMP0516	0.252744	0.326312
MMP0519	0.666611	0.833264
MMP0524	0.765298	0.871552
MMP0526	0.122447	0.122447
MMP0528	0.424834	0.539264
MMP0529	0.550171	0.804485
MMP0531	0.195117	0.319142
MMP0532	0.405394	0.571417
MMP0533	0.473672	0.595732
MMP0534	0.271182	0.327863
MMP0536	0.318168	0.36362
MMP0538	0.39285	0.636354
MMP0539	0.294962	0.496685
MMP0540	0.327863	0.459009
MMP0541	0.291661	0.319993
MMP0542	0.562493	0.537493
MMP0543	0.551705	0.566648
MMP0544	0.571388	0.53842
MMP0545	0.344824	0.642099
MMP0546	0.254897	0.274504
MMP0549	0.243586	0.30952
MMP0550	0.640283	0.798812
MMP0553	0.556812	0.690715
MMP0555	0.195117	0.274993
MMP0559	0.551109	0.734437
MMP0561	0.227269	0.32432
MMP0562	0.291654	0.464269
MMP0563	0.866638	0.888864
MMP0566	0.450978	0.682631
MMP0572	0.510094	0.586877
MMP0573	0.156248	0.227269
MMP0574	0.200622	0.271787
MMP0575	0.433628	0.726303
MMP0576	0.208333	-0.324528
MMP0577	0.381578	0.376236
MMP0578	0.256095	0.277105
MMP0581	0.499975	0.681787
MMP0584	0.549288	0.707308
MMP0585	0.379775	0.616632
MMP0589	0.105262	0.122805
MMP0590	0.31034	0.464782
MMP0591	0.525924	0.73684
MMP0592	0.249992	0.378368
MMP0596	0.253161	0.256407
MMP0597	0.349055	0.510202
MMP0598	0.346141	0.428556
MMP0600	0.499993	0.574993
MMP0601	0.534145	0.708501
MMP0603	0.136362	0.136362
MMP0604	0.544072	0.67862
MMP0605	0.331057	0.598744
MMP0606	0.236362	0.295179
MMP0608	0.249995	0.411757
MMP0610	0.399993	0.409829
MMP0611	0.133332	0.164705
MMP0613	0.456132	0.524582
MMP0614	0.436876	0.711063
MMP0615	0.4106	0.755503
MMP0617	0.25925	0.285704
MMP0620	0.703998	0.843009
MMP0624	0.353266	0.520547
MMP0625	0.620678	0.803534
MMP0626	0.140495	0.17073
MMP0627	0.374997	0.458643
MMP0628	0.39285	0.622941
MMP0629	0.344123	0.463082
MMP0630	0.423071	0.481475
MMP0631	0.259737	0.433329
MMP0632	0.384601	0.607121
MMP0633	0.459714	0.60475
MMP0636	0.292133	0.52747
MMP0637	0.348829	0.490557
MMP0638	0.12658	0.152939
MMP0639	0.32981	0.462717
MMP0642	0.222216	0.378368
MMP0643	0.298341	0.407581
MMP0644	0.243748	0.309089
MMP0646	0.226561	0.299998
MMP0647	0.295077	0.245898
MMP0651	0.4322	0.537875
MMP0654	0.652645	0.838672
MMP0655	0.749973	0.799973
MMP0656	0.125402	0.181517
MMP0657	0.285123	0.34424
MMP0658	0.399995	0.624993
MMP0660	0.714235	0.714235
MMP0664	0.599988	0.693537
MMP0665	0.0934573	0.146788
MMP0666	0.36548	0.442306
MMP0667	0.559993	0.559993
MMP0668	0.168537	0.149423
MMP0669	0.55	0.776011
MMP0670	0.390619	0.390619
MMP0671	0.679973	0.793076
MMP0672	0.379297	0.44826
MMP0674	0.410246	0.476179
MMP0676	0.447357	0.794851
MMP0679	0.209875	0.305387
MMP0680	0.599995	0.727267
MMP0681	0.33332	0.416649
MMP0682	0.26923	0.450591
MMP0683	0.136985	0.130433
MMP0684	0.276816	0.48148
MMP0685	0.0940166	0.0775861
MMP0686	0.651158	0.784426
MMP0687	0.317072	0.484176
MMP0689	0.834432	0.874995
MMP0692	0.700916	0.815898
MMP0693	0.309085	0.321423
MMP0694	0.189943	0.343913
MMP0695	0.725675	0.818401
MMP0696	0.374984	0.499979
MMP0698	0.344825	0.644623
MMP0701	0.451598	0.527763
MMP0702	0.439991	0.49999
MMP0704	0.374647	0.503936
MMP0706	0.374991	0.488361
MMP0708	0.505045	0.691582
MMP0709	0.553313	0.754716
MMP0712	0.394727	0.574986
MMP0714	0.324316	0.342096
MMP0716	0.42553	0.648777
MMP0718	0.391436	0.509137
MMP0719	0.615633	0.726561
MMP0720	0.527263	0.698402
MMP0723	0.396819	0.557135
MMP0727	0.449989	0.549986
MMP0729	0.466636	0.499969
MMP0734	0.352938	0.549614
MMP0735	0.333331	0.565213
MMP0737	0.342104	0.552687
MMP0738	0.113043	0.139738
MMP0739	0.394727	0.424989
MMP0756	0.272719	0.424989
MMP0760	0.725476	0.866652
MMP0761	0.297289	0.432421
MMP0770	0.4074	0.481472
MMP0785	0.249993	0.297289
MMP0788	0.499981	0.59998
MMP0790	0.79992	0.857082
MMP0792	0.545405	0.545405
MMP0798	0.85702	0.91659
MMP0799	0.681787	0.818145
MMP0809	0.661006	0.769221
MMP0811	0.181813	0.361101
MMP0812	0.735272	0.897413
MMP0814	0.342096	0.431808
MMP0816	0.538448	0.666652
MMP0826	0.198274	0.291337
MMP0827	0.586187	0.781226
MMP0839	0.133332	0.184208
MMP0841	0.624961	0.705841
MMP0843	0.428559	0.599983
MMP0844	0.388878	0.567552
MMP0846	0.580626	0.62498
MMP0850	0.187494	0.187494
MMP0851	0.210523	0.327581
MMP0855	0.39998	0.499979
MMP0859	0.297289	0.594579
MMP0860	0.344816	0.399987
MMP0862	0.365845	0.489351
MMP0865	0.435892	0.647051
MMP0866	0.464953	0.678082
MMP0867	0.305676	0.599301
MMP0870	0.857082	0.882301
MMP0872	0.180849	0.284311
MMP0874	0.299106	0.424241
MMP0875	0.219507	0.340418
MMP0876	0.346147	0.396219
MMP0878	0.517108	0.617975
MMP0879	0.380433	0.64583
MMP0881	0.545442	0.65216
MMP0883	0.338026	0.442305
MMP0886	0.116665	0.229504
MMP0887	0.589275	0.698621
MMP0888	0.560296	0.73604
MMP0889	0.259256	0.259256
MMP0890	0.65624	0.838223
MMP0891	0.159997	0.277773
MMP0894	0.213115	0.305803
MMP0895	0.233326	0.266658
MMP0897	0.499993	0.644225
MMP0898	0.377355	0.67796
MMP0901	0.376806	0.43055
MMP0902	0.506166	0.579539
MMP0904	0.126666	0.179999
MMP0908	0.571422	0.627653
MMP0909	0.144066	0.224998
MMP0910	0.169488	0.348479
MMP0911	0.477605	0.589033
MMP0912	0.805533	0.874982
MMP0915	0.17964	0.178571
MMP0916	0.61707	0.770491
MMP0917	0.142156	0.213269
MMP0919	0.517232	0.787867
MMP0920	0.47706	0.591662
MMP0923	0.431027	0.613325
MMP0929	0.249995	0.346147
MMP0931	0.702373	0.855546
MMP0933	0.545405	0.499958
MMP0934	0.382342	0.382342
MMP0937	0.174755	0.349997
MMP0938	0.242103	0.336731
MMP0939	0.30508	0.423721
MMP0942	0.333317	0.380934
MMP0946	0.218542	0.340908
MMP0947	0.32812	0.421868
MMP0948	0.465516	0.687896
MMP0949	0.46268	0.46268
MMP0952	0.250617	0.289346
MMP0954	0.39998	0.454525
MMP0955	0.230767	0.388233
MMP0956	0.359996	0.483603
MMP0959	0.521716	0.65515
MMP0961	0.649989	0.731332
MMP0963	0.705462	0.807173
MMP0964	0.136929	0.156378
MMP0965	0.284955	0.469387
MMP0966	0.136985	0.124998
MMP0967	0.370357	0.392843
MMP0969	0.351142	0.699995
MMP0971	0.280701	0.449578
MMP0972	0.230767	0.366409
MMP0975	0.787855	0.860445
MMP0978	0.164061	0.170542
MMP0979	0.434776	0.472967
MMP0985	0.249991	0.29999
MMP0986	0.370357	0.370357
MMP0989	0.401957	0.553393
MMP0992	0.444354	0.511139
MMP0997	0.433319	0.59998
MMP0998	0.438771	0.719993
MMP0999	0.302319	0.377769
MMP1001	0.142854	0.241375
MMP1002	0.177774	0.177774
MMP1009	0.273502	0.279659
MMP1011	0.484841	0.643827
MMP1012	0.394727	0.684193
MMP1013	0.511105	0.687493
MMP1014	0.559628	0.605258
MMP1015	0.241934	0.301526
MMP1016	0.321126	0.493112
MMP1017	0.211999	0.278625
MMP1018	0.211109	0.475243
MMP1019	0.409072	0.551705
MMP1021	0.481007	0.646546
MMP1024	0.499969	0.588201
MMP1026	0.230766	0.318177
MMP1029	0.133332	0.287034
MMP1030	0.482266	0.526312
MMP1031	0.463708	0.540144
MMP1032	0.381439	0.57281
MMP1033	0.379992	0.448971
MMP1036	0.590515	0.911013
MMP1037	0.374977	0.470561
MMP1038	0.158878	0.154205
MMP1039	0.122221	0.133332
MMP1040	0.096153	0.173075
MMP1041	0.344261	0.370368
MMP1043	0.324996	0.399995
MMP1044	0.411761	0.537032
MMP1045	0.117646	0.183906
MMP1046	0.140843	0.138887
MMP1047	0.498692	0.879331
MMP1048	0.153843	0.153843
MMP1049	0.265415	0.366924
MMP1050	0.157446	0.20502
MMP1053	0.550959	0.773532
MMP1056	0.199997	0.265057
MMP1057	0.101693	0.147539
MMP1060	0.470561	0.619018
MMP1062	0.216211	0.317065
MMP1063	0.295774	0.579063
MMP1064	0.491524	0.647057
MMP1066	0.241931	0.357138
MMP1067	0.301881	0.393436
MMP1068	0.24999	0.533316
MMP1069	0.617008	0.73912
MMP1070	0.583321	0.677955
MMP1071	0.708319	0.735835
MMP1074	0.197182	0.326665
MMP1075	0.212765	0.239724
MMP1076	0.285701	0.318168
MMP1077	0.310334	0.366654
MMP1080	0.259254	0.327581
MMP1082	0.433319	0.483855
MMP1083	0.209297	0.209297
MMP1084	0.210523	0.29687
MMP1085	0.333315	0.333315
MMP1088	0.105262	0.163932
MMP1090	0.377769	0.78332
MMP1091	0.629618	0.718739
MMP1092	0.212115	0.342847
MMP1094	0.391044	0.466274
MMP1095	0.576261	0.806439
MMP1100	0.535353	0.759767
MMP1101	0.346662	0.424995
MMP1103	0.424989	0.477262
MMP1104	0.47999	0.599988
MMP1106	0.19786	0.372447
MMP1107	0.12162	0.158939
MMP1109	0.296285	0.321417
MMP1110	0.627892	0.651148
MMP1113	0.431813	0.666659
MMP1116	0.725385	0.824624
MMP1117	0.110599	0.171945
MMP1118	0.317565	0.451217
MMP1119	0.296285	0.333321
MMP1120	0.301721	0.624995
MMP1121	0.0999983	0.101447
MMP1122	0.660702	0.734364
MMP1124	0.354827	0.611094
MMP1126	0.585352	0.761887
MMP1127	0.241931	0.412692
MMP1128	0.361695	0.374992
MMP1129	0.216215	0.324673
MMP1131	0.370367	0.648432
MMP1132	0.333315	0.333315
MMP1133	0.258056	0.516112
MMP1134	0.568169	0.653834
MMP1136	0.452826	0.599996
MMP1137	0.213331	0.19718
MMP1139	0.710835	0.876182
MMP1140	0.108695	0.206184
MMP1142	0.181815	0.163633
MMP1143	0.47999	0.619038
MMP1146	0.206225	0.315216
MMP1147	0.36626	0.457873
MMP1148	0.0934573	0.0654197
MMP1149	0.564144	0.819181
MMP1152	0.586659	0.687491
MMP1153	0.390241	0.559207
MMP1154	0.307681	0.307681
MMP1155	0.254233	0.293098
MMP1156	0.891556	0.891556
MMP1158	0.906443	0.906443
MMP1160	0.745561	0.862294
MMP1161	0.749517	0.846542
MMP1163	0.439558	0.574876
MMP1164	0.679973	0.679973
MMP1167	0.574706	0.579539
MMP1168	0.190472	0.190472
MMP1169	0.182924	0.303367
MMP1172	0.299985	0.349982
MMP1174	0.687925	0.849386
MMP1175	0.265301	0.566027
MMP1177	0.342028	0.403314
MMP1178	0.633051	0.812774
MMP1180	0.59997	0.649968
MMP1181	0.377769	0.413035
MMP1183	0.494417	0.682137
MMP1186	0.517798	0.671777
MMP1188	0.545696	0.783066
MMP1189	0.336204	0.516945
MMP1190	0.355261	0.514849
MMP1191	0.450797	0.668741
MMP1194	0.83331	0.897413
MMP1196	0.361695	0.458324
MMP1197	0.53842	0.53842
MMP1198	0.333329	0.449433
MMP1199	0.489786	0.627108
MMP1200	0.349461	0.533331
MMP1201	0.466651	0.588218
MMP1204	0.358965	0.523797
MMP1206	0.335687	0.473
MMP1207	0.381834	0.530526
MMP1208	0.544735	0.633176
MMP1209	0.292676	0.479157
MMP1210	0.26415	0.321917
MMP1211	0.240738	0.290906
MMP1212	0.480685	0.472101
MMP1213	0.382002	0.674319
MMP1215	0.499981	0.638871
MMP1216	0.230763	0.39999
MMP1217	0.24561	0.433326
MMP1220	0.249995	0.352934
MMP1221	0.499982	0.580626
MMP1222	0.399999	0.520421
MMP1224	0.170157	0.296482
MMP1225	0.296285	0.32257
MMP1229	0.636344	0.743571
MMP1230	0.416649	0.629606
MMP1231	0.396545	0.499992
MMP1233	0.216211	0.270263
MMP1235	0.260858	0.374984
MMP1237	0.714273	0.791033
MMP1241	0.242423	0.328569
MMP1242	0.126506	0.13253
MMP1245	0.260858	0.18181
MMP1246	0.636335	0.590882
MMP1247	0.0999983	0.112674
MMP1248	0.263151	0.549986
MMP1249	0.72455	0.827319
MMP1251	0.303021	0.303021
MMP1252	0.386471	0.453331
MMP1255	0.318626	0.582157
MMP1257	0.27777	0.342096
MMP1259	0.439186	0.544376
MMP1260	0.496991	0.724876
MMP1261	0.331393	0.396737
MMP1265	0.374984	0.677398
MMP1270	0.558815	0.589033
MMP1271	0.234847	0.415092
MMP1273	0.466651	0.433319
MMP1274	0.529603	0.753621
MMP1276	0.1746	0.279408
MMP1277	0.199996	0.285709
MMP1280	0.264935	0.386307
MMP1281	0.15306	0.272725
MMP1282	0.253517	0.32432
MMP1284	0.374984	0.461521
MMP1286	0.288882	0.266661
MMP1287	0.415378	0.671224
MMP1289	0.485132	0.559721
MMP1290	0.199998	0.189472
MMP1292	0.347811	0.47824
MMP1293	0.304335	0.238084
MMP1294	0.318168	0.461521
MMP1295	0.29999	0.424229
MMP1297	0.779943	0.841154
MMP1298	0.384144	0.417644
MMP1299	0.345998	0.434147
MMP1300	0.131579	0.133986
MMP1301	0.299547	0.452623
MMP1302	0.50673	0.64652
MMP1303	0.175435	0.249996
MMP1306	0.303796	0.406591
MMP1308	0.569973	0.744768
MMP1310	0.405402	0.504128
MMP1314	0.480387	0.574995
MMP1315	0.348829	0.468075
MMP1318	0.319996	0.478256
MMP1319	0.353448	0.359724
MMP1321	0.107438	0.155999
MMP1322	0.41739	0.461536
MMP1324	0.426226	0.457361
MMP1325	0.642581	0.800319
MMP1326	0.596705	0.0123964
MMP1327	0.692855	0.753941
MMP1328	0.13492	0.148436
MMP1329	0.218	0.277566
MMP1330	0.103718	0.141777
MMP1331	0.421031	0.476168
MMP1332	0.476168	0.636335
MMP1333	0.36065	0.596765
MMP1334	0.150288	0.247421
MMP1337	0.452826	0.59848
MMP1338	0.477262	0.531904
MMP1343	0.304335	0.416649
MMP1345	0.208329	0.254897
MMP1347	0.543614	0.705983
MMP1348	0.285701	0.285701
MMP1349	0.396545	0.406773
MMP1352	0.145833	0.188775
MMP1356	0.186664	0.333329
MMP1358	0.606377	0.792445
MMP1360	0.22222	0.309732
MMP1361	0.205877	0.205877
MMP1362	0.25333	0.316452
MMP1363	0.152171	0.173909
MMP1364	0.556618	0.745041
MMP1365	0.225223	0.243241
MMP1366	0.103092	0.104166
MMP1367	0.0972212	0.109588
MMP1368	0.301203	0.440412
MMP1369	0.76419	0.766374
MMP1370	0.613162	0.718636
MMP1371	0.451459	0.669821
MMP1373	0.436515	0.608503
MMP1375	0.706416	0.788727
MMP1376	0.674403	0.833316
MMP1377	0.307684	0.512807
MMP1378	0.277173	0.445024
MMP1379	0.312137	0.421346
MMP1380	0.413779	0.413779
MMP1381	0.611649	0.725371
MMP1382	0.301366	0.399995
MMP1383	0.411761	0.431997
MMP1384	0.44444	0.449996
MMP1385	0.406128	0.546964
MMP1387	0.234038	0.319993
MMP1388	0.319987	0.307681
MMP1391	0.381574	0.557889
MMP1394	0.499979	0.685695
MMP1396	0.472219	0.714282
MMP1399	0.19512	0.22727
MMP1401	0.418604	0.51923
MMP1402	0.104838	0.159998
MMP1403	0.123966	0.139343
MMP1405	0.212121	0.246073
MMP1406	0.13285	0.160332
MMP1407	0.164627	0.21069
MMP1408	0.227722	0.247572
MMP1409	0.242717	0.261903
MMP1410	0.255143	0.295999
MMP1411	0.110293	0.143884
MMP1412	0.71383	0.713606
MMP1413	0.556665	0.553689
MMP1414	0.107692	0.0984843
MMP1417	0.13793	0.12676
MMP1418	0.165288	0.17213
MMP1419	0.646223	0.646223
MMP1420	0.141666	0.140495
MMP1421	0.708467	0.808611
MMP1422	0.461133	0.655796
MMP1424	0.547903	0.694213
MMP1425	0.24999	0.24999
MMP1427	0.249998	0.0412364
MMP1428	0.245378	0.372857
MMP1429	0.282149	0.46126
MMP1432	0.662549	0.812731
MMP1433	0.641186	0.769393
MMP1435	0.25783	0.305239
MMP1436	0.33663	0.428568
MMP1437	0.541279	0.671424
MMP1438	0.440363	0.814152
MMP1439	0.430374	0.488366
MMP1441	0.411426	0.536839
MMP1442	0.550801	0.702018
MMP1445	0.325579	0.405403
MMP1447	0.130432	0.0652161
MMP1452	0.301881	0.301881
MMP1453	0.249994	0.272721
MMP1455	0.162787	0.162787
MMP1456	0.233326	0.199994
MMP1461	0.206889	0.241371
MMP1467	0.597764	0.657287
MMP1469	0.287231	0.509086
MMP1470	0.611985	0.712705
MMP1472	0.233326	0.411753
MMP1474	0.14754	0.249999
MMP1475	0.256196	0.354328
MMP1479	0.275857	0.377043
MMP1480	0.551279	0.804729
MMP1481	0.355258	0.362495
MMP1482	0.122605	0.169741
MMP1483	0.305547	0.512183
MMP1485	0.0965907	0.168477
MMP1486	0.381501	0.502791
MMP1488	0.147539	0.161288
MMP1489	0.32911	0.538456
MMP1491	0.236359	0.373129
MMP1493	0.502486	0.604214
MMP1494	0.349393	0.399995
MMP1495	0.142855	0.156248
MMP1498	0.370369	0.424777
MMP1499	0.164556	0.254657
MMP1500	0.573704	0.799999
MMP1502	0.230769	0.334385
MMP1504	0.279063	0.434773
MMP1505	0.222219	0.222219
MMP1506	0.187496	0.187496
MMP1508	0.148646	0.173331
MMP1509	0.515355	0.654748
MMP1510	0.409908	0.613041
MMP1511	0.691687	0.853895
MMP1512	0.499979	0.666642
MMP1515	0.67274	0.771276
MMP1516	0.381811	0.63792
MMP1517	0.538448	0.560962
MMP1518	0.199996	0.409829
MMP1520	0.237499	0.391564
MMP1523	0.512268	0.759418
MMP1525	0.41428	0.636355
MMP1527	0.540533	0.635287
MMP1530	0.257139	0.337833
MMP1532	0.249992	0.472209
MMP1534	0.540423	0.765796
MMP1537	0.999933	0.0624959
MMP1538	0.80785	0.905659
MMP1540	0.134327	0.167882
MMP1541	0.611838	0.738885
MMP1543	0.0937498	0.123456
MMP1546	0.440366	0.442558
MMP1547	0.529894	0.621334
MMP1550	0.376883	0.679484
MMP1551	0.454542	0.649119
MMP1553	0.403407	0.451084
MMP1554	0.615369	0.681803
MMP1555	0.147367	0.183671
MMP1558	0.187968	0.189393
MMP1559	0.34246	0.687311
MMP1561	0.164177	0.194027
MMP1562	0.383231	0.383231
MMP1565	0.141508	0.158877
MMP1566	0.140623	0.171872
MMP1567	0.782434	0.852702
MMP1568	0.393546	0.508284
MMP1573	0.41174	0.583309
MMP1576	0.100204	0.142
MMP1577	0.884952	0.958155
MMP1579	0.587322	0.856641
MMP1582	0.258056	0.258056
MMP1583	0.662097	0.660547
MMP1584	0.729476	0.887542
MMP1586	0.573056	0.770731
MMP1588	0.8409	0.895154
MMP1589	0.427416	0.718744
MMP1590	0.294112	0.333327
MMP1592	0.535705	0.568956
MMP1594	0.35292	0.388867
MMP1595	0.499975	0.499975
MMP1599	0.363632	0.512189
MMP1602	0.346141	0.370357
MMP1604	0.423524	0.648643
MMP1608	0.604429	0.739897
MMP1609	0.542119	0.853055
MMP1610	0.148809	0.188234
MMP1611	0.137614	0.198196
MMP1613	0.233008	0.327583
MMP1615	0.344593	0.495625
MMP1617	0.461503	0.499964
MMP1619	0.112359	0.258062
MMP1621	0.508377	0.672039
MMP1622	0.272715	0.272715
MMP1626	0.187494	0.242417
MMP1627	0.270263	0.297289
MMP1628	0.265301	0.299994
MMP1629	0.406449	0.360757
MMP1630	0.285711	0.410522
MMP1632	0.452376	0.563824
MMP1633	0.495322	0.627267
MMP1635	0.649249	0.746909
MMP1636	0.127657	0.145831
MMP1637	0.162158	0.162158
MMP1639	0.299994	0.259995
MMP1640	0.322265	0.374764
MMP1642	0.129411	0.168537
MMP1643	0.254108	0.264411
MMP1644	0.573423	0.692767
MMP1646	0.165016	0.281345
MMP1647	0.368616	0.428186
MMP1648	0.254233	0.347821
MMP1652	0.592571	0.742836
MMP1653	0.545405	0.583285
MMP1655	0.244439	0.333326
MMP1656	0.238089	0.346932
MMP1658	0.41342	0.752855
MMP1659	0.202379	0.317643
MMP1661	0.188523	0.359997
MMP1662	0.190474	0.274334
MMP1664	0.458314	0.479981
MMP1671	0.299985	0.624974
MMP1678	0.112674	0.169011
MMP1679	0.201679	0.366409
MMP1681	0.220929	0.408837
MMP1683	0.385317	0.394492
MMP1684	0.112901	0.0937481
MMP1685	0.199649	0.205217
MMP1687	0.194439	0.166662
MMP1688	0.324996	0.337658
MMP1689	0.288886	0.365587
MMP1691	0.569404	0.747197
MMP1692	0.48117	0.612793
MMP1693	0.574467	0.701009
MMP1694	0.612696	0.610758
MMP1695	0.173911	0.210083
MMP1696	0.138728	0.189943
MMP1697	0.923242	0.923352
MMP1698	0.166197	0.163841
MMP1699	0.241371	0.241371
MMP1700	0.416664	0.574876
MMP1702	0.906623	0.940531
MMP1703	0.113879	0.120141
MMP1704	0.138527	0.297958
MMP1707	0.330272	0.324071
MMP1708	0.374079	0.611111
MMP1710	0.191082	0.172077
MMP1711	0.142855	0.202245
MMP1712	0.243237	0.333325
MMP1714	0.430828	0.689074
MMP1717	0.282602	0.584895
MMP1720	0.179482	0.224994
MMP1721	0.754307	0.861311
MMP1722	0.096296	0.236024
RNA_10	0.222214	0.333321
RNA_12	0.304335	0.399984
RNA_13	0.198274	0.224136
RNA_14	0.456132	0.636354
RNA_15	0.653425	0.727049
RNA_16	0.732119	0.756553
RNA_18	0.681203	0.703323
RNA_19	0.52857	0.665235
RNA_2	0.925413	0.941455
RNA_20	0.425875	0.586099
RNA_21	0.242819	0.500897
RNA_24	0.542162	0.648929
RNA_26	0.391887	0.537493
RNA_29	0.519607	0.61123
RNA_3	0.243021	0.400939
RNA_33	0.257572	0.362314
RNA_35	0.321417	0.571408
RNA_36	0.144569	0.172956
RNA_37	0.367859	0.394624
RNA_38	0.882744	0.933723
RNA_39	0.879794	0.896911
RNA_40	0.637879	0.699092
RNA_41	0.872865	0.892179
RNA_42	0.66948	0.730374
RNA_43	0.616318	0.847764
RNA_44	0.87997	0.897652
RNA_45	0.586936	0.802126
RNA_46	0.469986	0.606946
RNA_47	0.459335	0.608201
RNA_48	0.318822	0.551961
RNA_49	0.642424	0.800609
RNA_5	0.900389	0.941132
RNA_50	0.32352	0.368411
RNA_6	0.11121	0.103907
RNA_7	0.142605	0.209342
RNA_8	0.454532	0.499985
RNA_9	0.241496	0.389066

## Sheet: Figure1D
	Transcription Termination Efficiencies
The Number of U-tracts	>2	2	1	0
	0.12	0.9047	0.8823	0.9999
	0.791	0.9166	0.8889	0.8793
	0.6046	0.8333	0.9167	0.7777
	0.6471	0.911	0.7844	0.8427
	0.4545	0.7887	0.8	0.8387
	0.5534	0.8974	0.8623	0.6229
	0.8184	0.7949	0.6667	0.5833
	0.7666	0.8333	0.9057	0.8916
	0.7818	0.8613	0.6935	0.5666
	0.7704	0.8182	0.7187	0.7857
	0.6774	0.7436	0.7598	0.5393
	0.8128	0.843	0.6821	0.5333
	0.6929	0.8132	0.7879	0.9064
	0.8387	0.8762	0.6271	0.4706
	0.7344	0.7619	0.6789	0.8084
	0.672	0.8571	0.6731	0.5454
	0.5645	0.7358	0.7692	0.9582
	0.6465	0.5379	0.6277	0.5384
	0.4894	0.8465	0.6562	0.7391
	0.736	0.8566	0.48	0.4138
	0.5457	0.8003	0.6718	0.7664
	0.7297	0.7078	0.7368	0.4098
	0.6465	0.8875	0.6	0.3
	0.5527	0.7924	0.8047	0.3333
	0.7389	0.6296	0.6	0.3077
	0.5	0.7812	0.6471	0.4615
	0.6875	0.8127	0.6133	0.4586
	0.35	0.791	0.537	0.51
	0.7448	0.6363	0.6458	0.3928
	0.5882	0.6928	0.5652	0.377
	0.4415	0.8804	0.6916	0.4297
	0.5028	0.8208	0.619	0.4118
	0.4815	0.6522	0.5128	0.3667
	0.3967	0.7143	0.5536	0.0625
	0.2328	0.8656	0.6005	0.32
	0.5333	0.8527	0.701	0.618
	0.2037	0.7396	0.4782	0.2667
	0.4178	0.7	0.4348	0.7058
	0.4066	0.8072	0.6551	0.3889
	0.5041	0.7536	0.5714	0.6323
	0.241	0.6484	0.5	0.2571
	0.2983	0.7187	0.7705	0.2941
	0.1529	0.7539	0.9405	0.3784
	0.4897	0.7658	0.5957	0.28
	0.8952	0.575	0.5122	0.2771
	0.8667	0.6907	0.6786	0.26
	0.875	0.6984	0.6825	0.25
	0.6667	0.1585	0.6573	0.9234
	0.84	0.7833	0.5368	0.2028
	0.8555	0.6168	0.5517	0.3762
	0.8276	0.8142	0.6408	0.5993
	0.8974	0.606	0.7364	0.1818
	0.8095	0.6714	0.4762	0.561
	0.875	0.5833	0.6172	0.4574
	0.7428	0.5806	0.5592	0.3832
	0.8604	0.8539	0.4193	0.4839
	0.7142	0.7391	0.7273	0.5384
	0.8	0.6	0.8035	0.1721
	0.6818	0.7694	0.5496	0.3513
	0.6712	0.5517	0.7186	0.3428
	0.8246	0.5882	0.4348	0.1875
	0.6442	0.6166	0.421	0.225
	0.7127	0.7399	0.537	0.194
	0.8531	0.6842	0.6795	0.2727
	0.8793	0.8041	0.4666	0.1899
	0.625	0.6446	0.55	0.5375
	0.6875	0.613	0.4511	0.3625
	0.625	0.6857	0.6111	0.3704
	0.7469	0.6136	0.5102	0.3333
	0.642	0.7313	0.589	0.4721
	0.7716	0.6332	0.3969	0.1894
	0.7368	0.7931	0.4105	0.3597
	0.7692	0.5795	0.1304	0.2101
	0.6389	0.8273	0.5985	0.1707
	0.7374	0.5917	0.413	0.2107
	0.6913	0.5652	0.6698	0.2278
	0.7025	0.7428	0.5192	0.1719
	0.6667	0.6107	0.4423	0.1837
	0.5369	0.6	0.4842	0.1405
	0.66	0.7707	0.5063	0.5909
	0.7254	0.5753	0.4364	0.3241
	0.8246	0.5683	0.6491	0.1639
	0.6547	0.4722	0.3571	0.5537
	0.8192	0.6428	0.7472	0.1628
	0.407	0.65	0.7594	0.1484
	0.647	0.6379	0.3226	0.1343
	0.6778	0.6111	0.575	0.1818
	0.5597	0.6781	0.5161	0.303
	0.6942	0.7906	0.4237	0.1444
	0.6195	0.5699	0.3724	0.134
	0.865	0.7344	0.4256	0.6108
	0.6879	0.72	0.667	0.1679
	0.6071	0.6286	0.5217	0.1268
	0.7083	0.6213	0.5869	0.1731
	0.8412	0.7149	0.4333	0.1189
	0.7196	0.5786	0.3198	0.1786
	0.8494	0.7266	0.45	0.1333
	0.7529	0.6666	0.3235	0.1667
	0.7547	0.625	0.4	0.3182
	0.6674	0.5824	0.2931	0.7136
	0.7461	0.5091	0.3097	0.1364
	0.7831	0.5	0.3333	0.1096
	0.6796	0.5875	0.4286	0.296
	0.7742	0.6421	0.3333	0.1895
	0.7955	0.5517	0.5	0.1733
	0.6111	0.5278	0.4404	0.3015
	0.6353	0.5676	0.44	0.2273
	0.5588	0.5246	0.2787	0.0985
	0.5091	0.5238	0.32	0.0968
	0.8159	0.5393	0.5	0.1892
	0.566	0.4505	0.3	0.1439
	0.5987	0.55	0.4127	0.1393
	0.5062	0.6558	0.7555	0.1288
	0.5385	0.8086	0.3615	0.225
	0.7028	0.4615	0.4474	0.1333
	0.5792	0.538	0.2651	0.2581
	0.5631	0.4219	0.4681	0.3333
	0.6413	0.5946	0.3962	0.2059
	0.6438	0.6818	0.3276	0.1596
	0.643	0.4732	0.2813	0.625
	0.4333	0.4305	0.2	0.56
	0.7988	0.619	0.425	0.2797
	0.569	0.473	0.4583	0.4333
	0.6	0.745	0.25	0.125
	0.5401	0.5148	0.3148	0.1538
	0.702	0.6713	0.4579	0.2308
	0.6208	0.7143	0.2022	0.0776
	0.6364	0.5169	0.2549	0.16
	0.6953	0.425	0.68	0.5091
	0.6042	0.4884	0.2447	0.2414
	0.5083	0.425	0.4	0.1589
	0.5749	0.6301	0.2083	0.1235
	0.4483	0.4506	0.3165	0.4
	0.4762	0.6538	0.5	0.5
	0.459	0.4242	0.3	0.6605
	0.6488	0.4648	0.3823	0.36
	0.7023	0.4615	0.449	0.1685
	0.4783	0.5444	0.3333	0.1127
	0.6739	0.5366	0.3367	0.2432
	0.4934	0.4836	0.3664	0.2973
	0.7073	0.6364	0.3278	0.1224
	0.7692	0.6743	0.2667	0.2909
	0.575	0.4074	0.2727	0.1721
	0.6486	0.5822	0.2052	0.2222
	0.776	0.5263	0.169	0.1494
	0.76	0.5728	0.2062	0.7994
	0.4708	0.589	0.1228	0.0654
	0.6071	0.6189	0.2965	0.2619
	0.4643	0.4	0.3949	0.4426
	0.5204	0.3439	0.3404	0.3548
	0.4386	0.6826	0.1739	0.0124
	0.4792	0.4213	0.2059	0.1778
	0.5596	0.7402	0.1613	0.296
	0.5714	0.4483	0.2727	0.2449
	0.5571	0.3809	0.1882	0.45
	0.4317	0.4574	0.2568	0.2644
	0.4884	0.4815	0.3333	0.221
	0.4242	0.3945	0.1679	0.3226
	0.5208	0.4752	0.2581	0.4773
	0.4512	0.4248	0.1397	0.6462
	0.4282	0.6143	0.5091	0.2414
	0.6206	0.4568	0.1538	0.3608
	0.3636	0.46	0.2857	0.1603
	0.5	0.4286	0.3263	0.1542
	0.5366	0.3784	0.4947	0.432
	0.3461	0.6128	0.1389	0.3421
	0.4533	0.7085	0.2424	0.2476
	0.3664	0.7735	0.1475	0.3333
	0.7713	0.4545	0.1014	0.3214
	0.4967	0.4583	0.205	0.2727
	0.4631	0.4613	0.2927	-0.3245
	0.3409	0.4118	0.1647	0.7111
	0.2414	0.3656	0.2461	0.3863
	0.3729	0.6048	0.1667	0.4173
	0.4423	0.6667	0.2593	-1.0773
	0.2474	0.7058	0.1418	0.8045
	0.5579	0.4222	0.3019	0.3906
	0.36	0.4166	0.2823	0.4627
	0.3868	0.3611	0.3214	0.8382
	0.266	0.3276	0.3176	0.213
	0.3529	0.706	0.2786	0.5968
	0.4242	0.3421	0.3091	0.4468
	0.3442	0.836	0.0986
	0.3543	0.6666	0.4815
	0.3152	0.6986	0.3171
	0.2973	0.6133	0.1636
	0.6053	0.7249	0.142
	0.32	0.3846	0.3378
	0.1705	0.5275	0.4038
	0.1888	0.6875	0.156
	0.3247	0.4851	0.1042
	0.5681	0.4151	0.6873
	0.2424	0.5	0.0937
	0.678	0.4496	0.1638
	0.5638	0.6273	0.1905
	0.1562	0.3344	0.2121
	0.298	0.6915	0.5111
	0.3	0.5749	0.3058
	0.4259	0.4054	0.1839
	0.1972	0.585	0.4526
	0.2578	0.8181	0.1719
	0.3916	0.3731	0.0769
	0.1564	0.3077	0.4088
	0.2843	0.375	0.1613
	0.4286	0.5	0.2893
	0.1325	0.5319	0.1697
	0.3276	0.4954	0.4341
	0.3243	0.2387	0.0652
	0.547	0.4286	0.2211
	0.1287	0.5658	0.5795
	0.4	0.5122	0.4176
	0.4138	0.3934	0.5312
	0.3054	0.3182	0.2547
	0.2381	0.3267	0.2564
	0.3286	0.4033	0.5791
	0.4098	0.5305	0.6
	0.3582	0.2778	0.4166
	0.4571	0.2979	0.8064
	0.25	0.5362	0.5006
	0.2397	0.3778
	0.375	0.3333
	0.1746	0.3748
	0.4	0.5
	0.1815	0.5205
	0.3921	0.2857
	0.4318	0.6085
		0.4694
		0.4494
		0.3144
		0.4956
		0.3279
		0.2295
		0.3009
		0.2952
		0.3704
		0.287
		0.5048
		0.3333
		0.2743
		0.2273
		0.4138
		0.2745
		0.2794
		0.2969
		0.3947
		0.5077
		0.678
		0.2568
		0.3469
		0.3704
		0.25
		0.3485
		0.5849
		0.1458
		0.592
		0.35
		0.3034
		0.2459
		0.3052
		0.3377
		0.4615
		0.3788
		0.3669
		0.5039
		0.2913
		0.2186
		0.4931
		0.3
		0.275
		0.1875
		0.3243
		0.25
		0.4906
		0.4068
		0.3146
		0.6687
		0.4706
		0.6511
		0.1607
		0.2778
		0.3095
		0.7263
		0.2718
		0.6391
		0.4261
		0.4348
		0.3219
		0.3333
		0.2239
		0.1982
		0.1842
		0.2604
		0.2
		0.21
		0.1201
		0.1685
		0.4076
		0.3478
		0.2133
		0.4117
		0.2667
		0.2093
		0.5329
		0.1458
		0.1446
		0.2776
		0.0974
		0.4324
		0.473
		0.7307
		0.2703
		0.25
		0.1468
		0.1589
		0.6647
		0.18
		0.5278
		0.445
		0.3191
		0.32
		0.2025
		0.5333
		0.4627
		0.3882
		0.3636
		0.4663
		0.2154
		0.0412
		0.2857
		0.3704
		0.1622
		0.8716
		0.5
		0.6891

## Sheet: Figure 1- figure supplement 1D
The number of TTSs	The percentages of TUs
1	0.4
2	0.24
3	0.16
4	0.1
5	0.05
>6	0.05

## Sheet: Figure 1- figure supplement 2A
3'UTR Length (nt)
Primary TTSs	Secondary TTSs
196	52
38	175
43	20
26	33
47	33
37	68
98	23
101	62
20	27
56	43
56	64
25	45
13	90
18	86
35	22
23	46
44	53
53	112
146	110
125	85
142	157
16	145
120	38
112	44
103	96
94	37
109	20
50	37
60	56
156	29
31	77
71	53
28	90
29	54
20	31
30	35
20	39
24	43
33	84
26	94
19	84
20	56
64	49
38	47
60	36
118	74
120	28
87	29
29	42
38	71
105	72
40	31
155	45
15	47
165	49
32	54
121	57
33	35
6	145
11	135
17	46
22	48
50	51
61	71
12	194
27	116
31	113
57	109
183	62
52	169
14	64
39	44
20	59
25	65
36	67
87	96
36	85
22	25
117	88
32	80
33	59
43	56
45	136
26	102
112	56
182	39
45	96
31	38
40	32
33	28
19	87
43	10
19	21
17	30
14	157
58	132
143	38
87	35
20	31
80	36
150	57
31	186
76	17
40	70
91	94
147	100
46	48
2	33
27	96
53	98
55	35
38	38
79	90
36	115
3	119
144	123
30	39
19	74
58	49
37	53
72	55
40	41
22	165
68	42
31	24
29	35
45	182
37	24
70	30
29	42
23	56
55	72
26	79
46	14
24	22
95	60
43	63
20	67
118	74
22	82
102	105
26	23
82	28
191	94
43	43
79	72
69	95
51	59
75	40
27	88
104	36
96	65
33	62
125	74
24	69
44	66
57	64
47	46
26	16
73	25
167	33
39	169
96	44
35	33
35	13
122	26
59	66
10	72
18	75
26	98
46	81
81	84
82	109
24	80
115	77
48	14
47	17
181	24
35	27
22	37
35	18
29	70
60	80
32	67
36	62
42	48
31	36
176	84
22	34
30	49
53	52
13	62
10	71
193	29
125	126
24	155
73	20
0	104
0	109
63	109
31	147
23	150
32	36
43	31
19	79
40	194
198	66
69	56
14	53
194	51
165	48
55	34
181	196
50	103
197	64
34	180
36	86
52	70
115	40
128	35
31	167
63	123
37	50
14	54
132	38
33	41
16	63
36	18
52	43
34	32
22	46
42	49
21	62
110	30
26	138
6	159
42	191
18	12
134	162
170	39
36	33
29	37
83	56
28	63
33	66
195	135
35	195
158	29
28	78
32	114
48	124
68	56
48	29
18	25
44	52
14	73
27	99
18	106
22	30
47	176
33	193
22	198
29	54
15	45
170	37
63	39
31	51
29	16
44	73
51	49
3	55
149	30
20	58
25	42
150	36
25	64
31	70
73	55
24	60
22	98
139	6
76	10
101	12
21	92
50	97
81	100
42	163
14	4
51	7
132	9
80	41
197	38
73	26
49	36
46	27
29	23
26	159
50	40
39	48
20	42
47	87
80	61
157	93
175	106
20	179
20	130
18	167
25	66
56	69
37	73
21	76
23	81
10	108
40	29
23	162
35	155
20	147
70	142
36	171
155	59
199	33
58	56
17	45
41	42
53	39
122	22
20	85
21	39
39	35
60	45
53	53
53	55
123	60
21	72
166	81
25	32
23	154
37	38
16	15
180	24
24	80
24	87
180	178
156	175
19	23
83	75
28	38
41	42
172	22
134	25
74	51
22	199
24	168
57	192
36	30
18	95
24	135
16	18
44	29
25	42
33	53
53	51
30	31
61	24
181	33
40	38
40	43
59	158
38	37
29	44
23	88
31	156
34	169
64	177
23	34
38	39
14	20
26	158
168	98
53	51
22	57
30	68
20	75
31	78
28	88
155	95
14	60
78	53
60	42
173	24
44	81
66	23
41	139
49	32
35	187
19	196
66	33
35	84
62	50
27	69
113	98
18	146
96	48
105	73
30	97
32	100
35	103
55	59
81	166
13	71
32	43
23	34
15	42
127	46
64	53
167	23
54	27
68	15
100	80
113	49
25	20
20	26
28	30
52	30
34	50
35	27
88	31
23	88
9	33
57	29
47	64
31	42
40	37
72	45
194	22
61	14
194	24
34	20
32	120
44	128
33	151
165	89
32	35
37	33
52	29
24	64
33	200
38	60
28	65
2	142
24	19
17	67
40	56
69	54
11	32
154	29
27	8
27	91
103	173
33	29
47	38
30	47
81	57
130	30
32	135
22	89
122	114
52	21
38	34
83	176
46	165
50	89
185	92
64	34
31	38
21	42
46	44
74	70
21	57
62	50
77	46
21	22
138	29
45	72
47	30
17	38
66	82
51	110
83	123
5	123
39	19
23	36
27	63
45	70
123	77
30	31
30	37
21	100
96	70
39	50
21	41
23	35
23	30
21	92
184	170
158	85
17	18
37	50
12	53
32	68
30	117
20	32
43	38
49	124
35	97
75	89
110	36
24	64
40	18
40	40
84	35
172	45
33	52
40	72
53	200
24	20
97	62
24	128
98	57
41	80
23	23
39	69
49	73
42	80
33	53
64	28
32	77
16	32
12	47
47	76
25	62
111	58
157	43
46	38
93	121
71	115
14	48
164	79
126	77
35	73
199	71
44	18
62	25
18	37
114	45
92	69
52	30
35	24
174	144
110	60
73	158
39	38
21	57
33	66
20	65
50	85
78	88
67	119
68	134
121	17
174	36
146	42
190	74
15	20
145	49
27	59
18	65
115	68
7	108
19	22
35	95
54	62
20	59
186	13
21	200
28	19
71	196
86	25
11	70
45	50
29	31
145	58
42	46
127	107
77	84
141	73
37	36
186	9
39	26
40	50
38	31
21	113
54	52
71	72
67	44
42	37
53	33
149	21
26	20
78	101
98	51
129	34
29	60
56	66
135	80
39	41
24	78
39	68
160	117
27	108
2	58
40	30
23	49
27	51
20	56
161	59
3	62
91	71
6	102
44	110
19	113
43	121
22	143
30	81
31	33
19	179
92	54
21	125
55	47
38	55
48	25
55	130
23	112
68	72
131	61
51	59
22	40
24	50
35	54
30	58
22	120
23	56
25	50
28	40
5	23
132	27
156	32
23	149
45	186
26	190
22	192
20	87
18	98
44	107
27	32
97	59
59	177
17	164
53	42
13	35
25	44
49	54
114	74
35	22
3	69
91	62
106	13
21	43
17	77
139	120
45	123
43	126
63	129
39	132
26	157
37	163
54	170
70	95
39	92
164	135
28	17
43	66
17	94
149	105
66	128
60	131
81	138
71	43
28	50
38	96
182	47
37	32
62	115
19	35
10	46
174	129
133	107
151	56
2	45
29	47
29	42
30	39
24	99
33	41
26	61
17	198
79	48
38	129
24	78
91	26
22	187
180	29
27	45
72	50
20	48
58	29
46	27
38	21
21	121
23	118
146	101
77	20
46	30
37	157
108	32
111	7
29	177
28	51
19	140
30	47
46	43
34	36
29	33
162	22
20	188
16	63
24	61
48	77
11	22
89	14
24	35
165	70
25	72
77	166
23	164
50	54
23	33
25	147
21	48
46	44
179	32
38	76
134	41
178	20
129	29
30	38
82	49
27	71
23	146
53	183
25	148
72	126
21	134
109	91
97	37
10	110
65	77
6	70
80	63
106	59
13	53
105	45
59	52
175	56
38	50
174	32
63	27
45	31
61	34
106	31
41	27
63	23
31	29
57	36
34	54
52	19
67	26
25	47
80	95
9	35
75	37
33	39
46	90
12	35
137	101
35	144
36	186
93	27
81	30
62	78
161	68
16	66
28	58
36	40
49	32
86	65
26	70
50	25
47	28
25	31
133	44
123	59
35	61
91	82
30	164
126	178
43	198
53	27
63	32
29	38
56	55
27	26
59	34
37	67
21	71
12	90
160	96
98	18
146	86
24	102
51	8
59	14
11	89
27	144
75	27
164	33
27	60
28	67
42	75
39	160
67	32
79	15
118	47
17	53
6	71
33	118
39	39
27	50
24	54
142	78
27	87
23	43
26	16
31	63
17	135
61	177
129	29
43	46
165	62
4	86
150	16
42	50
25	57
17	82
47	183
30	191
190	37
30	114
113	88
116	74
24	47
23	42
21	37
62	32
45	29
29	22
55	62
88	45
37	65
22	41
60	136
59	175
25	21
90	165
44	13
15	185
13	122
18	115
42	46
42	22
90	74
70	182
161	44
146	145
198	171
168	166
56	163
50	158
36	130
28	41
38	34
190	134
31	129
81	123
56	41
10	38
74	124
33	60
71	40
31	34
89	100
25	44
32	41
47	28
30	92
130	86
36	30
42	49
83	71
122	122
28	141
41	31
34	119
76	21
67	32
55	37
25	40
36	3
92	13
18	16
76	27
42	29
59	175
126	13
130	126
191	101
156	146
24	153
5	51
33	61
25	24
100	172
18	125
67	123
12	112
34	51
173	44
37	41
186	38
22	35
	32
0	25
65	21
83	87
65	83
38	37
53	38
0	36
3	105
8	23
3	69
3	36
0	40
6	104
8	109
12	119
9	26
15	43
127	33
2	115
91	90
3	32
10	40
48	47
2	57
48	31
2	48
14	63
48	74
11	41
27	49
27	65
28	74
1	30
2	35
159	163
78	165
13	17
200	19
35	88
	61
	71
	30
	38
	109
	123
	135
	167
	43
	82
	41
	129
	20
	25
	6
	13
	49
	96
	113
	121
	123
	137
	164
	185
	191
	195
	51
	87
	89
	138
	60
	72
	140
	142
	45
	81
	79
	39
	30
	54
	36
	33
	126
	115
	108
	60
	72
	53
	16
	26
	38
	131
	151
	154
	44
	63
	120
	152
	21
	144
	37
	93
	132
	56
	44
	42
	22
	34
	57
	61
	30
	127
	45
	69
	31
	22
	126
	134
	148
	197
	41
	53
	72
	79
	88
	50
	48
	41
	137
	79
	67
	61
	19
	158
	30
	56
	60
	68
	70
	66
	62
	157
	37
	24
	82
	53
	37
	54
	118
	51
	60
	24
	142
	107
	24
	65
	39
	42
	45
	38
	149
	175
	30
	38
	29
	32
	37
	93
	14
	50
	55
	58
	197
	57
	69
	22
	33
	35
	37
	24
	14
	58
	86
	38
	46
	58
	125
	181
	39
	44
	29
	64
	103
	24
	56
	68
	14
	64
	65
	71
	31
	39
	57
	66
	67
	46
	38
	31
	26
	22
	18
	58
	125
	77
	49
	47
	32
	196
	183
	190
	63
	56
	59
	43
	25
	68
	70
	76
	111
	149
	91
	124
	135
	53
	196
	93
	85
	78
	43
	52
	56
	22
	112
	70
	60
	54
	40
	17
	132
	51
	48
	104
	96
	106
	97
	198
	78
	11
	144
	22
	53
	111
	106
	101
	95
	188
	146
	124
	25
	22
	123
	83
	81
	139
	147
	148
	23
	26
	197
	39
	13
	23
	70
	14
	179
	44
	98
	71
	45
	27
	109
	190
	18
	15
	179
	25
	36
	54
	62
	19
	3
	11
	14
	22
	89
	169
	18
	56
	64
	83
	11
	174
	11
	14
	18
	3
	11
	15
	19
	10
	22
	54
	82
	0
	8
	7
	9
	12
	20
	32
	17
	12
	10
	7
	11
	103
	15
	10
	65
	24
	17
	12
	12
	3
	132
	123
	168
	126
	16
	23
	19
	17
	14
	2
	17
	63
	59
	23
	19
	17
	14
	17
	10
	63
	59
	20
	17
	10
	26
	23
	3
	66
	63
	59
	141
	55
	41
	20
	16
	42
	31
	31
	8
	10
	17
	40
	50
	55
	3
	18
	24
	157
	15
	10
	120
	128

## Sheet: Figure 1- figure supplement 2B
Head Read Abundance
Primary TTSs	Secondary TTSs
6	25
32	11
45	47
54	13
53	8
10	12
22	77
48	7
10	8
10	59
136	7
7	23
16	10
23	10
141	7
15	8
15	16
62	23
22	8
12	16
14	8
69	9
42	78
6	17
24	19
9	6
44	40
7	27
26	7
18	12
133	6
36	11
50	31
165	6
22	654
13	98
45	56
1986	23
65	26
503	16
89	6
66	22
131	13
194	19
16	35
453	38
17	23
17	57
14	39
84	10
7699	16
18	87
18	36
47	9
14	10
298	11
33	12
37	6
9	6
95	12
139	38
440	9
15	14
20	16
12	209
971	618
69	766
14	15
11453	9
10	18
96	10
7	33
10	12
6	16
14	10
24	6
21	6
147	12
27	12
193	9
9	33
28	33
83	11
226	10
57	8
15	82
217	13
26	79
21	44
71	43
17	13
57	10
919	13
36	11
17	6
98	25
16	96
11	13
1680	78
24	23
51	46
357	6
187	32
6	10
12	18
11	7
95	13
7	12
36	16
218	7
47	9
76	29
15	25
11	37
314	9
58	26
6	6
11	7
51	32
47	8
59	10
8	6
8	7
106	8
9	58
34	32
34	12
14	168
103	89
10	105
59	38
17	16
11	13
62	10
17	8
10	25
71	35
230	32
17	8
6	6
50	6
326	324
8	219
30	19
232	41
37	6
412	10
6	34
37	70
1915	18
9	8
20	17
67	76
17	11
34	7
12	28
18	10
33	17
12	9
26	12
7	11
73	7
10	8
20	11
12	23
11	50
28	47
6	8
21	6
57	7
96	6
76	17
44	7
60	10
91	10
69	18
618	18
6	11
22	10
82	13
100	6
207	7
6	7
94	16
425	7
103	16
8	13
6	10
24	6
122	18
48	7
30	7
6	8
15	22
12	6
25	7
221	15
14111	16
1126	7
9	9
123	7
6	10
44	7
11	26
53	7
13	7
10	9
11	12
10	44
6	25
12	46
7	211
6	11
7	13
6	346
807	9
94	21
1841	29
102	16
13	338
25	8
13992	10
26	19
22	16
7849	7
69	31
50	8
74	9
7	12
24	12
18	9
89	25
71	9
25	11
65	17
8	20
19	12
175	13
13	8
97	7
10	9
8	63
9	72
21	7
90	7
7	10
26	9
233	19
28	19
10	8
25	7
9	10
12	31
6	45
45	451
34	64
159	269
18	26
33	15
13	44
62	37
11	6
37	34
75	69
36	25
273	9
216	15
32	33
8	33
107	27
781	18
367	18
6	8
20	13
30	10
13	12
8	10
32	13
13	11
8	14
9	338
31	367
41	545
7	47
31	6
11	6
23	130
8	15
75	15
6	8
65	9
159	20
8	33
15	6
18	7
16	7
7	12
22	35
41	10
20	18
14	8
45	169
16	59
8	26
30	7
13	10
19	8
89	595
49	235
8	748
124	540
15	19
7	6
26	10
69	8
379	33
10	785
129	1214
1617	27
55	15
116	24
21	48
10	11
39	8
169	6
6	17
18	6
142	8
8	60
20	50
74	19
9	8
38	7
219	6
12	10
358	7
97	6
39	15
12	79
24	13
22	51
26	7
1007	53
705	21
7	16
264	7
384	8
1885	7
17	13
45	8
22	12
404	8
33	16
20	7
10	8
194	6
52	6
15	23
10	8
1373	6
8	6
54	6
39	15
29	90
18	31
51	12
1505	21
21	8
39	6
207	6
32	7
10	8
30	6
10	6
72	8
42	15
15	7
1793	28
25	21
17	267
11	132
16	55
17	25
34	90
66	8
8	9
63	17
10	6
80	38
22	7
84	35
91	10
126	231
382	166
17	9
34	21
537	9
9	9
40	6
14	16
22	12
133	7
15	12
50	7
384	14
15	7
12	6
80	8
128	11
189	29
29	12
25	6
18	8
7	12
42	7
40	7
156	6
26	9
15	6
9	8
37	19
11	15
22	14
9	21
13	6
8	19
6	11
6	8
15	7
39	18
6	10
25	52
13	80
21	163
23	10
17	33
10	13
10	151
15	11
14	13
18	6
6	7
12	7
8	12
11	10
10	6
15	6
34	17
597	30
70	8
12	29
17	9
67	7
9	22
18	18
136	18
70	6
24	9
48	8
7	27
33	15
302	42
21	8
42	26
8	11
91	18
7	10
37	25
40	7
26	293
41	112
19	11
52	15
17	224
10	30
32	14
29	12
30	29
1070	40
29	159
30	61
52	11
25	18
13	7
59	231
6	39
13	15
18	6
23	7
18	6
7	11
66	13
21	9
135	7
31	66
203	7
8	6
33	17
36	8
12	144
39	101
297	83
33	1202
161	8
10	10
10	13
46	30
64	166
30	9
26	9
21	9
30	12
7	12
10	21
41	16
3813	36
13	163
43	50
13	18
8	8
8	141
32	93
32	15
15	39
46	8
61	7
60	8
114	7
53	30
19	22
9	13
38	17
8	46
15	7
14	12
68	56
115	16
37	58
19	8
137	9
6	8
34	31
11	9
10	10
63	11
26	6
42	21
10	11
10	7
1906	37
8	10
99	6
37	12
373	17
16	8
6	14
8	40
8	27
105	6
145	26
15	6
16	36
6	37
29	11
28	7
34	21
28	41
30	9
6	11
9	15
14	14
13	7
9	12
12	106
6	94
6	17
17	27
34	14
7	6
131	7
34	6
583	9
26	14
17	16
24	8
37	8
18	7
8	13
27	6
38	7
140	6
24	6
47	6
8	14
35	14
7	71
37	51
11	27
24	17
15	22
17	11
32	18
40	6
6	7
8	20
25	51
48	21
16	100
59	14
10	16
10	6
24	27
53	42
571	7
10	13
343	8
44	8
48	17
8	6
15	16
74	22
436	93
378	48
389	16
80	29
17	20
50	11
8	15
15	26
6	13
302	9
13	10
118	6
226	10
12	10
17	6
310	7
160	6
1027	17
39	7
54	6
339	6
30	10
17	14
7	14
28	6
24	68
65	36
14	7
14	9
618	10
433	15
207	16
12	154
112	146
26	30
112	21
866	8
13	20
9	9
14	6
12	16
14	7
254	11
65	9
8	11
21	9
10	28
23	15
8	80
6	14
40	7
32	11
21	26
6	17
14	16
7	15
10	6
484	1777
10	228
80	336
65	64
10	65
65	34
413	46
57	26
9	12
38	10
31	6
14	6
161	7
11	6
9	30
102	21
15	11
18	36
9	8
13	26
27	11
310	8
19	23
8	19
7	14
7	10
9	7
560	8
63	13
5218	32
40	62
331	8
1807	16
10	26
48	11
224	26
45	11
49	24
15	8
24	31
205	7
26	6
96	10
52	607
667	199
145	11
194	6
17	27
109	32
53	17
8	6
10	20
22	76
26	7
48	15
21	9
7	22
10	8
2443	6
6	7
23	6
28	22
14	10
57	13
24	17
7	20
19	26
7	28
349	70
25	9
10	6
14	17
50	11
350	8
764	7
758	25
471	7
77	8
29	9
12	17
51	6
54	6
12	23
189	6
22	24
49	6
44	12
729	7
11	6
8	13
29	11
12	12
85	6
16	7
162	6
13	30
15	22
119	6
110	38
565	29
46	109
50	275
62	320
15	33
449	13
167	7
14	26
20	7
20	20
137	6
17	7
1983	57
350	13
183	12
6	27
25	7
146	6
147	78
161	24
713	66
107	6
34	21
59	11
48	8
34	7
72	12
206	28
56	21
6	25
16	17
11	18
7	75
7	101
6	86
214	32
27	29
194	39
7	91
36	7
31	14
16	10
86	11
27	6
32	6
11	6
17	8
66	36
9	6
26	9
13	78
202	76
29	38
9	7
80	121
26	65
288	22
204	31
12	16
16	17
9	113
11	10
688	16
91	32
258	92
12	9
960	9
21	66
21	112
11	129
38	35
167	19
29	15
40	9
18	8
8	90
127	41
15	20
391	24
18	28
93	31
15	36
336	8
1099	13
75	8
70	6
71	19
24	9
14	7
25	49
1501	23
11	33
64	17
15	59
9	29
2931	11
61	6
7	7
49	10
200	8
908	6
8	16
145	10
391	9
553	9
74	73
53	73
15	36
30	209
6	28
10	8
28	21
9	18
36	6
191	85
399	12
25	10
15	26
24	7
102	14
6	48
10	30
91	266
6	7
6	34
10	150
13	11
63	95
24	484
38	477
53	4543
87	47
6	41
6	84
15	23
165	32
11	228
201	165
82	152
50	7
397	7
15	7
16	12
6	7
11	24
10	12
382	8
17	13
23	7
20	9
11	17
6	69
8	38
24	19
38	79
42	16
7	65
114	95
7	121
26	15
26	145
1366	7
115	7
243	8
193	11
20	30
24	13
1287	39
59	12
7	8
65	6
5612	6
32	13
32	7
36	8
508	6
60	6
12	8
9	20
109	148
13	76
7	106
175	335
13	445
1730	6
6	13
7	10
23	24
26	27
658	7
563	14
1109	6
222	8
61031	6
316	15
93	25
44	6
45	9
29	10
212	23
296	93
17	57
9	15
181	82
1172	47
47617	60
4611	17
48216	7
4703	59
47274	16
355	7
4670	13
14026	350
1331	32
1299	59
769	17
303976	11
1426216	8
11	68
125	15
81	77
15	57
71	58
	106
	106
	328
	407
	162
	43
	35
	44
	26
	17
	47
	43
	14
	19
	16
	24
	592
	477
	158
	100
	51
	29
	33
	28
	9
	15
	45
	13
	26
	9
	50
	22
	6
	17
	46
	7
	10
	66
	83
	32
	24
	57
	19
	40
	32
	8
	29
	9
	8
	7
	15
	91
	13
	8
	16
	7
	8
	8
	6
	6
	18
	18
	12
	9
	10
	7
	65
	50
	16
	7
	32
	11
	11
	6
	7
	10
	21
	25
	29
	6
	11
	6
	43
	13
	6
	17
	17
	23
	9
	47
	42
	151
	141
	10
	68
	111
	12
	19
	14
	27
	17
	10
	68
	362
	7
	8
	7
	8
	10
	10
	36
	28
	6
	6
	19
	6
	7
	8
	22
	6
	12
	115
	485
	169
	6
	8
	14
	29
	23
	336
	148
	51
	66
	10
	12
	770
	163
	140
	21
	19
	35
	41
	18
	61
	22
	11
	16
	7
	10
	7
	46
	7
	6
	43
	25
	7
	15
	10
	14
	15
	18
	16
	14
	6
	6
	11
	7
	8
	17
	13
	44
	8
	7
	7
	10
	8
	28
	18
	8
	13
	8
	10
	8
	11
	78
	113
	9
	8
	11
	6
	10
	47
	123
	10
	13
	20
	21
	23
	267
	22
	23
	15
	6
	8
	16
	50
	134
	259
	6
	7
	9
	6
	9
	7
	16
	13
	111
	87
	6
	14
	9
	20
	13
	109
	259
	6
	7
	8
	13
	12
	19
	10
	17
	8
	17
	10
	22
	6
	29
	32
	24
	34
	24
	73
	17
	15
	11
	57
	16
	118
	45
	6
	8
	8
	12
	7
	13
	70
	7
	293
	579
	156
	15
	24
	7
	32
	8
	77
	53
	46
	16
	35
	303
	34
	12
	54
	93
	7
	16
	577
	338
	249
	712
	1406
	147
	49
	143
	37
	14
	9
	11
	16
	19
	31
	10
	42
	6
	10
	7
	6
	23
	40
	92
	234
	10
	11
	101
	130
	507
	382
	1063
	2368
	3563
	46984
	92
	8
	191
	366
	1027
	2274
	3599
	96
	47157
	9
	252
	2258
	109
	46905
	6
	25
	163
	6
	15
	218
	12
	76
	50
	1367
	772
	40
	316
	331
	3677
	4626
	2382
	70
	185
	22
	234
	110143
	292
	22
	186
	289
	74
	8

## Sheet: Figure 1- figure supplement 2C
Transcription Termination Efficiencies
Primary TTSs	Secondary TTSs
18.18	25.13
21.86	9.9
25.78	25.35
53.69	16.84
50.91	10.34
12	78.05
78.57	13.36
48.51	20.83
12.87	19.12
50	43.48
80.41	21.54
9.86	14.59
24.47	14.71
15.85	23.08
53.29	25.58
76	39.13
9.74	13.49
64.13	47.54
53.7	13.24
41.93	18.82
14.44	18.18
70.78	7.79
81.82	65.64
13.43	34.54
39.69	41.18
33.33	38.46
63.23	8.62
32	32.86
32.26	26.47
25.68	19.35
58.75	73.68
45.74	37.74
67.89	68.89
62.06	12.5
29.79	69.47
28.23	33.33
58.24	23.84
56.58	23.67
23.87	23.23
70.23	55.26
51	21.74
30.09	42.1
82.08	10.64
61.89	15.06
82.76	25.21
79.94	27.54
44.68	23.46
25.71	31.69
55.88	43.03
47.08	25
66.47	56.1
38.68	24.49
45.83	39.53
53.8	19.28
25	18.84
69.53	30.61
73.91	41.18
49.54	11.11
27.27	76.47
39.49	42.86
26.04	39.46
62.08	23.96
22.78	32.88
45.68	53.33
20.25	45.16
79.55	43.81
67.78	35.31
76.92	32.61
-107.73	28.3
53.33	37.5
56.99	14.52
64.7	30.99
73.68	15.73
40.74	36.36
56.52	28.3
42.22	74.99
17.46	28
69.29	17.52
55.36	33.33
83.6	20.31
42.86	31.71
67.31	25.9
40.7	17.54
61.33	15.87
41.73	17.07
15.96	49.71
78.18	10.69
53.62	42.74
74.28	20
74.61	18.84
66.66	26.67
60.46	11.11
59.2	12.98
61.11	16.96
66.67	50
43.86	71.87
12.88	64.48
7.69	34.48
66.7	34.37
13.33	15.92
42.97	65.52
54.57	7.69
40.38	33.33
25	31.11
16.67	72.34
45	88.88
42.59	27.83
99.99	26.87
50.48	41.51
68.75	36.36
61.68	16.67
42.56	87.72
27.78	20.77
24.1	40.12
32.78	21.43
84.27	58.49
41.38	13.04
73.07	15.09
32	48.28
80.95	26.32
50	43.48
42.42	23.08
44.83	56.25
67.13	59.26
36	30.97
50.62	16.74
73.74	28.57
60.6	27.25
81.32	19.64
33.33	31.06
57.92	34.67
39.21	25.53
16.07	22.39
61.72	17.24
52.78	53.57
35.13	21.22
56.83	22.8
73.96	41.55
52.08	16
33.33	20
43.17	13.04
79.06	38.82
47.06	56.5
29.27	16
67.96	14.35
29.6	29.63
48.97	17.95
28	40.27
21	24.18
64.3	63.33
9.68	21.28
16.79	64.86
50.77	70.4
53.12	36.36
69.13	38.23
53.66	52.11
37.04	22.09
49.47	23.13
53.66	14.14
65.62	16.28
21.21	19.44
49.34	15.94
20	25.86
45.05	17.82
25.68	57.75
27.87	20.62
20.28	71.43
18.92	35.13
55.17	45.83
58.5	99.99
26.6	15.79
42.61	41.67
31.46	33.33
36.15	27.66
64.2	30.88
70.25	12.82
29.83	19.12
20.83	14.68
67.39	13.98
20.37	45.71
31.48	20.63
77.16	79.99
16.13	33.33
61.95	31.32
74.02	30.77
41.78	28.95
43.48	19.49
33.33	12.24
30	50
71.49	30.23
61.07	18.33
50	15.56
29.41	21.62
37.88	29.46
21.54	9.68
40	14.75
64.08	12.05
80.84	19.35
91.67	20.55
44.74	11.83
76.92	16
64.28	17.46
88.04	13.64
60.71	34.11
73.64	24.44
76.66	14.29
35.48	14.58
70.58	21.43
44	50
20.59	23.94
52.17	26.8
23.08	26.9
15.38	10
24.24	16.48
46.66	31.71
86.5	16.05
68.25	26.15
86.56	16.6
70.28	80.77
21.3	80.85
57.53	13.11
82.46	11
71.43	12.57
43.64	43.08
77.42	16
31.98	34.01
22.11	44.83
55.96	17.65
77.77	22.86
46	13.49
35.82	16.35
44.15	59.77
70.83	50
83.87	18.28
77.04	14.29
32.35	22.81
61.43	30.77
60.05	19.23
11.89	22.5
56.81	17.78
46.15	20.69
25	12.22
38.46	70.18
50	25.93
66.67	17.5
26.67	32.35
56.45	21.43
79.1	31.06
50.91	37.31
24.49	41.66
50.63	14.49
36.36	28.95
42.1	23.2
14.58	18.77
71.96	40.51
60	12.86
56.31	74.82
43.48	30.71
61.36	30.88
23.28	41.12
63.91	48.96
14.46	15.56
47.32	19.9
57.86	32.4
22.1	32.56
53.93	21.31
72.97	50
62.86	15.21
30	75.92
66.74	28.96
50.06	6.29
87.93	27.59
41.17	12.96
42.86	61.76
31.44	32.26
41.38	46.51
57.14	70
63.01	75.86
45.45	56.41
45.71	15.93
55.17	9.96
66	22.5
69.15	36.73
39.47	38.42
90.47	11.32
84	-23.4
32.63	-9.07
83.33	22.34
87.16	31.51
12.24	32
53.93	72.72
80.45	60.71
31.91	14.89
57.14	63.63
59.57	17.07
32.79	25
36.36	26.09
63.64	50.67
49.67	33.33
45.9	52.05
32	25
53.75	75
56.66	23.2
53.84	13.38
64.21	15.56
27.45	24.44
30.95	20
79.88	29.6
69.07	18.13
27.5	67.66
73.44	84.6
32.43	48.1
46.43	18.92
88.89	20.25
68.26	18.75
58.69	36.43
22.73	87.28
27.18	63.11
72.63	18.33
-32.45	20
37.62	15.84
27.71	86.15
68.18	15.91
70.73	27.27
61.66	20
12.28	13.48
46.48	23.08
73.68	29.41
37.84	16.3
25.64	47.86
51.02	26.21
42.86	14.1
57.5	11.29
70.85	24.49
13.64	42.86
67.86	44.83
59.87	18.75
29.52	23.76
41.18	23.3
40.98	15.89
16.47	56.86
52.46	18.6
71.11	59.29
75.55	18.12
28.57	30.14
84.3	17.95
52.05	23.08
80.35	18.64
17.07	20.41
45.86	12.82
62.29	63.63
46.31	18.18
48.15	47.31
43.33	11.36
60.71	15.79
60.48	22.5
52.75	21.43
49.06	26.2
15.29	15.15
46.27	20
37.84	31.82
40.76	25
30.91	15.28
30	23.13
24.59	38.65
53.79	20.2
83.87	54.43
80	12.16
18.15	13.73
34.42	10.42
62.5	17.65
71.42	24.32
69.35	36
14.68	37.5
44.23	13.56
56	26
14.94	9.09
77.6	43.62
39.06	10.6
79.31	29.2
44.83	16.37
47.62	19.73
79.49	19.4
30.54	58.8
72.73	16.88
41.66	18.75
45.06	75
13.04	12.5
48.15	51.75
7.76	21.13
78.44	50
48.42	46.15
87.5	7.88
81.59	68.67
32.14	11.34
34.39	29.27
81.84	31.43
50	77.77
64.46	61.53
52.78	15.44
50	16.81
50.39	66.66
48.84	33.93
69.16	34.15
75.47	31.34
57.5	10.87
34.21	14.63
64.88	71.42
50.91	26.03
72.66	18.01
69.84	17.57
55.71	46.66
55	13.16
50	23.08
54.96	15.22
56.52	24.24
55.27	33.33
13.97	15.71
42.5	59.09
42.5	62.96
86.67	38.98
43.24	47.22
48.15	67.74
29.73	25.33
60	32
85.71	38.46
54.54	60
91.66	18
81.81	51.85
76.92	40
36.11	23.4
89.74	67.26
43.18	44.23
66.67	28.82
29.13	-39.33
78.12	28.36
18.42	11.54
70.58	25.83
60	15.79
56.76	24.21
62.5	18.52
18.75	11.59
32.76	17.07
50	24.07
59.46	19.7
40	14.29
48.94	12.7
64.71	28.07
67.81	47.37
59.93	46.43
88.23	26.61
28.43	53.84
42.42	12.5
34.04	33.33
39.62	28.57
61.8	22.22
64.58	11.29
65.22	12
44.23	12.5
22.95	14.35
69.86	11.69
73.6	60.16
25.93	33.33
83.82	20.87
27.78	65
30.58	40.74
26.67	36.36
64.42	38.38
67.8	50
43.05	5.56
57.95	84.11
18	19.72
62.77	42.1
22.5	72.25
34.85	41.38
58.9	17.86
87.5	21.74
17.86	35.34
77.05	35.36
21.33	45.57
78.79	6.54
59.17	27.5
61.33	22.81
34.61	21.13
85.55	72.08
50	49.67
38.23	30.3
35	16.67
33.67	18.75
42.37	15
38.09	16.33
34.09	10.56
42.19	17.65
68.79	40
46.27	64.8
28.93	38.23
45.45	47.06
38.82	34.78
48.36	16.67
65.51	63.35
73.13	26.48
80.72	27.11
15.64	66.56
46.94	11.76
12.5	41.3
39.28	12.5
70	20.56
44.96	71.04
36.64	20.62
86.04	16.42
17.05	34.09
47.3	23.46
30	37.93
37.04	20.83
55.34	10.97
51.11	21
60	52.1
72	47.83
37.78	21.9
24.14	7.32
17.78	34.84
27.97	55.44
64.38	17.37
68.42	42.24
68.75	32.07
60.53	16.28
30.15	85.71
49.31	25.49
27.86	45
47.52	56.9
55.17	13.04
64.65	18.29
58.82	64.49
31.82	40
28.7	64.28
52.63	22.95
54.01	19.33
57.28	26.06
44.9	39.13
91.1	52.94
47.06	29.54
15.42	58.72
13.33	66.66
17.31	26.32
37.04	54.54
40	29.03
53.7	45.26
18.39	23.08
13.89	23.44
87.93	46.48
15.38	52.94
36.69	10.94
20.5	44.64
77.35	18.75
26.51	12.5
14.75	23.68
61.9	63.83
31.71	28.17
57.91	50
64.71	31.84
35.71	6.52
39.34	31.67
53.33	48.28
73.91	56.41
67.8	16.39
73.58	21.39
32.67	37.41
23.97	18.31
31.82	26.09
36.67	27
32.76	50
48.39	40.91
20.93	34.09
29.69	19.7
33.33	22.06
16.39	21
78.33	29.65
71.87	23.53
34.28	13.73
46.63	57.69
80.64	54.54
75.98	23.88
42.5	19.28
47.73	21.71
60	60.67
37.24	23.21
15.89	15.38
32.14	35.29
65.11	45
66.67	23.33
82.46	38.89
17.19	57.14
45.12	33.33
33.33	62.5
62.5	36.76
10.14	58.92
73.44	31.54
61.11	47.83
76.19	54.41
41.27	25.41
37.5	20
32.47	30.86
64.84	36.36
33.33	35.55
51.61	38.09
65.38	50.76
60	4.33
19.72	13.3
87.62	10.29
20.62	27.34
16.36	27.27
61.9	17.61
31.52	48.34
45.79	17.57
6.54	35
81.92	21.05
68.75	17.78
55.92	53.33
30.77	18.87
29.31	31.52
89.16	8.51
90.64	41.72
86.23	25.58
84.65	14.97
57.49	28.36
68	34.37
57.95	28.57
19.05	50
30.34	26.35
35	16.51
84.94	12.09
56.6	26.39
40.33	12
81.28	48.15
65	33.33
41.3	37.5
68.21	66.66
67.18	42.85
78.31	16.88
51.69	10.81
51.48	19.35
66.87	17.14
89.74	18.81
45.83	20.14
53.84	16.36
44.94	28.2
62.71	20.55
53.33	50.54
58.82	17.39
52.38	37.14
47.3	34.21
53.05	25
63.32	30.48
47.92	69.4
32.19	23.08
29.09	43.43
47.21	58.82
67.43	11.59
63.89	31.75
40	21.95
43.33	21.21
35.29	16.88
58.06	20.31
52.04	35.71
29.65	20.99
32.26	32.43
74.36	18.81
62.96	22.15
50	14.11
27.03	39.93
37.5	24.58
79.1	6.94
32.86	18.31
13.25	44.12
18.18	33.78
59.09	17.58
11.27	11.33
55	25.58
82.73	53
30.3	25.55
45.33	44.34
58.22	18.84
34.21	17.72
54.44	24.26
72.49	28.91
39.67	30.64
67.74	13.08
58.9	24.14
41.51	7.94
43.33	23.08
75.36	-1.92
27.94	69.23
28.57	13.53
38.63	23.53
27.27	19.01
32.43	43.88
46.15	29.17
26.67	19.43
67.12	27.45
55.97	44.44
18.95	76.47
47.82	19.05
23.81	66.66
46.15	22.09
42.42	13.33
84.12	10
41.76	19.74
43.41	31.71
13.4	28.04
45.26	22.64
64.65	28.95
25	34.48
40.66	40
74.48	15.86
50.41	87.5
57.5	15.09
46.81	18.08
47.83	30.77
35.97	18.75
15.6	9.52
46.15	23.19
45.74	17.93
80.03	83.59
1.24	33.33
75.39	20.41
14.84	37.78
27.76	35.66
14.18	18.07
47.62	13.11
63.63	24.39
59.68	24.16
24.74	7.35
59.85	24.36
53.19	12.99
41.66	22.28
25.49	32.56
70.6	33.33
28.57	15.94
40.68	22.81
18.88	63.04
33.33	29.41
79.24	26.92
30.97	18.11
20.59	16.48
31.65	36.49
17.39	23.12
74.5	43.1
24.32	70
10.42	22.45
10.96	24.77
44.04	12.28
76.64	12.79
71.86	14.1
66.98	53.06
60.85	15.79
78.87	32
83.33	30.95
51.28	17.1
44.5	54.54
42.13	19.44
41.38	76.19
72.54	27.27
40	23.15
43.2	18.97
45	17.44
54.7	16.67
32	42.85
30.77	33.33
55.79	17.44
68.57	9.9
71.43	18
22.73	14.86
51.92	14.75
16	37.9
13.93	17.74
24.61	16.22
16.03	41.67
21.07	27.62
24.76	60.24
26.19	44.59
29.6	24.42
14.39	43.92
71.36	30.77
55.37	46.66
9.85	66.67
12.68	15.38
17.21	35.37
64.62	15.38
14.05	29.54
80.86	71.43
65.58	52.5
69.42	16.46
25	77.27
4.12	18.46
37.29	55.55
46.13	25.36
81.27	19.81
76.94	81.45
30.52	63.63
42.86	27.85
67.14	26.32
81.42	36.96
48.84	56.25
53.68	60.87
70.2	25.87
40.54	16.55
6.52	26.55
30.19	27.55
27.27	35.21
16.28	39.63
20	33.99
24.14	23.87
65.73	73.01
50.91	17.76
71.27	18.84
41.18	68.64
25	38.89
35.43	15
37.7	17.65
80.47	14.29
36.25	9.68
16.97	19.35
51.22	35.9
16.85	47.62
50.28	59.74
16.13	27.27
53.85	43.75
37.31	27.87
60.42	60.8
40	55
15.62	35.71
42.48	25.86
25.47	29.64
80	12.63
33.44	19.65
43.48	16.36
22.22	20.45
18.75	29.39
17.33	20.45
65.47	36.54
61.3	15.15
85.39	54.63
66.66	10.87
77.13	8.25
63.79	11.79
56.1	25.74
40.98	37.87
39.16	40.84
75.94	33.67
63.64	15.38
63.53	45.16
33.78	14.52
47.22	40.11
76.58	28.17
6.25	16.13
90.57	23.88
16.79	19.76
73.89	25.14
12.35	34.4
44.26	18.33
62.13	48.78
67.95	11.84
64.91	33.33
45.11	15.59
68.18	16.28
18.37	13.33
18.94	50.32
68.73	57.14
19.4	47.42
38.32	71.87
15.89	25.16
17.19	39.53
85.27	12.5
50.83	9.26
58.33	16.36
14.2	47.5
95.82	23.94
85.66	57.14
25.81	51.61
66.05	23.91
88.75	33.33
77.07	18.97
89.52	60.87
71.87	34.46
33.33	20.06
56.9	20.71
38.89	62.82
50	23.4
51.22	75.44
37.04	57.78
64.86	7.84
73.99	83.6
85.31	28.36
18.82	13.89
19.82	29.75
32.76	11.67
49.56	17.12
50	43.19
25.81	14.87
67.2	35.57
27.27	56.25
24.24	62.39
29.73	19
30	12.64
36.08	18.68
41.05	44.27
56.38	20.23
62.73	67.94
74.69	15.15
14.58	16.35
16.22	27.67
26	58.33
37.48	41.67
16.85	71.5
26.44	16.61
69.28	20.63
28.13	58.33
42.82	27.91
34.78	12.5
74.28	24.74
58.33	30.55
33.33	42.86
34.69	18.45
75.29	25.76
31.76	36.11
36	42.86
27.43	20
48	51.22
62.5	18.97
16.9	6.94
36.64	13.37
40.88	35.25
39.45	11.81
9.37	11.35
20.52	35.67
16.67	44.6
33.77	15.72
36.56	66.38
74.72	18.67
61.28	16.39
70.1	17.11
61.08	20
21.01	55.4
18.99	9.42
92.34	15.6
16.38	18.18
24.14	16.9
57.49	9.62
94.05	15.09
12.01	45.16
29.8	26.79
32.41	47.06
61.11	23.33
17.21	19.44
20.22	26.67
33.33	36.84
68.91	70.95
58.49	28.81
22.5	25.88
86.13	35.75
23.6	34.51
	27.59
	40
	56.52
	61.04
	24.53
	33.33
	25
	20
	16.67
	14.63
	21.48
	53.76
	11.48
	20.41
	11.96
	27.59
	26.47
	34.37
	22.14
	38.55
	14.52
	34.55
	17.44
	48.15
	26
	38.36
	24.39
	9.57
	69.05
	15.1
	69.15
	54.54
	40.54
	22.73
	37.5
	15.2
	28.22
	27.94
	20.52
	21.77
	20.57
	21.37
	39.3
	33.39
	18.1
	17.74
	21.63
	9.93
	12.82
	26.32
	26.9
	15.69
	15.38
	11.97
	13.11
	12.51
	14.49
	18.32
	26.55
	16.14
	13.21
	21.6
	29.1
	19.1
	34.72
	35.27
	13.85
	47.01
	18.87
	20.39
	50
	16.67
	60
	15.07
	32.35
	36.96
	22.84
	21.1
	34.13
	20.94
	41.23
	71.79
	57.24
	22.28
	14.29
	23.5
	23.26
	6.98
	16.44
	25.86
	23.19
	45.16
	41.18
	30.27
	10.67
	19.74
	44.83
	15.79
	16.28
	24.44
	34.94
	39.02
	56.25
	37.5
	26.92
	13.3
	16.6
	37.75
	17.24
	25.84
	25.51
	26.58
	45
	25
	14.1
	23.11
	21.25
	37.7
	10.94
	14.71
	28.2
	65
	45.45
	50
	33.93
	32.47
	27.78
	30.3
	59.86
	26
	45.55
	20.5
	16.95
	24.83
	63.55
	9.84
	12.5
	50
	60.44
	20
	29.54
	59.71
	28.62
	42.1
	22.22
	40.74
	9.52
	36.96
	26.15
	35.85
	19.12
	20.59
	20
	50
	54.54
	16.13
	23.08
	75
	20.59
	14.73
	32.05
	64.31
	91.64
	15
	13.73
	48.08
	61.29
	52.17
	52.65
	50.48
	44.66
	49.28
	11.11
	11.76
	24.72
	61.99
	72.65
	42.42
	41.1
	23.95
	16.97
	13.99
	57.58
	27.08
	18.46
	25.33
	18.75
	25.53
	25.81
	44.06
	15.07
	16.22
	25
	20.83
	34.28
	21.25
	38.23
	25
	37.29
	30.56
	58.21
	31.67
	21.05
	54.54
	39.39
	18.18
	17.86
	23.68
	19.15
	44.05
	15
	44.83
	28.57
	23.26
	18.87
	16.74
	12.43
	23.26
	60.6
	-16.67
	42.5
	38.09
	36.58
	35.47
	67.59
	9.33
	25
	23.4
	18.75
	10.53
	14.1
	60.39
	45.45
	28.38
	17.83
	13.89
	20.35
	80.61
	40.86
	53.06
	62.26
	12.28
	11.11
	21.7
	40.81
	15.23
	21.43
	16
	20
	30
	16.67
	21.74
	55.55
	53.49
	35.71
	20.6
	14.92
	26.09
	22.22
	13.33
	64.06
	27.78
	54.08
	49.52
	12.96
	11.48
	9.33
	18.28
	18.42
	18.18
	14.95
	22.46
	10.26
	15.97
	11.65
	46.99
	6.82
	10.96
	61.76
	15.61
	33.95
	33.33
	61.07
	16.94
	19.62
	8.4
	55.14
	13.73
	54.72
	26.99
	31.58
	20
	15.49
	17.59
	-28.95
	58.97
