# Supplementary material for: aCPSF1 cooperates with terminator U-tract to dictate archaeal transcription termination efficacy
Source: eLife. 2021 Dec 29;10:e70464. doi: 10.7554/eLife.70464 (PMC8716108; doi:10.7554/eLife.70464)
Supplement: Figure 2—source data 1. [file elife-70464-fig2-data1.xlsx]

## Sheet: Figure2B
Upstream Gene	S2_TTE	TRQQ
MMP0001	0.181813	0.875806
MMP0002	0.218637	0.807775
MMP0003	0.257776	0.874441
MMP0006	0.536943	0.478492
MMP0007	0.509088	0.885073
MMP0008	0.119999	0.855692
MMP0010	0.785686	0.494559
MMP0013	0.485071	0.712516
MMP0014	0.128712	0.906851
MMP0017	0.499986	0.548401
MMP0020	0.804069	0.501396
MMP0021	0.0985899	0.930488
MMP0022	0.244678	0.823987
MMP0024	0.158536	0.462873
MMP0025	0.532908	0.889806
MMP0027	0.75997	0.656903
MMP0028	0.0974021	0.896058
MMP0029	0.641301	0.586959
MMP0030	0.537027	0.49436
MMP0031	0.419341	0.598078
MMP0033	0.144443	0.883268
MMP0034	0.707788	0.356614
MMP0036	0.818171	0.325775
MMP0037	0.134327	0.871901
MMP0038	0.396944	0.63595
MMP0039	0.333321	0.931047
MMP0040	0.632344	0.742114
MMP0041	0.319987	0.729467
MMP0042	0.322577	1.04501
MMP0044	0.256753	0.875111
MMP0045	0.587529	0.581356
MMP0046	0.457361	0.665235
MMP0050	0.678893	0.407994
MMP0051	0.620595	0.727192
MMP0053	0.297869	0.752282
MMP0056	0.28235	0.916986
MMP0057	0.582414	0.575978
MMP0058	0.565824	0.741707
MMP0059	0.23867	0.740316
MMP0060	0.702265	0.631698
MMP0062	0.50997	0.704257
MMP0063	0.300904	0.772078
MMP0065	0.820844	0.414044
MMP0066	0.618924	0.65426
MMP0068	0.827558	0.271814
MMP0069	0.799395	1.0006
MMP0070	0.446799	5.61589
MMP0071	0.257139	0.742861
MMP0072	0.558807	0.55464
MMP0073	0.470768	0.66154
MMP0076	0.664733	0.922837
MMP0077	0.386789	0.789739
MMP0078	0.458324	0.787886
MMP0079	0.538009	0.602236
MMP0080	0.249995	0.78827
MMP0083	0.695254	0.616834
MMP0086	0.739114	0.62972
MMP0087	0.495408	0.738424
MMP0089	0.272719	1.21509
MMP0091	0.394936	0.869174
MMP0092	0.260354	0.864739
MMP0093	0.620802	0.610536
MMP0094	0.227845	0.862372
MMP0095	0.456784	0.671977
MMP0096	0.202529	0.965743
MMP0098	0.795532	0.545722
MMP0100	0.677774	0.492814
MMP0102	0.769201	0.430811
MMP0103	-1.0773	1.38446
MMP0104	0.533316	0.521883
MMP0105	0.569851	0.554716
MMP0107	0.647021	0.492311
MMP0108	0.736803	0.440852
MMP0110	0.407392	0.644138
MMP0112	0.565193	0.496921
MMP0115	0.422217	0.692194
MMP0116	0.174601	1.11863
MMP0123	0.692881	0.498653
MMP0125	0.553561	0.507316
MMP0127	0.835989	0.701636
MMP0128	0.428551	0.897968
MMP0130	0.673064	0.418475
MMP0132	0.406976	0.491889
MMP0133	0.613332	0.7052
MMP0134	0.417265	1.34849
MMP0135	0.159573	0.932873
MMP0136	0.781817	0.423084
MMP0137	0.536224	0.752539
MMP0139	0.742836	0.531135
MMP0141	0.746148	0.534422
MMP0144	0.666648	0.702779
MMP0148	0.604648	0.461243
MMP0150	0.592045	0.789059
MMP0151	0.223877	0.853056
MMP0152	0.611103	0.54982
MMP0153	0.666651	0.339843
MMP0155	0.438596	0.685223
MMP0156	0.128787	0.927608
MMP0157	0.0769228	1.00673
MMP0158	0.666982	0.712821
MMP0159	0.133332	0.930201
MMP0162	0.429748	0.718093
MMP0163	0.545698	0.602593
MMP0164	0.403819	0.942423
MMP0170	0.249992	0.787507
MMP0173	0.166665	0.908241
MMP0174	0.449989	0.725546
MMP0176	0.425924	0.865396
MMP0178	0.999857	0.14298
MMP0180	0.504757	0.775159
MMP0181	0.687499	0.646237
MMP0182	0.616817	0.47086
MMP0183	0.425618	0.71139
MMP0186	0.277774	0.751825
MMP0187	0.240961	0.986749
MMP0188	0.327772	0.852523
MMP0189	0.842687	0.276254
MMP0190	0.413779	0.778256
MMP0192	0.730741	0.911579
MMP0194	0.319999	0.82861
MMP0204	0.809516	0.299753
MMP0205	0.499996	0.73418
MMP0209	0.424229	0.712852
MMP0210	0.44826	0.620698
MMP0212	0.671293	0.61906
MMP0214	0.359986	0.975244
MMP0215	0.506166	0.570462
MMP0219	0.737366	0.462546
MMP0220	0.606042	0.476895
MMP0221	0.813248	0.333123
MMP0222	0.333323	0.681828
MMP0224	0.579205	0.58478
MMP0227	0.392149	1.44849
MMP0228	0.160713	0.831059
MMP0229	0.617183	0.596029
MMP0230	0.527763	0.587102
MMP0233	0.351342	0.810819
MMP0234	0.568279	0.538622
MMP0235	0.739556	0.435919
MMP0237	0.520822	0.715187
MMP0239	0.333311	0.875648
MMP0241	0.431692	0.702266
MMP0245	0.790591	0.551608
MMP0247	0.470575	0.548677
MMP0248	0.29268	0.900801
MMP0249	0.679557	0.543226
MMP0250	0.295998	0.907919
MMP0252	0.489681	1.12172
MMP0254	0.279989	0.755422
MMP0256	0.209999	0.87587
MMP0258	0.643009	0.595272
MMP0259	0.0967735	0.915829
MMP0260	0.167938	0.885611
MMP0261	0.50769	0.780903
MMP0263	0.531233	1.15515
MMP0264	0.691349	0.466561
MMP0266	0.536572	0.729646
MMP0270	0.370364	0.787036
MMP0274	0.494732	0.891639
MMP0276	0.536572	0.635553
MMP0277	0.65624	0.436666
MMP0278	0.212115	0.964477
MMP0280	0.49339	0.641016
MMP0281	0.199997	0.872729
MMP0282	0.450545	0.594178
MMP0283	0.256753	0.782624
MMP0284	0.278684	0.759567
MMP0285	0.202796	0.782532
MMP0286	0.189184	0.917904
MMP0287	0.551715	0.490642
MMP0289	0.58503	0.726194
MMP0290	0.265957	0.796105
MMP0291	0.426055	0.840821
MMP0292	0.314605	0.818945
MMP0294	0.361501	0.772676
MMP0295	0.641973	0.440248
MMP0297	0.702527	0.46984
MMP0298	0.298291	1.0128
MMP0300	0.208325	0.82686
MMP0301	0.673898	0.639147
MMP0302	0.203735	0.892081
MMP0303	0.314847	0.792627
MMP0309	0.771572	0.440622
MMP0311	0.161285	1.01178
MMP0313	0.619466	0.503413
MMP0317	0.740241	0.658579
MMP0318	0.417807	0.913148
MMP0319	0.434764	0.526256
MMP0321	0.333315	0.843558
MMP0322	0.299998	0.810001
MMP0325	0.714857	0.566763
MMP0326	0.610682	0.532329
MMP0327	0.499994	0.715522
MMP0329	0.2941	0.745856
MMP0330	0.378782	0.797507
MMP0331	0.215381	1.05849
MMP0333	0.399997	0.655674
MMP0335	0.640844	0.587942
MMP0339	0.808403	0.553369
MMP0341	0.916728	0.222997
MMP0343	0.447357	0.773698
MMP0344	0.769228	0.650188
MMP0345	0.642811	0.544279
MMP0346	0.880425	0.40521
MMP0347	0.607121	0.6786
MMP0348	0.736357	0.589301
MMP0349	0.766641	0.305159
MMP0350	0.354827	1.01382
MMP0351	0.705841	0.735343
MMP0353	0.439991	0.758715
MMP0354	0.205877	0.871977
MMP0355	0.521728	0.717405
MMP0359	0.230765	0.946748
MMP0360	0.153843	0.885512
MMP0363	0.242417	0.841755
MMP0366	0.466636	0.617575
MMP0369	0.864963	0.505645
MMP0370	0.682537	0.578234
MMP0372	0.865601	0.43278
MMP0373	0.702827	0.584579
MMP0375	0.212961	2.30601
MMP0382	0.575335	0.535443
MMP0383	0.824587	0.489944
MMP0384	0.714273	0.426534
MMP0385	0.436356	0.657584
MMP0386	0.774187	0.544289
MMP0387	0.319837	0.723057
MMP0388	0.221052	1.06523
MMP0391	0.55963	0.695389
MMP0392	0.777691	0.222309
MMP0393	0.459995	0.673338
MMP0394	0.358204	0.966969
MMP0396	0.441526	0.738865
MMP0397	0.708328	0.517367
MMP0399	0.838683	0.305828
MMP0400	0.770365	0.43171
MMP0401	0.32352	0.727534
MMP0402	0.614277	0.6719
MMP0405	0.600466	0.510634
MMP0406	0.118881	0.896311
MMP0407	0.568061	0.840768
MMP0408	0.461527	0.601819
MMP0409	0.249994	1.01087
MMP0411	0.384601	0.709592
MMP0413	0.499991	1.24666
MMP0414	0.666663	0.22586
MMP0415	0.266661	0.733339
MMP0418	0.564507	0.544362
MMP0419	0.790959	0.392895
MMP0420	0.509082	0.962193
MMP0421	0.244893	1.0333
MMP0422	0.506323	0.655241
MMP0423	0.363628	1.03195
MMP0424	0.421042	0.614404
MMP0426	0.145831	0.788465
MMP0427	0.719619	0.523375
MMP0428	0.599992	0.608459
MMP0429	0.563105	0.586548
MMP0430	0.434776	0.840856
MMP0431	0.613629	0.507955
MMP0433	0.232756	0.86528
MMP0434	0.639093	0.836927
MMP0439	0.144577	0.893868
MMP0440	0.47321	0.609879
MMP0441	0.578613	0.566866
MMP0442	0.220993	1.03729
MMP0444	0.539311	0.592222
MMP0447	0.729673	0.616534
MMP0452	0.628565	0.560938
MMP0455	0.299992	0.763642
MMP0457	0.667424	0.528261
MMP0458	0.500599	2.04941
MMP0459	0.879278	0.171228
MMP0464	0.41174	0.882371
MMP0476	0.428564	0.740499
MMP0480	0.314431	0.767729
MMP0482	0.413786	0.909637
MMP0487	0.571388	0.696462
MMP0489	0.630128	0.625253
MMP0490	0.454532	0.681833
MMP0493	0.45713	0.972625
MMP0496	0.551705	0.586221
MMP0498	0.659993	0.480007
MMP0500	0.691482	0.719868
MMP0502	0.394727	0.780482
MMP0511	0.90474	0.122473
MMP0514	0.839966	0.248931
MMP0516	0.326312	0.890634
MMP0519	0.833264	0.18526
MMP0524	0.871552	1.15569
MMP0526	0.122447	0.987247
MMP0528	0.539264	0.510181
MMP0529	0.804485	1.44521
MMP0531	0.319142	0.960177
MMP0532	0.571417	0.544413
MMP0533	0.595732	0.556694
MMP0534	0.327863	0.769418
MMP0536	0.36362	0.727285
MMP0538	0.636354	0.613649
MMP0539	0.496685	0.754969
MMP0540	0.459009	0.621408
MMP0541	0.319993	0.961622
MMP0542	0.537493	0.836311
MMP0543	0.566648	0.4802
MMP0544	0.53842	0.626426
MMP0545	0.642099	0.586012
MMP0546	0.274504	0.779055
MMP0549	0.30952	0.835612
MMP0550	0.798812	0.603552
MMP0553	0.690715	0.455039
MMP0555	0.274993	0.8103
MMP0559	0.734437	0.555943
MMP0561	0.32432	0.900903
MMP0562	0.464269	0.679964
MMP0563	0.888864	0.222259
MMP0566	0.682631	0.656374
MMP0572	0.586877	0.717849
MMP0573	0.227269	0.777146
MMP0574	0.271787	0.8367
MMP0575	0.726303	0.836179
MMP0576	-0.324528	1.25542
MMP0577	0.376236	0.788474
MMP0578	0.277105	0.765142
MMP0581	0.681787	0.357987
MMP0584	0.707308	0.643916
MMP0585	0.616632	0.497593
MMP0589	0.122805	0.862575
MMP0590	0.464782	0.631436
MMP0591	0.73684	0.479879
MMP0592	0.378368	0.677134
MMP0596	0.256407	1.22126
MMP0597	0.510202	0.628539
MMP0598	0.428556	0.674716
MMP0600	0.574993	0.655594
MMP0601	0.708501	0.67886
MMP0603	0.136362	0.90643
MMP0604	0.67862	0.571067
MMP0605	0.598744	0.564414
MMP0606	0.295179	0.772406
MMP0608	0.411757	0.686282
MMP0610	0.409829	0.65028
MMP0611	0.164705	0.901587
MMP0613	0.524582	0.589514
MMP0614	0.711063	1.27771
MMP0615	0.755503	0.769475
MMP0617	0.285704	0.88572
MMP0620	0.843009	0.331899
MMP0624	0.520547	0.758529
MMP0625	0.803534	0.59967
MMP0626	0.17073	0.861088
MMP0627	0.458643	0.698479
MMP0628	0.622941	0.443956
MMP0629	0.463082	0.756068
MMP0630	0.481475	0.667524
MMP0631	0.433329	0.719234
MMP0632	0.607121	0.511654
MMP0633	0.60475	0.688578
MMP0636	0.52747	0.711334
MMP0637	0.490557	0.815107
MMP0638	0.152939	1.11706
MMP0639	0.462717	1.01232
MMP0642	0.378368	0.754834
MMP0643	0.407581	0.879465
MMP0644	0.309089	0.925326
MMP0646	0.299998	0.833709
MMP0647	0.245898	0.793276
MMP0651	0.537875	0.345055
MMP0654	0.838672	0.503081
MMP0655	0.799973	0.280036
MMP0656	0.181517	1.41991
MMP0657	0.34424	0.803931
MMP0658	0.624993	0.424536
MMP0660	0.714235	0.326586
MMP0664	0.693537	0.346005
MMP0665	0.146788	0.919573
MMP0666	0.442306	0.765206
MMP0667	0.559993	0.943879
MMP0668	0.149423	1.00021
MMP0669	0.776011	0.655927
MMP0670	0.390619	1.55379
MMP0671	0.793076	0.517306
MMP0672	0.44826	0.659922
MMP0674	0.476179	0.595247
MMP0676	0.794851	0.304302
MMP0679	0.305387	0.921697
MMP0680	0.727267	0.599336
MMP0681	0.416649	1.44754
MMP0682	0.450591	0.626745
MMP0683	0.130433	0.644413
MMP0684	0.48148	0.783904
MMP0685	0.0775861	0.958236
MMP0686	0.784426	0.226089
MMP0687	0.484176	0.6547
MMP0689	0.874995	0.303842
MMP0692	0.815898	0.558965
MMP0693	0.321423	0.919199
MMP0694	0.343913	0.656087
MMP0695	0.818401	0.288939
MMP0696	0.499979	0.578967
MMP0698	0.644623	0.507109
MMP0701	0.527763	0.92519
MMP0702	0.49999	0.631216
MMP0704	0.503936	0.804311
MMP0706	0.488361	0.623557
MMP0708	0.691582	0.500008
MMP0709	0.754716	0.527444
MMP0712	0.574986	0.454325
MMP0714	0.342096	1.1016
MMP0716	0.648777	0.625895
MMP0718	0.509137	0.578778
MMP0719	0.726561	0.569663
MMP0720	0.698402	0.460774
MMP0723	0.557135	0.69965
MMP0727	0.549986	0.594656
MMP0729	0.499969	0.970621
MMP0734	0.549614	0.60051
MMP0735	0.565213	0.530777
MMP0737	0.552687	0.617178
MMP0738	0.139738	0.879977
MMP0739	0.424989	0.784086
MMP0756	0.424989	0.622926
MMP0760	0.866652	0.198218
MMP0761	0.432421	0.896161
MMP0770	0.481472	0.933322
MMP0785	0.297289	0.819826
MMP0788	0.59998	1.34995
MMP0790	0.857082	0.342964
MMP0792	0.545405	0.561552
MMP0798	0.91659	0.138998
MMP0799	0.818145	0.727372
MMP0809	0.769221	0.456058
MMP0811	0.361101	0.696979
MMP0812	0.897413	0.279255
MMP0814	0.431808	1.67746
MMP0816	0.666652	0.691375
MMP0826	0.291337	0.805108
MMP0827	0.781226	0.382835
MMP0839	0.184208	0.864063
MMP0841	0.705841	0.69189
MMP0843	0.599983	0.482776
MMP0844	0.567552	0.587352
MMP0846	0.62498	0.575027
MMP0850	0.187494	0.812506
MMP0851	0.327581	0.77859
MMP0855	0.499979	0.74999
MMP0859	0.594579	0.608107
MMP0860	0.399987	0.82499
MMP0862	0.489351	0.582369
MMP0865	0.647051	0.581214
MMP0866	0.678082	0.551132
MMP0867	0.599301	0.789201
MMP0870	0.882301	0.18308
MMP0872	0.284311	0.894609
MMP0874	0.424241	0.799187
MMP0875	0.340418	0.87064
MMP0876	0.396219	0.776284
MMP0878	0.617975	0.731633
MMP0879	0.64583	0.495837
MMP0881	0.65216	0.417406
MMP0883	0.442305	0.651387
MMP0886	0.229504	0.770496
MMP0887	0.698621	0.703217
MMP0888	0.73604	0.591024
MMP0889	0.259256	0.910055
MMP0890	0.838223	2.06708
MMP0891	0.277773	0.834295
MMP0894	0.305803	0.984676
MMP0895	0.266658	0.88417
MMP0897	0.644225	0.380988
MMP0898	0.67796	0.847469
MMP0901	0.43055	0.610287
MMP0902	0.579539	0.517898
MMP0904	0.179999	0.924961
MMP0908	0.627653	0.431922
MMP0909	0.224998	0.929121
MMP0910	0.348479	0.787884
MMP0911	0.589033	0.630333
MMP0912	0.874982	0.205384
MMP0915	0.178571	0.897717
MMP0916	0.770491	0.553162
MMP0917	0.213269	0.881001
MMP0919	0.787867	0.405655
MMP0920	0.591662	0.526641
MMP0923	0.613325	0.493627
MMP0929	0.346147	0.73263
MMP0931	0.855546	0.253769
MMP0933	0.499958	0.761254
MMP0934	0.382342	0.834978
MMP0937	0.349997	0.789288
MMP0938	0.336731	0.843716
MMP0939	0.423721	0.694488
MMP0942	0.380934	0.663283
MMP0946	0.340908	0.756265
MMP0947	0.421868	0.603266
MMP0948	0.687896	0.510864
MMP0949	0.46268	1.70855
MMP0952	0.289346	1.01491
MMP0954	0.454525	0.616621
MMP0955	0.388233	1.0316
MMP0956	0.483603	0.635933
MMP0959	0.65515	0.535746
MMP0961	0.731332	0.508398
MMP0963	0.807173	0.441952
MMP0964	0.156378	0.88286
MMP0965	0.469387	0.761685
MMP0966	0.124998	0.945001
MMP0967	0.392843	0.7105
MMP0969	0.699995	0.438467
MMP0971	0.449578	0.716253
MMP0972	0.366409	0.742987
MMP0975	0.860445	0.318957
MMP0978	0.170542	0.829458
MMP0979	0.472967	0.616739
MMP0985	0.29999	0.673088
MMP0986	0.370357	1.13334
MMP0989	0.553393	0.656374
MMP0992	0.511139	0.970977
MMP0997	0.59998	0.480021
MMP0998	0.719993	0.56001
MMP0999	0.377769	0.753223
MMP1001	0.241375	0.758625
MMP1002	0.177774	1.01955
MMP1009	0.279659	0.943894
MMP1011	0.643827	0.593611
MMP1012	0.684193	0.500013
MMP1013	0.687493	0.422802
MMP1014	0.605258	0.826105
MMP1015	0.301526	0.91119
MMP1016	0.493112	0.808863
MMP1017	0.278625	0.923974
MMP1018	0.475243	0.671
MMP1019	0.551705	0.587761
MMP1021	0.646546	0.55057
MMP1024	0.588201	0.735833
MMP1026	0.318177	0.746758
MMP1029	0.287034	0.774855
MMP1030	0.526312	0.646326
MMP1031	0.540144	0.609402
MMP1032	0.57281	0.649501
MMP1033	0.448971	0.839061
MMP1036	0.911013	0.252281
MMP1037	0.470561	0.824532
MMP1038	0.154205	1.09307
MMP1039	0.133332	0.899747
MMP1040	0.173075	0.891027
MMP1041	0.370368	0.839508
MMP1043	0.399995	0.970592
MMP1044	0.537032	0.615259
MMP1045	0.183906	0.987541
MMP1046	0.138887	0.892088
MMP1047	0.879331	0.409894
MMP1048	0.153843	0.945122
MMP1049	0.366924	0.803198
MMP1050	0.20502	0.898775
MMP1053	0.773532	0.681709
MMP1056	0.265057	0.774314
MMP1057	0.147539	0.897327
MMP1060	0.619018	0.501286
MMP1062	0.317065	0.935864
MMP1063	0.579063	1.23155
MMP1064	0.647057	0.484841
MMP1066	0.357138	0.664654
MMP1067	0.393436	0.743988
MMP1068	0.533316	0.876788
MMP1069	0.73912	0.485597
MMP1070	0.677955	0.782099
MMP1071	0.735835	0.344212
MMP1074	0.326665	0.748795
MMP1075	0.239724	1.0137
MMP1076	0.318168	0.903423
MMP1077	0.366654	0.727672
MMP1080	0.327581	0.697323
MMP1082	0.483855	0.805682
MMP1083	0.209297	0.889539
MMP1084	0.29687	0.780033
MMP1085	0.333315	0.77553
MMP1088	0.163932	0.86951
MMP1090	0.78332	0.463238
MMP1091	0.718739	0.353378
MMP1092	0.342847	0.811772
MMP1094	0.466274	1.03936
MMP1095	0.806439	1.74128
MMP1100	0.759767	0.391739
MMP1101	0.424995	0.625004
MMP1103	0.477262	1.04546
MMP1104	0.599988	0.533346
MMP1106	0.372447	0.704083
MMP1107	0.158939	0.919721
MMP1109	0.321417	1.1798
MMP1110	0.651148	0.829697
MMP1113	0.666659	0.47223
MMP1116	0.824624	0.373626
MMP1117	0.171945	1.00651
MMP1118	0.451217	0.723755
MMP1119	0.333321	1.17392
MMP1120	0.624995	0.41282
MMP1121	0.101447	0.898553
MMP1122	0.734364	0.525301
MMP1124	0.611094	0.628214
MMP1126	0.761887	0.337325
MMP1127	0.412692	0.766415
MMP1128	0.374992	1.02605
MMP1129	0.324673	0.832545
MMP1131	0.648432	0.448748
MMP1132	0.333315	0.748558
MMP1133	0.516112	0.693131
MMP1134	0.653834	0.628041
MMP1136	0.599996	0.488892
MMP1137	0.19718	0.866534
MMP1139	0.876182	0.336071
MMP1140	0.206184	0.861374
MMP1142	0.163633	0.937132
MMP1143	0.619038	0.612034
MMP1146	0.315216	0.811456
MMP1147	0.457873	0.794599
MMP1148	0.0654197	1.00177
MMP1149	0.819181	0.491663
MMP1152	0.687491	0.711552
MMP1153	0.559207	0.596904
MMP1154	0.307681	0.692319
MMP1155	0.293098	0.73341
MMP1156	0.891556	0.459581
MMP1158	0.906443	0.523686
MMP1160	0.862294	0.282047
MMP1161	0.846542	0.352326
MMP1163	0.574876	0.720051
MMP1164	0.679973	0.811912
MMP1167	0.579539	1.09477
MMP1168	0.190472	0.964289
MMP1169	0.303367	0.790409
MMP1172	0.349982	0.668073
MMP1174	0.849386	0.5235
MMP1175	0.566027	0.559593
MMP1177	0.403314	0.750447
MMP1178	0.812774	0.461167
MMP1180	0.649968	0.545048
MMP1181	0.413035	0.648748
MMP1183	0.682137	0.398232
MMP1186	0.671777	0.459801
MMP1188	0.783066	0.539354
MMP1189	0.516945	0.621932
MMP1190	0.514849	0.618564
MMP1191	0.668741	0.824336
MMP1194	0.897413	0.253038
MMP1196	0.458324	0.682977
MMP1197	0.53842	0.807748
MMP1198	0.449433	0.76232
MMP1199	0.627108	0.406791
MMP1200	0.533331	1.00625
MMP1201	0.588218	0.494137
MMP1204	0.523797	0.592033
MMP1206	0.473	0.902037
MMP1207	0.530526	0.750501
MMP1208	0.633176	0.509877
MMP1209	0.479157	0.695381
MMP1210	0.321917	0.850509
MMP1211	0.290906	0.987509
MMP1212	0.472101	0.852386
MMP1213	0.674319	0.642246
MMP1215	0.638871	0.459299
MMP1216	0.39999	0.909244
MMP1217	0.433326	0.600404
MMP1220	0.352934	0.796387
MMP1221	0.580626	0.479282
MMP1222	0.520421	0.679979
MMP1224	0.296482	0.863408
MMP1225	0.32257	0.687248
MMP1229	0.743571	0.331845
MMP1230	0.629606	0.38274
MMP1231	0.499992	0.757151
MMP1233	0.270263	0.912156
MMP1235	0.374984	0.733709
MMP1237	0.791033	0.388675
MMP1241	0.328569	0.944198
MMP1242	0.13253	0.899014
MMP1245	0.18181	0.791798
MMP1246	0.590882	0.869361
MMP1247	0.112674	0.982395
MMP1248	0.549986	0.618765
MMP1249	0.827319	0.524559
MMP1251	0.303021	0.88147
MMP1252	0.453331	0.735365
MMP1255	0.582157	0.644286
MMP1257	0.342096	0.700349
MMP1259	0.544376	0.635244
MMP1260	0.724876	0.706613
MMP1261	0.396737	0.819355
MMP1265	0.677398	0.436455
MMP1270	0.589033	0.652181
MMP1271	0.415092	0.712645
MMP1273	0.433319	0.944458
MMP1274	0.753621	0.447269
MMP1276	0.279408	0.779415
MMP1277	0.285709	1.11111
MMP1280	0.386307	1.32872
MMP1281	0.272725	0.854547
MMP1282	0.32432	0.81428
MMP1284	0.461521	0.796001
MMP1286	0.266661	0.853338
MMP1287	0.671224	0.361653
MMP1289	0.559721	0.494279
MMP1290	0.189472	0.908182
MMP1292	0.47824	0.52176
MMP1293	0.238084	0.929162
MMP1294	0.461521	0.632123
MMP1295	0.424229	0.630603
MMP1297	0.841154	0.522983
MMP1298	0.417644	1.12447
MMP1299	0.434147	1.02724
MMP1300	0.133986	0.883285
MMP1301	0.452623	0.989995
MMP1302	0.64652	0.616723
MMP1303	0.249996	0.814908
MMP1306	0.406591	0.915321
MMP1308	0.744768	0.724886
MMP1310	0.504128	0.966809
MMP1314	0.574995	0.688101
MMP1315	0.468075	0.775084
MMP1318	0.478256	0.636703
MMP1319	0.359724	0.859231
MMP1321	0.155999	0.943798
MMP1322	0.461536	0.69731
MMP1324	0.457361	0.800392
MMP1325	0.800319	0.354588
MMP1326	0.0123964	1.01404
MMP1327	0.753941	0.451464
MMP1328	0.148436	0.870808
MMP1329	0.277566	0.894136
MMP1330	0.141777	0.914512
MMP1331	0.476168	0.620837
MMP1332	0.636335	0.400031
MMP1333	0.596765	3.04725
MMP1334	0.247421	0.77408
MMP1337	0.59848	0.646511
MMP1338	0.531904	0.73557
MMP1343	0.416649	0.696098
MMP1345	0.254897	0.806295
MMP1347	0.705983	0.697455
MMP1348	0.285701	0.758942
MMP1349	0.406773	0.815683
MMP1352	0.188775	0.832296
MMP1356	0.333329	0.738356
MMP1358	0.792445	0.365094
MMP1360	0.309732	0.737497
MMP1361	0.205877	0.931269
MMP1362	0.316452	0.828667
MMP1363	0.173909	0.871232
MMP1364	0.745041	0.617784
MMP1365	0.243241	0.982916
MMP1366	0.104166	0.945788
MMP1367	0.109588	0.906728
MMP1368	0.440412	0.750911
MMP1369	0.766374	0.647846
MMP1370	0.718636	0.601892
MMP1371	0.669821	0.650897
MMP1373	0.608503	0.760662
MMP1375	0.788727	0.252932
MMP1376	0.833316	0.311432
MMP1377	0.512807	0.501956
MMP1378	0.445024	0.932828
MMP1379	0.421346	0.657985
MMP1380	0.413779	0.632019
MMP1381	0.725371	0.485542
MMP1382	0.399995	0.732207
MMP1383	0.431997	1.09912
MMP1384	0.449996	1.0353
MMP1385	0.546964	0.903337
MMP1387	0.319993	0.760006
MMP1388	0.307681	0.730081
MMP1391	0.557889	0.777726
MMP1394	0.685695	0.507709
MMP1396	0.714282	0.620881
MMP1399	0.22727	0.912169
MMP1401	0.51923	0.651169
MMP1402	0.159998	0.961155
MMP1403	0.139343	0.927466
MMP1405	0.246073	0.905295
MMP1406	0.160332	1.0906
MMP1407	0.21069	0.862272
MMP1408	0.247572	1.15571
MMP1409	0.261903	1.00774
MMP1410	0.295999	1.02454
MMP1411	0.143884	0.925718
MMP1412	0.713606	0.905769
MMP1413	0.553689	0.869732
MMP1414	0.0984843	0.91575
MMP1417	0.12676	0.890088
MMP1418	0.17213	0.810683
MMP1419	0.646223	1.05176
MMP1420	0.140495	0.86389
MMP1421	0.808611	0.598393
MMP1422	0.655796	0.595493
MMP1424	0.694213	0.495338
MMP1425	0.24999	0.772738
MMP1427	0.0412364	1.10601
MMP1428	0.372857	0.76365
MMP1429	0.46126	0.684383
MMP1432	0.812731	0.387558
MMP1433	0.769393	0.490446
MMP1435	0.305239	0.793331
MMP1436	0.428568	0.747587
MMP1437	0.671424	0.477417
MMP1438	0.814152	0.47655
MMP1439	0.488366	0.709103
MMP1441	0.536839	0.585863
MMP1442	0.702018	0.61003
MMP1445	0.405403	0.725757
MMP1447	0.0652161	1.04476
MMP1452	0.301881	0.915099
MMP1453	0.272721	0.824249
MMP1455	0.162787	0.870701
MMP1456	0.199994	0.78368
MMP1461	0.241371	1.05891
MMP1467	0.657287	0.584532
MMP1469	0.509086	0.556368
MMP1470	0.712705	0.386625
MMP1472	0.411753	0.722702
MMP1474	0.249999	0.915354
MMP1475	0.354328	0.805551
MMP1479	0.377043	0.716399
MMP1480	0.804729	0.480664
MMP1481	0.362495	0.839244
MMP1482	0.169741	1.02657
MMP1483	0.512183	0.566921
MMP1485	0.168477	0.877933
MMP1486	0.502791	0.747233
MMP1488	0.161288	0.87226
MMP1489	0.538456	0.576928
MMP1491	0.373129	0.728919
MMP1493	0.604214	0.617065
MMP1494	0.399995	1.17966
MMP1495	0.156248	0.858053
MMP1498	0.424777	0.671093
MMP1499	0.254657	1.17232
MMP1500	0.799999	0.33839
MMP1502	0.334385	0.717766
MMP1504	0.434773	0.603546
MMP1505	0.222219	0.999999
MMP1506	0.187496	0.812504
MMP1508	0.173331	0.909681
MMP1509	0.654748	0.49153
MMP1510	0.613041	0.507367
MMP1511	0.853895	0.484895
MMP1512	0.666642	0.571437
MMP1515	0.771276	0.743466
MMP1516	0.63792	0.546811
MMP1517	0.560962	0.79758
MMP1518	0.409829	0.951876
MMP1520	0.391564	0.876146
MMP1523	0.759418	0.68572
MMP1525	0.636355	0.636365
MMP1527	0.635287	0.552279
MMP1530	0.337833	0.940271
MMP1532	0.472209	0.543314
MMP1534	0.765796	0.453933
MMP1537	0.0624959	0.729193
MMP1538	0.905659	0.340778
MMP1540	0.167882	0.877097
MMP1541	0.738885	0.621862
MMP1543	0.123456	0.967329
MMP1546	0.442558	1.01224
MMP1547	0.621334	0.565939
MMP1550	0.679484	0.616989
MMP1551	0.649119	0.659773
MMP1553	0.451084	0.61899
MMP1554	0.681803	0.609424
MMP1555	0.183671	0.863789
MMP1558	0.189393	0.855392
MMP1559	0.687311	0.950904
MMP1561	0.194027	0.822255
MMP1562	0.383231	0.80356
MMP1565	0.158877	0.966395
MMP1566	0.171872	0.862996
MMP1567	0.852702	0.433715
MMP1568	0.508284	0.618058
MMP1573	0.583309	0.478883
MMP1576	0.142	0.939375
MMP1577	0.958155	0.569615
MMP1579	0.856641	0.353629
MMP1582	0.258056	0.930799
MMP1583	0.660547	0.972383
MMP1584	0.887542	0.361199
MMP1586	0.770731	0.533564
MMP1588	0.895154	0.174449
MMP1589	0.718744	0.449099
MMP1590	0.333327	0.85058
MMP1592	0.568956	0.60551
MMP1594	0.388867	0.737572
MMP1595	0.499975	0.830393
MMP1599	0.512189	0.74297
MMP1602	0.370357	0.774515
MMP1604	0.648643	0.65568
MMP1608	0.739897	0.498326
MMP1609	0.853055	0.402262
MMP1610	0.188234	0.87421
MMP1611	0.198196	0.856225
MMP1613	0.327583	0.9
MMP1615	0.495625	0.769081
MMP1617	0.499964	0.727304
MMP1619	0.258062	0.877657
MMP1621	0.672039	0.541442
MMP1622	0.272715	0.872738
MMP1626	0.242417	0.893945
MMP1627	0.297289	0.985616
MMP1628	0.299994	0.860925
MMP1629	0.360757	1.0801
MMP1630	0.410522	0.64238
MMP1632	0.563824	0.854897
MMP1633	0.627267	0.717645
MMP1635	0.746909	0.425192
MMP1636	0.145831	0.891853
MMP1637	0.162158	1.13706
MMP1639	0.259995	0.772178
MMP1640	0.374764	0.756863
MMP1642	0.168537	0.977598
MMP1643	0.264411	1.03624
MMP1644	0.692767	0.40405
MMP1646	0.281345	0.783475
MMP1647	0.428186	0.724363
MMP1648	0.347821	0.880578
MMP1652	0.742836	0.303917
MMP1653	0.583285	0.448769
MMP1655	0.333326	0.754392
MMP1656	0.346932	0.786099
MMP1658	0.752855	0.527338
MMP1659	0.317643	0.921176
MMP1661	0.359997	0.780919
MMP1662	0.274334	0.775904
MMP1664	0.479981	0.452194
MMP1671	0.624974	0.938735
MMP1678	0.169011	0.859447
MMP1679	0.366409	0.846817
MMP1681	0.408837	1.00952
MMP1683	0.394492	0.669049
MMP1684	0.0937481	0.957548
MMP1685	0.205217	0.856258
MMP1687	0.166662	0.900004
MMP1688	0.337658	0.794809
MMP1689	0.365587	0.688569
MMP1691	0.747197	0.682713
MMP1692	0.612793	0.678609
MMP1693	0.701009	0.511177
MMP1694	0.610758	0.883954
MMP1695	0.210083	0.859429
MMP1696	0.189943	0.833882
MMP1697	0.923352	0.775282
MMP1698	0.163841	0.963458
MMP1699	0.241371	0.963659
MMP1700	0.574876	0.619969
MMP1702	0.940531	0.555352
MMP1703	0.120141	0.877263
MMP1704	0.297958	0.860704
MMP1707	0.324071	0.869497
MMP1708	0.611111	0.547955
MMP1710	0.172077	0.99509
MMP1711	0.202245	0.797755
MMP1712	0.333325	0.841276
MMP1714	0.689074	1.71379
MMP1717	0.584895	0.788093
MMP1720	0.224994	0.81929
MMP1721	0.861311	0.313975

## Sheet: Figure2D
	TTS Quadruplet Read Ratio
The number of U-tracts	>2	2	1	0
	0.8557	0.1225	0.1831	0.143
	0.3929	0.139	0.2223	0.1712
	0.4612	0.1853	0.223	0.2223
	0.5812	0.2523	0.2261	0.2763
	0.6166	0.2529	0.28	0.3058
	0.6564	0.253	0.282	0.444
	0.2889	0.3043	0.3398	0.4488
	0.3052	0.3114	0.3408	0.4596
	0.4231	0.314	0.346	0.4802
	0.4317	0.3258	0.3534	0.4946
	0.4365	0.3318	0.3917	0.5102
	0.4612	0.3319	0.3982	0.5219
	0.4987	0.3331	0.4057	0.5237
	0.5031	0.3361	0.4068	0.5487
	0.5253	0.3373	0.408	0.5534
	0.5414	0.343	0.4185	0.5616
	0.5444	0.3442	0.4308	0.5696
	0.5506	0.3451	0.4319	0.6264
	0.5824	0.3523	0.4367	0.6297
	0.591	0.3536	0.4522	0.632
	0.6026	0.3546	0.4598	0.6478
	0.6165	0.3566	0.4799	0.6503
	0.6167	0.3612	0.48	0.6731
	0.6172	0.3651	0.4807	0.6818
	0.6219	0.3827	0.4828	0.6923
	0.6312	0.3828	0.4848	0.6973
	0.6462	0.3876	0.4936	0.6985
	0.6681	0.3887	0.4944	0.7043
	0.7249	0.4	0.4958	0.7105
	0.7358	0.404	0.4969	0.7164
	0.7389	0.4052	0.5	0.7181
	0.7472	0.414	0.5013	0.7227
	0.7839	0.4174	0.502	0.7277
	0.8194	0.4265	0.5073	0.7292
	0.8653	0.4328	0.5106	0.7295
	0.8768	0.4337	0.5112	0.7316
	0.8921	0.4359	0.5218	0.7333
	0.9131	0.4385	0.5263	0.7353
	0.9153	0.442	0.5357	0.7376
	0.9668	0.4473	0.5444	0.7421
	0.9867	0.4487	0.5484	0.7429
	1.0128	0.4491	0.5532	0.7459
	1.1171	0.4515	0.5554	0.7548
	1.1217	0.4539	0.5567	0.7554
	0.1744	0.4543	0.5669	0.7651
	0.1982	0.455	0.5711	0.7722
	0.2054	0.4608	0.5782	0.7727
	0.2259	0.4629	0.5845	0.7753
	0.2489	0.4632	0.5859	0.7825
	0.2538	0.4709	0.5878	0.7885
	0.2718	0.4766	0.5879	0.7892
	0.2793	0.4769	0.5893	0.7918
	0.2998	0.4774	0.5952	0.7976
	0.3038	0.4789	0.596	0.8004
	0.3039	0.4793	0.5969	0.8036
	0.319	0.4849	0.5981	0.8057
	0.3266	0.4856	0.5993	0.8077
	0.3384	0.4889	0.5997	0.8107
	0.358	0.4904	0.6005	0.8108
	0.3617	0.4906	0.6019	0.8118
	0.3736	0.4941	0.6035	0.8125
	0.381	0.4976	0.6144	0.8193
	0.3866	0.4983	0.6153	0.8223
	0.4023	0.5	0.617	0.8242
	0.4099	0.5014	0.6176	0.8339
	0.4128	0.5071	0.6188	0.8363
	0.4228	0.5074	0.619	0.8392
	0.4245	0.5077	0.6282	0.8395
	0.4252	0.508	0.6285	0.8436
	0.4402	0.5084	0.6303	0.8524
	0.4406	0.5099	0.6359	0.8554
	0.4409	0.5173	0.6424	0.8592
	0.4561	0.5179	0.6444	0.8594
	0.4593	0.5246	0.6465	0.8611
	0.4625	0.5266	0.6487	0.8623
	0.4666	0.5308	0.6509	0.8624
	0.4698	0.5311	0.6512	0.863
	0.4722	0.5323	0.6514	0.8638
	0.4785	0.5333	0.6547	0.8639
	0.48	0.5336	0.6552	0.8694
	0.4855	0.5354	0.6576	0.8695
	0.4899	0.5386	0.6598	0.8695
	0.4915	0.5433	0.6647	0.8697
	0.4917	0.5443	0.6827	0.8707
	0.4919	0.545	0.6857	0.8708
	0.4923	0.5468	0.6872	0.8719
	0.4928	0.548	0.6881	0.8758
	0.4943	0.5511	0.6931	0.8815
	0.4953	0.5516	0.6945	0.8833
	0.5034	0.5547	0.7041	0.8833
	0.5056	0.5559	0.7114	0.884
	0.5109	0.56	0.7128	0.8856
	0.5117	0.5609	0.7174	0.8901
	0.5174	0.5659	0.7178	0.891
	0.523	0.5668	0.7192	0.8963
	0.5234	0.5669	0.7231	0.8977
	0.5235	0.5697	0.7255	0.8997
	0.5273	0.5714	0.7275	0.9
	0.5274	0.575	0.7322	0.9034
	0.5283	0.576	0.7334	0.9058
	0.5344	0.5788	0.7375	0.9064
	0.5394	0.579	0.7384	0.9067
	0.5432	0.5814	0.7476	0.9079
	0.5443	0.586	0.7486	0.9082
	0.5457	0.5862	0.75	0.9097
	0.5498	0.5871	0.7509	0.9112
	0.5523	0.5874	0.7587	0.9122
	0.5546	0.5895	0.7596	0.9157
	0.5564	0.592	0.76	0.9158
	0.559	0.5922	0.7613	0.9179
	0.5596	0.5942	0.7636	0.9257
	0.5644	0.5947	0.7664	0.9275
	0.5705	0.5955	0.7695	0.9276
	0.5769	0.5984	0.7727	0.9291
	0.5846	0.6018	0.7737	0.9302
	0.5848	0.6022	0.7743	0.9308
	0.5865	0.6033	0.7751	0.931
	0.587	0.6081	0.7763	0.9313
	0.5936	0.6094	0.7786	0.9329
	0.5953	0.6099	0.7835	0.9387
	0.6004	0.6103	0.7837	0.9439
	0.6036	0.612	0.7841	0.9439
	0.6055	0.6167	0.7879	0.9445
	0.6085	0.6178	0.7883	0.945
	0.6094	0.6186	0.7926	0.9451
	0.61	0.6191	0.7946	0.9467
	0.6105	0.6209	0.7978	0.9582
	0.6136	0.6219	0.8063	0.9612
	0.6168	0.6229	0.8119	0.9622
	0.6171	0.6236	0.824	0.9637
	0.6181	0.625	0.825	0.9664
	0.62	0.6253	0.8269	0.9673
	0.6207	0.6267	0.8287	0.9706
	0.6208	0.628	0.8304	0.9706
	0.6214	0.6306	0.8337	0.9724
	0.6259	0.6314	0.835	0.9752
	0.6317	0.6321	0.8391	0.9776
	0.6367	0.6352	0.8413	0.9824
	0.6391	0.6356	0.8437	0.9829
	0.641	0.6359	0.8468	0.9856
	0.6439	0.6364	0.8525	0.9872
	0.6502	0.6422	0.8533	0.9875
	0.6556	0.6441	0.8545	0.9951
	0.6557	0.6443	0.8563	1
	0.6559	0.6463	0.8594	1.0002
	0.6569	0.6495	0.8614	1.0006
	0.6615	0.6522	0.8626	1.0018
	0.6786	0.6543	0.8634	1.0077
	0.68	0.6557	0.8692	1.0122
	0.68	0.6561	0.8706	1.0138
	0.6852	0.6564	0.8712	1.014
	0.6954	0.658	0.872	1.0196
	0.6954	0.6586	0.8723	1.0245
	0.6965	0.6599	0.8727	1.0333
	0.6997	0.6633	0.8742	1.0353
	0.7023	0.6652	0.8751	1.0362
	0.7091	0.6675	0.8756	1.0373
	0.7129	0.669	0.8771	1.045
	0.7152	0.671	0.8777	1.0455
	0.7238	0.6711	0.88	1.0518
	0.7244	0.6719	0.8851	1.0589
	0.7272	0.672	0.8855	1.0801
	0.7273	0.6733	0.8857	1.0906
	0.7273	0.6747	0.8906	1.0931
	0.7296	0.6771	0.8916	1.0991
	0.7326	0.6786	0.8921	1.1016
	0.7354	0.6789	0.8939	1.1557
	0.743	0.6817	0.8973	1.1739
	0.7435	0.6818	0.8986	1.1798
	0.755	0.683	0.8988	1.2151
	0.7561	0.6844	0.9008	1.2554
	0.7563	0.6863	0.9016	1.2777
	0.7586	0.6886	0.9053	1.3287
	0.7637	0.6886	0.9082	1.3485
	0.7652	0.6914	0.9101	1.3845
	0.7741	0.6919	0.9145	1.4452
	0.7777	0.6922	0.9151	1.5538
	0.7809	0.6961	0.917	1.7085
	0.7897	0.697	0.9192	2.0671
	0.7961	0.6973	0.9212	2.306
	0.7964	0.6975	0.924	3.0473
	0.7992	0.7003	0.9253	5.6159
	0.8039	0.7016	0.9305
	0.8056	0.7028	0.9333
	0.8115	0.7032	0.9359
	0.8198	0.7052	0.9371
	0.8261	0.7066	0.9394
	0.8286	0.7096	0.9403
	0.8295	0.7113	0.9424
	0.8323	0.7116	0.9438
	0.8325	0.7125	0.9458
	0.8408	0.7126	0.9509
	0.8418	0.7155	0.9575
	0.8475	0.7163	0.9635
	0.8549	0.7176	0.9643
	0.8581	0.7178	0.9645
	0.8607	0.7199	0.971
	0.8609	0.7201	0.9847
	0.8654	0.7258	0.9875
	0.8665	0.7262	0.99
	0.8744	0.7274	1.0065
	0.8761	0.7289	1.0067
	0.8829	0.7301	1.0095
	0.8946	0.7337	1.0118
	0.898	0.7342	1.0149
	0.899	0.7356	1.0266
	0.9	0.7384	1.0272
	0.9009	0.7403	1.0448
	0.9033	0.7405	1.0652
	0.9069	0.7417	1.0948
	0.9092	0.743	1.1245
	0.9096	0.744	1.1552
	0.9217	0.7468	1.1723
	0.9292	0.7488	1.2213
	0.9442	0.7504	1.2315
	0.9519	0.7505	1.3499
	0.967	0.7518	1.4475
	0.9726	0.7523	1.7413
	1.0109	0.7525	2.0494
	1.0137	0.7532
	1.0261	0.7544
	1.1186	0.7569
	1.1797	0.7572
	1.4199	0.7585
	1.4485	0.7589
	1.6775	0.7607
		0.7617
		0.7623
		0.7677
		0.7691
		0.7694
		0.7705
		0.7721
		0.7724
		0.7745
		0.7749
		0.7752
		0.7755
		0.7759
		0.7771
		0.7783
		0.7791
		0.7794
		0.78
		0.7805
		0.7809
		0.7821
		0.7826
		0.7861
		0.787
		0.7875
		0.7879
		0.7881
		0.7885
		0.7891
		0.7893
		0.7904
		0.7933
		0.7933
		0.7948
		0.796
		0.7975
		0.8032
		0.8043
		0.8051
		0.8078
		0.8089
		0.81
		0.8103
		0.8125
		0.8143
		0.8149
		0.8151
		0.8157
		0.8189
		0.8243
		0.8245
		0.8297
		0.8311
		0.8343
		0.8356
		0.8362
		0.8367
		0.8369
		0.8408
		0.8409
		0.8505
		0.8506
		0.8531
		0.8562
		0.8641
		0.8647
		0.8727
		0.8759
		0.8773
		0.8779
		0.8795
		0.8806
		0.881
		0.8824
		0.8842
		0.8895
		0.8898
		0.8919
		0.8939
		0.8941
		0.8961
		0.8962
		0.902
		0.9116
		0.9122
		0.9154
		0.9196
		0.9197
		0.9228
		0.925
		0.9252
		0.9328
		0.9602
		0.9616
		0.9657
		1.0062
		1.0123
		1.0316
		1.0319
		1.0394
		1.0585
		1.106
		1.1111
		1.1333
		1.1371
		1.1557
		1.2467
		171.38

## Sheet: Figure 2- figure supplement 1
Upstream gene	S2_TTE	▽aCPSF1_TTE
MMP0001	0.181813	0.065789
MMP0002	0.218637	0.0326977
MMP0003	0.257776	0.151202
MMP0006	0.536943	0.0322578
MMP0007	0.509088	0.445342
MMP0008	0.119999	-0.0284088
MMP0010	0.785686	0.566657
MMP0013	0.485071	0.277308
MMP0014	0.128712	0.0392154
MMP0017	0.499986	0.0882326
MMP0020	0.804069	0.60923
MMP0021	0.0985899	0.0312499
MMP0022	0.244678	0.0833324
MMP0024	0.158536	-0.817917
MMP0025	0.532908	0.475063
MMP0027	0.75997	0.634603
MMP0028	0.0974021	-0.00729889
MMP0029	0.641301	0.388886
MMP0030	0.537027	0.0634907
MMP0031	0.419341	0.0291262
MMP0033	0.144443	0.0313729
MMP0034	0.707788	0.180592
MMP0036	0.818171	0.441858
MMP0037	0.134327	0.00714262
MMP0038	0.396944	0.0517237
MMP0039	0.333321	0.283947
MMP0040	0.632344	0.504583
MMP0041	0.319987	0.0677955
MMP0042	0.322577	0.351757
MMP0044	0.256753	0.150683
MMP0045	0.587529	0.290501
MMP0046	0.457361	0.184289
MMP0050	0.678893	0.212961
MMP0051	0.620595	0.47826
MMP0053	0.297869	0.0666653
MMP0056	0.28235	0.217382
MMP0057	0.582414	0.274998
MMP0058	0.565824	0.414626
MMP0059	0.23867	-0.0283844
MMP0060	0.702265	0.528675
MMP0062	0.50997	0.304189
MMP0063	0.300904	0.0945269
MMP0065	0.820844	0.567302
MMP0066	0.618924	0.417547
MMP0068	0.827558	0.365587
MMP0069	0.799395	0.799515
MMP0070	0.446799	0.901494
MMP0071	0.257139	0
MMP0072	0.558807	0.204541
MMP0073	0.470768	0.199999
MMP0076	0.664733	0.6367
MMP0077	0.386789	0.223527
MMP0078	0.458324	0.312494
MMP0079	0.538009	0.232874
MMP0080	0.249995	0.0485433
MMP0083	0.695254	0.505951
MMP0086	0.739114	0.585712
MMP0087	0.495408	0.316664
MMP0089	0.272719	0.401457
MMP0091	0.394936	0.303863
MMP0092	0.260354	0.14466
MMP0093	0.620802	0.37891
MMP0094	0.227845	0.104615
MMP0095	0.456784	0.191615
MMP0096	0.202529	0.174241
MMP0098	0.795532	0.625326
MMP0100	0.677774	0.346151
MMP0102	0.769201	0.464269
MMP0103	-1.0773	-0.500443
MMP0104	0.533316	0.105768
MMP0105	0.569851	0.22456
MMP0107	0.647021	0.283016
MMP0108	0.736803	0.402982
MMP0110	0.407392	0.0799987
MMP0112	0.565193	0.124997
MMP0115	0.422217	0.165288
MMP0116	0.174601	0.262133
MMP0123	0.692881	0.384103
MMP0125	0.553561	0.119999
MMP0127	0.835989	0.766245
MMP0128	0.428551	0.36362
MMP0130	0.673064	0.218743
MMP0132	0.406976	-0.205607
MMP0133	0.613332	0.45169
MMP0134	0.417265	0.567862
MMP0135	0.159573	0.0990983
MMP0136	0.781817	0.484303
MMP0137	0.536224	0.383719
MMP0139	0.742836	0.515821
MMP0141	0.746148	0.524997
MMP0144	0.666648	0.525666
MMP0148	0.604648	0.142854
MMP0150	0.592045	0.482986
MMP0151	0.223877	0.0901854
MMP0152	0.611103	0.292682
MMP0153	0.666651	0.0191078
MMP0155	0.438596	0.180698
MMP0156	0.128787	0.0607965
MMP0157	0.0769228	0.0830946
MMP0158	0.666982	0.532816
MMP0159	0.133332	0.068301
MMP0162	0.429748	0.205881
MMP0163	0.545698	0.246089
MMP0164	0.403819	0.367396
MMP0170	0.249992	0.0476172
MMP0173	0.166665	0.0824737
MMP0174	0.449989	0.241934
MMP0176	0.425924	0.336632
MMP0178	0.999857	0.999001
MMP0180	0.504757	0.361108
MMP0181	0.687499	0.51643
MMP0182	0.616817	0.186206
MMP0183	0.425618	0.192592
MMP0186	0.277774	0.0393695
MMP0187	0.240961	0.230767
MMP0188	0.327772	0.211485
MMP0189	0.842687	0.43055
MMP0190	0.413779	0.24675
MMP0192	0.730741	0.704624
MMP0194	0.319999	0.179347
MMP0204	0.809516	0.36453
MMP0205	0.499996	0.318963
MMP0209	0.424229	0.1923
MMP0210	0.44826	0.111098
MMP0212	0.671293	0.469023
MMP0214	0.359986	0.343739
MMP0215	0.506166	0.134327
MMP0219	0.737366	0.4322
MMP0220	0.606042	0.173911
MMP0221	0.813248	0.439391
MMP0222	0.333323	0.022222
MMP0224	0.579205	0.280422
MMP0227	0.392149	0.580355
MMP0228	0.160713	-0.00990107
MMP0229	0.617183	0.357721
MMP0230	0.527763	0.195648
MMP0233	0.351342	0.199996
MMP0234	0.568279	0.198472
MMP0235	0.739556	0.402541
MMP0237	0.520822	0.329997
MMP0239	0.333311	0.238634
MMP0241	0.431692	0.190751
MMP0245	0.790591	0.620365
MMP0247	0.470575	0.0350871
MMP0248	0.29268	0.214788
MMP0249	0.679557	0.410111
MMP0250	0.295998	0.224598
MMP0252	0.489681	0.545058
MMP0254	0.279989	0.0468747
MMP0256	0.209999	0.0980387
MMP0258	0.643009	0.400289
MMP0259	0.0967735	0.013761
MMP0260	0.167938	0.0604647
MMP0261	0.50769	0.369562
MMP0263	0.531233	0.594194
MMP0264	0.691349	0.338456
MMP0266	0.536572	0.36486
MMP0270	0.370364	0.19999
MMP0274	0.494732	0.433326
MMP0276	0.536572	0.270828
MMP0277	0.65624	0.212761
MMP0278	0.212115	0.183096
MMP0280	0.49339	0.209677
MMP0281	0.199997	0.0833324
MMP0282	0.450545	0.0752677
MMP0283	0.256753	0.0503143
MMP0284	0.278684	0.0503594
MMP0285	0.202796	-0.0187501
MMP0286	0.189184	0.116666
MMP0287	0.551715	0.0863299
MMP0289	0.58503	0.428568
MMP0290	0.265957	0.0779569
MMP0291	0.426055	0.317399
MMP0292	0.314605	0.163076
MMP0294	0.361501	0.173651
MMP0295	0.641973	0.18676
MMP0297	0.702527	0.366863
MMP0298	0.298291	0.307162
MMP0300	0.208325	0.0425519
MMP0301	0.673898	0.489786
MMP0302	0.203735	0.107407
MMP0303	0.314847	0.135593
MMP0309	0.771572	0.481578
MMP0311	0.161285	0.17105
MMP0313	0.619466	0.244092
MMP0317	0.740241	0.605577
MMP0318	0.417807	0.362433
MMP0319	0.434764	-0.0740712
MMP0321	0.333315	0.209674
MMP0322	0.299998	0.135801
MMP0325	0.714857	0.496891
MMP0326	0.610682	0.268652
MMP0327	0.499994	0.301201
MMP0329	0.2941	0.0535707
MMP0330	0.378782	0.22105
MMP0331	0.215381	0.258739
MMP0333	0.399997	0.0849052
MMP0335	0.640844	0.389129
MMP0339	0.808403	0.653763
MMP0341	0.916728	0.62658
MMP0343	0.447357	0.285712
MMP0344	0.769228	0.645069
MMP0345	0.642811	0.343739
MMP0346	0.880425	0.704906
MMP0347	0.607121	0.421045
MMP0348	0.736357	0.552617
MMP0349	0.766641	0.235287
MMP0350	0.354827	0.36362
MMP0351	0.705841	0.59997
MMP0353	0.439991	0.261898
MMP0354	0.205877	0.0892839
MMP0355	0.521728	0.333331
MMP0359	0.230765	0.187498
MMP0360	0.153843	0.0444439
MMP0363	0.242417	0.099995
MMP0366	0.466636	0.136357
MMP0369	0.864963	0.73294
MMP0370	0.682537	0.450978
MMP0372	0.865601	0.689453
MMP0373	0.702827	0.491646
MMP0375	0.212961	0.658701
MMP0382	0.575335	0.206889
MMP0383	0.824587	0.641974
MMP0384	0.714273	0.33012
MMP0385	0.436356	0.142857
MMP0386	0.774187	0.585124
MMP0387	0.319837	0.059322
MMP0388	0.221052	0.268749
MMP0391	0.55963	0.366729
MMP0392	0.777691	0
MMP0393	0.459995	0.198018
MMP0394	0.358204	0.33628
MMP0396	0.441526	0.244147
MMP0397	0.708328	0.436239
MMP0399	0.838683	0.472522
MMP0400	0.770365	0.46808
MMP0401	0.32352	0.070174
MMP0402	0.614277	0.425922
MMP0405	0.600466	0.217572
MMP0406	0.118881	0.0169488
MMP0407	0.568061	0.486257
MMP0408	0.461527	0.105258
MMP0409	0.249994	0.258056
MMP0411	0.384601	0.132742
MMP0413	0.499991	0.598923
MMP0414	0.666663	-0.475858
MMP0415	0.266661	0
MMP0418	0.564507	0.199994
MMP0419	0.790959	0.467947
MMP0420	0.509082	0.489793
MMP0421	0.244893	0.269229
MMP0422	0.506323	0.246572
MMP0423	0.363628	0.38333
MMP0424	0.421042	0.057691
MMP0426	0.145831	-0.0833321
MMP0427	0.719619	0.464283
MMP0428	0.599992	0.342589
MMP0429	0.563105	0.255143
MMP0430	0.434776	0.327799
MMP0431	0.613629	0.23936
MMP0433	0.232756	0.1133
MMP0434	0.639093	0.568771
MMP0439	0.144577	0.04301
MMP0440	0.47321	0.136239
MMP0441	0.578613	0.256637
MMP0442	0.220993	0.248996
MMP0444	0.539311	0.222102
MMP0447	0.729673	0.561538
MMP0452	0.628565	0.337833
MMP0455	0.299992	0.0833299
MMP0457	0.667424	0.370434
MMP0458	0.500599	0.75632
MMP0459	0.879278	0.294962
MMP0464	0.41174	0.33332
MMP0476	0.428564	0.228309
MMP0480	0.314431	0.107018
MMP0482	0.413786	0.355552
MMP0487	0.571388	0.384586
MMP0489	0.630128	0.408445
MMP0490	0.454532	0.199997
MMP0493	0.45713	0.44185
MMP0496	0.551705	0.23528
MMP0498	0.659993	0.291664
MMP0500	0.691482	0.571424
MMP0502	0.394727	0.224488
MMP0511	0.90474	0.222197
MMP0514	0.839966	0.357117
MMP0516	0.326312	0.243586
MMP0519	0.833264	0.0999902
MMP0524	0.871552	0.888856
MMP0526	0.122447	0.11111
MMP0528	0.539264	0.0969162
MMP0529	0.804485	0.864715
MMP0531	0.319142	0.290904
MMP0532	0.571417	0.212761
MMP0533	0.595732	0.273806
MMP0534	0.327863	0.126435
MMP0536	0.36362	0.124992
MMP0538	0.636354	0.407404
MMP0539	0.496685	0.333331
MMP0540	0.459009	0.129411
MMP0541	0.319993	0.292855
MMP0542	0.537493	0.446968
MMP0543	0.566648	0.0975584
MMP0544	0.53842	0.263153
MMP0545	0.642099	0.389259
MMP0546	0.274504	0.0687496
MMP0549	0.30952	0.173683
MMP0550	0.798812	0.66666
MMP0553	0.690715	0.32031
MMP0555	0.274993	0.105261
MMP0559	0.734437	0.522319
MMP0561	0.32432	0.249996
MMP0562	0.464269	0.212118
MMP0563	0.888864	0.499972
MMP0566	0.682631	0.516481
MMP0572	0.586877	0.424498
MMP0573	0.227269	0.00568154
MMP0574	0.271787	0.12966
MMP0575	0.726303	0.672681
MMP0576	-0.324528	-0.055046
MMP0577	0.376236	0.208897
MMP0578	0.277105	0.0552142
MMP0581	0.681787	0.111105
MMP0584	0.707308	0.545451
MMP0585	0.616632	0.229555
MMP0589	0.122805	-0.0169495
MMP0590	0.464782	0.15238
MMP0591	0.73684	0.451611
MMP0592	0.378368	0.0819658
MMP0596	0.256407	0.391128
MMP0597	0.510202	0.220735
MMP0598	0.428556	0.153061
MMP0600	0.574993	0.351722
MMP0601	0.708501	0.570604
MMP0603	0.136362	0.0472098
MMP0604	0.67862	0.437228
MMP0605	0.598744	0.289075
MMP0606	0.295179	0.0874997
MMP0608	0.411757	0.142855
MMP0610	0.409829	0.0924363
MMP0611	0.164705	0.0735285
MMP0613	0.524582	0.193542
MMP0614	0.711063	0.773864
MMP0615	0.755503	0.682255
MMP0617	0.285704	0.193542
MMP0620	0.843009	0.526991
MMP0624	0.520547	0.367918
MMP0625	0.803534	0.672377
MMP0626	0.17073	0.0369512
MMP0627	0.458643	0.224949
MMP0628	0.622941	0.150683
MMP0629	0.463082	0.289855
MMP0630	0.481475	0.223212
MMP0631	0.433329	0.212118
MMP0632	0.607121	0.232139
MMP0633	0.60475	0.425991
MMP0636	0.52747	0.335712
MMP0637	0.490557	0.374998
MMP0638	0.152939	0.241705
MMP0639	0.462717	0.469258
MMP0642	0.378368	0.176465
MMP0643	0.407581	0.326387
MMP0644	0.309089	0.253332
MMP0646	0.299998	0.160376
MMP0647	0.245898	0.0493818
MMP0651	0.537875	-0.33928
MMP0654	0.838672	0.679319
MMP0655	0.799973	0.285712
MMP0656	0.181517	0.423566
MMP0657	0.34424	0.184309
MMP0658	0.624993	0.116666
MMP0660	0.714235	0.124992
MMP0664	0.693537	0.114282
MMP0665	0.146788	0.0721643
MMP0666	0.442306	0.271184
MMP0667	0.559993	0.533831
MMP0668	0.149423	0.149605
MMP0669	0.776011	0.658516
MMP0670	0.390619	0.607809
MMP0671	0.793076	0.599997
MMP0672	0.44826	0.163932
MMP0674	0.476179	0.119995
MMP0676	0.794851	0.325839
MMP0679	0.305387	0.246376
MMP0680	0.727267	0.544941
MMP0681	0.416649	0.597006
MMP0682	0.450591	0.123393
MMP0683	0.130433	-0.349393
MMP0684	0.48148	0.338541
MMP0685	0.0775861	0.0373832
MMP0686	0.784426	0.0465103
MMP0687	0.484176	0.212121
MMP0689	0.874995	0.588587
MMP0692	0.815898	0.670638
MMP0693	0.321423	0.261774
MMP0694	0.343913	0
MMP0695	0.818401	0.371498
MMP0696	0.499979	0.136357
MMP0698	0.644623	0.29921
MMP0701	0.527763	0.489578
MMP0702	0.49999	0.207864
MMP0704	0.503936	0.383243
MMP0706	0.488361	0.179482
MMP0708	0.691582	0.383174
MMP0709	0.754716	0.534957
MMP0712	0.574986	0.0645139
MMP0714	0.342096	0.402772
MMP0716	0.648777	0.438847
MMP0718	0.509137	0.151898
MMP0719	0.726561	0.519998
MMP0720	0.698402	0.345452
MMP0723	0.557135	0.367019
MMP0727	0.549986	0.243237
MMP0729	0.499969	0.484834
MMP0734	0.549614	0.249995
MMP0735	0.565213	0.180849
MMP0737	0.552687	0.275229
MMP0738	0.139738	0.0224036
MMP0739	0.424989	0.266649
MMP0756	0.424989	0.0769202
MMP0760	0.866652	0.327267
MMP0761	0.432421	0.366654
MMP0770	0.481472	0.444428
MMP0785	0.297289	0.142854
MMP0788	0.59998	0.703678
MMP0790	0.857082	0.583285
MMP0792	0.545405	0.190467
MMP0798	0.91659	0.39992
MMP0799	0.818145	0.749983
MMP0809	0.769221	0.49397
MMP0811	0.361101	0.0833316
MMP0812	0.897413	0.63264
MMP0814	0.431808	0.66128
MMP0816	0.666652	0.517848
MMP0826	0.291337	0.119791
MMP0827	0.781226	0.428541
MMP0839	0.184208	0.0558654
MMP0841	0.705841	0.574847
MMP0843	0.599983	0.171423
MMP0844	0.567552	0.263734
MMP0846	0.62498	0.347823
MMP0850	0.187494	0
MMP0851	0.327581	0.136362
MMP0855	0.499979	0.333296
MMP0859	0.594579	0.333306
MMP0860	0.399987	0.272702
MMP0862	0.489351	0.123152
MMP0865	0.647051	0.392738
MMP0866	0.678082	0.415896
MMP0867	0.599301	0.492273
MMP0870	0.882301	0.357117
MMP0872	0.284311	0.199998
MMP0874	0.424241	0.279568
MMP0875	0.340418	0.242417
MMP0876	0.396219	0.222216
MMP0878	0.617975	0.477847
MMP0879	0.64583	0.285713
MMP0881	0.65216	0.166661
MMP0883	0.442305	0.143835
MMP0886	0.229504	0
MMP0887	0.698621	0.571428
MMP0888	0.73604	0.553385
MMP0889	0.259256	0.186045
MMP0890	0.838223	0.921736
MMP0891	0.277773	0.134327
MMP0894	0.305803	0.294999
MMP0895	0.266658	0.170587
MMP0897	0.644225	0.0661763
MMP0898	0.67796	0.619998
MMP0901	0.43055	0.0669144
MMP0902	0.579539	0.188138
MMP0904	0.179999	0.113474
MMP0908	0.627653	0.13793
MMP0909	0.224998	0.165876
MMP0910	0.348479	0.173076
MMP0911	0.589033	0.348016
MMP0912	0.874982	0.391296
MMP0915	0.178571	0.0849798
MMP0916	0.770491	0.585097
MMP0917	0.213269	0.107003
MMP0919	0.787867	0.47706
MMP0920	0.591662	0.224636
MMP0923	0.613325	0.216666
MMP0929	0.346147	0.107526
MMP0931	0.855546	0.430767
MMP0933	0.499958	0.343134
MMP0934	0.382342	0.26027
MMP0937	0.349997	0.176469
MMP0938	0.336731	0.213872
MMP0939	0.423721	0.170211
MMP0942	0.380934	0.0666644
MMP0946	0.340908	0.128491
MMP0947	0.421868	0.0416646
MMP0948	0.687896	0.389066
MMP0949	0.46268	0.68551
MMP0952	0.289346	0.299784
MMP0954	0.454525	0.11538
MMP0955	0.388233	0.406972
MMP0956	0.483603	0.187968
MMP0959	0.65515	0.356318
MMP0961	0.731332	0.471541
MMP0963	0.807173	0.563692
MMP0964	0.156378	0.0444439
MMP0965	0.469387	0.30337
MMP0966	0.124998	0.0740732
MMP0967	0.392843	0.145452
MMP0969	0.699995	0.315786
MMP0971	0.449578	0.231526
MMP0972	0.366409	0.147239
MMP0975	0.860445	0.562465
MMP0978	0.170542	0
MMP0979	0.472967	0.145452
MMP0985	0.29999	-0.0399983
MMP0986	0.370357	0.444435
MMP0989	0.553393	0.319584
MMP0992	0.511139	0.496527
MMP0997	0.59998	0.166661
MMP0998	0.719993	0.499996
MMP0999	0.377769	0.173909
MMP1001	0.241375	0
MMP1002	0.177774	0.193542
MMP1009	0.279659	0.236841
MMP1011	0.643827	0.399989
MMP1012	0.684193	0.368402
MMP1013	0.687493	0.260866
MMP1014	0.605258	0.522165
MMP1015	0.301526	0.233449
MMP1016	0.493112	0.373332
MMP1017	0.278625	0.219268
MMP1018	0.475243	0.217947
MMP1019	0.551705	0.237284
MMP1021	0.646546	0.358023
MMP1024	0.588201	0.440363
MMP1026	0.318177	0.0869556
MMP1029	0.287034	0.0798717
MMP1030	0.526312	0.267108
MMP1031	0.540144	0.245398
MMP1032	0.57281	0.34228
MMP1033	0.448971	0.343278
MMP1036	0.911013	0.64727
MMP1037	0.470561	0.357891
MMP1038	0.154205	0.226221
MMP1039	0.133332	0.0367648
MMP1040	0.173075	0.0719421
MMP1041	0.370368	0.249999
MMP1043	0.399995	0.381816
MMP1044	0.537032	0.247523
MMP1045	0.183906	0.17361
MMP1046	0.138887	0.034722
MMP1047	0.879331	0.705609
MMP1048	0.153843	0.104711
MMP1049	0.366924	0.211805
MMP1050	0.20502	0.115485
MMP1053	0.773532	0.667794
MMP1056	0.265057	0.0508462
MMP1057	0.147539	0.0499995
MMP1060	0.619018	0.23999
MMP1062	0.317065	0.270263
MMP1063	0.579063	0.658205
MMP1064	0.647057	0.272044
MMP1066	0.357138	0.0327866
MMP1067	0.393436	0.184712
MMP1068	0.533316	0.467734
MMP1069	0.73912	0.462764
MMP1070	0.677955	0.588229
MMP1071	0.735835	0.232553
MMP1074	0.326665	0.100774
MMP1075	0.239724	0.249998
MMP1076	0.318168	0.245278
MMP1077	0.366654	0.129627
MMP1080	0.327581	0.0357133
MMP1082	0.483855	0.359369
MMP1083	0.209297	0.11111
MMP1084	0.29687	0.0985899
MMP1085	0.333315	0.140348
MMP1088	0.163932	0.0384606
MMP1090	0.78332	0.53225
MMP1091	0.718739	0.204078
MMP1092	0.342847	0.190472
MMP1094	0.466274	0.486485
MMP1095	0.806439	0.88884
MMP1100	0.759767	0.386751
MMP1101	0.424995	0.079997
MMP1103	0.477262	0.499993
MMP1104	0.599988	0.249995
MMP1106	0.372447	0.108695
MMP1107	0.158939	0.0855262
MMP1109	0.321417	0.424834
MMP1110	0.651148	0.579542
MMP1113	0.666659	0.294113
MMP1116	0.824624	0.53061
MMP1117	0.171945	0.177303
MMP1118	0.451217	0.241756
MMP1119	0.333321	0.432093
MMP1120	0.624995	0.0916028
MMP1121	0.101447	0
MMP1122	0.734364	0.494315
MMP1124	0.611094	0.380934
MMP1126	0.761887	0.294112
MMP1127	0.412692	0.233694
MMP1128	0.374992	0.390861
MMP1129	0.324673	0.18884
MMP1131	0.648432	0.216559
MMP1132	0.333315	0.109373
MMP1133	0.516112	0.301881
MMP1134	0.653834	0.448815
MMP1136	0.599996	0.181815
MMP1137	0.19718	0.0735285
MMP1139	0.876182	0.631572
MMP1140	0.206184	0.0784302
MMP1142	0.163633	0.107525
MMP1143	0.619038	0.377547
MMP1146	0.315216	0.156105
MMP1147	0.457873	0.317735
MMP1148	0.0654197	0.0670728
MMP1149	0.819181	0.63223
MMP1152	0.687491	0.560807
MMP1153	0.559207	0.261534
MMP1154	0.307681	0
MMP1155	0.293098	0.0361446
MMP1156	0.891556	0.764036
MMP1158	0.906443	0.821349
MMP1160	0.862294	0.511762
MMP1161	0.846542	0.564442
MMP1163	0.574876	0.409593
MMP1164	0.679973	0.605835
MMP1167	0.579539	0.615938
MMP1168	0.190472	0.160492
MMP1169	0.303367	0.118643
MMP1172	0.349982	0.0270263
MMP1174	0.849386	0.712293
MMP1175	0.566027	0.224485
MMP1177	0.403314	0.204892
MMP1178	0.812774	0.594016
MMP1180	0.649968	0.357795
MMP1181	0.413035	0.0952339
MMP1183	0.682137	0.201813
MMP1186	0.671777	0.286162
MMP1188	0.783066	0.597789
MMP1189	0.516945	0.223299
MMP1190	0.514849	0.215682
MMP1191	0.668741	0.598151
MMP1194	0.897413	0.594579
MMP1196	0.458324	0.206889
MMP1197	0.53842	0.428559
MMP1198	0.449433	0.277774
MMP1199	0.627108	0.0833324
MMP1200	0.533331	0.536228
MMP1201	0.588218	0.166664
MMP1204	0.523797	0.195648
MMP1206	0.473	0.415766
MMP1207	0.530526	0.374452
MMP1208	0.633176	0.280564
MMP1209	0.479157	0.250995
MMP1210	0.321917	0.202733
MMP1211	0.290906	0.281937
MMP1212	0.472101	0.380681
MMP1213	0.674319	0.492904
MMP1215	0.638871	0.213739
MMP1216	0.39999	0.3401
MMP1217	0.433326	0.0561791
MMP1220	0.352934	0.187498
MMP1221	0.580626	0.124997
MMP1222	0.520421	0.294715
MMP1224	0.296482	0.185185
MMP1225	0.32257	0.014286
MMP1229	0.743571	0.227262
MMP1230	0.629606	0.0322568
MMP1231	0.499992	0.339619
MMP1233	0.270263	0.199987
MMP1235	0.374984	0.148142
MMP1237	0.791033	0.462361
MMP1241	0.328569	0.288887
MMP1242	0.13253	0.0350871
MMP1245	0.18181	-0.0333322
MMP1246	0.590882	0.529404
MMP1247	0.112674	0.0967735
MMP1248	0.549986	0.272723
MMP1249	0.827319	0.670807
MMP1251	0.303021	0.2093
MMP1252	0.453331	0.256603
MMP1255	0.582157	0.351463
MMP1257	0.342096	0.0606059
MMP1259	0.544376	0.282757
MMP1260	0.724876	0.610644
MMP1261	0.396737	0.263735
MMP1265	0.677398	0.260858
MMP1270	0.589033	0.369858
MMP1271	0.415092	0.179243
MMP1273	0.433319	0.399993
MMP1274	0.753621	0.449149
MMP1276	0.279408	0.0754703
MMP1277	0.285709	0.357136
MMP1280	0.386307	0.538133
MMP1281	0.272725	0.148935
MMP1282	0.32432	0.170211
MMP1284	0.461521	0.32352
MMP1286	0.266661	0.140623
MMP1287	0.671224	0.0909074
MMP1289	0.559721	0.109251
MMP1290	0.189472	0.107526
MMP1292	0.47824	0
MMP1293	0.238084	0.179997
MMP1294	0.461521	0.148142
MMP1295	0.424229	0.0869531
MMP1297	0.841154	0.69627
MMP1298	0.417644	0.482104
MMP1299	0.434147	0.449152
MMP1300	0.133986	0.0195531
MMP1301	0.452623	0.447091
MMP1302	0.64652	0.426842
MMP1303	0.249996	0.0796456
MMP1306	0.406591	0.351693
MMP1308	0.744768	0.647901
MMP1310	0.504128	0.487105
MMP1314	0.574995	0.382351
MMP1315	0.468075	0.313719
MMP1318	0.478256	0.180553
MMP1319	0.359724	0.254826
MMP1321	0.155999	0.10574
MMP1322	0.461536	0.227799
MMP1324	0.457361	0.322033
MMP1325	0.800319	0.436864
MMP1326	0.0123964	0.0260711
MMP1327	0.753941	0.454975
MMP1328	0.148436	0.0220996
MMP1329	0.277566	0.192031
MMP1330	0.141777	0.061551
MMP1331	0.476168	0.156248
MMP1332	0.636335	0.0909074
MMP1333	0.596765	0.867672
MMP1334	0.247421	0.0277774
MMP1337	0.59848	0.378943
MMP1338	0.531904	0.363628
MMP1343	0.416649	0.161971
MMP1345	0.254897	0.0758923
MMP1347	0.705983	0.578443
MMP1348	0.285701	0.0588226
MMP1349	0.406773	0.272724
MMP1352	0.188775	0.0253164
MMP1356	0.333329	0.0970867
MMP1358	0.792445	0.431504
MMP1360	0.309732	0.0640394
MMP1361	0.205877	0.147268
MMP1362	0.316452	0.175122
MMP1363	0.173909	0.0518136
MMP1364	0.745041	0.587301
MMP1365	0.243241	0.230088
MMP1366	0.104166	0.0528168
MMP1367	0.109588	0.0179952
MMP1368	0.440412	0.254789
MMP1369	0.766374	0.63938
MMP1370	0.718636	0.532534
MMP1371	0.669821	0.492733
MMP1373	0.608503	0.48532
MMP1375	0.788727	0.164704
MMP1376	0.833316	0.464782
MMP1377	0.512807	0.0294117
MMP1378	0.445024	0.405061
MMP1379	0.421346	0.120567
MMP1380	0.413779	0.0724629
MMP1381	0.725371	0.434387
MMP1382	0.399995	0.180553
MMP1383	0.431997	0.483218
MMP1384	0.449996	0.468747
MMP1385	0.546964	0.498486
MMP1387	0.319993	0.105262
MMP1388	0.307681	0.0517228
MMP1391	0.557889	0.431534
MMP1394	0.685695	0.380934
MMP1396	0.714282	0.539818
MMP1399	0.22727	0.152865
MMP1401	0.51923	0.261681
MMP1402	0.159998	0.12605
MMP1403	0.139343	0.0720334
MMP1405	0.246073	0.167202
MMP1406	0.160332	0.230089
MMP1407	0.21069	0.0846154
MMP1408	0.247572	0.348949
MMP1409	0.261903	0.267573
MMP1410	0.295999	0.312859
MMP1411	0.143884	0.0751873
MMP1412	0.713606	0.683812
MMP1413	0.553689	0.486841
MMP1414	0.0984843	0.0155436
MMP1417	0.12676	0.0189278
MMP1418	0.17213	-0.0212012
MMP1419	0.646223	0.663635
MMP1420	0.140495	0.0050761
MMP1421	0.808611	0.680161
MMP1422	0.655796	0.421985
MMP1424	0.694213	0.38267
MMP1425	0.24999	0.0294117
MMP1427	0.0412364	0.133136
MMP1428	0.372857	0.178756
MMP1429	0.46126	0.21281
MMP1432	0.812731	0.516798
MMP1433	0.769393	0.529801
MMP1435	0.305239	0.124248
MMP1436	0.428568	0.235631
MMP1437	0.671424	0.311763
MMP1438	0.814152	0.610014
MMP1439	0.488366	0.278477
MMP1441	0.536839	0.209439
MMP1442	0.702018	0.511529
MMP1445	0.405403	0.180722
MMP1447	0.0652161	0.105262
MMP1452	0.301881	0.237111
MMP1453	0.272721	0.117646
MMP1455	0.162787	0.0384606
MMP1456	0.199994	-0.0208332
MMP1461	0.241371	0.283578
MMP1467	0.657287	0.413697
MMP1469	0.509086	0.117646
MMP1470	0.712705	0.256917
MMP1472	0.411753	0.186044
MMP1474	0.249999	0.180644
MMP1475	0.354328	0.198472
MMP1479	0.377043	0.130433
MMP1480	0.804729	0.593748
MMP1481	0.362495	0.240382
MMP1482	0.169741	0.191234
MMP1483	0.512183	0.139532
MMP1485	0.168477	0.0528635
MMP1486	0.502791	0.334599
MMP1488	0.161288	0.0384606
MMP1489	0.538456	0.199997
MMP1491	0.373129	0.139999
MMP1493	0.604214	0.358599
MMP1494	0.399995	0.491375
MMP1495	0.156248	0.0166665
MMP1498	0.424777	0.142857
MMP1499	0.254657	0.364216
MMP1500	0.799999	0.408962
MMP1502	0.334385	0.0726573
MMP1504	0.434773	0.0634907
MMP1505	0.222219	0.222218
MMP1506	0.187496	0
MMP1508	0.173331	0.0912544
MMP1509	0.654748	0.297598
MMP1510	0.613041	0.237318
MMP1511	0.853895	0.698687
MMP1512	0.666642	0.416632
MMP1515	0.771276	0.692355
MMP1516	0.63792	0.337833
MMP1517	0.560962	0.449537
MMP1518	0.409829	0.379992
MMP1520	0.391564	0.305554
MMP1523	0.759418	0.649154
MMP1525	0.636355	0.428559
MMP1527	0.635287	0.339621
MMP1530	0.337833	0.295771
MMP1532	0.472209	0.0285707
MMP1534	0.765796	0.484057
MMP1537	0.0624959	-0.285674
MMP1538	0.905659	0.72316
MMP1540	0.167882	0.051282
MMP1541	0.738885	0.580107
MMP1543	0.123456	0.0938508
MMP1546	0.442558	0.449299
MMP1547	0.621334	0.330907
MMP1550	0.679484	0.480516
MMP1551	0.649119	0.46818
MMP1553	0.451084	0.113207
MMP1554	0.681803	0.477872
MMP1555	0.183671	0.0549446
MMP1558	0.189393	0.0523555
MMP1559	0.687311	0.671167
MMP1561	0.194027	0.019802
MMP1562	0.383231	0.232455
MMP1565	0.158877	0.129629
MMP1566	0.171872	0.0404038
MMP1567	0.852702	0.660381
MMP1568	0.508284	0.204419
MMP1573	0.583309	0.129869
MMP1576	0.142	0.0866262
MMP1577	0.958155	0.926538
MMP1579	0.856641	0.594606
MMP1582	0.258056	0.202896
MMP1583	0.660547	0.650907
MMP1584	0.887542	0.688653
MMP1586	0.770731	0.570306
MMP1588	0.895154	0.398988
MMP1589	0.718744	0.373734
MMP1590	0.333327	0.216213
MMP1592	0.568956	0.288131
MMP1594	0.388867	0.171426
MMP1595	0.499975	0.397845
MMP1599	0.512189	0.343431
MMP1602	0.370357	0.187049
MMP1604	0.648643	0.464133
MMP1608	0.739897	0.478046
MMP1609	0.853055	0.634703
MMP1610	0.188234	0.0714285
MMP1611	0.198196	0.0635591
MMP1613	0.327583	0.25287
MMP1615	0.495625	0.344185
MMP1617	0.499964	0.31248
MMP1619	0.258062	0.154638
MMP1621	0.672039	0.394283
MMP1622	0.272715	0.166662
MMP1626	0.242417	0.15254
MMP1627	0.297289	0.287034
MMP1628	0.299994	0.186914
MMP1629	0.360757	0.408161
MMP1630	0.410522	0.0823524
MMP1632	0.563824	0.489791
MMP1633	0.627267	0.480616
MMP1635	0.746909	0.40476
MMP1636	0.145831	0.0422529
MMP1637	0.162158	0.263153
MMP1639	0.259995	0.0416646
MMP1640	0.374764	0.173911
MMP1642	0.168537	0.149484
MMP1643	0.264411	0.290135
MMP1644	0.692767	0.239616
MMP1646	0.281345	0.0827337
MMP1647	0.428186	0.210598
MMP1648	0.347821	0.259374
MMP1652	0.742836	0.153835
MMP1653	0.583285	0.0714259
MMP1655	0.333326	0.116276
MMP1656	0.346932	0.169228
MMP1658	0.752855	0.531335
MMP1659	0.317643	0.259254
MMP1661	0.359997	0.180449
MMP1662	0.274334	0.0647475
MMP1664	0.479981	-0.149992
MMP1671	0.624974	0.600499
MMP1678	0.169011	0.033112
MMP1679	0.366409	0.251798
MMP1681	0.408837	0.414411
MMP1683	0.394492	0.0949718
MMP1684	0.0937481	0.0535707
MMP1685	0.205217	0.0717948
MMP1687	0.166662	0.0740732
MMP1688	0.337658	0.166665
MMP1689	0.365587	0.078651
MMP1691	0.747197	0.629708
MMP1692	0.612793	0.42941
MMP1693	0.701009	0.415093
MMP1694	0.610758	0.559658
MMP1695	0.210083	0.0808815
MMP1696	0.189943	0.0285717
MMP1697	0.923352	0.901135
MMP1698	0.163841	0.132128
MMP1699	0.241371	0.212761
MMP1700	0.574876	0.314283
MMP1702	0.940531	0.892916
MMP1703	0.120141	-0.00295873
MMP1704	0.297958	0.184339
MMP1707	0.324071	0.22262
MMP1708	0.611111	0.290289
MMP1710	0.172077	0.167992
MMP1711	0.202245	0
MMP1712	0.333325	0.207544
MMP1714	0.689074	0.818574
MMP1717	0.584895	0.473279
MMP1720	0.224994	0.0540524
MMP1721	0.861311	0.558279

## Sheet: Figure 2- figure supplement 2C
pos	S2_TTE	TQRR
59	0.113579	5.4856
5100	0.111465	5.42613
36773	0.407406	0.657489
82175	0	1.28571
82647	0.707478	0.240019
113508	0.383442	0.728608
113614	0.276428	0.785172
113704	0.376483	0.872604
113707	0.209342	0.891058
162063	0.462066	0.60874
163717	0.845502	0.456553
197732	0.389066	0.663983
212146	0.521821	0.990839
263047	0.29999	0.844834
263696	0.929808	0.213494
299145	0.704834	0.747272
335576	0.367302	0.780922
335583	0.3429	0.869299
335677	0.70242	0.581991
335731	0.333321	0.666679
339328	0.315064	1.29232
339404	0.399984	0.641877
339410	0.59996	0.40004
372775	0.217382	0.802431
383715	0	1.12583
451927	0.172408	0.791214
454180	0.224136	0.868228
454284	0.542162	0.491256
454855	0.709258	0.297833
455049	0.307669	0.703498
455503	0.526539	0.986745
473414	0.895433	0.30943
473601	0.322314	0.860359
478487	0.918173	0.189686
495845	0.454532	0.62938
573467	0.461057	0.722113
643704	0.551015	1.00634
700188	0.13793	0.878648
700208	0.636354	0.37912
731668	0.666556	0.37049
755775	0.714821	0.562159
851824	0.701147	0.647055
1134228	0.142837	0.857163
1187869	0.150683	0.549563
1263718	0.727049	0.4347
1263721	0.327326	0.743844
1263729	0.407033	0.600288
1263748	0.717384	0.444704
1268892	0.249994	0.7347
1268945	0.299998	1.38935
1268948	0.61123	0.7619
1269036	0.161364	0.992995
1305276	0.199994	1.2174
1305857	0.131249	0.872718
1305859	0.0583937	0.888153
1461977	0.305571	7.4988
1461979	0.630628	3.27646
1461986	0.820823	0.406616
1462009	0.166667	0.860927
1462019	0.795335	0.285224
1462024	0.675667	0.346961
1497967	0.826575	0.378027
1497970	0.506487	0.915051
1507711	0.216211	0.799465
1507714	0.537493	0.553193
1507716	0.252523	0.859598
1507717	0.191917	0.914059
1508062	0.665235	0.563236
1508065	0.685893	0.632831
1600887	0.424229	0.85627
1600890	0.648929	0.750561
1601182	0.297028	0.878714
1601575	0.268929	0.896721
1601577	0.586317	0.697349
1601580	0.37795	0.848249
1627499	0.847764	0.262606
1639568	0.864841	0.494632
1644197	0.610712	0.403068
