# Supplementary material for: aCPSF1 cooperates with terminator U-tract to dictate archaeal transcription termination efficacy
Source: eLife. 2021 Dec 29;10:e70464. doi: 10.7554/eLife.70464 (PMC8716108; doi:10.7554/eLife.70464)
Supplement: Figure 3—figure supplement 3—source data 1. [file elife-70464-fig3-figsupp3-data1.xlsx]

## Sheet: 0400
Run 1; Ch 2; Cy 10; RefSub; MPY; conc=62.5_X	Run 1; Ch 2; Cy 10; RefSub; MPY; conc=62.5_Y	Run 1; Ch 2; Cy 11; RefSub; MPY; conc=125_X	Run 1; Ch 2; Cy 11; RefSub; MPY; conc=125_Y	Run 1; Ch 2; Cy 12; RefSub; MPY; conc=250_X	Run 1; Ch 2; Cy 12; RefSub; MPY; conc=250_Y	Run 1; Ch 2; Cy 13; RefSub; MPY; conc=500_X	Run 1; Ch 2; Cy 13; RefSub; MPY; conc=500_Y	Run 1; Ch 2; Cy 14; RefSub; MPY; conc=1000_X	Run 1; Ch 2; Cy 14; RefSub; MPY; conc=1000_Y
-36.9	0.1103	-36.8	0.192198	-36.8	0.317498	-36.7	0.1649	-36.8	0.327598
-36.8	0.0525	-36.7	0.2594	-36.7	0.2602	-36.6	0.0782001	-36.7	0.2899
-36.7	0.0382	-36.6	0.203201	-36.6	0.191101	-36.5	0.0549	-36.6	0.247801
-36.6	0.0328001	-36.5	0.1798	-36.5	0.169	-36.4	0.0758981	-36.5	0.2261
-36.5	0.0468	-36.4	0.1897	-36.4	0.171	-36.3	0.0705	-36.4	0.1876
-36.4	0.0598001	-36.3	0.168102	-36.3	0.145402	-36.2	0.0412	-36.3	0.152102
-36.3	0.032	-36.2	0.152	-36.2	0.1028	-36.1	0.0505	-36.2	0.1222
-36.2	0.0302	-36.1	0.188501	-36.1	0.116501	-36	0.0802	-36.1	0.128901
-36.1	0.0608	-36	0.1796	-36	0.1168	-35.9	0.0998982	-36	0.1185
-36	0.0569	-35.9	0.1589	-35.9	0.1155	-35.8	0.1239	-35.9	0.109
-35.9	0.0634	-35.8	0.151302	-35.8	0.117802	-35.7	0.1402	-35.8	0.0867017
-35.8	0.0489	-35.7	0.1479	-35.7	0.1244	-35.6	0.1334	-35.7	0.0883
-35.7	0.0519	-35.6	0.112102	-35.6	0.0862016	-35.5	0.1239	-35.6	0.0759016
-35.6	0.0234999	-35.5	0.1044	-35.5	0.0911	-35.4	0.118399	-35.5	0.0669
-35.5	0.0296	-35.4	0.0974	-35.4	0.1145	-35.3	0.1292	-35.4	0.0889
-35.4	0.0364	-35.3	0.0885011	-35.3	0.121601	-35.2	0.1461	-35.3	0.0959011
-35.3	0.0294	-35.2	0.1086	-35.2	0.1563	-35.1	0.1461	-35.2	0.1495
-35.2	0.051	-35.1	0.119701	-35.1	0.171901	-35	0.1446	-35.1	0.162801
-35.1	0.0606	-35	0.1023	-35	0.1572	-34.9	0.1307	-35	0.1632
-35	0.0416	-34.9	0.1053	-34.9	0.1584	-34.8	0.1326	-34.9	0.164
-34.9	0.0211001	-34.8	0.1255	-34.8	0.164	-34.7	0.1469	-34.8	0.1776
-34.8	0.0294	-34.7	0.1243	-34.7	0.1526	-34.6	0.1265	-34.7	0.182
-34.7	0.033	-34.6	0.0952012	-34.6	0.153301	-34.5	0.1236	-34.6	0.165901
-34.6	0.0149	-34.5	0.0895	-34.5	0.1422	-34.4	0.1285	-34.5	0.1549
-34.5	0.0102	-34.4	0.0828	-34.4	0.1487	-34.3	0.1247	-34.4	0.1625
-34.4	0.00390004	-34.3	0.0929005	-34.3	0.1628	-34.2	0.1316	-34.3	0.1602
-34.3	0.0126	-34.2	0.0844	-34.2	0.1637	-34.1	0.1337	-34.2	0.1711
-34.2	0.012	-34.1	0.0984005	-34.1	0.1711	-34	0.1414	-34.1	0.1713
-34.1	0.0193	-34	0.0988	-34	0.1674	-33.9	0.1357	-34	0.1671
-34	0.0193	-33.9	0.1007	-33.9	0.1651	-33.8	0.1479	-33.9	0.1765
-33.9	0.0271	-33.8	0.1038	-33.8	0.1767	-33.7	0.158	-33.8	0.1937
-33.8	0.0342	-33.7	0.1027	-33.7	0.176	-33.6	0.1536	-33.7	0.1906
-33.7	0.0294999	-33.6	0.0913005	-33.6	0.160901	-33.5	0.1546	-33.6	0.190001
-33.6	0.0348	-33.5	0.0892	-33.5	0.1577	-33.4	0.1557	-33.5	0.1821
-33.5	0.0251	-33.4	0.0948	-33.4	0.1595	-33.3	0.1692	-33.4	0.1957
-33.4	0.0251	-33.3	0.0935001	-33.3	0.158	-33.2	0.1772	-33.3	0.218
-33.3	0.0415	-33.2	0.0823	-33.2	0.1622	-33.1	0.1853	-33.2	0.2209
-33.2	0.0381	-33.1	0.0827004	-33.1	0.159	-33	0.1796	-33.1	0.225
-33.1	0.044	-33	0.0759	-33	0.1499	-32.9	0.1845	-33	0.2126
-33	0.0251	-32.9	0.0827999	-32.9	0.1534	-32.8	0.1864	-32.9	0.2162
-32.9	0.0229999	-32.8	0.0863999	-32.8	0.1654	-32.7	0.1992	-32.8	0.2293
-32.8	0.0235	-32.7	0.0923	-32.7	0.1811	-32.6	0.1957	-32.7	0.2387
-32.7	0.0349	-32.6	0.0914003	-32.6	0.1831	-32.5	0.2	-32.6	0.2329
-32.6	0.0304	-32.5	0.0969	-32.5	0.1922	-32.4	0.2062	-32.5	0.2318
-32.5	0.0353	-32.4	0.1062	-32.4	0.1963	-32.3	0.2076	-32.4	0.2453
-32.4	0.0466	-32.3	0.109	-32.3	0.1922	-32.2	0.202	-32.3	0.244
-32.3	0.0468	-32.2	0.1075	-32.2	0.1782	-32.1	0.1975	-32.2	0.2377
-32.2	0.0392	-32.1	0.109	-32.1	0.1741	-32	0.197	-32.1	0.2315
-32.1	0.0299	-32	0.1125	-32	0.1688	-31.9	0.1799	-32	0.2243
-32	0.0273	-31.9	0.1155	-31.9	0.1645	-31.8	0.1742	-31.9	0.2212
-31.9	0.0283	-31.8	0.111	-31.8	0.1549	-31.7	0.1685	-31.8	0.2097
-31.8	0.0325	-31.7	0.1116	-31.7	0.1507	-31.6	0.1566	-31.7	0.2101
-31.7	0.0339	-31.6	0.1103	-31.6	0.1428	-31.5	0.1548	-31.6	0.1951
-31.6	0.0237	-31.5	0.111	-31.5	0.1335	-31.4	0.1602	-31.5	0.1853
-31.5	0.0281	-31.4	0.105	-31.4	0.1251	-31.3	0.151	-31.4	0.1847
-31.4	0.0342999	-31.3	0.0999001	-31.3	0.119	-31.2	0.1467	-31.3	0.1759
-31.3	0.0291	-31.2	0.0954	-31.2	0.1143	-31.1	0.1422	-31.2	0.1674
-31.2	0.0304	-31.1	0.0865002	-31.1	0.1113	-31	0.1429	-31.1	0.1628
-31.1	0.027	-31	0.0837001	-31	0.1063	-30.9	0.1394	-31	0.1621
-31	0.0247	-30.9	0.0790001	-30.9	0.1074	-30.8	0.1407	-30.9	0.1618
-30.9	0.022	-30.8	0.0760001	-30.8	0.1063	-30.7	0.1395	-30.8	0.1637
-30.8	0.0221	-30.7	0.0747	-30.7	0.107	-30.6	0.1393	-30.7	0.1629
-30.7	0.0215	-30.6	0.0767001	-30.6	0.1064	-30.5	0.1358	-30.6	0.1607
-30.6	0.0194	-30.5	0.0760002	-30.5	0.1026	-30.4	0.1428	-30.5	0.1579
-30.5	0.0131001	-30.4	0.0808	-30.4	0.1102	-30.3	0.1461	-30.4	0.1627
-30.4	0.0124	-30.3	0.0819	-30.3	0.1165	-30.2	0.1519	-30.3	0.1648
-30.3	0.0101	-30.2	0.0863	-30.2	0.125	-30.1	0.157	-30.2	0.1717
-30.2	0.015	-30.1	0.0901	-30.1	0.1284	-30	0.1506	-30.1	0.1721
-30.1	0.0137	-30	0.0848001	-30	0.1302	-29.9	0.1521	-30	0.1701
-30	0.016	-29.9	0.084	-29.9	0.1291	-29.8	0.152	-29.9	0.1683
-29.9	0.018	-29.8	0.0854	-29.8	0.129	-29.7	0.1511	-29.8	0.1698
-29.8	0.0176	-29.7	0.0884	-29.7	0.1278	-29.6	0.1535	-29.7	0.1703
-29.7	0.0186	-29.6	0.0910001	-29.6	0.1265	-29.5	0.1533	-29.6	0.1704
-29.6	0.0171	-29.5	0.0888001	-29.5	0.1268	-29.4	0.1529	-29.5	0.1699
-29.5	0.018	-29.4	0.0888001	-29.4	0.1289	-29.3	0.148	-29.4	0.1666
-29.4	0.0194	-29.3	0.0838001	-29.3	0.1278	-29.2	0.1461	-29.3	0.1606
-29.3	0.0144	-29.2	0.0778	-29.2	0.1239	-29.1	0.1442	-29.2	0.1545
-29.2	0.00980001	-29.1	0.0743002	-29.1	0.1187	-29	0.1418	-29.1	0.1499
-29.1	0.0104	-29	0.0719001	-29	0.1174	-28.9	0.1384	-29	0.1498
-29	0.00809999	-28.9	0.0663001	-28.9	0.1183	-28.8	0.1426	-28.9	0.1445
-28.9	0.00769999	-28.8	0.0682	-28.8	0.1206	-28.7	0.1411	-28.8	0.1467
-28.8	0.012	-28.7	0.0629	-28.7	0.1181	-28.6	0.1381	-28.7	0.1417
-28.7	0.0116	-28.6	0.0606001	-28.6	0.1161	-28.5	0.1355	-28.6	0.1394
-28.6	0.0106	-28.5	0.0597001	-28.5	0.1159	-28.4	0.1344	-28.5	0.1338
-28.5	0.0138	-28.4	0.0607	-28.4	0.1192	-28.3	0.1366	-28.4	0.1314
-28.4	0.0149	-28.3	0.0673	-28.3	0.1246	-28.2	0.1366	-28.3	0.1329
-28.3	0.0202	-28.2	0.0715	-28.2	0.1282	-28.1	0.1301	-28.2	0.1346
-28.2	0.0219	-28.1	0.0687002	-28.1	0.1244	-28	0.1287	-28.1	0.1307
-28.1	0.0183	-28	0.0703001	-28	0.1263	-27.9	0.1273	-28	0.1268
-28	0.0181	-27.9	0.0695001	-27.9	0.1248	-27.8	0.1276	-27.9	0.1237
-27.9	0.0201	-27.8	0.0739	-27.8	0.1263	-27.7	0.121	-27.8	0.1233
-27.8	0.0255	-27.7	0.0752	-27.7	0.12	-27.6	0.119	-27.7	0.1224
-27.7	0.0252	-27.6	0.0786001	-27.6	0.1194	-27.5	0.119	-27.6	0.1223
-27.6	0.0278	-27.5	0.0805	-27.5	0.1201	-27.4	0.1158	-27.5	0.1211
-27.5	0.0316	-27.4	0.0832001	-27.4	0.1207	-27.3	0.1122	-27.4	0.1206
-27.4	0.0318	-27.3	0.0831001	-27.3	0.121	-27.2	0.1158	-27.3	0.1172
-27.3	0.032	-27.2	0.0846	-27.2	0.119	-27.1	0.1185	-27.2	0.1173
-27.2	0.0291	-27.1	0.0862	-27.1	0.1194	-27	0.1181	-27.1	0.1185
-27.1	0.0254	-27	0.0905001	-27	0.1216	-26.9	0.1158	-27	0.1199
-27	0.0229	-26.9	0.0957	-26.9	0.1238	-26.8	0.1127	-26.9	0.123
-26.9	0.0255	-26.8	0.0936001	-26.8	0.1168	-26.7	0.1125	-26.8	0.1178
-26.8	0.0212	-26.7	0.093	-26.7	0.1138	-26.6	0.1136	-26.7	0.1164
-26.7	0.0193	-26.6	0.088	-26.6	0.111	-26.5	0.1122	-26.6	0.1168
-26.6	0.0171	-26.5	0.0852001	-26.5	0.1117	-26.4	0.1153	-26.5	0.1152
-26.5	0.0165	-26.4	0.0845001	-26.4	0.1102	-26.3	0.1197	-26.4	0.1111
-26.4	0.0132	-26.3	0.0897	-26.3	0.1167	-26.2	0.1216	-26.3	0.1178
-26.3	0.0194	-26.2	0.0881	-26.2	0.1172	-26.1	0.1198	-26.2	0.1165
-26.2	0.0232	-26.1	0.0851001	-26.1	0.1134	-26	0.1165	-26.1	0.1174
-26.1	0.0228	-26	0.0818001	-26	0.1144	-25.9	0.1145	-26	0.1181
-26	0.0208	-25.9	0.0809001	-25.9	0.1163	-25.8	0.1136	-25.9	0.1162
-25.9	0.0191	-25.8	0.0795001	-25.8	0.1178	-25.7	0.1121	-25.8	0.1192
-25.8	0.0189	-25.7	0.0795	-25.7	0.1182	-25.6	0.1163	-25.7	0.1247
-25.7	0.0161	-25.6	0.0844	-25.6	0.1241	-25.5	0.1196	-25.6	0.1301
-25.6	0.0185	-25.5	0.0877	-25.5	0.1273	-25.4	0.1204	-25.5	0.1341
-25.5	0.0229	-25.4	0.0886001	-25.4	0.1299	-25.3	0.1164	-25.4	0.1381
-25.4	0.0213	-25.3	0.0879001	-25.3	0.1248	-25.2	0.1131	-25.3	0.134
-25.3	0.0184	-25.2	0.0873	-25.2	0.122	-25.1	0.1112	-25.2	0.134
-25.2	0.014	-25.1	0.0887001	-25.1	0.1236	-25	0.1148	-25.1	0.1351
-25.1	0.0173	-25	0.0917	-25	0.1257	-24.9	0.1151	-25	0.1375
-25	0.0201	-24.9	0.0939	-24.9	0.1286	-24.8	0.1142	-24.9	0.1404
-24.9	0.0221	-24.8	0.0998	-24.8	0.1307	-24.7	0.1127	-24.8	0.1411
-24.8	0.024	-24.7	0.1014	-24.7	0.1314	-24.6	0.1123	-24.7	0.1405
-24.7	0.0235	-24.6	0.1021	-24.6	0.1294	-24.5	0.1123	-24.6	0.1386
-24.6	0.0247	-24.5	0.1043	-24.5	0.1276	-24.4	0.1122	-24.5	0.1391
-24.5	0.026	-24.4	0.1076	-24.4	0.1269	-24.3	0.1114	-24.4	0.1371
-24.4	0.0264	-24.3	0.107	-24.3	0.1264	-24.2	0.1138	-24.3	0.1359
-24.3	0.0263	-24.2	0.1105	-24.2	0.126	-24.1	0.1168	-24.2	0.1326
-24.2	0.0306	-24.1	0.1124	-24.1	0.1288	-24	0.1157	-24.1	0.1332
-24.1	0.0332	-24	0.1092	-24	0.1257	-23.9	0.1146	-24	0.1303
-24	0.0305	-23.9	0.1084	-23.9	0.1253	-23.8	0.1199	-23.9	0.1291
-23.9	0.0298	-23.8	0.1103	-23.8	0.131	-23.7	0.1199	-23.8	0.1339
-23.8	0.0352	-23.7	0.1105	-23.7	0.1338	-23.6	0.1168	-23.7	0.1355
-23.7	0.0336	-23.6	0.1122	-23.6	0.1343	-23.5	0.1153	-23.6	0.1367
-23.6	0.0323	-23.5	0.1144	-23.5	0.1339	-23.4	0.1163	-23.5	0.1383
-23.5	0.0326	-23.4	0.1141	-23.4	0.1334	-23.3	0.1127	-23.4	0.1387
-23.4	0.0361	-23.3	0.1115	-23.3	0.1325	-23.2	0.1154	-23.3	0.1415
-23.3	0.0346	-23.2	0.1127	-23.2	0.137	-23.1	0.1164	-23.2	0.1469
-23.2	0.0363	-23.1	0.1172	-23.1	0.1375	-23	0.1196	-23.1	0.1519
-23.1	0.0363	-23	0.1213	-23	0.1388	-22.9	0.1184	-23	0.1551
-23	0.0414	-22.9	0.1232	-22.9	0.1387	-22.8	0.1158	-22.9	0.1559
-22.9	0.0452	-22.8	0.1268	-22.8	0.1403	-22.7	0.112	-22.8	0.1562
-22.8	0.0449	-22.7	0.1268	-22.7	0.1399	-22.6	0.1138	-22.7	0.1568
-22.7	0.0431	-22.6	0.129	-22.6	0.1389	-22.5	0.1198	-22.6	0.1571
-22.6	0.0429	-22.5	0.129	-22.5	0.137	-22.4	0.1171	-22.5	0.1556
-22.5	0.0447	-22.4	0.1304	-22.4	0.1356	-22.3	0.1218	-22.4	0.156
-22.4	0.0432	-22.3	0.1382	-22.3	0.1388	-22.2	0.1237	-22.3	0.1652
-22.3	0.0532	-22.2	0.1381	-22.2	0.142	-22.1	0.1231	-22.2	0.1696
-22.2	0.0534	-22.1	0.1371	-22.1	0.1439	-22	0.1214	-22.1	0.1703
-22.1	0.0438	-22	0.1274	-22	0.1474	-21.9	0.1278	-22	0.1658
-22	0.0395	-21.9	0.1299	-21.9	0.1566	-21.8	0.1294	-21.9	0.1725
-21.9	0.0493	-21.8	0.123	-21.8	0.1581	-21.7	0.1351	-21.8	0.1728
-21.8	0.0543	-21.7	0.1211	-21.7	0.1615	-21.6	0.1441	-21.7	0.1746
-21.7	0.057	-21.6	0.1296	-21.6	0.174	-21.5	0.1463	-21.6	0.184
-21.6	0.0721	-21.5	0.1383	-21.5	0.1774	-21.4	0.1367	-21.5	0.1886
-21.5	0.0816	-21.4	0.1383	-21.4	0.1778	-21.3	0.1283	-21.4	0.195
-21.4	0.074	-21.3	0.1341	-21.3	0.1783	-21.2	0.1207	-21.3	0.1962
-21.3	0.0618	-21.2	0.1223	-21.2	0.1731	-21.1	0.1162	-21.2	0.1836
-21.2	0.0529	-21.1	0.1188	-21.1	0.1734	-21	0.1119	-21.1	0.1788
-21.1	0.0478	-21	0.1226	-21	0.1755	-20.9	0.1107	-21	0.1774
-21	0.0448	-20.9	0.13	-20.9	0.1758	-20.8	0.1162	-20.9	0.1764
-20.9	0.0436	-20.8	0.1358	-20.8	0.1824	-20.7	0.1136	-20.8	0.1782
-20.8	0.0552	-20.7	0.1316	-20.7	0.1813	-20.6	0.1145	-20.7	0.1726
-20.7	0.0526	-20.6	0.1313	-20.6	0.1836	-20.5	0.1203	-20.6	0.1637
-20.6	0.0504	-20.5	0.1324	-20.5	0.1841	-20.4	0.1196	-20.5	0.1623
-20.5	0.0504	-20.4	0.1361	-20.4	0.1839	-20.3	0.1248	-20.4	0.1675
-20.4	0.051	-20.3	0.1438	-20.3	0.1868	-20.2	0.1259	-20.3	0.1724
-20.3	0.0554	-20.2	0.1409	-20.2	0.1768	-20.1	0.133	-20.2	0.1697
-20.2	0.0588	-20.1	0.1442	-20.1	0.1814	-20	0.1317	-20.1	0.1715
-20.1	0.0671	-20	0.1388	-20	0.1782	-19.9	0.13	-20	0.1674
-20	0.0676	-19.9	0.1337	-19.9	0.1773	-19.8	0.1288	-19.9	0.1664
-19.9	0.0603	-19.8	0.1321	-19.8	0.1735	-19.7	0.1221	-19.8	0.1675
-19.8	0.0617	-19.7	0.1224	-19.7	0.1662	-19.6	0.1151	-19.7	0.1647
-19.7	0.0531	-19.6	0.1175	-19.6	0.1647	-19.5	0.117	-19.6	0.1675
-19.6	0.0533	-19.5	0.1111	-19.5	0.1593	-19.4	0.1184	-19.5	0.1642
-19.5	0.0523	-19.4	0.1043	-19.4	0.1531	-19.3	0.1135	-19.4	0.1628
-19.4	0.0467	-19.3	0.0986002	-19.3	0.1451	-19.2	0.1036	-19.3	0.1626
-19.3	0.0473	-19.2	0.0926	-19.2	0.1426	-19.1	0.1023	-19.2	0.155
-19.2	0.0383	-19.1	0.0947001	-19.1	0.1437	-19	0.1071	-19.1	0.1598
-19.1	0.0362	-19	0.0909001	-19	0.1491	-18.9	0.1027	-19	0.1601
-19	0.0336	-18.9	0.0846002	-18.9	0.1423	-18.8	0.1039	-18.9	0.148
-18.9	0.029	-18.8	0.0810002	-18.8	0.137	-18.7	0.1025	-18.8	0.1392
-18.8	0.02	-18.7	0.0752	-18.7	0.1288	-18.6	0.1007	-18.7	0.1314
-18.7	0.0163	-18.6	0.0695001	-18.6	0.1216	-18.5	0.0952	-18.6	0.1289
-18.6	0.0114	-18.5	0.0621001	-18.5	0.121	-18.4	0.0912	-18.5	0.1209
-18.5	0.0105	-18.4	0.054	-18.4	0.1115	-18.3	0.0862	-18.4	0.108
-18.4	0.00310003	-18.3	0.062	-18.3	0.104	-18.2	0.0835999	-18.3	0.0962
-18.3	0.00570001	-18.2	0.0714	-18.2	0.103	-18.1	0.0808999	-18.2	0.089
-18.2	0.00730002	-18.1	0.0732001	-18.1	0.1023	-18	0.0799	-18.1	0.0870001
-18.1	0.00659998	-18	0.0718001	-18	0.106	-17.9	0.0826	-18	0.0876001
-18	0.00359998	-17.9	0.0714	-17.9	0.1049	-17.8	0.0852	-17.9	0.0857
-17.9	0.00229997	-17.8	0.0732	-17.8	0.1025	-17.7	0.0829	-17.8	0.0825
-17.8	0.00760001	-17.7	0.0734	-17.7	0.1024	-17.6	0.0793001	-17.7	0.0768
-17.7	0.00860001	-17.6	0.068	-17.6	0.1048	-17.5	0.0831	-17.6	0.0751
-17.6	0.0043	-17.5	0.0683	-17.5	0.1061	-17.4	0.0893	-17.5	0.08
-17.5	0.00330001	-17.4	0.0676	-17.4	0.0986	-17.3	0.0916	-17.4	0.0792
-17.4	-0.00269999	-17.3	0.0716999	-17.3	0.1021	-17.2	0.0880998	-17.3	0.0812999
-17.3	0.00459999	-17.2	0.0742	-17.2	0.1033	-17.1	0.0756999	-17.2	0.0844
-17.2	0.0104	-17.1	0.0669002	-17.1	0.0951002	-17	0.0683	-17.1	0.0798002
-17.1	0.00940002	-17	0.0726001	-17	0.0990001	-16.9	0.066	-17	0.0790001
-17	0.0087	-16.9	0.0669001	-16.9	0.1037	-16.8	0.0719	-16.9	0.0765001
-16.9	0.000800005	-16.8	0.0651001	-16.8	0.1035	-16.7	0.0842999	-16.8	0.0740001
-16.8	-0.00409999	-16.7	0.0652	-16.7	0.1044	-16.6	0.0847001	-16.7	0.0762
-16.7	-0.00390001	-16.6	0.0583001	-16.6	0.1012	-16.5	0.0972	-16.6	0.0689001
-16.6	-0.0122	-16.5	0.0630999	-16.5	0.1078	-16.4	0.107	-16.5	0.0725999
-16.5	-0.00719999	-16.4	0.0727998	-16.4	0.1121	-16.3	0.1106	-16.4	0.0739998
-16.4	-0.00529999	-16.3	0.0788999	-16.3	0.1175	-16.2	0.1143	-16.3	0.0773999
-16.3	-0.00130001	-16.2	0.0844	-16.2	0.1189	-16.1	0.1116	-16.2	0.0841
-16.2	0.00599998	-16.1	0.0906998	-16.1	0.1214	-16	0.1125	-16.1	0.0827998
-16.1	0.0102	-16	0.0985999	-16	0.1206	-15.9	0.1079	-16	0.0794999
-16	0.0107	-15.9	0.1084	-15.9	0.1226	-15.8	0.1077	-15.9	0.0794999
-15.9	0.0151	-15.8	0.1196	-15.8	0.1268	-15.7	0.0959	-15.8	0.0785999
-15.8	0.022	-15.7	0.1208	-15.7	0.1229	-15.6	0.0947999	-15.7	0.0698
-15.7	0.0256	-15.6	0.1274	-15.6	0.1298	-15.5	0.0853	-15.6	0.0699
-15.6	0.0271	-15.5	0.1278	-15.5	0.132	-15.4	0.0846	-15.5	0.0660001
-15.5	0.0242	-15.4	0.1318	-15.4	0.139	-15.3	0.0768	-15.4	0.068
-15.4	0.027	-15.3	0.1338	-15.3	0.1399	-15.2	0.0716999	-15.3	0.0664
-15.3	0.0296	-15.2	0.1362	-15.2	0.1384	-15.1	0.0718999	-15.2	0.0622
-15.2	0.0321	-15.1	0.1333	-15.1	0.1349	-15	0.0632	-15.1	0.0551001
-15.1	0.0272	-15	0.1272	-15	0.1343	-14.9	0.0606	-15	0.0536001
-15	0.0252	-14.9	0.1265	-14.9	0.1367	-14.8	0.0783	-14.9	0.0500001
-14.9	0.0229	-14.8	0.1243	-14.8	0.1316	-14.7	0.0912998	-14.8	0.0475001
-14.8	0.0182	-14.7	0.1052	-14.7	0.1181	-14.6	0.0930998	-14.7	0.0559
-14.7	0.0305	-14.6	0.0935002	-14.6	0.1281	-14.5	0.0813	-14.6	0.0486002
-14.6	0.0143	-14.5	0.0850002	-14.5	0.123	-14.4	0.0807	-14.5	0.0499002
-14.5	0.0134	-14.4	0.092	-14.4	0.1411	-14.3	0.0735	-14.4	0.0636
-14.4	0.0278	-14.3	0.0770002	-14.3	0.1297	-14.2	0.0856	-14.3	0.0656002
-14.3	0.0232	-14.2	0.0844	-14.2	0.1328	-14.1	0.0884	-14.2	0.0836
-14.2	0.0272	-14.1	0.0846	-14.1	0.1381	-14	0.0929	-14.1	0.088
-14.1	0.0328	-14	0.0788	-14	0.147	-13.9	0.088	-14	0.0983
-14	0.0391	-13.9	0.0749001	-13.9	0.1446	-13.8	0.0839	-13.9	0.1016
-13.9	0.0403	-13.8	0.0672001	-13.8	0.1394	-13.7	0.0826999	-13.8	0.1033
-13.8	0.0376	-13.7	0.0638	-13.7	0.137	-13.6	0.0789997	-13.7	0.1053
-13.7	0.0365	-13.6	0.0640001	-13.6	0.1355	-13.5	0.0618	-13.6	0.1017
-13.6	0.0335	-13.5	0.0559003	-13.5	0.1207	-13.4	0.0427	-13.5	0.0896003
-13.5	0.02	-13.4	0.0430003	-13.4	0.106	-13.3	0.0269	-13.4	0.0710003
-13.4	0.0039	-13.3	0.0403	-13.3	0.1044	-13.2	0.0144	-13.3	0.0639
-13.3	-0.0038	-13.2	0.0408	-13.2	0.0925	-13.1	0.012	-13.2	0.065
-13.2	-0.0027	-13.1	0.0544	-13.1	0.0958	-13	0.0255	-13.1	0.077
-13.1	0.0073	-13	0.0638	-13	0.0995	-12.9	0.0413	-13	0.0916
-13	0.0191	-12.9	0.0778999	-12.9	0.1154	-12.8	0.0472	-12.9	0.1092
-12.9	0.0309	-12.8	0.0807	-12.8	0.1254	-12.7	0.0498998	-12.8	0.1136
-12.8	0.0343	-12.7	0.0806	-12.7	0.1269	-12.6	0.0424997	-12.7	0.1134
-12.7	0.0349	-12.6	0.0725002	-12.6	0.1181	-12.5	0.0285	-12.6	0.1082
-12.6	0.0245	-12.5	0.0628003	-12.5	0.1061	-12.4	0.0101	-12.5	0.0990003
-12.5	0.0125	-12.4	0.0475003	-12.4	0.0897003	-12.3	0.00409999	-12.4	0.0855003
-12.4	0.00120001	-12.3	0.0417003	-12.3	0.0819003	-12.2	-0.00350033	-12.3	0.0743003
-12.3	-0.00490001	-12.2	0.0303	-12.2	0.0745	-12.1	-0.0131003	-12.2	0.0617
-12.2	-0.0176	-12.1	0.0231003	-12.1	0.0665003	-12	-0.0199	-12.1	0.0481003
-12.1	-0.0275	-12	0.0187003	-12	0.0589003	-11.9	-0.0271	-12	0.0349003
-12	-0.0341	-11.9	0.0137004	-11.9	0.0475004	-11.8	-0.0276	-11.9	0.0191004
-11.9	-0.0424	-11.8	0.00820028	-11.8	0.0445003	-11.7	-0.0265002	-11.8	0.00820028
-11.8	-0.0442	-11.7	0.0141	-11.7	0.048	-11.6	-0.0259001	-11.7	0.00399999
-11.7	-0.041	-11.6	0.0167002	-11.6	0.0463002	-11.5	-0.0249	-11.6	0.000900183
-11.6	-0.0409	-11.5	0.0207001	-11.5	0.0491001	-11.4	-0.0173	-11.5	-0.000999881
-11.5	-0.0414	-11.4	0.0245001	-11.4	0.0498001	-11.3	-0.0127	-11.4	-0.000499935
-11.4	-0.037	-11.3	0.0278001	-11.3	0.0501001	-11.2	-0.00970007	-11.3	-0.000699914
-11.3	-0.0323	-11.2	0.0322	-11.2	0.0537	-11.1	-0.0087002	-11.2	0.0063
-11.2	-0.0263	-11.1	0.0342001	-11.1	0.0554001	-11	-0.0124	-11.1	0.0100001
-11.1	-0.0248	-11	0.0264002	-11	0.0469002	-10.9	-0.0113	-11	0.0080002
-11	-0.0321	-10.9	0.0197002	-10.9	0.0404002	-10.8	-0.0103	-10.9	0.00400017
-10.9	-0.0357	-10.8	0.0165001	-10.8	0.0349001	-10.7	-0.00660007	-10.8	0.00680008
-10.8	-0.0348	-10.7	0.0194	-10.7	0.0303	-10.6	-0.000500054	-10.7	0.012
-10.7	-0.0321	-10.6	0.0198001	-10.6	0.0307001	-10.5	0.0017	-10.6	0.0112001
-10.6	-0.0283	-10.5	0.0208	-10.5	0.0314	-10.4	-0.0015	-10.5	0.0148
-10.5	-0.0267	-10.4	0.0162001	-10.4	0.0304001	-10.3	0.0015	-10.4	0.0142001
-10.4	-0.0292	-10.3	0.0200001	-10.3	0.0297001	-10.2	0.00169989	-10.3	0.0176001
-10.3	-0.028	-10.2	0.0187	-10.2	0.0332	-10.1	0.0018999	-10.2	0.0187
-10.2	-0.0268	-10.1	0.0175001	-10.1	0.0319001	-10	0.0058	-10.1	0.0156001
-10.1	-0.0293	-10	0.0184001	-10	0.0324001	-9.9	0.004	-10	0.0165001
-10	-0.0303	-9.9	0.0165001	-9.9	0.0322001	-9.8	0.00699999	-9.9	0.0132001
-9.9	-0.0321	-9.8	0.00830014	-9.8	0.0324001	-9.7	0.00479984	-9.8	0.00830014
-9.8	-0.0318	-9.7	-0.000499994	-9.7	0.0266	-9.6	0.00169989	-9.7	0.00350001
-9.7	-0.0325	-9.6	-0.00399984	-9.6	0.0170002	-9.5	-0.000900003	-9.6	0.00160016
-9.6	-0.0417	-9.5	-0.00859988	-9.5	0.0180001	-9.4	0.000999995	-9.5	0.00120012
-9.5	-0.0447	-9.4	-0.00489995	-9.4	0.0214001	-9.3	-0.000399997	-9.4	0.00510005
-9.4	-0.0454	-9.3	-0.00529986	-9.3	0.0174001	-9.2	0.00809984	-9.3	0.00430014
-9.3	-0.044	-9.2	-0.0069	-9.2	0.0165	-9.1	0.00549988	-9.2	0.0055
-9.2	-0.0435	-9.1	-0.00719984	-9.1	0.0113002	-9	0.002	-9.1	0.00480016
-9.1	-0.0457	-9	-0.0130999	-9	0.0114001	-8.9	0.0028	-9	0.00440011
-9	-0.0455	-8.9	-0.0127999	-8.9	0.00960012	-8.8	-0.0018	-8.9	-0.000199879
-8.9	-0.0437	-8.8	-0.0136999	-8.8	0.00780013	-8.7	-0.00920014	-8.8	-0.00729987
-8.8	-0.041	-8.7	-0.0164	-8.7	0.0049	-8.6	-0.0116001	-8.7	-0.0145
-8.7	-0.0406	-8.6	-0.0203999	-8.6	0.000400141	-8.5	-0.0123	-8.6	-0.0219999
-8.6	-0.0402	-8.5	-0.0267999	-8.5	-0.00609985	-8.4	-0.0058	-8.5	-0.0284999
-8.5	-0.0421	-8.4	-0.0245	-8.4	-0.000800017	-8.3	-0.0013	-8.4	-0.0239
-8.4	-0.0352	-8.3	-0.0201	-8.3	0.0126	-8.2	-0.00650001	-8.3	-0.0203
-8.3	-0.0265	-8.2	-0.02	-8.2	0.0062	-8.1	-0.00789995	-8.2	-0.0146
-8.2	-0.0275	-8.1	-0.0132	-8.1	-0.00399999	-8	-0.0067	-8.1	-0.00669999
-8.1	-0.0318	-8	-0.0161	-8	-0.00510005	-7.9	-0.004	-8	0.0105
-8	-0.0311	-7.9	-0.00970003	-7.9	-0.0122	-7.8	-0.0066	-7.9	0.00899997
-7.9	-0.0313	-7.8	0.000799982	-7.8	-0.00880002	-7.7	-0.00780001	-7.8	0.00879998
-7.8	-0.0315	-7.7	0.0017	-7.7	-0.0119	-7.6	-0.00590002	-7.7	0.0089
-7.7	-0.0326	-7.6	0.00520001	-7.6	-0.00849999	-7.5	-0.0037	-7.6	0.00850001
-7.6	-0.0289	-7.5	0.0102	-7.5	-0.00439998	-7.4	-0.0033	-7.5	0.0113
-7.5	-0.0251	-7.4	0.00830007	-7.4	-0.00449993	-7.3	-0.0044	-7.4	0.0137001
-7.4	-0.0237	-7.3	0.00920006	-7.3	-0.00509994	-7.2	-0.00360002	-7.3	0.0126001
-7.3	-0.0224	-7.2	0.0106	-7.2	-0.0018	-7.1	-0.00220007	-7.2	0.0109
-7.2	-0.0214	-7.1	0.0103	-7.1	0.00200002	-7	-0.004	-7.1	0.0132
-7.1	-0.0191	-7	0.00740007	-7	0.000100071	-6.9	-0.0049	-7	0.0119001
-7	-0.0181	-6.9	0.00480008	-6.9	-0.00139992	-6.8	-0.0068	-6.9	0.00960008
-6.9	-0.0149	-6.8	0.00580005	-6.8	-0.00589995	-6.7	-0.00620007	-6.8	0.00690005
-6.8	-0.0122	-6.7	0.0085	-6.7	-0.0098	-6.6	-0.00780005	-6.7	0.0041
-6.7	-0.0105	-6.6	0.00890007	-6.6	-0.0121999	-6.5	-0.0054	-6.6	0.00410007
-6.6	-0.0105	-6.5	0.0131	-6.5	-0.0119	-6.4	-0.0042	-6.5	0.00840005
-6.5	-0.0092	-6.4	0.0154001	-6.4	-0.0126999	-6.3	-0.0052	-6.4	0.0104001
-6.4	-0.0116	-6.3	0.0158001	-6.3	-0.0122999	-6.2	-0.00510002	-6.3	0.00680009
-6.3	-0.0109	-6.2	0.0145	-6.2	-0.0109	-6.1	-0.00450001	-6.2	0.007
-6.2	-0.0108	-6.1	0.0144	-6.1	-0.0104	-6	-0.0016	-6.1	0.00990002
-6.1	-0.0116	-6	0.0176	-6	-0.00879999	-5.9	0.0013	-6	0.00930001
-6	-0.012	-5.9	0.0231	-5.9	-0.00740001	-5.8	0.0016	-5.9	0.0109
-5.9	-0.0078	-5.8	0.0241	-5.8	-0.00629997	-5.7	0.00469996	-5.8	0.0114
-5.8	-0.002	-5.7	0.023	-5.7	-0.0045	-5.6	0.00899998	-5.7	0.0097
-5.7	0.001	-5.6	0.02	-5.6	-0.00229996	-5.5	0.0118	-5.6	0.00960004
-5.6	0.0034	-5.5	0.0163	-5.5	-0.00339998	-5.4	0.0068	-5.5	0.00950002
-5.5	0.0073	-5.4	0.0154001	-5.4	-0.00369994	-5.3	0.0019	-5.4	0.00860006
-5.4	0.0091	-5.3	0.00900013	-5.3	-0.00359987	-5.2	0.000199889	-5.3	0.00380013
-5.3	0.0077	-5.2	0.0042	-5.2	-0.0028	-5.1	-0.0034	-5.2	0.0028
-5.2	0.0042	-5.1	-0.00119989	-5.1	-0.00539989	-5	0	-5.1	-0.00309989
-5.1	-0.0016	-5	-9.99981e-05	-5	1.90735e-09	-4.9	0.00139998	-5	1.90735e-09
-5	0	-4.9	0.0021	-4.9	0.0006	-4.8	0.0025	-4.9	-0.0001
-4.9	-0.0011	-4.8	0.00190003	-4.8	0.00380003	-4.7	-0.0006	-4.8	0.000700034
-4.8	0.0041	-4.7	0.0003	-4.7	0.0063	-4.6	-0.0076	-4.7	-0.0012
-4.7	0.0078	-4.6	-0.00369977	-4.6	0.00110023	-4.5	-0.0127	-4.6	-0.00559977
-4.6	0.0032	-4.5	-0.006	-4.5	0.0019	-4.4	-0.0142002	-4.5	-0.0055
-4.5	0.0041	-4.4	-0.0072	-4.4	0.0022	-4.3	-0.0201	-4.4	-0.0082
-4.4	0.0043	-4.3	-0.00959978	-4.3	-0.00139978	-4.2	-0.0182	-4.3	-0.0104998
-4.3	0.0024	-4.2	-0.0045	-4.2	0.0014	-4.1	-0.0198	-4.2	-0.0067
-4.2	0.0048	-4.1	-0.00469987	-4.1	-0.00229987	-4	-0.02	-4.1	-0.00789987
-4.1	0.000499999	-4	-0.0058	-4	-0.0038	-3.9	-0.0204001	-4	-0.0072
-4	0.000300001	-3.9	-0.0055	-3.9	-0.0056	-3.8	-0.0185	-3.9	-0.0025
-3.9	0.0041	-3.8	-0.00409994	-3.8	-0.00619994	-3.7	-0.0204	-3.8	-0.000699942
-3.8	0.007	-3.7	0.0022	-3.7	-0.0041	-3.6	-0.0231	-3.7	0.000599999
-3.7	0.0134	-3.6	0.00280024	-3.6	-0.00579976	-3.5	-0.0296	-3.6	0.00120024
-3.6	0.0123	-3.5	-0.0055	-3.5	-0.0167	-3.4	-0.0224999	-3.5	-0.012
-3.5	0.0021	-3.4	-0.0033	-3.4	-0.0155	-3.3	-0.0206	-3.4	-0.0119
-3.4	0.003	-3.3	-0.00360012	-3.3	-0.0140001	-3.2	-0.0098	-3.3	-0.0150001
-3.3	0.0121	-3.2	-0.0083	-3.2	-0.0069	-3.1	-0.000599998	-3.2	-0.0155
-3.2	0.0153	-3.1	-0.00440017	-3.1	0.00189983	-3	-0.0089	-3.1	-0.0111002
-3.1	0.0237	-3	-0.0042	-3	-0.0053	-2.9	-0.0105	-3	-0.0133
-3	0.0212	-2.9	-0.0038	-2.9	-0.0034	-2.8	-0.0107	-2.9	-0.0166
-2.9	0.0187	-2.8	-0.00650003	-2.8	-0.00100003	-2.7	-0.0134	-2.8	-0.0128
-2.8	0.0203	-2.7	-0.0045	-2.7	0.0025	-2.6	-0.0085	-2.7	-0.015
-2.7	0.0212	-2.6	-0.00430001	-2.6	0.00179999	-2.5	-0.0102	-2.6	-0.0148
-2.6	0.0242	-2.5	-0.0042	-2.5	0.0015	-2.4	-0.0136001	-2.5	-0.0146
-2.5	0.0253	-2.4	-0.006	-2.4	-0.000499999	-2.3	-0.0175	-2.4	-0.014
-2.4	0.0215	-2.3	-0.00929989	-2.3	-0.00169989	-2.2	-0.0258	-2.3	-0.00819989
-2.3	0.0192	-2.2	-0.0106	-2.2	-0.0107	-2.1	-0.0231	-2.2	-0.0168
-2.2	0.0162	-2.1	-0.00559989	-2.1	-0.0131999	-2	-0.0151	-2.1	-0.0169999
-2.1	0.017	-2	-0.0051	-2	-0.0141	-1.9	-0.0128003	-2	-0.0153
-2	0.0213	-1.9	-0.012	-1.9	-0.01	-1.8	-0.0214	-1.9	-0.0169
-1.9	0.0182	-1.8	-0.0105997	-1.8	-0.00589974	-1.7	-0.0234	-1.8	-0.0154997
-1.8	0.0165	-1.7	-0.0151	-1.7	-0.0135	-1.6	-0.0373	-1.7	-0.0189
-1.7	0.0143	-1.6	-0.0271994	-1.6	-0.0268994	-1.5	-0.0384	-1.6	-0.0287994
-1.6	0.0057	-1.5	-0.0346	-1.5	-0.0295	-1.4	-0.0416004	-1.5	-0.0298
-1.5	0.0087	-1.4	-0.0311	-1.4	-0.0327	-1.3	-0.0476	-1.4	-0.0229996
-1.4	0.0055	-1.3	-0.0278996	-1.3	-0.0369996	-1.2	-0.0476	-1.3	-0.021
-1.3	0.00140001	-1.2	-0.0238	-1.2	-0.0418	-1.1	-0.0488	-1.2	-0.021
-1.2	0.0055	-1.1	-0.00309994	-1.1	-0.0471999	-1	-0.0476	-1.1	-0.0192999
-1.1	0.0055	-1	0.0104	-1	-0.0488	-0.899998	-0.0447008	-1	-0.0178
-1	0.0022	-0.900002	0.0104	-0.900002	-0.0555	-0.799999	-0.0447008	-0.900002	-0.0178
-0.900002	0.0022	-0.800003	0.0104	-0.800003	-0.0766992	-0.700001	-0.0447008	-0.800003	-0.0178
-0.799999	0.0022	-0.700001	0.0113	-0.700001	-0.0555	-0.599998	-0.0416004	-0.700001	-0.0106992
-0.700001	0.0055	-0.600002	0.0206008	-0.600002	-0.0488	-0.5	-0.0384	-0.600002	-0.00699999
-0.599998	0.00550001	-0.5	0.0281002	-0.5	-0.0471999	-0.399998	-0.0384	-0.5	-0.00279925
-0.5	0.0087	-0.400002	0.0283007	-0.400002	-0.0418	-0.299999	-0.0341	-0.400002	0.00670016
-0.400002	0.015	-0.300003	0.0307	-0.300003	-0.0369996	-0.200001	-0.0313	-0.300003	0.00800001
-0.299999	0.0178	-0.200001	0.0453	-0.200001	-0.0327	-0.0999985	-0.0292002	-0.200001	0.0105
-0.200001	0.0243	-0.100002	0.0536	-0.100002	-0.0295	0	-0.00539999	-0.100002	0.0326
-0.0999985	0.0248	0	1.5077	0	0.9872	0.100002	0.902259	0	1.5446
0	1.4634	0.0999985	1.5642	0.0999985	1.7831	0.200001	2.9883	0.0999985	3.3275
0.0999985	1.7649	0.199997	5.20474	0.199997	5.49624	0.299999	9.9648	0.199997	8.93014
0.200001	4.6922	0.299999	9.4997	0.299999	11.0048	0.400002	15.1561	0.299999	16.8801
0.299999	7.9047	0.399998	11.7629	0.399998	14.2719	0.5	19.7282	0.399998	24.4946
0.400002	9.2589	0.5	13.2511	0.5	17.069	0.600002	25.6403	0.5	34.9808
0.5	10.1711	0.599998	14.6311	0.599998	20.3659	0.700001	33.3189	0.599998	49.6059
0.599998	10.57	0.699997	16.3837	0.699997	24.1259	0.799999	42.9586	0.699997	68.8571
0.700001	11.1756	0.799999	18.3129	0.799999	28.5596	0.900002	54.1421	0.799999	91.7459
0.799999	11.6018	0.899998	20.9189	0.899998	34.8397	1	66.9822	0.899998	117.196
0.900002	12.6922	1	23.7254	1	41.3189	1.1	80.4397	1	144.795
1	13.7922	1.1	26.5903	1.1	47.9391	1.2	94.089	1.1	173.141
1.1	14.5829	1.2	29.0888	1.2	54.2667	1.3	108.94	1.2	201.216
1.2	14.9314	1.3	32.8201	1.3	61.6291	1.4	123.38	1.3	229.603
1.3	16.666	1.4	36.0803	1.4	69.0173	1.5	139.07	1.4	257.313
1.4	17.5662	1.5	40.3663	1.5	77.3962	1.6	154.975	1.5	284.695
1.5	19.8966	1.6	45.0626	1.6	86.0726	1.7	169.976	1.6	311.368
1.6	22.3982	1.7	49.4599	1.7	94.4698	1.8	184.932	1.7	336.103
1.7	24.6985	1.8	54.1717	1.8	102.837	1.9	199.518	1.8	359.653
1.8	27.0666	1.9	58.6587	1.9	111.285	2	213.662	1.9	381.686
1.9	29.6071	2	63.3032	2	119.303	2.1	227.252	2	402.215
2	31.7061	2.1	67.7443	2.1	127.44	2.2	240.229	2.1	421.466
2.1	34.1781	2.2	72.3332	2.2	135.55	2.3	253.031	2.2	439.622
2.2	36.6057	2.3	76.7979	2.3	143.358	2.4	265.339	2.3	456.558
2.3	39.0384	2.4	81.3161	2.4	151.069	2.5	276.962	2.4	472.316
2.4	41.4538	2.5	85.6529	2.5	158.359	2.6	288.351	2.5	487.011
2.5	43.6673	2.6	90.0558	2.6	165.738	2.7	299.21	2.6	500.871
2.6	46.0434	2.7	94.21	2.7	172.894	2.8	309.721	2.7	513.765
2.7	48.246	2.8	98.635	2.8	180.118	2.9	319.941	2.8	526.156
2.8	50.6449	2.9	102.906	2.9	186.983	3	329.656	2.9	537.937
2.9	52.9634	3	107.152	3	193.754	3.1	339.033	3	548.917
3	55.209	3.1	111.332	3.1	200.336	3.2	348.13	3.1	559.503
3.1	57.4409	3.2	115.57	3.2	206.983	3.3	356.936	3.2	569.541
3.2	59.7442	3.3	119.697	3.3	213.466	3.4	365.379	3.3	579.044
3.3	62.0022	3.4	123.759	3.4	219.896	3.5	373.509	3.4	588.183
3.4	64.2237	3.5	127.751	3.5	225.975	3.6	381.412	3.5	596.84
3.5	66.4637	3.6	131.757	3.6	232.003	3.7	389.089	3.6	605.109
3.6	68.6327	3.7	135.697	3.7	237.942	3.8	396.342	3.7	613.181
3.7	70.8263	3.8	139.639	3.8	243.758	3.9	403.506	3.8	620.898
3.8	73.0257	3.9	143.507	3.9	249.449	4	410.57	3.9	628.287
3.9	75.237	4	147.422	4	255.019	4.1	417.254	4	635.564
4	77.3954	4.1	151.252	4.1	260.556	4.2	423.648	4.1	642.488
4.1	79.5626	4.2	154.99	4.2	265.97	4.3	430.038	4.2	649.122
4.2	81.7014	4.3	158.781	4.3	271.271	4.4	436.137	4.3	655.543
4.3	83.862	4.4	162.474	4.4	276.45	4.5	442.191	4.4	661.885
4.4	85.9899	4.5	166.166	4.5	281.54	4.6	447.958	4.5	667.951
4.5	88.1091	4.6	169.83	4.6	286.538	4.7	453.602	4.6	673.998
4.6	90.2213	4.7	173.465	4.7	291.428	4.8	459.095	4.7	679.733
4.7	92.3307	4.8	177.086	4.8	296.239	4.9	464.562	4.8	685.446
4.8	94.4291	4.9	180.686	4.9	300.968	5	469.698	4.9	690.894
4.9	96.4944	5	184.195	5	305.566	5.1	474.79	5	696.278
5	98.5512	5.1	187.732	5.1	310.18	5.2	479.722	5.1	701.55
5.1	100.602	5.2	191.151	5.2	314.658	5.3	484.565	5.2	706.701
5.2	102.653	5.3	194.574	5.3	318.992	5.4	489.327	5.3	711.707
5.3	104.69	5.4	197.974	5.4	323.355	5.5	493.953	5.4	716.604
5.4	106.715	5.5	201.336	5.5	327.572	5.6	498.458	5.5	721.441
5.5	108.736	5.6	204.659	5.6	331.813	5.7	502.843	5.6	726.156
5.6	110.75	5.7	207.961	5.7	335.899	5.8	507.124	5.7	730.789
5.7	112.747	5.8	211.231	5.8	339.861	5.9	511.286	5.8	735.314
5.8	114.725	5.9	214.458	5.9	343.835	6	515.332	5.9	739.766
5.9	116.69	6	217.66	6	347.672	6.1	519.397	6	744.145
6	118.642	6.1	220.828	6.1	351.553	6.2	523.373	6.1	748.422
6.1	120.586	6.2	223.969	6.2	355.231	6.3	527.267	6.2	752.621
6.2	122.512	6.3	227.07	6.3	358.929	6.4	531	6.3	756.691
6.3	124.428	6.4	230.128	6.4	362.509	6.5	534.646	6.4	760.784
6.4	126.32	6.5	233.163	6.5	366.055	6.6	538.178	6.5	764.731
6.5	128.2	6.6	236.16	6.6	369.595	6.7	541.698	6.6	768.667
6.6	130.068	6.7	239.124	6.7	372.976	6.8	545.178	6.7	772.54
6.7	131.926	6.8	242.068	6.8	376.353	6.9	548.623	6.8	776.371
6.8	133.777	6.9	244.931	6.9	379.66	7	552.026	6.9	780.151
6.9	135.618	7	247.804	7	382.919	7.1	555.364	7	783.879
7	137.438	7.1	250.698	7.1	386.133	7.2	558.602	7.1	787.566
7.1	139.243	7.2	253.513	7.2	389.3	7.3	561.712	7.2	791.186
7.2	141.048	7.3	256.35	7.3	392.417	7.4	564.817	7.3	794.774
7.3	142.851	7.4	259.127	7.4	395.489	7.5	567.884	7.4	798.296
7.4	144.629	7.5	261.875	7.5	398.512	7.6	570.845	7.5	801.762
7.5	146.398	7.6	264.598	7.6	401.498	7.7	573.858	7.6	805.167
7.6	148.15	7.7	267.299	7.7	404.428	7.8	576.743	7.7	808.609
7.7	149.889	7.8	269.98	7.8	407.314	7.9	579.674	7.8	811.944
7.8	151.632	7.9	272.615	7.9	410.106	8	582.463	7.9	815.261
7.9	153.362	8	275.174	8	412.915	8.1	585.299	8	818.564
8	155.08	8.1	277.745	8.1	415.69	8.2	588.024	8.1	821.88
8.1	156.792	8.2	280.337	8.2	418.423	8.3	590.752	8.2	825.079
8.2	158.498	8.3	282.844	8.3	421.126	8.4	593.446	8.3	828.306
8.3	160.191	8.4	285.394	8.4	423.827	8.5	596.112	8.4	831.404
8.4	161.869	8.5	287.857	8.5	426.414	8.6	598.728	8.5	834.519
8.5	163.536	8.6	290.265	8.6	429.047	8.7	601.323	8.6	837.587
8.6	165.199	8.7	292.66	8.7	431.568	8.8	603.89	8.7	840.697
8.7	166.857	8.8	295.074	8.8	434.073	8.9	606.411	8.8	843.704
8.8	168.505	8.9	297.47	8.9	436.551	9	608.875	8.9	846.709
8.9	170.139	9	299.846	9	438.96	9.1	611.379	9	849.73
9	171.76	9.1	302.195	9.1	441.425	9.2	613.774	9.1	852.7
9.1	173.374	9.2	304.516	9.2	443.796	9.3	616.179	9.2	855.644
9.2	174.977	9.3	306.824	9.3	446.197	9.4	618.571	9.3	858.558
9.3	176.567	9.4	309.156	9.4	448.501	9.5	620.969	9.4	861.406
9.4	178.143	9.5	311.477	9.5	450.858	9.6	623.284	9.5	864.261
9.5	179.724	9.6	313.695	9.6	453.145	9.7	625.557	9.6	867.101
9.6	181.298	9.7	315.939	9.7	455.411	9.8	627.856	9.7	869.911
9.7	182.854	9.8	318.098	9.8	457.599	9.9	630.13	9.8	872.688
9.8	184.402	9.9	320.239	9.9	459.843	10	632.378	9.9	875.453
9.9	185.936	10	322.392	10	461.992	10.1	634.615	10	878.166
10	187.457	10.1	324.53	10.1	464.15	10.2	636.867	10.1	880.904
10.1	188.975	10.2	326.644	10.2	466.285	10.3	639.057	10.2	883.618
10.2	190.483	10.3	328.74	10.3	468.388	10.4	641.219	10.3	886.296
10.3	191.978	10.4	330.82	10.4	470.472	10.5	643.357	10.4	888.961
10.4	193.471	10.5	332.875	10.5	472.536	10.6	645.48	10.5	891.619
10.5	194.962	10.6	334.907	10.6	474.576	10.7	647.549	10.6	894.242
10.6	196.426	10.7	336.925	10.7	476.557	10.8	649.644	10.7	896.852
10.7	197.88	10.8	338.927	10.8	478.567	10.9	651.706	10.8	899.456
10.8	199.336	10.9	340.901	10.9	480.551	11	653.754	10.9	902.025
10.9	200.77	11	342.868	11	482.515	11.1	655.791	11	904.585
11	202.2	11.1	344.818	11.1	484.454	11.2	657.811	11.1	907.131
11.1	203.632	11.2	346.758	11.2	486.377	11.3	659.808	11.2	909.655
11.2	205.049	11.3	348.676	11.3	488.283	11.4	661.797	11.3	912.166
11.3	206.452	11.4	350.576	11.4	490.172	11.5	663.774	11.4	914.666
11.4	207.853	11.5	352.452	11.5	492.038	11.6	665.736	11.5	917.146
11.5	209.249	11.6	354.317	11.6	493.886	11.7	667.688	11.6	919.601
11.6	210.627	11.7	356.18	11.7	495.755	11.8	669.608	11.7	922.045
11.7	211.998	11.8	358.022	11.8	497.515	11.9	671.519	11.8	924.475
11.8	213.368	11.9	359.849	11.9	499.309	12	673.427	11.9	926.886
11.9	214.733	12	361.665	12	501.079	12.1	675.32	12	929.29
12	216.102	12.1	363.464	12.1	502.837	12.2	677.207	12.1	931.684
12.1	217.46	12.2	365.246	12.2	504.581	12.3	679.076	12.2	934.06
12.2	218.802	12.3	367.018	12.3	506.302	12.4	680.928	12.3	936.42
12.3	220.138	12.4	368.772	12.4	508.017	12.5	682.776	12.4	938.757
12.4	221.474	12.5	370.506	12.5	509.709	12.6	684.622	12.5	941.086
12.5	222.798	12.6	372.234	12.6	511.383	12.7	686.454	12.6	943.404
12.6	224.111	12.7	373.954	12.7	513.053	12.8	688.279	12.7	945.718
12.7	225.434	12.8	375.646	12.8	514.729	12.9	690.091	12.8	948.013
12.8	226.753	12.9	377.324	12.9	516.389	13	691.885	12.9	950.289
12.9	228.047	13	378.999	13	518.025	13.1	693.673	13	952.561
13	229.339	13.1	380.663	13.1	519.648	13.2	695.458	13.1	954.821
13.1	230.624	13.2	382.315	13.2	521.258	13.3	697.226	13.2	957.053
13.2	231.895	13.3	383.949	13.3	522.849	13.4	698.981	13.3	959.278
13.3	233.159	13.4	385.558	13.4	524.427	13.5	700.738	13.4	961.485
13.4	234.419	13.5	387.164	13.5	525.997	13.6	702.483	13.5	963.7
13.5	235.67	13.6	388.765	13.6	527.555	13.7	704.207	13.6	965.9
13.6	236.916	13.7	390.344	13.7	529.097	13.8	705.915	13.7	968.074
13.7	238.156	13.8	391.913	13.8	530.625	13.9	707.61	13.8	970.237
13.8	239.374	13.9	393.468	13.9	532.139	14	709.302	13.9	972.397
13.9	240.585	14	395.013	14	533.651	14.1	710.995	14	974.551
14	241.794	14.1	396.542	14.1	535.146	14.2	712.68	14.1	976.69
14.1	242.997	14.2	398.066	14.2	536.635	14.3	714.35	14.2	978.817
14.2	244.191	14.3	399.571	14.3	538.116	14.4	716.009	14.3	980.938
14.3	245.387	14.4	401.072	14.4	539.591	14.5	717.663	14.4	983.05
14.4	246.576	14.5	402.568	14.5	541.053	14.6	719.313	14.5	985.153
14.5	247.755	14.6	404.05	14.6	542.505	14.7	720.955	14.6	987.243
14.6	248.928	14.7	405.524	14.7	543.951	14.8	722.591	14.7	989.318
14.7	250.104	14.8	406.985	14.8	545.396	14.9	724.219	14.8	991.39
14.8	251.278	14.9	408.432	14.9	546.831	15	725.845	14.9	993.452
14.9	252.441	15	409.876	15	548.249	15.1	727.456	15	995.499
15	253.599	15.1	411.304	15.1	549.65	15.2	729.058	15.1	997.551
15.1	254.756	15.2	412.73	15.2	551.049	15.3	730.641	15.2	999.6
15.2	255.909	15.3	414.134	15.3	552.444	15.4	732.221	15.3	1001.63
15.3	257.046	15.4	415.528	15.4	553.828	15.5	733.808	15.4	1003.67
15.4	258.186	15.5	416.918	15.5	555.214	15.6	735.389	15.5	1005.69
15.5	259.321	15.6	418.306	15.6	556.593	15.7	736.955	15.6	1007.71
15.6	260.455	15.7	419.682	15.7	557.957	15.8	738.51	15.7	1009.72
15.7	261.583	15.8	421.049	15.8	559.311	15.9	740.059	15.8	1011.7
15.8	262.691	15.9	422.411	15.9	560.649	16	741.602	15.9	1013.68
15.9	263.795	16	423.758	16	561.986	16.1	743.148	16	1015.64
16	264.906	16.1	425.099	16.1	563.324	16.2	744.69	16.1	1017.61
16.1	266.016	16.2	426.424	16.2	564.648	16.3	746.227	16.2	1019.55
16.2	267.111	16.3	427.741	16.3	565.962	16.4	747.764	16.3	1021.49
16.3	268.196	16.4	429.056	16.4	567.257	16.5	749.288	16.4	1023.41
16.4	269.275	16.5	430.367	16.5	568.549	16.6	750.802	16.5	1025.32
16.5	270.352	16.6	431.673	16.6	569.837	16.7	752.325	16.6	1027.23
16.6	271.422	16.7	432.97	16.7	571.122	16.8	753.828	16.7	1029.13
16.7	272.49	16.8	434.244	16.8	572.4	16.9	755.322	16.8	1031.02
16.8	273.551	16.9	435.508	16.9	573.664	17	756.815	16.9	1032.9
16.9	274.611	17	436.771	17	574.925	17.1	758.311	17	1034.79
17	275.655	17.1	438.034	17.1	576.185	17.2	759.79	17.1	1036.66
17.1	276.701	17.2	439.287	17.2	577.437	17.3	761.256	17.2	1038.52
17.2	277.755	17.3	440.539	17.3	578.679	17.4	762.725	17.3	1040.38
17.3	278.796	17.4	441.787	17.4	579.917	17.5	764.193	17.4	1042.23
17.4	279.833	17.5	443.012	17.5	581.156	17.6	765.659	17.5	1044.07
17.5	280.87	17.6	444.23	17.6	582.385	17.7	767.117	17.6	1045.9
17.6	281.893	17.7	445.445	17.7	583.602	17.8	768.559	17.7	1047.73
17.7	282.913	17.8	446.641	17.8	584.827	17.9	770.005	17.8	1049.54
17.8	283.93	17.9	447.837	17.9	586.047	18	771.443	17.9	1051.34
17.9	284.939	18	449.037	18	587.261	18.1	772.871	18	1053.14
18	285.938	18.1	450.227	18.1	588.472	18.2	774.297	18.1	1054.93
18.1	286.943	18.2	451.397	18.2	589.661	18.3	775.716	18.2	1056.72
18.2	287.936	18.3	452.553	18.3	590.833	18.4	777.137	18.3	1058.49
18.3	288.913	18.4	453.7	18.4	592.01	18.5	778.547	18.4	1060.28
18.4	289.895	18.5	454.843	18.5	593.184	18.6	779.946	18.5	1062.05
18.5	290.874	18.6	455.994	18.6	594.358	18.7	781.341	18.6	1063.81
18.6	291.849	18.7	457.13	18.7	595.533	18.8	782.736	18.7	1065.56
18.7	292.814	18.8	458.251	18.8	596.701	18.9	784.13	18.8	1067.31
18.8	293.772	18.9	459.377	18.9	597.852	19	785.52	18.9	1069.06
18.9	294.734	19	460.5	19	598.994	19.1	786.903	19	1070.81
19	295.694	19.1	461.606	19.1	600.135	19.2	788.272	19.1	1072.54
19.1	296.643	19.2	462.707	19.2	601.275	19.3	789.639	19.2	1074.26
19.2	297.602	19.3	463.802	19.3	602.415	19.4	791.001	19.3	1075.97
19.3	298.555	19.4	464.888	19.4	603.551	19.5	792.362	19.4	1077.66
19.4	299.482	19.5	465.975	19.5	604.682	19.6	793.717	19.5	1079.35
19.5	300.418	19.6	467.061	19.6	605.797	19.7	795.066	19.6	1081.04
19.6	301.355	19.7	468.139	19.7	606.905	19.8	796.405	19.7	1082.72
19.7	302.283	19.8	469.206	19.8	608.018	19.9	797.741	19.8	1084.41
19.8	303.215	19.9	470.265	19.9	609.122	20	799.069	19.9	1086.07
19.9	304.14	20	471.325	20	610.218	20.1	800.388	20	1087.72
20	305.058	20.1	472.379	20.1	611.316	20.2	801.715	20.1	1089.37
20.1	305.965	20.2	473.439	20.2	612.413	20.3	803.054	20.2	1091.02
20.2	306.875	20.3	474.495	20.3	613.515	20.4	804.378	20.3	1092.67
20.3	307.785	20.4	475.532	20.4	614.608	20.5	805.694	20.4	1094.31
20.4	308.681	20.5	476.571	20.5	615.701	20.6	807.016	20.5	1095.96
20.5	309.578	20.6	477.608	20.6	616.789	20.7	808.339	20.6	1097.59
20.6	310.46	20.7	478.63	20.7	617.878	20.8	809.657	20.7	1099.2
20.7	311.343	20.8	479.643	20.8	618.966	20.9	810.972	20.8	1100.82
20.8	312.223	20.9	480.661	20.9	620.035	21	812.284	20.9	1102.43
20.9	313.098	21	481.687	21	621.106	21.1	813.591	21	1104.03
21	313.98	21.1	482.687	21.1	622.184	21.2	814.898	21.1	1105.64
21.1	314.857	21.2	483.678	21.2	623.251	21.3	816.189	21.2	1107.24
21.2	315.74	21.3	484.655	21.3	624.309	21.4	817.464	21.3	1108.82
21.3	316.609	21.4	485.629	21.4	625.354	21.5	818.744	21.4	1110.4
21.4	317.466	21.5	486.605	21.5	626.39	21.6	820.021	21.5	1111.98
21.5	318.32	21.6	487.572	21.6	627.434	21.7	821.281	21.6	1113.54
21.6	319.182	21.7	488.525	21.7	628.483	21.8	822.542	21.7	1115.1
21.7	320.047	21.8	489.48	21.8	629.527	21.9	823.8	21.8	1116.65
21.8	320.899	21.9	490.432	21.9	630.57	22	825.052	21.9	1118.2
21.9	321.746	22	491.377	22	631.606	22.1	826.298	22	1119.74
22	322.585	22.1	492.323	22.1	632.64	22.2	827.539	22.1	1121.29
22.1	323.431	22.2	493.273	22.2	633.659	22.3	828.777	22.2	1122.81
22.2	324.27	22.3	494.22	22.3	634.683	22.4	830.017	22.3	1124.32
22.3	325.095	22.4	495.165	22.4	635.701	22.5	831.262	22.4	1125.83
22.4	325.922	22.5	496.095	22.5	636.718	22.6	832.498	22.5	1127.33
22.5	326.751	22.6	497.033	22.6	637.738	22.7	833.72	22.6	1128.82
22.6	327.574	22.7	497.973	22.7	638.733	22.8	834.937	22.7	1130.3
22.7	328.393	22.8	498.904	22.8	639.717	22.9	836.153	22.8	1131.78
22.8	329.2	22.9	499.82	22.9	640.706	23	837.373	22.9	1133.25
22.9	330.001	23	500.734	23	641.685	23.1	838.596	23	1134.72
23	330.808	23.1	501.643	23.1	642.664	23.2	839.814	23.1	1136.18
23.1	331.614	23.2	502.54	23.2	643.637	23.3	841.029	23.2	1137.63
23.2	332.407	23.3	503.438	23.3	644.609	23.4	842.233	23.3	1139.08
23.3	333.201	23.4	504.335	23.4	645.576	23.5	843.428	23.4	1140.52
23.4	334.001	23.5	505.225	23.5	646.544	23.6	844.615	23.5	1141.96
23.5	334.793	23.6	506.116	23.6	647.511	23.7	845.8	23.6	1143.41
23.6	335.576	23.7	506.984	23.7	648.473	23.8	846.985	23.7	1144.85
23.7	336.36	23.8	507.839	23.8	649.428	23.9	848.165	23.8	1146.28
23.8	337.143	23.9	508.694	23.9	650.381	24	849.344	23.9	1147.69
23.9	337.916	24	509.55	24	651.333	24.1	850.509	24	1149.1
24	338.688	24.1	510.412	24.1	652.284	24.2	851.672	24.1	1150.5
24.1	339.459	24.2	511.269	24.2	653.237	24.3	852.834	24.2	1151.89
24.2	340.238	24.3	512.117	24.3	654.18	24.4	854	24.3	1153.29
24.3	341.016	24.4	512.967	24.4	655.118	24.5	855.159	24.4	1154.69
24.4	341.795	24.5	513.801	24.5	656.054	24.6	856.318	24.5	1156.07
24.5	342.57	24.6	514.633	24.6	656.987	24.7	857.475	24.6	1157.46
24.6	343.351	24.7	515.462	24.7	657.918	24.8	858.634	24.7	1158.83
24.7	344.125	24.8	516.309	24.8	658.844	24.9	859.785	24.8	1160.18
24.8	344.887	24.9	517.156	24.9	659.773	25	860.928	24.9	1161.54
24.9	345.644	25	517.991	25	660.694	25.1	862.068	25	1162.9
25	346.403	25.1	518.816	25.1	661.603	25.2	863.203	25.1	1164.24
25.1	347.163	25.2	519.64	25.2	662.509	25.3	864.333	25.2	1165.59
25.2	347.922	25.3	520.457	25.3	663.407	25.4	865.452	25.3	1166.92
25.3	348.676	25.4	521.266	25.4	664.307	25.5	866.573	25.4	1168.25
25.4	349.433	25.5	522.078	25.5	665.208	25.6	867.698	25.5	1169.58
25.5	350.183	25.6	522.894	25.6	666.107	25.7	868.821	25.6	1170.9
25.6	350.927	25.7	523.705	25.7	667.005	25.8	869.935	25.7	1172.21
25.7	351.66	25.8	524.51	25.8	667.895	25.9	871.049	25.8	1173.51
25.8	352.395	25.9	525.307	25.9	668.786	26	872.166	25.9	1174.82
25.9	353.129	26	526.096	26	669.678	26.1	873.288	26	1176.12
26	353.856	26.1	526.882	26.1	670.569	26.2	874.407	26.1	1177.42
26.1	354.577	26.2	527.678	26.2	671.462	26.3	875.522	26.2	1178.73
26.2	355.307	26.3	528.463	26.3	672.35	26.4	876.636	26.3	1180.03
26.3	356.033	26.4	529.248	26.4	673.236	26.5	877.757	26.4	1181.32
26.4	356.755	26.5	530.047	26.5	674.125	26.6	878.864	26.5	1182.6
26.5	357.479	26.6	530.837	26.6	675.004	26.7	879.966	26.6	1183.88
26.6	358.193	26.7	531.619	26.7	675.877	26.8	881.07	26.7	1185.15
26.7	358.913	26.8	532.402	26.8	676.754	26.9	882.172	26.8	1186.44
26.8	359.639	26.9	533.188	26.9	677.625	27	883.27	26.9	1187.71
26.9	360.359	27	533.967	27	678.497	27.1	884.351	27	1188.98
27	361.089	27.1	534.743	27.1	679.364	27.2	885.419	27.1	1190.24
27.1	361.822	27.2	535.517	27.2	680.219	27.3	886.488	27.2	1191.49
27.2	362.541	27.3	536.288	27.3	681.068	27.4	887.563	27.3	1192.72
27.3	363.246	27.4	537.055	27.4	681.911	27.5	888.629	27.4	1193.96
27.4	363.959	27.5	537.816	27.5	682.749	27.6	889.69	27.5	1195.2
27.5	364.667	27.6	538.569	27.6	683.585	27.7	890.749	27.6	1196.44
27.6	365.361	27.7	539.315	27.7	684.422	27.8	891.813	27.7	1197.66
27.7	366.062	27.8	540.066	27.8	685.266	27.9	892.868	27.8	1198.88
27.8	366.761	27.9	540.804	27.9	686.11	28	893.924	27.9	1200.09
27.9	367.455	28	541.547	28	686.952	28.1	894.982	28	1201.3
28	368.142	28.1	542.29	28.1	687.789	28.2	896.044	28.1	1202.51
28.1	368.825	28.2	543.031	28.2	688.619	28.3	897.113	28.2	1203.7
28.2	369.513	28.3	543.768	28.3	689.459	28.4	898.177	28.3	1204.89
28.3	370.203	28.4	544.495	28.4	690.295	28.5	899.231	28.4	1206.1
28.4	370.894	28.5	545.218	28.5	691.131	28.6	900.283	28.5	1207.29
28.5	371.572	28.6	545.949	28.6	691.96	28.7	901.342	28.6	1208.46
28.6	372.251	28.7	546.68	28.7	692.783	28.8	902.39	28.7	1209.63
28.7	372.928	28.8	547.409	28.8	693.609	28.9	903.429	28.8	1210.81
28.8	373.61	28.9	548.133	28.9	694.422	29	904.479	28.9	1211.99
28.9	374.29	29	548.86	29	695.229	29.1	905.518	29	1213.15
29	374.965	29.1	549.583	29.1	696.034	29.2	906.547	29.1	1214.3
29.1	375.637	29.2	550.303	29.2	696.827	29.3	907.58	29.2	1215.44
29.2	376.311	29.3	551.012	29.3	697.624	29.4	908.603	29.3	1216.6
29.3	376.981	29.4	551.716	29.4	698.414	29.5	909.613	29.4	1217.75
29.4	377.64	29.5	552.422	29.5	699.191	29.6	910.624	29.5	1218.87
29.5	378.294	29.6	553.137	29.6	699.979	29.7	911.636	29.6	1220
29.6	378.956	29.7	553.841	29.7	700.771	29.8	912.638	29.7	1221.13
29.7	379.61	29.8	554.547	29.8	701.561	29.9	913.645	29.8	1222.26
29.8	380.267	29.9	555.245	29.9	702.338	30	914.639	29.9	1223.38
29.9	380.917	30	555.937	30	703.115	30.1	915.625	30	1224.5
30	381.565	30.1	556.627	30.1	703.896	30.2	916.622	30.1	1225.61
30.1	382.217	30.2	557.312	30.2	704.681	30.3	917.615	30.2	1226.73
30.2	382.869	30.3	557.997	30.3	705.471	30.4	918.612	30.3	1227.83
30.3	383.513	30.4	558.69	30.4	706.254	30.5	919.603	30.4	1228.93
30.4	384.158	30.5	559.376	30.5	707.026	30.6	920.593	30.5	1230.02
30.5	384.795	30.6	560.058	30.6	707.807	30.7	921.579	30.6	1231.11
30.6	385.426	30.7	560.735	30.7	708.589	30.8	922.565	30.7	1232.21
30.7	386.064	30.8	561.415	30.8	709.37	30.9	923.554	30.8	1233.3
30.8	386.706	30.9	562.085	30.9	710.144	31	924.533	30.9	1234.39
30.9	387.347	31	562.752	31	710.92	31.1	925.512	31	1235.47
31	387.979	31.1	563.423	31.1	711.699	31.2	926.486	31.1	1236.54
31.1	388.605	31.2	564.094	31.2	712.469	31.3	927.453	31.2	1237.61
31.2	389.235	31.3	564.766	31.3	713.243	31.4	928.417	31.3	1238.69
31.3	389.865	31.4	565.435	31.4	714.012	31.5	929.38	31.4	1239.77
31.4	390.491	31.5	566.096	31.5	714.773	31.6	930.335	31.5	1240.85
31.5	391.113	31.6	566.761	31.6	715.527	31.7	931.294	31.6	1241.91
31.6	391.736	31.7	567.43	31.7	716.278	31.8	932.26	31.7	1242.97
31.7	392.364	31.8	568.095	31.8	717.026	31.9	933.224	31.8	1244.02
31.8	392.994	31.9	568.747	31.9	717.78	32	934.185	31.9	1245.07
31.9	393.608	32	569.407	32	718.541	32.1	935.147	32	1246.11
32	394.21	32.1	570.064	32.1	719.284	32.2	936.109	32.1	1247.15
32.1	394.809	32.2	570.717	32.2	720.017	32.3	937.068	32.2	1248.19
32.2	395.424	32.3	571.372	32.3	720.744	32.4	938.019	32.3	1249.22
32.3	396.034	32.4	572.029	32.4	721.469	32.5	938.965	32.4	1250.25
32.4	396.637	32.5	572.676	32.5	722.192	32.6	939.903	32.5	1251.27
32.5	397.24	32.6	573.32	32.6	722.918	32.7	940.837	32.6	1252.27
32.6	397.836	32.7	573.962	32.7	723.649	32.8	941.765	32.7	1253.27
32.7	398.443	32.8	574.597	32.8	724.383	32.9	942.685	32.8	1254.27
32.8	399.044	32.9	575.226	32.9	725.116	33	943.611	32.9	1255.27
32.9	399.633	33	575.876	33	725.839	33.1	944.535	33	1256.25
33	400.228	33.1	576.534	33.1	726.55	33.2	945.456	33.1	1257.22
33.1	400.837	33.2	577.168	33.2	727.268	33.3	946.38	33.2	1258.2
33.2	401.442	33.3	577.799	33.3	727.986	33.4	947.296	33.3	1259.17
33.3	402.041	33.4	578.429	33.4	728.696	33.5	948.2	33.4	1260.15
33.4	402.628	33.5	579.053	33.5	729.406	33.6	949.104	33.5	1261.11
33.5	403.211	33.6	579.673	33.6	730.123	33.7	950.013	33.6	1262.07
33.6	403.796	33.7	580.295	33.7	730.841	33.8	950.926	33.7	1263.02
33.7	404.382	33.8	580.917	33.8	731.55	33.9	951.844	33.8	1263.98
33.8	404.966	33.9	581.535	33.9	732.258	34	952.756	33.9	1264.94
33.9	405.547	34	582.159	34	732.962	34.1	953.657	34	1265.88
34	406.139	34.1	582.77	34.1	733.654	34.2	954.544	34.1	1266.84
34.1	406.727	34.2	583.367	34.2	734.347	34.3	955.435	34.2	1267.79
34.2	407.304	34.3	583.966	34.3	735.048	34.4	956.317	34.3	1268.75
34.3	407.877	34.4	584.567	34.4	735.751	34.5	957.197	34.4	1269.68
34.4	408.443	34.5	585.173	34.5	736.464	34.6	958.085	34.5	1270.62
34.5	409.017	34.6	585.788	34.6	737.163	34.7	958.981	34.6	1271.54
34.6	409.595	34.7	586.395	34.7	737.848	34.8	959.865	34.7	1272.48
34.7	410.165	34.8	586.993	34.8	738.539	34.9	960.732	34.8	1273.41
34.8	410.73	34.9	587.597	34.9	739.229	35	961.593	34.9	1274.33
34.9	411.289	35	588.201	35	739.905	35.1	962.462	35	1275.24
35	411.839	35.1	588.803	35.1	740.583	35.2	963.328	35.1	1276.16
35.1	412.385	35.2	589.402	35.2	741.264	35.3	964.193	35.2	1277.07
35.2	412.932	35.3	589.994	35.3	741.947	35.4	965.06	35.3	1277.96
35.3	413.476	35.4	590.603	35.4	742.632	35.5	965.92	35.4	1278.86
35.4	414.026	35.5	591.209	35.5	743.31	35.6	966.785	35.5	1279.76
35.5	414.578	35.6	591.805	35.6	743.991	35.7	967.658	35.6	1280.66
35.6	415.131	35.7	592.397	35.7	744.671	35.8	968.514	35.7	1281.56
35.7	415.683	35.8	592.987	35.8	745.346	35.9	969.366	35.8	1282.45
35.8	416.24	35.9	593.584	35.9	746.017	36	970.225	35.9	1283.34
35.9	416.8	36	594.173	36	746.69	36.1	971.09	36	1284.23
36	417.347	36.1	594.763	36.1	747.372	36.2	971.941	36.1	1285.13
36.1	417.894	36.2	595.354	36.2	748.052	36.3	972.791	36.2	1286.02
36.2	418.439	36.3	595.937	36.3	748.725	36.4	973.639	36.3	1286.9
36.3	418.982	36.4	596.522	36.4	749.398	36.5	974.48	36.4	1287.77
36.4	419.532	36.5	597.109	36.5	750.064	36.6	975.314	36.5	1288.64
36.5	420.083	36.6	597.691	36.6	750.725	36.7	976.145	36.6	1289.49
36.6	420.615	36.7	598.266	36.7	751.387	36.8	976.976	36.7	1290.35
36.7	421.145	36.8	598.846	36.8	752.047	36.9	977.807	36.8	1291.2
36.8	421.683	36.9	599.438	36.9	752.707	37	978.645	36.9	1292.06
36.9	422.22	37	600.013	37	753.37	37.1	979.485	37	1292.92
37	422.747	37.1	600.591	37.1	754.029	37.2	980.319	37.1	1293.77
37.1	423.275	37.2	601.175	37.2	754.691	37.3	981.155	37.2	1294.62
37.2	423.824	37.3	601.754	37.3	755.36	37.4	981.986	37.3	1295.46
37.3	424.364	37.4	602.327	37.4	756.024	37.5	982.824	37.4	1296.3
37.4	424.896	37.5	602.903	37.5	756.682	37.6	983.657	37.5	1297.15
37.5	425.428	37.6	603.465	37.6	757.337	37.7	984.489	37.6	1297.99
37.6	425.952	37.7	604.021	37.7	757.984	37.8	985.321	37.7	1298.83
37.7	426.484	37.8	604.596	37.8	758.644	37.9	986.135	37.8	1299.67
37.8	427.018	37.9	605.149	37.9	759.308	38	986.957	37.9	1300.5
37.9	427.536	38	605.693	38	759.963	38.1	987.765	38	1301.33
38	428.058	38.1	606.244	38.1	760.611	38.2	988.568	38.1	1302.15
38.1	428.577	38.2	606.795	38.2	761.264	38.3	989.375	38.2	1302.97
38.2	429.102	38.3	607.34	38.3	761.922	38.4	990.18	38.3	1303.78
38.3	429.618	38.4	607.886	38.4	762.568	38.5	990.974	38.4	1304.59
38.4	430.134	38.5	608.43	38.5	763.21	38.6	991.77	38.5	1305.4
38.5	430.645	38.6	608.973	38.6	763.851	38.7	992.565	38.6	1306.21
38.6	431.161	38.7	609.519	38.7	764.493	38.8	993.356	38.7	1307.02
38.7	431.686	38.8	610.073	38.8	765.142	38.9	994.156	38.8	1307.83
38.8	432.202	38.9	610.618	38.9	765.78	39	994.954	38.9	1308.63
38.9	432.719	39	611.17	39	766.413	39.1	995.745	39	1309.43
39	433.234	39.1	611.719	39.1	767.046	39.2	996.541	39.1	1310.22
39.1	433.743	39.2	612.254	39.2	767.681	39.3	997.341	39.2	1311.02
39.2	434.25	39.3	612.792	39.3	768.317	39.4	998.137	39.3	1311.8
39.3	434.759	39.4	613.327	39.4	768.945	39.5	998.931	39.4	1312.6
39.4	435.265	39.5	613.873	39.5	769.578	39.6	999.723	39.5	1313.41
39.5	435.767	39.6	614.41	39.6	770.202	39.7	1000.5	39.6	1314.19
39.6	436.26	39.7	614.949	39.7	770.836	39.8	1001.28	39.7	1314.98
39.7	436.743	39.8	615.494	39.8	771.472	39.9	1002.07	39.8	1315.77
39.8	437.227	39.9	616.036	39.9	772.091	40	1002.85	39.9	1316.55
39.9	437.731	40	616.562	40	772.71	40.1	1003.62	40	1317.34
40	438.242	40.1	617.087	40.1	773.323	40.2	1004.39	40.1	1318.11
40.1	438.727	40.2	617.614	40.2	773.942	40.3	1005.16	40.2	1318.87
40.2	439.22	40.3	618.15	40.3	774.568	40.4	1005.92	40.3	1319.64
40.3	439.708	40.4	618.683	40.4	775.18	40.5	1006.68	40.4	1320.4
40.4	440.189	40.5	619.219	40.5	775.788	40.6	1007.44	40.5	1321.16
40.5	440.686	40.6	619.742	40.6	776.395	40.7	1008.19	40.6	1321.91
40.6	441.184	40.7	620.257	40.7	777.008	40.8	1008.95	40.7	1322.67
40.7	441.68	40.8	620.781	40.8	777.62	40.9	1009.7	40.8	1323.41
40.8	442.174	40.9	621.298	40.9	778.23	41	1010.45	40.9	1324.16
40.9	442.671	41	621.807	41	778.843	41.1	1011.2	41	1324.89
41	443.16	41.1	622.328	41.1	779.455	41.2	1011.95	41.1	1325.63
41.1	443.638	41.2	622.843	41.2	780.068	41.3	1012.7	41.2	1326.36
41.2	444.129	41.3	623.361	41.3	780.684	41.4	1013.45	41.3	1327.11
41.3	444.616	41.4	623.881	41.4	781.301	41.5	1014.2	41.4	1327.86
41.4	445.113	41.5	624.386	41.5	781.911	41.6	1014.95	41.5	1328.6
41.5	445.602	41.6	624.896	41.6	782.533	41.7	1015.69	41.6	1329.34
41.6	446.083	41.7	625.402	41.7	783.153	41.8	1016.44	41.7	1330.08
41.7	446.557	41.8	625.912	41.8	783.768	41.9	1017.18	41.8	1330.81
41.8	447.035	41.9	626.432	41.9	784.381	42	1017.92	41.9	1331.53
41.9	447.521	42	626.942	42	784.99	42.1	1018.65	42	1332.26
42	447.996	42.1	627.453	42.1	785.601	42.2	1019.39	42.1	1332.98
42.1	448.455	42.2	627.963	42.2	786.205	42.3	1020.13	42.2	1333.7
42.2	448.923	42.3	628.481	42.3	786.806	42.4	1020.86	42.3	1334.43
42.3	449.404	42.4	628.989	42.4	787.413	42.5	1021.58	42.4	1335.14
42.4	449.876	42.5	629.494	42.5	788.012	42.6	1022.3	42.5	1335.85
42.5	450.341	42.6	630.009	42.6	788.61	42.7	1023.02	42.6	1336.56
42.6	450.805	42.7	630.528	42.7	789.221	42.8	1023.74	42.7	1337.27
42.7	451.27	42.8	631.046	42.8	789.814	42.9	1024.45	42.8	1337.97
42.8	451.731	42.9	631.552	42.9	790.4	43	1025.16	42.9	1338.67
42.9	452.188	43	632.053	43	790.992	43.1	1025.88	43	1339.37
43	452.646	43.1	632.561	43.1	791.587	43.2	1026.59	43.1	1340.07
43.1	453.111	43.2	633.065	43.2	792.176	43.3	1027.29	43.2	1340.76
43.2	453.579	43.3	633.563	43.3	792.763	43.4	1028	43.3	1341.45
43.3	454.041	43.4	634.056	43.4	793.345	43.5	1028.71	43.4	1342.13
43.4	454.495	43.5	634.553	43.5	793.927	43.6	1029.42	43.5	1342.82
43.5	454.956	43.6	635.053	43.6	794.51	43.7	1030.13	43.6	1343.51
43.6	455.425	43.7	635.543	43.7	795.09	43.8	1030.84	43.7	1344.19
43.7	455.889	43.8	636.039	43.8	795.668	43.9	1031.54	43.8	1344.87
43.8	456.352	43.9	636.531	43.9	796.247	44	1032.25	43.9	1345.55
43.9	456.812	44	637.026	44	796.825	44.1	1032.95	44	1346.23
44	457.27	44.1	637.515	44.1	797.403	44.2	1033.64	44.1	1346.9
44.1	457.725	44.2	638.01	44.2	797.98	44.3	1034.34	44.2	1347.58
44.2	458.179	44.3	638.499	44.3	798.546	44.4	1035.04	44.3	1348.26
44.3	458.634	44.4	638.991	44.4	799.113	44.5	1035.73	44.4	1348.93
44.4	459.089	44.5	639.485	44.5	799.696	44.6	1036.44	44.5	1349.6
44.5	459.536	44.6	639.98	44.6	800.275	44.7	1037.14	44.6	1350.27
44.6	459.987	44.7	640.469	44.7	800.848	44.8	1037.82	44.7	1350.92
44.7	460.426	44.8	640.95	44.8	801.416	44.9	1038.51	44.8	1351.58
44.8	460.861	44.9	641.432	44.9	801.985	45	1039.2	44.9	1352.24
44.9	461.311	45	641.914	45	802.563	45.1	1039.89	45	1352.9
45	461.761	45.1	642.397	45.1	803.145	45.2	1040.57	45.1	1353.56
45.1	462.208	45.2	642.883	45.2	803.707	45.3	1041.26	45.2	1354.21
45.2	462.646	45.3	643.361	45.3	804.269	45.4	1041.94	45.3	1354.85
45.3	463.091	45.4	643.838	45.4	804.847	45.5	1042.62	45.4	1355.5
45.4	463.537	45.5	644.321	45.5	805.428	45.6	1043.29	45.5	1356.14
45.5	463.973	45.6	644.795	45.6	805.996	45.7	1043.95	45.6	1356.79
45.6	464.409	45.7	645.27	45.7	806.567	45.8	1044.61	45.7	1357.43
45.7	464.851	45.8	645.74	45.8	807.128	45.9	1045.27	45.8	1358.07
45.8	465.291	45.9	646.219	45.9	807.683	46	1045.93	45.9	1358.71
45.9	465.727	46	646.694	46	808.25	46.1	1046.58	46	1359.35
46	466.151	46.1	647.168	46.1	808.81	46.2	1047.24	46.1	1359.98
46.1	466.574	46.2	647.639	46.2	809.366	46.3	1047.9	46.2	1360.61
46.2	467.013	46.3	648.112	46.3	809.924	46.4	1048.55	46.3	1361.23
46.3	467.451	46.4	648.591	46.4	810.487	46.5	1049.21	46.4	1361.86
46.4	467.876	46.5	649.053	46.5	811.047	46.6	1049.86	46.5	1362.49
46.5	468.292	46.6	649.513	46.6	811.601	46.7	1050.52	46.6	1363.11
46.6	468.721	46.7	649.99	46.7	812.152	46.8	1051.18	46.7	1363.74
46.7	469.159	46.8	650.464	46.8	812.704	46.9	1051.83	46.8	1364.36
46.8	469.587	46.9	650.934	46.9	813.263	47	1052.49	46.9	1364.99
46.9	470.014	47	651.4	47	813.827	47.1	1053.15	47	1365.61
47	470.444	47.1	651.877	47.1	814.387	47.2	1053.8	47.1	1366.24
47.1	470.876	47.2	652.351	47.2	814.943	47.3	1054.45	47.2	1366.87
47.2	471.31	47.3	652.823	47.3	815.495	47.4	1055.1	47.3	1367.49
47.3	471.735	47.4	653.284	47.4	816.043	47.5	1055.74	47.4	1368.11
47.4	472.156	47.5	653.744	47.5	816.599	47.6	1056.39	47.5	1368.72
47.5	472.579	47.6	654.228	47.6	817.155	47.7	1057.04	47.6	1369.33
47.6	473.007	47.7	654.708	47.7	817.703	47.8	1057.7	47.7	1369.95
47.7	473.434	47.8	655.172	47.8	818.26	47.9	1058.35	47.8	1370.56
47.8	473.862	47.9	655.633	47.9	818.814	48	1058.99	47.9	1371.17
47.9	474.285	48	656.097	48	819.365	48.1	1059.62	48	1371.78
48	474.712	48.1	656.559	48.1	819.92	48.2	1060.26	48.1	1372.38
48.1	475.133	48.2	657.02	48.2	820.469	48.3	1060.91	48.2	1372.98
48.2	475.564	48.3	657.485	48.3	821.016	48.4	1061.56	48.3	1373.56
48.3	475.986	48.4	657.944	48.4	821.572	48.5	1062.19	48.4	1374.16
48.4	476.404	48.5	658.398	48.5	822.124	48.6	1062.82	48.5	1374.76
48.5	476.821	48.6	658.845	48.6	822.666	48.7	1063.46	48.6	1375.35
48.6	477.238	48.7	659.295	48.7	823.206	48.8	1064.09	48.7	1375.94
48.7	477.656	48.8	659.738	48.8	823.748	48.9	1064.72	48.8	1376.53
48.8	478.069	48.9	660.171	48.9	824.288	49	1065.34	48.9	1377.11
48.9	478.481	49	660.606	49	824.826	49.1	1065.97	49	1377.69
49	478.892	49.1	661.049	49.1	825.368	49.2	1066.61	49.1	1378.27
49.1	479.304	49.2	661.498	49.2	825.906	49.3	1067.23	49.2	1378.85
49.2	479.718	49.3	661.944	49.3	826.452	49.4	1067.85	49.3	1379.44
49.3	480.133	49.4	662.387	49.4	826.992	49.5	1068.47	49.4	1380.02
49.4	480.539	49.5	662.825	49.5	827.518	49.6	1069.07	49.5	1380.59
49.5	480.946	49.6	663.261	49.6	828.042	49.7	1069.68	49.6	1381.15
49.6	481.355	49.7	663.702	49.7	828.577	49.8	1070.29	49.7	1381.72
49.7	481.754	49.8	664.146	49.8	829.119	49.9	1070.89	49.8	1382.29
49.8	482.153	49.9	664.588	49.9	829.654	50	1071.49	49.9	1382.86
49.9	482.56	50	665.031	50	830.19	50.1	1072.1	50	1383.42
50	482.959	50.1	665.482	50.1	830.726	50.2	1072.7	50.1	1384
50.1	483.364	50.2	665.926	50.2	831.26	50.3	1073.29	50.2	1384.57
50.2	483.765	50.3	666.364	50.3	831.791	50.4	1073.89	50.3	1385.13
50.3	484.153	50.4	666.799	50.4	832.324	50.5	1074.48	50.4	1385.7
50.4	484.539	50.5	667.229	50.5	832.853	50.6	1075.08	50.5	1386.26
50.5	484.932	50.6	667.667	50.6	833.388	50.7	1075.68	50.6	1386.82
50.6	485.326	50.7	668.115	50.7	833.929	50.8	1076.27	50.7	1387.39
50.7	485.723	50.8	668.552	50.8	834.457	50.9	1076.87	50.8	1387.96
50.8	486.117	50.9	668.981	50.9	834.975	51	1077.47	50.9	1388.52
50.9	486.514	51	669.423	51	835.499	51.1	1078.07	51	1389.09
51	486.91	51.1	669.868	51.1	836.024	51.2	1078.66	51.1	1389.65
51.1	487.299	51.2	670.309	51.2	836.55	51.3	1079.26	51.2	1390.21
51.2	487.7	51.3	670.738	51.3	837.072	51.4	1079.86	51.3	1390.76
51.3	488.105	51.4	671.176	51.4	837.586	51.5	1080.44	51.4	1391.32
51.4	488.521	51.5	671.617	51.5	838.097	51.6	1081.04	51.5	1391.87
51.5	488.93	51.6	672.056	51.6	838.612	51.7	1081.63	51.6	1392.42
51.6	489.327	51.7	672.493	51.7	839.132	51.8	1082.23	51.7	1392.96
51.7	489.72	51.8	672.918	51.8	839.644	51.9	1082.81	51.8	1393.49
51.8	490.104	51.9	673.349	51.9	840.161	52	1083.4	51.9	1394.03
51.9	490.494	52	673.779	52	840.681	52.1	1083.99	52	1394.57
52	490.887	52.1	674.192	52.1	841.208	52.2	1084.57	52.1	1395.11
52.1	491.279	52.2	674.618	52.2	841.732	52.3	1085.16	52.2	1395.65
52.2	491.675	52.3	675.048	52.3	842.249	52.4	1085.73	52.3	1396.19
52.3	492.068	52.4	675.488	52.4	842.763	52.5	1086.31	52.4	1396.74
52.4	492.452	52.5	675.923	52.5	843.284	52.6	1086.89	52.5	1397.28
52.5	492.832	52.6	676.351	52.6	843.807	52.7	1087.47	52.6	1397.82
52.6	493.215	52.7	676.777	52.7	844.328	52.8	1088.03	52.7	1398.35
52.7	493.596	52.8	677.2	52.8	844.848	52.9	1088.59	52.8	1398.89
52.8	493.983	52.9	677.634	52.9	845.366	53	1089.16	52.9	1399.42
52.9	494.376	53	678.063	53	845.875	53.1	1089.73	53	1399.95
53	494.768	53.1	678.494	53.1	846.383	53.2	1090.3	53.1	1400.47
53.1	495.157	53.2	678.923	53.2	846.885	53.3	1090.87	53.2	1400.99
53.2	495.547	53.3	679.339	53.3	847.379	53.4	1091.45	53.3	1401.51
53.3	495.931	53.4	679.752	53.4	847.882	53.5	1092.02	53.4	1402.03
53.4	496.303	53.5	680.168	53.5	848.393	53.6	1092.58	53.5	1402.55
53.5	496.687	53.6	680.578	53.6	848.893	53.7	1093.15	53.6	1403.06
53.6	497.065	53.7	680.992	53.7	849.397	53.8	1093.71	53.7	1403.57
53.7	497.445	53.8	681.406	53.8	849.893	53.9	1094.28	53.8	1404.08
53.8	497.821	53.9	681.823	53.9	850.39	54	1094.85	53.9	1404.6
53.9	498.188	54	682.236	54	850.899	54.1	1095.41	54	1405.12
54	498.559	54.1	682.65	54.1	851.408	54.2	1095.95	54.1	1405.63
54.1	498.933	54.2	683.061	54.2	851.909	54.3	1096.51	54.2	1406.14
54.2	499.297	54.3	683.485	54.3	852.411	54.4	1097.06	54.3	1406.65
54.3	499.653	54.4	683.9	54.4	852.917	54.5	1097.61	54.4	1407.15
54.4	500.019	54.5	684.312	54.5	853.418	54.6	1098.16	54.5	1407.65
54.5	500.396	54.6	684.73	54.6	853.912	54.7	1098.72	54.6	1408.14
54.6	500.767	54.7	685.148	54.7	854.413	54.8	1099.27	54.7	1408.65
54.7	501.142	54.8	685.563	54.8	854.914	54.9	1099.81	54.8	1409.16
54.8	501.508	54.9	685.97	54.9	855.417	55	1100.35	54.9	1409.67
54.9	501.87	55	686.376	55	855.908	55.1	1100.9	55	1410.18
55	502.229	55.1	686.781	55.1	856.395	55.2	1101.45	55.1	1410.69
55.1	502.593	55.2	687.187	55.2	856.888	55.3	1101.98	55.2	1411.21
55.2	502.957	55.3	687.587	55.3	857.377	55.4	1102.52	55.3	1411.71
55.3	503.312	55.4	687.984	55.4	857.868	55.5	1103.05	55.4	1412.22
55.4	503.677	55.5	688.39	55.5	858.355	55.6	1103.6	55.5	1412.73
55.5	504.039	55.6	688.796	55.6	858.846	55.7	1104.13	55.6	1413.24
55.6	504.394	55.7	689.21	55.7	859.346	55.8	1104.66	55.7	1413.74
55.7	504.755	55.8	689.617	55.8	859.83	55.9	1105.18	55.8	1414.23
55.8	505.118	55.9	690.04	55.9	860.312	56	1105.71	55.9	1414.73
55.9	505.49	56	690.464	56	860.795	56.1	1106.23	56	1415.22
56	505.859	56.1	690.883	56.1	861.281	56.2	1106.76	56.1	1415.71
56.1	506.23	56.2	691.298	56.2	861.768	56.3	1107.29	56.2	1416.19
56.2	506.596	56.3	691.703	56.3	862.246	56.4	1107.82	56.3	1416.66
56.3	506.955	56.4	692.105	56.4	862.712	56.5	1108.35	56.4	1417.14
56.4	507.316	56.5	692.515	56.5	863.188	56.6	1108.88	56.5	1417.61
56.5	507.681	56.6	692.924	56.6	863.667	56.7	1109.41	56.6	1418.09
56.6	508.048	56.7	693.341	56.7	864.143	56.8	1109.95	56.7	1418.57
56.7	508.418	56.8	693.743	56.8	864.621	56.9	1110.5	56.8	1419.04
56.8	508.785	56.9	694.146	56.9	865.107	57	1111.03	56.9	1419.53
56.9	509.149	57	694.538	57	865.585	57.1	1111.56	57	1420
57	509.507	57.1	694.937	57.1	866.069	57.2	1112.08	57.1	1420.47
57.1	509.86	57.2	695.326	57.2	866.553	57.3	1112.6	57.2	1420.94
57.2	510.204	57.3	695.727	57.3	867.029	57.4	1113.11	57.3	1421.39
57.3	510.558	57.4	696.139	57.4	867.511	57.5	1113.63	57.4	1421.85
57.4	510.915	57.5	696.551	57.5	868.006	57.6	1114.15	57.5	1422.32
57.5	511.269	57.6	696.965	57.6	868.491	57.7	1114.66	57.6	1422.79
57.6	511.616	57.7	697.37	57.7	868.973	57.8	1115.18	57.7	1423.28
57.7	511.969	57.8	697.771	57.8	869.452	57.9	1115.69	57.8	1423.75
57.8	512.32	57.9	698.169	57.9	869.926	58	1116.21	57.9	1424.23
57.9	512.67	58	698.567	58	870.407	58.1	1116.73	58	1424.71
58	513.024	58.1	698.969	58.1	870.889	58.2	1117.25	58.1	1425.19
58.1	513.373	58.2	699.361	58.2	871.356	58.3	1117.77	58.2	1425.66
58.2	513.718	58.3	699.755	58.3	871.827	58.4	1118.27	58.3	1426.13
58.3	514.075	58.4	700.15	58.4	872.293	58.5	1118.78	58.4	1426.63
58.4	514.43	58.5	700.548	58.5	872.765	58.6	1119.28	58.5	1427.11
58.5	514.778	58.6	700.933	58.6	873.23	58.7	1119.78	58.6	1427.58
58.6	515.125	58.7	701.312	58.7	873.704	58.8	1120.27	58.7	1428.04
58.7	515.472	58.8	701.701	58.8	874.172	58.9	1120.76	58.8	1428.49
58.8	515.816	58.9	702.093	58.9	874.626	59	1121.26	58.9	1428.95
58.9	516.159	59	702.499	59	875.109	59.1	1121.27	59	1429.41
59	516.523	59.1	702.514	59.1	875.124	59.2	1121.26	59.1	1429.41
59.1	516.537	59.2	702.499	59.2	875.109	59.3	1121.26	59.2	1429.03
59.2	516.523	59.3	702.499	59.3	875.109	59.4	1121.27	59.3	1429.03
59.3	516.523	59.4	702.514	59.4	875.124	59.5	1121.51	59.4	1429.03
59.4	516.537	59.5	702.499	59.5	875.438	59.6	1121.51	59.5	1428.96
59.5	516.523	59.6	702.34	59.6	875.604	59.7	1121.37	59.6	1428.95
59.6	516.348	59.7	702.291	59.7	875.615	59.8	1121.27	59.7	1428.5
59.7	516.233	59.8	702.197	59.8	875.604	59.9	1121.26	59.8	1428.49
59.8	516.217	59.9	702.166	59.9	875.438	60	1121.06	59.9	1428.19
59.9	516.176	60	702.166	60	875.438	60.1	1121.06	60	1428.04
60	516.176	60.1	702.166	60.1	875.438	60.2	1121.06	60.1	1428.04
60.1	516.176	60.2	702.166	60.2	875.438	60.3	1121.06	60.2	1428.04
60.2	516.176	60.3	702.166	60.3	875.438	60.4	1121.06	60.3	1427.27
60.3	516.176	60.4	702.166	60.4	875.438	60.5	1121.06	60.4	1424.87
60.4	516.176	60.5	702.166	60.5	875.438	60.6	1120.77	60.5	1424.75
60.5	516.176	60.6	702.109	60.6	875.438	60.7	1120.51	60.6	1424.59
60.6	516.118	60.7	701.905	60.7	875.216	60.8	1120.36	60.7	1424.55
60.7	516.1	60.8	701.812	60.8	875.124	60.9	1120.3	60.8	1424.15
60.8	516.033	60.9	701.713	60.9	875.025	61	1120.28	60.9	1423.85
60.9	516.013	61	701.713	61	874.859	61.1	1120.15	61	1423.67
61	515.88	61.1	701.506	61.1	874.69	61.2	1119.92	61.1	1423.15
61.1	515.828	61.2	701.455	61.2	874.69	61.3	1119.75	61.2	1422.34
61.2	515.824	61.3	701.405	61.3	874.859	61.4	1119.75	61.3	1421.49
61.3	515.824	61.4	701.388	61.4	874.69	61.5	1117.74	61.4	1420.79
61.4	515.748	61.5	701.294	61.5	874.357	61.6	1115.83	61.5	1418.34
61.5	515.625	61.6	700.288	61.6	872.127	61.7	1113.81	61.6	1415.99
61.6	515.518	61.7	699.104	61.7	870.595	61.8	1112.15	61.7	1413.7
61.7	515.031	61.8	697.759	61.8	869.27	61.9	1110.11	61.8	1411.78
61.8	514.241	61.9	696.213	61.9	867.489	62	1108.37	61.9	1409.6
61.9	513.213	62	694.686	62	865.582	62.1	1106.48	62	1407.45
62	512.301	62.1	693.272	62.1	863.942	62.2	1104.75	62.1	1405.16
62.1	511.253	62.2	691.915	62.2	862.286	62.3	1102.97	62.2	1403.08
62.2	510.231	62.3	690.541	62.3	860.909	62.4	1101.32	62.3	1401.27
62.3	509.197	62.4	689.172	62.4	859.332	62.5	1099.68	62.4	1399.13
62.4	508.19	62.5	687.829	62.5	857.773	62.6	1098.07	62.5	1397.21
62.5	507.218	62.6	686.494	62.6	856.325	62.7	1096.48	62.6	1395.37
62.6	506.272	62.7	685.155	62.7	854.998	62.8	1095.03	62.7	1393.47
62.7	505.359	62.8	683.833	62.8	853.6	62.9	1093.45	62.8	1391.48
62.8	504.371	62.9	682.51	62.9	852.223	63	1092.03	62.9	1389.49
62.9	503.414	63	681.224	63	850.864	63.1	1090.74	63	1387.69
63	502.571	63.1	680.004	63.1	849.484	63.2	1089.24	63.1	1385.97
63.1	501.623	63.2	678.782	63.2	848.145	63.3	1087.88	63.2	1384.16
63.2	500.657	63.3	677.529	63.3	846.83	63.4	1086.56	63.3	1382.41
63.3	499.787	63.4	676.309	63.4	845.552	63.5	1085.19	63.4	1380.6
63.4	498.87	63.5	675.138	63.5	844.32	63.6	1083.83	63.5	1378.79
63.5	497.975	63.6	673.93	63.6	843.082	63.7	1082.52	63.6	1377.02
63.6	497.035	63.7	672.781	63.7	841.911	63.8	1081.28	63.7	1375.32
63.7	496.184	63.8	671.583	63.8	840.774	63.9	1080.04	63.8	1373.65
63.8	495.289	63.9	670.414	63.9	839.558	64	1078.86	63.9	1372
63.9	494.41	64	669.267	64	838.435	64.1	1077.58	64	1370.38
64	493.552	64.1	668.142	64.1	837.275	64.2	1076.39	64.1	1368.78
64.1	492.678	64.2	667.014	64.2	836.201	64.3	1075.18	64.2	1367.15
64.2	491.834	64.3	665.913	64.3	835.128	64.4	1074.1	64.3	1365.59
64.3	491	64.4	664.817	64.4	834.091	64.5	1072.97	64.4	1364.01
64.4	490.162	64.5	663.739	64.5	833.069	64.6	1071.84	64.5	1362.47
64.5	489.333	64.6	662.658	64.6	832.013	64.7	1070.69	64.6	1360.91
64.6	488.499	64.7	661.588	64.7	830.979	64.8	1069.67	64.7	1359.35
64.7	487.678	64.8	660.531	64.8	829.969	64.9	1068.62	64.8	1357.88
64.8	486.873	64.9	659.497	64.9	828.971	65	1067.62	64.9	1356.41
64.9	486.079	65	658.461	65	828.005	65.1	1066.61	65	1354.97
65	485.286	65.1	657.42	65.1	827.036	65.2	1065.63	65.1	1353.53
65.1	484.488	65.2	656.395	65.2	826.079	65.3	1064.64	65.2	1352.1
65.2	483.697	65.3	655.398	65.3	825.146	65.4	1063.66	65.3	1350.68
65.3	482.922	65.4	654.413	65.4	824.244	65.5	1062.7	65.4	1349.28
65.4	482.167	65.5	653.435	65.5	823.36	65.6	1061.76	65.5	1347.92
65.5	481.414	65.6	652.469	65.6	822.473	65.7	1060.83	65.6	1346.56
65.6	480.665	65.7	651.518	65.7	821.601	65.8	1059.92	65.7	1345.21
65.7	479.92	65.8	650.575	65.8	820.745	65.9	1059.02	65.8	1343.89
65.8	479.18	65.9	649.646	65.9	819.901	66	1058.14	65.9	1342.58
65.9	478.455	66	648.719	66	819.077	66.1	1057.27	66	1341.27
66	477.722	66.1	647.804	66.1	818.254	66.2	1056.41	66.1	1340
66.1	476.992	66.2	646.908	66.2	817.446	66.3	1055.57	66.2	1338.74
66.2	476.279	66.3	646.021	66.3	816.658	66.4	1054.76	66.3	1337.49
66.3	475.584	66.4	645.129	66.4	815.873	66.5	1053.96	66.4	1336.27
66.4	474.886	66.5	644.253	66.5	815.089	66.6	1053.18	66.5	1335.05
66.5	474.199	66.6	643.384	66.6	814.32	66.7	1052.41	66.6	1333.84
66.6	473.522	66.7	642.527	66.7	813.564	66.8	1051.65	66.7	1332.65
66.7	472.834	66.8	641.696	66.8	812.823	66.9	1050.9	66.8	1331.48
66.8	472.16	66.9	640.875	66.9	812.087	67	1050.15	66.9	1330.32
66.9	471.503	67	640.046	67	811.361	67.1	1049.41	67	1329.16
67	470.835	67.1	639.229	67.1	810.658	67.2	1048.68	67.1	1328.03
67.1	470.18	67.2	638.414	67.2	809.96	67.3	1047.96	67.2	1326.9
67.2	469.528	67.3	637.59	67.3	809.251	67.4	1047.25	67.3	1325.79
67.3	468.863	67.4	636.774	67.4	808.546	67.5	1046.55	67.4	1324.69
67.4	468.205	67.5	635.982	67.5	807.864	67.6	1045.83	67.5	1323.6
67.5	467.557	67.6	635.175	67.6	807.18	67.7	1045.13	67.6	1322.51
67.6	466.905	67.7	634.382	67.7	806.499	67.8	1044.44	67.7	1321.43
67.7	466.246	67.8	633.613	67.8	805.84	67.9	1043.76	67.8	1320.36
67.8	465.613	67.9	632.843	67.9	805.173	68	1043.1	67.9	1319.3
67.9	464.982	68	632.091	68	804.537	68.1	1042.46	68	1318.27
68	464.355	68.1	631.337	68.1	803.909	68.2	1041.82	68.1	1317.25
68.1	463.738	68.2	630.586	68.2	803.279	68.3	1041.19	68.2	1316.23
68.2	463.126	68.3	629.85	68.3	802.656	68.4	1040.56	68.3	1315.23
68.3	462.513	68.4	629.128	68.4	802.045	68.5	1039.94	68.4	1314.24
68.4	461.921	68.5	628.417	68.5	801.441	68.6	1039.34	68.5	1313.25
68.5	461.335	68.6	627.715	68.6	800.853	68.7	1038.73	68.6	1312.28
68.6	460.751	68.7	627.004	68.7	800.265	68.8	1038.14	68.7	1311.32
68.7	460.165	68.8	626.297	68.8	799.687	68.9	1037.56	68.8	1310.38
68.8	459.584	68.9	625.6	68.9	799.114	69	1036.96	68.9	1309.45
68.9	459.015	69	624.886	69	798.537	69.1	1036.37	69	1308.51
69	458.424	69.1	624.171	69.1	797.967	69.2	1035.79	69.1	1307.57
69.1	457.844	69.2	623.48	69.2	797.402	69.3	1035.22	69.2	1306.65
69.2	457.285	69.3	622.794	69.3	796.829	69.4	1034.65	69.3	1305.74
69.3	456.712	69.4	622.115	69.4	796.269	69.5	1034.08	69.4	1304.83
69.4	456.148	69.5	621.433	69.5	795.727	69.6	1033.53	69.5	1303.92
69.5	455.572	69.6	620.754	69.6	795.185	69.7	1032.97	69.6	1303.03
69.6	455.004	69.7	620.083	69.7	794.652	69.8	1032.42	69.7	1302.16
69.7	454.459	69.8	619.416	69.8	794.119	69.9	1031.9	69.8	1301.3
69.8	453.91	69.9	618.76	69.9	793.597	70	1031.38	69.9	1300.44
69.9	453.37	70	618.106	70	793.073	70.1	1030.86	70	1299.58
70	452.829	70.1	617.459	70.1	792.561	70.2	1030.35	70.1	1298.73
70.1	452.291	70.2	616.822	70.2	792.061	70.3	1029.84	70.2	1297.89
70.2	451.767	70.3	616.196	70.3	791.552	70.4	1029.34	70.3	1297.06
70.3	451.243	70.4	615.576	70.4	791.054	70.5	1028.83	70.4	1296.24
70.4	450.728	70.5	614.945	70.5	790.56	70.6	1028.33	70.5	1295.43
70.5	450.215	70.6	614.327	70.6	790.062	70.7	1027.83	70.6	1294.62
70.6	449.695	70.7	613.719	70.7	789.577	70.8	1027.34	70.7	1293.81
70.7	449.184	70.8	613.115	70.8	789.093	70.9	1026.86	70.8	1293.01
70.8	448.666	70.9	612.526	70.9	788.608	71	1026.37	70.9	1292.21
70.9	448.159	71	611.941	71	788.122	71.1	1025.88	71	1291.42
71	447.657	71.1	611.347	71.1	787.633	71.2	1025.4	71.1	1290.63
71.1	447.152	71.2	610.758	71.2	787.148	71.3	1024.92	71.2	1289.86
71.2	446.661	71.3	610.175	71.3	786.676	71.4	1024.45	71.3	1289.11
71.3	446.172	71.4	609.595	71.4	786.216	71.5	1023.98	71.4	1288.34
71.4	445.673	71.5	609.012	71.5	785.76	71.6	1023.52	71.5	1287.58
71.5	445.18	71.6	608.433	71.6	785.313	71.7	1023.08	71.6	1286.83
71.6	444.694	71.7	607.857	71.7	784.86	71.8	1022.63	71.7	1286.08
71.7	444.217	71.8	607.286	71.8	784.409	71.9	1022.18	71.8	1285.35
71.8	443.74	71.9	606.718	71.9	783.964	72	1021.73	71.9	1284.62
71.9	443.263	72	606.149	72	783.534	72.1	1021.28	72	1283.9
72	442.796	72.1	605.592	72.1	783.117	72.2	1020.84	72.1	1283.19
72.1	442.336	72.2	605.042	72.2	782.697	72.3	1020.4	72.2	1282.48
72.2	441.876	72.3	604.491	72.3	782.271	72.4	1019.97	72.3	1281.77
72.3	441.407	72.4	603.939	72.4	781.844	72.5	1019.55	72.4	1281.06
72.4	440.937	72.5	603.39	72.5	781.416	72.6	1019.13	72.5	1280.37
72.5	440.482	72.6	602.844	72.6	780.978	72.7	1018.7	72.6	1279.68
72.6	440.026	72.7	602.313	72.7	780.546	72.8	1018.27	72.7	1279.01
72.7	439.575	72.8	601.781	72.8	780.125	72.9	1017.85	72.8	1278.33
72.8	439.121	72.9	601.258	72.9	779.708	73	1017.44	72.9	1277.64
72.9	438.666	73	600.734	73	779.289	73.1	1017.04	73	1276.97
73	438.216	73.1	600.224	73.1	778.87	73.2	1016.64	73.1	1276.31
73.1	437.774	73.2	599.715	73.2	778.445	73.3	1016.25	73.2	1275.65
73.2	437.332	73.3	599.204	73.3	778.035	73.4	1015.84	73.3	1275
73.3	436.894	73.4	598.681	73.4	777.63	73.5	1015.44	73.4	1274.35
73.4	436.46	73.5	598.17	73.5	777.229	73.6	1015.05	73.5	1273.7
73.5	436.033	73.6	597.663	73.6	776.819	73.7	1014.65	73.6	1273.06
73.6	435.604	73.7	597.165	73.7	776.425	73.8	1014.27	73.7	1272.42
73.7	435.18	73.8	596.668	73.8	776.036	73.9	1013.88	73.8	1271.79
73.8	434.766	73.9	596.166	73.9	775.642	74	1013.48	73.9	1271.17
73.9	434.353	74	595.663	74	775.257	74.1	1013.11	74	1270.55
74	433.944	74.1	595.166	74.1	774.881	74.2	1012.73	74.1	1269.94
74.1	433.537	74.2	594.673	74.2	774.5	74.3	1012.34	74.2	1269.32
74.2	433.13	74.3	594.185	74.3	774.127	74.4	1011.96	74.3	1268.71
74.3	432.721	74.4	593.705	74.4	773.753	74.5	1011.6	74.4	1268.1
74.4	432.308	74.5	593.246	74.5	773.382	74.6	1011.23	74.5	1267.51
74.5	431.91	74.6	592.773	74.6	773.014	74.7	1010.86	74.6	1266.92
74.6	431.505	74.7	592.3	74.7	772.658	74.8	1010.49	74.7	1266.34
74.7	431.1	74.8	591.836	74.8	772.293	74.9	1010.13	74.8	1265.76
74.8	430.701	74.9	591.376	74.9	771.92	75	1009.76	74.9	1265.19
74.9	430.292	75	590.923	75	771.553	75.1	1009.39	75	1264.61
75	429.883	75.1	590.469	75.1	771.179	75.2	1009.02	75.1	1264.04
75.1	429.478	75.2	589.999	75.2	770.816	75.3	1008.67	75.2	1263.47
75.2	429.077	75.3	589.53	75.3	770.461	75.4	1008.3	75.3	1262.91
75.3	428.675	75.4	589.06	75.4	770.092	75.5	1007.94	75.4	1262.36
75.4	428.284	75.5	588.602	75.5	769.726	75.6	1007.58	75.5	1261.8
75.5	427.898	75.6	588.146	75.6	769.361	75.7	1007.23	75.6	1261.25
75.6	427.5	75.7	587.692	75.7	768.999	75.8	1006.87	75.7	1260.69
75.7	427.112	75.8	587.249	75.8	768.639	75.9	1006.51	75.8	1260.15
75.8	426.739	75.9	586.806	75.9	768.286	76	1006.16	75.9	1259.6
75.9	426.366	76	586.354	76	767.952	76.1	1005.81	76	1259.06
76	426.002	76.1	585.906	76.1	767.607	76.2	1005.47	76.1	1258.52
76.1	425.634	76.2	585.467	76.2	767.261	76.3	1005.12	76.2	1257.98
76.2	425.27	76.3	585.042	76.3	766.918	76.4	1004.78	76.3	1257.45
76.3	424.906	76.4	584.624	76.4	766.571	76.5	1004.43	76.4	1256.9
76.4	424.543	76.5	584.206	76.5	766.231	76.6	1004.1	76.5	1256.37
76.5	424.172	76.6	583.789	76.6	765.902	76.7	1003.75	76.6	1255.84
76.6	423.797	76.7	583.372	76.7	765.564	76.8	1003.41	76.7	1255.31
76.7	423.427	76.8	582.962	76.8	765.227	76.9	1003.08	76.8	1254.79
76.8	423.053	76.9	582.546	76.9	764.895	77	1002.74	76.9	1254.27
76.9	422.684	77	582.129	77	764.562	77.1	1002.4	77	1253.77
77	422.319	77.1	581.72	77.1	764.227	77.2	1002.07	77.1	1253.26
77.1	421.953	77.2	581.301	77.2	763.899	77.3	1001.74	77.2	1252.75
77.2	421.58	77.3	580.882	77.3	763.578	77.4	1001.4	77.3	1252.25
77.3	421.22	77.4	580.479	77.4	763.247	77.5	1001.08	77.4	1251.76
77.4	420.871	77.5	580.068	77.5	762.925	77.6	1000.76	77.5	1251.26
77.5	420.521	77.6	579.66	77.6	762.609	77.7	1000.44	77.6	1250.76
77.6	420.177	77.7	579.26	77.7	762.294	77.8	1000.13	77.7	1250.27
77.7	419.844	77.8	578.857	77.8	761.985	77.9	999.824	77.8	1249.78
77.8	419.526	77.9	578.452	77.9	761.673	78	999.506	77.9	1249.29
77.9	419.195	78	578.055	78	761.358	78.1	999.198	78	1248.79
78	418.85	78.1	577.663	78.1	761.052	78.2	998.892	78.1	1248.3
78.1	418.516	78.2	577.275	78.2	760.75	78.3	998.574	78.2	1247.82
78.2	418.186	78.3	576.885	78.3	760.442	78.4	998.262	78.3	1247.33
78.3	417.864	78.4	576.496	78.4	760.133	78.5	997.958	78.4	1246.86
78.4	417.528	78.5	576.104	78.5	759.828	78.6	997.65	78.5	1246.39
78.5	417.182	78.6	575.718	78.6	759.527	78.7	997.334	78.6	1245.92
78.6	416.842	78.7	575.322	78.7	759.222	78.8	997.02	78.7	1245.46
78.7	416.51	78.8	574.927	78.8	758.922	78.9	996.704	78.8	1244.99
78.8	416.173	78.9	574.534	78.9	758.622	79	996.396	78.9	1244.54
78.9	415.82	79	574.152	79	758.331	79.1	996.103	79	1244.09
79	415.491	79.1	573.773	79.1	758.032	79.2	995.803	79.1	1243.64
79.1	415.171	79.2	573.389	79.2	757.728	79.3	995.497	79.2	1243.17
79.2	414.838	79.3	573.005	79.3	757.432	79.4	995.193	79.3	1242.72
79.3	414.514	79.4	572.625	79.4	757.127	79.5	994.892	79.4	1242.26
79.4	414.19	79.5	572.252	79.5	756.828	79.6	994.596	79.5	1241.8
79.5	413.875	79.6	571.885	79.6	756.529	79.7	994.301	79.6	1241.35
79.6	413.559	79.7	571.527	79.7	756.235	79.8	994.002	79.7	1240.9
79.7	413.247	79.8	571.171	79.8	755.94	79.9	993.708	79.8	1240.45
79.8	412.935	79.9	570.813	79.9	755.65	80	993.422	79.9	1239.99
79.9	412.623	80	570.459	80	755.351	80.1	993.121	80	1239.53
80	412.313	80.1	570.099	80.1	755.043	80.2	992.814	80.1	1239.08
80.1	412.005	80.2	569.741	80.2	754.753	80.3	992.512	80.2	1238.64
80.2	411.698	80.3	569.394	80.3	754.473	80.4	992.216	80.3	1238.21
80.3	411.394	80.4	569.05	80.4	754.189	80.5	991.923	80.4	1237.78
80.4	411.087	80.5	568.703	80.5	753.919	80.6	991.634	80.5	1237.34
80.5	410.768	80.6	568.35	80.6	753.65	80.7	991.343	80.6	1236.91
80.6	410.459	80.7	568.001	80.7	753.38	80.8	991.05	80.7	1236.49
80.7	410.148	80.8	567.66	80.8	753.108	80.9	990.755	80.8	1236.06
80.8	409.832	80.9	567.314	80.9	752.828	81	990.455	80.9	1235.64
80.9	409.519	81	566.968	81	752.545	81.1	990.154	81	1235.23
81	409.219	81.1	566.625	81.1	752.27	81.2	989.869	81.1	1234.82
81.1	408.929	81.2	566.288	81.2	752.002	81.3	989.584	81.2	1234.41
81.2	408.632	81.3	565.94	81.3	751.721	81.4	989.292	81.3	1233.99
81.3	408.327	81.4	565.588	81.4	751.443	81.5	989.011	81.4	1233.58
81.4	408.025	81.5	565.246	81.5	751.173	81.6	988.73	81.5	1233.18
81.5	407.729	81.6	564.899	81.6	750.898	81.7	988.447	81.6	1232.77
81.6	407.435	81.7	564.559	81.7	750.629	81.8	988.158	81.7	1232.37
81.7	407.136	81.8	564.223	81.8	750.355	81.9	987.879	81.8	1231.95
81.8	406.84	81.9	563.883	81.9	750.083	82	987.612	81.9	1231.54
81.9	406.551	82	563.542	82	749.825	82.1	987.343	82	1231.13
82	406.25	82.1	563.205	82.1	749.563	82.2	987.071	82.1	1230.72
82.1	405.948	82.2	562.869	82.2	749.291	82.3	986.798	82.2	1230.31
82.2	405.651	82.3	562.54	82.3	749.037	82.4	986.52	82.3	1229.91
82.3	405.357	82.4	562.213	82.4	748.777	82.5	986.252	82.4	1229.52
82.4	405.064	82.5	561.89	82.5	748.509	82.6	985.988	82.5	1229.12
82.5	404.775	82.6	561.563	82.6	748.246	82.7	985.719	82.6	1228.73
82.6	404.489	82.7	561.23	82.7	747.975	82.8	985.448	82.7	1228.33
82.7	404.198	82.8	560.897	82.8	747.713	82.9	985.18	82.8	1227.94
82.8	403.912	82.9	560.566	82.9	747.458	83	984.916	82.9	1227.55
82.9	403.639	83	560.236	83	747.208	83.1	984.654	83	1227.17
83	403.372	83.1	559.905	83.1	746.947	83.2	984.392	83.1	1226.79
83.1	403.113	83.2	559.587	83.2	746.695	83.3	984.123	83.2	1226.41
83.2	402.847	83.3	559.271	83.3	746.447	83.4	983.857	83.3	1226.04
83.3	402.576	83.4	558.957	83.4	746.184	83.5	983.6	83.4	1225.66
83.4	402.307	83.5	558.635	83.5	745.932	83.6	983.344	83.5	1225.28
83.5	402.032	83.6	558.316	83.6	745.691	83.7	983.084	83.6	1224.9
83.6	401.763	83.7	558.016	83.7	745.441	83.8	982.817	83.7	1224.53
83.7	401.509	83.8	557.72	83.8	745.19	83.9	982.547	83.8	1224.17
83.8	401.259	83.9	557.428	83.9	744.941	84	982.278	83.9	1223.79
83.9	400.994	84	557.126	84	744.694	84.1	982.01	84	1223.41
84	400.724	84.1	556.823	84.1	744.444	84.2	981.749	84.1	1223.04
84.1	400.458	84.2	556.527	84.2	744.191	84.3	981.496	84.2	1222.67
84.2	400.181	84.3	556.226	84.3	743.937	84.4	981.242	84.3	1222.3
84.3	399.914	84.4	555.925	84.4	743.688	84.5	980.975	84.4	1221.94
84.4	399.649	84.5	555.621	84.5	743.438	84.6	980.709	84.5	1221.57
84.5	399.378	84.6	555.323	84.6	743.184	84.7	980.452	84.6	1221.2
84.6	399.123	84.7	555.024	84.7	742.935	84.8	980.197	84.7	1220.83
84.7	398.864	84.8	554.731	84.8	742.707	84.9	979.948	84.8	1220.47
84.8	398.589	84.9	554.435	84.9	742.471	85	979.707	84.9	1220.1
84.9	398.319	85	554.131	85	742.219	85.1	979.468	85	1219.74
85	398.061	85.1	553.831	85.1	741.966	85.2	979.22	85.1	1219.38
85.1	397.804	85.2	553.532	85.2	741.716	85.3	978.962	85.2	1219.01
85.2	397.552	85.3	553.238	85.3	741.472	85.4	978.697	85.3	1218.66
85.3	397.309	85.4	552.949	85.4	741.232	85.5	978.445	85.4	1218.3
85.4	397.058	85.5	552.659	85.5	740.995	85.6	978.205	85.5	1217.94
85.5	396.805	85.6	552.376	85.6	740.755	85.7	977.965	85.6	1217.58
85.6	396.551	85.7	552.097	85.7	740.526	85.8	977.722	85.7	1217.22
85.7	396.3	85.8	551.812	85.8	740.3	85.9	977.483	85.8	1216.87
85.8	396.057	85.9	551.514	85.9	740.061	86	977.236	85.9	1216.52
85.9	395.823	86	551.225	86	739.822	86.1	976.986	86	1216.17
86	395.579	86.1	550.954	86.1	739.603	86.2	976.734	86.1	1215.82
86.1	395.35	86.2	550.681	86.2	739.386	86.3	976.486	86.2	1215.47
86.2	395.118	86.3	550.407	86.3	739.165	86.4	976.243	86.3	1215.13
86.3	394.87	86.4	550.131	86.4	738.942	86.5	975.997	86.4	1214.78
86.4	394.613	86.5	549.851	86.5	738.706	86.6	975.752	86.5	1214.43
86.5	394.371	86.6	549.575	86.6	738.478	86.7	975.499	86.6	1214.07
86.6	394.138	86.7	549.292	86.7	738.26	86.8	975.242	86.7	1213.73
86.7	393.901	86.8	549.016	86.8	738.032	86.9	974.992	86.8	1213.4
86.8	393.665	86.9	548.746	86.9	737.802	87	974.739	86.9	1213.05
86.9	393.423	87	548.472	87	737.584	87.1	974.502	87	1212.71
87	393.176	87.1	548.191	87.1	737.37	87.2	974.28	87.1	1212.38
87.1	392.934	87.2	547.907	87.2	737.149	87.3	974.051	87.2	1212.04
87.2	392.69	87.3	547.628	87.3	736.92	87.4	973.817	87.3	1211.7
87.3	392.448	87.4	547.353	87.4	736.692	87.5	973.581	87.4	1211.37
87.4	392.217	87.5	547.078	87.5	736.463	87.6	973.34	87.5	1211.04
87.5	391.99	87.6	546.797	87.6	736.233	87.7	973.108	87.6	1210.71
87.6	391.752	87.7	546.529	87.7	736.019	87.8	972.876	87.7	1210.38
87.7	391.526	87.8	546.271	87.8	735.803	87.9	972.645	87.8	1210.05
87.8	391.302	87.9	546.01	87.9	735.584	88	972.407	87.9	1209.72
87.9	391.069	88	545.76	88	735.353	88.1	972.168	88	1209.4
88	390.834	88.1	545.509	88.1	735.122	88.2	971.925	88.1	1209.08
88.1	390.609	88.2	545.252	88.2	734.888	88.3	971.684	88.2	1208.76
88.2	390.38	88.3	544.994	88.3	734.668	88.4	971.443	88.3	1208.44
88.3	390.159	88.4	544.729	88.4	734.458	88.5	971.209	88.4	1208.12
88.4	389.926	88.5	544.462	88.5	734.249	88.6	970.974	88.5	1207.8
88.5	389.692	88.6	544.195	88.6	734.047	88.7	970.748	88.6	1207.49
88.6	389.461	88.7	543.933	88.7	733.84	88.8	970.528	88.7	1207.17
88.7	389.231	88.8	543.668	88.8	733.634	88.9	970.302	88.8	1206.85
88.8	389.001	88.9	543.406	88.9	733.418	89	970.079	88.9	1206.54
88.9	388.776	89	543.14	89	733.195	89.1	969.858	89	1206.21
89	388.555	89.1	542.866	89.1	732.979	89.2	969.633	89.1	1205.89
89.1	388.335	89.2	542.609	89.2	732.771	89.3	969.409	89.2	1205.57
89.2	388.118	89.3	542.358	89.3	732.562	89.4	969.184	89.3	1205.26
89.3	387.897	89.4	542.107	89.4	732.353	89.5	968.955	89.4	1204.94
89.4	387.672	89.5	541.861	89.5	732.148	89.6	968.73	89.5	1204.61
89.5	387.457	89.6	541.618	89.6	731.937	89.7	968.505	89.6	1204.29
89.6	387.24	89.7	541.377	89.7	731.735	89.8	968.268	89.7	1203.97
89.7	387.028	89.8	541.117	89.8	731.526	89.9	968.032	89.8	1203.65
89.8	386.81	89.9	540.857	89.9	731.314	90	967.801	89.9	1203.33
89.9	386.587	90	540.612	90	731.101	90.1	967.57	90	1203.02
90	386.368	90.1	540.367	90.1	730.893	90.2	967.343	90.1	1202.71
90.1	386.153	90.2	540.122	90.2	730.699	90.3	967.126	90.2	1202.4
90.2	385.939	90.3	539.867	90.3	730.504	90.4	966.894	90.3	1202.09
90.3	385.724	90.4	539.615	90.4	730.293	90.5	966.66	90.4	1201.77
90.4	385.513	90.5	539.374	90.5	730.093	90.6	966.439	90.5	1201.47
90.5	385.308	90.6	539.131	90.6	729.891	90.7	966.214	90.6	1201.16
90.6	385.1	90.7	538.891	90.7	729.697	90.8	965.99	90.7	1200.86
90.7	384.888	90.8	538.646	90.8	729.495	90.9	965.776	90.8	1200.56
90.8	384.68	90.9	538.407	90.9	729.295	91	965.555	90.9	1200.25
90.9	384.47	91	538.171	91	729.09	91.1	965.33	91	1199.94
91	384.262	91.1	537.932	91.1	728.893	91.2	965.109	91.1	1199.63
91.1	384.053	91.2	537.694	91.2	728.697	91.3	964.882	91.2	1199.34
91.2	383.848	91.3	537.459	91.3	728.496	91.4	964.655	91.3	1199.04
91.3	383.638	91.4	537.222	91.4	728.286	91.5	964.44	91.4	1198.73
91.4	383.426	91.5	536.986	91.5	728.079	91.6	964.22	91.5	1198.43
91.5	383.219	91.6	536.755	91.6	727.883	91.7	963.996	91.6	1198.13
91.6	383.023	91.7	536.533	91.7	727.7	91.8	963.781	91.7	1197.83
91.7	382.82	91.8	536.301	91.8	727.514	91.9	963.564	91.8	1197.54
91.8	382.609	91.9	536.069	91.9	727.323	92	963.349	91.9	1197.24
91.9	382.405	92	535.845	92	727.131	92.1	963.147	92	1196.95
92	382.205	92.1	535.622	92.1	726.939	92.2	962.935	92.1	1196.66
92.1	382.009	92.2	535.386	92.2	726.749	92.3	962.72	92.2	1196.37
92.2	381.815	92.3	535.15	92.3	726.558	92.4	962.505	92.3	1196.08
92.3	381.624	92.4	534.919	92.4	726.367	92.5	962.289	92.4	1195.78
92.4	381.427	92.5	534.692	92.5	726.171	92.6	962.08	92.5	1195.5
92.5	381.225	92.6	534.483	92.6	725.98	92.7	961.868	92.6	1195.2
92.6	381.029	92.7	534.264	92.7	725.792	92.8	961.663	92.7	1194.92
92.7	380.832	92.8	534.028	92.8	725.602	92.9	961.463	92.8	1194.64
92.8	380.626	92.9	533.799	92.9	725.413	93	961.252	92.9	1194.36
92.9	380.422	93	533.581	93	725.224	93.1	961.034	93	1194.07
93	380.215	93.1	533.361	93.1	725.029	93.2	960.826	93.1	1193.78
93.1	380.019	93.2	533.133	93.2	724.832	93.3	960.62	93.2	1193.48
93.2	379.825	93.3	532.91	93.3	724.639	93.4	960.408	93.3	1193.19
93.3	379.621	93.4	532.684	93.4	724.454	93.5	960.191	93.4	1192.9
93.4	379.425	93.5	532.461	93.5	724.269	93.6	959.987	93.5	1192.62
93.5	379.228	93.6	532.234	93.6	724.084	93.7	959.776	93.6	1192.33
93.6	379.03	93.7	532.003	93.7	723.89	93.8	959.567	93.7	1192.04
93.7	378.83	93.8	531.768	93.8	723.698	93.9	959.358	93.8	1191.75
93.8	378.633	93.9	531.536	93.9	723.51	94	959.145	93.9	1191.45
93.9	378.443	94	531.314	94	723.326	94.1	958.937	94	1191.15
94	378.254	94.1	531.099	94.1	723.141	94.2	958.73	94.1	1190.86
94.1	378.074	94.2	530.889	94.2	722.96	94.3	958.518	94.2	1190.58
94.2	377.893	94.3	530.668	94.3	722.771	94.4	958.315	94.3	1190.31
94.3	377.706	94.4	530.449	94.4	722.582	94.5	958.111	94.4	1190.03
94.4	377.516	94.5	530.231	94.5	722.394	94.6	957.905	94.5	1189.75
94.5	377.324	94.6	530.009	94.6	722.21	94.7	957.697	94.6	1189.48
94.6	377.133	94.7	529.788	94.7	722.023	94.8	957.49	94.7	1189.2
94.7	376.953	94.8	529.58	94.8	721.839	94.9	957.28	94.8	1188.91
94.8	376.77	94.9	529.371	94.9	721.659	95	957.081	94.9	1188.64
94.9	376.577	95	529.162	95	721.475	95.1	956.873	95	1188.36
95	376.392	95.1	528.952	95.1	721.293	95.2	956.66	95.1	1188.1
95.1	376.211	95.2	528.737	95.2	721.11	95.3	956.458	95.2	1187.83
95.2	376.027	95.3	528.516	95.3	720.931	95.4	956.255	95.3	1187.55
95.3	375.843	95.4	528.294	95.4	720.746	95.5	956.051	95.4	1187.26
95.4	375.659	95.5	528.083	95.5	720.561	95.6	955.86	95.5	1186.98
95.5	375.476	95.6	527.871	95.6	720.377	95.7	955.663	95.6	1186.69
95.6	375.292	95.7	527.659	95.7	720.196	95.8	955.455	95.7	1186.41
95.7	375.114	95.8	527.453	95.8	720.017	95.9	955.253	95.8	1186.14
95.8	374.934	95.9	527.251	95.9	719.841	96	955.061	95.9	1185.88
95.9	374.762	96	527.051	96	719.667	96.1	954.876	96	1185.62
96	374.585	96.1	526.846	96.1	719.488	96.2	954.685	96.1	1185.36
96.1	374.409	96.2	526.632	96.2	719.303	96.3	954.485	96.2	1185.08
96.2	374.228	96.3	526.424	96.3	719.126	96.4	954.294	96.3	1184.81
96.3	374.045	96.4	526.228	96.4	718.951	96.5	954.101	96.4	1184.55
96.4	373.867	96.5	526.035	96.5	718.775	96.6	953.906	96.5	1184.3
96.5	373.698	96.6	525.838	96.6	718.601	96.7	953.71	96.6	1184.04
96.6	373.52	96.7	525.639	96.7	718.429	96.8	953.511	96.7	1183.77
96.7	373.342	96.8	525.44	96.8	718.259	96.9	953.318	96.8	1183.51
96.8	373.165	96.9	525.245	96.9	718.098	97	953.122	96.9	1183.25
96.9	372.987	97	525.041	97	717.934	97.1	952.927	97	1182.99
97	372.811	97.1	524.839	97.1	717.76	97.2	952.737	97.1	1182.73
97.1	372.629	97.2	524.64	97.2	717.585	97.3	952.538	97.2	1182.47
97.2	372.451	97.3	524.435	97.3	717.414	97.4	952.341	97.3	1182.2
97.3	372.267	97.4	524.239	97.4	717.246	97.5	952.146	97.4	1181.94
97.4	372.088	97.5	524.046	97.5	717.075	97.6	951.958	97.5	1181.68
97.5	371.916	97.6	523.847	97.6	716.898	97.7	951.769	97.6	1181.42
97.6	371.744	97.7	523.643	97.7	716.728	97.8	951.578	97.7	1181.16
97.7	371.574	97.8	523.444	97.8	716.568	97.9	951.381	97.8	1180.9
97.8	371.403	97.9	523.251	97.9	716.399	98	951.188	97.9	1180.63
97.9	371.232	98	523.055	98	716.24	98.1	951.003	98	1180.36
98	371.058	98.1	522.853	98.1	716.073	98.2	950.808	98.1	1180.1
98.1	370.886	98.2	522.659	98.2	715.904	98.3	950.615	98.2	1179.84
98.2	370.718	98.3	522.471	98.3	715.729	98.4	950.429	98.3	1179.57
98.3	370.554	98.4	522.282	98.4	715.551	98.5	950.242	98.4	1179.31
98.4	370.39	98.5	522.093	98.5	715.378	98.6	950.057	98.5	1179.04
98.5	370.223	98.6	521.912	98.6	715.214	98.7	949.869	98.6	1178.78
98.6	370.062	98.7	521.723	98.7	715.05	98.8	949.683	98.7	1178.53
98.7	369.896	98.8	521.534	98.8	714.883	98.9	949.495	98.8	1178.28
98.8	369.733	98.9	521.344	98.9	714.717	99	949.308	98.9	1178.03
98.9	369.572	99	521.16	99	714.556	99.1	949.118	99	1177.77
99	369.406	99.1	520.971	99.1	714.388	99.2	948.931	99.1	1177.52
99.1	369.25	99.2	520.775	99.2	714.224	99.3	948.743	99.2	1177.27
99.2	369.088	99.3	520.585	99.3	714.067	99.4	948.552	99.3	1177.03
99.3	368.921	99.4	520.396	99.4	713.911	99.5	948.357	99.4	1176.78
99.4	368.753	99.5	520.202	99.5	713.745	99.6	948.162	99.5	1176.53
99.5	368.587	99.6	520.009	99.6	713.585	99.7	947.97	99.6	1176.29
99.6	368.422	99.7	519.821	99.7	713.427	99.8	947.788	99.7	1176.04
99.7	368.257	99.8	519.631	99.8	713.269	99.9	947.593	99.8	1175.79
99.8	368.097	99.9	519.44	99.9	713.109	100	947.402	99.9	1175.53
99.9	367.937	100	519.249	100	712.949	100.1	947.223	100	1175.27
100	367.77	100.1	519.059	100.1	712.802	100.2	947.034	100.1	1175.02
100.1	367.609	100.2	518.872	100.2	712.647	100.3	946.846	100.2	1174.78
100.2	367.442	100.3	518.689	100.3	712.484	100.4	946.659	100.3	1174.53
100.3	367.281	100.4	518.509	100.4	712.325	100.5	946.466	100.4	1174.29
100.4	367.13	100.5	518.325	100.5	712.169	100.6	946.278	100.5	1174.03
100.5	366.971	100.6	518.142	100.6	712.017	100.7	946.097	100.6	1173.79
100.6	366.812	100.7	517.97	100.7	711.867	100.8	945.914	100.7	1173.54
100.7	366.657	100.8	517.796	100.8	711.705	100.9	945.731	100.8	1173.29
100.8	366.499	100.9	517.618	100.9	711.542	101	945.558	100.9	1173.04
100.9	366.34	101	517.438	101	711.385	101.1	945.379	101	1172.79
101	366.182	101.1	517.262	101.1	711.229	101.2	945.202	101.1	1172.55
101.1	366.028	101.2	517.092	101.2	711.07	101.3	945.032	101.2	1172.31
101.2	365.879	101.3	516.915	101.3	710.912	101.4	944.853	101.3	1172.06
101.3	365.72	101.4	516.735	101.4	710.75	101.5	944.672	101.4	1171.81
101.4	365.556	101.5	516.56	101.5	710.59	101.6	944.497	101.5	1171.55
101.5	365.399	101.6	516.387	101.6	710.433	101.7	944.316	101.6	1171.31
101.6	365.245	101.7	516.207	101.7	710.278	101.8	944.139	101.7	1171.07
101.7	365.093	101.8	516.036	101.8	710.125	101.9	943.974	101.8	1170.83
101.8	364.937	101.9	515.861	101.9	709.972	102	943.803	101.9	1170.6
101.9	364.785	102	515.679	102	709.816	102.1	943.625	102	1170.35
102	364.633	102.1	515.502	102.1	709.662	102.2	943.442	102.1	1170.12
102.1	364.487	102.2	515.322	102.2	709.504	102.3	943.262	102.2	1169.88
102.2	364.335	102.3	515.138	102.3	709.356	102.4	943.089	102.3	1169.65
102.3	364.182	102.4	514.962	102.4	709.203	102.5	942.909	102.4	1169.41
102.4	364.034	102.5	514.78	102.5	709.051	102.6	942.731	102.5	1169.16
102.5	363.885	102.6	514.6	102.6	708.9	102.7	942.554	102.6	1168.92
102.6	363.733	102.7	514.427	102.7	708.749	102.8	942.37	102.7	1168.68
102.7	363.581	102.8	514.261	102.8	708.605	102.9	942.186	102.8	1168.44
102.8	363.424	102.9	514.09	102.9	708.452	103	942.006	102.9	1168.21
102.9	363.272	103	513.914	103	708.293	103.1	941.829	103	1167.96
103	363.117	103.1	513.74	103.1	708.147	103.2	941.652	103.1	1167.73
103.1	362.973	103.2	513.561	103.2	708	103.3	941.471	103.2	1167.5
103.2	362.825	103.3	513.39	103.3	707.854	103.4	941.304	103.3	1167.27
103.3	362.679	103.4	513.232	103.4	707.712	103.5	941.121	103.4	1167.05
103.4	362.538	103.5	513.06	103.5	707.564	103.6	940.949	103.5	1166.82
103.5	362.397	103.6	512.891	103.6	707.42	103.7	940.776	103.6	1166.6
103.6	362.256	103.7	512.718	103.7	707.267	103.8	940.601	103.7	1166.38
103.7	362.111	103.8	512.554	103.8	707.118	103.9	940.43	103.8	1166.15
103.8	361.965	103.9	512.389	103.9	706.971	104	940.261	103.9	1165.91
103.9	361.82	104	512.232	104	706.825	104.1	940.086	104	1165.68
104	361.684	104.1	512.074	104.1	706.673	104.2	939.911	104.1	1165.45
104.1	361.542	104.2	511.907	104.2	706.524	104.3	939.734	104.2	1165.21
104.2	361.396	104.3	511.742	104.3	706.375	104.4	939.554	104.3	1164.98
104.3	361.254	104.4	511.577	104.4	706.226	104.5	939.383	104.4	1164.74
104.4	361.11	104.5	511.415	104.5	706.085	104.6	939.215	104.5	1164.51
104.5	360.966	104.6	511.249	104.6	705.935	104.7	939.035	104.6	1164.28
104.6	360.819	104.7	511.078	104.7	705.78	104.8	938.867	104.7	1164.04
104.7	360.669	104.8	510.915	104.8	705.629	104.9	938.703	104.8	1163.8
104.8	360.528	104.9	510.755	104.9	705.478	105	938.538	104.9	1163.58
104.9	360.394	105	510.596	105	705.331	105.1	938.365	105	1163.36
105	360.255	105.1	510.434	105.1	705.188	105.2	938.197	105.1	1163.12
105.1	360.114	105.2	510.272	105.2	705.041	105.3	938.032	105.2	1162.89
105.2	359.972	105.3	510.106	105.3	704.884	105.4	937.863	105.3	1162.66
105.3	359.828	105.4	509.931	105.4	704.732	105.5	937.697	105.4	1162.43
105.4	359.686	105.5	509.767	105.5	704.591	105.6	937.525	105.5	1162.2
105.5	359.548	105.6	509.606	105.6	704.451	105.7	937.357	105.6	1161.97
105.6	359.41	105.7	509.449	105.7	704.314	105.8	937.184	105.7	1161.73
105.7	359.273	105.8	509.283	105.8	704.168	105.9	937.02	105.8	1161.51
105.8	359.128	105.9	509.118	105.9	704.029	106	936.86	105.9	1161.29
105.9	358.985	106	508.957	106	703.889	106.1	936.698	106	1161.07
106	358.845	106.1	508.802	106.1	703.749	106.2	936.528	106.1	1160.85
106.1	358.709	106.2	508.641	106.2	703.604	106.3	936.359	106.2	1160.63
106.2	358.567	106.3	508.483	106.3	703.467	106.4	936.193	106.3	1160.41
106.3	358.428	106.4	508.333	106.4	703.329	106.5	936.025	106.4	1160.19
106.4	358.286	106.5	508.173	106.5	703.189	106.6	935.858	106.5	1159.97
106.5	358.148	106.6	508.014	106.6	703.045	106.7	935.685	106.6	1159.75
106.6	358.015	106.7	507.857	106.7	702.905	106.8	935.514	106.7	1159.55
106.7	357.877	106.8	507.698	106.8	702.762	106.9	935.343	106.8	1159.34
106.8	357.736	106.9	507.538	106.9	702.622	107	935.175	106.9	1159.12
106.9	357.602	107	507.387	107	702.482	107.1	935.007	107	1158.91
107	357.469	107.1	507.238	107.1	702.344	107.2	934.845	107.1	1158.7
107.1	357.339	107.2	507.084	107.2	702.206	107.3	934.678	107.2	1158.48
107.2	357.204	107.3	506.926	107.3	702.065	107.4	934.512	107.3	1158.25
107.3	357.059	107.4	506.782	107.4	701.926	107.5	934.357	107.4	1158.04
107.4	356.922	107.5	506.639	107.5	701.794	107.6	934.197	107.5	1157.82
107.5	356.793	107.6	506.49	107.6	701.666	107.7	934.027	107.6	1157.6
107.6	356.66	107.7	506.338	107.7	701.53	107.8	933.859	107.7	1157.38
107.7	356.527	107.8	506.191	107.8	701.391	107.9	933.69	107.8	1157.16
107.8	356.399	107.9	506.038	107.9	701.248	108	933.528	107.9	1156.94
107.9	356.266	108	505.883	108	701.109	108.1	933.367	108	1156.71
108	356.132	108.1	505.732	108.1	700.977	108.2	933.204	108.1	1156.49
108.1	356.001	108.2	505.58	108.2	700.845	108.3	933.041	108.2	1156.26
108.2	355.867	108.3	505.423	108.3	700.707	108.4	932.885	108.3	1156.05
108.3	355.731	108.4	505.266	108.4	700.575	108.5	932.729	108.4	1155.84
108.4	355.601	108.5	505.113	108.5	700.44	108.6	932.568	108.5	1155.62
108.5	355.472	108.6	504.968	108.6	700.305	108.7	932.408	108.6	1155.41
108.6	355.346	108.7	504.824	108.7	700.168	108.8	932.254	108.7	1155.19
108.7	355.219	108.8	504.677	108.8	700.035	108.9	932.094	108.8	1154.98
108.8	355.095	108.9	504.525	108.9	699.903	109	931.936	108.9	1154.76
108.9	354.97	109	504.371	109	699.772	109.1	931.77	109	1154.55
109	354.842	109.1	504.215	109.1	699.64	109.2	931.605	109.1	1154.34
109.1	354.714	109.2	504.063	109.2	699.503	109.3	931.443	109.2	1154.13
109.2	354.584	109.3	503.919	109.3	699.373	109.4	931.277	109.3	1153.92
109.3	354.457	109.4	503.772	109.4	699.244	109.5	931.115	109.4	1153.72
109.4	354.33	109.5	503.614	109.5	699.107	109.6	930.962	109.5	1153.5
109.5	354.196	109.6	503.46	109.6	698.972	109.7	930.801	109.6	1153.3
109.6	354.063	109.7	503.308	109.7	698.839	109.8	930.642	109.7	1153.08
109.7	353.935	109.8	503.168	109.8	698.711	109.9	930.489	109.8	1152.87
109.8	353.814	109.9	503.026	109.9	698.58	110	930.337	109.9	1152.67
109.9	353.687	110	502.88	110	698.44	110.1	930.173	110	1152.46
110	353.559	110.1	502.732	110.1	698.302	110.2	930.011	110.1	1152.25
110.1	353.426	110.2	502.583	110.2	698.169	110.3	929.848	110.2	1152.04
110.2	353.298	110.3	502.442	110.3	698.039	110.4	929.689	110.3	1151.83
110.3	353.167	110.4	502.299	110.4	697.907	110.5	929.532	110.4	1151.62
110.4	353.038	110.5	502.16	110.5	697.778	110.6	929.372	110.5	1151.42
110.5	352.914	110.6	502.018	110.6	697.643	110.7	929.209	110.6	1151.21
110.6	352.786	110.7	501.875	110.7	697.512	110.8	929.05	110.7	1151
110.7	352.661	110.8	501.735	110.8	697.383	110.9	928.888	110.8	1150.78
110.8	352.54	110.9	501.588	110.9	697.248	111	928.726	110.9	1150.56
110.9	352.414	111	501.448	111	697.116	111.1	928.57	111	1150.35
111	352.291	111.1	501.301	111.1	696.986	111.2	928.417	111.1	1150.13
111.1	352.169	111.2	501.156	111.2	696.858	111.3	928.269	111.2	1149.92
111.2	352.04	111.3	501.015	111.3	696.739	111.4	928.12	111.3	1149.72
111.3	351.912	111.4	500.874	111.4	696.61	111.5	927.963	111.4	1149.52
111.4	351.787	111.5	500.737	111.5	696.485	111.6	927.809	111.5	1149.31
111.5	351.661	111.6	500.593	111.6	696.356	111.7	927.658	111.6	1149.11
111.6	351.535	111.7	500.452	111.7	696.225	111.8	927.504	111.7	1148.91
111.7	351.413	111.8	500.311	111.8	696.093	111.9	927.344	111.8	1148.7
111.8	351.293	111.9	500.171	111.9	695.965	112	927.188	111.9	1148.5
111.9	351.171	112	500.029	112	695.838	112.1	927.041	112	1148.29
112	351.05	112.1	499.887	112.1	695.711	112.2	926.891	112.1	1148.1
112.1	350.928	112.2	499.745	112.2	695.576	112.3	926.743	112.2	1147.9
112.2	350.81	112.3	499.608	112.3	695.449	112.4	926.599	112.3	1147.71
112.3	350.689	112.4	499.468	112.4	695.326	112.5	926.451	112.4	1147.51
112.4	350.567	112.5	499.335	112.5	695.203	112.6	926.299	112.5	1147.32
112.5	350.445	112.6	499.207	112.6	695.077	112.7	926.144	112.6	1147.11
112.6	350.325	112.7	499.069	112.7	694.951	112.8	925.993	112.7	1146.91
112.7	350.203	112.8	498.934	112.8	694.82	112.9	925.847	112.8	1146.72
112.8	350.082	112.9	498.802	112.9	694.695	113	925.701	112.9	1146.52
112.9	349.966	113	498.665	113	694.569	113.1	925.548	113	1146.32
113	349.845	113.1	498.526	113.1	694.443	113.2	925.399	113.1	1146.13
113.1	349.725	113.2	498.393	113.2	694.319	113.3	925.248	113.2	1145.94
113.2	349.604	113.3	498.254	113.3	694.196	113.4	925.097	113.3	1145.74
113.3	349.486	113.4	498.12	113.4	694.069	113.5	924.945	113.4	1145.55
113.4	349.372	113.5	497.99	113.5	693.939	113.6	924.791	113.5	1145.34
113.5	349.252	113.6	497.857	113.6	693.81	113.7	924.641	113.6	1145.14
113.6	349.131	113.7	497.721	113.7	693.683	113.8	924.49	113.7	1144.94
113.7	349.009	113.8	497.582	113.8	693.559	113.9	924.34	113.8	1144.74
113.8	348.886	113.9	497.447	113.9	693.434	114	924.189	113.9	1144.54
113.9	348.765	114	497.314	114	693.313	114.1	924.039	114	1144.34
114	348.649	114.1	497.172	114.1	693.191	114.2	923.895	114.1	1144.15
114.1	348.53	114.2	497.04	114.2	693.071	114.3	923.741	114.2	1143.96
114.2	348.417	114.3	496.909	114.3	692.946	114.4	923.587	114.3	1143.77
114.3	348.3	114.4	496.785	114.4	692.821	114.5	923.44	114.4	1143.57
114.4	348.187	114.5	496.654	114.5	692.696	114.6	923.292	114.5	1143.37
114.5	348.068	114.6	496.525	114.6	692.574	114.7	923.144	114.6	1143.17
114.6	347.953	114.7	496.395	114.7	692.447	114.8	923.001	114.7	1142.98
114.7	347.841	114.8	496.262	114.8	692.325	114.9	922.853	114.8	1142.8
114.8	347.737	114.9	496.127	114.9	692.2	115	922.712	114.9	1142.61
114.9	347.62	115	495.998	115	692.079	115.1	922.56	115	1142.42
115	347.511	115.1	495.862	115.1	691.96	115.2	922.421	115.1	1142.24
115.1	347.397	115.2	495.725	115.2	691.842	115.3	922.279	115.2	1142.05
115.2	347.283	115.3	495.591	115.3	691.722	115.4	922.135	115.3	1141.86
115.3	347.17	115.4	495.473	115.4	691.601	115.5	921.991	115.4	1141.67
115.4	347.064	115.5	495.349	115.5	691.49	115.6	921.846	115.5	1141.48
115.5	346.957	115.6	495.22	115.6	691.384	115.7	921.701	115.6	1141.29
115.6	346.847	115.7	495.097	115.7	691.275	115.8	921.556	115.7	1141.1
115.7	346.737	115.8	494.963	115.8	691.156	115.9	921.402	115.8	1140.91
115.8	346.623	115.9	494.823	115.9	691.04	116	921.251	115.9	1140.72
115.9	346.509	116	494.69	116	690.923	116.1	921.106	116	1140.52
116	346.397	116.1	494.561	116.1	690.806	116.2	920.962	116.1	1140.32
116.1	346.283	116.2	494.434	116.2	690.686	116.3	920.813	116.2	1140.13
116.2	346.169	116.3	494.306	116.3	690.564	116.4	920.667	116.3	1139.94
116.3	346.056	116.4	494.181	116.4	690.438	116.5	920.529	116.4	1139.75
116.4	345.943	116.5	494.056	116.5	690.318	116.6	920.382	116.5	1139.55
116.5	345.832	116.6	493.923	116.6	690.199	116.7	920.235	116.6	1139.36
116.6	345.72	116.7	493.794	116.7	690.08	116.8	920.1	116.7	1139.17
116.7	345.616	116.8	493.67	116.8	689.966	116.9	919.958	116.8	1138.99
116.8	345.51	116.9	493.538	116.9	689.851	117	919.817	116.9	1138.79
116.9	345.399	117	493.412	117	689.735	117.1	919.675	117	1138.61
117	345.293	117.1	493.289	117.1	689.615	117.2	919.527	117.1	1138.43
117.1	345.183	117.2	493.166	117.2	689.496	117.3	919.382	117.2	1138.24
117.2	345.071	117.3	493.038	117.3	689.384	117.4	919.237	117.3	1138.06
117.3	344.963	117.4	492.912	117.4	689.266	117.5	919.094	117.4	1137.88
117.4	344.859	117.5	492.787	117.5	689.147	117.6	918.952	117.5	1137.7
117.5	344.753	117.6	492.665	117.6	689.026	117.7	918.809	117.6	1137.51
117.6	344.646	117.7	492.54	117.7	688.906	117.8	918.672	117.7	1137.32
117.7	344.532	117.8	492.415	117.8	688.785	117.9	918.532	117.8	1137.14
117.8	344.419	117.9	492.291	117.9	688.67	118	918.392	117.9	1136.95
117.9	344.31	118	492.169	118	688.556	118.1	918.249	118	1136.76
118	344.199	118.1	492.046	118.1	688.433	118.2	918.111	118.1	1136.57
118.1	344.088	118.2	491.924	118.2	688.308	118.3	917.969	118.2	1136.38
118.2	343.975	118.3	491.808	118.3	688.186	118.4	917.83	118.3	1136.2
118.3	343.862	118.4	491.693	118.4	688.067	118.5	917.696	118.4	1136.02
118.4	343.751	118.5	491.581	118.5	687.955	118.6	917.558	118.5	1135.84
118.5	343.645	118.6	491.465	118.6	687.842	118.7	917.415	118.6	1135.66
118.6	343.537	118.7	491.348	118.7	687.736	118.8	917.274	118.7	1135.47
118.7	343.436	118.8	491.231	118.8	687.625	118.9	917.135	118.8	1135.29
118.8	343.33	118.9	491.113	118.9	687.513	119	916.989	118.9	1135.1
118.9	343.225	119	490.991	119	687.397	119.1	916.846	119	1134.92
119	343.121	119.1	490.87	119.1	687.283	119.2	916.705	119.1	1134.73
119.1	343.013	119.2	490.75	119.2	687.168	119.3	916.565	119.2	1134.54
119.2	342.906	119.3	490.632	119.3	687.048	119.4	916.428	119.3	1134.36
119.3	342.801	119.4	490.519	119.4	686.933	119.5	916.29	119.4	1134.18
119.4	342.7	119.5	490.401	119.5	686.82	119.6	916.154	119.5	1134
119.5	342.597	119.6	490.289	119.6	686.712	119.7	916.018	119.6	1133.82
119.6	342.495	119.7	490.176	119.7	686.605	119.8	915.879	119.7	1133.65
119.7	342.394	119.8	490.059	119.8	686.496	119.9	915.741	119.8	1133.47
119.8	342.292	119.9	489.943	119.9	686.388	120	915.605	119.9	1133.28
119.9	342.19	120	489.825	120	686.273	120.1	915.47	120	1133.1
120	342.089	120.1	489.707	120.1	686.166	120.2	915.34	120.1	1132.92
120.1	341.99	120.2	489.592	120.2	686.059	120.3	915.203	120.2	1132.75
120.2	341.893	120.3	489.47	120.3	685.949	120.4	915.07	120.3	1132.56
120.3	341.79	120.4	489.352	120.4	685.84	120.5	914.933	120.4	1132.39
120.4	341.692	120.5	489.236	120.5	685.734	120.6	914.796	120.5	1132.21
120.5	341.592	120.6	489.118	120.6	685.629	120.7	914.657	120.6	1132.04
120.6	341.491	120.7	488.999	120.7	685.523	120.8	914.524	120.7	1131.86
120.7	341.39	120.8	488.886	120.8	685.419	120.9	914.386	120.8	1131.68
120.8	341.291	120.9	488.768	120.9	685.308	121	914.251	120.9	1131.5
120.9	341.186	121	488.65	121	685.198	121.1	914.118	121	1131.32
121	341.091	121.1	488.529	121.1	685.086	121.2	913.989	121.1	1131.14
121.1	340.992	121.2	488.414	121.2	684.977	121.3	913.857	121.2	1130.96
121.2	340.9	121.3	488.299	121.3	684.869	121.4	913.727	121.3	1130.77
121.3	340.803	121.4	488.184	121.4	684.76	121.5	913.588	121.4	1130.59
121.4	340.709	121.5	488.064	121.5	684.647	121.6	913.451	121.5	1130.42
121.5	340.614	121.6	487.949	121.6	684.535	121.7	913.322	121.6	1130.24
121.6	340.52	121.7	487.841	121.7	684.426	121.8	913.192	121.7	1130.06
121.7	340.426	121.8	487.724	121.8	684.317	121.9	913.063	121.8	1129.9
121.8	340.326	121.9	487.607	121.9	684.21	122	912.934	121.9	1129.72
121.9	340.231	122	487.492	122	684.105	122.1	912.801	122	1129.55
122	340.131	122.1	487.374	122.1	683.993	122.2	912.667	122.1	1129.37
122.1	340.032	122.2	487.26	122.2	683.888	122.3	912.531	122.2	1129.2
122.2	339.937	122.3	487.143	122.3	683.779	122.4	912.394	122.3	1129.02
122.3	339.84	122.4	487.029	122.4	683.669	122.5	912.259	122.4	1128.85
122.4	339.74	122.5	486.92	122.5	683.563	122.6	912.123	122.5	1128.68
122.5	339.646	122.6	486.808	122.6	683.452	122.7	911.991	122.6	1128.52
122.6	339.548	122.7	486.699	122.7	683.344	122.8	911.857	122.7	1128.35
122.7	339.447	122.8	486.586	122.8	683.235	122.9	911.73	122.8	1128.18
122.8	339.341	122.9	486.474	122.9	683.126	123	911.606	122.9	1128.02
122.9	339.249	123	486.366	123	683.022	123.1	911.474	123	1127.86
123	339.155	123.1	486.256	123.1	682.922	123.2	911.342	123.1	1127.69
123.1	339.06	123.2	486.149	123.2	682.819	123.3	911.212	123.2	1127.53
123.2	338.966	123.3	486.043	123.3	682.716	123.4	911.082	123.3	1127.36
123.3	338.868	123.4	485.933	123.4	682.609	123.5	910.947	123.4	1127.19
123.4	338.77	123.5	485.821	123.5	682.503	123.6	910.812	123.5	1127.02
123.5	338.669	123.6	485.715	123.6	682.399	123.7	910.677	123.6	1126.85
123.6	338.577	123.7	485.605	123.7	682.292	123.8	910.545	123.7	1126.68
123.7	338.48	123.8	485.494	123.8	682.183	123.9	910.413	123.8	1126.51
123.8	338.385	123.9	485.383	123.9	682.074	124	910.28	123.9	1126.34
123.9	338.288	124	485.27	124	681.964	124.1	910.147	124	1126.17
124	338.186	124.1	485.159	124.1	681.859	124.2	910.008	124.1	1126
124.1	338.094	124.2	485.051	124.2	681.752	124.3	909.869	124.2	1125.83
124.2	337.997	124.3	484.945	124.3	681.649	124.4	909.735	124.3	1125.66
124.3	337.902	124.4	484.837	124.4	681.545	124.5	909.603	124.4	1125.49
124.4	337.813	124.5	484.731	124.5	681.442	124.6	909.465	124.5	1125.32
124.5	337.719	124.6	484.619	124.6	681.34	124.7	909.329	124.6	1125.15
124.6	337.62	124.7	484.507	124.7	681.238	124.8	909.199	124.7	1124.97
124.7	337.52	124.8	484.399	124.8	681.134	124.9	909.071	124.8	1124.8
124.8	337.42	124.9	484.294	124.9	681.027	125	908.943	124.9	1124.62
124.9	337.322	125	484.194	125	680.924	125.1	908.815	125	1124.46
125	337.229	125.1	484.091	125.1	680.815	125.2	908.682	125.1	1124.29
125.1	337.133	125.2	483.983	125.2	680.707	125.3	908.551	125.2	1124.12
125.2	337.036	125.3	483.873	125.3	680.601	125.4	908.423	125.3	1123.96
125.3	336.943	125.4	483.768	125.4	680.498	125.5	908.294	125.4	1123.8
125.4	336.853	125.5	483.656	125.5	680.391	125.6	908.164	125.5	1123.64
125.5	336.759	125.6	483.544	125.6	680.288	125.7	908.032	125.6	1123.47
125.6	336.664	125.7	483.433	125.7	680.181	125.8	907.906	125.7	1123.3
125.7	336.572	125.8	483.324	125.8	680.08	125.9	907.783	125.8	1123.14
125.8	336.478	125.9	483.217	125.9	679.98	126	907.659	125.9	1122.97
125.9	336.392	126	483.108	126	679.88	126.1	907.533	126	1122.81
126	336.304	126.1	483.004	126.1	679.779	126.2	907.41	126.1	1122.64
126.1	336.213	126.2	482.895	126.2	679.67	126.3	907.288	126.2	1122.47
126.2	336.121	126.3	482.781	126.3	679.565	126.4	907.161	126.3	1122.3
126.3	336.026	126.4	482.671	126.4	679.462	126.5	907.036	126.4	1122.13
126.4	335.932	126.5	482.565	126.5	679.364	126.6	906.907	126.5	1121.97
126.5	335.841	126.6	482.458	126.6	679.267	126.7	906.789	126.6	1121.81
126.6	335.75	126.7	482.355	126.7	679.164	126.8	906.67	126.7	1121.64
126.7	335.657	126.8	482.255	126.8	679.062	126.9	906.546	126.8	1121.48
126.8	335.563	126.9	482.147	126.9	678.962	127	906.43	126.9	1121.3
126.9	335.469	127	482.046	127	678.864	127.1	906.302	127	1121.13
127	335.381	127.1	481.942	127.1	678.761	127.2	906.179	127.1	1120.96
127.1	335.291	127.2	481.84	127.2	678.661	127.3	906.05	127.2	1120.79
127.2	335.201	127.3	481.734	127.3	678.554	127.4	905.924	127.3	1120.62
127.3	335.104	127.4	481.633	127.4	678.452	127.5	905.797	127.4	1120.45
127.4	335.014	127.5	481.532	127.5	678.348	127.6	905.673	127.5	1120.3
127.5	334.924	127.6	481.429	127.6	678.251	127.7	905.548	127.6	1120.14
127.6	334.834	127.7	481.326	127.7	678.147	127.8	905.417	127.7	1119.98
127.7	334.74	127.8	481.218	127.8	678.039	127.9	905.289	127.8	1119.83
127.8	334.649	127.9	481.111	127.9	677.938	128	905.164	127.9	1119.67
127.9	334.561	128	481.012	128	677.842	128.1	905.037	128	1119.51
128	334.473	128.1	480.91	128.1	677.744	128.2	904.913	128.1	1119.35
128.1	334.383	128.2	480.807	128.2	677.648	128.3	904.788	128.2	1119.19
128.2	334.295	128.3	480.702	128.3	677.549	128.4	904.662	128.3	1119.03
128.3	334.207	128.4	480.599	128.4	677.456	128.5	904.538	128.4	1118.87
128.4	334.116	128.5	480.497	128.5	677.359	128.6	904.414	128.5	1118.72
128.5	334.024	128.6	480.393	128.6	677.258	128.7	904.286	128.6	1118.55
128.6	333.932	128.7	480.294	128.7	677.158	128.8	904.156	128.7	1118.39
128.7	333.845	128.8	480.195	128.8	677.063	128.9	904.038	128.8	1118.23
128.8	333.754	128.9	480.098	128.9	676.966	129	903.922	128.9	1118.08
128.9	333.673	129	480.001	129	676.872	129.1	903.803	129	1117.93
129	333.586	129.1	479.904	129.1	676.773	129.2	903.679	129.1	1117.78
129.1	333.494	129.2	479.803	129.2	676.675	129.3	903.553	129.2	1117.62
129.2	333.409	129.3	479.702	129.3	676.577	129.4	903.432	129.3	1117.47
129.3	333.325	129.4	479.608	129.4	676.482	129.5	903.316	129.4	1117.31
129.4	333.243	129.5	479.514	129.5	676.39	129.6	903.196	129.5	1117.15
129.5	333.155	129.6	479.414	129.6	676.296	129.7	903.073	129.6	1116.99
129.6	333.069	129.7	479.31	129.7	676.198	129.8	902.957	129.7	1116.83
129.7	332.978	129.8	479.209	129.8	676.103	129.9	902.837	129.8	1116.67
129.8	332.889	129.9	479.112	129.9	676.012	130	902.724	129.9	1116.52
129.9	332.803	130	479.012	130	675.921	130.1	902.602	130	1116.37
130	332.715	130.1	478.91	130.1	675.823	130.2	902.487	130.1	1116.2
130.1	332.626	130.2	478.81	130.2	675.729	130.3	902.374	130.2	1116.05
130.2	332.541	130.3	478.711	130.3	675.633	130.4	902.258	130.3	1115.89
130.3	332.459	130.4	478.607	130.4	675.536	130.5	902.143	130.4	1115.74
130.4	332.376	130.5	478.504	130.5	675.44	130.6	902.022	130.5	1115.58
130.5	332.289	130.6	478.403	130.6	675.343	130.7	901.903	130.6	1115.43
130.6	332.202	130.7	478.303	130.7	675.25	130.8	901.781	130.7	1115.28
130.7	332.117	130.8	478.204	130.8	675.154	130.9	901.661	130.8	1115.13
130.8	332.033	130.9	478.106	130.9	675.056	131	901.539	130.9	1114.97
130.9	331.946	131	478.003	131	674.958	131.1	901.412	131	1114.81
131	331.858	131.1	477.901	131.1	674.861	131.2	901.289	131.1	1114.64
131.1	331.769	131.2	477.805	131.2	674.767	131.3	901.174	131.2	1114.49
131.2	331.685	131.3	477.71	131.3	674.674	131.4	901.055	131.3	1114.34
131.3	331.606	131.4	477.615	131.4	674.581	131.5	900.933	131.4	1114.19
131.4	331.524	131.5	477.516	131.5	674.484	131.6	900.808	131.5	1114.04
131.5	331.44	131.6	477.418	131.6	674.389	131.7	900.692	131.6	1113.89
131.6	331.355	131.7	477.329	131.7	674.298	131.8	900.577	131.7	1113.75
131.7	331.272	131.8	477.236	131.8	674.206	131.9	900.456	131.8	1113.6
131.8	331.19	131.9	477.144	131.9	674.111	132	900.343	131.9	1113.45
131.9	331.106	132	477.052	132	674.018	132.1	900.225	132	1113.3
132	331.025	132.1	476.956	132.1	673.924	132.2	900.109	132.1	1113.15
132.1	330.946	132.2	476.86	132.2	673.829	132.3	899.996	132.2	1113
132.2	330.864	132.3	476.767	132.3	673.737	132.4	899.874	132.3	1112.85
132.3	330.784	132.4	476.667	132.4	673.64	132.5	899.754	132.4	1112.69
132.4	330.704	132.5	476.572	132.5	673.548	132.6	899.634	132.5	1112.54
132.5	330.624	132.6	476.479	132.6	673.454	132.7	899.511	132.6	1112.39
132.6	330.545	132.7	476.384	132.7	673.356	132.8	899.382	132.7	1112.23
132.7	330.458	132.8	476.281	132.8	673.26	132.9	899.263	132.8	1112.08
132.8	330.367	132.9	476.181	132.9	673.166	133	899.146	132.9	1111.93
132.9	330.28	133	476.087	133	673.073	133.1	899.025	133	1111.78
133	330.199	133.1	475.991	133.1	672.979	133.2	898.904	133.1	1111.63
133.1	330.115	133.2	475.896	133.2	672.886	133.3	898.79	133.2	1111.48
133.2	330.029	133.3	475.807	133.3	672.792	133.4	898.674	133.3	1111.33
133.3	329.952	133.4	475.722	133.4	672.696	133.5	898.559	133.4	1111.18
133.4	329.871	133.5	475.625	133.5	672.597	133.6	898.442	133.5	1111.03
133.5	329.79	133.6	475.529	133.6	672.502	133.7	898.324	133.6	1110.87
133.6	329.71	133.7	475.434	133.7	672.405	133.8	898.21	133.7	1110.73
133.7	329.632	133.8	475.343	133.8	672.315	133.9	898.095	133.8	1110.58
133.8	329.554	133.9	475.252	133.9	672.227	134	897.981	133.9	1110.43
133.9	329.473	134	475.159	134	672.136	134.1	897.869	134	1110.28
134	329.394	134.1	475.065	134.1	672.042	134.2	897.757	134.1	1110.13
134.1	329.315	134.2	474.972	134.2	671.948	134.3	897.648	134.2	1109.98
134.2	329.235	134.3	474.885	134.3	671.854	134.4	897.542	134.3	1109.84
134.3	329.159	134.4	474.792	134.4	671.763	134.5	897.429	134.4	1109.7
134.4	329.082	134.5	474.701	134.5	671.672	134.6	897.316	134.5	1109.55
134.5	329.004	134.6	474.611	134.6	671.584	134.7	897.196	134.6	1109.41
134.6	328.925	134.7	474.524	134.7	671.496	134.8	897.08	134.7	1109.26
134.7	328.848	134.8	474.432	134.8	671.409	134.9	896.967	134.8	1109.11
134.8	328.771	134.9	474.339	134.9	671.323	135	896.857	134.9	1108.97
134.9	328.692	135	474.246	135	671.231	135.1	896.744	135	1108.82
135	328.608	135.1	474.156	135.1	671.14	135.2	896.632	135.1	1108.68
135.1	328.524	135.2	474.065	135.2	671.053	135.3	896.521	135.2	1108.53
135.2	328.443	135.3	473.976	135.3	670.964	135.4	896.408	135.3	1108.38
135.3	328.361	135.4	473.881	135.4	670.871	135.5	896.296	135.4	1108.23
135.4	328.281	135.5	473.783	135.5	670.776	135.6	896.183	135.5	1108.08
135.5	328.196	135.6	473.691	135.6	670.681	135.7	896.069	135.6	1107.93
135.6	328.118	135.7	473.605	135.7	670.591	135.8	895.951	135.7	1107.78
135.7	328.042	135.8	473.516	135.8	670.503	135.9	895.832	135.8	1107.64
135.8	327.967	135.9	473.423	135.9	670.411	136	895.717	135.9	1107.49
135.9	327.888	136	473.333	136	670.323	136.1	895.606	136	1107.34
136	327.809	136.1	473.248	136.1	670.233	136.2	895.498	136.1	1107.19
136.1	327.726	136.2	473.163	136.2	670.146	136.3	895.382	136.2	1107.05
136.2	327.648	136.3	473.072	136.3	670.056	136.4	895.272	136.3	1106.91
136.3	327.568	136.4	472.983	136.4	669.968	136.5	895.16	136.4	1106.76
136.4	327.492	136.5	472.896	136.5	669.881	136.6	895.044	136.5	1106.62
136.5	327.42	136.6	472.809	136.6	669.791	136.7	894.938	136.6	1106.47
136.6	327.346	136.7	472.72	136.7	669.703	136.8	894.828	136.7	1106.33
136.7	327.27	136.8	472.629	136.8	669.617	136.9	894.714	136.8	1106.19
136.8	327.196	136.9	472.538	136.9	669.531	137	894.6	136.9	1106.05
136.9	327.124	137	472.454	137	669.447	137.1	894.488	137	1105.91
137	327.049	137.1	472.374	137.1	669.364	137.2	894.374	137.1	1105.78
137.1	326.975	137.2	472.286	137.2	669.274	137.3	894.265	137.2	1105.64
137.2	326.897	137.3	472.196	137.3	669.188	137.4	894.15	137.3	1105.49
137.3	326.821	137.4	472.106	137.4	669.102	137.5	894.046	137.4	1105.35
137.4	326.746	137.5	472.017	137.5	669.016	137.6	893.942	137.5	1105.21
137.5	326.671	137.6	471.932	137.6	668.928	137.7	893.832	137.6	1105.07
137.6	326.595	137.7	471.849	137.7	668.849	137.8	893.713	137.7	1104.93
137.7	326.521	137.8	471.762	137.8	668.766	137.9	893.596	137.8	1104.79
137.8	326.443	137.9	471.673	137.9	668.68	138	893.482	137.9	1104.65
137.9	326.364	138	471.584	138	668.593	138.1	893.364	138	1104.51
138	326.288	138.1	471.498	138.1	668.509	138.2	893.25	138.1	1104.37
138.1	326.212	138.2	471.409	138.2	668.425	138.3	893.139	138.2	1104.22
138.2	326.137	138.3	471.321	138.3	668.341	138.4	893.035	138.3	1104.08
138.3	326.06	138.4	471.231	138.4	668.252	138.5	892.927	138.4	1103.94
138.4	325.981	138.5	471.148	138.5	668.17	138.6	892.823	138.5	1103.81
138.5	325.911	138.6	471.059	138.6	668.087	138.7	892.721	138.6	1103.68
138.6	325.835	138.7	470.973	138.7	668.004	138.8	892.615	138.7	1103.54
138.7	325.76	138.8	470.892	138.8	667.922	138.9	892.503	138.8	1103.4
138.8	325.688	138.9	470.808	138.9	667.836	139	892.39	138.9	1103.26
138.9	325.616	139	470.722	139	667.748	139.1	892.284	139	1103.12
139	325.542	139.1	470.637	139.1	667.661	139.2	892.174	139.1	1102.98
139.1	325.465	139.2	470.549	139.2	667.574	139.3	892.067	139.2	1102.84
139.2	325.392	139.3	470.462	139.3	667.488	139.4	891.955	139.3	1102.7
139.3	325.32	139.4	470.375	139.4	667.402	139.5	891.849	139.4	1102.56
139.4	325.243	139.5	470.29	139.5	667.319	139.6	891.74	139.5	1102.41
139.5	325.174	139.6	470.206	139.6	667.232	139.7	891.637	139.6	1102.28
139.6	325.102	139.7	470.124	139.7	667.149	139.8	891.533	139.7	1102.14
139.7	325.032	139.8	470.041	139.8	667.067	139.9	891.427	139.8	1102
139.8	324.959	139.9	469.956	139.9	666.981	140	891.317	139.9	1101.87
139.9	324.884	140	469.869	140	666.9	140.1	891.205	140	1101.72
140	324.813	140.1	469.785	140.1	666.819	140.2	891.09	140.1	1101.58
140.1	324.741	140.2	469.7	140.2	666.732	140.3	890.985	140.2	1101.44
140.2	324.664	140.3	469.618	140.3	666.651	140.4	890.878	140.3	1101.31
140.3	324.59	140.4	469.539	140.4	666.574	140.5	890.764	140.4	1101.17
140.4	324.515	140.5	469.455	140.5	666.49	140.6	890.654	140.5	1101.03
140.5	324.439	140.6	469.372	140.6	666.405	140.7	890.546	140.6	1100.9
140.6	324.367	140.7	469.286	140.7	666.32	140.8	890.442	140.7	1100.76
140.7	324.294	140.8	469.2	140.8	666.235	140.9	890.339	140.8	1100.62
140.8	324.224	140.9	469.12	140.9	666.153	141	890.235	140.9	1100.49
140.9	324.152	141	469.038	141	666.062	141.1	890.129	141	1100.35
141	324.076	141.1	468.955	141.1	665.974	141.2	890.022	141.1	1100.22
141.1	324.004	141.2	468.873	141.2	665.885	141.3	889.915	141.2	1100.08
141.2	323.932	141.3	468.791	141.3	665.804	141.4	889.808	141.3	1099.94
141.3	323.86	141.4	468.703	141.4	665.72	141.5	889.701	141.4	1099.8
141.4	323.79	141.5	468.621	141.5	665.637	141.6	889.592	141.5	1099.67
141.5	323.717	141.6	468.541	141.6	665.553	141.7	889.487	141.6	1099.54
141.6	323.646	141.7	468.462	141.7	665.473	141.8	889.386	141.7	1099.41
141.7	323.575	141.8	468.382	141.8	665.392	141.9	889.281	141.8	1099.27
141.8	323.503	141.9	468.298	141.9	665.308	142	889.181	141.9	1099.13
141.9	323.426	142	468.217	142	665.236	142.1	889.078	142	1099
142	323.359	142.1	468.14	142.1	665.171	142.2	888.977	142.1	1098.87
142.1	323.29	142.2	468.06	142.2	665.098	142.3	888.873	142.2	1098.74
142.2	323.22	142.3	467.979	142.3	665.02	142.4	888.768	142.3	1098.6
142.3	323.153	142.4	467.897	142.4	664.946	142.5	888.662	142.4	1098.47
142.4	323.084	142.5	467.819	142.5	664.867	142.6	888.555	142.5	1098.34
142.5	323.013	142.6	467.736	142.6	664.786	142.7	888.45	142.6	1098.2
142.6	322.943	142.7	467.651	142.7	664.707	142.8	888.341	142.7	1098.07
142.7	322.873	142.8	467.567	142.8	664.634	142.9	888.23	142.8	1097.93
142.8	322.803	142.9	467.488	142.9	664.556	143	888.12	142.9	1097.8
142.9	322.732	143	467.404	143	664.485	143.1	888.017	143	1097.67
143	322.658	143.1	467.324	143.1	664.417	143.2	887.914	143.1	1097.53
143.1	322.591	143.2	467.248	143.2	664.343	143.3	887.814	143.2	1097.4
143.2	322.521	143.3	467.168	143.3	664.267	143.4	887.712	143.3	1097.27
143.3	322.456	143.4	467.09	143.4	664.191	143.5	887.61	143.4	1097.14
143.4	322.393	143.5	467.015	143.5	664.111	143.6	887.507	143.5	1097.01
143.5	322.323	143.6	466.938	143.6	664.034	143.7	887.4	143.6	1096.88
143.6	322.252	143.7	466.858	143.7	663.955	143.8	887.295	143.7	1096.75
143.7	322.186	143.8	466.779	143.8	663.871	143.9	887.189	143.8	1096.61
143.8	322.111	143.9	466.7	143.9	663.786	144	887.08	143.9	1096.48
143.9	322.04	144	466.622	144	663.705	144.1	886.977	144	1096.35
144	321.97	144.1	466.546	144.1	663.622	144.2	886.873	144.1	1096.22
144.1	321.904	144.2	466.47	144.2	663.539	144.3	886.766	144.2	1096.09
144.2	321.835	144.3	466.392	144.3	663.455	144.4	886.656	144.3	1095.96
144.3	321.762	144.4	466.31	144.4	663.371	144.5	886.55	144.4	1095.83
144.4	321.693	144.5	466.231	144.5	663.292	144.6	886.447	144.5	1095.7
144.5	321.623	144.6	466.149	144.6	663.205	144.7	886.348	144.6	1095.56
144.6	321.548	144.7	466.069	144.7	663.121	144.8	886.241	144.7	1095.43
144.7	321.482	144.8	465.988	144.8	663.038	144.9	886.14	144.8	1095.3
144.8	321.411	144.9	465.911	144.9	662.96	145	886.039	144.9	1095.16
144.9	321.341	145	465.832	145	662.881	145.1	885.936	145	1095.03
145	321.271	145.1	465.755	145.1	662.802	145.2	885.835	145.1	1094.9
145.1	321.204	145.2	465.679	145.2	662.724	145.3	885.732	145.2	1094.77
145.2	321.139	145.3	465.605	145.3	662.644	145.4	885.634	145.3	1094.64
145.3	321.07	145.4	465.53	145.4	662.569	145.5	885.536	145.4	1094.51
145.4	321.005	145.5	465.452	145.5	662.491	145.6	885.433	145.5	1094.37
145.5	320.938	145.6	465.377	145.6	662.41	145.7	885.33	145.6	1094.24
145.6	320.874	145.7	465.298	145.7	662.324	145.8	885.227	145.7	1094.11
145.7	320.806	145.8	465.219	145.8	662.234	145.9	885.125	145.8	1093.99
145.8	320.738	145.9	465.143	145.9	662.147	146	885.022	145.9	1093.86
145.9	320.669	146	465.067	146	662.063	146.1	884.922	146	1093.73
146	320.6	146.1	464.993	146.1	661.981	146.2	884.824	146.1	1093.6
146.1	320.532	146.2	464.916	146.2	661.896	146.3	884.727	146.2	1093.47
146.2	320.466	146.3	464.839	146.3	661.813	146.4	884.627	146.3	1093.35
146.3	320.402	146.4	464.762	146.4	661.727	146.5	884.525	146.4	1093.22
146.4	320.336	146.5	464.682	146.5	661.644	146.6	884.425	146.5	1093.08
146.5	320.268	146.6	464.606	146.6	661.563	146.7	884.326	146.6	1092.95
146.6	320.199	146.7	464.527	146.7	661.485	146.8	884.225	146.7	1092.82
146.7	320.134	146.8	464.446	146.8	661.41	146.9	884.121	146.8	1092.7
146.8	320.069	146.9	464.363	146.9	661.334	147	884.019	146.9	1092.57
146.9	319.999	147	464.285	147	661.257	147.1	883.921	147	1092.44
147	319.935	147.1	464.211	147.1	661.184	147.2	883.827	147.1	1092.31
147.1	319.872	147.2	464.137	147.2	661.109	147.3	883.731	147.2	1092.19
147.2	319.808	147.3	464.066	147.3	661.033	147.4	883.637	147.3	1092.06
147.3	319.744	147.4	463.99	147.4	660.956	147.5	883.539	147.4	1091.94
147.4	319.682	147.5	463.915	147.5	660.878	147.6	883.442	147.5	1091.82
147.5	319.619	147.6	463.837	147.6	660.8	147.7	883.342	147.6	1091.69
147.6	319.556	147.7	463.759	147.7	660.721	147.8	883.241	147.7	1091.57
147.7	319.491	147.8	463.687	147.8	660.648	147.9	883.136	147.8	1091.45
147.8	319.433	147.9	463.614	147.9	660.569	148	883.035	147.9	1091.32
147.9	319.372	148	463.54	148	660.491	148.1	882.932	148	1091.21
148	319.309	148.1	463.465	148.1	660.413	148.2	882.829	148.1	1091.09
148.1	319.241	148.2	463.383	148.2	660.331	148.3	882.732	148.2	1090.96
148.2	319.175	148.3	463.304	148.3	660.251	148.4	882.637	148.3	1090.83
148.3	319.115	148.4	463.232	148.4	660.173	148.5	882.538	148.4	1090.71
148.4	319.05	148.5	463.155	148.5	660.094	148.6	882.442	148.5	1090.59
148.5	318.985	148.6	463.076	148.6	660.018	148.7	882.348	148.6	1090.47
148.6	318.925	148.7	463	148.7	659.946	148.8	882.254	148.7	1090.35
148.7	318.865	148.8	462.924	148.8	659.87	148.9	882.154	148.8	1090.23
148.8	318.805	148.9	462.854	148.9	659.795	149	882.049	148.9	1090.1
148.9	318.74	149	462.777	149	659.718	149.1	881.95	149	1089.98
149	318.676	149.1	462.701	149.1	659.64	149.2	881.857	149.1	1089.86
149.1	318.611	149.2	462.626	149.2	659.564	149.3	881.761	149.2	1089.74
149.2	318.548	149.3	462.552	149.3	659.484	149.4	881.668	149.3	1089.62
149.3	318.481	149.4	462.48	149.4	659.411	149.5	881.571	149.4	1089.5
149.4	318.418	149.5	462.41	149.5	659.336	149.6	881.468	149.5	1089.38
149.5	318.355	149.6	462.338	149.6	659.262	149.7	881.371	149.6	1089.26
149.6	318.291	149.7	462.263	149.7	659.181	149.8	881.276	149.7	1089.13
149.7	318.227	149.8	462.191	149.8	659.099	149.9	881.177	149.8	1089
149.8	318.161	149.9	462.117	149.9	659.024	150	881.084	149.9	1088.87
149.9	318.1	150	462.042	150	658.95	150.1	880.992	150	1088.75
150	318.038	150.1	461.969	150.1	658.876	150.2	880.891	150.1	1088.62
150.1	317.975	150.2	461.892	150.2	658.804	150.3	880.796	150.2	1088.5
150.2	317.909	150.3	461.819	150.3	658.731	150.4	880.703	150.3	1088.37
150.3	317.849	150.4	461.746	150.4	658.658	150.5	880.605	150.4	1088.25
150.4	317.787	150.5	461.675	150.5	658.586	150.6	880.504	150.5	1088.13
150.5	317.724	150.6	461.599	150.6	658.507	150.7	880.406	150.6	1088
150.6	317.662	150.7	461.525	150.7	658.43	150.8	880.312	150.7	1087.88
150.7	317.604	150.8	461.457	150.8	658.354	150.9	880.223	150.8	1087.76
150.8	317.542	150.9	461.389	150.9	658.283	151	880.129	150.9	1087.64
150.9	317.482	151	461.319	151	658.209	151.1	880.036	151	1087.52
151	317.419	151.1	461.246	151.1	658.133	151.2	879.94	151.1	1087.4
151.1	317.359	151.2	461.171	151.2	658.056	151.3	879.849	151.2	1087.28
151.2	317.293	151.3	461.099	151.3	657.981	151.4	879.759	151.3	1087.15
151.3	317.235	151.4	461.023	151.4	657.907	151.5	879.661	151.4	1087.03
151.4	317.176	151.5	460.943	151.5	657.829	151.6	879.56	151.5	1086.9
151.5	317.107	151.6	460.87	151.6	657.753	151.7	879.463	151.6	1086.78
151.6	317.044	151.7	460.795	151.7	657.674	151.8	879.371	151.7	1086.65
151.7	316.976	151.8	460.724	151.8	657.606	151.9	879.275	151.8	1086.53
151.8	316.918	151.9	460.653	151.9	657.533	152	879.173	151.9	1086.41
151.9	316.855	152	460.584	152	657.463	152.1	879.075	152	1086.29
152	316.791	152.1	460.512	152.1	657.394	152.2	878.985	152.1	1086.17
152.1	316.729	152.2	460.442	152.2	657.328	152.3	878.894	152.2	1086.05
152.2	316.672	152.3	460.372	152.3	657.26	152.4	878.797	152.3	1085.92
152.3	316.608	152.4	460.304	152.4	657.192	152.5	878.702	152.4	1085.8
152.4	316.549	152.5	460.229	152.5	657.124	152.6	878.605	152.5	1085.69
152.5	316.49	152.6	460.156	152.6	657.052	152.7	878.509	152.6	1085.57
152.6	316.429	152.7	460.084	152.7	656.978	152.8	878.412	152.7	1085.45
152.7	316.372	152.8	460.015	152.8	656.905	152.9	878.317	152.8	1085.33
152.8	316.308	152.9	459.949	152.9	656.831	153	878.227	152.9	1085.21
152.9	316.246	153	459.883	153	656.762	153.1	878.132	153	1085.1
153	316.189	153.1	459.818	153.1	656.686	153.2	878.039	153.1	1084.99
153.1	316.127	153.2	459.746	153.2	656.615	153.3	877.947	153.2	1084.88
153.2	316.068	153.3	459.674	153.3	656.542	153.4	877.851	153.3	1084.76
153.3	316.009	153.4	459.604	153.4	656.472	153.5	877.756	153.4	1084.64
153.4	315.947	153.5	459.536	153.5	656.396	153.6	877.658	153.5	1084.52
153.5	315.884	153.6	459.462	153.6	656.316	153.7	877.559	153.6	1084.4
153.6	315.817	153.7	459.387	153.7	656.244	153.8	877.468	153.7	1084.29
153.7	315.753	153.8	459.321	153.8	656.177	153.9	877.372	153.8	1084.17
153.8	315.696	153.9	459.25	153.9	656.102	154	877.282	153.9	1084.05
153.9	315.636	154	459.178	154	656.028	154.1	877.191	154	1083.93
154	315.573	154.1	459.111	154.1	655.955	154.2	877.097	154.1	1083.82
154.1	315.514	154.2	459.042	154.2	655.883	154.3	877.003	154.2	1083.7
154.2	315.456	154.3	458.971	154.3	655.816	154.4	876.908	154.3	1083.58
154.3	315.396	154.4	458.9	154.4	655.746	154.5	876.817	154.4	1083.46
154.4	315.333	154.5	458.826	154.5	655.674	154.6	876.724	154.5	1083.35
154.5	315.274	154.6	458.757	154.6	655.6	154.7	876.631	154.6	1083.23
154.6	315.216	154.7	458.691	154.7	655.529	154.8	876.54	154.7	1083.11
154.7	315.154	154.8	458.623	154.8	655.457	154.9	876.449	154.8	1083
154.8	315.092	154.9	458.554	154.9	655.388	155	876.362	154.9	1082.88
154.9	315.031	155	458.484	155	655.318	155.1	876.277	155	1082.77
155	314.968	155.1	458.419	155.1	655.249	155.2	876.187	155.1	1082.66
155.1	314.91	155.2	458.351	155.2	655.181	155.3	876.092	155.2	1082.55
155.2	314.85	155.3	458.279	155.3	655.111	155.4	876.001	155.3	1082.43
155.3	314.785	155.4	458.211	155.4	655.041	155.5	875.91	155.4	1082.32
155.4	314.725	155.5	458.144	155.5	654.973	155.6	875.813	155.5	1082.2
155.5	314.671	155.6	458.075	155.6	654.9	155.7	875.721	155.6	1082.09
155.6	314.609	155.7	458.009	155.7	654.829	155.8	875.628	155.7	1081.97
155.7	314.551	155.8	457.943	155.8	654.755	155.9	875.534	155.8	1081.86
155.8	314.488	155.9	457.875	155.9	654.677	156	875.441	155.9	1081.74
155.9	314.425	156	457.809	156	654.606	156.1	875.347	156	1081.62
156	314.36	156.1	457.739	156.1	654.537	156.2	875.25	156.1	1081.5
156.1	314.302	156.2	457.67	156.2	654.466	156.3	875.163	156.2	1081.39
156.2	314.243	156.3	457.605	156.3	654.398	156.4	875.074	156.3	1081.28
156.3	314.188	156.4	457.54	156.4	654.324	156.5	874.982	156.4	1081.16
156.4	314.128	156.5	457.476	156.5	654.25	156.6	874.892	156.5	1081.05
156.5	314.07	156.6	457.41	156.6	654.177	156.7	874.805	156.6	1080.93
156.6	314.013	156.7	457.346	156.7	654.105	156.8	874.718	156.7	1080.82
156.7	313.96	156.8	457.281	156.8	654.036	156.9	874.624	156.8	1080.71
156.8	313.903	156.9	457.212	156.9	653.968	157	874.53	156.9	1080.59
156.9	313.844	157	457.143	157	653.899	157.1	874.435	157	1080.47
157	313.785	157.1	457.071	157.1	653.826	157.2	874.344	157.1	1080.36
157.1	313.727	157.2	457.008	157.2	653.756	157.3	874.253	157.2	1080.25
157.2	313.669	157.3	456.941	157.3	653.687	157.4	874.154	157.3	1080.14
157.3	313.612	157.4	456.869	157.4	653.615	157.5	874.059	157.4	1080.02
157.4	313.545	157.5	456.8	157.5	653.543	157.6	873.97	157.5	1079.91
157.5	313.487	157.6	456.738	157.6	653.476	157.7	873.881	157.6	1079.8
157.6	313.433	157.7	456.674	157.7	653.403	157.8	873.79	157.7	1079.69
157.7	313.379	157.8	456.609	157.8	653.341	157.9	873.696	157.8	1079.58
157.8	313.327	157.9	456.537	157.9	653.272	158	873.6	157.9	1079.46
157.9	313.264	158	456.47	158	653.204	158.1	873.507	158	1079.35
158	313.201	158.1	456.404	158.1	653.129	158.2	873.417	158.1	1079.23
158.1	313.14	158.2	456.337	158.2	653.058	158.3	873.321	158.2	1079.12
158.2	313.082	158.3	456.268	158.3	652.991	158.4	873.229	158.3	1079.01
158.3	313.018	158.4	456.206	158.4	652.92	158.5	873.142	158.4	1078.9
158.4	312.964	158.5	456.14	158.5	652.845	158.6	873.052	158.5	1078.78
158.5	312.904	158.6	456.077	158.6	652.773	158.7	872.969	158.6	1078.67
158.6	312.849	158.7	456.019	158.7	652.704	158.8	872.88	158.7	1078.56
158.7	312.798	158.8	455.958	158.8	652.632	158.9	872.796	158.8	1078.45
158.8	312.743	158.9	455.899	158.9	652.565	159	872.709	158.9	1078.34
158.9	312.688	159	455.84	159	652.498	159.1	872.622	159	1078.23
159	312.632	159.1	455.776	159.1	652.431	159.2	872.536	159.1	1078.12
159.1	312.572	159.2	455.71	159.2	652.367	159.3	872.448	159.2	1078.01
159.2	312.517	159.3	455.648	159.3	652.301	159.4	872.357	159.3	1077.9
159.3	312.46	159.4	455.583	159.4	652.233	159.5	872.273	159.4	1077.79
159.4	312.407	159.5	455.518	159.5	652.166	159.6	872.183	159.5	1077.68
159.5	312.353	159.6	455.452	159.6	652.101	159.7	872.097	159.6	1077.57
159.6	312.299	159.7	455.39	159.7	652.039	159.8	872.007	159.7	1077.47
159.7	312.247	159.8	455.327	159.8	651.975	159.9	871.918	159.8	1077.36
159.8	312.196	159.9	455.259	159.9	651.903	160	871.83	159.9	1077.25
159.9	312.139	160	455.189	160	651.835	160.1	871.745	160	1077.14
160	312.08	160.1	455.122	160.1	651.769	160.2	871.658	160.1	1077.03
160.1	312.027	160.2	455.056	160.2	651.701	160.3	871.571	160.2	1076.91
160.2	311.969	160.3	454.994	160.3	651.637	160.4	871.482	160.3	1076.81
160.3	311.915	160.4	454.929	160.4	651.57	160.5	871.393	160.4	1076.7
160.4	311.862	160.5	454.865	160.5	651.507	160.6	871.301	160.5	1076.59
160.5	311.809	160.6	454.804	160.6	651.438	160.7	871.215	160.6	1076.48
160.6	311.758	160.7	454.742	160.7	651.375	160.8	871.13	160.7	1076.37
160.7	311.705	160.8	454.674	160.8	651.308	160.9	871.046	160.8	1076.26
160.8	311.653	160.9	454.613	160.9	651.245	161	870.959	160.9	1076.16
160.9	311.601	161	454.552	161	651.182	161.1	870.867	161	1076.05
161	311.546	161.1	454.491	161.1	651.118	161.2	870.779	161.1	1075.95
161.1	311.489	161.2	454.43	161.2	651.051	161.3	870.695	161.2	1075.84
161.2	311.431	161.3	454.367	161.3	650.987	161.4	870.61	161.3	1075.73
161.3	311.38	161.4	454.306	161.4	650.918	161.5	870.528	161.4	1075.62
161.4	311.324	161.5	454.245	161.5	650.853	161.6	870.441	161.5	1075.51
161.5	311.271	161.6	454.182	161.6	650.781	161.7	870.355	161.6	1075.4
161.6	311.215	161.7	454.118	161.7	650.714	161.8	870.271	161.7	1075.29
161.7	311.166	161.8	454.057	161.8	650.649	161.9	870.186	161.8	1075.17
161.8	311.11	161.9	453.998	161.9	650.588	162	870.101	161.9	1075.07
161.9	311.059	162	453.937	162	650.526	162.1	870.017	162	1074.96
162	311.011	162.1	453.875	162.1	650.463	162.2	869.932	162.1	1074.85
162.1	310.961	162.2	453.816	162.2	650.399	162.3	869.842	162.2	1074.75
162.2	310.906	162.3	453.757	162.3	650.33	162.4	869.753	162.3	1074.65
162.3	310.853	162.4	453.694	162.4	650.262	162.5	869.665	162.4	1074.54
162.4	310.799	162.5	453.629	162.5	650.198	162.6	869.578	162.5	1074.43
162.5	310.744	162.6	453.562	162.6	650.128	162.7	869.49	162.6	1074.32
162.6	310.69	162.7	453.494	162.7	650.057	162.8	869.404	162.7	1074.21
162.7	310.632	162.8	453.427	162.8	649.99	162.9	869.318	162.8	1074.1
162.8	310.573	162.9	453.362	162.9	649.927	163	869.233	162.9	1074
162.9	310.519	163	453.296	163	649.861	163.1	869.153	163	1073.89
[truncated: 2,071 more rows]

## Sheet: Sheet3
125 μg/ml (Mmp-aCPSF1)							500 μg/ml (Mmp-aCPSF1)
T0400		T0911		T1406			T0400		T0911		T1406
Run 1; Ch 2; Cy 11; RefSub; conc=125_X	Run 1; Ch 2; Cy 11; RefSub; conc=125_Y	Run 1; Ch 3; Cy 11; RefSub;conc=125_X	Run 1; Ch 3; Cy 11; RefSub; conc=125_Y	Run 1; Ch 4; Cy 11; RefSub; conc=125_X	Run 1; Ch 4; Cy 11; RefSub; conc=125_Y		Run 1; Ch 2; Cy 13; RefSub; conc=500_X	Run 1; Ch 2; Cy 13; RefSub; conc=500_Y	Run 1; Ch 3; Cy 13; RefSub; conc=500_X	Run 1; Ch 3; Cy 13; RefSub; conc=500_Y	Run 1; Ch 4; Cy 13; RefSub; conc=500_X	Run 1; Ch 4; Cy 13; RefSub; conc=500_Y
-36.8	0.192198	-36.8	0.131998	-36.8	0.2432		-36.7	0.1649	-36.7	0.1899	-36.7	0.0503
-36.7	0.2594	-36.7	0.1118	-36.7	0.09		-36.6	0.0782001	-36.6	0.2446	-36.6	0.0616
-36.6	0.203201	-36.6	0.0907999	-36.6	0.0949994		-36.5	0.0549	-36.5	0.2367	-36.5	0.0951
-36.5	0.1798	-36.5	0.0883	-36.5	0.0967		-36.4	0.0758981	-36.4	0.1805	-36.4	0.0897998
-36.4	0.1897	-36.4	0.0719	-36.4	0.0774		-36.3	0.0705	-36.3	0.1524	-36.3	0.0686
-36.3	0.168102	-36.3	0.0308004	-36.3	0.0758002		-36.2	0.0412	-36.2	0.1685	-36.2	0.0640999
-36.2	0.152	-36.2	0.0117	-36.2	0.0473999		-36.1	0.0505	-36.1	0.1403	-36.1	0.0675
-36.1	0.188501	-36.1	0.0102003	-36.1	0.0490002		-36	0.0802	-36	0.1665	-36	0.0931
-36	0.1796	-36	0.0209	-36	0.0512		-35.9	0.0998982	-35.9	0.1732	-35.9	0.0839002
-35.9	0.1589	-35.9	-0.00479999	-35.9	0.0381		-35.8	0.1239	-35.8	0.1559	-35.8	0.0695
-35.8	0.151302	-35.8	0.0116	-35.8	0.0547997		-35.7	0.1402	-35.7	0.1232	-35.7	0.0762
-35.7	0.1479	-35.7	0.000599989	-35.7	0.0644		-35.6	0.1334	-35.6	0.1085	-35.6	0.0574
-35.6	0.112102	-35.6	-0.00529964	-35.6	0.0659008		-35.5	0.1239	-35.5	0.1118	-35.5	0.0388
-35.5	0.1044	-35.5	0.0412	-35.5	0.0805		-35.4	0.118399	-35.4	0.0694995	-35.4	0.0356983
-35.4	0.0974	-35.4	0.0165	-35.4	0.1088		-35.3	0.1292	-35.3	0.0684	-35.3	0.0353
-35.3	0.0885011	-35.3	0.0152006	-35.3	0.0864017		-35.2	0.1461	-35.2	0.0837	-35.2	0.00390001
-35.2	0.1086	-35.2	0.0494	-35.2	0.0753		-35.1	0.1461	-35.1	0.0783	-35.1	0.0211
-35.1	0.119701	-35.1	0.0148009	-35.1	0.0596009		-35	0.1446	-35	0.079	-35	0.00370003
-35	0.1023	-35	0.00880001	-35	0.0168		-34.9	0.1307	-34.9	0.101399	-34.9	0.0119996
-34.9	0.1053	-34.9	0.0421	-34.9	0.0211		-34.8	0.1326	-34.8	0.1014	-34.8	0.0153
-34.8	0.1255	-34.8	0.0361007	-34.8	0.0232004		-34.7	0.1469	-34.7	0.1095	-34.7	0.0197
-34.7	0.1243	-34.7	0.0538	-34.7	0.0349		-34.6	0.1265	-34.6	0.1123	-34.6	-0.00830002
-34.6	0.0952012	-34.6	0.0469002	-34.6	0.0218011		-34.5	0.1236	-34.5	0.1243	-34.5	0.0069
-34.5	0.0895	-34.5	0.075	-34.5	0.0362		-34.4	0.1285	-34.4	0.111999	-34.4	-0.0014995
-34.4	0.0828	-34.4	0.0657	-34.4	0.0375		-34.3	0.1247	-34.3	0.1068	-34.3	0.0283
-34.3	0.0929005	-34.3	0.0657005	-34.3	0.0627995		-34.2	0.1316	-34.2	0.1087	-34.2	0.0225
-34.2	0.0844	-34.2	0.0761	-34.2	0.0574		-34.1	0.1337	-34.1	0.1165	-34.1	0.0283
-34.1	0.0984005	-34.1	0.0805002	-34.1	0.0767001		-34	0.1414	-34	0.1217	-34	0.0165
-34	0.0988	-34	0.0978	-34	0.0702		-33.9	0.1357	-33.9	0.1257	-33.9	0.0273999
-33.9	0.1007	-33.9	0.0917	-33.9	0.0686		-33.8	0.1479	-33.8	0.1154	-33.8	0.0247
-33.8	0.1038	-33.8	0.0957003	-33.8	0.0812002		-33.7	0.158	-33.7	0.1193	-33.7	0.0449
-33.7	0.1027	-33.7	0.0902	-33.7	0.0797		-33.6	0.1536	-33.6	0.1311	-33.6	0.0493
-33.6	0.0913005	-33.6	0.0889001	-33.6	0.0747003		-33.5	0.1546	-33.5	0.1251	-33.5	0.0598
-33.5	0.0892	-33.5	0.092	-33.5	0.078		-33.4	0.1557	-33.4	0.136	-33.4	0.0710994
-33.4	0.0948	-33.4	0.0846	-33.4	0.0829		-33.3	0.1692	-33.3	0.1439	-33.3	0.0651
-33.3	0.0935001	-33.3	0.0844001	-33.3	0.0698006		-33.2	0.1772	-33.2	0.141	-33.2	0.0614
-33.2	0.0823	-33.2	0.0691	-33.2	0.0684		-33.1	0.1853	-33.1	0.1384	-33.1	0.0687
-33.1	0.0827004	-33.1	0.0737998	-33.1	0.0603002		-33	0.1796	-33	0.1358	-33	0.0757
-33	0.0759	-33	0.0675	-33	0.0568		-32.9	0.1845	-32.9	0.1493	-32.9	0.0680995
-32.9	0.0827999	-32.9	0.0751	-32.9	0.0439		-32.8	0.1864	-32.8	0.158	-32.8	0.0684
-32.8	0.0863999	-32.8	0.0815998	-32.8	0.0314005		-32.7	0.1992	-32.7	0.1541	-32.7	0.0597
-32.7	0.0923	-32.7	0.0722	-32.7	0.035		-32.6	0.1957	-32.6	0.1513	-32.6	0.0481
-32.6	0.0914003	-32.6	0.0659	-32.6	0.0264003		-32.5	0.2	-32.5	0.1484	-32.5	0.0518
-32.5	0.0969	-32.5	0.0612	-32.5	0.0291		-32.4	0.2062	-32.4	0.1495	-32.4	0.0552001
-32.4	0.1062	-32.4	0.0606	-32.4	0.0221		-32.3	0.2076	-32.3	0.1511	-32.3	0.0609
-32.3	0.109	-32.3	0.0637999	-32.3	0.0248999		-32.2	0.202	-32.2	0.1589	-32.2	0.057
-32.2	0.1075	-32.2	0.0676	-32.2	0.0214		-32.1	0.1975	-32.1	0.1591	-32.1	0.0638
-32.1	0.109	-32.1	0.0644001	-32.1	0.0288998		-32	0.197	-32	0.162	-32	0.0678
-32	0.1125	-32	0.0633	-32	0.033		-31.9	0.1799	-31.9	0.1689	-31.9	0.0704
-31.9	0.1155	-31.9	0.0665	-31.9	0.0395		-31.8	0.1742	-31.8	0.1658	-31.8	0.073
-31.8	0.111	-31.8	0.0631001	-31.8	0.0493001		-31.7	0.1685	-31.7	0.1634	-31.7	0.0836
-31.7	0.1116	-31.7	0.061	-31.7	0.0578		-31.6	0.1566	-31.6	0.1542	-31.6	0.0924999
-31.6	0.1103	-31.6	0.0612	-31.6	0.0624		-31.5	0.1548	-31.5	0.1534	-31.5	0.0918
-31.5	0.111	-31.5	0.0622	-31.5	0.0597001		-31.4	0.1602	-31.4	0.1523	-31.4	0.0959
-31.4	0.105	-31.4	0.0595	-31.4	0.0651		-31.3	0.151	-31.3	0.1485	-31.3	0.1008
-31.3	0.0999001	-31.3	0.0554	-31.3	0.0596		-31.2	0.1467	-31.2	0.1447	-31.2	0.1057
-31.2	0.0954	-31.2	0.054	-31.2	0.0524		-31.1	0.1422	-31.1	0.1414	-31.1	0.114
-31.1	0.0865002	-31.1	0.0456001	-31.1	0.0531001		-31	0.1429	-31	0.1326	-31	0.1119
-31	0.0837001	-31	0.0414	-31	0.0534001		-30.9	0.1394	-30.9	0.1378	-30.9	0.1133
-30.9	0.0790001	-30.9	0.0502999	-30.9	0.0587		-30.8	0.1407	-30.8	0.1341	-30.8	0.1079
-30.8	0.0760001	-30.8	0.0545999	-30.8	0.0531001		-30.7	0.1395	-30.7	0.1382	-30.7	0.1139
-30.7	0.0747	-30.7	0.0594	-30.7	0.0587		-30.6	0.1393	-30.6	0.1306	-30.6	0.1121
-30.6	0.0767001	-30.6	0.0549	-30.6	0.06		-30.5	0.1358	-30.5	0.1257	-30.5	0.1092
-30.5	0.0760002	-30.5	0.0568001	-30.5	0.0612001		-30.4	0.1428	-30.4	0.1225	-30.4	0.1005
-30.4	0.0808	-30.4	0.0555	-30.4	0.0540002		-30.3	0.1461	-30.3	0.1271	-30.3	0.0923
-30.3	0.0819	-30.3	0.0587999	-30.3	0.0490002		-30.2	0.1519	-30.2	0.1306	-30.2	0.0868
-30.2	0.0863	-30.2	0.0638	-30.2	0.047		-30.1	0.157	-30.1	0.1351	-30.1	0.0921999
-30.1	0.0901	-30.1	0.0710999	-30.1	0.0480001		-30	0.1506	-30	0.1359	-30	0.0915
-30	0.0848001	-30	0.0735	-30	0.0484001		-29.9	0.1521	-29.9	0.1328	-29.9	0.0951
-29.9	0.084	-29.9	0.0745	-29.9	0.0511001		-29.8	0.152	-29.8	0.1372	-29.8	0.0966
-29.8	0.0854	-29.8	0.0798	-29.8	0.0556		-29.7	0.1511	-29.7	0.1376	-29.7	0.0927999
-29.7	0.0884	-29.7	0.0787	-29.7	0.0628		-29.6	0.1535	-29.6	0.1357	-29.6	0.0929
-29.6	0.0910001	-29.6	0.0821	-29.6	0.0621		-29.5	0.1533	-29.5	0.1381	-29.5	0.0893
-29.5	0.0888001	-29.5	0.0824	-29.5	0.0625		-29.4	0.1529	-29.4	0.1364	-29.4	0.0908
-29.4	0.0888001	-29.4	0.0793	-29.4	0.0626		-29.3	0.148	-29.3	0.1371	-29.3	0.0989
-29.3	0.0838001	-29.3	0.0820999	-29.3	0.0641		-29.2	0.1461	-29.2	0.135	-29.2	0.1026
-29.2	0.0778	-29.2	0.0854	-29.2	0.0636		-29.1	0.1442	-29.1	0.1342	-29.1	0.1024
-29.1	0.0743002	-29.1	0.0867	-29.1	0.0626001		-29	0.1418	-29	0.1379	-29	0.0999
-29	0.0719001	-29	0.0948999	-29	0.0638		-28.9	0.1384	-28.9	0.1339	-28.9	0.1012
-28.9	0.0663001	-28.9	0.0978	-28.9	0.0676		-28.8	0.1426	-28.8	0.134	-28.8	0.0995
-28.8	0.0682	-28.8	0.0952	-28.8	0.0639001		-28.7	0.1411	-28.7	0.1372	-28.7	0.0956
-28.7	0.0629	-28.7	0.0932	-28.7	0.0637		-28.6	0.1381	-28.6	0.1415	-28.6	0.0956
-28.6	0.0606001	-28.6	0.0951	-28.6	0.0653		-28.5	0.1355	-28.5	0.1423	-28.5	0.0972
-28.5	0.0597001	-28.5	0.0955	-28.5	0.0685		-28.4	0.1344	-28.4	0.1388	-28.4	0.0976
-28.4	0.0607	-28.4	0.0966	-28.4	0.0662		-28.3	0.1366	-28.3	0.1342	-28.3	0.096
-28.3	0.0673	-28.3	0.0964	-28.3	0.0629		-28.2	0.1366	-28.2	0.132	-28.2	0.0932999
-28.2	0.0715	-28.2	0.0955	-28.2	0.0629		-28.1	0.1301	-28.1	0.1309	-28.1	0.0928999
-28.1	0.0687002	-28.1	0.0924	-28.1	0.0616001		-28	0.1287	-28	0.131	-28	0.0898
-28	0.0703001	-28	0.0926	-28	0.0574001		-27.9	0.1273	-27.9	0.1265	-27.9	0.0878
-27.9	0.0695001	-27.9	0.0893	-27.9	0.0577		-27.8	0.1276	-27.8	0.1318	-27.8	0.0894
-27.8	0.0739	-27.8	0.0929999	-27.8	0.0523		-27.7	0.121	-27.7	0.1314	-27.7	0.0914999
-27.7	0.0752	-27.7	0.0909	-27.7	0.0503		-27.6	0.119	-27.6	0.1265	-27.6	0.0936999
-27.6	0.0786001	-27.6	0.0915	-27.6	0.0497001		-27.5	0.119	-27.5	0.1201	-27.5	0.0966
-27.5	0.0805	-27.5	0.0890001	-27.5	0.0457001		-27.4	0.1158	-27.4	0.1257	-27.4	0.0971
-27.4	0.0832001	-27.4	0.0912999	-27.4	0.0414		-27.3	0.1122	-27.3	0.1249	-27.3	0.0995
-27.3	0.0831001	-27.3	0.0909	-27.3	0.0382		-27.2	0.1158	-27.2	0.1272	-27.2	0.1004
-27.2	0.0846	-27.2	0.0974	-27.2	0.0374		-27.1	0.1185	-27.1	0.1274	-27.1	0.0946
-27.1	0.0862	-27.1	0.0967	-27.1	0.0333001		-27	0.1181	-27	0.1299	-27	0.0981
-27	0.0905001	-27	0.0979	-27	0.0376		-26.9	0.1158	-26.9	0.1322	-26.9	0.0947
-26.9	0.0957	-26.9	0.1002	-26.9	0.0401		-26.8	0.1127	-26.8	0.1309	-26.8	0.0923
-26.8	0.0936001	-26.8	0.0982	-26.8	0.0363001		-26.7	0.1125	-26.7	0.1303	-26.7	0.0892
-26.7	0.093	-26.7	0.0991	-26.7	0.0322		-26.6	0.1136	-26.6	0.1306	-26.6	0.0873999
-26.6	0.088	-26.6	0.1026	-26.6	0.0325001		-26.5	0.1122	-26.5	0.1317	-26.5	0.0843
-26.5	0.0852001	-26.5	0.1022	-26.5	0.0294001		-26.4	0.1153	-26.4	0.1277	-26.4	0.0809
-26.4	0.0845001	-26.4	0.1016	-26.4	0.0293		-26.3	0.1197	-26.3	0.1243	-26.3	0.0755
-26.3	0.0897	-26.3	0.0957	-26.3	0.0318001		-26.2	0.1216	-26.2	0.1234	-26.2	0.0767999
-26.2	0.0881	-26.2	0.0897	-26.2	0.0331		-26.1	0.1198	-26.1	0.1242	-26.1	0.0782999
-26.1	0.0851001	-26.1	0.0902	-26.1	0.0333001		-26	0.1165	-26	0.1243	-26	0.0773
-26	0.0818001	-26	0.0854	-26	0.0299001		-25.9	0.1145	-25.9	0.1215	-25.9	0.0793
-25.9	0.0809001	-25.9	0.0831	-25.9	0.0357		-25.8	0.1136	-25.8	0.1162	-25.8	0.0768
-25.8	0.0795001	-25.8	0.0786001	-25.8	0.0382		-25.7	0.1121	-25.7	0.114	-25.7	0.0787999
-25.7	0.0795	-25.7	0.0772	-25.7	0.0388		-25.6	0.1163	-25.6	0.1105	-25.6	0.0740999
-25.6	0.0844	-25.6	0.0752001	-25.6	0.0302002		-25.5	0.1196	-25.5	0.104	-25.5	0.0691
-25.5	0.0877	-25.5	0.0702001	-25.5	0.0279001		-25.4	0.1204	-25.4	0.0986	-25.4	0.0701
-25.4	0.0886001	-25.4	0.0644001	-25.4	0.0273		-25.3	0.1164	-25.3	0.0945	-25.3	0.073
-25.3	0.0879001	-25.3	0.0631	-25.3	0.0287		-25.2	0.1131	-25.2	0.0916	-25.2	0.0709
-25.2	0.0873	-25.2	0.0647	-25.2	0.0246		-25.1	0.1112	-25.1	0.0869	-25.1	0.0719999
-25.1	0.0887001	-25.1	0.0652	-25.1	0.0284		-25	0.1148	-25	0.085	-25	0.0699
-25	0.0917	-25	0.0678	-25	0.0312001		-24.9	0.1151	-24.9	0.0823	-24.9	0.0726
-24.9	0.0939	-24.9	0.0654	-24.9	0.033		-24.8	0.1142	-24.8	0.0878	-24.8	0.0765
-24.8	0.0998	-24.8	0.067	-24.8	0.0329		-24.7	0.1127	-24.7	0.0864	-24.7	0.0776999
-24.7	0.1014	-24.7	0.0705	-24.7	0.0364		-24.6	0.1123	-24.6	0.0848999	-24.6	0.0782998
-24.6	0.1021	-24.6	0.0691	-24.6	0.0363001		-24.5	0.1123	-24.5	0.0799	-24.5	0.0694
-24.5	0.1043	-24.5	0.0643001	-24.5	0.0312001		-24.4	0.1122	-24.4	0.0796	-24.4	0.0697
-24.4	0.1076	-24.4	0.0646	-24.4	0.0307001		-24.3	0.1114	-24.3	0.0798	-24.3	0.0712
-24.3	0.107	-24.3	0.062	-24.3	0.0274001		-24.2	0.1138	-24.2	0.0809	-24.2	0.0689
-24.2	0.1105	-24.2	0.0608	-24.2	0.024		-24.1	0.1168	-24.1	0.0828999	-24.1	0.0698999
-24.1	0.1124	-24.1	0.0586	-24.1	0.0305		-24	0.1157	-24	0.0784	-24	0.069
-24	0.1092	-24	0.0578001	-24	0.0281001		-23.9	0.1146	-23.9	0.072	-23.9	0.0639
-23.9	0.1084	-23.9	0.0516001	-23.9	0.0211001		-23.8	0.1199	-23.8	0.0728	-23.8	0.0629
-23.8	0.1103	-23.8	0.0484	-23.8	0.0139001		-23.7	0.1199	-23.7	0.0771	-23.7	0.0645
-23.7	0.1105	-23.7	0.0509	-23.7	0.0172		-23.6	0.1168	-23.6	0.0782	-23.6	0.0723999
-23.6	0.1122	-23.6	0.0493	-23.6	0.0256		-23.5	0.1153	-23.5	0.0786	-23.5	0.0748
-23.5	0.1144	-23.5	0.0479	-23.5	0.029		-23.4	0.1163	-23.4	0.0747	-23.4	0.0745
-23.4	0.1141	-23.4	0.0487	-23.4	0.0308		-23.3	0.1127	-23.3	0.0753	-23.3	0.0726
-23.3	0.1115	-23.3	0.051	-23.3	0.0327		-23.2	0.1154	-23.2	0.079	-23.2	0.0693
-23.2	0.1127	-23.2	0.049	-23.2	0.0345		-23.1	0.1164	-23.1	0.0796	-23.1	0.0701
-23.1	0.1172	-23.1	0.0495	-23.1	0.0362		-23	0.1196	-23	0.0766	-23	0.0709
-23	0.1213	-23	0.0458	-23	0.0338001		-22.9	0.1184	-22.9	0.0746	-22.9	0.0685
-22.9	0.1232	-22.9	0.0388	-22.9	0.0344001		-22.8	0.1158	-22.8	0.0675	-22.8	0.0714
-22.8	0.1268	-22.8	0.0316001	-22.8	0.0335001		-22.7	0.112	-22.7	0.0642	-22.7	0.0749
-22.7	0.1268	-22.7	0.0307	-22.7	0.0353		-22.6	0.1138	-22.6	0.0651	-22.6	0.0816
-22.6	0.129	-22.6	0.0309	-22.6	0.0382		-22.5	0.1198	-22.5	0.07	-22.5	0.0899
-22.5	0.129	-22.5	0.0302	-22.5	0.0394		-22.4	0.1171	-22.4	0.0753	-22.4	0.0929
-22.4	0.1304	-22.4	0.0343	-22.4	0.0467		-22.3	0.1218	-22.3	0.0771	-22.3	0.0928
-22.3	0.1382	-22.3	0.0375999	-22.3	0.0456		-22.2	0.1237	-22.2	0.0741	-22.2	0.0921
-22.2	0.1381	-22.2	0.0351	-22.2	0.0443		-22.1	0.1231	-22.1	0.0716	-22.1	0.0897999
-22.1	0.1371	-22.1	0.0384	-22.1	0.0444001		-22	0.1214	-22	0.0716	-22	0.0859
-22	0.1274	-22	0.0363	-22	0.0430001		-21.9	0.1278	-21.9	0.0727	-21.9	0.0893
-21.9	0.1299	-21.9	0.0353	-21.9	0.0528999		-21.8	0.1294	-21.8	0.0645	-21.8	0.0911
-21.8	0.123	-21.8	0.0252001	-21.8	0.0465002		-21.7	0.1351	-21.7	0.0490998	-21.7	0.0964999
-21.7	0.1211	-21.7	0.0115	-21.7	0.0482		-21.6	0.1441	-21.6	0.0355998	-21.6	0.1034
-21.6	0.1296	-21.6	-0.00899976	-21.6	0.0508001		-21.5	0.1463	-21.5	0.0302	-21.5	0.108
-21.5	0.1383	-21.5	-0.0260998	-21.5	0.0473001		-21.4	0.1367	-21.4	0.0258	-21.4	0.1122
-21.4	0.1383	-21.4	-0.0297999	-21.4	0.0439001		-21.3	0.1283	-21.3	0.0285	-21.3	0.1061
-21.3	0.1341	-21.3	-0.029	-21.3	0.0399001		-21.2	0.1207	-21.2	0.0326	-21.2	0.1021
-21.2	0.1223	-21.2	-0.0262	-21.2	0.0396		-21.1	0.1162	-21.1	0.0362	-21.1	0.1004
-21.1	0.1188	-21.1	-0.0225	-21.1	0.0403001		-21	0.1119	-21	0.0407	-21	0.0998
-21	0.1226	-21	-0.018	-21	0.0382001		-20.9	0.1107	-20.9	0.0427	-20.9	0.0922
-20.9	0.13	-20.9	-0.0209999	-20.9	0.0362001		-20.8	0.1162	-20.8	0.0361	-20.8	0.0895
-20.8	0.1358	-20.8	-0.0242999	-20.8	0.0360001		-20.7	0.1136	-20.7	0.0266	-20.7	0.0860998
-20.7	0.1316	-20.7	-0.0257	-20.7	0.0336		-20.6	0.1145	-20.6	0.0287	-20.6	0.0809999
-20.6	0.1313	-20.6	-0.0252	-20.6	0.0308002		-20.5	0.1203	-20.5	0.031	-20.5	0.0795
-20.5	0.1324	-20.5	-0.0209	-20.5	0.0305001		-20.4	0.1196	-20.4	0.0299	-20.4	0.0787
-20.4	0.1361	-20.4	-0.0222	-20.4	0.0359		-20.3	0.1248	-20.3	0.0301	-20.3	0.0774
-20.3	0.1438	-20.3	-0.0266	-20.3	0.0404		-20.2	0.1259	-20.2	0.0319	-20.2	0.0697999
-20.2	0.1409	-20.2	-0.0206	-20.2	0.04		-20.1	0.133	-20.1	0.0328001	-20.1	0.0674999
-20.1	0.1442	-20.1	-0.0126	-20.1	0.0393001		-20	0.1317	-20	0.0438	-20	0.0599
-20	0.1388	-20	-0.00650012	-20	0.0430001		-19.9	0.13	-19.9	0.0549	-19.9	0.0531
-19.9	0.1337	-19.9	-0.00420005	-19.9	0.0432001		-19.8	0.1288	-19.8	0.0518	-19.8	0.0487
-19.8	0.1321	-19.8	-0.00619991	-19.8	0.0455001		-19.7	0.1221	-19.7	0.0601	-19.7	0.0486999
-19.7	0.1224	-19.7	-0.000700007	-19.7	0.0392		-19.6	0.1151	-19.6	0.0621999	-19.6	0.0527999
-19.6	0.1175	-19.6	0.000799974	-19.6	0.0370001		-19.5	0.117	-19.5	0.056	-19.5	0.0522
-19.5	0.1111	-19.5	9.16734e-08	-19.5	0.0355001		-19.4	0.1184	-19.4	0.0594	-19.4	0.0472
-19.4	0.1043	-19.4	0.000700033	-19.4	0.0334002		-19.3	0.1135	-19.3	0.0584	-19.3	0.0441
-19.3	0.0986002	-19.3	0.0039	-19.3	0.0342002		-19.2	0.1036	-19.2	0.0548998	-19.2	0.0435998
-19.2	0.0926	-19.2	0.0079	-19.2	0.0331		-19.1	0.1023	-19.1	0.0470999	-19.1	0.0373998
-19.1	0.0947001	-19.1	0.000800184	-19.1	0.0348002		-19	0.1071	-19	0.0357	-19	0.0361
-19	0.0909001	-19	0.00120015	-19	0.0342002		-18.9	0.1027	-18.9	0.0337	-18.9	0.029
-18.9	0.0846002	-18.9	-0.00139993	-18.9	0.0267002		-18.8	0.1039	-18.8	0.0333	-18.8	0.0303
-18.8	0.0810002	-18.8	-0.00199989	-18.8	0.0306		-18.7	0.1025	-18.7	0.0416001	-18.7	0.0318
-18.7	0.0752	-18.7	0.0041	-18.7	0.0365		-18.6	0.1007	-18.6	0.0499	-18.6	0.0298999
-18.6	0.0695001	-18.6	0.00609994	-18.6	0.0342		-18.5	0.0952	-18.5	0.0476	-18.5	0.0289
-18.5	0.0621001	-18.5	0.00280001	-18.5	0.0342001		-18.4	0.0912	-18.4	0.0494	-18.4	0.0237
-18.4	0.054	-18.4	0.00469997	-18.4	0.0329001		-18.3	0.0862	-18.3	0.058	-18.3	0.0247
-18.3	0.062	-18.3	0.0128	-18.3	0.0326001		-18.2	0.0835999	-18.2	0.0563999	-18.2	0.0243999
-18.2	0.0714	-18.2	0.0164	-18.2	0.0327		-18.1	0.0808999	-18.1	0.0567999	-18.1	0.0256999
-18.1	0.0732001	-18.1	0.0214001	-18.1	0.0339001		-18	0.0799	-18	0.0516	-18	0.0271
-18	0.0718001	-18	0.0269001	-18	0.0364001		-17.9	0.0826	-17.9	0.0465	-17.9	0.0323
-17.9	0.0714	-17.9	0.0285002	-17.9	0.0340001		-17.8	0.0852	-17.8	0.0576	-17.8	0.039
-17.8	0.0732	-17.8	0.0420999	-17.8	0.0429		-17.7	0.0829	-17.7	0.0644	-17.7	0.0444
-17.7	0.0734	-17.7	0.054	-17.7	0.0477		-17.6	0.0793001	-17.6	0.0659	-17.6	0.0399001
-17.6	0.068	-17.6	0.0565	-17.6	0.0529		-17.5	0.0831	-17.5	0.0649	-17.5	0.0411
-17.5	0.0683	-17.5	0.0466	-17.5	0.0612999		-17.4	0.0893	-17.4	0.0648	-17.4	0.0369
-17.4	0.0676	-17.4	0.0487	-17.4	0.0563001		-17.3	0.0916	-17.3	0.0613	-17.3	0.033
-17.3	0.0716999	-17.3	0.0515999	-17.3	0.0466001		-17.2	0.0880998	-17.2	0.0498999	-17.2	0.0293999
-17.2	0.0742	-17.2	0.0398	-17.2	0.0405		-17.1	0.0756999	-17.1	0.0449998	-17.1	0.0317999
-17.1	0.0669002	-17.1	0.0415001	-17.1	0.0366001		-17	0.0683	-17	0.0383	-17	0.0312
-17	0.0726001	-17	0.0371002	-17	0.0374001		-16.9	0.066	-16.9	0.0281	-16.9	0.0316
-16.9	0.0669001	-16.9	0.0384001	-16.9	0.0363002		-16.8	0.0719	-16.8	0.0261	-16.8	0.0259
-16.8	0.0651001	-16.8	0.0355001	-16.8	0.0390001		-16.7	0.0842999	-16.7	0.0244999	-16.7	0.0308
-16.7	0.0652	-16.7	0.0394	-16.7	0.053		-16.6	0.0847001	-16.6	0.0164999	-16.6	0.0332
-16.6	0.0583001	-16.6	0.0374001	-16.6	0.0608		-16.5	0.0972	-16.5	0.0146	-16.5	0.0396
-16.5	0.0630999	-16.5	0.0418001	-16.5	0.0669		-16.4	0.107	-16.4	0.0174	-16.4	0.0454
-16.4	0.0727998	-16.4	0.0496	-16.4	0.0700999		-16.3	0.1106	-16.3	0.0139	-16.3	0.0598
-16.3	0.0788999	-16.3	0.0552999	-16.3	0.0790998		-16.2	0.1143	-16.2	0.0210001	-16.2	0.0705001
-16.2	0.0844	-16.2	0.0625	-16.2	0.078		-16.1	0.1116	-16.1	0.0271	-16.1	0.0782001
-16.1	0.0906998	-16.1	0.0676999	-16.1	0.0790999		-16	0.1125	-16	0.0267	-16	0.0872
-16	0.0985999	-16	0.0641	-16	0.0808999		-15.9	0.1079	-15.9	0.0251	-15.9	0.0965
-15.9	0.1084	-15.9	0.0565	-15.9	0.0817999		-15.8	0.1077	-15.8	0.0266	-15.8	0.0992
-15.8	0.1196	-15.8	0.047	-15.8	0.0807		-15.7	0.0959	-15.7	0.0257999	-15.7	0.1051
-15.7	0.1208	-15.7	0.0433	-15.7	0.0793		-15.6	0.0947999	-15.6	0.0225999	-15.6	0.1082
-15.6	0.1274	-15.6	0.0353001	-15.6	0.0743001		-15.5	0.0853	-15.5	0.0201	-15.5	0.1144
-15.5	0.1278	-15.5	0.0269001	-15.5	0.0715		-15.4	0.0846	-15.4	0.0185	-15.4	0.1188
-15.4	0.1318	-15.4	0.0241	-15.4	0.0664001		-15.3	0.0768	-15.3	0.0176	-15.3	0.1245
-15.3	0.1338	-15.3	0.0211	-15.3	0.0671		-15.2	0.0716999	-15.2	0.0184	-15.2	0.1264
-15.2	0.1362	-15.2	0.0208	-15.2	0.067		-15.1	0.0718999	-15.1	0.0146001	-15.1	0.1272
-15.1	0.1333	-15.1	0.0185	-15.1	0.0686		-15	0.0632	-15	0.0169	-15	0.1256
-15	0.1272	-15	0.0285999	-15	0.0697		-14.9	0.0606	-14.9	0.017	-14.9	0.1312
-14.9	0.1265	-14.9	0.0159999	-14.9	0.0887999		-14.8	0.0783	-14.8	0.0063	-14.8	0.1248
-14.8	0.1243	-14.8	0.0103999	-14.8	0.0892001		-14.7	0.0912998	-14.7	0.00129994	-14.7	0.1154
-14.7	0.1052	-14.7	0.0269	-14.7	0.0876		-14.6	0.0930998	-14.6	0.00269976	-14.6	0.1061
-14.6	0.0935002	-14.6	0.0387001	-14.6	0.0932001		-14.5	0.0813	-14.5	-0.0077	-14.5	0.1035
-14.5	0.0850002	-14.5	0.0247002	-14.5	0.1015		-14.4	0.0807	-14.4	-0.0263	-14.4	0.1047
-14.4	0.092	-14.4	0.0132002	-14.4	0.1123		-14.3	0.0735	-14.3	-0.0351	-14.3	0.1034
-14.3	0.0770002	-14.3	0.00930016	-14.3	0.1134		-14.2	0.0856	-14.2	-0.0446	-14.2	0.0977999
-14.2	0.0844	-14.2	0.0135	-14.2	0.1158		-14.1	0.0884	-14.1	-0.0410001	-14.1	0.0944999
-14.1	0.0846	-14.1	0.0203	-14.1	0.1119		-14	0.0929	-14	-0.0433	-14	0.0892
-14	0.0788	-14	0.0230001	-14	0.1139		-13.9	0.088	-13.9	-0.0372	-13.9	0.088
-13.9	0.0749001	-13.9	0.0245	-13.9	0.1132		-13.8	0.0839	-13.8	-0.031	-13.8	0.0843
-13.8	0.0672001	-13.8	0.0258999	-13.8	0.1093		-13.7	0.0826999	-13.7	-0.0267999	-13.7	0.0774999
-13.7	0.0638	-13.7	0.0271	-13.7	0.0997		-13.6	0.0789997	-13.6	-0.0217998	-13.6	0.0748
-13.6	0.0640001	-13.6	0.0304999	-13.6	0.0879001		-13.5	0.0618	-13.5	-0.0178	-13.5	0.0737
-13.5	0.0559003	-13.5	0.0442998	-13.5	0.0854		-13.4	0.0427	-13.4	-0.0196	-13.4	0.0678
-13.4	0.0430003	-13.4	0.0415	-13.4	0.0847		-13.3	0.0269	-13.3	-0.0245	-13.3	0.063
-13.3	0.0403	-13.3	0.0268001	-13.3	0.0863		-13.2	0.0144	-13.2	-0.0321002	-13.2	0.0598001
-13.2	0.0408	-13.2	0.0248	-13.2	0.0861		-13.1	0.012	-13.1	-0.0409002	-13.1	0.0632001
-13.1	0.0544	-13.1	0.0197002	-13.1	0.0961999		-13	0.0255	-13	-0.0417	-13	0.0656
-13	0.0638	-13	0.0125002	-13	0.1031		-12.9	0.0413	-12.9	-0.038	-12.9	0.0781
-12.9	0.0778999	-12.9	0.00770011	-12.9	0.1151		-12.8	0.0472	-12.8	-0.0378	-12.8	0.079
-12.8	0.0807	-12.8	0.00470005	-12.8	0.1163		-12.7	0.0498998	-12.7	-0.0322999	-12.7	0.0768998
-12.7	0.0806	-12.7	0.0145	-12.7	0.1166		-12.6	0.0424997	-12.6	-0.0205999	-12.6	0.0645998
-12.6	0.0725002	-12.6	0.0281999	-12.6	0.1041		-12.5	0.0285	-12.5	-0.0121	-12.5	0.0568
-12.5	0.0628003	-12.5	0.0308999	-12.5	0.0936002		-12.4	0.0101	-12.4	-0.0102	-12.4	0.0489
-12.4	0.0475003	-12.4	0.0269	-12.4	0.0804002		-12.3	0.00409999	-12.3	-0.0055	-12.3	0.0435
-12.3	0.0417003	-12.3	0.0242999	-12.3	0.0676002		-12.2	-0.00350033	-12.2	-0.00379998	-12.2	0.0399998
-12.2	0.0303	-12.2	0.0197	-12.2	0.0595		-12.1	-0.0131003	-12.1	-0.00370003	-12.1	0.0277999
-12.1	0.0231003	-12.1	0.0175	-12.1	0.0505002		-12	-0.0199	-12	-0.0073	-12	0.0218
-12	0.0187003	-12	0.0142	-12	0.0480001		-11.9	-0.0271	-11.9	-0.0045	-11.9	0.0154
-11.9	0.0137004	-11.9	0.00749994	-11.9	0.0397001		-11.8	-0.0276	-11.8	-0.0018	-11.8	0.0139
-11.8	0.00820028	-11.8	0.0070999	-11.8	0.0337001		-11.7	-0.0265002	-11.7	0.00320005	-11.7	0.00799998
-11.7	0.0141	-11.7	0.0025	-11.7	0.0269		-11.6	-0.0259001	-11.6	0.00399996	-11.6	0.0122999
-11.6	0.0167002	-11.6	-0.00160004	-11.6	0.0315		-11.5	-0.0249	-11.5	0.0039	-11.5	0.0068
-11.5	0.0207001	-11.5	-0.00449996	-11.5	0.0240001		-11.4	-0.0173	-11.4	-0.0016	-11.4	0.0087
-11.4	0.0245001	-11.4	-0.0134999	-11.4	0.0235001		-11.3	-0.0127	-11.3	-0.0043	-11.3	0.00690001
-11.3	0.0278001	-11.3	-0.0225999	-11.3	0.0254001		-11.2	-0.00970007	-11.2	-0.00359994	-11.2	0.00940003
-11.2	0.0322	-11.2	-0.0181	-11.2	0.0292		-11.1	-0.0087002	-11.1	0.00249996	-11.1	0.0147
-11.1	0.0342001	-11.1	-0.0124001	-11.1	0.0384		-11	-0.0124	-11	0.0041	-11	0.0202
-11	0.0264002	-11	-0.0101	-11	0.0419		-10.9	-0.0113	-10.9	0.0041	-10.9	0.0159
-10.9	0.0197002	-10.9	-0.0101999	-10.9	0.0384001		-10.8	-0.0103	-10.8	0.0025	-10.8	0.0134
-10.8	0.0165001	-10.8	-0.0104999	-10.8	0.0366001		-10.7	-0.00660007	-10.7	0.000199934	-10.7	0.0105999
-10.7	0.0194	-10.7	-0.0107	-10.7	0.0348		-10.6	-0.000500054	-10.6	0.00129992	-10.6	0.0076999
-10.6	0.0198001	-10.6	-0.00659993	-10.6	0.0349001		-10.5	0.0017	-10.5	0.0018	-10.5	0.00659999
-10.5	0.0208	-10.5	-0.00669992	-10.5	0.0340001		-10.4	-0.0015	-10.4	0.0046	-10.4	0.00410001
-10.4	0.0162001	-10.4	-0.00590002	-10.4	0.0269001		-10.3	0.0015	-10.3	0.0033	-10.3	-0.0038
-10.3	0.0200001	-10.3	-0.00629996	-10.3	0.0219001		-10.2	0.00169989	-10.2	0.00280003	-10.2	-0.00290003
-10.2	0.0187	-10.2	-0.0067	-10.2	0.0245		-10.1	0.0018999	-10.1	0.00719997	-10.1	-0.00220004
-10.1	0.0175001	-10.1	-0.00680003	-10.1	0.0283		-10	0.0058	-10	0.0063	-10	-0.0041
-10	0.0184001	-10	-0.0111	-10	0.0259		-9.9	0.004	-9.9	0.0052	-9.9	-0.0028
-9.9	0.0165001	-9.9	-0.012	-9.9	0.0305		-9.8	0.00699999	-9.8	0.0076	-9.8	0.0019
-9.8	0.00830014	-9.8	-0.0136	-9.8	0.0335		-9.7	0.00479984	-9.7	0.00249993	-9.7	0.00469999
-9.7	-0.000499994	-9.7	-0.0208	-9.7	0.0345		-9.6	0.00169989	-9.6	-0.00269998	-9.6	0.0044
-9.6	-0.00399984	-9.6	-0.0251999	-9.6	0.0354		-9.5	-0.000900003	-9.5	-0.0038	-9.5	0.0059
-9.5	-0.00859988	-9.5	-0.0226	-9.5	0.0384		-9.4	0.000999995	-9.4	-0.0085	-9.4	0.0038
-9.4	-0.00489995	-9.4	-0.0238	-9.4	0.0387		-9.3	-0.000399997	-9.3	-0.0048	-9.3	0.0063
-9.3	-0.00529986	-9.3	-0.0196001	-9.3	0.0386		-9.2	0.00809984	-9.2	-0.00199999	-9.2	0.0119999
-9.2	-0.0069	-9.2	-0.0176	-9.2	0.0417		-9.1	0.00549988	-9.1	-0.000199972	-9.1	0.0118999
-9.1	-0.00719984	-9.1	-0.0167	-9.1	0.0397001		-9	0.002	-9	0.000799999	-9	0.011
-9	-0.0130999	-9	-0.0157	-9	0.0391001		-8.9	0.0028	-8.9	-0.0025	-8.9	0.01
-8.9	-0.0127999	-8.9	-0.0199	-8.9	0.0364		-8.8	-0.0018	-8.8	-0.0059	-8.8	0.01
-8.8	-0.0136999	-8.8	-0.0274999	-8.8	0.0349		-8.7	-0.00920014	-8.7	-0.00539996	-8.7	0.0151
-8.7	-0.0164	-8.7	-0.0287	-8.7	0.0393		-8.6	-0.0116001	-8.6	-0.00160004	-8.6	0.0192999
-8.6	-0.0203999	-8.6	-0.027	-8.6	0.0408		-8.5	-0.0123	-8.5	-0.0063	-8.5	0.0215
-8.5	-0.0267999	-8.5	-0.031	-8.5	0.0363001		-8.4	-0.0058	-8.4	-0.0106	-8.4	0.0227
-8.4	-0.0245	-8.4	-0.0338	-8.4	0.0356		-8.3	-0.0013	-8.3	-0.0115	-8.3	0.0169
-8.3	-0.0201	-8.3	-0.036	-8.3	0.0340001		-8.2	-0.00650001	-8.2	-0.0184001	-8.2	0.0140999
-8.2	-0.02	-8.2	-0.038	-8.2	0.0358		-8.1	-0.00789995	-8.1	-0.0169999	-8.1	0.0132
-8.1	-0.0132	-8.1	-0.0361999	-8.1	0.0335001		-8	-0.0067	-8	-0.0049	-8	0.0151
-8	-0.0161	-8	-0.0258001	-8	0.0269		-7.9	-0.004	-7.9	-0.0055	-7.9	0.0105
-7.9	-0.00970003	-7.9	-0.0175	-7.9	0.0187001		-7.8	-0.0066	-7.8	-0.0159	-7.8	0.0047
-7.8	0.000799982	-7.8	-0.0186999	-7.8	0.0175002		-7.7	-0.00780001	-7.7	-0.0215	-7.7	0.00879998
-7.7	0.0017	-7.7	-0.0205	-7.7	0.0156		-7.6	-0.00590002	-7.6	-0.0148	-7.6	0.0133
-7.6	0.00520001	-7.6	-0.0207	-7.6	0.0127		-7.5	-0.0037	-7.5	-0.0112	-7.5	0.0152
-7.5	0.0102	-7.5	-0.0218	-7.5	0.0156		-7.4	-0.0033	-7.4	-0.0119	-7.4	0.0145
-7.4	0.00830007	-7.4	-0.0212999	-7.4	0.0118001		-7.3	-0.0044	-7.3	-0.0141	-7.3	0.0126
-7.3	0.00920006	-7.3	-0.0256999	-7.3	0.0102001		-7.2	-0.00360002	-7.2	-0.00819997	-7.2	0.00899998
-7.2	0.0106	-7.2	-0.02	-7.2	0.0048		-7.1	-0.00220007	-7.1	-0.00879998	-7.1	0.0107
-7.1	0.0103	-7.1	-0.0168	-7.1	0.00480002		-7	-0.004	-7	-0.0071	-7	0.0126
-7	0.00740007	-7	-0.0132	-7	0.0081		-6.9	-0.0049	-6.9	-0.0037	-6.9	0.0123
-6.9	0.00480008	-6.9	-0.00980002	-6.9	0.00860002		-6.8	-0.0068	-6.8	-0.0069	-6.8	0.0068
-6.8	0.00580005	-6.8	-0.00879996	-6.8	0.00750008		-6.7	-0.00620007	-6.7	-0.00620007	-6.7	0.00439993
-6.7	0.0085	-6.7	-0.0075	-6.7	0.0074		-6.6	-0.00780005	-6.6	-0.0117	-6.6	0.00279991
-6.6	0.00890007	-6.6	-0.00959993	-6.6	0.00470007		-6.5	-0.0054	-6.5	-0.0089	-6.5	-0.000599999
-6.5	0.0131	-6.5	-0.00770002	-6.5	0.00160009		-6.4	-0.0042	-6.4	-0.0058	-6.4	-1.19326e-09
-6.4	0.0154001	-6.4	-0.00849999	-6.4	0.00190005		-6.3	-0.0052	-6.3	-0.0055	-6.3	-3.20142e-10
-6.3	0.0158001	-6.3	-0.00899998	-6.3	-0.00209991		-6.2	-0.00510002	-6.2	-0.0115	-6.2	0.00229998
-6.2	0.0145	-6.2	-0.0115	-6.2	-0.0025		-6.1	-0.00450001	-6.1	-0.0136	-6.1	0.0014
-6.1	0.0144	-6.1	-0.00919997	-6.1	-0.00119998		-6	-0.0016	-6	-0.0131	-6	0.002
-6	0.0176	-6	-0.00899998	-6	0.000400003		-5.9	0.0013	-5.9	-0.0112	-5.9	0.0013
-5.9	0.0231	-5.9	-0.00700002	-5.9	-0.00189993		-5.8	0.0016	-5.8	-0.0106	-5.8	-0.0013
-5.8	0.0241	-5.8	-0.0054	-5.8	-0.00109989		-5.7	0.00469996	-5.7	-0.0115	-5.7	-0.00150002
-5.7	0.023	-5.7	-0.0075	-5.7	-0.0008		-5.6	0.00899998	-5.6	-0.0114	-5.6	0.000199976
-5.6	0.02	-5.6	-0.00879997	-5.6	0.000700025		-5.5	0.0118	-5.5	-0.0097	-5.5	0.0009
-5.5	0.0163	-5.5	-0.0103	-5.5	0.00210002		-5.4	0.0068	-5.4	-0.0092	-5.4	-0.0002
-5.4	0.0154001	-5.4	-0.00780001	-5.4	0.00260006		-5.3	0.0019	-5.3	-0.0068	-5.3	-0.0006
-5.3	0.00900013	-5.3	-0.00329998	-5.3	0.00629998		-5.2	0.000199889	-5.2	-0.00760002	-5.2	-0.00290007
-5.2	0.0042	-5.2	-0.0058	-5.2	0.0012		-5.1	-0.0034	-5.1	-0.00640001	-5.1	-0.00110005
-5.1	-0.00119989	-5.1	-0.00609998	-5.1	0.000500069		-5	0	-5	-0.0051	-5	0
-5	-9.99981e-05	-5	-0.00499999	-5	0.000700046		-4.9	0.00139998	-4.9	-0.00299997	-4.9	0.000199998
-4.9	0.0021	-4.9	-0.0051	-4.9	-0.0009		-4.8	0.0025	-4.8	-0.0014	-4.8	0.0041
-4.8	0.00190003	-4.8	-0.00240006	-4.8	0.0018		-4.7	-0.0006	-4.7	0.0031	-4.7	0.0061
-4.7	0.0003	-4.7	0.004	-4.7	0.0027		-4.6	-0.0076	-4.6	0.0046	-4.6	0.0071
-4.6	-0.00369977	-4.6	0.00289996	-4.6	0.00150011		-4.5	-0.0127	-4.5	0.008	-4.5	0.0106
-4.5	-0.006	-4.5	0.0041	-4.5	0.0075		-4.4	-0.0142002	-4.4	0.00859989	-4.4	0.0115999
-4.4	-0.0072	-4.4	0.0035	-4.4	0.0109		-4.3	-0.0201	-4.3	0.0051	-4.3	0.0154
-4.3	-0.00959978	-4.3	0.000500107	-4.3	0.00910009		-4.2	-0.0182	-4.2	0.0056	-4.2	0.0171
-4.2	-0.0045	-4.2	-9.99999e-05	-4.2	0.0079		-4.1	-0.0198	-4.1	0.0015	-4.1	0.0135
-4.1	-0.00469987	-4.1	-0.00339981	-4.1	0.00910014		-4	-0.02	-4	0.0045	-4	0.0132
-4	-0.0058	-4	0.0017	-4	0.0107		-3.9	-0.0204001	-3.9	0.00810002	-3.9	0.0100999
-3.9	-0.0055	-3.9	0.0019	-3.9	0.0091		-3.8	-0.0185	-3.8	0.0095	-3.8	0.006
-3.8	-0.00409994	-3.8	0.00369998	-3.8	0.00660015		-3.7	-0.0204	-3.7	0.0107	-3.7	0.0015
-3.7	0.0022	-3.7	0.0038	-3.7	0.0068		-3.6	-0.0231	-3.6	0.0132	-3.6	-0.0029
-3.6	0.00280024	-3.6	0.00580008	-3.6	0.00690025		-3.5	-0.0296	-3.5	0.0107	-3.5	-0.000100001
-3.5	-0.0055	-3.5	0.0058	-3.5	-0.0028		-3.4	-0.0224999	-3.4	0.00660002	-3.4	-0.00790012
-3.4	-0.0033	-3.4	0.0032	-3.4	-0.0111		-3.3	-0.0206	-3.3	0.008	-3.3	-0.0126
-3.3	-0.00360012	-3.3	0.00189998	-3.3	-0.0100999		-3.2	-0.0098	-3.2	0.0074	-3.2	-0.0183
-3.2	-0.0083	-3.2	0.0026	-3.2	-0.0088		-3.1	-0.000599998	-3.1	0.0061	-3.1	-0.023
-3.1	-0.00440017	-3.1	-0.000199901	-3.1	-0.00749988		-3	-0.0089	-3	0.0082	-3	-0.0286
-3	-0.0042	-3	0.0081	-3	-0.0092		-2.9	-0.0105	-2.9	0.00559998	-2.9	-0.0274001
-2.9	-0.0038	-2.9	0.005	-2.9	-0.0084		-2.8	-0.0107	-2.8	0.009	-2.8	-0.0261
-2.8	-0.00650003	-2.8	0.00390002	-2.8	-0.00719992		-2.7	-0.0134	-2.7	0.0107	-2.7	-0.032
-2.7	-0.0045	-2.7	0.0025	-2.7	-0.0073		-2.6	-0.0085	-2.6	0.0159	-2.6	-0.0349
-2.6	-0.00430001	-2.6	0.00469994	-2.6	-0.00979984		-2.5	-0.0102	-2.5	0.0151	-2.5	-0.0358
-2.5	-0.0042	-2.5	0.0068	-2.5	-0.0059		-2.4	-0.0136001	-2.4	0.0166001	-2.4	-0.0384001
-2.4	-0.006	-2.4	0.0083	-2.4	-0.0082		-2.3	-0.0175	-2.3	0.0211	-2.3	-0.0343
-2.3	-0.00929989	-2.3	0.0127999	-2.3	-0.00109989		-2.2	-0.0258	-2.2	0.0162	-2.2	-0.0369
-2.2	-0.0106	-2.2	0.0122	-2.2	-0.0032		-2.1	-0.0231	-2.1	0.0224	-2.1	-0.0365
-2.1	-0.00559989	-2.1	0.0189998	-2.1	0.00240006		-2	-0.0151	-2	0.0232	-2	-0.0386
-2	-0.0051	-2	0.0167	-2	0.0035		-1.9	-0.0128003	-1.9	0.0204	-1.9	-0.0437
-1.9	-0.012	-1.9	0.0148	-1.9	-0.0045		-1.8	-0.0214	-1.8	0.0213	-1.8	-0.0367
-1.8	-0.0105997	-1.8	0.014	-1.8	-0.000100049		-1.7	-0.0234	-1.7	0.023	-1.7	-0.029
-1.7	-0.0151	-1.7	0.0143	-1.7	0.002		-1.6	-0.0373	-1.6	0.021	-1.6	-0.0288
-1.6	-0.0271994	-1.6	0.0169	-1.6	0.0138		-1.5	-0.0384	-1.5	0.0332	-1.5	-0.0211
-1.5	-0.0346	-1.5	0.0186	-1.5	0.0243		-1.4	-0.0416004	-1.4	0.0308	-1.4	-0.0211
-1.4	-0.0311	-1.4	0.0186	-1.4	0.0218		-1.3	-0.0476	-1.3	0.0308	-1.3	-0.0236
-1.3	-0.0278996	-1.3	0.0178	-1.3	0.0148002		-1.2	-0.0476	-1.2	0.0298	-1.2	-0.0236
-1.2	-0.0238	-1.2	0.0178	-1.2	0.0088		-1.1	-0.0488	-1.1	0.0275	-1.1	-0.0211
-1.1	-0.00309994	-1.1	0.0159001	-1.1	0.0054		-1	-0.0476	-1	0.0244	-1	-0.0206002
-1	0.0104	-1	0.0118	-1	4.11448e-07		-0.899998	-0.0447008	-0.899998	0.0231	-0.899998	0.0012
-0.900002	0.0104	-0.900002	0.0118	-0.900002	-0.0058		-0.799999	-0.0447008	-0.799999	0.0231	-0.799999	0.0012
-0.800003	0.0104	-0.800003	0.0116998	-0.800003	-0.0058		-0.700001	-0.0447008	-0.700001	0.0231	-0.700001	0.0012
-0.700001	0.0113	-0.700001	0.0118	-0.700001	-0.00179926		-0.599998	-0.0416004	-0.599998	0.0231	-0.599998	0.0036
-0.600002	0.0206008	-0.600002	0.0118	-0.600002	4.11448e-07		-0.5	-0.0384	-0.5	0.0244	-0.5	0.00419965
-0.5	0.0281002	-0.5	0.0159001	-0.5	0.0054		-0.399998	-0.0384	-0.399998	0.0275	-0.399998	0.0088
-0.400002	0.0283007	-0.400002	0.0178	-0.400002	0.0088		-0.299999	-0.0341	-0.299999	0.0298	-0.299999	0.0102
-0.300003	0.0307	-0.300003	0.0178	-0.300003	0.0148002		-0.200001	-0.0313	-0.200001	0.0308	-0.200001	0.012
-0.200001	0.0453	-0.200001	0.0186	-0.200001	0.0218		-0.0999985	-0.0292002	-0.0999985	0.0308	-0.0999985	0.0158
-0.100002	0.0536	-0.100002	0.0193	-0.100002	0.0243		0	-0.00539999	0	0.0332	0	0.0227993
0	1.5077	0	0.7491	0	1.1563		0.100002	0.902259	0.100002	0.510576	0.100002	0.871548
0.0999985	1.5642	0.0999985	1.189	0.0999985	1.4254		0.200001	2.9883	0.200001	1.1595	0.200001	2.0682
0.199997	5.20474	0.199997	2.20782	0.199997	4.04555		0.299999	9.9648	0.299999	4.8315	0.299999	7.9046
0.299999	9.4997	0.299999	5.6356	0.299999	5.3245		0.400002	15.1561	0.400002	9.598	0.400002	12.0068
0.399998	11.7629	0.399998	7.3882	0.399998	5.3245		0.5	19.7282	0.5	12.8061	0.5	13.9314
0.5	13.2511	0.5	8.4903	0.5	5.34591		0.600002	25.6403	0.600002	16.0531	0.600002	14.9938
0.599998	14.6311	0.599998	9.1382	0.599998	5.5378		0.700001	33.3189	0.700001	19.5734	0.700001	15.3983
0.699997	16.3837	0.699997	9.8445	0.699997	5.58351		0.799999	42.9586	0.799999	23.4994	0.799999	15.4346
0.799999	18.3129	0.799999	10.603	0.799999	5.8374		0.900002	54.1421	0.900002	27.9463	0.900002	15.7283
0.899998	20.9189	0.899998	11.4729	0.899998	5.8374		1	66.9822	1	32.7214	1	15.7734
1	23.7254	1	12.4084	1	5.8374		1.1	80.4397	1.1	37.2568	1.1	15.9655
1.1	26.5903	1.1	13.0468	1.1	5.8374		1.2	94.089	1.2	41.7568	1.2	16.0495
1.2	29.0888	1.2	13.7513	1.2	5.8374		1.3	108.94	1.3	46.1753	1.3	16.0678
1.3	32.8201	1.3	14.6164	1.3	5.8374		1.4	123.38	1.4	50.8017	1.4	16.1141
1.4	36.0803	1.4	15.2194	1.4	5.8374		1.5	139.07	1.5	55.6746	1.5	16.287
1.5	40.3663	1.5	16.7142	1.5	5.8374		1.6	154.975	1.6	60.5153	1.6	16.6526
1.6	45.0626	1.6	18.1482	1.6	5.8457		1.7	169.976	1.7	65.3918	1.7	17.0026
1.7	49.4599	1.7	19.5266	1.7	5.85779		1.8	184.932	1.8	70.1252	1.8	17.5996
1.8	54.1717	1.8	20.7439	1.8	6.2144		1.9	199.518	1.9	74.6334	1.9	17.9839
1.9	58.6587	1.9	22.1897	1.9	6.34239		2	213.662	2	78.7835	2	18.6255
2	63.3032	2	23.3775	2	6.6504		2.1	227.252	2.1	83.0059	2.1	18.9776
2.1	67.7443	2.1	24.7074	2.1	6.8219		2.2	240.229	2.2	87.1804	2.2	19.3875
2.2	72.3332	2.2	25.8328	2.2	6.92889		2.3	253.031	2.3	91.3837	2.3	19.9908
2.3	76.7979	2.3	27.1805	2.3	7.1752		2.4	265.339	2.4	95.2549	2.4	20.4447
2.4	81.3161	2.4	28.3404	2.4	7.42019		2.5	276.962	2.5	99.1153	2.5	20.8664
2.5	85.6529	2.5	29.4721	2.5	7.6758		2.6	288.351	2.6	102.721	2.6	21.2842
2.6	90.0558	2.6	30.5655	2.6	7.875		2.7	299.21	2.7	106.431	2.7	21.8201
2.7	94.21	2.7	31.6789	2.7	8.12659		2.8	309.721	2.8	109.789	2.8	22.1758
2.8	98.635	2.8	32.7746	2.8	8.2369		2.9	319.941	2.9	113.206	2.9	22.6372
2.9	102.906	2.9	33.9375	2.9	8.4741		3	329.656	3	116.694	3	22.9995
3	107.152	3	35.042	3	8.6145		3.1	339.033	3.1	120.109	3.1	23.3247
3.1	111.332	3.1	36.1103	3.1	8.7735		3.2	348.13	3.2	123.529	3.2	23.7629
3.2	115.57	3.2	37.1716	3.2	8.9901		3.3	356.936	3.3	126.796	3.3	24.2219
3.3	119.697	3.3	38.1661	3.3	9.2115		3.4	365.379	3.4	129.917	3.4	24.5736
3.4	123.759	3.4	39.1596	3.4	9.3864		3.5	373.509	3.5	133.018	3.5	24.927
3.5	127.751	3.5	40.1338	3.5	9.5255		3.6	381.412	3.6	136.076	3.6	25.3428
3.6	131.757	3.6	41.0684	3.6	9.6745		3.7	389.089	3.7	139.084	3.7	25.7086
3.7	135.697	3.7	42.0393	3.7	9.8448		3.8	396.342	3.8	142.062	3.8	26.0554
3.8	139.639	3.8	42.9883	3.8	10.0048		3.9	403.506	3.9	144.986	3.9	26.4136
3.9	143.507	3.9	43.9331	3.9	10.1362		4	410.57	4	147.875	4	26.7603
4	147.422	4	44.847	4	10.2772		4.1	417.254	4.1	150.708	4.1	27.1506
4.1	151.252	4.1	45.774	4.1	10.4274		4.2	423.648	4.2	153.452	4.2	27.5051
4.2	154.99	4.2	46.6744	4.2	10.5691		4.3	430.038	4.3	156.246	4.3	27.8502
4.3	158.781	4.3	47.565	4.3	10.6875		4.4	436.137	4.4	158.963	4.4	28.2069
4.4	162.474	4.4	48.4475	4.4	10.8092		4.5	442.191	4.5	161.717	4.5	28.5362
4.5	166.166	4.5	49.3087	4.5	10.9463		4.6	447.958	4.6	164.337	4.6	28.8814
4.6	169.83	4.6	50.1844	4.6	11.085		4.7	453.602	4.7	167.034	4.7	29.2361
4.7	173.465	4.7	51.0484	4.7	11.2188		4.8	459.095	4.8	169.573	4.8	29.5556
4.8	177.086	4.8	51.8988	4.8	11.3382		4.9	464.562	4.9	172.134	4.9	29.9082
4.9	180.686	4.9	52.7454	4.9	11.4767		5	469.698	5	174.678	5	30.2527
5	184.195	5	53.5856	5	11.6073		5.1	474.79	5.1	177.171	5.1	30.5738
5.1	187.732	5.1	54.4067	5.1	11.7301		5.2	479.722	5.2	179.591	5.2	30.8827
5.2	191.151	5.2	55.2175	5.2	11.863		5.3	484.565	5.3	182.006	5.3	31.2006
5.3	194.574	5.3	56.0232	5.3	11.9841		5.4	489.327	5.4	184.439	5.4	31.5105
5.4	197.974	5.4	56.8213	5.4	12.1045		5.5	493.953	5.5	186.878	5.5	31.823
5.5	201.336	5.5	57.6103	5.5	12.2257		5.6	498.458	5.6	189.297	5.6	32.1264
5.6	204.659	5.6	58.3846	5.6	12.3456		5.7	502.843	5.7	191.623	5.7	32.4415
5.7	207.961	5.7	59.1618	5.7	12.4672		5.8	507.124	5.8	193.974	5.8	32.7491
5.8	211.231	5.8	59.9243	5.8	12.579		5.9	511.286	5.9	196.253	5.9	33.0523
5.9	214.458	5.9	60.6793	5.9	12.6931		6	515.332	6	198.595	6	33.3458
6	217.66	6	61.4318	6	12.8028		6.1	519.397	6.1	200.865	6.1	33.6322
6.1	220.828	6.1	62.1626	6.1	12.9074		6.2	523.373	6.2	203.036	6.2	33.9267
6.2	223.969	6.2	62.8846	6.2	13.0154		6.3	527.267	6.3	205.183	6.3	34.2273
6.3	227.07	6.3	63.6125	6.3	13.1219		6.4	531	6.4	207.316	6.4	34.5225
6.4	230.128	6.4	64.3313	6.4	13.2331		6.5	534.646	6.5	209.459	6.5	34.8028
6.5	233.163	6.5	65.0456	6.5	13.3359		6.6	538.178	6.6	211.596	6.6	35.0834
6.6	236.16	6.6	65.7613	6.6	13.4376		6.7	541.698	6.7	213.719	6.7	35.3639
6.7	239.124	6.7	66.4729	6.7	13.5419		6.8	545.178	6.8	215.813	6.8	35.6408
6.8	242.068	6.8	67.1818	6.8	13.6442		6.9	548.623	6.9	217.892	6.9	35.9047
6.9	244.931	6.9	67.8916	6.9	13.7468		7	552.026	7	219.958	7	36.1722
7	247.804	7	68.5912	7	13.8419		7.1	555.364	7.1	222.02	7.1	36.434
7.1	250.698	7.1	69.2838	7.1	13.9424		7.2	558.602	7.2	224.077	7.2	36.7057
7.2	253.513	7.2	69.9866	7.2	14.0432		7.3	561.712	7.3	226.099	7.3	36.9781
7.3	256.35	7.3	70.6773	7.3	14.1476		7.4	564.817	7.4	228.107	7.4	37.236
7.4	259.127	7.4	71.3677	7.4	14.253		7.5	567.884	7.5	230.105	7.5	37.4906
7.5	261.875	7.5	72.0415	7.5	14.3462		7.6	570.845	7.6	232.102	7.6	37.7314
7.6	264.598	7.6	72.7163	7.6	14.4412		7.7	573.858	7.7	234.079	7.7	37.9839
7.7	267.299	7.7	73.3816	7.7	14.5356		7.8	576.743	7.8	236.036	7.8	38.2396
7.8	269.98	7.8	74.0451	7.8	14.628		7.9	579.674	7.9	237.975	7.9	38.4882
7.9	272.615	7.9	74.7005	7.9	14.7215		8	582.463	8	239.888	8	38.7493
8	275.174	8	75.347	8	14.8237		8.1	585.299	8.1	241.793	8.1	39.0054
8.1	277.745	8.1	75.9908	8.1	14.9237		8.2	588.024	8.2	243.689	8.2	39.2535
8.2	280.337	8.2	76.6218	8.2	15.0215		8.3	590.752	8.3	245.577	8.3	39.4988
8.3	282.844	8.3	77.2598	8.3	15.1136		8.4	593.446	8.4	247.464	8.4	39.7435
8.4	285.394	8.4	77.899	8.4	15.2093		8.5	596.112	8.5	249.342	8.5	39.996
8.5	287.857	8.5	78.5287	8.5	15.3093		8.6	598.728	8.6	251.201	8.6	40.248
8.6	290.265	8.6	79.1679	8.6	15.4059		8.7	601.323	8.7	253.03	8.7	40.4961
8.7	292.66	8.7	79.7837	8.7	15.4985		8.8	603.89	8.8	254.848	8.8	40.7348
8.8	295.074	8.8	80.403	8.8	15.5919		8.9	606.411	8.9	256.676	8.9	40.9757
8.9	297.47	8.9	81.0298	8.9	15.683		9	608.875	9	258.484	9	41.2216
9	299.846	9	81.6455	9	15.7765		9.1	611.379	9.1	260.277	9.1	41.4566
9.1	302.195	9.1	82.2605	9.1	15.8714		9.2	613.774	9.2	262.065	9.2	41.6779
9.2	304.516	9.2	82.8785	9.2	15.9594		9.3	616.179	9.3	263.839	9.3	41.9036
9.3	306.824	9.3	83.4915	9.3	16.049		9.4	618.571	9.4	265.6	9.4	42.1417
9.4	309.156	9.4	84.0919	9.4	16.1433		9.5	620.969	9.5	267.342	9.5	42.3802
9.5	311.477	9.5	84.6788	9.5	16.2309		9.6	623.284	9.6	269.075	9.6	42.6141
9.6	313.695	9.6	85.2772	9.6	16.3193		9.7	625.557	9.7	270.815	9.7	42.8466
9.7	315.939	9.7	85.8827	9.7	16.4067		9.8	627.856	9.8	272.548	9.8	43.0799
9.8	318.098	9.8	86.4832	9.8	16.4897		9.9	630.13	9.9	274.261	9.9	43.3165
9.9	320.239	9.9	87.076	9.9	16.5792		10	632.378	10	275.964	10	43.5431
10	322.392	10	87.6657	10	16.6678		10.1	634.615	10.1	277.661	10.1	43.7639
10.1	324.53	10.1	88.2367	10.1	16.7507		10.2	636.867	10.2	279.355	10.2	43.9854
10.2	326.644	10.2	88.8083	10.2	16.8302		10.3	639.057	10.3	281.031	10.3	44.2141
10.3	328.74	10.3	89.3754	10.3	16.9029		10.4	641.219	10.4	282.696	10.4	44.4419
10.4	330.82	10.4	89.9352	10.4	16.9828		10.5	643.357	10.5	284.353	10.5	44.6611
10.5	332.875	10.5	90.4884	10.5	17.0673		10.6	645.48	10.6	285.994	10.6	44.8639
10.6	334.907	10.6	91.0378	10.6	17.1471		10.7	647.549	10.7	287.632	10.7	45.074
10.7	336.925	10.7	91.5821	10.7	17.2301		10.8	649.644	10.8	289.258	10.8	45.2887
10.8	338.927	10.8	92.1283	10.8	17.3067		10.9	651.706	10.9	290.868	10.9	45.5012
10.9	340.901	10.9	92.6677	10.9	17.3821		11	653.754	11	292.473	11	45.7184
11	342.868	11	93.2092	11	17.4629		11.1	655.791	11.1	294.068	11.1	45.9309
11.1	344.818	11.1	93.7522	11.1	17.5439		11.2	657.811	11.2	295.646	11.2	46.1432
11.2	346.758	11.2	94.2935	11.2	17.6247		11.3	659.808	11.3	297.213	11.3	46.3499
11.3	348.676	11.3	94.8285	11.3	17.7044		11.4	661.797	11.4	298.785	11.4	46.5557
11.4	350.576	11.4	95.3647	11.4	17.7779		11.5	663.774	11.5	300.351	11.5	46.7616
11.5	352.452	11.5	95.8984	11.5	17.8573		11.6	665.736	11.6	301.895	11.6	46.9713
11.6	354.317	11.6	96.4257	11.6	17.9361		11.7	667.688	11.7	303.428	11.7	47.1864
11.7	356.18	11.7	96.9586	11.7	18.0119		11.8	669.608	11.8	304.953	11.8	47.3964
11.8	358.022	11.8	97.4833	11.8	18.0841		11.9	671.519	11.9	306.475	11.9	47.6051
11.9	359.849	11.9	98.0023	11.9	18.1581		12	673.427	12	307.99	12	47.8011
12	361.665	12	98.5161	12	18.2336		12.1	675.32	12.1	309.506	12.1	47.9993
12.1	363.464	12.1	99.037	12.1	18.3092		12.2	677.207	12.2	311.018	12.2	48.1944
12.2	365.246	12.2	99.5549	12.2	18.3848		12.3	679.076	12.3	312.521	12.3	48.3949
12.3	367.018	12.3	100.065	12.3	18.4592		12.4	680.928	12.4	314.02	12.4	48.5956
12.4	368.772	12.4	100.574	12.4	18.5334		12.5	682.776	12.5	315.514	12.5	48.7862
12.5	370.506	12.5	101.084	12.5	18.6034		12.6	684.622	12.6	316.996	12.6	48.9865
12.6	372.234	12.6	101.587	12.6	18.679		12.7	686.454	12.7	318.467	12.7	49.187
12.7	373.954	12.7	102.09	12.7	18.7534		12.8	688.279	12.8	319.941	12.8	49.3787
12.8	375.646	12.8	102.58	12.8	18.8256		12.9	690.091	12.9	321.414	12.9	49.5685
12.9	377.324	12.9	103.066	12.9	18.8941		13	691.885	13	322.879	13	49.7607
13	378.999	13	103.557	13	18.963		13.1	693.673	13.1	324.341	13.1	49.965
13.1	380.663	13.1	104.049	13.1	19.035		13.2	695.458	13.2	325.788	13.2	50.1686
13.2	382.315	13.2	104.538	13.2	19.1065		13.3	697.226	13.3	327.212	13.3	50.3535
13.3	383.949	13.3	105.018	13.3	19.1749		13.4	698.981	13.4	328.632	13.4	50.5417
13.4	385.558	13.4	105.499	13.4	19.2403		13.5	700.738	13.5	330.05	13.5	50.7383
13.5	387.164	13.5	105.976	13.5	19.3122		13.6	702.483	13.6	331.458	13.6	50.9225
13.6	388.765	13.6	106.452	13.6	19.38		13.7	704.207	13.7	332.866	13.7	51.1131
13.7	390.344	13.7	106.928	13.7	19.4458		13.8	705.915	13.8	334.279	13.8	51.2919
13.8	391.913	13.8	107.401	13.8	19.5081		13.9	707.61	13.9	335.672	13.9	51.4692
13.9	393.468	13.9	107.872	13.9	19.5766		14	709.302	14	337.058	14	51.6588
14	395.013	14	108.335	14	19.6473		14.1	710.995	14.1	338.443	14.1	51.8517
14.1	396.542	14.1	108.799	14.1	19.714		14.2	712.68	14.2	339.815	14.2	52.0394
14.2	398.066	14.2	109.259	14.2	19.7806		14.3	714.35	14.3	341.195	14.3	52.2188
14.3	399.571	14.3	109.716	14.3	19.851		14.4	716.009	14.4	342.576	14.4	52.4033
14.4	401.072	14.4	110.165	14.4	19.9219		14.5	717.663	14.5	343.947	14.5	52.5894
14.5	402.568	14.5	110.612	14.5	19.9875		14.6	719.313	14.6	345.301	14.6	52.7758
14.6	404.05	14.6	111.073	14.6	20.0541		14.7	720.955	14.7	346.652	14.7	52.9537
14.7	405.524	14.7	111.528	14.7	20.1229		14.8	722.591	14.8	348.004	14.8	53.1238
14.8	406.985	14.8	111.977	14.8	20.1864		14.9	724.219	14.9	349.348	14.9	53.296
14.9	408.432	14.9	112.438	14.9	20.2545		15	725.845	15	350.688	15	53.4662
15	409.876	15	112.901	15	20.3169		15.1	727.456	15.1	352.015	15.1	53.6343
15.1	411.304	15.1	113.356	15.1	20.3786		15.2	729.058	15.2	353.334	15.2	53.8123
15.2	412.73	15.2	113.805	15.2	20.4431		15.3	730.641	15.3	354.66	15.3	53.9904
15.3	414.134	15.3	114.26	15.3	20.5068		15.4	732.221	15.4	355.976	15.4	54.1619
15.4	415.528	15.4	114.706	15.4	20.5644		15.5	733.808	15.5	357.278	15.5	54.3275
15.5	416.918	15.5	115.159	15.5	20.6287		15.6	735.389	15.6	358.595	15.6	54.4961
15.6	418.306	15.6	115.609	15.6	20.6911		15.7	736.955	15.7	359.912	15.7	54.6697
15.7	419.682	15.7	116.047	15.7	20.7551		15.8	738.51	15.8	361.221	15.8	54.8416
15.8	421.049	15.8	116.491	15.8	20.8213		15.9	740.059	15.9	362.521	15.9	55.009
15.9	422.411	15.9	116.947	15.9	20.8798		16	741.602	16	363.812	16	55.1748
16	423.758	16	117.394	16	20.9445		16.1	743.148	16.1	365.098	16.1	55.3493
16.1	425.099	16.1	117.831	16.1	21.0087		16.2	744.69	16.2	366.388	16.2	55.5197
16.2	426.424	16.2	118.261	16.2	21.0681		16.3	746.227	16.3	367.677	16.3	55.6837
16.3	427.741	16.3	118.695	16.3	21.1285		16.4	747.764	16.4	368.951	16.4	55.8599
16.4	429.056	16.4	119.133	16.4	21.1903		16.5	749.288	16.5	370.221	16.5	56.0393
16.5	430.367	16.5	119.568	16.5	21.2527		16.6	750.802	16.6	371.503	16.6	56.2081
16.6	431.673	16.6	120.006	16.6	21.3129		16.7	752.325	16.7	372.779	16.7	56.3752
16.7	432.97	16.7	120.441	16.7	21.3745		16.8	753.828	16.8	374.039	16.8	56.5397
16.8	434.244	16.8	120.877	16.8	21.4372		16.9	755.322	16.9	375.288	16.9	56.7039
16.9	435.508	16.9	121.305	16.9	21.4992		17	756.815	17	376.532	17	56.8698
17	436.771	17	121.717	17	21.5638		17.1	758.311	17.1	377.784	17.1	57.0294
17.1	438.034	17.1	122.133	17.1	21.6248		17.2	759.79	17.2	379.038	17.2	57.1883
17.2	439.287	17.2	122.551	17.2	21.6861		17.3	761.256	17.3	380.283	17.3	57.3488
17.3	440.539	17.3	122.98	17.3	21.7467		17.4	762.725	17.4	381.511	17.4	57.5216
17.4	441.787	17.4	123.396	17.4	21.8065		17.5	764.193	17.5	382.747	17.5	57.6926
17.5	443.012	17.5	123.811	17.5	21.8711		17.6	765.659	17.6	383.985	17.6	57.8576
17.6	444.23	17.6	124.229	17.6	21.9321		17.7	767.117	17.7	385.206	17.7	58.0154
17.7	445.445	17.7	124.635	17.7	21.9893		17.8	768.559	17.8	386.421	17.8	58.1721
17.8	446.641	17.8	125.041	17.8	22.044		17.9	770.005	17.9	387.634	17.9	58.3317
17.9	447.837	17.9	125.451	17.9	22.1067		18	771.443	18	388.842	18	58.4872
18	449.037	18	125.857	18	22.1634		18.1	772.871	18.1	390.052	18.1	58.636
18.1	450.227	18.1	126.264	18.1	22.2197		18.2	774.297	18.2	391.26	18.2	58.7771
18.2	451.397	18.2	126.668	18.2	22.2728		18.3	775.716	18.3	392.453	18.3	58.9296
18.3	452.553	18.3	127.072	18.3	22.3278		18.4	777.137	18.4	393.64	18.4	59.0849
18.4	453.7	18.4	127.464	18.4	22.3856		18.5	778.547	18.5	394.84	18.5	59.2393
18.5	454.843	18.5	127.865	18.5	22.4399		18.6	779.946	18.6	396.028	18.6	59.3933
18.6	455.994	18.6	128.264	18.6	22.496		18.7	781.341	18.7	397.205	18.7	59.5413
18.7	457.13	18.7	128.656	18.7	22.5511		18.8	782.736	18.8	398.377	18.8	59.6901
18.8	458.251	18.8	129.054	18.8	22.6063		18.9	784.13	18.9	399.543	18.9	59.8379
18.9	459.377	18.9	129.456	18.9	22.6609		19	785.52	19	400.708	19	59.9855
19	460.5	19	129.855	19	22.7158		19.1	786.903	19.1	401.874	19.1	60.1311
19.1	461.606	19.1	130.247	19.1	22.7729		19.2	788.272	19.2	403.029	19.2	60.2765
19.2	462.707	19.2	130.644	19.2	22.8317		19.3	789.639	19.3	404.187	19.3	60.4332
19.3	463.802	19.3	131.04	19.3	22.8871		19.4	791.001	19.4	405.352	19.4	60.5887
19.4	464.888	19.4	131.429	19.4	22.9462		19.5	792.362	19.5	406.51	19.5	60.7402
19.5	465.975	19.5	131.822	19.5	23.0062		19.6	793.717	19.6	407.658	19.6	60.8857
19.6	467.061	19.6	132.207	19.6	23.0572		19.7	795.066	19.7	408.805	19.7	61.0405
19.7	468.139	19.7	132.59	19.7	23.1101		19.8	796.405	19.8	409.954	19.8	61.2002
19.8	469.206	19.8	132.974	19.8	23.1673		19.9	797.741	19.9	411.099	19.9	61.3521
19.9	470.265	19.9	133.352	19.9	23.2259		20	799.069	20	412.245	20	61.4957
20	471.325	20	133.726	20	23.2771		20.1	800.388	20.1	413.391	20.1	61.6356
20.1	472.379	20.1	134.11	20.1	23.3275		20.2	801.715	20.2	414.52	20.2	61.7818
20.2	473.439	20.2	134.49	20.2	23.3803		20.3	803.054	20.3	415.664	20.3	61.9376
20.3	474.495	20.3	134.867	20.3	23.4352		20.4	804.378	20.4	416.799	20.4	62.0885
20.4	475.532	20.4	135.248	20.4	23.4909		20.5	805.694	20.5	417.919	20.5	62.2298
20.5	476.571	20.5	135.624	20.5	23.5457		20.6	807.016	20.6	419.034	20.6	62.373
20.6	477.608	20.6	135.995	20.6	23.6039		20.7	808.339	20.7	420.143	20.7	62.5123
20.7	478.63	20.7	136.366	20.7	23.6586		20.8	809.657	20.8	421.257	20.8	62.6578
20.8	479.643	20.8	136.744	20.8	23.7119		20.9	810.972	20.9	422.361	20.9	62.8038
20.9	480.661	20.9	137.127	20.9	23.7693		21	812.284	21	423.468	21	62.9449
21	481.687	21	137.501	21	23.8198		21.1	813.591	21.1	424.577	21.1	63.0849
21.1	482.687	21.1	137.872	21.1	23.8702		21.2	814.898	21.2	425.681	21.2	63.2342
21.2	483.678	21.2	138.246	21.2	23.9252		21.3	816.189	21.3	426.785	21.3	63.371
21.3	484.655	21.3	138.619	21.3	23.974		21.4	817.464	21.4	427.88	21.4	63.5041
21.4	485.629	21.4	138.989	21.4	24.0251		21.5	818.744	21.5	428.969	21.5	63.6377
21.5	486.605	21.5	139.361	21.5	24.0787		21.6	820.021	21.6	430.057	21.6	63.7722
21.6	487.572	21.6	139.732	21.6	24.1264		21.7	821.281	21.7	431.145	21.7	63.9071
21.7	488.525	21.7	140.1	21.7	24.1745		21.8	822.542	21.8	432.241	21.8	64.0508
21.8	489.48	21.8	140.465	21.8	24.2226		21.9	823.8	21.9	433.328	21.9	64.1895
21.9	490.432	21.9	140.818	21.9	24.2758		22	825.052	22	434.407	22	64.3224
22	491.377	22	141.166	22	24.3313		22.1	826.298	22.1	435.469	22.1	64.46
22.1	492.323	22.1	141.525	22.1	24.3824		22.2	827.539	22.2	436.532	22.2	64.5857
22.2	493.273	22.2	141.885	22.2	24.4316		22.3	828.777	22.3	437.591	22.3	64.7176
22.3	494.22	22.3	142.239	22.3	24.485		22.4	830.017	22.4	438.659	22.4	64.8569
22.4	495.165	22.4	142.602	22.4	24.5381		22.5	831.262	22.5	439.718	22.5	64.9927
22.5	496.095	22.5	142.955	22.5	24.5936		22.6	832.498	22.6	440.777	22.6	65.1184
22.6	497.033	22.6	143.308	22.6	24.6466		22.7	833.72	22.7	441.825	22.7	65.2425
22.7	497.973	22.7	143.66	22.7	24.6977		22.8	834.937	22.8	442.871	22.8	65.3689
22.8	498.904	22.8	144.02	22.8	24.7499		22.9	836.153	22.9	443.917	22.9	65.4987
22.9	499.82	22.9	144.383	22.9	24.8008		23	837.373	23	444.97	23	65.6271
23	500.734	23	144.741	23	24.8495		23.1	838.596	23.1	446.017	23.1	65.7489
23.1	501.643	23.1	145.098	23.1	24.8966		23.2	839.814	23.2	447.056	23.2	65.8749
23.2	502.54	23.2	145.444	23.2	24.9447		23.3	841.029	23.3	448.092	23.3	66.0016
23.3	503.438	23.3	145.794	23.3	24.9911		23.4	842.233	23.4	449.14	23.4	66.1299
23.4	504.335	23.4	146.147	23.4	25.0369		23.5	843.428	23.5	450.18	23.5	66.2584
23.5	505.225	23.5	146.49	23.5	25.0816		23.6	844.615	23.6	451.206	23.6	66.3863
23.6	506.116	23.6	146.835	23.6	25.1306		23.7	845.8	23.7	452.228	23.7	66.5099
23.7	506.984	23.7	147.173	23.7	25.1811		23.8	846.985	23.8	453.251	23.8	66.6398
23.8	507.839	23.8	147.504	23.8	25.2297		23.9	848.165	23.9	454.275	23.9	66.7732
23.9	508.694	23.9	147.84	23.9	25.2801		24	849.344	24	455.299	24	66.8934
24	509.55	24	148.177	24	25.3237		24.1	850.509	24.1	456.312	24.1	67.0186
24.1	510.412	24.1	148.516	24.1	25.3747		24.2	851.672	24.2	457.311	24.2	67.137
24.2	511.269	24.2	148.851	24.2	25.4241		24.3	852.834	24.3	458.328	24.3	67.2631
24.3	512.117	24.3	149.19	24.3	25.4772		24.4	854	24.4	459.336	24.4	67.3875
24.4	512.967	24.4	149.527	24.4	25.5318		24.5	855.159	24.5	460.323	24.5	67.5053
24.5	513.801	24.5	149.867	24.5	25.5813		24.6	856.318	24.6	461.311	24.6	67.6299
24.6	514.633	24.6	150.208	24.6	25.6306		24.7	857.475	24.7	462.304	24.7	67.7557
24.7	515.462	24.7	150.542	24.7	25.6799		24.8	858.634	24.8	463.295	24.8	67.8804
24.8	516.309	24.8	150.882	24.8	25.7301		24.9	859.785	24.9	464.281	24.9	68.0017
24.9	517.156	24.9	151.222	24.9	25.7815		25	860.928	25	465.256	25	68.1261
25	517.991	25	151.559	25	25.8362		25.1	862.068	25.1	466.222	25.1	68.2493
25.1	518.816	25.1	151.887	25.1	25.8818		25.2	863.203	25.2	467.196	25.2	68.3712
25.2	519.64	25.2	152.224	25.2	25.9296		25.3	864.333	25.3	468.18	25.3	68.4953
25.3	520.457	25.3	152.559	25.3	25.981		25.4	865.452	25.4	469.159	25.4	68.6172
25.4	521.266	25.4	152.895	25.4	26.0313		25.5	866.573	25.5	470.137	25.5	68.7413
25.5	522.078	25.5	153.234	25.5	26.0788		25.6	867.698	25.6	471.114	25.6	68.8606
25.6	522.894	25.6	153.571	25.6	26.1275		25.7	868.821	25.7	472.086	25.7	68.9782
25.7	523.705	25.7	153.906	25.7	26.1776		25.8	869.935	25.8	473.063	25.8	69.0986
25.8	524.51	25.8	154.239	25.8	26.2277		25.9	871.049	25.9	474.035	25.9	69.2202
25.9	525.307	25.9	154.573	25.9	26.2781		26	872.166	26	475.006	26	69.3365
26	526.096	26	154.908	26	26.3235		26.1	873.288	26.1	475.975	26.1	69.4541
26.1	526.882	26.1	155.241	26.1	26.369		26.2	874.407	26.2	476.944	26.2	69.5722
26.2	527.678	26.2	155.568	26.2	26.4155		26.3	875.522	26.3	477.905	26.3	69.6959
26.3	528.463	26.3	155.89	26.3	26.464		26.4	876.636	26.4	478.859	26.4	69.813
26.4	529.248	26.4	156.223	26.4	26.5013		26.5	877.757	26.5	479.819	26.5	69.9342
26.5	530.047	26.5	156.549	26.5	26.5469		26.6	878.864	26.6	480.789	26.6	70.0508
26.6	530.837	26.6	156.871	26.6	26.5895		26.7	879.966	26.7	481.759	26.7	70.1629
26.7	531.619	26.7	157.195	26.7	26.6352		26.8	881.07	26.8	482.723	26.8	70.2762
26.8	532.402	26.8	157.521	26.8	26.682		26.9	882.172	26.9	483.677	26.9	70.3868
26.9	533.188	26.9	157.849	26.9	26.7283		27	883.27	27	484.627	27	70.4981
27	533.967	27	158.173	27	26.7722		27.1	884.351	27.1	485.579	27.1	70.6116
27.1	534.743	27.1	158.481	27.1	26.8128		27.2	885.419	27.2	486.527	27.2	70.7262
27.2	535.517	27.2	158.795	27.2	26.8619		27.3	886.488	27.3	487.468	27.3	70.8387
27.3	536.288	27.3	159.116	27.3	26.9084		27.4	887.563	27.4	488.411	27.4	70.9492
27.4	537.055	27.4	159.434	27.4	26.9549		27.5	888.629	27.5	489.349	27.5	71.0618
27.5	537.816	27.5	159.753	27.5	27.0055		27.6	889.69	27.6	490.274	27.6	71.1751
27.6	538.569	27.6	160.068	27.6	27.0519		27.7	890.749	27.7	491.195	27.7	71.2849
27.7	539.315	27.7	160.394	27.7	27.101		27.8	891.813	27.8	492.111	27.8	71.3962
27.8	540.066	27.8	160.709	27.8	27.153		27.9	892.868	27.9	493.035	27.9	71.5067
27.9	540.804	27.9	161.02	27.9	27.2012		28	893.924	28	493.961	28	71.6163
28	541.547	28	161.343	28	27.2438		28.1	894.982	28.1	494.886	28.1	71.7248
28.1	542.29	28.1	161.664	28.1	27.2885		28.2	896.044	28.2	495.81	28.2	71.8305
28.2	543.031	28.2	161.995	28.2	27.3306		28.3	897.113	28.3	496.733	28.3	71.9355
28.3	543.768	28.3	162.322	28.3	27.3727		28.4	898.177	28.4	497.658	28.4	72.0459
28.4	544.495	28.4	162.644	28.4	27.419		28.5	899.231	28.5	498.586	28.5	72.1606
28.5	545.218	28.5	162.968	28.5	27.4704		28.6	900.283	28.6	499.513	28.6	72.2703
28.6	545.949	28.6	163.281	28.6	27.5145		28.7	901.342	28.7	500.435	28.7	72.3745
28.7	546.68	28.7	163.591	28.7	27.5585		28.8	902.39	28.8	501.367	28.8	72.4829
28.8	547.409	28.8	163.91	28.8	27.6008		28.9	903.429	28.9	502.288	28.9	72.5928
28.9	548.133	28.9	164.225	28.9	27.6386		29	904.479	29	503.202	29	72.7034
29	548.86	29	164.538	29	27.6816		29.1	905.518	29.1	504.114	29.1	72.8142
29.1	549.583	29.1	164.839	29.1	27.7254		29.2	906.547	29.2	505.024	29.2	72.923
29.2	550.303	29.2	165.143	29.2	27.7692		29.3	907.58	29.3	505.928	29.3	73.029
29.3	551.012	29.3	165.458	29.3	27.8061		29.4	908.603	29.4	506.829	29.4	73.1384
29.4	551.716	29.4	165.771	29.4	27.8483		29.5	909.613	29.5	507.726	29.5	73.2468
29.5	552.422	29.5	166.082	29.5	27.8931		29.6	910.624	29.6	508.623	29.6	73.3542
29.6	553.137	29.6	166.39	29.6	27.9377		29.7	911.636	29.7	509.513	29.7	73.4635
29.7	553.841	29.7	166.696	29.7	27.9803		29.8	912.638	29.8	510.405	29.8	73.5693
29.8	554.547	29.8	167.007	29.8	28.0205		29.9	913.645	29.9	511.292	29.9	73.6748
29.9	555.245	29.9	167.318	29.9	28.0652		30	914.639	30	512.18	30	73.7747
30	555.937	30	167.63	30	28.1097		30.1	915.625	30.1	513.067	30.1	73.8756
30.1	556.627	30.1	167.944	30.1	28.1476		30.2	916.622	30.2	513.951	30.2	73.9778
30.2	557.312	30.2	168.261	30.2	28.1872		30.3	917.615	30.3	514.827	30.3	74.0788
30.3	557.997	30.3	168.569	30.3	28.23		30.4	918.612	30.4	515.706	30.4	74.1779
30.4	558.69	30.4	168.876	30.4	28.2674		30.5	919.603	30.5	516.593	30.5	74.2713
30.5	559.376	30.5	169.185	30.5	28.3037		30.6	920.593	30.6	517.475	30.6	74.3716
30.6	560.058	30.6	169.486	30.6	28.3466		30.7	921.579	30.7	518.355	30.7	74.4664
30.7	560.735	30.7	169.794	30.7	28.387		30.8	922.565	30.8	519.235	30.8	74.5647
30.8	561.415	30.8	170.101	30.8	28.431		30.9	923.554	30.9	520.115	30.9	74.6664
30.9	562.085	30.9	170.408	30.9	28.4718		31	924.533	31	520.997	31	74.7634
31	562.752	31	170.719	31	28.5117		31.1	925.512	31.1	521.86	31.1	74.8588
31.1	563.423	31.1	171.02	31.1	28.5491		31.2	926.486	31.2	522.717	31.2	74.96
31.2	564.094	31.2	171.323	31.2	28.5935		31.3	927.453	31.3	523.581	31.3	75.0533
31.3	564.766	31.3	171.639	31.3	28.6357		31.4	928.417	31.4	524.455	31.4	75.1493
31.4	565.435	31.4	171.935	31.4	28.6766		31.5	929.38	31.5	525.32	31.5	75.2411
31.5	566.096	31.5	172.225	31.5	28.7166		31.6	930.335	31.6	526.182	31.6	75.3345
31.6	566.761	31.6	172.519	31.6	28.7532		31.7	931.294	31.7	527.039	31.7	75.4302
31.7	567.43	31.7	172.812	31.7	28.7918		31.8	932.26	31.8	527.892	31.8	75.5266
31.8	568.095	31.8	173.112	31.8	28.8347		31.9	933.224	31.9	528.735	31.9	75.6254
31.9	568.747	31.9	173.409	31.9	28.8727		32	934.185	32	529.587	32	75.7284
32	569.407	32	173.7	32	28.9122		32.1	935.147	32.1	530.439	32.1	75.8288
32.1	570.064	32.1	173.993	32.1	28.9524		32.2	936.109	32.2	531.293	32.2	75.9299
32.2	570.717	32.2	174.293	32.2	28.9946		32.3	937.068	32.3	532.151	32.3	76.0256
32.3	571.372	32.3	174.583	32.3	29.0339		32.4	938.019	32.4	533.002	32.4	76.1158
32.4	572.029	32.4	174.874	32.4	29.0682		32.5	938.965	32.5	533.839	32.5	76.2114
32.5	572.676	32.5	175.169	32.5	29.1095		32.6	939.903	32.6	534.678	32.6	76.3042
32.6	573.32	32.6	175.47	32.6	29.1465		32.7	940.837	32.7	535.509	32.7	76.3996
32.7	573.962	32.7	175.768	32.7	29.1855		32.8	941.765	32.8	536.343	32.8	76.4942
32.8	574.597	32.8	176.059	32.8	29.2262		32.9	942.685	32.9	537.178	32.9	76.5851
32.9	575.226	32.9	176.35	32.9	29.2649		33	943.611	33	538.009	33	76.6744
33	575.876	33	176.647	33	29.3034		33.1	944.535	33.1	538.841	33.1	76.7733
33.1	576.534	33.1	176.948	33.1	29.3423		33.2	945.456	33.2	539.668	33.2	76.8727
33.2	577.168	33.2	177.241	33.2	29.3803		33.3	946.38	33.3	540.505	33.3	76.9709
33.3	577.799	33.3	177.525	33.3	29.4159		33.4	947.296	33.4	541.33	33.4	77.0579
33.4	578.429	33.4	177.818	33.4	29.4526		33.5	948.2	33.5	542.152	33.5	77.1528
33.5	579.053	33.5	178.115	33.5	29.494		33.6	949.104	33.6	542.981	33.6	77.2473
33.6	579.673	33.6	178.408	33.6	29.5332		33.7	950.013	33.7	543.807	33.7	77.3439
33.7	580.295	33.7	178.7	33.7	29.5714		33.8	950.926	33.8	544.627	33.8	77.4393
33.8	580.917	33.8	178.98	33.8	29.6102		33.9	951.844	33.9	545.447	33.9	77.533
33.9	581.535	33.9	179.272	33.9	29.6463		34	952.756	34	546.253	34	77.629
34	582.159	34	179.553	34	29.6845		34.1	953.657	34.1	547.065	34.1	77.7258
34.1	582.77	34.1	179.834	34.1	29.7248		34.2	954.544	34.2	547.875	34.2	77.8205
34.2	583.367	34.2	180.123	34.2	29.7663		34.3	955.435	34.3	548.673	34.3	77.9094
34.3	583.966	34.3	180.417	34.3	29.8073		34.4	956.317	34.4	549.477	34.4	77.9959
34.4	584.567	34.4	180.71	34.4	29.8453		34.5	957.197	34.5	550.284	34.5	78.0792
34.5	585.173	34.5	180.998	34.5	29.8831		34.6	958.085	34.6	551.082	34.6	78.1676
34.6	585.788	34.6	181.272	34.6	29.9162		34.7	958.981	34.7	551.867	34.7	78.2599
34.7	586.395	34.7	181.556	34.7	29.954		34.8	959.865	34.8	552.664	34.8	78.349
34.8	586.993	34.8	181.848	34.8	29.9912		34.9	960.732	34.9	553.461	34.9	78.4357
34.9	587.597	34.9	182.14	34.9	30.032		35	961.593	35	554.248	35	78.5211
35	588.201	35	182.429	35	30.0722		35.1	962.462	35.1	555.042	35.1	78.6088
35.1	588.803	35.1	182.723	35.1	30.1118		35.2	963.328	35.2	555.833	35.2	78.6906
35.2	589.402	35.2	183.016	35.2	30.1504		35.3	964.193	35.3	556.619	35.3	78.7755
35.3	589.994	35.3	183.304	35.3	30.1868		35.4	965.06	35.4	557.398	35.4	78.8618
35.4	590.603	35.4	183.59	35.4	30.2298		35.5	965.92	35.5	558.171	35.5	78.9504
35.5	591.209	35.5	183.875	35.5	30.2658		35.6	966.785	35.6	558.948	35.6	79.0365
35.6	591.805	35.6	184.155	35.6	30.3011		35.7	967.658	35.7	559.725	35.7	79.1245
35.7	592.397	35.7	184.435	35.7	30.3388		35.8	968.514	35.8	560.513	35.8	79.212
35.8	592.987	35.8	184.709	35.8	30.3793		35.9	969.366	35.9	561.291	35.9	79.2942
35.9	593.584	35.9	184.989	35.9	30.4194		36	970.225	36	562.073	36	79.3812
36	594.173	36	185.274	36	30.4565		36.1	971.09	36.1	562.853	36.1	79.4674
36.1	594.763	36.1	185.558	36.1	30.4927		36.2	971.941	36.2	563.626	36.2	79.5528
36.2	595.354	36.2	185.837	36.2	30.5333		36.3	972.791	36.3	564.398	36.3	79.641
36.3	595.937	36.3	186.107	36.3	30.5754		36.4	973.639	36.4	565.177	36.4	79.73
36.4	596.522	36.4	186.384	36.4	30.6136		36.5	974.48	36.5	565.954	36.5	79.818
36.5	597.109	36.5	186.664	36.5	30.6548		36.6	975.314	36.6	566.733	36.6	79.902
36.6	597.691	36.6	186.947	36.6	30.6956		36.7	976.145	36.7	567.509	36.7	79.9773
36.7	598.266	36.7	187.24	36.7	30.732		36.8	976.976	36.8	568.28	36.8	80.0603
36.8	598.846	36.8	187.533	36.8	30.7706		36.9	977.807	36.9	569.042	36.9	80.1453
36.9	599.438	36.9	187.816	36.9	30.8077		37	978.645	37	569.81	37	80.2308
37	600.013	37	188.093	37	30.8445		37.1	979.485	37.1	570.567	37.1	80.3093
37.1	600.591	37.1	188.366	37.1	30.8763		37.2	980.319	37.2	571.328	37.2	80.3861
37.2	601.175	37.2	188.636	37.2	30.9154		37.3	981.155	37.3	572.092	37.3	80.4696
37.3	601.754	37.3	188.91	37.3	30.96		37.4	981.986	37.4	572.847	37.4	80.5467
37.4	602.327	37.4	189.188	37.4	30.9978		37.5	982.824	37.5	573.611	37.5	80.6252
37.5	602.903	37.5	189.471	37.5	31.0329		37.6	983.657	37.6	574.376	37.6	80.7064
37.6	603.465	37.6	189.747	37.6	31.0667		37.7	984.489	37.7	575.127	37.7	80.7884
37.7	604.021	37.7	190.017	37.7	31.1056		37.8	985.321	37.8	575.886	37.8	80.875
37.8	604.596	37.8	190.279	37.8	31.1441		37.9	986.135	37.9	576.639	37.9	80.959
37.9	605.149	37.9	190.546	37.9	31.1807		38	986.957	38	577.397	38	81.048
38	605.693	38	190.824	38	31.2206		38.1	987.765	38.1	578.145	38.1	81.1315
38.1	606.244	38.1	191.103	38.1	31.2551		38.2	988.568	38.2	578.893	38.2	81.2152
38.2	606.795	38.2	191.383	38.2	31.2931		38.3	989.375	38.3	579.643	38.3	81.2983
38.3	607.34	38.3	191.663	38.3	31.3308		38.4	990.18	38.4	580.39	38.4	81.3765
38.4	607.886	38.4	191.941	38.4	31.367		38.5	990.974	38.5	581.146	38.5	81.4633
38.5	608.43	38.5	192.222	38.5	31.4073		38.6	991.77	38.6	581.896	38.6	81.5473
38.6	608.973	38.6	192.502	38.6	31.4461		38.7	992.565	38.7	582.637	38.7	81.6277
38.7	609.519	38.7	192.778	38.7	31.4823		38.8	993.356	38.8	583.379	38.8	81.7083
38.8	610.073	38.8	193.053	38.8	31.5197		38.9	994.156	38.9	584.113	38.9	81.7887
38.9	610.618	38.9	193.332	38.9	31.5541		39	994.954	39	584.862	39	81.8676
39	611.17	39	193.612	39	31.5933		39.1	995.745	39.1	585.609	39.1	81.9498
39.1	611.719	39.1	193.885	39.1	31.6344		39.2	996.541	39.2	586.346	39.2	82.0324
39.2	612.254	39.2	194.146	39.2	31.6732		39.3	997.341	39.3	587.1	39.3	82.1164
39.3	612.792	39.3	194.409	39.3	31.7103		39.4	998.137	39.4	587.84	39.4	82.1963
39.4	613.327	39.4	194.68	39.4	31.7454		39.5	998.931	39.5	588.578	39.5	82.2778
39.5	613.873	39.5	194.957	39.5	31.7821		39.6	999.723	39.6	589.311	39.6	82.3571
39.6	614.41	39.6	195.215	39.6	31.8144		39.7	1000.5	39.7	590.046	39.7	82.4347
39.7	614.949	39.7	195.476	39.7	31.8466		39.8	1001.28	39.8	590.78	39.8	82.5067
39.8	615.494	39.8	195.744	39.8	31.8834		39.9	1002.07	39.9	591.506	39.9	82.5788
39.9	616.036	39.9	196.003	39.9	31.9178		40	1002.85	40	592.229	40	82.6606
40	616.562	40	196.261	40	31.951		40.1	1003.62	40.1	592.951	40.1	82.7387
40.1	617.087	40.1	196.52	40.1	31.985		40.2	1004.39	40.2	593.671	40.2	82.8207
40.2	617.614	40.2	196.777	40.2	32.0231		40.3	1005.16	40.3	594.385	40.3	82.9032
40.3	618.15	40.3	197.049	40.3	32.0586		40.4	1005.92	40.4	595.098	40.4	82.9768
40.4	618.683	40.4	197.327	40.4	32.0899		40.5	1006.68	40.5	595.815	40.5	83.0533
40.5	619.219	40.5	197.594	40.5	32.1245		40.6	1007.44	40.6	596.532	40.6	83.132
40.6	619.742	40.6	197.853	40.6	32.1586		40.7	1008.19	40.7	597.243	40.7	83.2151
40.7	620.257	40.7	198.12	40.7	32.1965		40.8	1008.95	40.8	597.951	40.8	83.2906
40.8	620.781	40.8	198.385	40.8	32.2276		40.9	1009.7	40.9	598.664	40.9	83.3651
40.9	621.298	40.9	198.652	40.9	32.2595		41	1010.45	41	599.367	41	83.4441
41	621.807	41	198.922	41	32.2941		41.1	1011.2	41.1	600.084	41.1	83.5189
41.1	622.328	41.1	199.193	41.1	32.3308		41.2	1011.95	41.2	600.801	41.2	83.594
41.2	622.843	41.2	199.466	41.2	32.367		41.3	1012.7	41.3	601.506	41.3	83.6759
41.3	623.361	41.3	199.731	41.3	32.4025		41.4	1013.45	41.4	602.218	41.4	83.7513
41.4	623.881	41.4	199.989	41.4	32.4407		41.5	1014.2	41.5	602.929	41.5	83.8228
41.5	624.386	41.5	200.244	41.5	32.4765		41.6	1014.95	41.6	603.629	41.6	83.898
41.6	624.896	41.6	200.498	41.6	32.5121		41.7	1015.69	41.7	604.336	41.7	83.9722
41.7	625.402	41.7	200.756	41.7	32.5475		41.8	1016.44	41.8	605.047	41.8	84.0508
41.8	625.912	41.8	201.017	41.8	32.5816		41.9	1017.18	41.9	605.76	41.9	84.1184
41.9	626.432	41.9	201.29	41.9	32.611		42	1017.92	42	606.472	42	84.1943
42	626.942	42	201.557	42	32.6425		42.1	1018.65	42.1	607.183	42.1	84.2706
42.1	627.453	42.1	201.815	42.1	32.6781		42.2	1019.39	42.2	607.877	42.2	84.3469
42.2	627.963	42.2	202.075	42.2	32.7132		42.3	1020.13	42.3	608.57	42.3	84.4211
42.3	628.481	42.3	202.344	42.3	32.748		42.4	1020.86	42.4	609.268	42.4	84.4938
42.4	628.989	42.4	202.611	42.4	32.7818		42.5	1021.58	42.5	609.954	42.5	84.5681
42.5	629.494	42.5	202.874	42.5	32.8168		42.6	1022.3	42.6	610.638	42.6	84.6451
42.6	630.009	42.6	203.138	42.6	32.8451		42.7	1023.02	42.7	611.327	42.7	84.7228
42.7	630.528	42.7	203.405	42.7	32.876		42.8	1023.74	42.8	612.012	42.8	84.8019
42.8	631.046	42.8	203.666	42.8	32.9094		42.9	1024.45	42.9	612.693	42.9	84.8787
42.9	631.552	42.9	203.929	42.9	32.9432		43	1025.16	43	613.374	43	84.9562
43	632.053	43	204.188	43	32.9764		43.1	1025.88	43.1	614.056	43.1	85.036
43.1	632.561	43.1	204.44	43.1	33.016		43.2	1026.59	43.2	614.739	43.2	85.1178
43.2	633.065	43.2	204.693	43.2	33.0558		43.3	1027.29	43.3	615.435	43.3	85.1951
43.3	633.563	43.3	204.953	43.3	33.0877		43.4	1028	43.4	616.124	43.4	85.271
43.4	634.056	43.4	205.209	43.4	33.1156		43.5	1028.71	43.5	616.808	43.5	85.3451
43.5	634.553	43.5	205.467	43.5	33.1495		43.6	1029.42	43.6	617.493	43.6	85.4152
43.6	635.053	43.6	205.727	43.6	33.1794		43.7	1030.13	43.7	618.179	43.7	85.4857
43.7	635.543	43.7	205.979	43.7	33.211		43.8	1030.84	43.8	618.87	43.8	85.5631
43.8	636.039	43.8	206.233	43.8	33.2437		43.9	1031.54	43.9	619.544	43.9	85.6384
43.9	636.531	43.9	206.491	43.9	33.2761		44	1032.25	44	620.216	44	85.7088
44	637.026	44	206.745	44	33.3105		44.1	1032.95	44.1	620.882	44.1	85.7808
44.1	637.515	44.1	206.996	44.1	33.3412		44.2	1033.64	44.2	621.545	44.2	85.8506
44.2	638.01	44.2	207.253	44.2	33.3707		44.3	1034.34	44.3	622.208	44.3	85.9172
44.3	638.499	44.3	207.51	44.3	33.4006		44.4	1035.04	44.4	622.868	44.4	85.9877
44.4	638.991	44.4	207.766	44.4	33.4316		44.5	1035.73	44.5	623.531	44.5	86.0633
44.5	639.485	44.5	208.028	44.5	33.4627		44.6	1036.44	44.6	624.197	44.6	86.1397
44.6	639.98	44.6	208.283	44.6	33.4948		44.7	1037.14	44.7	624.868	44.7	86.2119
44.7	640.469	44.7	208.53	44.7	33.5244		44.8	1037.82	44.8	625.53	44.8	86.2845
44.8	640.95	44.8	208.787	44.8	33.5558		44.9	1038.51	44.9	626.192	44.9	86.3481
44.9	641.432	44.9	209.057	44.9	33.5803		45	1039.2	45	626.844	45	86.4115
45	641.914	45	209.324	45	33.6076		45.1	1039.89	45.1	627.491	45.1	86.4822
45.1	642.397	45.1	209.584	45.1	33.6346		45.2	1040.57	45.2	628.153	45.2	86.5501
45.2	642.883	45.2	209.838	45.2	33.6625		45.3	1041.26	45.3	628.822	45.3	86.6152
45.3	643.361	45.3	210.09	45.3	33.6947		45.4	1041.94	45.4	629.484	45.4	86.6835
45.4	643.838	45.4	210.339	45.4	33.7286		45.5	1042.62	45.5	630.142	45.5	86.7532
45.5	644.321	45.5	210.589	45.5	33.7608		45.6	1043.29	45.6	630.796	45.6	86.8218
45.6	644.795	45.6	210.84	45.6	33.7909		45.7	1043.95	45.7	631.45	45.7	86.895
45.7	645.27	45.7	211.093	45.7	33.8288		45.8	1044.61	45.8	632.105	45.8	86.9661
45.8	645.74	45.8	211.355	45.8	33.8638		45.9	1045.27	45.9	632.758	45.9	87.0347
45.9	646.219	45.9	211.609	45.9	33.8952		46	1045.93	46	633.414	46	87.1024
46	646.694	46	211.86	46	33.9259		46.1	1046.58	46.1	634.073	46.1	87.1626
46.1	647.168	46.1	212.111	46.1	33.959		46.2	1047.24	46.2	634.732	46.2	87.2276
46.2	647.639	46.2	212.366	46.2	33.9901		46.3	1047.9	46.3	635.384	46.3	87.2964
46.3	648.112	46.3	212.619	46.3	34.0218		46.4	1048.55	46.4	636.026	46.4	87.3693
46.4	648.591	46.4	212.873	46.4	34.0539		46.5	1049.21	46.5	636.669	46.5	87.4394
46.5	649.053	46.5	213.124	46.5	34.0912		46.6	1049.86	46.6	637.318	46.6	87.5083
46.6	649.513	46.6	213.369	46.6	34.1255		46.7	1050.52	46.7	637.953	46.7	87.5753
46.7	649.99	46.7	213.609	46.7	34.1573		46.8	1051.18	46.8	638.595	46.8	87.6394
46.8	650.464	46.8	213.855	46.8	34.1855		46.9	1051.83	46.9	639.238	46.9	87.7083
46.9	650.934	46.9	214.105	46.9	34.2148		47	1052.49	47	639.884	47	87.7794
47	651.4	47	214.359	47	34.2433		47.1	1053.15	47.1	640.535	47.1	87.8466
47.1	651.877	47.1	214.608	47.1	34.271		47.2	1053.8	47.2	641.184	47.2	87.9179
47.2	652.351	47.2	214.856	47.2	34.3037		47.3	1054.45	47.3	641.82	47.3	87.9912
47.3	652.823	47.3	215.083	47.3	34.3424		47.4	1055.1	47.4	642.457	47.4	88.0631
47.4	653.284	47.4	215.326	47.4	34.3723		47.5	1055.74	47.5	643.099	47.5	88.1351
47.5	653.744	47.5	215.586	47.5	34.4029		47.6	1056.39	47.6	643.736	47.6	88.207
47.6	654.228	47.6	215.84	47.6	34.4316		47.7	1057.04	47.7	644.373	47.7	88.2808
47.7	654.708	47.7	216.089	47.7	34.4625		47.8	1057.7	47.8	645.016	47.8	88.3535
47.8	655.172	47.8	216.337	47.8	34.4957		47.9	1058.35	47.9	645.656	47.9	88.4247
47.9	655.633	47.9	216.578	47.9	34.5319		48	1058.99	48	646.285	48	88.4966
48	656.097	48	216.818	48	34.5642		48.1	1059.62	48.1	646.913	48.1	88.5689
48.1	656.559	48.1	217.055	48.1	34.5954		48.2	1060.26	48.2	647.542	48.2	88.634
48.2	657.02	48.2	217.302	48.2	34.6253		48.3	1060.91	48.3	648.176	48.3	88.7008
48.3	657.485	48.3	217.556	48.3	34.6551		48.4	1061.56	48.4	648.818	48.4	88.7694
48.4	657.944	48.4	217.822	48.4	34.6842		48.5	1062.19	48.5	649.453	48.5	88.8412
48.5	658.398	48.5	218.081	48.5	34.7171		48.6	1062.82	48.6	650.09	48.6	88.9117
48.6	658.845	48.6	218.326	48.6	34.7496		48.7	1063.46	48.7	650.733	48.7	88.9797
48.7	659.295	48.7	218.573	48.7	34.7805		48.8	1064.09	48.8	651.371	48.8	89.0488
48.8	659.738	48.8	218.826	48.8	34.8094		48.9	1064.72	48.9	652	48.9	89.1151
48.9	660.171	48.9	219.079	48.9	34.8458		49	1065.34	49	652.632	49	89.1834
49	660.606	49	219.335	49	34.8795		49.1	1065.97	49.1	653.266	49.1	89.2485
49.1	661.049	49.1	219.597	49.1	34.9155		49.2	1066.61	49.2	653.889	49.2	89.3149
49.2	661.498	49.2	219.857	49.2	34.9469		49.3	1067.23	49.3	654.516	49.3	89.3808
49.3	661.944	49.3	220.103	49.3	34.9791		49.4	1067.85	49.4	655.134	49.4	89.4516
49.4	662.387	49.4	220.333	49.4	35.0162		49.5	1068.47	49.5	655.744	49.5	89.5208
49.5	662.825	49.5	220.565	49.5	35.0507		49.6	1069.07	49.6	656.365	49.6	89.5864
49.6	663.261	49.6	220.81	49.6	35.0787		49.7	1069.68	49.7	656.99	49.7	89.6521
49.7	663.702	49.7	221.058	49.7	35.1124		49.8	1070.29	49.8	657.599	49.8	89.717
49.8	664.146	49.8	221.308	49.8	35.1445		49.9	1070.89	49.9	658.196	49.9	89.7837
49.9	664.588	49.9	221.546	49.9	35.1742		50	1071.49	50	658.809	50	89.8471
50	665.031	50	221.797	50	35.2012		50.1	1072.1	50.1	659.416	50.1	89.9094
50.1	665.482	50.1	222.049	50.1	35.2312		50.2	1072.7	50.2	660.032	50.2	89.9759
50.2	665.926	50.2	222.29	50.2	35.2656		50.3	1073.29	50.3	660.641	50.3	90.042
50.3	666.364	50.3	222.526	50.3	35.3003		50.4	1073.89	50.4	661.248	50.4	90.1098
50.4	666.799	50.4	222.778	50.4	35.3308		50.5	1074.48	50.5	661.859	50.5	90.1747
50.5	667.229	50.5	223.037	50.5	35.3592		50.6	1075.08	50.6	662.471	50.6	90.2361
50.6	667.667	50.6	223.284	50.6	35.3883		50.7	1075.68	50.7	663.063	50.7	90.2974
50.7	668.115	50.7	223.527	50.7	35.4217		50.8	1076.27	50.8	663.652	50.8	90.3614
50.8	668.552	50.8	223.774	50.8	35.4557		50.9	1076.87	50.9	664.254	50.9	90.4221
50.9	668.981	50.9	224.017	50.9	35.4869		51	1077.47	51	664.853	51	90.4899
51	669.423	51	224.266	51	35.5228		51.1	1078.07	51.1	665.452	51.1	90.5572
51.1	669.868	51.1	224.504	51.1	35.5574		51.2	1078.66	51.2	666.06	51.2	90.6225
51.2	670.309	51.2	224.743	51.2	35.5964		51.3	1079.26	51.3	666.656	51.3	90.6889
51.3	670.738	51.3	224.987	51.3	35.6316		51.4	1079.86	51.4	667.25	51.4	90.7548
51.4	671.176	51.4	225.23	51.4	35.661		51.5	1080.44	51.5	667.845	51.5	90.8189
51.5	671.617	51.5	225.466	51.5	35.6916		51.6	1081.04	51.6	668.437	51.6	90.88
51.6	672.056	51.6	225.704	51.6	35.7206		51.7	1081.63	51.7	669.042	51.7	90.9464
51.7	672.493	51.7	225.949	51.7	35.7569		51.8	1082.23	51.8	669.658	51.8	91.0138
51.8	672.918	51.8	226.193	51.8	35.7902		51.9	1082.81	51.9	670.268	51.9	91.0774
51.9	673.349	51.9	226.428	51.9	35.8232		52	1083.4	52	670.871	52	91.1451
52	673.779	52	226.666	52	35.854		52.1	1083.99	52.1	671.476	52.1	91.2134
52.1	674.192	52.1	226.907	52.1	35.8869		52.2	1084.57	52.2	672.081	52.2	91.2809
52.2	674.618	52.2	227.148	52.2	35.9188		52.3	1085.16	52.3	672.675	52.3	91.3503
52.3	675.048	52.3	227.383	52.3	35.9525		52.4	1085.73	52.4	673.28	52.4	91.4207
52.4	675.488	52.4	227.619	52.4	35.9873		52.5	1086.31	52.5	673.886	52.5	91.4836
52.5	675.923	52.5	227.861	52.5	36.0213		52.6	1086.89	52.6	674.485	52.6	91.5494
52.6	676.351	52.6	228.111	52.6	36.0523		52.7	1087.47	52.7	675.077	52.7	91.6153
52.7	676.777	52.7	228.356	52.7	36.0863		52.8	1088.03	52.8	675.668	52.8	91.6815
52.8	677.2	52.8	228.591	52.8	36.122		52.9	1088.59	52.9	676.252	52.9	91.7492
52.9	677.634	52.9	228.825	52.9	36.1551		53	1089.16	53	676.838	53	91.8094
53	678.063	53	229.061	53	36.1851		53.1	1089.73	53.1	677.426	53.1	91.8698
53.1	678.494	53.1	229.296	53.1	36.2162		53.2	1090.3	53.2	678.009	53.2	91.9348
53.2	678.923	53.2	229.533	53.2	36.2458		53.3	1090.87	53.3	678.6	53.3	91.9958
53.3	679.339	53.3	229.784	53.3	36.2732		53.4	1091.45	53.4	679.197	53.4	92.0567
53.4	679.752	53.4	230.029	53.4	36.2976		53.5	1092.02	53.5	679.787	53.5	92.122
53.5	680.168	53.5	230.266	53.5	36.3287		53.6	1092.58	53.6	680.376	53.6	92.1809
53.6	680.578	53.6	230.492	53.6	36.3533		53.7	1093.15	53.7	680.964	53.7	92.2391
53.7	680.992	53.7	230.717	53.7	36.3832		53.8	1093.71	53.8	681.544	53.8	92.2978
53.8	681.406	53.8	230.95	53.8	36.4119		53.9	1094.28	53.9	682.118	53.9	92.3582
53.9	681.823	53.9	231.185	53.9	36.4399		54	1094.85	54	682.7	54	92.4197
54	682.236	54	231.422	54	36.4705		54.1	1095.41	54.1	683.27	54.1	92.4873
54.1	682.65	54.1	231.659	54.1	36.5015		54.2	1095.95	54.2	683.838	54.2	92.5525
54.2	683.061	54.2	231.9	54.2	36.5291		54.3	1096.51	54.3	684.415	54.3	92.6182
54.3	683.485	54.3	232.136	54.3	36.5612		54.4	1097.06	54.4	684.986	54.4	92.6834
54.4	683.9	54.4	232.363	54.4	36.5966		54.5	1097.61	54.5	685.554	54.5	92.7455
54.5	684.312	54.5	232.601	54.5	36.6317		54.6	1098.16	54.6	686.123	54.6	92.8038
54.6	684.73	54.6	232.843	54.6	36.6611		54.7	1098.72	54.7	686.684	54.7	92.8615
54.7	685.148	54.7	233.085	54.7	36.688		54.8	1099.27	54.8	687.251	54.8	92.9182
54.8	685.563	54.8	233.332	54.8	36.7153		54.9	1099.81	54.9	687.839	54.9	92.978
54.9	685.97	54.9	233.571	54.9	36.7434		55	1100.35	55	688.42	55	93.0334
55	686.376	55	233.8	55	36.7692		55.1	1100.9	55.1	688.989	55.1	93.0926
55.1	686.781	55.1	234.038	55.1	36.8018		55.2	1101.45	55.2	689.555	55.2	93.1519
55.2	687.187	55.2	234.276	55.2	36.8286		55.3	1101.98	55.3	690.132	55.3	93.2108
55.3	687.587	55.3	234.502	55.3	36.8565		55.4	1102.52	55.4	690.709	55.4	93.2664
55.4	687.984	55.4	234.734	55.4	36.8782		55.5	1103.05	55.5	691.271	55.5	93.3202
55.5	688.39	55.5	234.969	55.5	36.9007		55.6	1103.6	55.6	691.828	55.6	93.3759
55.6	688.796	55.6	235.195	55.6	36.9292		55.7	1104.13	55.7	692.39	55.7	93.4358
55.7	689.21	55.7	235.425	55.7	36.9621		55.8	1104.66	55.8	692.954	55.8	93.4931
55.8	689.617	55.8	235.652	55.8	36.9904		55.9	1105.18	55.9	693.517	55.9	93.5524
55.9	690.04	55.9	235.879	55.9	37.0218		56	1105.71	56	694.075	56	93.6131
56	690.464	56	236.119	56	37.0497		56.1	1106.23	56.1	694.632	56.1	93.6771
56.1	690.883	56.1	236.356	56.1	37.0843		56.2	1106.76	56.2	695.192	56.2	93.7364
56.2	691.298	56.2	236.589	56.2	37.1182		56.3	1107.29	56.3	695.758	56.3	93.7968
56.3	691.703	56.3	236.818	56.3	37.1486		56.4	1107.82	56.4	696.316	56.4	93.8576
56.4	692.105	56.4	237.052	56.4	37.1819		56.5	1108.35	56.5	696.87	56.5	93.9149
56.5	692.515	56.5	237.281	56.5	37.2087		56.6	1108.88	56.6	697.431	56.6	93.9721
56.6	692.924	56.6	237.507	56.6	37.2395		56.7	1109.41	56.7	697.996	56.7	94.0241
56.7	693.341	56.7	237.746	56.7	37.2654		56.8	1109.95	56.8	698.556	56.8	94.0772
56.8	693.743	56.8	237.989	56.8	37.2888		56.9	1110.5	56.9	699.105	56.9	94.1316
56.9	694.146	56.9	238.227	56.9	37.32		57	1111.03	57	699.654	57	94.191
57	694.538	57	238.457	57	37.3511		57.1	1111.56	57.1	700.201	57.1	94.2362
57.1	694.937	57.1	238.686	57.1	37.363		57.2	1112.08	57.2	700.762	57.2	94.2911
57.2	695.326	57.2	238.912	57.2	37.3913		57.3	1112.6	57.3	701.31	57.3	94.348
57.3	695.727	57.3	239.139	57.3	37.4182		57.4	1113.11	57.4	701.86	57.4	94.4045
57.4	696.139	57.4	239.365	57.4	37.4489		57.5	1113.63	57.5	702.406	57.5	94.4582
57.5	696.551	57.5	239.589	57.5	37.4787		57.6	1114.15	57.6	702.953	57.6	94.5198
57.6	696.965	57.6	239.813	57.6	37.5091		57.7	1114.66	57.7	703.503	57.7	94.5815
57.7	697.37	57.7	240.047	57.7	37.5401		57.8	1115.18	57.8	704.052	57.8	94.6457
57.8	697.771	57.8	240.268	57.8	37.5648		57.9	1115.69	57.9	704.596	57.9	94.6947
57.9	698.169	57.9	240.481	57.9	37.5915		58	1116.21	58	705.149	58	94.7427
58	698.567	58	240.705	58	37.6121		58.1	1116.73	58.1	705.699	58.1	94.7996
58.1	698.969	58.1	240.933	58.1	37.6372		58.2	1117.25	58.2	706.256	58.2	94.8562
58.2	699.361	58.2	241.167	58.2	37.6621		58.3	1117.77	58.3	706.802	58.3	94.9145
58.3	699.755	58.3	241.39	58.3	37.6963		58.4	1118.27	58.4	707.342	58.4	94.9599
58.4	700.15	58.4	241.616	58.4	37.7228		58.5	1118.78	58.5	707.892	58.5	95.0191
58.5	700.548	58.5	241.845	58.5	37.7477		58.6	1119.28	58.6	708.448	58.6	95.0669
58.6	700.933	58.6	242.095	58.6	37.7691		58.7	1119.78	58.7	708.99	58.7	95.12
58.7	701.312	58.7	242.345	58.7	37.7993		58.8	1120.27	58.8	709.547	58.8	95.1748
58.8	701.701	58.8	242.578	58.8	37.8414		58.9	1120.76	58.9	710.103	58.9	95.2249
58.9	702.093	58.9	242.811	58.9	37.882		59	1121.26	59	710.642	59	95.2831
59	702.499	59	243.044	59	37.9109		59.1	1121.27	59.1	711.179	59.1	95.2249
59.1	702.514	59.1	243.051	59.1	37.882		59.2	1121.26	59.2	711.196	59.2	95.2249
59.2	702.499	59.2	243.044	59.2	37.882		59.3	1121.26	59.3	711.196	59.3	95.1748
59.3	702.499	59.3	243.044	59.3	37.8414		59.4	1121.27	59.4	711.245	59.4	95.1748
59.4	702.514	59.4	243.051	59.4	37.8414		59.5	1121.51	59.5	711.669	59.5	95.1232
59.5	702.499	59.5	243.044	59.5	37.8025		59.6	1121.51	59.6	711.715	59.6	95.12
59.6	702.34	59.6	242.814	59.6	37.7993		59.7	1121.37	59.7	711.738	59.7	95.0697
59.7	702.291	59.7	242.811	59.7	37.7719		59.8	1121.27	59.8	711.738	59.8	95.0669
59.8	702.197	59.8	242.58	59.8	37.7691		59.9	1121.26	59.9	711.715	59.9	95.0192
59.9	702.166	59.9	242.578	59.9	37.7477		60	1121.06	60	711.669	60	95.0191
60	702.166	60	242.439	60	37.7477		60.1	1121.06	60.1	711.669	60.1	94.6009
60.1	702.166	60.1	242.439	60.1	37.6435		60.2	1121.06	60.2	711.669	60.2	94.2056
60.2	702.166	60.2	242.439	60.2	37.6367		60.3	1121.06	60.3	711.669	60.3	91.2072
60.3	702.166	60.3	242.439	60.3	35.7632		60.4	1121.06	60.4	711.669	60.4	91.1623
60.4	702.166	60.4	242.323	60.4	35.6622		60.5	1121.06	60.5	711.669	60.5	90.8385
60.5	702.166	60.5	241.518	60.5	35.4213		60.6	1120.77	60.6	711.669	60.6	90.7693
60.6	702.109	60.6	241.484	60.6	35.2692		60.7	1120.51	60.7	711.669	60.7	90.7018
60.7	701.905	60.7	241.341	60.7	35.2591		60.8	1120.36	60.8	711.499	60.8	90.4777
60.8	701.812	60.8	241.211	60.8	35.2591		60.9	1120.3	60.9	711.245	60.9	90.4444
60.9	701.713	60.9	241.14	60.9	35.2578		61	1120.28	61	711.196	61	90.4444
61	701.713	61	241.065	61	35.2088		61.1	1120.15	61.1	711.157	61.1	90.4444
61.1	701.506	61.1	241.03	61.1	35.2088		61.2	1119.92	61.2	710.627	61.2	90.4444
61.2	701.455	61.2	240.966	61.2	35.2088		61.3	1119.75	61.3	709.503	61.3	90.4444
61.3	701.405	61.3	240.951	61.3	35.2088		61.4	1119.75	61.4	708.659	61.4	90.4444
61.4	701.388	61.4	240.93	61.4	35.2088		61.5	1117.74	61.5	707.138	61.5	90.4444
61.5	701.294	61.5	240.888	61.5	35.2088		61.6	1115.83	61.6	705.879	61.6	90.3809
61.6	700.288	61.6	240.706	61.6	35.2088		61.7	1113.81	61.7	704.101	61.7	90.3673
61.7	699.104	61.7	240.133	61.7	35.2088		61.8	1112.15	61.8	702.633	61.8	90.1494
61.8	697.759	61.8	239.304	61.8	35.2088		61.9	1110.11	61.9	701.077	61.9	90.0843
61.9	696.213	61.9	238.666	61.9	35.1829		62	1108.37	62	699.805	62	90.053
62	694.686	62	238.053	62	35.029		62.1	1106.48	62.1	698.307	62.1	89.8163
62.1	693.272	62.1	237.645	62.1	34.9242		62.2	1104.75	62.2	697.021	62.2	89.5662
62.2	691.915	62.2	236.991	62.2	34.723		62.3	1102.97	62.3	695.655	62.3	89.5041
62.3	690.541	62.3	236.416	62.3	34.6805		62.4	1101.32	62.4	694.517	62.4	89.2931
62.4	689.172	62.4	235.951	62.4	34.4701		62.5	1099.68	62.5	693.321	62.5	89.1849
62.5	687.829	62.5	235.473	62.5	34.4099		62.6	1098.07	62.6	692.078	62.6	89.0066
62.6	686.494	62.6	234.972	62.6	34.3917		62.7	1096.48	62.7	690.914	62.7	88.9579
62.7	685.155	62.7	234.576	62.7	34.4435		62.8	1095.03	62.8	689.757	62.8	88.7071
62.8	683.833	62.8	234.09	62.8	34.2153		62.9	1093.45	62.9	688.668	62.9	88.6216
62.9	682.51	62.9	233.613	62.9	34.1217		63	1092.03	63	687.632	63	88.4464
63	681.224	63	233.076	63	34.0008		63.1	1090.74	63.1	686.536	63.1	88.3187
63.1	680.004	63.1	232.535	63.1	33.9775		63.2	1089.24	63.2	685.413	63.2	88.2126
63.2	678.782	63.2	232.121	63.2	33.8504		63.3	1087.88	63.3	684.431	63.3	88.0074
63.3	677.529	63.3	231.72	63.3	33.7288		63.4	1086.56	63.4	683.361	63.4	87.8613
63.4	676.309	63.4	231.333	63.4	33.607		63.5	1085.19	63.5	682.451	63.5	87.68
63.5	675.138	63.5	230.906	63.5	33.5289		63.6	1083.83	63.6	681.496	63.6	87.5547
63.6	673.93	63.6	230.471	63.6	33.4465		63.7	1082.52	63.7	680.606	63.7	87.4324
63.7	672.781	63.7	230.058	63.7	33.3736		63.8	1081.28	63.8	679.657	63.8	87.2918
63.8	671.583	63.8	229.644	63.8	33.3053		63.9	1080.04	63.9	678.759	63.9	87.1394
63.9	670.414	63.9	229.236	63.9	33.1988		64	1078.86	64	677.876	64	87.0004
64	669.267	64	228.837	64	33.1535		64.1	1077.58	64.1	676.989	64.1	86.8757
64.1	668.142	64.1	228.461	64.1	33.0934		64.2	1076.39	64.2	676.089	64.2	86.7354
64.2	667.014	64.2	228.043	64.2	33.0101		64.3	1075.18	64.3	675.215	64.3	86.5838
64.3	665.913	64.3	227.646	64.3	32.9384		64.4	1074.1	64.4	674.384	64.4	86.4568
64.4	664.817	64.4	227.283	64.4	32.859		64.5	1072.97	64.5	673.56	64.5	86.345
64.5	663.739	64.5	226.931	64.5	32.8064		64.6	1071.84	64.6	672.741	64.6	86.2276
64.6	662.658	64.6	226.586	64.6	32.7484		64.7	1070.69	64.7	671.946	64.7	86.1274
64.7	661.588	64.7	226.25	64.7	32.7006		64.8	1069.67	64.8	671.165	64.8	86.0254
64.8	660.531	64.8	225.902	64.8	32.6274		64.9	1068.62	64.9	670.394	64.9	85.9186
64.9	659.497	64.9	225.558	64.9	32.5674		65	1067.62	65	669.636	65	85.8078
65	658.461	65	225.213	65	32.5145		65.1	1066.61	65.1	668.893	65.1	85.6951
65.1	657.42	65.1	224.875	65.1	32.4481		65.2	1065.63	65.2	668.153	65.2	85.6046
65.2	656.395	65.2	224.552	65.2	32.3914		65.3	1064.64	65.3	667.432	65.3	85.4909
65.3	655.398	65.3	224.238	65.3	32.3376		65.4	1063.66	65.4	666.719	65.4	85.3815
65.4	654.413	65.4	223.919	65.4	32.2845		65.5	1062.7	65.5	665.995	65.5	85.2889
65.5	653.435	65.5	223.575	65.5	32.2287		65.6	1061.76	65.6	665.297	65.6	85.1864
65.6	652.469	65.6	223.234	65.6	32.1798		65.7	1060.83	65.7	664.619	65.7	85.0876
65.7	651.518	65.7	222.918	65.7	32.116		65.8	1059.92	65.8	663.929	65.8	84.983
65.8	650.575	65.8	222.596	65.8	32.0701		65.9	1059.02	65.9	663.248	65.9	84.8859
65.9	649.646	65.9	222.288	65.9	32.0199		66	1058.14	66	662.586	66	84.7935
66	648.719	66	221.985	66	31.9774		66.1	1057.27	66.1	661.928	66.1	84.7075
66.1	647.804	66.1	221.691	66.1	31.9319		66.2	1056.41	66.2	661.266	66.2	84.6097
66.2	646.908	66.2	221.409	66.2	31.8899		66.3	1055.57	66.3	660.617	66.3	84.5295
66.3	646.021	66.3	221.129	66.3	31.8445		66.4	1054.76	66.4	659.972	66.4	84.4415
66.4	645.129	66.4	220.836	66.4	31.8078		66.5	1053.96	66.5	659.343	66.5	84.3578
66.5	644.253	66.5	220.555	66.5	31.767		66.6	1053.18	66.6	658.708	66.6	84.2713
66.6	643.384	66.6	220.276	66.6	31.7226		66.7	1052.41	66.7	658.084	66.7	84.1915
66.7	642.527	66.7	220	66.7	31.6803		66.8	1051.65	66.8	657.455	66.8	84.1095
66.8	641.696	66.8	219.703	66.8	31.6429		66.9	1050.9	66.9	656.851	66.9	84.0314
66.9	640.875	66.9	219.421	66.9	31.6019		67	1050.15	67	656.268	67	83.9521
67	640.046	67	219.162	67	31.5587		67.1	1049.41	67.1	655.695	67.1	83.8672
67.1	639.229	67.1	218.891	67.1	31.5131		67.2	1048.68	67.2	655.135	67.2	83.788
67.2	638.414	67.2	218.631	67.2	31.4657		67.3	1047.96	67.3	654.576	67.3	83.7041
67.3	637.59	67.3	218.373	67.3	31.4137		67.4	1047.25	67.4	654.026	67.4	83.6257
67.4	636.774	67.4	218.106	67.4	31.3673		67.5	1046.55	67.5	653.479	67.5	83.5504
67.5	635.982	67.5	217.852	67.5	31.3272		67.6	1045.83	67.6	652.907	67.6	83.4816
67.6	635.175	67.6	217.582	67.6	31.2876		67.7	1045.13	67.7	652.366	67.7	83.4108
67.7	634.382	67.7	217.343	67.7	31.2476		67.8	1044.44	67.8	651.83	67.8	83.3308
67.8	633.613	67.8	217.103	67.8	31.1998		67.9	1043.76	67.9	651.294	67.9	83.2547
67.9	632.843	67.9	216.856	67.9	31.1575		68	1043.1	68	650.758	68	83.1806
68	632.091	68	216.605	68	31.1188		68.1	1042.46	68.1	650.238	68.1	83.1078
68.1	631.337	68.1	216.378	68.1	31.0803		68.2	1041.82	68.2	649.699	68.2	83.0421
68.2	630.586	68.2	216.136	68.2	31.0448		68.3	1041.19	68.3	649.154	68.3	82.9678
68.3	629.85	68.3	215.89	68.3	31.0063		68.4	1040.56	68.4	648.625	68.4	82.8939
68.4	629.128	68.4	215.644	68.4	30.9647		68.5	1039.94	68.5	648.111	68.5	82.8192
68.5	628.417	68.5	215.399	68.5	30.9182		68.6	1039.34	68.6	647.586	68.6	82.738
68.6	627.715	68.6	215.14	68.6	30.8731		68.7	1038.73	68.7	647.082	68.7	82.6626
68.7	627.004	68.7	214.907	68.7	30.8328		68.8	1038.14	68.8	646.582	68.8	82.589
68.8	626.297	68.8	214.675	68.8	30.7887		68.9	1037.56	68.9	646.081	68.9	82.5121
68.9	625.6	68.9	214.435	68.9	30.7468		69	1036.96	69	645.587	69	82.4372
69	624.886	69	214.197	69	30.7081		69.1	1036.37	69.1	645.088	69.1	82.366
69.1	624.171	69.1	213.977	69.1	30.6708		69.2	1035.79	69.2	644.595	69.2	82.3053
69.2	623.48	69.2	213.761	69.2	30.6324		69.3	1035.22	69.3	644.098	69.3	82.234
69.3	622.794	69.3	213.53	69.3	30.6037		69.4	1034.65	69.4	643.615	69.4	82.1758
69.4	622.115	69.4	213.31	69.4	30.5797		69.5	1034.08	69.5	643.137	69.5	82.1096
69.5	621.433	69.5	213.098	69.5	30.5459		69.6	1033.53	69.6	642.665	69.6	82.0398
69.6	620.754	69.6	212.884	69.6	30.5084		69.7	1032.97	69.7	642.188	69.7	81.9753
69.7	620.083	69.7	212.652	69.7	30.4779		69.8	1032.42	69.8	641.729	69.8	81.9115
69.8	619.416	69.8	212.435	69.8	30.4473		69.9	1031.9	69.9	641.263	69.9	81.8434
69.9	618.76	69.9	212.222	69.9	30.4093		70	1031.38	70	640.802	70	81.778
70	618.106	70	212.021	70	30.379		70.1	1030.86	70.1	640.353	70.1	81.7123
70.1	617.459	70.1	211.817	70.1	30.3503		70.2	1030.35	70.2	639.908	70.2	81.6452
70.2	616.822	70.2	211.611	70.2	30.3191		70.3	1029.84	70.3	639.46	70.3	81.5778
70.3	616.196	70.3	211.413	70.3	30.2846		70.4	1029.34	70.4	639.018	70.4	81.5162
70.4	615.576	70.4	211.206	70.4	30.2568		70.5	1028.83	70.5	638.586	70.5	81.4555
70.5	614.945	70.5	211.005	70.5	30.2265		70.6	1028.33	70.6	638.136	70.6	81.3915
70.6	614.327	70.6	210.799	70.6	30.1966		70.7	1027.83	70.7	637.675	70.7	81.332
70.7	613.719	70.7	210.585	70.7	30.1676		70.8	1027.34	70.8	637.229	70.8	81.2721
70.8	613.115	70.8	210.391	70.8	30.1369		70.9	1026.86	70.9	636.779	70.9	81.2192
70.9	612.526	70.9	210.19	70.9	30.1104		71	1026.37	71	636.348	71	81.1593
71	611.941	71	209.99	71	30.0766		71.1	1025.88	71.1	635.926	71.1	81.1032
71.1	611.347	71.1	209.779	71.1	30.0476		71.2	1025.4	71.2	635.49	71.2	81.046
71.2	610.758	71.2	209.583	71.2	30.015		71.3	1024.92	71.3	635.059	71.3	80.9874
71.3	610.175	71.3	209.393	71.3	29.9881		71.4	1024.45	71.4	634.637	71.4	80.9297
71.4	609.595	71.4	209.197	71.4	29.956		71.5	1023.98	71.5	634.217	71.5	80.8737
71.5	609.012	71.5	209.003	71.5	29.929		71.6	1023.52	71.6	633.779	71.6	80.815
71.6	608.433	71.6	208.809	71.6	29.8958		71.7	1023.08	71.7	633.348	71.7	80.7556
71.7	607.857	71.7	208.619	71.7	29.8617		71.8	1022.63	71.8	632.936	71.8	80.7013
71.8	607.286	71.8	208.434	71.8	29.8356		71.9	1022.18	71.9	632.523	71.9	80.6456
71.9	606.718	71.9	208.246	71.9	29.8082		72	1021.73	72	632.11	72	80.5859
72	606.149	72	208.057	72	29.777		72.1	1021.28	72.1	631.691	72.1	80.5282
72.1	605.592	72.1	207.873	72.1	29.7473		72.2	1020.84	72.2	631.271	72.2	80.4754
72.2	605.042	72.2	207.689	72.2	29.7179		72.3	1020.4	72.3	630.856	72.3	80.419
72.3	604.491	72.3	207.5	72.3	29.6855		72.4	1019.97	72.4	630.445	72.4	80.3596
72.4	603.939	72.4	207.315	72.4	29.6523		72.5	1019.55	72.5	630.036	72.5	80.3012
72.5	603.39	72.5	207.141	72.5	29.6251		72.6	1019.13	72.6	629.629	72.6	80.2486
72.6	602.844	72.6	206.963	72.6	29.5994		72.7	1018.7	72.7	629.241	72.7	80.1941
72.7	602.313	72.7	206.78	72.7	29.5726		72.8	1018.27	72.8	628.855	72.8	80.1385
72.8	601.781	72.8	206.6	72.8	29.5478		72.9	1017.85	72.9	628.464	72.9	80.0914
72.9	601.258	72.9	206.433	72.9	29.5268		73	1017.44	73	628.072	73	80.0466
73	600.734	73	206.263	73	29.5041		73.1	1017.04	73.1	627.682	73.1	79.9979
73.1	600.224	73.1	206.095	73.1	29.4795		73.2	1016.64	73.2	627.294	73.2	79.9485
73.2	599.715	73.2	205.92	73.2	29.4539		73.3	1016.25	73.3	626.916	73.3	79.8961
73.3	599.204	73.3	205.757	73.3	29.4295		73.4	1015.84	73.4	626.543	73.4	79.8472
73.4	598.681	73.4	205.592	73.4	29.4085		73.5	1015.44	73.5	626.162	73.5	79.798
73.5	598.17	73.5	205.421	73.5	29.3846		73.6	1015.05	73.6	625.792	73.6	79.7473
73.6	597.663	73.6	205.256	73.6	29.361		73.7	1014.65	73.7	625.42	73.7	79.6976
73.7	597.165	73.7	205.087	73.7	29.3377		73.8	1014.27	73.8	625.044	73.8	79.6508
73.8	596.668	73.8	204.922	73.8	29.3166		73.9	1013.88	73.9	624.667	73.9	79.6035
73.9	596.166	73.9	204.76	73.9	29.2966		74	1013.48	74	624.296	74	79.5568
74	595.663	74	204.589	74	29.2787		74.1	1013.11	74.1	623.926	74.1	79.5083
74.1	595.166	74.1	204.426	74.1	29.2547		74.2	1012.73	74.2	623.558	74.2	79.4658
74.2	594.673	74.2	204.267	74.2	29.2372		74.3	1012.34	74.3	623.196	74.3	79.4151
74.3	594.185	74.3	204.105	74.3	29.2177		74.4	1011.96	74.4	622.826	74.4	79.3635
74.4	593.705	74.4	203.938	74.4	29.1923		74.5	1011.6	74.5	622.454	74.5	79.3169
74.5	593.246	74.5	203.778	74.5	29.1687		74.6	1011.23	74.6	622.081	74.6	79.2675
74.6	592.773	74.6	203.607	74.6	29.1422		74.7	1010.86	74.7	621.726	74.7	79.2223
74.7	592.3	74.7	203.449	74.7	29.1214		74.8	1010.49	74.8	621.362	74.8	79.1759
74.8	591.836	74.8	203.285	74.8	29.0993		74.9	1010.13	74.9	620.989	74.9	79.1254
74.9	591.376	74.9	203.118	74.9	29.0789		75	1009.76	75	620.626	75	79.0812
75	590.923	75	202.959	75	29.0604		75.1	1009.39	75.1	620.269	75.1	79.0381
75.1	590.469	75.1	202.8	75.1	29.0392		75.2	1009.02	75.2	619.919	75.2	78.9928
75.2	589.999	75.2	202.644	75.2	29.0163		75.3	1008.67	75.3	619.563	75.3	78.946
75.3	589.53	75.3	202.486	75.3	28.9939		75.4	1008.3	75.4	619.206	75.4	78.9011
75.4	589.06	75.4	202.327	75.4	28.9703		75.5	1007.94	75.5	618.853	75.5	78.855
75.5	588.602	75.5	202.171	75.5	28.9502		75.6	1007.58	75.6	618.503	75.6	78.8114
75.6	588.146	75.6	202.018	75.6	28.9304		75.7	1007.23	75.7	618.156	75.7	78.7671
75.7	587.692	75.7	201.863	75.7	28.9112		75.8	1006.87	75.8	617.808	75.8	78.7245
75.8	587.249	75.8	201.712	75.8	28.8895		75.9	1006.51	75.9	617.458	75.9	78.6812
75.9	586.806	75.9	201.56	75.9	28.8737		76	1006.16	76	617.114	76	78.6399
76	586.354	76	201.408	76	28.8565		76.1	1005.81	76.1	616.78	76.1	78.5934
76.1	585.906	76.1	201.263	76.1	28.8348		76.2	1005.47	76.2	616.438	76.2	78.5502
76.2	585.467	76.2	201.122	76.2	28.8121		76.3	1005.12	76.3	616.094	76.3	78.5079
76.3	585.042	76.3	200.982	76.3	28.7889		76.4	1004.78	76.4	615.748	76.4	78.4616
76.4	584.624	76.4	200.836	76.4	28.7666		76.5	1004.43	76.5	615.409	76.5	78.42
76.5	584.206	76.5	200.69	76.5	28.7442		76.6	1004.1	76.6	615.071	76.6	78.3755
76.6	583.789	76.6	200.546	76.6	28.7253		76.7	1003.75	76.7	614.73	76.7	78.3361
76.7	583.372	76.7	200.407	76.7	28.7058		76.8	1003.41	76.8	614.381	76.8	78.293
76.8	582.962	76.8	200.268	76.8	28.6863		76.9	1003.08	76.9	614.044	76.9	78.2493
76.9	582.546	76.9	200.132	76.9	28.6663		77	1002.74	77	613.71	77	78.2056
77	582.129	77	199.986	77	28.6473		77.1	1002.4	77.1	613.373	77.1	78.1585
77.1	581.72	77.1	199.838	77.1	28.6266		77.2	1002.07	77.2	613.031	77.2	78.1106
77.2	581.301	77.2	199.696	77.2	28.6045		77.3	1001.74	77.3	612.694	77.3	78.0665
77.3	580.882	77.3	199.56	77.3	28.5851		77.4	1001.4	77.4	612.364	77.4	78.0228
77.4	580.479	77.4	199.422	77.4	28.5638		77.5	1001.08	77.5	612.027	77.5	77.9784
77.5	580.068	77.5	199.281	77.5	28.5444		77.6	1000.76	77.6	611.696	77.6	77.9368
77.6	579.66	77.6	199.143	77.6	28.5249		77.7	1000.44	77.7	611.374	77.7	77.9004
77.7	579.26	77.7	199.005	77.7	28.5038		77.8	1000.13	77.8	611.054	77.8	77.8645
77.8	578.857	77.8	198.863	77.8	28.4888		77.9	999.824	77.9	610.734	77.9	77.8232
77.9	578.452	77.9	198.725	77.9	28.466		78	999.506	78	610.413	78	77.779
78	578.055	78	198.585	78	28.4436		78.1	999.198	78.1	610.086	78.1	77.7393
78.1	577.663	78.1	198.446	78.1	28.4256		78.2	998.892	78.2	609.767	78.2	77.6976
78.2	577.275	78.2	198.307	78.2	28.4087		78.3	998.574	78.3	609.456	78.3	77.6602
78.3	576.885	78.3	198.169	78.3	28.3941		78.4	998.262	78.4	609.14	78.4	77.6224
78.4	576.496	78.4	198.035	78.4	28.3799		78.5	997.958	78.5	608.816	78.5	77.5868
78.5	576.104	78.5	197.9	78.5	28.3611		78.6	997.65	78.6	608.512	78.6	77.55
78.6	575.718	78.6	197.762	78.6	28.3439		78.7	997.334	78.7	608.211	78.7	77.5103
78.7	575.322	78.7	197.623	78.7	28.3241		78.8	997.02	78.8	607.887	78.8	77.4707
78.8	574.927	78.8	197.48	78.8	28.3066		78.9	996.704	78.9	607.574	78.9	77.4307
78.9	574.534	78.9	197.343	78.9	28.2842		79	996.396	79	607.283	79	77.3933
79	574.152	79	197.208	79	28.2656		79.1	996.103	79.1	606.984	79.1	77.3549
79.1	573.773	79.1	197.071	79.1	28.2454		79.2	995.803	79.2	606.674	79.2	77.3151
79.2	573.389	79.2	196.935	79.2	28.2247		79.3	995.497	79.3	606.364	79.3	77.2767
79.3	573.005	79.3	196.801	79.3	28.2044		79.4	995.193	79.4	606.07	79.4	77.2383
79.4	572.625	79.4	196.663	79.4	28.1848		79.5	994.892	79.5	605.776	79.5	77.199
79.5	572.252	79.5	196.532	79.5	28.167		79.6	994.596	79.6	605.478	79.6	77.1617
79.6	571.885	79.6	196.402	79.6	28.1502		79.7	994.301	79.7	605.174	79.7	77.1247
79.7	571.527	79.7	196.269	79.7	28.1325		79.8	994.002	79.8	604.875	79.8	77.0854
79.8	571.171	79.8	196.14	79.8	28.1105		79.9	993.708	79.9	604.579	79.9	77.0478
79.9	570.813	79.9	196.016	79.9	28.0904		80	993.422	80	604.277	80	77.0087
80	570.459	80	195.888	80	28.0705		80.1	993.121	80.1	603.959	80.1	76.9715
80.1	570.099	80.1	195.766	80.1	28.0507		80.2	992.814	80.2	603.647	80.2	76.9328
80.2	569.741	80.2	195.641	80.2	28.0345		80.3	992.512	80.3	603.34	80.3	76.8936
80.3	569.394	80.3	195.513	80.3	28.0153		80.4	992.216	80.4	603.041	80.4	76.8594
80.4	569.05	80.4	195.387	80.4	27.9967		80.5	991.923	80.5	602.723	80.5	76.8259
80.5	568.703	80.5	195.261	80.5	27.9796		80.6	991.634	80.6	602.414	80.6	76.7937
80.6	568.35	80.6	195.139	80.6	27.9641		80.7	991.343	80.7	602.121	80.7	76.7552
80.7	568.001	80.7	195.017	80.7	27.9518		80.8	991.05	80.8	601.817	80.8	76.7159
80.8	567.66	80.8	194.888	80.8	27.9326		80.9	990.755	80.9	601.501	80.9	76.6789
80.9	567.314	80.9	194.764	80.9	27.9164		81	990.455	81	601.185	81	76.6405
81	566.968	81	194.641	81	27.8978		81.1	990.154	81.1	600.874	81.1	76.6004
81.1	566.625	81.1	194.525	81.1	27.8814		81.2	989.869	81.2	600.583	81.2	76.5632
81.2	566.288	81.2	194.41	81.2	27.8674		81.3	989.584	81.3	600.284	81.3	76.5245
81.3	565.94	81.3	194.296	81.3	27.8492		81.4	989.292	81.4	599.985	81.4	76.4902
81.4	565.588	81.4	194.178	81.4	27.8325		81.5	989.011	81.5	599.692	81.5	76.4554
81.5	565.246	81.5	194.063	81.5	27.8142		81.6	988.73	81.6	599.398	81.6	76.4197
81.6	564.899	81.6	193.944	81.6	27.7985		81.7	988.447	81.7	599.114	81.7	76.3811
81.7	564.559	81.7	193.821	81.7	27.7815		81.8	988.158	81.8	598.823	81.8	76.3423
81.8	564.223	81.8	193.707	81.8	27.7625		81.9	987.879	81.9	598.533	81.9	76.3085
81.9	563.883	81.9	193.588	81.9	27.7434		82	987.612	82	598.262	82	76.2713
82	563.542	82	193.473	82	27.7242		82.1	987.343	82.1	597.985	82.1	76.2334
82.1	563.205	82.1	193.355	82.1	27.7035		82.2	987.071	82.2	597.703	82.2	76.2031
82.2	562.869	82.2	193.235	82.2	27.6889		82.3	986.798	82.3	597.42	82.3	76.1706
82.3	562.54	82.3	193.119	82.3	27.6767		82.4	986.52	82.4	597.134	82.4	76.1345
82.4	562.213	82.4	193	82.4	27.6651		82.5	986.252	82.5	596.849	82.5	76.1025
82.5	561.89	82.5	192.889	82.5	27.6521		82.6	985.988	82.6	596.561	82.6	76.0647
82.6	561.563	82.6	192.773	82.6	27.64		82.7	985.719	82.7	596.274	82.7	76.0316
82.7	561.23	82.7	192.654	82.7	27.6258		82.8	985.448	82.8	595.986	82.8	75.997
82.8	560.897	82.8	192.537	82.8	27.611		82.9	985.18	82.9	595.711	82.9	75.9681
82.9	560.566	82.9	192.422	82.9	27.5956		83	984.916	83	595.427	83	75.9323
83	560.236	83	192.301	83	27.58		83.1	984.654	83.1	595.141	83.1	75.8985
83.1	559.905	83.1	192.189	83.1	27.5643		83.2	984.392	83.2	594.865	83.2	75.8658
83.2	559.587	83.2	192.08	83.2	27.5481		83.3	984.123	83.3	594.589	83.3	75.8359
83.3	559.271	83.3	191.971	83.3	27.5327		83.4	983.857	83.4	594.315	83.4	75.8016
83.4	558.957	83.4	191.861	83.4	27.5152		83.5	983.6	83.5	594.049	83.5	75.7663
83.5	558.635	83.5	191.749	83.5	27.5002		83.6	983.344	83.6	593.786	83.6	75.7331
83.6	558.316	83.6	191.636	83.6	27.4842		83.7	983.084	83.7	593.509	83.7	75.6975
83.7	558.016	83.7	191.525	83.7	27.4668		83.8	982.817	83.8	593.253	83.8	75.6668
83.8	557.72	83.8	191.416	83.8	27.4564		83.9	982.547	83.9	592.994	83.9	75.6324
83.9	557.428	83.9	191.31	83.9	27.4398		84	982.278	84	592.714	84	75.5987
84	557.126	84	191.194	84	27.4282		84.1	982.01	84.1	592.447	84.1	75.5697
84.1	556.823	84.1	191.083	84.1	27.4155		84.2	981.749	84.2	592.178	84.2	75.5393
84.2	556.527	84.2	190.972	84.2	27.3994		84.3	981.496	84.3	591.905	84.3	75.5112
84.3	556.226	84.3	190.861	84.3	27.3841		84.4	981.242	84.4	591.636	84.4	75.4814
84.4	555.925	84.4	190.755	84.4	27.3686		84.5	980.975	84.5	591.363	84.5	75.4562
84.5	555.621	84.5	190.651	84.5	27.3598		84.6	980.709	84.6	591.091	84.6	75.4234
84.6	555.323	84.6	190.537	84.6	27.3505		84.7	980.452	84.7	590.825	84.7	75.3907
84.7	555.024	84.7	190.43	84.7	27.3356		84.8	980.197	84.8	590.561	84.8	75.3591
84.8	554.731	84.8	190.324	84.8	27.3228		84.9	979.948	84.9	590.291	84.9	75.3295
84.9	554.435	84.9	190.221	84.9	27.3135		85	979.707	85	590.019	85	75.3017
85	554.131	85	190.12	85	27.3089		85.1	979.468	85.1	589.758	85.1	75.2703
85.1	553.831	85.1	190.016	85.1	27.2971		85.2	979.22	85.2	589.486	85.2	75.238
85.2	553.532	85.2	189.913	85.2	27.2893		85.3	978.962	85.3	589.216	85.3	75.2099
85.3	553.238	85.3	189.807	85.3	27.2792		85.4	978.697	85.4	588.951	85.4	75.1789
85.4	552.949	85.4	189.71	85.4	27.2703		85.5	978.445	85.5	588.683	85.5	75.1491
85.5	552.659	85.5	189.608	85.5	27.2592		85.6	978.205	85.6	588.431	85.6	75.1193
85.6	552.376	85.6	189.504	85.6	27.2478		85.7	977.965	85.7	588.17	85.7	75.0885
85.7	552.097	85.7	189.403	85.7	27.2362		85.8	977.722	85.8	587.909	85.8	75.0582
85.8	551.812	85.8	189.301	85.8	27.2244		85.9	977.483	85.9	587.644	85.9	75.0292
85.9	551.514	85.9	189.194	85.9	27.2126		86	977.236	86	587.38	86	74.9995
86	551.225	86	189.091	86	27.1959		86.1	976.986	86.1	587.114	86.1	74.9688
86.1	550.954	86.1	188.988	86.1	27.1844		86.2	976.734	86.2	586.855	86.2	74.9403
86.2	550.681	86.2	188.88	86.2	27.175		86.3	976.486	86.3	586.607	86.3	74.9135
86.3	550.407	86.3	188.779	86.3	27.1608		86.4	976.243	86.4	586.362	86.4	74.8827
86.4	550.131	86.4	188.68	86.4	27.1442		86.5	975.997	86.5	586.116	86.5	74.8511
86.5	549.851	86.5	188.578	86.5	27.1317		86.6	975.752	86.6	585.865	86.6	74.8168
86.6	549.575	86.6	188.476	86.6	27.1147		86.7	975.499	86.7	585.61	86.7	74.7864
86.7	549.292	86.7	188.369	86.7	27.1026		86.8	975.242	86.8	585.36	86.8	74.7577
86.8	549.016	86.8	188.269	86.8	27.0915		86.9	974.992	86.9	585.103	86.9	74.7289
86.9	548.746	86.9	188.172	86.9	27.0804		87	974.739	87	584.854	87	74.7026
87	548.472	87	188.074	87	27.0675		87.1	974.502	87.1	584.624	87.1	74.6741
87.1	548.191	87.1	187.982	87.1	27.0547		87.2	974.28	87.2	584.385	87.2	74.6429
87.2	547.907	87.2	187.884	87.2	27.0363		87.3	974.051	87.3	584.136	87.3	74.6153
87.3	547.628	87.3	187.787	87.3	27.02		87.4	973.817	87.4	583.882	87.4	74.5845
87.4	547.353	87.4	187.69	87.4	27.0073		87.5	973.581	87.5	583.629	87.5	74.5545
87.5	547.078	87.5	187.594	87.5	26.9964		87.6	973.34	87.6	583.37	87.6	74.5275
87.6	546.797	87.6	187.495	87.6	26.9848		87.7	973.108	87.7	583.12	87.7	74.5006
87.7	546.529	87.7	187.396	87.7	26.9703		87.8	972.876	87.8	582.868	87.8	74.4747
87.8	546.271	87.8	187.294	87.8	26.9555		87.9	972.645	87.9	582.612	87.9	74.448
87.9	546.01	87.9	187.193	87.9	26.9449		88	972.407	88	582.372	88	74.4207
88	545.76	88	187.099	88	26.9349		88.1	972.168	88.1	582.135	88.1	74.3929
88.1	545.509	88.1	187	88.1	26.9248		88.2	971.925	88.2	581.894	88.2	74.3625
88.2	545.252	88.2	186.901	88.2	26.9144		88.3	971.684	88.3	581.652	88.3	74.3332
88.3	544.994	88.3	186.806	88.3	26.9012		88.4	971.443	88.4	581.403	88.4	74.3055
88.4	544.729	88.4	186.703	88.4	26.8872		88.5	971.209	88.5	581.166	88.5	74.28
88.5	544.462	88.5	186.605	88.5	26.8727		88.6	970.974	88.6	580.933	88.6	74.2533
88.6	544.195	88.6	186.506	88.6	26.8554		88.7	970.748	88.7	580.694	88.7	74.2288
88.7	543.933	88.7	186.408	88.7	26.8409		88.8	970.528	88.8	580.444	88.8	74.2023
88.8	543.668	88.8	186.314	88.8	26.8288		88.9	970.302	88.9	580.202	88.9	74.1761
88.9	543.406	88.9	186.222	88.9	26.8202		89	970.079	89	579.956	89	74.1458
89	543.14	89	186.126	89	26.8136		89.1	969.858	89.1	579.71	89.1	74.1206
89.1	542.866	89.1	186.035	89.1	26.8019		89.2	969.633	89.2	579.46	89.2	74.0943
89.2	542.609	89.2	185.94	89.2	26.786		89.3	969.409	89.3	579.211	89.3	74.0649
89.3	542.358	89.3	185.846	89.3	26.7764		89.4	969.184	89.4	578.968	89.4	74.0354
89.4	542.107	89.4	185.753	89.4	26.7642		89.5	968.955	89.5	578.729	89.5	74.0127
89.5	541.861	89.5	185.663	89.5	26.7581		89.6	968.73	89.6	578.487	89.6	73.9892
89.6	541.618	89.6	185.57	89.6	26.7484		89.7	968.505	89.7	578.233	89.7	73.9628
89.7	541.377	89.7	185.48	89.7	26.7406		89.8	968.268	89.8	577.995	89.8	73.9401
89.8	541.117	89.8	185.386	89.8	26.7339		89.9	968.032	89.9	577.759	89.9	73.9149
89.9	540.857	89.9	185.294	89.9	26.7233		90	967.801	90	577.522	90	73.8894
90	540.612	90	185.206	90	26.7137		90.1	967.57	90.1	577.291	90.1	73.861
90.1	540.367	90.1	185.119	90.1	26.6991		90.2	967.343	90.2	577.06	90.2	73.8316
90.2	540.122	90.2	185.028	90.2	26.6865		90.3	967.126	90.3	576.83	90.3	73.8047
90.3	539.867	90.3	184.942	90.3	26.6766		90.4	966.894	90.4	576.607	90.4	73.7772
90.4	539.615	90.4	184.848	90.4	26.6673		90.5	966.66	90.5	576.382	90.5	73.7502
90.5	539.374	90.5	184.754	90.5	26.6595		90.6	966.439	90.6	576.149	90.6	73.7212
90.6	539.131	90.6	184.661	90.6	26.6441		90.7	966.214	90.7	575.915	90.7	73.6959
90.7	538.891	90.7	184.569	90.7	26.6345		90.8	965.99	90.8	575.687	90.8	73.6672
90.8	538.646	90.8	184.479	90.8	26.6234		90.9	965.776	90.9	575.457	90.9	73.6418
90.9	538.407	90.9	184.389	90.9	26.611		91	965.555	91	575.226	91	73.6136
91	538.171	91	184.301	91	26.5974		91.1	965.33	91.1	575.003	91.1	73.5871
91.1	537.932	91.1	184.209	91.1	26.5812		91.2	965.109	91.2	574.782	91.2	73.5567
91.2	537.694	91.2	184.121	91.2	26.5674		91.3	964.882	91.3	574.554	91.3	73.5293
91.3	537.459	91.3	184.031	91.3	26.5511		91.4	964.655	91.4	574.331	91.4	73.5004
91.4	537.222	91.4	183.944	91.4	26.5391		91.5	964.44	91.5	574.101	91.5	73.4713
91.5	536.986	91.5	183.86	91.5	26.5237		91.6	964.22	91.6	573.866	91.6	73.44
91.6	536.755	91.6	183.774	91.6	26.5139		91.7	963.996	91.7	573.64	91.7	73.4119
91.7	536.533	91.7	183.688	91.7	26.5035		91.8	963.781	91.8	573.417	91.8	73.3842
91.8	536.301	91.8	183.595	91.8	26.4912		91.9	963.564	91.9	573.19	91.9	73.3578
91.9	536.069	91.9	183.507	91.9	26.4791		92	963.349	92	572.964	92	73.3307
92	535.845	92	183.421	92	26.468		92.1	963.147	92.1	572.739	92.1	73.3058
92.1	535.622	92.1	183.336	92.1	26.463		92.2	962.935	92.2	572.511	92.2	73.2808
92.2	535.386	92.2	183.249	92.2	26.4475		92.3	962.72	92.3	572.283	92.3	73.2541
92.3	535.15	92.3	183.166	92.3	26.432		92.4	962.505	92.4	572.059	92.4	73.2279
92.4	534.919	92.4	183.082	92.4	26.4216		92.5	962.289	92.5	571.837	92.5	73.2044
92.5	534.692	92.5	182.996	92.5	26.4149		92.6	962.08	92.6	571.61	92.6	73.1798
92.6	534.483	92.6	182.909	92.6	26.4071		92.7	961.868	92.7	571.383	92.7	73.1551
92.7	534.264	92.7	182.82	92.7	26.4034		92.8	961.663	92.8	571.162	92.8	73.1339
92.8	534.028	92.8	182.739	92.8	26.3943		92.9	961.463	92.9	570.944	92.9	73.1137
92.9	533.799	92.9	182.659	92.9	26.3824		93	961.252	93	570.718	93	73.0873
93	533.581	93	182.574	93	26.3703		93.1	961.034	93.1	570.501	93.1	73.0629
93.1	533.361	93.1	182.495	93.1	26.3611		93.2	960.826	93.2	570.274	93.2	73.0362
93.2	533.133	93.2	182.411	93.2	26.351		93.3	960.62	93.3	570.051	93.3	73.014
93.3	532.91	93.3	182.326	93.3	26.3482		93.4	960.408	93.4	569.825	93.4	72.9887
93.4	532.684	93.4	182.241	93.4	26.3396		93.5	960.191	93.5	569.597	93.5	72.9641
93.5	532.461	93.5	182.157	93.5	26.3272		93.6	959.987	93.6	569.376	93.6	72.9371
93.6	532.234	93.6	182.068	93.6	26.3154		93.7	959.776	93.7	569.159	93.7	72.9081
93.7	532.003	93.7	181.98	93.7	26.3047		93.8	959.567	93.8	568.944	93.8	72.883
93.8	531.768	93.8	181.897	93.8	26.2973		93.9	959.358	93.9	568.724	93.9	72.8559
93.9	531.536	93.9	181.812	93.9	26.2862		94	959.145	94	568.513	94	72.8352
94	531.314	94	181.727	94	26.2773		94.1	958.937	94.1	568.303	94.1	72.8105
94.1	531.099	94.1	181.639	94.1	26.2705		94.2	958.73	94.2	568.092	94.2	72.7872
94.2	530.889	94.2	181.556	94.2	26.2601		94.3	958.518	94.3	567.887	94.3	72.7642
94.3	530.668	94.3	181.476	94.3	26.2513		94.4	958.315	94.4	567.679	94.4	72.7387
94.4	530.449	94.4	181.392	94.4	26.2429		94.5	958.111	94.5	567.469	94.5	72.7117
94.5	530.231	94.5	181.312	94.5	26.2355		94.6	957.905	94.6	567.255	94.6	72.6853
94.6	530.009	94.6	181.23	94.6	26.2286		94.7	957.697	94.7	567.037	94.7	72.6586
94.7	529.788	94.7	181.148	94.7	26.2215		94.8	957.49	94.8	566.818	94.8	72.6347
94.8	529.58	94.8	181.071	94.8	26.2119		94.9	957.28	94.9	566.618	94.9	72.6097
94.9	529.371	94.9	180.994	94.9	26.2019		95	957.081	95	566.415	95	72.587
95	529.162	95	180.915	95	26.1936		95.1	956.873	95.1	566.197	95.1	72.5643
95.1	528.952	95.1	180.836	95.1	26.1801		95.2	956.66	95.2	565.976	95.2	72.541
95.2	528.737	95.2	180.759	95.2	26.1709		95.3	956.458	95.3	565.765	95.3	72.5157
95.3	528.516	95.3	180.683	95.3	26.1636		95.4	956.255	95.4	565.55	95.4	72.4943
95.4	528.294	95.4	180.599	95.4	26.1548		95.5	956.051	95.5	565.338	95.5	72.4751
95.5	528.083	95.5	180.518	95.5	26.1498		95.6	955.86	95.6	565.131	95.6	72.4466
95.6	527.871	95.6	180.436	95.6	26.1376		95.7	955.663	95.7	564.921	95.7	72.4202
95.7	527.659	95.7	180.357	95.7	26.1253		95.8	955.455	95.8	564.72	95.8	72.3975
95.8	527.453	95.8	180.278	95.8	26.1156		95.9	955.253	95.9	564.518	95.9	72.3711
95.9	527.251	95.9	180.204	95.9	26.1009		96	955.061	96	564.311	96	72.3446
96	527.051	96	180.124	96	26.0874		96.1	954.876	96.1	564.102	96.1	72.3207
96.1	526.846	96.1	180.045	96.1	26.0801		96.2	954.685	96.2	563.901	96.2	72.2973
96.2	526.632	96.2	179.967	96.2	26.0733		96.3	954.485	96.3	563.705	96.3	72.2765
96.3	526.424	96.3	179.892	96.3	26.0692		96.4	954.294	96.4	563.505	96.4	72.2538
96.4	526.228	96.4	179.813	96.4	26.0638		96.5	954.101	96.5	563.3	96.5	72.2282
96.5	526.035	96.5	179.735	96.5	26.0536		96.6	953.906	96.6	563.091	96.6	72.2043
96.6	525.838	96.6	179.661	96.6	26.0427		96.7	953.71	96.7	562.886	96.7	72.182
96.7	525.639	96.7	179.584	96.7	26.0297		96.8	953.511	96.8	562.692	96.8	72.1634
96.8	525.44	96.8	179.507	96.8	26.02		96.9	953.318	96.9	562.486	96.9	72.1448
96.9	525.245	96.9	179.425	96.9	26.0104		97	953.122	97	562.285	97	72.1209
97	525.041	97	179.347	97	26.0058		97.1	952.927	97.1	562.082	97.1	72.1002
97.1	524.839	97.1	179.273	97.1	25.9955		97.2	952.737	97.2	561.877	97.2	72.0783
97.2	524.64	97.2	179.197	97.2	25.9885		97.3	952.538	97.3	561.674	97.3	72.0572
97.3	524.435	97.3	179.121	97.3	25.9829		97.4	952.341	97.4	561.474	97.4	72.0371
97.4	524.239	97.4	179.048	97.4	25.9788		97.5	952.146	97.5	561.27	97.5	72.0147
97.5	524.046	97.5	178.979	97.5	25.9672		97.6	951.958	97.6	561.069	97.6	71.9966
97.6	523.847	97.6	178.901	97.6	25.9634		97.7	951.769	97.7	560.877	97.7	71.9816
97.7	523.643	97.7	178.823	97.7	25.9566		97.8	951.578	97.8	560.682	97.8	71.9611
97.8	523.444	97.8	178.746	97.8	25.9447		97.9	951.381	97.9	560.492	97.9	71.9414
97.9	523.251	97.9	178.678	97.9	25.9359		98	951.188	98	560.3	98	71.923
98	523.055	98	178.606	98	25.9289		98.1	951.003	98.1	560.098	98.1	71.902
98.1	522.853	98.1	178.531	98.1	25.921		98.2	950.808	98.2	559.897	98.2	71.8787
98.2	522.659	98.2	178.452	98.2	25.9056		98.3	950.615	98.3	559.702	98.3	71.8543
98.3	522.471	98.3	178.378	98.3	25.9005		98.4	950.429	98.4	559.506	98.4	71.8301
98.4	522.282	98.4	178.307	98.4	25.8939		98.5	950.242	98.5	559.309	98.5	71.8091
98.5	522.093	98.5	178.235	98.5	25.8879		98.6	950.057	98.6	559.112	98.6	71.7901
98.6	521.912	98.6	178.159	98.6	25.8777		98.7	949.869	98.7	558.917	98.7	71.7684
98.7	521.723	98.7	178.083	98.7	25.8694		98.8	949.683	98.8	558.725	98.8	71.7458
98.8	521.534	98.8	178.012	98.8	25.8571		98.9	949.495	98.9	558.526	98.9	71.7191
98.9	521.344	98.9	177.941	98.9	25.8452		99	949.308	99	558.324	99	71.6961
99	521.16	99	177.872	99	25.8385		99.1	949.118	99.1	558.122	99.1	71.6769
99.1	520.971	99.1	177.797	99.1	25.8344		99.2	948.931	99.2	557.914	99.2	71.6565
99.2	520.775	99.2	177.722	99.2	25.8254		99.3	948.743	99.3	557.708	99.3	71.6358
99.3	520.585	99.3	177.65	99.3	25.817		99.4	948.552	99.4	557.512	99.4	71.6151
99.4	520.396	99.4	177.581	99.4	25.8075		99.5	948.357	99.5	557.316	99.5	71.5936
99.5	520.202	99.5	177.505	99.5	25.7981		99.6	948.162	99.6	557.117	99.6	71.5766
99.6	520.009	99.6	177.431	99.6	25.7937		99.7	947.97	99.7	556.925	99.7	71.561
99.7	519.821	99.7	177.362	99.7	25.7863		99.8	947.788	99.8	556.734	99.8	71.541
99.8	519.631	99.8	177.295	99.8	25.7751		99.9	947.593	99.9	556.542	99.9	71.5163
99.9	519.44	99.9	177.225	99.9	25.7643		100	947.402	100	556.352	100	71.4964
100	519.249	100	177.16	100	25.7583		100.1	947.223	100.1	556.168	100.1	71.4732
100.1	519.059	100.1	177.092	100.1	25.7473		100.2	947.034	100.2	555.98	100.2	71.449
100.2	518.872	100.2	177.022	100.2	25.7354		100.3	946.846	100.3	555.785	100.3	71.426
100.3	518.689	100.3	176.954	100.3	25.725		100.4	946.659	100.4	555.596	100.4	71.4042
100.4	518.509	100.4	176.886	100.4	25.717		100.5	946.466	100.5	555.41	100.5	71.3836
100.5	518.325	100.5	176.815	100.5	25.7089		100.6	946.278	100.6	555.223	100.6	71.3624
100.6	518.142	100.6	176.744	100.6	25.6988		100.7	946.097	100.7	555.04	100.7	71.3439
100.7	517.97	100.7	176.676	100.7	25.6901		100.8	945.914	100.8	554.858	100.8	71.3221
100.8	517.796	100.8	176.611	100.8	25.6797		100.9	945.731	100.9	554.672	100.9	71.3026
100.9	517.618	100.9	176.54	100.9	25.6706		101	945.558	101	554.484	101	71.2811
101	517.438	101	176.468	101	25.6583		101.1	945.379	101.1	554.284	101.1	71.2595
101.1	517.262	101.1	176.397	101.1	25.6457		101.2	945.202	101.2	554.099	101.2	71.2372
101.2	517.092	101.2	176.333	101.2	25.6363		101.3	945.032	101.3	553.918	101.3	71.2161
101.3	516.915	101.3	176.263	101.3	25.6231		101.4	944.853	101.4	553.731	101.4	71.1985
101.4	516.735	101.4	176.19	101.4	25.615		101.5	944.672	101.5	553.553	101.5	71.177
101.5	516.56	101.5	176.123	101.5	25.6057		101.6	944.497	101.6	553.363	101.6	71.1538
101.6	516.387	101.6	176.053	101.6	25.5972		101.7	944.316	101.7	553.172	101.7	71.1362
101.7	516.207	101.7	175.985	101.7	25.5905		101.8	944.139	101.8	552.991	101.8	71.1201
101.8	516.036	101.8	175.92	101.8	25.5822		101.9	943.974	101.9	552.8	101.9	71.1005
101.9	515.861	101.9	175.851	101.9	25.5723		102	943.803	102	552.607	102	71.0822
102	515.679	102	175.779	102	25.5689		102.1	943.625	102.1	552.422	102.1	71.063
102.1	515.502	102.1	175.708	102.1	25.564		102.2	943.442	102.2	552.236	102.2	71.0438
102.2	515.322	102.2	175.636	102.2	25.5557		102.3	943.262	102.3	552.046	102.3	71.022
102.3	515.138	102.3	175.562	102.3	25.5457		102.4	943.089	102.4	551.858	102.4	71.0018
102.4	514.962	102.4	175.488	102.4	25.5324		102.5	942.909	102.5	551.675	102.5	70.9823
102.5	514.78	102.5	175.418	102.5	25.5223		102.6	942.731	102.6	551.5	102.6	70.9682
102.6	514.6	102.6	175.353	102.6	25.5156		102.7	942.554	102.7	551.32	102.7	70.9509
102.7	514.427	102.7	175.287	102.7	25.5069		102.8	942.37	102.8	551.135	102.8	70.931
102.8	514.261	102.8	175.219	102.8	25.5016		102.9	942.186	102.9	550.948	102.9	70.9111
102.9	514.09	102.9	175.153	102.9	25.4916		103	942.006	103	550.762	103	70.8932
103	513.914	103	175.088	103	25.4852		103.1	941.829	103.1	550.576	103.1	70.8752
103.1	513.74	103.1	175.021	103.1	25.4757		103.2	941.652	103.2	550.395	103.2	70.8547
103.2	513.561	103.2	174.956	103.2	25.4672		103.3	941.471	103.3	550.216	103.3	70.8308
103.3	513.39	103.3	174.895	103.3	25.4556		103.4	941.304	103.4	550.042	103.4	70.8141
103.4	513.232	103.4	174.833	103.4	25.4482		103.5	941.121	103.5	549.868	103.5	70.7922
103.5	513.06	103.5	174.765	103.5	25.4362		103.6	940.949	103.6	549.692	103.6	70.7758
103.6	512.891	103.6	174.698	103.6	25.4331		103.7	940.776	103.7	549.509	103.7	70.7558
103.7	512.718	103.7	174.63	103.7	25.4258		103.8	940.601	103.8	549.326	103.8	70.7347
103.8	512.554	103.8	174.565	103.8	25.4168		103.9	940.43	103.9	549.154	103.9	70.7148
103.9	512.389	103.9	174.499	103.9	25.4092		104	940.261	104	548.977	104	70.6926
104	512.232	104	174.438	104	25.3983		104.1	940.086	104.1	548.8	104.1	70.67
104.1	512.074	104.1	174.374	104.1	25.3883		104.2	939.911	104.2	548.624	104.2	70.6493
104.2	511.907	104.2	174.31	104.2	25.3792		104.3	939.734	104.3	548.448	104.3	70.6314
104.3	511.742	104.3	174.249	104.3	25.3776		104.4	939.554	104.4	548.273	104.4	70.6118
104.4	511.577	104.4	174.187	104.4	25.3698		104.5	939.383	104.5	548.096	104.5	70.5966
104.5	511.415	104.5	174.125	104.5	25.36		104.6	939.215	104.6	547.921	104.6	70.5826
104.6	511.249	104.6	174.058	104.6	25.3574		104.7	939.035	104.7	547.742	104.7	70.563
104.7	511.078	104.7	173.996	104.7	25.3523		104.8	938.867	104.8	547.563	104.8	70.546
104.8	510.915	104.8	173.932	104.8	25.3414		104.9	938.703	104.9	547.386	104.9	70.5288
104.9	510.755	104.9	173.867	104.9	25.3321		105	938.538	105	547.214	105	70.5108
105	510.596	105	173.802	105	25.3255		105.1	938.365	105.1	547.039	105.1	70.4894
105.1	510.434	105.1	173.734	105.1	25.3155		105.2	938.197	105.2	546.865	105.2	70.4706
105.2	510.272	105.2	173.672	105.2	25.3056		105.3	938.032	105.3	546.689	105.3	70.4505
105.3	510.106	105.3	173.606	105.3	25.2988		105.4	937.863	105.4	546.512	105.4	70.4325
105.4	509.931	105.4	173.54	105.4	25.2914		105.5	937.697	105.5	546.332	105.5	70.4087
105.5	509.767	105.5	173.473	105.5	25.2795		105.6	937.525	105.6	546.157	105.6	70.3931
105.6	509.606	105.6	173.413	105.6	25.2714		105.7	937.357	105.7	545.987	105.7	70.3717
105.7	509.449	105.7	173.353	105.7	25.2639		105.8	937.184	105.8	545.804	105.8	70.35
105.8	509.283	105.8	173.286	105.8	25.2571		105.9	937.02	105.9	545.628	105.9	70.3344
105.9	509.118	105.9	173.223	105.9	25.256		106	936.86	106	545.452	106	70.3196
106	508.957	106	173.155	106	25.2509		106.1	936.698	106.1	545.274	106.1	70.3005
106.1	508.802	106.1	173.091	106.1	25.2429		106.2	936.528	106.2	545.101	106.2	70.2808
106.2	508.641	106.2	173.025	106.2	25.2387		106.3	936.359	106.3	544.929	106.3	70.263
106.3	508.483	106.3	172.961	106.3	25.2332		106.4	936.193	106.4	544.759	106.4	70.2474
106.4	508.333	106.4	172.899	106.4	25.2265		106.5	936.025	106.5	544.594	106.5	70.2331
106.5	508.173	106.5	172.837	106.5	25.2182		106.6	935.858	106.6	544.425	106.6	70.2159
106.6	508.014	106.6	172.777	106.6	25.209		106.7	935.685	106.7	544.259	106.7	70.2005
106.7	507.857	106.7	172.715	106.7	25.2021		106.8	935.514	106.8	544.083	106.8	70.1794
106.8	507.698	106.8	172.652	106.8	25.192		106.9	935.343	106.9	543.906	106.9	70.16
106.9	507.538	106.9	172.589	106.9	25.1851		107	935.175	107	543.739	107	70.1405
107	507.387	107	172.529	107	25.1752		107.1	935.007	107.1	543.57	107.1	70.1243
107.1	507.238	107.1	172.467	107.1	25.1688		107.2	934.845	107.2	543.404	107.2	70.1075
107.2	507.084	107.2	172.401	107.2	25.1648		107.3	934.678	107.3	543.235	107.3	70.0918
107.3	506.926	107.3	172.334	107.3	25.1589		107.4	934.512	107.4	543.069	107.4	70.0755
107.4	506.782	107.4	172.279	107.4	25.1563		107.5	934.357	107.5	542.906	107.5	70.0549
107.5	506.639	107.5	172.22	107.5	25.1478		107.6	934.197	107.6	542.75	107.6	70.0391
107.6	506.49	107.6	172.159	107.6	25.1413		107.7	934.027	107.7	542.591	107.7	70.0261
107.7	506.338	107.7	172.098	107.7	25.1345		107.8	933.859	107.8	542.429	107.8	70.0098
107.8	506.191	107.8	172.042	107.8	25.1303		107.9	933.69	107.9	542.266	107.9	69.9887
107.9	506.038	107.9	171.982	107.9	25.1243		108	933.528	108	542.095	108	69.9696
108	505.883	108	171.922	108	25.1199		108.1	933.367	108.1	541.93	108.1	69.9516
108.1	505.732	108.1	171.867	108.1	25.1113		108.2	933.204	108.2	541.761	108.2	69.9343
108.2	505.58	108.2	171.814	108.2	25.1037		108.3	933.041	108.3	541.593	108.3	69.9181
108.3	505.423	108.3	171.76	108.3	25.0943		108.4	932.885	108.4	541.432	108.4	69.904
108.4	505.266	108.4	171.706	108.4	25.0884		108.5	932.729	108.5	541.26	108.5	69.8824
108.5	505.113	108.5	171.652	108.5	25.0848		108.6	932.568	108.6	541.091	108.6	69.8644
108.6	504.968	108.6	171.597	108.6	25.0797		108.7	932.408	108.7	540.936	108.7	69.8402
108.7	504.824	108.7	171.542	108.7	25.0687		108.8	932.254	108.8	540.771	108.8	69.8214
108.8	504.677	108.8	171.481	108.8	25.0602		108.9	932.094	108.9	540.615	108.9	69.8049
108.9	504.525	108.9	171.426	108.9	25.0555		109	931.936	109	540.453	109	69.7865
109	504.371	109	171.366	109	25.0462		109.1	931.77	109.1	540.286	109.1	69.7683
109.1	504.215	109.1	171.307	109.1	25.0376		109.2	931.605	109.2	540.13	109.2	69.7536
109.2	504.063	109.2	171.253	109.2	25.0304		109.3	931.443	109.3	539.973	109.3	69.736
109.3	503.919	109.3	171.194	109.3	25.0252		109.4	931.277	109.4	539.811	109.4	69.7206
109.4	503.772	109.4	171.134	109.4	25.0208		109.5	931.115	109.5	539.64	109.5	69.7035
109.5	503.614	109.5	171.072	109.5	25.0129		109.6	930.962	109.6	539.469	109.6	69.6939
109.6	503.46	109.6	171.012	109.6	25.0087		109.7	930.801	109.7	539.31	109.7	69.6756
109.7	503.308	109.7	170.952	109.7	25.0002		109.8	930.642	109.8	539.153	109.8	69.6573
109.8	503.168	109.8	170.897	109.8	24.989		109.9	930.489	109.9	538.994	109.9	69.6394
109.9	503.026	109.9	170.84	109.9	24.9787		110	930.337	110	538.834	110	69.6231
110	502.88	110	170.786	110	24.9736		110.1	930.173	110.1	538.674	110.1	69.6066
110.1	502.732	110.1	170.73	110.1	24.9707		110.2	930.011	110.2	538.512	110.2	69.5878
110.2	502.583	110.2	170.671	110.2	24.9654		110.3	929.848	110.3	538.352	110.3	69.5724
110.3	502.442	110.3	170.618	110.3	24.9605		110.4	929.689	110.4	538.194	110.4	69.5568
110.4	502.299	110.4	170.56	110.4	24.9532		110.5	929.532	110.5	538.036	110.5	69.5431
110.5	502.16	110.5	170.504	110.5	24.9485		110.6	929.372	110.6	537.874	110.6	69.5304
110.6	502.018	110.6	170.448	110.6	24.945		110.7	929.209	110.7	537.716	110.7	69.5104
110.7	501.875	110.7	170.39	110.7	24.9317		110.8	929.05	110.8	537.551	110.8	69.4919
110.8	501.735	110.8	170.333	110.8	24.9218		110.9	928.888	110.9	537.389	110.9	69.4694
110.9	501.588	110.9	170.28	110.9	24.9129		111	928.726	111	537.235	111	69.4527
111	501.448	111	170.224	111	24.9101		111.1	928.57	111.1	537.085	111.1	69.4392
111.1	501.301	111.1	170.168	111.1	24.9064		111.2	928.417	111.2	536.926	111.2	69.4302
111.2	501.156	111.2	170.111	111.2	24.9049		111.3	928.269	111.3	536.766	111.3	69.4143
111.3	501.015	111.3	170.057	111.3	24.8983		111.4	928.12	111.4	536.613	111.4	69.3981
111.4	500.874	111.4	170.005	111.4	24.8929		111.5	927.963	111.5	536.456	111.5	69.3837
111.5	500.737	111.5	169.949	111.5	24.8913		111.6	927.809	111.6	536.302	111.6	69.3733
111.6	500.593	111.6	169.897	111.6	24.8912		111.7	927.658	111.7	536.142	111.7	69.356
111.7	500.452	111.7	169.843	111.7	24.8878		111.8	927.504	111.8	535.981	111.8	69.3409
111.8	500.311	111.8	169.784	111.8	24.882		111.9	927.344	111.9	535.829	111.9	69.3263
111.9	500.171	111.9	169.733	111.9	24.8779		112	927.188	112	535.67	112	69.3105
112	500.029	112	169.674	112	24.8701		112.1	927.041	112.1	535.52	112.1	69.2907
112.1	499.887	112.1	169.622	112.1	24.8611		112.2	926.891	112.2	535.367	112.2	69.2735
112.2	499.745	112.2	169.565	112.2	24.8553		112.3	926.743	112.3	535.214	112.3	69.2601
112.3	499.608	112.3	169.513	112.3	24.8459		112.4	926.599	112.4	535.063	112.4	69.2457
112.4	499.468	112.4	169.46	112.4	24.8402		112.5	926.451	112.5	534.911	112.5	69.2293
112.5	499.335	112.5	169.403	112.5	24.8353		112.6	926.299	112.6	534.755	112.6	69.2112
112.6	499.207	112.6	169.347	112.6	24.8314		112.7	926.144	112.7	534.603	112.7	69.1986
112.7	499.069	112.7	169.291	112.7	24.8275		112.8	925.993	112.8	534.45	112.8	69.1827
112.8	498.934	112.8	169.237	112.8	24.8203		112.9	925.847	112.9	534.297	112.9	69.1709
112.9	498.802	112.9	169.187	112.9	24.8142		113	925.701	113	534.142	113	69.1571
113	498.665	113	169.131	113	24.8095		113.1	925.548	113.1	533.987	113.1	69.1425
113.1	498.526	113.1	169.076	113.1	24.8064		113.2	925.399	113.2	533.833	113.2	69.1246
113.2	498.393	113.2	169.021	113.2	24.8003		113.3	925.248	113.3	533.678	113.3	69.1084
113.3	498.254	113.3	168.97	113.3	24.7933		113.4	925.097	113.4	533.521	113.4	69.0907
113.4	498.12	113.4	168.918	113.4	24.7891		113.5	924.945	113.5	533.364	113.5	69.0765
113.5	497.99	113.5	168.862	113.5	24.7881		113.6	924.791	113.6	533.206	113.6	69.0649
113.6	497.857	113.6	168.805	113.6	24.7867		113.7	924.641	113.7	533.049	113.7	69.0503
113.7	497.721	113.7	168.748	113.7	24.7773		113.8	924.49	113.8	532.897	113.8	69.0301
113.8	497.582	113.8	168.692	113.8	24.769		113.9	924.34	113.9	532.741	113.9	69.0135
113.9	497.447	113.9	168.638	113.9	24.7603		114	924.189	114	532.59	114	68.9965
114	497.314	114	168.586	114	24.7527		114.1	924.039	114.1	532.436	114.1	68.9831
114.1	497.172	114.1	168.53	114.1	24.7473		114.2	923.895	114.2	532.286	114.2	68.9687
114.2	497.04	114.2	168.469	114.2	24.7412		114.3	923.741	114.3	532.133	114.3	68.9534
114.3	496.909	114.3	168.413	114.3	24.7333		114.4	923.587	114.4	531.976	114.4	68.9387
114.4	496.785	114.4	168.357	114.4	24.7278		114.5	923.44	114.5	531.828	114.5	68.9218
114.5	496.654	114.5	168.306	114.5	24.7208		114.6	923.292	114.6	531.69	114.6	68.9126
114.6	496.525	114.6	168.254	114.6	24.7122		114.7	923.144	114.7	531.539	114.7	68.8968
114.7	496.395	114.7	168.201	114.7	24.7041		114.8	923.001	114.8	531.382	114.8	68.884
114.8	496.262	114.8	168.144	114.8	24.6963		114.9	922.853	114.9	531.233	114.9	68.8706
114.9	496.127	114.9	168.09	114.9	24.6933		115	922.712	115	531.079	115	68.8569
115	495.998	115	168.031	115	24.6865		115.1	922.56	115.1	530.927	115.1	68.8384
115.1	495.862	115.1	167.977	115.1	24.6775		115.2	922.421	115.2	530.78	115.2	68.8198
115.2	495.725	115.2	167.924	115.2	24.6699		115.3	922.279	115.3	530.627	115.3	68.8019
115.3	495.591	115.3	167.869	115.3	24.6616		115.4	922.135	115.4	530.475	115.4	68.7911
115.4	495.473	115.4	167.814	115.4	24.6544		115.5	921.991	115.5	530.327	115.5	68.7831
115.5	495.349	115.5	167.758	115.5	24.6511		115.6	921.846	115.6	530.181	115.6	68.7723
115.6	495.22	115.6	167.702	115.6	24.6484		115.7	921.701	115.7	530.038	115.7	68.7566
115.7	495.097	115.7	167.648	115.7	24.6443		115.8	921.556	115.8	529.896	115.8	68.7407
115.8	494.963	115.8	167.601	115.8	24.6367		115.9	921.402	115.9	529.75	115.9	68.7274
115.9	494.823	115.9	167.55	115.9	24.6284		116	921.251	116	529.608	116	68.7134
116	494.69	116	167.501	116	24.6247		116.1	921.106	116.1	529.459	116.1	68.6991
116.1	494.561	116.1	167.449	116.1	24.6184		116.2	920.962	116.2	529.309	116.2	68.6866
116.2	494.434	116.2	167.393	116.2	24.6099		116.3	920.813	116.3	529.166	116.3	68.6745
116.3	494.306	116.3	167.341	116.3	24.6039		116.4	920.667	116.4	529.02	116.4	68.6577
116.4	494.181	116.4	167.285	116.4	24.5978		116.5	920.529	116.5	528.877	116.5	68.6412
116.5	494.056	116.5	167.238	116.5	24.593		116.6	920.382	116.6	528.73	116.6	68.631
116.6	493.923	116.6	167.188	116.6	24.587		116.7	920.235	116.7	528.581	116.7	68.6132
116.7	493.794	116.7	167.135	116.7	24.5829		116.8	920.1	116.8	528.437	116.8	68.5999
116.8	493.67	116.8	167.087	116.8	24.5797		116.9	919.958	116.9	528.3	116.9	68.5841
116.9	493.538	116.9	167.037	116.9	24.573		117	919.817	117	528.155	117	68.572
117	493.412	117	166.98	117	24.5693		117.1	919.675	117.1	528.013	117.1	68.5542
117.1	493.289	117.1	166.932	117.1	24.5633		117.2	919.527	117.2	527.871	117.2	68.5389
117.2	493.166	117.2	166.881	117.2	24.5534		117.3	919.382	117.3	527.732	117.3	68.518
117.3	493.038	117.3	166.832	117.3	24.54		117.4	919.237	117.4	527.592	117.4	68.5018
117.4	492.912	117.4	166.781	117.4	24.5323		117.5	919.094	117.5	527.446	117.5	68.4865
117.5	492.787	117.5	166.725	117.5	24.5236		117.6	918.952	117.6	527.304	117.6	68.4698
117.6	492.665	117.6	166.675	117.6	24.5106		117.7	918.809	117.7	527.165	117.7	68.4559
117.7	492.54	117.7	166.628	117.7	24.4966		117.8	918.672	117.8	527.028	117.8	68.4401
117.8	492.415	117.8	166.585	117.8	24.4886		117.9	918.532	117.9	526.888	117.9	68.4268
117.9	492.291	117.9	166.537	117.9	24.4818		118	918.392	118	526.748	118	68.4148
118	492.169	118	166.486	118	24.475		118.1	918.249	118.1	526.609	118.1	68.4042
118.1	492.046	118.1	166.439	118.1	24.4718		118.2	918.111	118.2	526.464	118.2	68.3933
118.2	491.924	118.2	166.389	118.2	24.4688		118.3	917.969	118.3	526.321	118.3	68.382
118.3	491.808	118.3	166.339	118.3	24.4636		118.4	917.83	118.4	526.179	118.4	68.3693
118.4	491.693	118.4	166.294	118.4	24.4606		118.5	917.696	118.5	526.036	118.5	68.3573
118.5	491.581	118.5	166.247	118.5	24.4541		118.6	917.558	118.6	525.891	118.6	68.343
118.6	491.465	118.6	166.197	118.6	24.4456		118.7	917.415	118.7	525.747	118.7	68.3264
118.7	491.348	118.7	166.147	118.7	24.4365		118.8	917.274	118.8	525.609	118.8	68.3108
118.8	491.231	118.8	166.103	118.8	24.429		118.9	917.135	118.9	525.467	118.9	68.2956
118.9	491.113	118.9	166.052	118.9	24.4235		119	916.989	119	525.334	119	68.28
119	490.991	119	166.006	119	24.4168		119.1	916.846	119.1	525.197	119.1	68.2649
119.1	490.87	119.1	165.958	119.1	24.4064		119.2	916.705	119.2	525.058	119.2	68.2501
119.2	490.75	119.2	165.908	119.2	24.3993		119.3	916.565	119.3	524.922	119.3	68.2342
119.3	490.632	119.3	165.86	119.3	24.3929		119.4	916.428	119.4	524.785	119.4	68.2166
119.4	490.519	119.4	165.81	119.4	24.3847		119.5	916.29	119.5	524.646	119.5	68.2026
119.5	490.401	119.5	165.76	119.5	24.3754		119.6	916.154	119.6	524.508	119.6	68.1833
119.6	490.289	119.6	165.71	119.6	24.3599		119.7	916.018	119.7	524.375	119.7	68.1678
119.7	490.176	119.7	165.669	119.7	24.3519		119.8	915.879	119.8	524.234	119.8	68.1517
119.8	490.059	119.8	165.621	119.8	24.3499		119.9	915.741	119.9	524.089	119.9	68.1392
119.9	489.943	119.9	165.575	119.9	24.3476		120	915.605	120	523.95	120	68.1291
120	489.825	120	165.53	120	24.3464		120.1	915.47	120.1	523.809	120.1	68.1192
120.1	489.707	120.1	165.484	120.1	24.3442		120.2	915.34	120.2	523.674	120.2	68.1048
120.2	489.592	120.2	165.441	120.2	24.3369		120.3	915.203	120.3	523.544	120.3	68.0919
120.3	489.47	120.3	165.401	120.3	24.3294		120.4	915.07	120.4	523.41	120.4	68.0772
120.4	489.352	120.4	165.351	120.4	24.3231		120.5	914.933	120.5	523.275	120.5	68.0621
120.5	489.236	120.5	165.303	120.5	24.3201		120.6	914.796	120.6	523.135	120.6	68.0523
120.6	489.118	120.6	165.252	120.6	24.3167		120.7	914.657	120.7	522.997	120.7	68.0377
120.7	488.999	120.7	165.204	120.7	24.3142		120.8	914.524	120.8	522.862	120.8	68.0252
120.8	488.886	120.8	165.153	120.8	24.3095		120.9	914.386	120.9	522.729	120.9	68.0147
120.9	488.768	120.9	165.103	120.9	24.3069		121	914.251	121	522.592	121	67.998
121	488.65	121	165.051	121	24.2972		121.1	914.118	121.1	522.461	121.1	67.9832
121.1	488.529	121.1	165.005	121.1	24.294		121.2	913.989	121.2	522.334	121.2	67.9737
121.2	488.414	121.2	164.959	121.2	24.2971		121.3	913.857	121.3	522.197	121.3	67.9656
121.3	488.299	121.3	164.91	121.3	24.2951		121.4	913.727	121.4	522.059	121.4	67.9533
121.4	488.184	121.4	164.86	121.4	24.2911		121.5	913.588	121.5	521.929	121.5	67.9391
121.5	488.064	121.5	164.811	121.5	24.2866		121.6	913.451	121.6	521.796	121.6	67.9211
121.6	487.949	121.6	164.763	121.6	24.2792		121.7	913.322	121.7	521.658	121.7	67.9071
121.7	487.841	121.7	164.711	121.7	24.2708		121.8	913.192	121.8	521.524	121.8	67.8931
121.8	487.724	121.8	164.667	121.8	24.2655		121.9	913.063	121.9	521.39	121.9	67.884
121.9	487.607	121.9	164.618	121.9	24.2603		122	912.934	122	521.261	122	67.8734
122	487.492	122	164.572	122	24.2566		122.1	912.801	122.1	521.132	122.1	67.859
122.1	487.374	122.1	164.523	122.1	24.2496		122.2	912.667	122.2	521.005	122.2	67.8477
122.2	487.26	122.2	164.481	122.2	24.2446		122.3	912.531	122.3	520.881	122.3	67.8353
122.3	487.143	122.3	164.437	122.3	24.2385		122.4	912.394	122.4	520.753	122.4	67.8217
122.4	487.029	122.4	164.39	122.4	24.2328		122.5	912.259	122.5	520.619	122.5	67.8092
122.5	486.92	122.5	164.345	122.5	24.2266		122.6	912.123	122.6	520.481	122.6	67.797
122.6	486.808	122.6	164.294	122.6	24.2214		122.7	911.991	122.7	520.341	122.7	67.783
122.7	486.699	122.7	164.239	122.7	24.2163		122.8	911.857	122.8	520.205	122.8	67.7711
122.8	486.586	122.8	164.194	122.8	24.2086		122.9	911.73	122.9	520.073	122.9	67.7576
122.9	486.474	122.9	164.148	122.9	24.203		123	911.606	123	519.941	123	67.7491
123	486.366	123	164.101	123	24.1996		123.1	911.474	123.1	519.814	123.1	67.7416
123.1	486.256	123.1	164.056	123.1	24.1966		123.2	911.342	123.2	519.682	123.2	67.7344
123.2	486.149	123.2	164.008	123.2	24.1934		123.3	911.212	123.3	519.554	123.3	67.7234
123.3	486.043	123.3	163.96	123.3	24.1918		123.4	911.082	123.4	519.422	123.4	67.7151
123.4	485.933	123.4	163.908	123.4	24.1898		123.5	910.947	123.5	519.285	123.5	67.7044
123.5	485.821	123.5	163.858	123.5	24.1874		123.6	910.812	123.6	519.153	123.6	67.6936
123.6	485.715	123.6	163.814	123.6	24.1859		123.7	910.677	123.7	519.018	123.7	67.6823
123.7	485.605	123.7	163.768	123.7	24.1847		123.8	910.545	123.8	518.883	123.8	67.6706
123.8	485.494	123.8	163.719	123.8	24.1846		123.9	910.413	123.9	518.755	123.9	67.6577
123.9	485.383	123.9	163.671	123.9	24.1822		124	910.28	124	518.63	124	67.6413
124	485.27	124	163.622	124	24.1747		124.1	910.147	124.1	518.504	124.1	67.6288
124.1	485.159	124.1	163.577	124.1	24.1724		124.2	910.008	124.2	518.37	124.2	67.6144
124.2	485.051	124.2	163.533	124.2	24.1648		124.3	909.869	124.3	518.238	124.3	67.5995
124.3	484.945	124.3	163.488	124.3	24.1544		124.4	909.735	124.4	518.106	124.4	67.5879
124.4	484.837	124.4	163.44	124.4	24.1479		124.5	909.603	124.5	517.976	124.5	67.5726
124.5	484.731	124.5	163.393	124.5	24.14		124.6	909.465	124.6	517.843	124.6	67.5597
124.6	484.619	124.6	163.343	124.6	24.1338		124.7	909.329	124.7	517.717	124.7	67.5489
124.7	484.507	124.7	163.303	124.7	24.1305		124.8	909.199	124.8	517.586	124.8	67.5412
124.8	484.399	124.8	163.262	124.8	24.1256		124.9	909.071	124.9	517.449	124.9	67.53
124.9	484.294	124.9	163.212	124.9	24.122		125	908.943	125	517.324	125	67.5177
125	484.194	125	163.168	125	24.1155		125.1	908.815	125.1	517.194	125.1	67.5068
125.1	484.091	125.1	163.118	125.1	24.1133		125.2	908.682	125.2	517.065	125.2	67.4966
125.2	483.983	125.2	163.068	125.2	24.1122		125.3	908.551	125.3	516.934	125.3	67.4842
125.3	483.873	125.3	163.023	125.3	24.109		125.4	908.423	125.4	516.802	125.4	67.4735
125.4	483.768	125.4	162.98	125.4	24.1017		125.5	908.294	125.5	516.674	125.5	67.4624
125.5	483.656	125.5	162.934	125.5	24.0959		125.6	908.164	125.6	516.548	125.6	67.4499
125.6	483.544	125.6	162.892	125.6	24.0891		125.7	908.032	125.7	516.421	125.7	67.442
125.7	483.433	125.7	162.849	125.7	24.0881		125.8	907.906	125.8	516.293	125.8	67.4283
125.8	483.324	125.8	162.805	125.8	24.0811		125.9	907.783	125.9	516.171	125.9	67.4178
125.9	483.217	125.9	162.758	125.9	24.0752		126	907.659	126	516.048	126	67.4104
126	483.108	126	162.712	126	24.0677		126.1	907.533	126.1	515.926	126.1	67.3939
126.1	483.004	126.1	162.663	126.1	24.0543		126.2	907.41	126.2	515.804	126.2	67.3827
126.2	482.895	126.2	162.62	126.2	24.0471		126.3	907.288	126.3	515.678	126.3	67.3747
126.3	482.781	126.3	162.576	126.3	24.044		126.4	907.161	126.4	515.547	126.4	67.3636
126.4	482.671	126.4	162.529	126.4	24.0394		126.5	907.036	126.5	515.417	126.5	67.3539
126.5	482.565	126.5	162.485	126.5	24.0367		126.6	906.907	126.6	515.29	126.6	67.3428
126.6	482.458	126.6	162.44	126.6	24.0289		126.7	906.789	126.7	515.169	126.7	67.3273
126.7	482.355	126.7	162.397	126.7	24.0199		126.8	906.67	126.8	515.048	126.8	67.3151
126.8	482.255	126.8	162.35	126.8	24.0111		126.9	906.546	126.9	514.923	126.9	67.3032
126.9	482.147	126.9	162.306	126.9	24.0038		127	906.43	127	514.799	127	67.2912
127	482.046	127	162.261	127	23.9994		127.1	906.302	127.1	514.675	127.1	67.2784
127.1	481.942	127.1	162.219	127.1	23.9957		127.2	906.179	127.2	514.547	127.2	67.2651
127.2	481.84	127.2	162.174	127.2	23.9885		127.3	906.05	127.3	514.427	127.3	67.2505
127.3	481.734	127.3	162.129	127.3	23.9796		127.4	905.924	127.4	514.309	127.4	67.2348
127.4	481.633	127.4	162.083	127.4	23.9746		127.5	905.797	127.5	514.182	127.5	67.22
127.5	481.532	127.5	162.036	127.5	23.9708		127.6	905.673	127.6	514.055	127.6	67.2065
127.6	481.429	127.6	161.992	127.6	23.9624		127.7	905.548	127.7	513.931	127.7	67.1956
127.7	481.326	127.7	161.946	127.7	23.9574		127.8	905.417	127.8	513.816	127.8	67.1757
127.8	481.218	127.8	161.905	127.8	23.9502		127.9	905.289	127.9	513.701	127.9	67.1623
127.9	481.111	127.9	161.863	127.9	23.9431		128	905.164	128	513.577	128	67.1462
128	481.012	128	161.816	128	23.9381		128.1	905.037	128.1	513.457	128.1	67.132
128.1	480.91	128.1	161.77	128.1	23.9336		128.2	904.913	128.2	513.334	128.2	67.1226
128.2	480.807	128.2	161.729	128.2	23.9281		128.3	904.788	128.3	513.217	128.3	67.1078
128.3	480.702	128.3	161.685	128.3	23.924		128.4	904.662	128.4	513.097	128.4	67.0973
128.4	480.599	128.4	161.639	128.4	23.9224		128.5	904.538	128.5	512.977	128.5	67.0896
128.5	480.497	128.5	161.596	128.5	23.9183		128.6	904.414	128.6	512.858	128.6	67.0795
128.6	480.393	128.6	161.555	128.6	23.9117		128.7	904.286	128.7	512.738	128.7	67.0686
128.7	480.294	128.7	161.513	128.7	23.9042		128.8	904.156	128.8	512.623	128.8	67.0528
128.8	480.195	128.8	161.477	128.8	23.8943		128.9	904.038	128.9	512.505	128.9	67.0435
128.9	480.098	128.9	161.435	128.9	23.8894		129	903.922	129	512.386	129	67.0311
129	480.001	129	161.389	129	23.8826		129.1	903.803	129.1	512.272	129.1	67.0147
129.1	479.904	129.1	161.347	129.1	23.8784		129.2	903.679	129.2	512.151	129.2	66.9972
129.2	479.803	129.2	161.306	129.2	23.8722		129.3	903.553	129.3	512.033	129.3	66.9871
129.3	479.702	129.3	161.262	129.3	23.864		129.4	903.432	129.4	511.911	129.4	66.9773
129.4	479.608	129.4	161.215	129.4	23.8592		129.5	903.316	129.5	511.79	129.5	66.9627
129.5	479.514	129.5	161.174	129.5	23.8536		129.6	903.196	129.6	511.672	129.6	66.95
129.6	479.414	129.6	161.132	129.6	23.8466		129.7	903.073	129.7	511.554	129.7	66.9332
129.7	479.31	129.7	161.086	129.7	23.8368		129.8	902.957	129.8	511.434	129.8	66.9205
129.8	479.209	129.8	161.045	129.8	23.8326		129.9	902.837	129.9	511.316	129.9	66.9073
129.9	479.112	129.9	161.005	129.9	23.8261		130	902.724	130	511.197	130	66.8926
130	479.012	130	160.962	130	23.818		130.1	902.602	130.1	511.078	130.1	66.8815
130.1	478.91	130.1	160.921	130.1	23.8122		130.2	902.487	130.2	510.956	130.2	66.8655
130.2	478.81	130.2	160.876	130.2	23.8022		130.3	902.374	130.3	510.841	130.3	66.8545
130.3	478.711	130.3	160.833	130.3	23.7979		130.4	902.258	130.4	510.724	130.4	66.8462
130.4	478.607	130.4	160.792	130.4	23.7943		130.5	902.143	130.5	510.609	130.5	66.8311
130.5	478.504	130.5	160.751	130.5	23.7887		130.6	902.022	130.6	510.495	130.6	66.8191
130.6	478.403	130.6	160.71	130.6	23.783		130.7	901.903	130.7	510.377	130.7	66.8079
130.7	478.303	130.7	160.669	130.7	23.7808		130.8	901.781	130.8	510.261	130.8	66.7957
130.8	478.204	130.8	160.626	130.8	23.7772		130.9	901.661	130.9	510.145	130.9	66.7826
130.9	478.106	130.9	160.587	130.9	23.776		131	901.539	131	510.028	131	66.7643
131	478.003	131	160.547	131	23.7664		131.1	901.412	131.1	509.906	131.1	66.7518
131.1	477.901	131.1	160.507	131.1	23.7623		131.2	901.289	131.2	509.789	131.2	66.7373
131.2	477.805	131.2	160.465	131.2	23.753		131.3	901.174	131.3	509.671	131.3	66.7245
131.3	477.71	131.3	160.422	131.3	23.7477		131.4	901.055	131.4	509.552	131.4	66.7139
131.4	477.615	131.4	160.383	131.4	23.7421		131.5	900.933	131.5	509.434	131.5	66.705
131.5	477.516	131.5	160.341	131.5	23.7436		131.6	900.808	131.6	509.317	131.6	66.6954
131.6	477.418	131.6	160.301	131.6	23.7407		131.7	900.692	131.7	509.194	131.7	66.6861
131.7	477.329	131.7	160.258	131.7	23.7405		131.8	900.577	131.8	509.075	131.8	66.679
131.8	477.236	131.8	160.215	131.8	23.739		131.9	900.456	131.9	508.958	131.9	66.6689
131.9	477.144	131.9	160.169	131.9	23.7345		132	900.343	132	508.842	132	66.6581
132	477.052	132	160.128	132	23.7283		132.1	900.225	132.1	508.729	132.1	66.644
132.1	476.956	132.1	160.088	132.1	23.7242		132.2	900.109	132.2	508.616	132.2	66.6363
132.2	476.86	132.2	160.049	132.2	23.7211		132.3	899.996	132.3	508.5	132.3	66.6242
132.3	476.767	132.3	160.007	132.3	23.7179		132.4	899.874	132.4	508.382	132.4	66.6088
132.4	476.667	132.4	159.964	132.4	23.7116		132.5	899.754	132.5	508.273	132.5	66.5966
132.5	476.572	132.5	159.925	132.5	23.708		132.6	899.634	132.6	508.156	132.6	66.5822
132.6	476.479	132.6	159.884	132.6	23.7001		132.7	899.511	132.7	508.045	132.7	66.5694
132.7	476.384	132.7	159.846	132.7	23.6958		132.8	899.382	132.8	507.936	132.8	66.5557
132.8	476.281	132.8	159.809	132.8	23.6908		132.9	899.263	132.9	507.82	132.9	66.5443
132.9	476.181	132.9	159.774	132.9	23.6888		133	899.146	133	507.709	133	66.5348
133	476.087	133	159.739	133	23.6867		133.1	899.025	133.1	507.6	133.1	66.5242
133.1	475.991	133.1	159.707	133.1	23.6821		133.2	898.904	133.2	507.487	133.2	66.5171
133.2	475.896	133.2	159.67	133.2	23.6793		133.3	898.79	133.3	507.375	133.3	66.505
133.3	475.807	133.3	159.638	133.3	23.6748		133.4	898.674	133.4	507.252	133.4	66.4942
133.4	475.722	133.4	159.602	133.4	23.6708		133.5	898.559	133.5	507.133	133.5	66.4853
133.5	475.625	133.5	159.565	133.5	23.666		133.6	898.442	133.6	507.022	133.6	66.478
133.6	475.529	133.6	159.531	133.6	23.6588		133.7	898.324	133.7	506.905	133.7	66.4655
133.7	475.434	133.7	159.491	133.7	23.6575		133.8	898.21	133.8	506.791	133.8	66.4508
133.8	475.343	133.8	159.455	133.8	23.6503		133.9	898.095	133.9	506.681	133.9	66.4426
133.9	475.252	133.9	159.416	133.9	23.6466		134	897.981	134	506.57	134	66.4338
134	475.159	134	159.376	134	23.6445		134.1	897.869	134.1	506.458	134.1	66.4279
134.1	475.065	134.1	159.34	134.1	23.6428		134.2	897.757	134.2	506.35	134.2	66.416
134.2	474.972	134.2	159.304	134.2	23.6394		134.3	897.648	134.3	506.242	134.3	66.4022
134.3	474.885	134.3	159.265	134.3	23.6354		134.4	897.542	134.4	506.134	134.4	66.3927
134.4	474.792	134.4	159.228	134.4	23.6288		134.5	897.429	134.5	506.023	134.5	66.3807
134.5	474.701	134.5	159.189	134.5	23.6245		134.6	897.316	134.6	505.916	134.6	66.3681
134.6	474.611	134.6	159.154	134.6	23.6193		134.7	897.196	134.7	505.806	134.7	66.3541
134.7	474.524	134.7	159.119	134.7	23.615		134.8	897.08	134.8	505.696	134.8	66.3438
134.8	474.432	134.8	159.084	134.8	23.6083		134.9	896.967	134.9	505.579	134.9	66.3327
134.9	474.339	134.9	159.042	134.9	23.6086		135	896.857	135	505.465	135	66.3172
135	474.246	135	159.001	135	23.6049		135.1	896.744	135.1	505.355	135.1	66.3057
135.1	474.156	135.1	158.967	135.1	23.5978		135.2	896.632	135.2	505.242	135.2	66.2965
135.2	474.065	135.2	158.929	135.2	23.5903		135.3	896.521	135.3	505.135	135.3	66.2924
135.3	473.976	135.3	158.892	135.3	23.5905		135.4	896.408	135.4	505.021	135.4	66.2834
135.4	473.881	135.4	158.854	135.4	23.5887		135.5	896.296	135.5	504.912	135.5	66.2709
135.5	473.783	135.5	158.82	135.5	23.5845		135.6	896.183	135.6	504.804	135.6	66.2575
135.6	473.691	135.6	158.787	135.6	23.5794		135.7	896.069	135.7	504.702	135.7	66.2477
135.7	473.605	135.7	158.75	135.7	23.5769		135.8	895.951	135.8	504.602	135.8	66.2382
135.8	473.516	135.8	158.713	135.8	23.5728		135.9	895.832	135.9	504.489	135.9	66.2264
135.9	473.423	135.9	158.677	135.9	23.5651		136	895.717	136	504.372	136	66.2164
136	473.333	136	158.639	136	23.5617		136.1	895.606	136.1	504.265	136.1	66.2069
136.1	473.248	136.1	158.602	136.1	23.5567		136.2	895.498	136.2	504.165	136.2	66.1965
136.2	473.163	136.2	158.568	136.2	23.5521		136.3	895.382	136.3	504.064	136.3	66.1888
136.3	473.072	136.3	158.531	136.3	23.5498		136.4	895.272	136.4	503.958	136.4	66.1756
136.4	472.983	136.4	158.494	136.4	23.5414		136.5	895.16	136.5	503.853	136.5	66.1649
136.5	472.896	136.5	158.453	136.5	23.5398		136.6	895.044	136.6	503.744	136.6	66.1557
136.6	472.809	136.6	158.415	136.6	23.5351		136.7	894.938	136.7	503.629	136.7	66.1463
136.7	472.72	136.7	158.376	136.7	23.5356		136.8	894.828	136.8	503.519	136.8	66.1305
136.8	472.629	136.8	158.343	136.8	23.5264		136.9	894.714	136.9	503.412	136.9	66.1206
136.9	472.538	136.9	158.308	136.9	23.5222		137	894.6	137	503.301	137	66.1119
137	472.454	137	158.269	137	23.5194		137.1	894.488	137.1	503.191	137.1	66.1059
137.1	472.374	137.1	158.231	137.1	23.5161		137.2	894.374	137.2	503.08	137.2	66.0948
137.2	472.286	137.2	158.192	137.2	23.5134		137.3	894.265	137.3	502.964	137.3	66.0888
137.3	472.196	137.3	158.151	137.3	23.5126		137.4	894.15	137.4	502.862	137.4	66.08
137.4	472.106	137.4	158.117	137.4	23.5084		137.5	894.046	137.5	502.757	137.5	66.0732
137.5	472.017	137.5	158.081	137.5	23.5056		137.6	893.942	137.6	502.647	137.6	66.0638
137.6	471.932	137.6	158.044	137.6	23.4995		137.7	893.832	137.7	502.542	137.7	66.0551
137.7	471.849	137.7	158.01	137.7	23.4983		137.8	893.713	137.8	502.44	137.8	66.0429
137.8	471.762	137.8	157.978	137.8	23.4907		137.9	893.596	137.9	502.339	137.9	66.029
137.9	471.673	137.9	157.944	137.9	23.4836		138	893.482	138	502.233	138	66.0178
138	471.584	138	157.907	138	23.4788		138.1	893.364	138.1	502.129	138.1	66.0022
138.1	471.498	138.1	157.871	138.1	23.4778		138.2	893.25	138.2	502.027	138.2	65.9941
138.2	471.409	138.2	157.836	138.2	23.4734		138.3	893.139	138.3	501.917	138.3	65.9817
138.3	471.321	138.3	157.799	138.3	23.4709		138.4	893.035	138.4	501.808	138.4	65.9678
138.4	471.231	138.4	157.762	138.4	23.4648		138.5	892.927	138.5	501.706	138.5	65.9554
138.5	471.148	138.5	157.726	138.5	23.4584		138.6	892.823	138.6	501.599	138.6	65.9428
138.6	471.059	138.6	157.687	138.6	23.4516		138.7	892.721	138.7	501.495	138.7	65.9343
138.7	470.973	138.7	157.65	138.7	23.4504		138.8	892.615	138.8	501.383	138.8	65.9257
138.8	470.892	138.8	157.612	138.8	23.4469		138.9	892.503	138.9	501.278	138.9	65.9209
138.9	470.808	138.9	157.574	138.9	23.4457		139	892.39	139	501.176	139	65.9094
139	470.722	139	157.534	139	23.44		139.1	892.284	139.1	501.074	139.1	65.8945
139.1	470.637	139.1	157.494	139.1	23.4336		139.2	892.174	139.2	500.967	139.2	65.8787
139.2	470.549	139.2	157.452	139.2	23.4295		139.3	892.067	139.3	500.859	139.3	65.868
139.3	470.462	139.3	157.418	139.3	23.425		139.4	891.955	139.4	500.749	139.4	65.863
139.4	470.375	139.4	157.378	139.4	23.4205		139.5	891.849	139.5	500.643	139.5	65.8549
139.5	470.29	139.5	157.342	139.5	23.4148		139.6	891.74	139.6	500.537	139.6	65.8419
139.6	470.206	139.6	157.303	139.6	23.4073		139.7	891.637	139.7	500.436	139.7	65.8271
139.7	470.124	139.7	157.263	139.7	23.4014		139.8	891.533	139.8	500.328	139.8	65.8171
139.8	470.041	139.8	157.225	139.8	23.3952		139.9	891.427	139.9	500.22	139.9	65.8085
139.9	469.956	139.9	157.186	139.9	23.3906		140	891.317	140	500.12	140	65.7995
140	469.869	140	157.152	140	23.3874		140.1	891.205	140.1	500.019	140.1	65.7887
140.1	469.785	140.1	157.118	140.1	23.38		140.2	891.09	140.2	499.92	140.2	65.7773
140.2	469.7	140.2	157.082	140.2	23.3735		140.3	890.985	140.3	499.819	140.3	65.769
140.3	469.618	140.3	157.043	140.3	23.3695		140.4	890.878	140.4	499.714	140.4	65.7617
140.4	469.539	140.4	157.006	140.4	23.3684		140.5	890.764	140.5	499.607	140.5	65.7535
140.5	469.455	140.5	156.965	140.5	23.3659		140.6	890.654	140.6	499.504	140.6	65.7448
140.6	469.372	140.6	156.929	140.6	23.3586		140.7	890.546	140.7	499.4	140.7	65.7356
140.7	469.286	140.7	156.893	140.7	23.3524		140.8	890.442	140.8	499.295	140.8	65.7297
140.8	469.2	140.8	156.857	140.8	23.3509		140.9	890.339	140.9	499.19	140.9	65.717
140.9	469.12	140.9	156.821	140.9	23.348		141	890.235	141	499.084	141	65.709
141	469.038	141	156.783	141	23.3406		141.1	890.129	141.1	498.977	141.1	65.7027
141.1	468.955	141.1	156.748	141.1	23.334		141.2	890.022	141.2	498.871	141.2	65.6994
141.2	468.873	141.2	156.711	141.2	23.3357		141.3	889.915	141.3	498.775	141.3	65.6914
141.3	468.791	141.3	156.678	141.3	23.329		141.4	889.808	141.4	498.677	141.4	65.68
141.4	468.703	141.4	156.641	141.4	23.3203		141.5	889.701	141.5	498.576	141.5	65.6638
141.5	468.621	141.5	156.606	141.5	23.3122		141.6	889.592	141.6	498.475	141.6	65.6506
141.6	468.541	141.6	156.574	141.6	23.3033		141.7	889.487	141.7	498.375	141.7	65.6449
141.7	468.462	141.7	156.539	141.7	23.2988		141.8	889.386	141.8	498.267	141.8	65.6373
141.8	468.382	141.8	156.499	141.8	23.2958		141.9	889.281	141.9	498.161	141.9	65.631
141.9	468.298	141.9	156.461	141.9	23.2948		142	889.181	142	498.058	142	65.6259
142	468.217	142	156.424	142	23.2927		142.1	889.078	142.1	497.954	142.1	65.6154
142.1	468.14	142.1	156.386	142.1	23.2852		142.2	888.977	142.2	497.849	142.2	65.6072
142.2	468.06	142.2	156.352	142.2	23.2801		142.3	888.873	142.3	497.75	142.3	65.6016
142.3	467.979	142.3	156.314	142.3	23.2815		142.4	888.768	142.4	497.652	142.4	65.5907
142.4	467.897	142.4	156.278	142.4	23.2752		142.5	888.662	142.5	497.555	142.5	65.5816
142.5	467.819	142.5	156.247	142.5	23.2766		142.6	888.555	142.6	497.46	142.6	65.5755
142.6	467.736	142.6	156.216	142.6	23.2735		142.7	888.45	142.7	497.359	142.7	65.5666
142.7	467.651	142.7	156.181	142.7	23.2708		142.8	888.341	142.8	497.255	142.8	65.5572
142.8	467.567	142.8	156.145	142.8	23.2671		142.9	888.23	142.9	497.156	142.9	65.5512
142.9	467.488	142.9	156.108	142.9	23.2659		143	888.12	143	497.051	143	65.5389
143	467.404	143	156.071	143	23.2585		143.1	888.017	143.1	496.949	143.1	65.5269
143.1	467.324	143.1	156.04	143.1	23.2488		143.2	887.914	143.2	496.847	143.2	65.521
143.2	467.248	143.2	156.007	143.2	23.2502		143.3	887.814	143.3	496.744	143.3	65.5118
143.3	467.168	143.3	155.973	143.3	23.2443		143.4	887.712	143.4	496.653	143.4	65.502
143.4	467.09	143.4	155.947	143.4	23.2423		143.5	887.61	143.5	496.562	143.5	65.492
143.5	467.015	143.5	155.915	143.5	23.2402		143.6	887.507	143.6	496.459	143.6	65.4805
143.6	466.938	143.6	155.88	143.6	23.2373		143.7	887.4	143.7	496.363	143.7	65.4707
143.7	466.858	143.7	155.846	143.7	23.2337		143.8	887.295	143.8	496.265	143.8	65.46
143.8	466.779	143.8	155.811	143.8	23.2272		143.9	887.189	143.9	496.165	143.9	65.4522
143.9	466.7	143.9	155.771	143.9	23.2228		144	887.08	144	496.062	144	65.4399
144	466.622	144	155.731	144	23.2155		144.1	886.977	144.1	495.959	144.1	65.4281
144.1	466.546	144.1	155.695	144.1	23.2102		144.2	886.873	144.2	495.859	144.2	65.4224
144.2	466.47	144.2	155.662	144.2	23.2024		144.3	886.766	144.3	495.76	144.3	65.4129
144.3	466.392	144.3	155.627	144.3	23.2		144.4	886.656	144.4	495.66	144.4	65.4044
144.4	466.31	144.4	155.594	144.4	23.1961		144.5	886.55	144.5	495.561	144.5	65.4011
144.5	466.231	144.5	155.562	144.5	23.1937		144.6	886.447	144.6	495.464	144.6	65.3955
144.6	466.149	144.6	155.527	144.6	23.1921		144.7	886.348	144.7	495.37	144.7	65.3903
144.7	466.069	144.7	155.496	144.7	23.1909		144.8	886.241	144.8	495.274	144.8	65.3816
144.8	465.988	144.8	155.466	144.8	23.1881		144.9	886.14	144.9	495.176	144.9	65.3732
144.9	465.911	144.9	155.429	144.9	23.1833		145	886.039	145	495.077	145	65.3617
145	465.832	145	155.396	145	23.1802		145.1	885.936	145.1	494.978	145.1	65.3561
145.1	465.755	145.1	155.361	145.1	23.1774		145.2	885.835	145.2	494.881	145.2	65.348
145.2	465.679	145.2	155.332	145.2	23.1756		145.3	885.732	145.3	494.783	145.3	65.3404
145.3	465.605	145.3	155.301	145.3	23.1717		145.4	885.634	145.4	494.687	145.4	65.3336
145.4	465.53	145.4	155.266	145.4	23.1677		145.5	885.536	145.5	494.593	145.5	65.3221
145.5	465.452	145.5	155.234	145.5	23.1619		145.6	885.433	145.6	494.497	145.6	65.3078
145.6	465.377	145.6	155.202	145.6	23.1548		145.7	885.33	145.7	494.402	145.7	65.2995
145.7	465.298	145.7	155.173	145.7	23.1549		145.8	885.227	145.8	494.306	145.8	65.2928
145.8	465.219	145.8	155.141	145.8	23.1508		145.9	885.125	145.9	494.213	145.9	65.2864
145.9	465.143	145.9	155.111	145.9	23.1475		146	885.022	146	494.123	146	65.2768
146	465.067	146	155.084	146	23.1435		146.1	884.922	146.1	494.03	146.1	65.2657
146.1	464.993	146.1	155.051	146.1	23.1372		146.2	884.824	146.2	493.935	146.2	65.2548
146.2	464.916	146.2	155.018	146.2	23.1353		146.3	884.727	146.3	493.846	146.3	65.2425
146.3	464.839	146.3	154.986	146.3	23.1326		146.4	884.627	146.4	493.759	146.4	65.2312
146.4	464.762	146.4	154.956	146.4	23.1256		146.5	884.525	146.5	493.663	146.5	65.2221
146.5	464.682	146.5	154.923	146.5	23.1203		146.6	884.425	146.6	493.563	146.6	65.2109
146.6	464.606	146.6	154.893	146.6	23.1135		146.7	884.326	146.7	493.464	146.7	65.1973
146.7	464.527	146.7	154.865	146.7	23.1086		146.8	884.225	146.8	493.362	146.8	65.1895
146.8	464.446	146.8	154.832	146.8	23.1056		146.9	884.121	146.9	493.27	146.9	65.1818
146.9	464.363	146.9	154.8	146.9	23.1034		147	884.019	147	493.174	147	65.1759
147	464.285	147	154.761	147	23.1046		147.1	883.921	147.1	493.087	147.1	65.1689
147.1	464.211	147.1	154.736	147.1	23.1025		147.2	883.827	147.2	492.996	147.2	65.158
147.2	464.137	147.2	154.704	147.2	23.0985		147.3	883.731	147.3	492.902	147.3	65.1406
147.3	464.066	147.3	154.671	147.3	23.0879		147.4	883.637	147.4	492.805	147.4	65.1313
147.4	463.99	147.4	154.639	147.4	23.0891		147.5	883.539	147.5	492.71	147.5	65.12
147.5	463.915	147.5	154.603	147.5	23.0844		147.6	883.442	147.6	492.614	147.6	65.1119
147.6	463.837	147.6	154.569	147.6	23.0783		147.7	883.342	147.7	492.516	147.7	65.1029
147.7	463.759	147.7	154.53	147.7	23.0759		147.8	883.241	147.8	492.421	147.8	65.0896
147.8	463.687	147.8	154.497	147.8	23.0733		147.9	883.136	147.9	492.332	147.9	65.0789
147.9	463.614	147.9	154.464	147.9	23.068		148	883.035	148	492.242	148	65.0687
148	463.54	148	154.433	148	23.0631		148.1	882.932	148.1	492.152	148.1	65.0561
148.1	463.465	148.1	154.405	148.1	23.0564		148.2	882.829	148.2	492.065	148.2	65.047
148.2	463.383	148.2	154.378	148.2	23.0561		148.3	882.732	148.3	491.977	148.3	65.0371
148.3	463.304	148.3	154.344	148.3	23.0546		148.4	882.637	148.4	491.883	148.4	65.0307
148.4	463.232	148.4	154.312	148.4	23.0504		148.5	882.538	148.5	491.789	148.5	65.0263
148.5	463.155	148.5	154.281	148.5	23.0478		148.6	882.442	148.6	491.693	148.6	65.0175
148.6	463.076	148.6	154.244	148.6	23.0395		148.7	882.348	148.7	491.6	148.7	65.0046
148.7	463	148.7	154.211	148.7	23.0294		148.8	882.254	148.8	491.512	148.8	64.9949
148.8	462.924	148.8	154.179	148.8	23.0272		148.9	882.154	148.9	491.425	148.9	64.9836
148.9	462.854	148.9	154.147	148.9	23.0182		149	882.049	149	491.334	149	64.9744
149	462.777	149	154.113	149	23.016		149.1	881.95	149.1	491.243	149.1	64.9675
149.1	462.701	149.1	154.08	149.1	23.0172		149.2	881.857	149.2	491.152	149.2	64.9596
149.2	462.626	149.2	154.05	149.2	23.0155		149.3	881.761	149.3	491.058	149.3	64.9494
149.3	462.552	149.3	154.021	149.3	23.0088		149.4	881.668	149.4	490.962	149.4	64.9403
149.4	462.48	149.4	153.988	149.4	23.0067		149.5	881.571	149.5	490.86	149.5	64.9307
149.5	462.41	149.5	153.955	149.5	22.9993		149.6	881.468	149.6	490.763	149.6	64.9246
149.6	462.338	149.6	153.92	149.6	22.9929		149.7	881.371	149.7	490.672	149.7	64.9136
149.7	462.263	149.7	153.887	149.7	22.986		149.8	881.276	149.8	490.583	149.8	64.9075
149.8	462.191	149.8	153.858	149.8	22.9804		149.9	881.177	149.9	490.492	149.9	64.8996
149.9	462.117	149.9	153.826	149.9	22.9748		150	881.084	150	490.408	150	64.8915
150	462.042	150	153.798	150	22.9728		150.1	880.992	150.1	490.327	150.1	64.886
150.1	461.969	150.1	153.768	150.1	22.9745		150.2	880.891	150.2	490.24	150.2	64.8795
150.2	461.892	150.2	153.739	150.2	22.9714		150.3	880.796	150.3	490.155	150.3	64.8736
150.3	461.819	150.3	153.708	150.3	22.9686		150.4	880.703	150.4	490.065	150.4	64.8611
150.4	461.746	150.4	153.675	150.4	22.9645		150.5	880.605	150.5	489.977	150.5	64.8493
150.5	461.675	150.5	153.642	150.5	22.961		150.6	880.504	150.6	489.885	150.6	64.8377
150.6	461.599	150.6	153.609	150.6	22.9579		150.7	880.406	150.7	489.791	150.7	64.8289
150.7	461.525	150.7	153.577	150.7	22.9555		150.8	880.312	150.8	489.698	150.8	64.8174
150.8	461.457	150.8	153.545	150.8	22.9484		150.9	880.223	150.9	489.607	150.9	64.8077
150.9	461.389	150.9	153.514	150.9	22.9398		151	880.129	151	489.513	151	64.7971
151	461.319	151	153.48	151	22.9358		151.1	880.036	151.1	489.421	151.1	64.7882
151.1	461.246	151.1	153.449	151.1	22.9315		151.2	879.94	151.2	489.331	151.2	64.7749
151.2	461.171	151.2	153.422	151.2	22.9273		151.3	879.849	151.3	489.244	151.3	64.766
151.3	461.099	151.3	153.393	151.3	22.9209		151.4	879.759	151.4	489.154	151.4	64.7582
151.4	461.023	151.4	153.368	151.4	22.9158		151.5	879.661	151.5	489.063	151.5	64.7449
151.5	460.943	151.5	153.338	151.5	22.911		151.6	879.56	151.6	488.971	151.6	64.7344
151.6	460.87	151.6	153.31	151.6	22.9072		151.7	879.463	151.7	488.878	151.7	64.7253
151.7	460.795	151.7	153.278	151.7	22.9045		151.8	879.371	151.8	488.784	151.8	64.7135
151.8	460.724	151.8	153.247	151.8	22.8971		151.9	879.275	151.9	488.69	151.9	64.7056
151.9	460.653	151.9	153.219	151.9	22.8951		152	879.173	152	488.601	152	64.6956
152	460.584	152	153.189	152	22.8928		152.1	879.075	152.1	488.511	152.1	64.688
152.1	460.512	152.1	153.157	152.1	22.8899		152.2	878.985	152.2	488.421	152.2	64.6827
152.2	460.442	152.2	153.127	152.2	22.8892		152.3	878.894	152.3	488.328	152.3	64.6776
152.3	460.372	152.3	153.093	152.3	22.884		152.4	878.797	152.4	488.239	152.4	64.6696
152.4	460.304	152.4	153.063	152.4	22.8778		152.5	878.702	152.5	488.145	152.5	64.6638
152.5	460.229	152.5	153.031	152.5	22.8759		152.6	878.605	152.6	488.06	152.6	64.6538
152.6	460.156	152.6	153.001	152.6	22.873		152.7	878.509	152.7	487.975	152.7	64.6464
152.7	460.084	152.7	152.972	152.7	22.8702		152.8	878.412	152.8	487.893	152.8	64.6428
152.8	460.015	152.8	152.94	152.8	22.8692		152.9	878.317	152.9	487.811	152.9	64.6325
152.9	459.949	152.9	152.909	152.9	22.8672		153	878.227	153	487.726	153	64.6195
153	459.883	153	152.879	153	22.8595		153.1	878.132	153.1	487.638	153.1	64.6108
153.1	459.818	153.1	152.852	153.1	22.8539		153.2	878.039	153.2	487.548	153.2	64.6041
153.2	459.746	153.2	152.816	153.2	22.8525		153.3	877.947	153.3	487.46	153.3	64.5956
153.3	459.674	153.3	152.78	153.3	22.8513		153.4	877.851	153.4	487.375	153.4	64.5897
153.4	459.604	153.4	152.75	153.4	22.8499		153.5	877.756	153.5	487.288	153.5	64.5805
153.5	459.536	153.5	152.719	153.5	22.8452		153.6	877.658	153.6	487.199	153.6	64.5709
153.6	459.462	153.6	152.688	153.6	22.8407		153.7	877.559	153.7	487.111	153.7	64.5646
153.7	459.387	153.7	152.657	153.7	22.8428		153.8	877.468	153.8	487.027	153.8	64.5566
153.8	459.321	153.8	152.63	153.8	22.8374		153.9	877.372	153.9	486.94	153.9	64.5534
153.9	459.25	153.9	152.601	153.9	22.8343		154	877.282	154	486.849	154	64.5502
154	459.178	154	152.57	154	22.8302		154.1	877.191	154.1	486.764	154.1	64.5428
154.1	459.111	154.1	152.542	154.1	22.829		154.2	877.097	154.2	486.678	154.2	64.5355
154.2	459.042	154.2	152.511	154.2	22.8264		154.3	877.003	154.3	486.588	154.3	64.5249
154.3	458.971	154.3	152.481	154.3	22.8209		154.4	876.908	154.4	486.494	154.4	64.516
154.4	458.9	154.4	152.451	154.4	22.8165		154.5	876.817	154.5	486.405	154.5	64.5052
154.5	458.826	154.5	152.42	154.5	22.8101		154.6	876.724	154.6	486.319	154.6	64.4922
154.6	458.757	154.6	152.392	154.6	22.8084		154.7	876.631	154.7	486.238	154.7	64.4861
154.7	458.691	154.7	152.365	154.7	22.8087		154.8	876.54	154.8	486.148	154.8	64.479
154.8	458.623	154.8	152.337	154.8	22.8095		154.9	876.449	154.9	486.056	154.9	64.4708
154.9	458.554	154.9	152.306	154.9	22.8023		155	876.362	155	485.964	155	64.4596
155	458.484	155	152.275	155	22.7991		155.1	876.277	155.1	485.876	155.1	64.4532
155.1	458.419	155.1	152.244	155.1	22.7942		155.2	876.187	155.2	485.795	155.2	64.4464
155.2	458.351	155.2	152.216	155.2	22.7869		155.3	876.092	155.3	485.709	155.3	64.4388
155.3	458.279	155.3	152.181	155.3	22.7838		155.4	876.001	155.4	485.625	155.4	64.4277
155.4	458.211	155.4	152.148	155.4	22.7784		155.5	875.91	155.5	485.538	155.5	64.4227
155.5	458.144	155.5	152.117	155.5	22.7752		155.6	875.813	155.6	485.448	155.6	64.4134
155.6	458.075	155.6	152.086	155.6	22.7749		155.7	875.721	155.7	485.361	155.7	64.4058
155.7	458.009	155.7	152.056	155.7	22.7725		155.8	875.628	155.8	485.278	155.8	64.3977
155.8	457.943	155.8	152.031	155.8	22.7712		155.9	875.534	155.9	485.192	155.9	64.3862
155.9	457.875	155.9	152.002	155.9	22.769		156	875.441	156	485.104	156	64.3753
156	457.809	156	151.973	156	22.7648		156.1	875.347	156.1	485.023	156.1	64.3633
156.1	457.739	156.1	151.943	156.1	22.7589		156.2	875.25	156.2	484.94	156.2	64.3518
156.2	457.67	156.2	151.918	156.2	22.7534		156.3	875.163	156.3	484.852	156.3	64.3466
156.3	457.605	156.3	151.886	156.3	22.7523		156.4	875.074	156.4	484.764	156.4	64.3378
156.4	457.54	156.4	151.856	156.4	22.7514		156.5	874.982	156.5	484.678	156.5	64.3287
156.5	457.476	156.5	151.826	156.5	22.7468		156.6	874.892	156.6	484.593	156.6	64.3211
156.6	457.41	156.6	151.799	156.6	22.7426		156.7	874.805	156.7	484.507	156.7	64.3118
156.7	457.346	156.7	151.774	156.7	22.7387		156.8	874.718	156.8	484.426	156.8	64.3048
156.8	457.281	156.8	151.744	156.8	22.7345		156.9	874.624	156.9	484.34	156.9	64.2971
156.9	457.212	156.9	151.712	156.9	22.7347		157	874.53	157	484.255	157	64.2915
157	457.143	157	151.678	157	22.7337		157.1	874.435	157.1	484.173	157.1	64.2863
157.1	457.071	157.1	151.651	157.1	22.7338		157.2	874.344	157.2	484.089	157.2	64.2803
157.2	457.008	157.2	151.622	157.2	22.732		157.3	874.253	157.3	484.005	157.3	64.2758
157.3	456.941	157.3	151.593	157.3	22.73		157.4	874.154	157.4	483.92	157.4	64.264
157.4	456.869	157.4	151.56	157.4	22.7264		157.5	874.059	157.5	483.835	157.5	64.2552
157.5	456.8	157.5	151.524	157.5	22.7244		157.6	873.97	157.6	483.749	157.6	64.249
157.6	456.738	157.6	151.489	157.6	22.721		157.7	873.881	157.7	483.668	157.7	64.2401
157.7	456.674	157.7	151.456	157.7	22.7195		157.8	873.79	157.8	483.589	157.8	64.2364
157.8	456.609	157.8	151.425	157.8	22.7219		157.9	873.696	157.9	483.507	157.9	64.2351
157.9	456.537	157.9	151.392	157.9	22.7216		158	873.6	158	483.426	158	64.2275
158	456.47	158	151.363	158	22.7195		158.1	873.507	158.1	483.339	158.1	64.2231
158.1	456.404	158.1	151.327	158.1	22.7162		158.2	873.417	158.2	483.255	158.2	64.2174
158.2	456.337	158.2	151.296	158.2	22.7143		158.3	873.321	158.3	483.174	158.3	64.2066
158.3	456.268	158.3	151.266	158.3	22.7065		158.4	873.229	158.4	483.096	158.4	64.1968
158.4	456.206	158.4	151.239	158.4	22.7029		158.5	873.142	158.5	483.016	158.5	64.1921
158.5	456.14	158.5	151.211	158.5	22.7036		158.6	873.052	158.6	482.932	158.6	64.1797
158.6	456.077	158.6	151.18	158.6	22.6966		158.7	872.969	158.7	482.85	158.7	64.1656
158.7	456.019	158.7	151.154	158.7	22.6859		158.8	872.88	158.8	482.761	158.8	64.1585
158.8	455.958	158.8	151.124	158.8	22.6815		158.9	872.796	158.9	482.679	158.9	64.1475
158.9	455.899	158.9	151.097	158.9	22.6754		159	872.709	159	482.593	159	64.1381
159	455.84	159	151.065	159	22.6742		159.1	872.622	159.1	482.509	159.1	64.1314
159.1	455.776	159.1	151.033	159.1	22.6709		159.2	872.536	159.2	482.429	159.2	64.1185
159.2	455.71	159.2	151.007	159.2	22.6643		159.3	872.448	159.3	482.351	159.3	64.1045
159.3	455.648	159.3	150.98	159.3	22.6609		159.4	872.357	159.4	482.272	159.4	64.0962
159.4	455.583	159.4	150.956	159.4	22.6593		159.5	872.273	159.5	482.191	159.5	64.0888
159.5	455.518	159.5	150.925	159.5	22.658		159.6	872.183	159.6	482.108	159.6	64.0806
159.6	455.452	159.6	150.899	159.6	22.6537		159.7	872.097	159.7	482.033	159.7	64.0728
159.7	455.39	159.7	150.876	159.7	22.6536		159.8	872.007	159.8	481.95	159.8	64.0639
159.8	455.327	159.8	150.845	159.8	22.6501		159.9	871.918	159.9	481.868	159.9	64.0576
159.9	455.259	159.9	150.818	159.9	22.6522		160	871.83	160	481.783	160	64.0487
160	455.189	160	150.787	160	22.6501		160.1	871.745	160.1	481.707	160.1	64.038
160.1	455.122	160.1	150.762	160.1	22.6478		160.2	871.658	160.2	481.628	160.2	64.0288
160.2	455.056	160.2	150.732	160.2	22.6417		160.3	871.571	160.3	481.547	160.3	64.0195
160.3	454.994	160.3	150.704	160.3	22.6392		160.4	871.482	160.4	481.467	160.4	64.0163
160.4	454.929	160.4	150.672	160.4	22.6347		160.5	871.393	160.5	481.389	160.5	64.0145
160.5	454.865	160.5	150.646	160.5	22.6348		160.6	871.301	160.6	481.308	160.6	64.0078
160.6	454.804	160.6	150.616	160.6	22.6348		160.7	871.215	160.7	481.225	160.7	64.0063
160.7	454.742	160.7	150.589	160.7	22.6337		160.8	871.13	160.8	481.143	160.8	63.9985
160.8	454.674	160.8	150.558	160.8	22.6267		160.9	871.046	160.9	481.067	160.9	63.9899
160.9	454.613	160.9	150.531	160.9	22.6217		161	870.959	161	480.987	161	63.9821
161	454.552	161	150.504	161	22.6195		161.1	870.867	161.1	480.91	161.1	63.9769
161.1	454.491	161.1	150.477	161.1	22.6141		161.2	870.779	161.2	480.83	161.2	63.9686
161.2	454.43	161.2	150.448	161.2	22.6101		161.3	870.695	161.3	480.749	161.3	63.9617
161.3	454.367	161.3	150.419	161.3	22.6065		161.4	870.61	161.4	480.666	161.4	63.9519
161.4	454.306	161.4	150.392	161.4	22.601		161.5	870.528	161.5	480.585	161.5	63.9479
161.5	454.245	161.5	150.364	161.5	22.5977		161.6	870.441	161.6	480.505	161.6	63.9407
161.6	454.182	161.6	150.335	161.6	22.5917		161.7	870.355	161.7	480.426	161.7	63.9343
161.7	454.118	161.7	150.304	161.7	22.5879		161.8	870.271	161.8	480.346	161.8	63.9259
161.8	454.057	161.8	150.278	161.8	22.5858		161.9	870.186	161.9	480.264	161.9	63.9216
161.9	453.998	161.9	150.248	161.9	22.5828		162	870.101	162	480.18	162	63.914
162	453.937	162	150.219	162	22.5783		162.1	870.017	162.1	480.099	162.1	63.9111
162.1	453.875	162.1	150.19	162.1	22.5787		162.2	869.932	162.2	480.017	162.2	63.908
162.2	453.816	162.2	150.162	162.2	22.5791		162.3	869.842	162.3	479.934	162.3	63.9026
162.3	453.757	162.3	150.13	162.3	22.5741		162.4	869.753	162.4	479.855	162.4	63.895
162.4	453.694	162.4	150.108	162.4	22.5698		162.5	869.665	162.5	479.773	162.5	63.8904
162.5	453.629	162.5	150.081	162.5	22.5639		162.6	869.578	162.6	479.696	162.6	63.8854
162.6	453.562	162.6	150.052	162.6	22.5566		162.7	869.49	162.7	479.622	162.7	63.8805
162.7	453.494	162.7	150.023	162.7	22.5532		162.8	869.404	162.8	479.547	162.8	63.8733
162.8	453.427	162.8	149.995	162.8	22.55		162.9	869.318	162.9	479.474	162.9	63.8654
[truncated: 2,072 more rows]

## Sheet: 1322
Run 1; Ch 3; Cy 10; RefSub; MPY; conc=62.5_X	Run 1; Ch 3; Cy 10; RefSub; MPY; conc=62.5_Y	Run 1; Ch 3; Cy 11; RefSub; MPY; conc=125_X	Run 1; Ch 3; Cy 11; RefSub; MPY; conc=125_Y	Run 1; Ch 3; Cy 12; RefSub; MPY; conc=250_X	Run 1; Ch 3; Cy 12; RefSub; MPY; conc=250_Y	Run 1; Ch 3; Cy 13; RefSub; MPY; conc=500_X	Run 1; Ch 3; Cy 13; RefSub; MPY; conc=500_Y	Run 1; Ch 3; Cy 14; RefSub; MPY; conc=1000_X	Run 1; Ch 3; Cy 14; RefSub; MPY; conc=1000_Y
-36.9	0.0571	-36.8	0.131998	-36.8	0.192898	-36.7	0.1899	-36.8	0.309898
-36.8	0.0485	-36.7	0.1118	-36.7	0.1796	-36.6	0.2446	-36.7	0.1973
-36.7	0.03	-36.6	0.0907999	-36.6	0.1775	-36.5	0.2367	-36.6	0.1852
-36.6	0.0124	-36.5	0.0883	-36.5	0.1874	-36.4	0.1805	-36.5	0.2009
-36.5	0.0503	-36.4	0.0719	-36.4	0.176	-36.3	0.1524	-36.4	0.2086
-36.4	0.043	-36.3	0.0308004	-36.3	0.1663	-36.2	0.1685	-36.3	0.2049
-36.3	0.04	-36.2	0.0117	-36.2	0.1804	-36.1	0.1403	-36.2	0.2207
-36.2	0.0349	-36.1	0.0102003	-36.1	0.1692	-36	0.1665	-36.1	0.1933
-36.1	0.0469	-36	0.0209	-36	0.2087	-35.9	0.1732	-36	0.2269
-36	0.052	-35.9	-0.00479999	-35.9	0.211	-35.8	0.1559	-35.9	0.2361
-35.9	0.0545	-35.8	0.0116	-35.8	0.1884	-35.7	0.1232	-35.8	0.2105
-35.8	0.0567	-35.7	0.000599989	-35.7	0.1805	-35.6	0.1085	-35.7	0.1975
-35.7	0.0584	-35.6	-0.00529964	-35.6	0.1783	-35.5	0.1118	-35.6	0.2056
-35.6	0.067	-35.5	0.0412	-35.5	0.1841	-35.4	0.0694995	-35.5	0.2215
-35.5	0.0761	-35.4	0.0165	-35.4	0.1415	-35.3	0.0684	-35.4	0.179
-35.4	0.0617	-35.3	0.0152006	-35.3	0.142201	-35.2	0.0837	-35.3	0.190301
-35.3	0.0668	-35.2	0.0494	-35.2	0.1553	-35.1	0.0783	-35.2	0.2094
-35.2	0.0805	-35.1	0.0148009	-35.1	0.121301	-35	0.079	-35.1	0.200701
-35.1	0.0528	-35	0.00880001	-35	0.1326	-34.9	0.101399	-35	0.2146
-35	0.0463	-34.9	0.0421	-34.9	0.1504	-34.8	0.1014	-34.9	0.2268
-34.9	0.0404	-34.8	0.0361007	-34.8	0.139801	-34.7	0.1095	-34.8	0.200501
-34.8	0.0365	-34.7	0.0538	-34.7	0.1659	-34.6	0.1123	-34.7	0.2061
-34.7	0.0398	-34.6	0.0469002	-34.6	0.1668	-34.5	0.1243	-34.6	0.2082
-34.6	0.0244	-34.5	0.075	-34.5	0.1631	-34.4	0.111999	-34.5	0.2133
-34.5	0.0491	-34.4	0.0657	-34.4	0.1614	-34.3	0.1068	-34.4	0.1871
-34.4	0.0406	-34.3	0.0657005	-34.3	0.148401	-34.2	0.1087	-34.3	0.178201
-34.3	0.0306	-34.2	0.0761	-34.2	0.162	-34.1	0.1165	-34.2	0.1872
-34.2	0.0359	-34.1	0.0805002	-34.1	0.1547	-34	0.1217	-34.1	0.1744
-34.1	0.0304	-34	0.0978	-34	0.1467	-33.9	0.1257	-34	0.1832
-34	0.0392	-33.9	0.0917	-33.9	0.145	-33.8	0.1154	-33.9	0.1794
-33.9	0.0298	-33.8	0.0957003	-33.8	0.1264	-33.7	0.1193	-33.8	0.177
-33.8	0.0281	-33.7	0.0902	-33.7	0.1209	-33.6	0.1311	-33.7	0.1696
-33.7	0.0287	-33.6	0.0889001	-33.6	0.1207	-33.5	0.1251	-33.6	0.1704
-33.6	0.0255	-33.5	0.092	-33.5	0.1272	-33.4	0.136	-33.5	0.1707
-33.5	0.0311	-33.4	0.0846	-33.4	0.1186	-33.3	0.1439	-33.4	0.1801
-33.4	0.0303	-33.3	0.0844001	-33.3	0.1174	-33.2	0.141	-33.3	0.1891
-33.3	0.0409	-33.2	0.0691	-33.2	0.1085	-33.1	0.1384	-33.2	0.1925
-33.2	0.0268	-33.1	0.0737998	-33.1	0.1094	-33	0.1358	-33.1	0.2035
-33.1	0.0308	-33	0.0675	-33	0.1071	-32.9	0.1493	-33	0.1969
-33	0.0205	-32.9	0.0751	-32.9	0.1224	-32.8	0.158	-32.9	0.1933
-32.9	0.0162	-32.8	0.0815998	-32.8	0.1231	-32.7	0.1541	-32.8	0.1884
-32.8	0.0165	-32.7	0.0722	-32.7	0.124	-32.6	0.1513	-32.7	0.1807
-32.7	0.0118	-32.6	0.0659	-32.6	0.1264	-32.5	0.1484	-32.6	0.1752
-32.6	0.002	-32.5	0.0612	-32.5	0.1256	-32.4	0.1495	-32.5	0.1757
-32.5	-0.0059	-32.4	0.0606	-32.4	0.1233	-32.3	0.1511	-32.4	0.171
-32.4	-0.0079	-32.3	0.0637999	-32.3	0.1288	-32.2	0.1589	-32.3	0.1615
-32.3	-0.0051	-32.2	0.0676	-32.2	0.139	-32.1	0.1591	-32.2	0.1667
-32.2	0.0079	-32.1	0.0644001	-32.1	0.136	-32	0.162	-32.1	0.1672
-32.1	0.0128	-32	0.0633	-32	0.1368	-31.9	0.1689	-32	0.165
-32	0.0144	-31.9	0.0665	-31.9	0.1364	-31.8	0.1658	-31.9	0.172
-31.9	0.019	-31.8	0.0631001	-31.8	0.1312	-31.7	0.1634	-31.8	0.1739
-31.8	0.0121	-31.7	0.061	-31.7	0.1256	-31.6	0.1542	-31.7	0.1789
-31.7	0.0106	-31.6	0.0612	-31.6	0.1248	-31.5	0.1534	-31.6	0.1695
-31.6	0.0101	-31.5	0.0622	-31.5	0.1214	-31.4	0.1523	-31.5	0.168
-31.5	0.0124	-31.4	0.0595	-31.4	0.1167	-31.3	0.1485	-31.4	0.1629
-31.4	0.0147	-31.3	0.0554	-31.3	0.112	-31.2	0.1447	-31.3	0.1566
-31.3	0.0125	-31.2	0.054	-31.2	0.1105	-31.1	0.1414	-31.2	0.1581
-31.2	0.0084	-31.1	0.0456001	-31.1	0.1085	-31	0.1326	-31.1	0.1538
-31.1	0.0062	-31	0.0414	-31	0.1071	-30.9	0.1378	-31	0.1475
-31	0.0055	-30.9	0.0502999	-30.9	0.1144	-30.8	0.1341	-30.9	0.1521
-30.9	0.012	-30.8	0.0545999	-30.8	0.1182	-30.7	0.1382	-30.8	0.1563
-30.8	0.0114	-30.7	0.0594	-30.7	0.1241	-30.6	0.1306	-30.7	0.1663
-30.7	0.0171	-30.6	0.0549	-30.6	0.1243	-30.5	0.1257	-30.6	0.1689
-30.6	0.0175	-30.5	0.0568001	-30.5	0.1164	-30.4	0.1225	-30.5	0.1682
-30.5	0.015	-30.4	0.0555	-30.4	0.1153	-30.3	0.1271	-30.4	0.1672
-30.4	0.0149	-30.3	0.0587999	-30.3	0.1149	-30.2	0.1306	-30.3	0.1733
-30.3	0.0187	-30.2	0.0638	-30.2	0.1196	-30.1	0.1351	-30.2	0.1778
-30.2	0.0195	-30.1	0.0710999	-30.1	0.1251	-30	0.1359	-30.1	0.1777
-30.1	0.029	-30	0.0735	-30	0.1286	-29.9	0.1328	-30	0.1775
-30	0.031	-29.9	0.0745	-29.9	0.1285	-29.8	0.1372	-29.9	0.1777
-29.9	0.0294	-29.8	0.0798	-29.8	0.1299	-29.7	0.1376	-29.8	0.1805
-29.8	0.032	-29.7	0.0787	-29.7	0.1321	-29.6	0.1357	-29.7	0.1772
-29.7	0.0324	-29.6	0.0821	-29.6	0.1331	-29.5	0.1381	-29.6	0.1767
-29.6	0.0361	-29.5	0.0824	-29.5	0.1353	-29.4	0.1364	-29.5	0.1783
-29.5	0.0366	-29.4	0.0793	-29.4	0.1346	-29.3	0.1371	-29.4	0.1806
-29.4	0.0363	-29.3	0.0820999	-29.3	0.1339	-29.2	0.135	-29.3	0.1838
-29.3	0.04	-29.2	0.0854	-29.2	0.1292	-29.1	0.1342	-29.2	0.1831
-29.2	0.0415	-29.1	0.0867	-29.1	0.1257	-29	0.1379	-29.1	0.1836
-29.1	0.0424	-29	0.0948999	-29	0.1254	-28.9	0.1339	-29	0.1857
-29	0.0458	-28.9	0.0978	-28.9	0.1248	-28.8	0.134	-28.9	0.1865
-28.9	0.0484	-28.8	0.0952	-28.8	0.1235	-28.7	0.1372	-28.8	0.1863
-28.8	0.047	-28.7	0.0932	-28.7	0.1224	-28.6	0.1415	-28.7	0.1868
-28.7	0.0473	-28.6	0.0951	-28.6	0.1228	-28.5	0.1423	-28.6	0.1836
-28.6	0.0444	-28.5	0.0955	-28.5	0.1202	-28.4	0.1388	-28.5	0.1838
-28.5	0.0445	-28.4	0.0966	-28.4	0.1193	-28.3	0.1342	-28.4	0.1835
-28.4	0.0433	-28.3	0.0964	-28.3	0.118	-28.2	0.132	-28.3	0.1808
-28.3	0.0381	-28.2	0.0955	-28.2	0.1154	-28.1	0.1309	-28.2	0.1796
-28.2	0.035	-28.1	0.0924	-28.1	0.1149	-28	0.131	-28.1	0.1744
-28.1	0.0285	-28	0.0926	-28	0.1141	-27.9	0.1265	-28	0.1715
-28	0.0254	-27.9	0.0893	-27.9	0.1129	-27.8	0.1318	-27.9	0.1706
-27.9	0.0215	-27.8	0.0929999	-27.8	0.1194	-27.7	0.1314	-27.8	0.1764
-27.8	0.0264	-27.7	0.0909	-27.7	0.1168	-27.6	0.1265	-27.7	0.1766
-27.7	0.0231	-27.6	0.0915	-27.6	0.1113	-27.5	0.1201	-27.6	0.1756
-27.6	0.0194	-27.5	0.0890001	-27.5	0.1082	-27.4	0.1257	-27.5	0.1738
-27.5	0.0187	-27.4	0.0912999	-27.4	0.1111	-27.3	0.1249	-27.4	0.1772
-27.4	0.0229	-27.3	0.0909	-27.3	0.109	-27.2	0.1272	-27.3	0.1762
-27.3	0.0218	-27.2	0.0974	-27.2	0.1112	-27.1	0.1274	-27.2	0.1783
-27.2	0.0264	-27.1	0.0967	-27.1	0.1112	-27	0.1299	-27.1	0.1741
-27.1	0.0283	-27	0.0979	-27	0.1095	-26.9	0.1322	-27	0.1743
-27	0.029	-26.9	0.1002	-26.9	0.1089	-26.8	0.1309	-26.9	0.1754
-26.9	0.0302	-26.8	0.0982	-26.8	0.1093	-26.7	0.1303	-26.8	0.1722
-26.8	0.0305	-26.7	0.0991	-26.7	0.1105	-26.6	0.1306	-26.7	0.1744
-26.7	0.0296	-26.6	0.1026	-26.6	0.1133	-26.5	0.1317	-26.6	0.1732
-26.6	0.0332	-26.5	0.1022	-26.5	0.1126	-26.4	0.1277	-26.5	0.1743
-26.5	0.0382	-26.4	0.1016	-26.4	0.1107	-26.3	0.1243	-26.4	0.1753
-26.4	0.0358	-26.3	0.0957	-26.3	0.1106	-26.2	0.1234	-26.3	0.1763
-26.3	0.0362	-26.2	0.0897	-26.2	0.1054	-26.1	0.1242	-26.2	0.1718
-26.2	0.0342	-26.1	0.0902	-26.1	0.1022	-26	0.1243	-26.1	0.1738
-26.1	0.0347	-26	0.0854	-26	0.0983	-25.9	0.1215	-26	0.1766
-26	0.0334	-25.9	0.0831	-25.9	0.0969	-25.8	0.1162	-25.9	0.1756
-25.9	0.0306	-25.8	0.0786001	-25.8	0.0970001	-25.7	0.114	-25.8	0.1758
-25.8	0.0237	-25.7	0.0772	-25.7	0.0936	-25.6	0.1105	-25.7	0.1746
-25.7	0.0222	-25.6	0.0752001	-25.6	0.0923001	-25.5	0.104	-25.6	0.1674
-25.6	0.0223	-25.5	0.0702001	-25.5	0.0836001	-25.4	0.0986	-25.5	0.1602
-25.5	0.0193	-25.4	0.0644001	-25.4	0.0770001	-25.3	0.0945	-25.4	0.1536
-25.4	0.0166	-25.3	0.0631	-25.3	0.0727	-25.2	0.0916	-25.3	0.1533
-25.3	0.0147	-25.2	0.0647	-25.2	0.0693	-25.1	0.0869	-25.2	0.1521
-25.2	0.0081	-25.1	0.0652	-25.1	0.0693	-25	0.085	-25.1	0.147
-25.1	0.0037	-25	0.0678	-25	0.0664	-24.9	0.0823	-25	0.1405
-25	-0.000500005	-24.9	0.0654	-24.9	0.0613	-24.8	0.0878	-24.9	0.1347
-24.9	-0.00179999	-24.8	0.067	-24.8	0.063	-24.7	0.0864	-24.8	0.137
-24.8	0.0011	-24.7	0.0705	-24.7	0.064	-24.6	0.0848999	-24.7	0.1386
-24.7	0.000899998	-24.6	0.0691	-24.6	0.0651	-24.5	0.0799	-24.6	0.1358
-24.6	-0.000599997	-24.5	0.0643001	-24.5	0.0623001	-24.4	0.0796	-24.5	0.1321
-24.5	-0.0066	-24.4	0.0646	-24.4	0.0616	-24.3	0.0798	-24.4	0.1293
-24.4	-0.0067	-24.3	0.062	-24.3	0.0581	-24.2	0.0809	-24.3	0.1266
-24.3	-0.008	-24.2	0.0608	-24.2	0.054	-24.1	0.0828999	-24.2	0.124
-24.2	-0.00740001	-24.1	0.0586	-24.1	0.0495	-24	0.0784	-24.1	0.1245
-24.1	-0.0059	-24	0.0578001	-24	0.0462001	-23.9	0.072	-24	0.1227
-24	-0.0049	-23.9	0.0516001	-23.9	0.0443001	-23.8	0.0728	-23.9	0.1211
-23.9	-0.0096	-23.8	0.0484	-23.8	0.045	-23.7	0.0771	-23.8	0.1224
-23.8	-0.0072	-23.7	0.0509	-23.7	0.0469	-23.6	0.0782	-23.7	0.1214
-23.7	-0.00760001	-23.6	0.0493	-23.6	0.0454	-23.5	0.0786	-23.6	0.1212
-23.6	-0.00539999	-23.5	0.0479	-23.5	0.0445	-23.4	0.0747	-23.5	0.1209
-23.5	-0.0064	-23.4	0.0487	-23.4	0.045	-23.3	0.0753	-23.4	0.1166
-23.4	-0.0028	-23.3	0.051	-23.3	0.0476	-23.2	0.079	-23.3	0.1158
-23.3	5.98448e-09	-23.2	0.049	-23.2	0.0488	-23.1	0.0796	-23.2	0.1162
-23.2	0.0021	-23.1	0.0495	-23.1	0.0541	-23	0.0766	-23.1	0.1144
-23.1	0.0033	-23	0.0458	-23	0.0568	-22.9	0.0746	-23	0.1092
-23	0.00230001	-22.9	0.0388	-22.9	0.0545	-22.8	0.0675	-22.9	0.1041
-22.9	0.0042	-22.8	0.0316001	-22.8	0.0498001	-22.7	0.0642	-22.8	0.1005
-22.8	-0.000800006	-22.7	0.0307	-22.7	0.051	-22.6	0.0651	-22.7	0.1054
-22.7	0.000499999	-22.6	0.0309	-22.6	0.0557	-22.5	0.07	-22.6	0.1067
-22.6	0.000400002	-22.5	0.0302	-22.5	0.0593	-22.4	0.0753	-22.5	0.1064
-22.5	0.000800005	-22.4	0.0343	-22.4	0.0598	-22.3	0.0771	-22.4	0.1045
-22.4	0.00539999	-22.3	0.0375999	-22.3	0.0640999	-22.2	0.0741	-22.3	0.111
-22.3	0.0126	-22.2	0.0351	-22.2	0.0631	-22.1	0.0716	-22.2	0.1087
-22.2	0.0155	-22.1	0.0384	-22.1	0.0624	-22	0.0716	-22.1	0.1084
-22.1	0.0121	-22	0.0363	-22	0.0612	-21.9	0.0727	-22	0.1037
-22	0.0128	-21.9	0.0353	-21.9	0.0588	-21.8	0.0645	-21.9	0.1023
-21.9	0.00659999	-21.8	0.0252001	-21.8	0.0532001	-21.7	0.0490998	-21.8	0.0944001
-21.8	-0.0078	-21.7	0.0115	-21.7	0.0329	-21.6	0.0355998	-21.7	0.0865
-21.7	-0.0222	-21.6	-0.00899976	-21.6	0.0209002	-21.5	0.0302	-21.6	0.0793002
-21.6	-0.0318	-21.5	-0.0260998	-21.5	0.00820024	-21.4	0.0258	-21.5	0.0701002
-21.5	-0.0439	-21.4	-0.0297999	-21.4	0.0037001	-21.3	0.0285	-21.4	0.0654001
-21.4	-0.0484	-21.3	-0.029	-21.3	0.0073	-21.2	0.0326	-21.3	0.0653
-21.3	-0.0446	-21.2	-0.0262	-21.2	0.0084	-21.1	0.0362	-21.2	0.0624
-21.2	-0.0406	-21.1	-0.0225	-21.1	0.0118	-21	0.0407	-21.1	0.0642
-21.1	-0.0357	-21	-0.018	-21	0.0119	-20.9	0.0427	-21	0.0623
-21	-0.0354	-20.9	-0.0209999	-20.9	0.00890005	-20.8	0.0361	-20.9	0.0611001
-20.9	-0.0373	-20.8	-0.0242999	-20.8	0.00570009	-20.7	0.0266	-20.8	0.0566001
-20.8	-0.0433	-20.7	-0.0257	-20.7	0.00139999	-20.6	0.0287	-20.7	0.0482
-20.7	-0.0473	-20.6	-0.0252	-20.6	0.0042	-20.5	0.031	-20.6	0.0526
-20.6	-0.0437	-20.5	-0.0209	-20.5	0.0109	-20.4	0.0299	-20.5	0.0575
-20.5	-0.0396	-20.4	-0.0222	-20.4	0.0111	-20.3	0.0301	-20.4	0.0601
-20.4	-0.0385	-20.3	-0.0266	-20.3	0.00710004	-20.2	0.0319	-20.3	0.0612
-20.3	-0.0361	-20.2	-0.0206	-20.2	0.0102	-20.1	0.0328001	-20.2	0.0662
-20.2	-0.0325	-20.1	-0.0126	-20.1	0.00890001	-20	0.0438	-20.1	0.0672
-20.1	-0.0294	-20	-0.00650012	-20	0.0139999	-19.9	0.0549	-20	0.0724999
-20	-0.0181	-19.9	-0.00420005	-19.9	0.0213999	-19.8	0.0518	-19.9	0.0742999
-19.9	-0.00899999	-19.8	-0.00619991	-19.8	0.0202001	-19.7	0.0601	-19.8	0.0748001
-19.8	-0.0107	-19.7	-0.000700007	-19.7	0.0235	-19.6	0.0621999	-19.7	0.0849
-19.7	-0.00290001	-19.6	0.000799974	-19.6	0.0331	-19.5	0.056	-19.6	0.0868
-19.6	0.0025	-19.5	9.16734e-08	-19.5	0.0383001	-19.4	0.0594	-19.5	0.0809001
-19.5	0.003	-19.4	0.000700033	-19.4	0.0365	-19.3	0.0584	-19.4	0.0802
-19.4	0.01	-19.3	0.0039	-19.3	0.0392	-19.2	0.0548998	-19.3	0.0854
-19.3	0.0166	-19.2	0.0079	-19.2	0.0425	-19.1	0.0470999	-19.2	0.0882
-19.2	0.0165	-19.1	0.000800184	-19.1	0.0455002	-19	0.0357	-19.1	0.0893002
-19.1	0.0124	-19	0.00120015	-19	0.0467001	-18.9	0.0337	-19	0.0826001
-19	0.006	-18.9	-0.00139993	-18.9	0.0483001	-18.8	0.0333	-18.9	0.0791001
-18.9	0.0076	-18.8	-0.00199989	-18.8	0.0434001	-18.7	0.0416001	-18.8	0.0770001
-18.8	-0.0018	-18.7	0.0041	-18.7	0.0461	-18.6	0.0499	-18.7	0.0813
-18.7	0.0059	-18.6	0.00609994	-18.6	0.0448999	-18.5	0.0476	-18.6	0.0860999
-18.6	0.008	-18.5	0.00280001	-18.5	0.0463	-18.4	0.0494	-18.5	0.0824
-18.5	0.0044	-18.4	0.00469997	-18.4	0.0442	-18.3	0.058	-18.4	0.0829
-18.4	0.0036	-18.3	0.0128	-18.3	0.0524	-18.2	0.0563999	-18.3	0.0917
-18.3	0.0073	-18.2	0.0164	-18.2	0.0507	-18.1	0.0567999	-18.2	0.0921
-18.2	0.0044	-18.1	0.0214001	-18.1	0.0467001	-18	0.0516	-18.1	0.0907001
-18.1	0.0039	-18	0.0269001	-18	0.0420001	-17.9	0.0465	-18	0.0873001
-18	0.0038	-17.9	0.0285002	-17.9	0.0353002	-17.8	0.0576	-17.9	0.0832002
-17.9	0.0014	-17.8	0.0420999	-17.8	0.0437999	-17.7	0.0644	-17.8	0.0878999
-17.8	0.0088	-17.7	0.054	-17.7	0.0491	-17.6	0.0659	-17.7	0.0944
-17.7	0.0152	-17.6	0.0565	-17.6	0.0442	-17.5	0.0649	-17.6	0.091
-17.6	0.0093	-17.5	0.0466	-17.5	0.037	-17.4	0.0648	-17.5	0.0855
-17.5	0.0013	-17.4	0.0487	-17.4	0.0343	-17.3	0.0613	-17.4	0.0762
-17.4	-0.0049	-17.3	0.0515999	-17.3	0.0406999	-17.2	0.0498999	-17.3	0.0821999
-17.3	-0.000500002	-17.2	0.0398	-17.2	0.0299	-17.1	0.0449998	-17.2	0.0685
-17.2	-0.0132	-17.1	0.0415001	-17.1	0.0262001	-17	0.0383	-17.1	0.0709001
-17.1	-0.0163	-17	0.0371002	-17	0.0241002	-16.9	0.0281	-17	0.0623002
-17	-0.022	-16.9	0.0384001	-16.9	0.0228001	-16.8	0.0261	-16.9	0.0647001
-16.9	-0.023	-16.8	0.0355001	-16.8	0.0265001	-16.7	0.0244999	-16.8	0.0668001
-16.8	-0.027	-16.7	0.0394	-16.7	0.0249	-16.6	0.0164999	-16.7	0.0606
-16.7	-0.0302	-16.6	0.0374001	-16.6	0.0225001	-16.5	0.0146	-16.6	0.0542001
-16.6	-0.0326	-16.5	0.0418001	-16.5	0.0209001	-16.4	0.0174	-16.5	0.0469001
-16.5	-0.0323	-16.4	0.0496	-16.4	0.0262	-16.3	0.0139	-16.4	0.0413
-16.4	-0.0293	-16.3	0.0552999	-16.3	0.0276999	-16.2	0.0210001	-16.3	0.0353999
-16.3	-0.0246	-16.2	0.0625	-16.2	0.0253	-16.1	0.0271	-16.2	0.0353
-16.2	-0.0215	-16.1	0.0676999	-16.1	0.0196999	-16	0.0267	-16.1	0.0315999
-16.1	-0.0184	-16	0.0641	-16	0.0137	-15.9	0.0251	-16	0.0266
-16	-0.0176	-15.9	0.0565	-15.9	0.00769997	-15.8	0.0266	-15.9	0.0163
-15.9	-0.0142	-15.8	0.047	-15.8	2.55386e-09	-15.7	0.0257999	-15.8	0.0098
-15.8	-0.0155	-15.7	0.0433	-15.7	-0.0044	-15.6	0.0225999	-15.7	0.0058
-15.7	-0.0163	-15.6	0.0353001	-15.6	-0.0133999	-15.5	0.0201	-15.6	-0.00239993
-15.6	-0.0178	-15.5	0.0269001	-15.5	-0.0185999	-15.4	0.0185	-15.5	-0.00969993
-15.5	-0.0164	-15.4	0.0241	-15.4	-0.0183	-15.3	0.0176	-15.4	-0.0122
-15.4	-0.0159	-15.3	0.0211	-15.3	-0.0218	-15.2	0.0184	-15.3	-0.0112
-15.3	-0.0152	-15.2	0.0208	-15.2	-0.0273	-15.1	0.0146001	-15.2	-0.0138
-15.2	-0.0221	-15.1	0.0185	-15.1	-0.0277	-15	0.0169	-15.1	-0.015
-15.1	-0.0363	-15	0.0285999	-15	-0.0073001	-14.9	0.017	-15	-0.0135001
-15	-0.0341	-14.9	0.0159999	-14.9	-0.00750005	-14.8	0.0063	-14.9	-0.00950005
-14.9	-0.0469	-14.8	0.0103999	-14.8	0.00289992	-14.7	0.00129994	-14.8	-0.000600083
-14.8	-0.0524	-14.7	0.0269	-14.7	0.0182	-14.6	0.00269976	-14.7	0.0172
-14.7	-0.0474	-14.6	0.0387001	-14.6	0.0147001	-14.5	-0.0077	-14.6	0.0230001
-14.6	-0.0416	-14.5	0.0247002	-14.5	0.0118002	-14.4	-0.0263	-14.5	0.0210002
-14.5	-0.042	-14.4	0.0132002	-14.4	0.00670023	-14.3	-0.0351	-14.4	-0.000799765
-14.4	-0.0424	-14.3	0.00930016	-14.3	-0.00479984	-14.2	-0.0446	-14.3	0.00310016
-14.3	-0.0405	-14.2	0.0135	-14.2	-0.0049	-14.1	-0.0410001	-14.2	-0.0052
-14.2	-0.0375	-14.1	0.0203	-14.1	-0.00810003	-14	-0.0433	-14.1	-0.000200028
-14.1	-0.0257	-14	0.0230001	-14	-0.00679995	-13.9	-0.0372	-14	-0.00109995
-14	-0.0241	-13.9	0.0245	-13.9	-0.00670001	-13.8	-0.031	-13.9	-0.00060001
-13.9	-0.0216	-13.8	0.0258999	-13.8	0.000899895	-13.7	-0.0267999	-13.8	0.00639989
-13.8	-0.0149	-13.7	0.0271	-13.7	0.0107	-13.6	-0.0217998	-13.7	0.0165
-13.7	-0.0087	-13.6	0.0304999	-13.6	0.0144999	-13.5	-0.0178	-13.6	0.0217999
-13.6	-0.0075	-13.5	0.0442998	-13.5	0.0200998	-13.4	-0.0196	-13.5	0.0296998
-13.5	-0.0021	-13.4	0.0415	-13.4	0.014	-13.3	-0.0245	-13.4	0.0256
-13.4	-0.0072	-13.3	0.0268001	-13.3	0.00320009	-13.2	-0.0321002	-13.3	0.0143001
-13.3	-0.0164	-13.2	0.0248	-13.2	-0.0012	-13.1	-0.0409002	-13.2	0.0059
-13.2	-0.0181	-13.1	0.0197002	-13.1	-0.00679982	-13	-0.0417	-13.1	-0.00249982
-13.1	-0.0303	-13	0.0125002	-13	-0.0156998	-12.9	-0.038	-13	-0.0120998
-13	-0.0349	-12.9	0.00770011	-12.9	-0.0215999	-12.8	-0.0378	-12.9	-0.0177999
-12.9	-0.0338	-12.8	0.00470005	-12.8	-0.0200999	-12.7	-0.0322999	-12.8	-0.0189999
-12.8	-0.0282	-12.7	0.0145	-12.7	-0.0143	-12.6	-0.0205999	-12.7	-0.0118
-12.7	-0.0144	-12.6	0.0281999	-12.6	-0.00690014	-12.5	-0.0121	-12.6	-0.00460014
-12.6	-0.0034	-12.5	0.0308999	-12.5	0.0015999	-12.4	-0.0102	-12.5	0.000899905
-12.5	0.0021	-12.4	0.0269	-12.4	0.0018	-12.3	-0.0055	-12.4	0.0011
-12.4	0.0039	-12.3	0.0242999	-12.3	0.00729992	-12.2	-0.00379998	-12.3	0.00249992
-12.3	0.0036	-12.2	0.0197	-12.2	0.0075	-12.1	-0.00370003	-12.2	0.0082
-12.2	0.0021	-12.1	0.0175	-12.1	0.00959998	-12	-0.0073	-12.1	0.00639998
-12.1	-0.0016	-12	0.0142	-12	0.00680003	-11.9	-0.0045	-12	0.00530003
-12	-0.000200003	-11.9	0.00749994	-11.9	0.0107999	-11.8	-0.0018	-11.9	0.00669994
-11.9	0.0044	-11.8	0.0070999	-11.8	0.0166999	-11.7	0.00320005	-11.8	0.0052999
-11.8	0.0121	-11.7	0.0025	-11.7	0.0215	-11.6	0.00399996	-11.7	0.0055
-11.7	0.0164	-11.6	-0.00160004	-11.6	0.0224	-11.5	0.0039	-11.6	0.00409996
-11.6	0.018	-11.5	-0.00449996	-11.5	0.0196	-11.4	-0.0016	-11.5	-0.000599958
-11.5	0.0165	-11.4	-0.0134999	-11.4	0.0129001	-11.3	-0.0043	-11.4	-0.00129988
-11.4	0.0104	-11.3	-0.0225999	-11.3	0.00830012	-11.2	-0.00359994	-11.3	-0.00409988
-11.3	0.003	-11.2	-0.0181	-11.2	0.0108	-11.1	0.00249996	-11.2	-0.0061
-11.2	0.0024	-11.1	-0.0124001	-11.1	0.0159999	-11	0.0041	-11.1	-0.00100006
-11.1	0.0089	-11	-0.0101	-11	0.0138	-10.9	0.0041	-11	0.000500037
-11	0.008	-10.9	-0.0101999	-10.9	0.0103001	-10.8	0.0025	-10.9	0.00400007
-10.9	0.0054	-10.8	-0.0104999	-10.8	0.00860008	-10.7	0.000199934	-10.8	0.00300008
-10.8	0.0047	-10.7	-0.0107	-10.7	0.0118	-10.6	0.00129992	-10.7	0.0039
-10.7	0.0046	-10.6	-0.00659993	-10.6	0.00950007	-10.5	0.0018	-10.6	6.64222e-08
-10.6	0.0048	-10.5	-0.00669992	-10.5	0.00610008	-10.4	0.0046	-10.5	-0.00419992
-10.5	0.000600001	-10.4	-0.00590002	-10.4	0.00879998	-10.3	0.0033	-10.4	-0.00270002
-10.4	0.0038	-10.3	-0.00629996	-10.3	0.00700004	-10.2	0.00280003	-10.3	-0.00759996
-10.3	0.0038	-10.2	-0.0067	-10.2	0.0067	-10.1	0.00719997	-10.2	-0.0079
-10.2	0.0041	-10.1	-0.00680003	-10.1	0.00469997	-10	0.0063	-10.1	-0.00850003
-10.1	0.0072	-10	-0.0111	-10	0.00310003	-9.9	0.0052	-10	-0.00989997
-10	0.0092	-9.9	-0.012	-9.9	0.00550004	-9.8	0.0076	-9.9	-0.00889996
-9.9	0.0121	-9.8	-0.0136	-9.8	0.00130002	-9.7	0.00249993	-9.8	-0.00859998
-9.8	0.0098	-9.7	-0.0208	-9.7	-0.0023	-9.6	-0.00269998	-9.7	-0.0117
-9.7	0.0096	-9.6	-0.0251999	-9.6	-0.00599993	-9.5	-0.0038	-9.6	-0.0164999
-9.6	0.009	-9.5	-0.0226	-9.5	-0.00380002	-9.4	-0.0085	-9.5	-0.0167
-9.5	0.0108	-9.4	-0.0238	-9.4	-0.00219999	-9.3	-0.0048	-9.4	-0.0127
-9.4	0.0141	-9.3	-0.0196001	-9.3	0.00129994	-9.2	-0.00199999	-9.3	-0.00800006
-9.3	0.0221	-9.2	-0.0176	-9.2	0.0053	-9.1	-0.000199972	-9.2	-0.0077
-9.2	0.0259	-9.1	-0.0167	-9.1	0.0065	-9	0.000799999	-9.1	-0.0082
-9.1	0.0281	-9	-0.0157	-9	0.00519997	-8.9	-0.0025	-9	-0.00790003
-9	0.031	-8.9	-0.0199	-8.9	0.00390005	-8.8	-0.0059	-8.9	-0.0131
-8.9	0.025	-8.8	-0.0274999	-8.8	0.00250006	-8.7	-0.00539996	-8.8	-0.0151999
-8.8	0.0225	-8.7	-0.0287	-8.7	0.0052	-8.6	-0.00160004	-8.7	-0.0227
-8.7	0.021	-8.6	-0.027	-8.6	0.0106	-8.5	-0.0063	-8.6	-0.0229
-8.6	0.0208	-8.5	-0.031	-8.5	0.00860004	-8.4	-0.0106	-8.5	-0.0272
-8.5	0.0192	-8.4	-0.0338	-8.4	0.00550004	-8.3	-0.0115	-8.4	-0.0316
-8.4	0.018	-8.3	-0.036	-8.3	0.00210003	-8.2	-0.0184001	-8.3	-0.0349
-8.3	0.0162	-8.2	-0.038	-8.2	-0.0048	-8.1	-0.0169999	-8.2	-0.0369
-8.2	0.0061	-8.1	-0.0361999	-8.1	-0.00309987	-8	-0.0049	-8.1	-0.0375999
-8.1	0.0004	-8	-0.0258001	-8	-0.00130012	-7.9	-0.0055	-8	-0.0265001
-8	0.0073	-7.9	-0.0175	-7.9	-0.00309995	-7.8	-0.0159	-7.9	-0.0193
-7.9	0.0114	-7.8	-0.0186999	-7.8	-0.00479987	-7.7	-0.0215	-7.8	-0.0187999
-7.8	0.0107	-7.7	-0.0205	-7.7	-0.0054	-7.6	-0.0148	-7.7	-0.0188
-7.7	0.0082	-7.6	-0.0207	-7.6	-0.00519999	-7.5	-0.0112	-7.6	-0.0197
-7.6	0.0082	-7.5	-0.0218	-7.5	-0.00589999	-7.4	-0.0119	-7.5	-0.0177
-7.5	0.004	-7.4	-0.0212999	-7.4	-0.00849995	-7.3	-0.0141	-7.4	-0.0195999
-7.4	0.0055	-7.3	-0.0256999	-7.3	-0.00889994	-7.2	-0.00819997	-7.3	-0.0175999
-7.3	0.0023	-7.2	-0.02	-7.2	-0.0042	-7.1	-0.00879998	-7.2	-0.0115
-7.2	0.0032	-7.1	-0.0168	-7.1	-0.00280003	-7	-0.0071	-7.1	-0.00950003
-7.1	0.0041	-7	-0.0132	-7	-0.00260002	-6.9	-0.0037	-7	-0.00920002
-7	0.0083	-6.9	-0.00980002	-6.9	-2.12458e-08	-6.8	-0.0069	-6.9	-0.00930002
-6.9	0.0065	-6.8	-0.00879996	-6.8	-0.00349996	-6.7	-0.00620007	-6.8	-0.0115
-6.8	0.0019	-6.7	-0.0075	-6.7	-0.0024	-6.6	-0.0117	-6.7	-0.0106
-6.7	0.0028	-6.6	-0.00959993	-6.6	-0.00269993	-6.5	-0.0089	-6.6	-0.00899993
-6.6	-0.0034	-6.5	-0.00770002	-6.5	-0.000600015	-6.4	-0.0058	-6.5	-0.00650002
-6.5	-0.003	-6.4	-0.00849999	-6.4	-0.00279999	-6.3	-0.0055	-6.4	-0.00899999
-6.4	-0.0042	-6.3	-0.00899998	-6.3	-0.00629998	-6.2	-0.0115	-6.3	-0.00869998
-6.3	-0.0014	-6.2	-0.0115	-6.2	-0.0091	-6.1	-0.0136	-6.2	-0.0082
-6.2	-0.0053	-6.1	-0.00919997	-6.1	-0.00909997	-6	-0.0131	-6.1	-0.00819997
-6.1	-0.0064	-6	-0.00899998	-6	-0.00849998	-5.9	-0.0112	-6	-0.00709998
-6	-0.0089	-5.9	-0.00700002	-5.9	-0.00600002	-5.8	-0.0106	-5.9	-0.00610002
-5.9	-0.0053	-5.8	-0.0054	-5.8	-0.0035	-5.7	-0.0115	-5.8	-0.004
-5.8	-0.004	-5.7	-0.0075	-5.7	-0.0032	-5.6	-0.0114	-5.7	-0.0036
-5.7	-0.0034	-5.6	-0.00879997	-5.6	-0.00209997	-5.5	-0.0097	-5.6	-0.00479997
-5.6	-0.0029	-5.5	-0.0103	-5.5	-0.00259998	-5.4	-0.0092	-5.5	-0.00439998
-5.5	-0.0026	-5.4	-0.00780001	-5.4	-0.00300001	-5.3	-0.0068	-5.4	-0.00340001
-5.4	-0.0031	-5.3	-0.00329998	-5.3	-0.00249998	-5.2	-0.00760002	-5.3	-0.00169998
-5.3	-0.0035	-5.2	-0.0058	-5.2	-0.0066	-5.1	-0.00640001	-5.2	-0.0016
-5.2	-0.0052	-5.1	-0.00609998	-5.1	-0.00799998	-5	-0.0051	-5.1	-0.000899977
-5.1	-0.0047	-5	-0.00499999	-5	-0.00509999	-4.9	-0.00299997	-5	-0.000699992
-5	-0.0035	-4.9	-0.0051	-4.9	-9.99999e-05	-4.8	-0.0014	-4.9	-0.0031
-4.9	-0.0023	-4.8	-0.00240006	-4.8	0.00219994	-4.7	0.0031	-4.8	0.000199943
-4.8	-0.0002	-4.7	0.004	-4.7	0.0055	-4.6	0.0046	-4.7	0.0041
-4.7	0.0049	-4.6	0.00289996	-4.6	0.00599996	-4.5	0.008	-4.6	0.00829996
-4.6	0.008	-4.5	0.0041	-4.5	0.0111	-4.4	0.00859989	-4.5	0.0133
-4.5	0.0102	-4.4	0.0035	-4.4	0.0105	-4.3	0.0051	-4.4	0.0146
-4.4	0.0118	-4.3	0.000500107	-4.3	0.0108001	-4.2	0.0056	-4.3	0.0131001
-4.3	0.0081	-4.2	-9.99999e-05	-4.2	0.0107	-4.1	0.0015	-4.2	0.0094
-4.2	0.0019	-4.1	-0.00339981	-4.1	0.00680019	-4	0.0045	-4.1	0.00550019
-4.1	-0.0013	-4	0.0017	-4	0.0104	-3.9	0.00810002	-4	0.0093
-4	0.0041	-3.9	0.0019	-3.9	0.0115	-3.8	0.0095	-3.9	0.0111
-3.9	0.003	-3.8	0.00369998	-3.8	0.0163	-3.7	0.0107	-3.8	0.0138
-3.8	0.0013	-3.7	0.0038	-3.7	0.0178	-3.6	0.0132	-3.7	0.0164
-3.7	0.0033	-3.6	0.00580008	-3.6	0.0215001	-3.5	0.0107	-3.6	0.0113001
-3.6	0.0041	-3.5	0.0058	-3.5	0.0203	-3.4	0.00660002	-3.5	0.0022
-3.5	-0.0029	-3.4	0.0032	-3.4	0.0204	-3.3	0.008	-3.4	-0.0031
-3.4	-0.0091	-3.3	0.00189998	-3.3	0.0185	-3.2	0.0074	-3.3	-0.000500022
-3.3	-0.0149	-3.2	0.0026	-3.2	0.0154	-3.1	0.0061	-3.2	-0.0021
-3.2	-0.0086	-3.1	-0.000199901	-3.1	0.0072001	-3	0.0082	-3.1	-0.0093999
-3.1	-0.0058	-3	0.0081	-3	0.0197	-2.9	0.00559998	-3	-0.0108
-3	-0.0025	-2.9	0.005	-2.9	0.0178	-2.8	0.009	-2.9	-0.0147
-2.9	-0.0019	-2.8	0.00390002	-2.8	0.0154	-2.7	0.0107	-2.8	-0.0149
-2.8	-0.0053	-2.7	0.0025	-2.7	0.0145	-2.6	0.0159	-2.7	-0.0186
-2.7	-0.0055	-2.6	0.00469994	-2.6	0.0163999	-2.5	0.0151	-2.6	-0.0151001
-2.6	9.99996e-05	-2.5	0.0068	-2.5	0.0165	-2.4	0.0166001	-2.5	-0.0163
-2.5	-0.0048	-2.4	0.0083	-2.4	0.0171	-2.3	0.0211	-2.4	-0.0143
-2.4	0.004	-2.3	0.0127999	-2.3	0.0239999	-2.2	0.0162	-2.3	-0.00850008
-2.3	0.0126	-2.2	0.0122	-2.2	0.0227	-2.1	0.0224	-2.2	-0.0149
-2.2	0.0167	-2.1	0.0189998	-2.1	0.0345998	-2	0.0232	-2.1	-0.0149002
-2.1	0.0265	-2	0.0167	-2	0.0348	-1.9	0.0204	-2	-0.0127
-2	0.0341	-1.9	0.0148	-1.9	0.0299	-1.8	0.0213	-1.9	-0.0133
-1.9	0.0279	-1.8	0.014	-1.8	0.0318	-1.7	0.023	-1.8	-0.018
-1.8	0.0326	-1.7	0.0143	-1.7	0.0415	-1.6	0.021	-1.7	-0.0157
-1.7	0.0311	-1.6	0.0169	-1.6	0.0471	-1.5	0.0332	-1.6	-0.0217
-1.6	0.0332	-1.5	0.0186	-1.5	0.054	-1.4	0.0308	-1.5	-0.0116
-1.5	0.0402	-1.4	0.0186	-1.4	0.054	-1.3	0.0308	-1.4	-0.0176
-1.4	0.0406	-1.3	0.0178	-1.3	0.0557	-1.2	0.0298	-1.3	-0.014
-1.3	0.0417	-1.2	0.0178	-1.2	0.0634	-1.1	0.0275	-1.2	-0.0116
-1.2	0.0406	-1.1	0.0159001	-1.1	0.068	-1	0.0244	-1.1	0.0222001
-1.1	0.0406	-1	0.0118	-1	0.0691001	-0.899998	0.0231	-1	0.0454
-1	0.0417	-0.900002	0.0118	-0.900002	0.0741	-0.799999	0.0231	-0.900002	0.0567
-0.900002	0.0424	-0.800003	0.0116998	-0.800003	0.0803998	-0.700001	0.0231	-0.800003	0.1079
-0.799999	0.0431	-0.700001	0.0118	-0.700001	0.0898002	-0.599998	0.0231	-0.700001	0.1347
-0.700001	0.0567	-0.600002	0.0118	-0.600002	0.0935	-0.5	0.0244	-0.600002	0.1433
-0.599998	0.0567	-0.5	0.0159001	-0.5	0.122	-0.399998	0.0275	-0.5	0.145
-0.5	0.0587	-0.400002	0.0178	-0.400002	0.123	-0.299999	0.0298	-0.400002	0.1529
-0.400002	0.0699	-0.300003	0.0178	-0.300003	0.1245	-0.200001	0.0308	-0.300003	0.1545
-0.299999	0.0781	-0.200001	0.0186	-0.200001	0.1253	-0.0999985	0.0308	-0.200001	0.1887
-0.200001	0.08	-0.100002	0.0193	-0.100002	0.1414	0	0.0332	-0.100002	0.2231
-0.0999985	0.1167	0	0.7491	0	0.587	0.100002	0.510576	0	0.8932
0	0.4761	0.0999985	1.189	0.0999985	1.1875	0.200001	1.1595	0.0999985	2.6237
0.0999985	1.2016	0.199997	2.20782	0.199997	2.11422	0.299999	4.8315	0.199997	4.09012
0.200001	1.9934	0.299999	5.6356	0.299999	6.2232	0.400002	9.598	0.299999	10.2651
0.299999	4.6373	0.399998	7.3882	0.399998	8.4897	0.5	12.8061	0.399998	15.5953
0.400002	6.0456	0.5	8.4903	0.5	10.4915	0.600002	16.0531	0.5	21.6834
0.5	6.7914	0.599998	9.1382	0.599998	11.96	0.700001	19.5734	0.599998	28.9679
0.599998	6.8787	0.699997	9.8445	0.699997	13.5973	0.799999	23.4994	0.699997	37.9658
0.700001	6.943	0.799999	10.603	0.799999	15.117	0.900002	27.9463	0.799999	47.561
0.799999	7.0741	0.899998	11.4729	0.899998	17.1694	1	32.7214	0.899998	58.1524
0.900002	7.4327	1	12.4084	1	19.1176	1.1	37.2568	1	69.2215
1	7.7092	1.1	13.0468	1.1	20.8674	1.2	41.7568	1.1	80.0327
1.1	7.751	1.2	13.7513	1.2	22.7166	1.3	46.1753	1.2	90.6445
1.2	7.7546	1.3	14.6164	1.3	24.3918	1.4	50.8017	1.3	101.083
1.3	8.0667	1.4	15.2194	1.4	26.2597	1.5	55.6746	1.4	111.281
1.4	8.0781	1.5	16.7142	1.5	28.7513	1.6	60.5153	1.5	121.935
1.5	8.854	1.6	18.1482	1.6	31.1876	1.7	65.3918	1.6	131.757
1.6	9.6807	1.7	19.5266	1.7	33.4821	1.8	70.1252	1.7	141.642
1.7	10.5249	1.8	20.7439	1.8	35.6447	1.9	74.6334	1.8	151.175
1.8	11.2986	1.9	22.1897	1.9	38.1791	2	78.7835	1.9	160.222
1.9	12.0112	2	23.3775	2	40.1606	2.1	83.0059	2	168.85
2	12.8394	2.1	24.7074	2.1	42.4295	2.2	87.1804	2.1	177.367
2.1	13.6406	2.2	25.8328	2.2	44.3545	2.3	91.3837	2.2	185.24
2.2	14.243	2.3	27.1805	2.3	46.538	2.4	95.2549	2.3	193.248
2.3	15.0616	2.4	28.3404	2.4	48.5578	2.5	99.1153	2.4	200.756
2.4	15.7007	2.5	29.4721	2.5	50.4522	2.6	102.721	2.5	208.105
2.5	16.3655	2.6	30.5655	2.6	52.2355	2.7	106.431	2.6	215.183
2.6	17.0499	2.7	31.6789	2.7	54.248	2.8	109.789	2.7	222.182
2.7	17.7418	2.8	32.7746	2.8	56.1115	2.9	113.206	2.8	228.811
2.8	18.3825	2.9	33.9375	2.9	57.9554	3	116.694	2.9	235.328
2.9	18.9499	3	35.042	3	59.7911	3.1	120.109	3	241.711
3	19.583	3.1	36.1103	3.1	61.6274	3.2	123.529	3.1	248.062
3.1	20.2301	3.2	37.1716	3.2	63.4258	3.3	126.796	3.2	254.117
3.2	20.866	3.3	38.1661	3.3	65.0965	3.4	129.917	3.3	260.184
3.3	21.4386	3.4	39.1596	3.4	66.7815	3.5	133.018	3.4	265.984
3.4	22.0103	3.5	40.1338	3.5	68.3972	3.6	136.076	3.5	271.779
3.5	22.6323	3.6	41.0684	3.6	69.9931	3.7	139.084	3.6	277.321
3.6	23.2201	3.7	42.0393	3.7	71.5572	3.8	142.062	3.7	282.803
3.7	23.7687	3.8	42.9883	3.8	73.164	3.9	144.986	3.8	288.23
3.8	24.3408	3.9	43.9331	3.9	74.6898	4	147.875	3.9	293.579
3.9	24.8776	4	44.847	4	76.2453	4.1	150.708	4	298.829
4	25.4024	4.1	45.774	4.1	77.7848	4.2	153.452	4.1	303.998
4.1	25.9295	4.2	46.6744	4.2	79.2782	4.3	156.246	4.2	309.088
4.2	26.4425	4.3	47.565	4.3	80.7249	4.4	158.963	4.3	314.011
4.3	26.9584	4.4	48.4475	4.4	82.2121	4.5	161.717	4.4	319.005
4.4	27.4783	4.5	49.3087	4.5	83.6838	4.6	164.337	4.5	323.854
4.5	27.992	4.6	50.1844	4.6	85.1234	4.7	167.034	4.6	328.703
4.6	28.4947	4.7	51.0484	4.7	86.5707	4.8	169.573	4.7	333.44
4.7	28.9991	4.8	51.8988	4.8	87.992	4.9	172.134	4.8	338.075
4.8	29.4923	4.9	52.7454	4.9	89.3989	5	174.678	4.9	342.577
4.9	29.9906	5	53.5856	5	90.794	5.1	177.171	5	347.078
5	30.473	5.1	54.4067	5.1	92.1678	5.2	179.591	5.1	351.613
5.1	30.9512	5.2	55.2175	5.2	93.5229	5.3	182.006	5.2	356.022
5.2	31.43	5.3	56.0232	5.3	94.861	5.4	184.439	5.3	360.466
5.3	31.8992	5.4	56.8213	5.4	96.1846	5.5	186.878	5.4	364.882
5.4	32.3652	5.5	57.6103	5.5	97.4898	5.6	189.297	5.5	369.146
5.5	32.83	5.6	58.3846	5.6	98.7761	5.7	191.623	5.6	373.4
5.6	33.2809	5.7	59.1618	5.7	100.049	5.8	193.974	5.7	377.53
5.7	33.742	5.8	59.9243	5.8	101.305	5.9	196.253	5.8	381.64
5.8	34.1838	5.9	60.6793	5.9	102.55	6	198.595	5.9	385.665
5.9	34.626	6	61.4318	6	103.788	6.1	200.865	6	389.724
6	35.0623	6.1	62.1626	6.1	105.005	6.2	203.036	6.1	393.693
6.1	35.4995	6.2	62.8846	6.2	106.216	6.3	205.183	6.2	397.639
6.2	35.9204	6.3	63.6125	6.3	107.42	6.4	207.316	6.3	401.563
6.3	36.3339	6.4	64.3313	6.4	108.62	6.5	209.459	6.4	405.499
6.4	36.7505	6.5	65.0456	6.5	109.819	6.6	211.596	6.5	409.33
6.5	37.1776	6.6	65.7613	6.6	111.009	6.7	213.719	6.6	413.193
6.6	37.5968	6.7	66.4729	6.7	112.188	6.8	215.813	6.7	416.936
6.7	38.0099	6.8	67.1818	6.8	113.355	6.9	217.892	6.8	420.683
6.8	38.4192	6.9	67.8916	6.9	114.502	7	219.958	6.9	424.397
6.9	38.8253	7	68.5912	7	115.657	7.1	222.02	7	428.07
7	39.2375	7.1	69.2838	7.1	116.802	7.2	224.077	7.1	431.711
7.1	39.6416	7.2	69.9866	7.2	117.94	7.3	226.099	7.2	435.327
7.2	40.052	7.3	70.6773	7.3	119.062	7.4	228.107	7.3	438.859
7.3	40.4501	7.4	71.3677	7.4	120.176	7.5	230.105	7.4	442.453
7.4	40.8384	7.5	72.0415	7.5	121.284	7.6	232.102	7.5	445.934
7.5	41.2283	7.6	72.7163	7.6	122.387	7.7	234.079	7.6	449.46
7.6	41.6209	7.7	73.3816	7.7	123.482	7.8	236.036	7.7	452.898
7.7	42.006	7.8	74.0451	7.8	124.573	7.9	237.975	7.8	456.384
7.8	42.3831	7.9	74.7005	7.9	125.651	8	239.888	7.9	459.798
7.9	42.7685	8	75.347	8	126.715	8.1	241.793	8	463.129
8	43.1357	8.1	75.9908	8.1	127.775	8.2	243.689	8.1	466.492
8.1	43.5081	8.2	76.6218	8.2	128.829	8.3	245.577	8.2	469.823
8.2	43.8787	8.3	77.2598	8.3	129.875	8.4	247.464	8.3	473.106
8.3	44.2545	8.4	77.899	8.4	130.925	8.5	249.342	8.4	476.404
8.4	44.6302	8.5	78.5287	8.5	131.975	8.6	251.201	8.5	479.688
8.5	44.9974	8.6	79.1679	8.6	133.019	8.7	253.03	8.6	482.948
8.6	45.3728	8.7	79.7837	8.7	134.048	8.8	254.848	8.7	486.176
8.7	45.7288	8.8	80.403	8.8	135.074	8.9	256.676	8.8	489.398
8.8	46.0981	8.9	81.0298	8.9	136.103	9	258.484	8.9	492.646
8.9	46.4677	9	81.6455	9	137.117	9.1	260.277	9	495.828
9	46.8265	9.1	82.2605	9.1	138.117	9.2	262.065	9.1	499.014
9.1	47.1806	9.2	82.8785	9.2	139.115	9.3	263.839	9.2	502.101
9.2	47.5444	9.3	83.4915	9.3	140.101	9.4	265.6	9.3	505.199
9.3	47.9024	9.4	84.0919	9.4	141.082	9.5	267.342	9.4	508.287
9.4	48.2469	9.5	84.6788	9.5	142.048	9.6	269.075	9.5	511.315
9.5	48.5854	9.6	85.2772	9.6	143.014	9.7	270.815	9.6	514.353
9.6	48.9443	9.7	85.8827	9.7	143.981	9.8	272.548	9.7	517.383
9.7	49.3045	9.8	86.4832	9.8	144.947	9.9	274.261	9.8	520.391
9.8	49.6514	9.9	87.076	9.9	145.91	10	275.964	9.9	523.375
9.9	49.9906	10	87.6657	10	146.862	10.1	277.661	10	526.345
10	50.3337	10.1	88.2367	10.1	147.808	10.2	279.355	10.1	529.301
10.1	50.6688	10.2	88.8083	10.2	148.75	10.3	281.031	10.2	532.243
10.2	51.0011	10.3	89.3754	10.3	149.682	10.4	282.696	10.3	535.169
10.3	51.3232	10.4	89.9352	10.4	150.606	10.5	284.353	10.4	538.083
10.4	51.6655	10.5	90.4884	10.5	151.539	10.6	285.994	10.5	540.974
10.5	52.0081	10.6	91.0378	10.6	152.46	10.7	287.632	10.6	543.837
10.6	52.3284	10.7	91.5821	10.7	153.371	10.8	289.258	10.7	546.684
10.7	52.6508	10.8	92.1283	10.8	154.276	10.9	290.868	10.8	549.513
10.8	52.9713	10.9	92.6677	10.9	155.173	11	292.473	10.9	552.331
10.9	53.2917	11	93.2092	11	156.065	11.1	294.068	11	555.12
11	53.6151	11.1	93.7522	11.1	156.958	11.2	295.646	11.1	557.882
11.1	53.9366	11.2	94.2935	11.2	157.844	11.3	297.213	11.2	560.639
11.2	54.2587	11.3	94.8285	11.3	158.733	11.4	298.785	11.3	563.378
11.3	54.5771	11.4	95.3647	11.4	159.614	11.5	300.351	11.4	566.102
11.4	54.9034	11.5	95.8984	11.5	160.494	11.6	301.895	11.5	568.8
11.5	55.2136	11.6	96.4257	11.6	161.366	11.7	303.428	11.6	571.486
11.6	55.5213	11.7	96.9586	11.7	162.232	11.8	304.953	11.7	574.162
11.7	55.8351	11.8	97.4833	11.8	163.086	11.9	306.475	11.8	576.813
11.8	56.1417	11.9	98.0023	11.9	163.943	12	307.99	11.9	579.455
11.9	56.4516	12	98.5161	12	164.791	12.1	309.506	12	582.076
12	56.7602	12.1	99.037	12.1	165.633	12.2	311.018	12.1	584.682
12.1	57.0703	12.2	99.5549	12.2	166.468	12.3	312.521	12.2	587.282
12.2	57.3725	12.3	100.065	12.3	167.304	12.4	314.02	12.3	589.869
12.3	57.6645	12.4	100.574	12.4	168.14	12.5	315.514	12.4	592.438
12.4	57.9743	12.5	101.084	12.5	168.976	12.6	316.996	12.5	594.988
12.5	58.2789	12.6	101.587	12.6	169.81	12.7	318.467	12.6	597.525
12.6	58.5718	12.7	102.09	12.7	170.634	12.8	319.941	12.7	600.05
12.7	58.8719	12.8	102.58	12.8	171.455	12.9	321.414	12.8	602.556
12.8	59.1677	12.9	103.066	12.9	172.272	13	322.879	12.9	605.049
12.9	59.4595	13	103.557	13	173.084	13.1	324.341	13	607.524
13	59.7531	13.1	104.049	13.1	173.892	13.2	325.788	13.1	609.991
13.1	60.0314	13.2	104.538	13.2	174.702	13.3	327.212	13.2	612.462
13.2	60.3122	13.3	105.018	13.3	175.513	13.4	328.632	13.3	614.906
13.3	60.6006	13.4	105.499	13.4	176.306	13.5	330.05	13.4	617.32
13.4	60.8742	13.5	105.976	13.5	177.095	13.6	331.458	13.5	619.722
13.5	61.1467	13.6	106.452	13.6	177.889	13.7	332.866	13.6	622.12
13.6	61.4252	13.7	106.928	13.7	178.674	13.8	334.279	13.7	624.503
13.7	61.7062	13.8	107.401	13.8	179.462	13.9	335.672	13.8	626.871
13.8	61.981	13.9	107.872	13.9	180.246	14	337.058	13.9	629.223
13.9	62.2465	14	108.335	14	181.02	14.1	338.443	14	631.559
14	62.4997	14.1	108.799	14.1	181.802	14.2	339.815	14.1	633.9
14.1	62.7655	14.2	109.259	14.2	182.576	14.3	341.195	14.2	636.226
14.2	63.0363	14.3	109.716	14.3	183.352	14.4	342.576	14.3	638.528
14.3	63.3083	14.4	110.165	14.4	184.115	14.5	343.947	14.4	640.824
14.4	63.572	14.5	110.612	14.5	184.876	14.6	345.301	14.5	643.109
14.5	63.8509	14.6	111.073	14.6	185.642	14.7	346.652	14.6	645.383
14.6	64.1194	14.7	111.528	14.7	186.404	14.8	348.004	14.7	647.655
14.7	64.3787	14.8	111.977	14.8	187.169	14.9	349.348	14.8	649.923
14.8	64.6407	14.9	112.438	14.9	187.931	15	350.688	14.9	652.183
14.9	64.9048	15	112.901	15	188.682	15.1	352.015	15	654.432
15	65.1854	15.1	113.356	15.1	189.428	15.2	353.334	15.1	656.671
15.1	65.4587	15.2	113.805	15.2	190.174	15.3	354.66	15.2	658.894
15.2	65.7287	15.3	114.26	15.3	190.922	15.4	355.976	15.3	661.109
15.3	65.9935	15.4	114.706	15.4	191.667	15.5	357.278	15.4	663.315
15.4	66.2484	15.5	115.159	15.5	192.403	15.6	358.595	15.5	665.516
15.5	66.4996	15.6	115.609	15.6	193.144	15.7	359.912	15.6	667.711
15.6	66.7545	15.7	116.047	15.7	193.886	15.8	361.221	15.7	669.888
15.7	67.0168	15.8	116.491	15.8	194.619	15.9	362.521	15.8	672.05
15.8	67.2786	15.9	116.947	15.9	195.347	16	363.812	15.9	674.195
15.9	67.5316	16	117.394	16	196.076	16.1	365.098	16	676.332
16	67.7839	16.1	117.831	16.1	196.801	16.2	366.388	16.1	678.466
16.1	68.0339	16.2	118.261	16.2	197.529	16.3	367.677	16.2	680.592
16.2	68.2892	16.3	118.695	16.3	198.245	16.4	368.951	16.3	682.702
16.3	68.5429	16.4	119.133	16.4	198.965	16.5	370.221	16.4	684.806
16.4	68.8041	16.5	119.568	16.5	199.684	16.6	371.503	16.5	686.909
16.5	69.0643	16.6	120.006	16.6	200.408	16.7	372.779	16.6	688.997
16.6	69.3132	16.7	120.441	16.7	201.124	16.8	374.039	16.7	691.066
16.7	69.567	16.8	120.877	16.8	201.827	16.9	375.288	16.8	693.138
16.8	69.8183	16.9	121.305	16.9	202.527	17	376.532	16.9	695.203
16.9	70.0623	17	121.717	17	203.231	17.1	377.784	17	697.256
17	70.3055	17.1	122.133	17.1	203.94	17.2	379.038	17.1	699.305
17.1	70.5591	17.2	122.551	17.2	204.651	17.3	380.283	17.2	701.342
17.2	70.8123	17.3	122.98	17.3	205.357	17.4	381.511	17.3	703.362
17.3	71.0623	17.4	123.396	17.4	206.053	17.5	382.747	17.4	705.38
17.4	71.3066	17.5	123.811	17.5	206.746	17.6	383.985	17.5	707.393
17.5	71.5522	17.6	124.229	17.6	207.438	17.7	385.206	17.6	709.384
17.6	71.7976	17.7	124.635	17.7	208.129	17.8	386.421	17.7	711.361
17.7	72.039	17.8	125.041	17.8	208.823	17.9	387.634	17.8	713.348
17.8	72.272	17.9	125.451	17.9	209.511	18	388.842	17.9	715.324
17.9	72.5004	18	125.857	18	210.202	18.1	390.052	18	717.277
18	72.7272	18.1	126.264	18.1	210.895	18.2	391.26	18.1	719.221
18.1	72.9643	18.2	126.668	18.2	211.586	18.3	392.453	18.2	721.157
18.2	73.1994	18.3	127.072	18.3	212.265	18.4	393.64	18.3	723.077
18.3	73.4244	18.4	127.464	18.4	212.939	18.5	394.84	18.4	725.003
18.4	73.6485	18.5	127.865	18.5	213.616	18.6	396.028	18.5	726.918
18.5	73.8727	18.6	128.264	18.6	214.293	18.7	397.205	18.6	728.807
18.6	74.1009	18.7	128.656	18.7	214.97	18.8	398.377	18.7	730.689
18.7	74.3231	18.8	129.054	18.8	215.646	18.9	399.543	18.8	732.572
18.8	74.5596	18.9	129.456	18.9	216.318	19	400.708	18.9	734.45
18.9	74.8014	19	129.855	19	216.982	19.1	401.874	19	736.324
19	75.0417	19.1	130.247	19.1	217.64	19.2	403.029	19.1	738.188
19.1	75.2753	19.2	130.644	19.2	218.296	19.3	404.187	19.2	740.045
19.2	75.5097	19.3	131.04	19.3	218.936	19.4	405.352	19.3	741.909
19.3	75.7453	19.4	131.429	19.4	219.564	19.5	406.51	19.4	743.768
19.4	75.9733	19.5	131.822	19.5	220.207	19.6	407.658	19.5	745.608
19.5	76.2081	19.6	132.207	19.6	220.855	19.7	408.805	19.6	747.433
19.6	76.4474	19.7	132.59	19.7	221.495	19.8	409.954	19.7	749.258
19.7	76.6664	19.8	132.974	19.8	222.137	19.9	411.099	19.8	751.086
19.8	76.8775	19.9	133.352	19.9	222.782	20	412.245	19.9	752.909
19.9	77.096	20	133.726	20	223.421	20.1	413.391	20	754.715
20	77.3146	20.1	134.11	20.1	224.071	20.2	414.52	20.1	756.511
20.1	77.5351	20.2	134.49	20.2	224.723	20.3	415.664	20.2	758.3
20.2	77.754	20.3	134.867	20.3	225.365	20.4	416.799	20.3	760.09
20.3	77.971	20.4	135.248	20.4	226.009	20.5	417.919	20.4	761.861
20.4	78.185	20.5	135.624	20.5	226.662	20.6	419.034	20.5	763.618
20.5	78.4134	20.6	135.995	20.6	227.314	20.7	420.143	20.6	765.368
20.6	78.6299	20.7	136.366	20.7	227.952	20.8	421.257	20.7	767.119
20.7	78.8393	20.8	136.744	20.8	228.595	20.9	422.361	20.8	768.867
20.8	79.0574	20.9	137.127	20.9	229.231	21	423.468	20.9	770.592
20.9	79.2772	21	137.501	21	229.858	21.1	424.577	21	772.309
21	79.4933	21.1	137.872	21.1	230.486	21.2	425.681	21.1	774.023
21.1	79.7122	21.2	138.246	21.2	231.11	21.3	426.785	21.2	775.733
21.2	79.9307	21.3	138.619	21.3	231.73	21.4	427.88	21.3	777.43
21.3	80.1438	21.4	138.989	21.4	232.35	21.5	428.969	21.4	779.119
21.4	80.3576	21.5	139.361	21.5	232.969	21.6	430.057	21.5	780.801
21.5	80.5679	21.6	139.732	21.6	233.595	21.7	431.145	21.6	782.477
21.6	80.7762	21.7	140.1	21.7	234.215	21.8	432.241	21.7	784.15
21.7	80.9767	21.8	140.465	21.8	234.83	21.9	433.328	21.8	785.814
21.8	81.188	21.9	140.818	21.9	235.434	22	434.407	21.9	787.462
21.9	81.3972	22	141.166	22	236.047	22.1	435.469	22	789.112
22	81.6083	22.1	141.525	22.1	236.656	22.2	436.532	22.1	790.753
22.1	81.8098	22.2	141.885	22.2	237.263	22.3	437.591	22.2	792.384
22.2	82.0106	22.3	142.239	22.3	237.875	22.4	438.659	22.3	794.004
22.3	82.2058	22.4	142.602	22.4	238.5	22.5	439.718	22.4	795.631
22.4	82.4011	22.5	142.955	22.5	239.113	22.6	440.777	22.5	797.255
22.5	82.6011	22.6	143.308	22.6	239.726	22.7	441.825	22.6	798.865
22.6	82.7989	22.7	143.66	22.7	240.33	22.8	442.871	22.7	800.461
22.7	82.9986	22.8	144.02	22.8	240.929	22.9	443.917	22.8	802.046
22.8	83.1986	22.9	144.383	22.9	241.53	23	444.97	22.9	803.617
22.9	83.3967	23	144.741	23	242.134	23.1	446.017	23	805.201
23	83.6001	23.1	145.098	23.1	242.733	23.2	447.056	23.1	806.775
23.1	83.8037	23.2	145.444	23.2	243.328	23.3	448.092	23.2	808.336
23.2	84.0021	23.3	145.794	23.3	243.927	23.4	449.14	23.3	809.896
23.3	84.1957	23.4	146.147	23.4	244.52	23.5	450.18	23.4	811.456
23.4	84.3913	23.5	146.49	23.5	245.102	23.6	451.206	23.5	813.013
23.5	84.5877	23.6	146.835	23.6	245.687	23.7	452.228	23.6	814.559
23.6	84.7961	23.7	147.173	23.7	246.272	23.8	453.251	23.7	816.096
23.7	85.0106	23.8	147.504	23.8	246.854	23.9	454.275	23.8	817.631
23.8	85.2154	23.9	147.84	23.9	247.444	24	455.299	23.9	819.17
23.9	85.42	24	148.177	24	248.028	24.1	456.312	24	820.701
24	85.615	24.1	148.516	24.1	248.616	24.2	457.311	24.1	822.224
24.1	85.8106	24.2	148.851	24.2	249.198	24.3	458.328	24.2	823.733
24.2	86.0119	24.3	149.19	24.3	249.787	24.4	459.336	24.3	825.236
24.3	86.2166	24.4	149.527	24.4	250.362	24.5	460.323	24.4	826.741
24.4	86.4229	24.5	149.867	24.5	250.937	24.6	461.311	24.5	828.246
24.5	86.6228	24.6	150.208	24.6	251.521	24.7	462.304	24.6	829.735
24.6	86.8156	24.7	150.542	24.7	252.11	24.8	463.295	24.7	831.213
24.7	87.0202	24.8	150.882	24.8	252.69	24.9	464.281	24.8	832.699
24.8	87.2258	24.9	151.222	24.9	253.263	25	465.256	24.9	834.178
24.9	87.4115	25	151.559	25	253.828	25.1	466.222	25	835.64
25	87.591	25.1	151.887	25.1	254.4	25.2	467.196	25.1	837.097
25.1	87.7761	25.2	152.224	25.2	254.975	25.3	468.18	25.2	838.545
25.2	87.9627	25.3	152.559	25.3	255.551	25.4	469.159	25.3	839.997
25.3	88.1455	25.4	152.895	25.4	256.117	25.5	470.137	25.4	841.449
25.4	88.3354	25.5	153.234	25.5	256.691	25.6	471.114	25.5	842.893
25.5	88.529	25.6	153.571	25.6	257.265	25.7	472.086	25.6	844.325
25.6	88.719	25.7	153.906	25.7	257.835	25.8	473.063	25.7	845.751
25.7	88.9033	25.8	154.239	25.8	258.394	25.9	474.035	25.8	847.182
25.8	89.0833	25.9	154.573	25.9	258.951	26	475.006	25.9	848.603
25.9	89.2712	26	154.908	26	259.513	26.1	475.975	26	850.015
26	89.4523	26.1	155.241	26.1	260.076	26.2	476.944	26.1	851.433
26.1	89.6338	26.2	155.568	26.2	260.638	26.3	477.905	26.2	852.848
26.2	89.8259	26.3	155.89	26.3	261.187	26.4	478.859	26.3	854.266
26.3	90.0214	26.4	156.223	26.4	261.739	26.5	479.819	26.4	855.669
26.4	90.2114	26.5	156.549	26.5	262.3	26.6	480.789	26.5	857.056
26.5	90.4018	26.6	156.871	26.6	262.859	26.7	481.759	26.6	858.447
26.6	90.5878	26.7	157.195	26.7	263.413	26.8	482.723	26.7	859.836
26.7	90.7752	26.8	157.521	26.8	263.956	26.9	483.677	26.8	861.228
26.8	90.9613	26.9	157.849	26.9	264.501	27	484.627	26.9	862.616
26.9	91.1492	27	158.173	27	265.057	27.1	485.579	27	863.991
27	91.3372	27.1	158.481	27.1	265.615	27.2	486.527	27.1	865.353
27.1	91.5231	27.2	158.795	27.2	266.166	27.3	487.468	27.2	866.723
27.2	91.7095	27.3	159.116	27.3	266.708	27.4	488.411	27.3	868.093
27.3	91.8953	27.4	159.434	27.4	267.25	27.5	489.349	27.4	869.446
27.4	92.0814	27.5	159.753	27.5	267.787	27.6	490.274	27.5	870.794
27.5	92.2738	27.6	160.068	27.6	268.324	27.7	491.195	27.6	872.143
27.6	92.466	27.7	160.394	27.7	268.871	27.8	492.111	27.7	873.492
27.7	92.6504	27.8	160.709	27.8	269.418	27.9	493.035	27.8	874.832
27.8	92.83	27.9	161.02	27.9	269.965	28	493.961	27.9	876.163
27.9	93.0108	28	161.343	28	270.52	28.1	494.886	28	877.502
28	93.1919	28.1	161.664	28.1	271.064	28.2	495.81	28.1	878.838
28.1	93.3738	28.2	161.995	28.2	271.597	28.3	496.733	28.2	880.16
28.2	93.5594	28.3	162.322	28.3	272.144	28.4	497.658	28.3	881.463
28.3	93.7381	28.4	162.644	28.4	272.683	28.5	498.586	28.4	882.773
28.4	93.9137	28.5	162.968	28.5	273.218	28.6	499.513	28.5	884.081
28.5	94.0953	28.6	163.281	28.6	273.755	28.7	500.435	28.6	885.384
28.6	94.2719	28.7	163.591	28.7	274.292	28.8	501.367	28.7	886.681
28.7	94.4436	28.8	163.91	28.8	274.827	28.9	502.288	28.8	887.979
28.8	94.6202	28.9	164.225	28.9	275.351	29	503.202	28.9	889.273
28.9	94.7964	29	164.538	29	275.867	29.1	504.114	29	890.555
29	94.9764	29.1	164.839	29.1	276.385	29.2	505.024	29.1	891.818
29.1	95.1512	29.2	165.143	29.2	276.911	29.3	505.928	29.2	893.082
29.2	95.3249	29.3	165.458	29.3	277.432	29.4	506.829	29.3	894.359
29.3	95.5064	29.4	165.771	29.4	277.955	29.5	507.726	29.4	895.634
29.4	95.6878	29.5	166.082	29.5	278.486	29.6	508.623	29.5	896.888
29.5	95.8688	29.6	166.39	29.6	279.015	29.7	509.513	29.6	898.152
29.6	96.0533	29.7	166.696	29.7	279.535	29.8	510.405	29.7	899.413
29.7	96.232	29.8	167.007	29.8	280.044	29.9	511.292	29.8	900.663
29.8	96.4111	29.9	167.318	29.9	280.556	30	512.18	29.9	901.91
29.9	96.5933	30	167.63	30	281.075	30.1	513.067	30	903.152
30	96.7781	30.1	167.944	30.1	281.604	30.2	513.951	30.1	904.397
30.1	96.9575	30.2	168.261	30.2	282.13	30.3	514.827	30.2	905.646
30.2	97.144	30.3	168.569	30.3	282.65	30.4	515.706	30.3	906.89
30.3	97.336	30.4	168.876	30.4	283.175	30.5	516.593	30.4	908.127
30.4	97.5221	30.5	169.185	30.5	283.69	30.6	517.475	30.5	909.362
30.5	97.701	30.6	169.486	30.6	284.194	30.7	518.355	30.6	910.577
30.6	97.8731	30.7	169.794	30.7	284.71	30.8	519.235	30.7	911.788
30.7	98.0425	30.8	170.101	30.8	285.231	30.9	520.115	30.8	912.996
30.8	98.2126	30.9	170.408	30.9	285.75	31	520.997	30.9	914.208
30.9	98.3912	31	170.719	31	286.266	31.1	521.86	31	915.423
31	98.5738	31.1	171.02	31.1	286.787	31.2	522.717	31.1	916.633
31.1	98.7539	31.2	171.323	31.2	287.305	31.3	523.581	31.2	917.839
31.2	98.9349	31.3	171.639	31.3	287.813	31.4	524.455	31.3	919.03
31.3	99.1136	31.4	171.935	31.4	288.319	31.5	525.32	31.4	920.219
31.4	99.2808	31.5	172.225	31.5	288.826	31.6	526.182	31.5	921.408
31.5	99.4505	31.6	172.519	31.6	289.335	31.7	527.039	31.6	922.596
31.6	99.6175	31.7	172.812	31.7	289.842	31.8	527.892	31.7	923.793
31.7	99.7855	31.8	173.112	31.8	290.344	31.9	528.735	31.8	924.982
31.8	99.9532	31.9	173.409	31.9	290.839	32	529.587	31.9	926.161
31.9	100.111	32	173.7	32	291.343	32.1	530.439	32	927.335
32	100.274	32.1	173.993	32.1	291.856	32.2	531.293	32.1	928.503
32.1	100.443	32.2	174.293	32.2	292.358	32.3	532.151	32.2	929.669
32.2	100.614	32.3	174.583	32.3	292.852	32.4	533.002	32.3	930.827
32.3	100.781	32.4	174.874	32.4	293.354	32.5	533.839	32.4	931.981
32.4	100.944	32.5	175.169	32.5	293.856	32.6	534.678	32.5	933.135
32.5	101.107	32.6	175.47	32.6	294.353	32.7	535.509	32.6	934.286
32.6	101.267	32.7	175.768	32.7	294.844	32.8	536.343	32.7	935.424
32.7	101.44	32.8	176.059	32.8	295.328	32.9	537.178	32.8	936.556
32.8	101.616	32.9	176.35	32.9	295.82	33	538.009	32.9	937.689
32.9	101.79	33	176.647	33	296.314	33.1	538.841	33	938.818
33	101.961	33.1	176.948	33.1	296.806	33.2	539.668	33.1	939.948
33.1	102.134	33.2	177.241	33.2	297.292	33.3	540.505	33.2	941.072
33.2	102.305	33.3	177.525	33.3	297.78	33.4	541.33	33.3	942.19
33.3	102.476	33.4	177.818	33.4	298.275	33.5	542.152	33.4	943.306
33.4	102.653	33.5	178.115	33.5	298.762	33.6	542.981	33.5	944.43
33.5	102.831	33.6	178.408	33.6	299.24	33.7	543.807	33.6	945.54
33.6	103.002	33.7	178.7	33.7	299.714	33.8	544.627	33.7	946.651
33.7	103.165	33.8	178.98	33.8	300.195	33.9	545.447	33.8	947.765
33.8	103.332	33.9	179.272	33.9	300.682	34	546.253	33.9	948.873
33.9	103.504	34	179.553	34	301.15	34.1	547.065	34	949.965
34	103.677	34.1	179.834	34.1	301.614	34.2	547.875	34.1	951.052
34.1	103.851	34.2	180.123	34.2	302.077	34.3	548.673	34.2	952.14
34.2	104.021	34.3	180.417	34.3	302.54	34.4	549.477	34.3	953.226
34.3	104.185	34.4	180.71	34.4	303	34.5	550.284	34.4	954.306
34.4	104.352	34.5	180.998	34.5	303.46	34.6	551.082	34.5	955.381
34.5	104.521	34.6	181.272	34.6	303.917	34.7	551.867	34.6	956.45
34.6	104.683	34.7	181.556	34.7	304.383	34.8	552.664	34.7	957.514
34.7	104.84	34.8	181.848	34.8	304.86	34.9	553.461	34.8	958.58
34.8	105	34.9	182.14	34.9	305.338	35	554.248	34.9	959.645
34.9	105.158	35	182.429	35	305.813	35.1	555.042	35	960.708
35	105.318	35.1	182.723	35.1	306.28	35.2	555.833	35.1	961.776
35.1	105.481	35.2	183.016	35.2	306.746	35.3	556.619	35.2	962.848
35.2	105.653	35.3	183.304	35.3	307.221	35.4	557.398	35.3	963.913
35.3	105.819	35.4	183.59	35.4	307.689	35.5	558.171	35.4	964.964
35.4	105.98	35.5	183.875	35.5	308.159	35.6	558.948	35.5	966.014
35.5	106.141	35.6	184.155	35.6	308.628	35.7	559.725	35.6	967.072
35.6	106.301	35.7	184.435	35.7	309.096	35.8	560.513	35.7	968.122
35.7	106.458	35.8	184.709	35.8	309.56	35.9	561.291	35.8	969.176
35.8	106.611	35.9	184.989	35.9	310.02	36	562.073	35.9	970.221
35.9	106.767	36	185.274	36	310.481	36.1	562.853	36	971.252
36	106.922	36.1	185.558	36.1	310.94	36.2	563.626	36.1	972.284
36.1	107.08	36.2	185.837	36.2	311.411	36.3	564.398	36.2	973.323
36.2	107.238	36.3	186.107	36.3	311.88	36.4	565.177	36.3	974.357
36.3	107.4	36.4	186.384	36.4	312.344	36.5	565.954	36.4	975.387
36.4	107.574	36.5	186.664	36.5	312.808	36.6	566.733	36.5	976.423
36.5	107.731	36.6	186.947	36.6	313.273	36.7	567.509	36.6	977.449
36.6	107.886	36.7	187.24	36.7	313.737	36.8	568.28	36.7	978.472
36.7	108.042	36.8	187.533	36.8	314.199	36.9	569.042	36.8	979.504
36.8	108.207	36.9	187.816	36.9	314.665	37	569.81	36.9	980.529
36.9	108.366	37	188.093	37	315.133	37.1	570.567	37	981.555
37	108.52	37.1	188.366	37.1	315.599	37.2	571.328	37.1	982.582
37.1	108.677	37.2	188.636	37.2	316.059	37.3	572.092	37.2	983.611
37.2	108.839	37.3	188.91	37.3	316.512	37.4	572.847	37.3	984.627
37.3	108.995	37.4	189.188	37.4	316.965	37.5	573.611	37.4	985.625
37.4	109.16	37.5	189.471	37.5	317.419	37.6	574.376	37.5	986.629
37.5	109.323	37.6	189.747	37.6	317.876	37.7	575.127	37.6	987.625
37.6	109.479	37.7	190.017	37.7	318.328	37.8	575.886	37.7	988.622
37.7	109.637	37.8	190.279	37.8	318.781	37.9	576.639	37.8	989.621
37.8	109.796	37.9	190.546	37.9	319.236	38	577.397	37.9	990.61
37.9	109.951	38	190.824	38	319.696	38.1	578.145	38	991.61
38	110.109	38.1	191.103	38.1	320.151	38.2	578.893	38.1	992.606
38.1	110.271	38.2	191.383	38.2	320.601	38.3	579.643	38.2	993.601
38.2	110.435	38.3	191.663	38.3	321.055	38.4	580.39	38.3	994.592
38.3	110.596	38.4	191.941	38.4	321.513	38.5	581.146	38.4	995.578
38.4	110.758	38.5	192.222	38.5	321.976	38.6	581.896	38.5	996.563
38.5	110.919	38.6	192.502	38.6	322.436	38.7	582.637	38.6	997.55
38.6	111.081	38.7	192.778	38.7	322.881	38.8	583.379	38.7	998.535
38.7	111.241	38.8	193.053	38.8	323.319	38.9	584.113	38.8	999.517
38.8	111.399	38.9	193.332	38.9	323.763	39	584.862	38.9	1000.5
38.9	111.556	39	193.612	39	324.217	39.1	585.609	39	1001.49
39	111.719	39.1	193.885	39.1	324.661	39.2	586.346	39.1	1002.47
39.1	111.878	39.2	194.146	39.2	325.097	39.3	587.1	39.2	1003.44
39.2	112.033	39.3	194.409	39.3	325.534	39.4	587.84	39.3	1004.41
39.3	112.191	39.4	194.68	39.4	325.972	39.5	588.578	39.4	1005.37
39.4	112.349	39.5	194.957	39.5	326.409	39.6	589.311	39.5	1006.35
39.5	112.511	39.6	195.215	39.6	326.84	39.7	590.046	39.6	1007.32
39.6	112.669	39.7	195.476	39.7	327.277	39.8	590.78	39.7	1008.3
39.7	112.828	39.8	195.744	39.8	327.717	39.9	591.506	39.8	1009.26
39.8	112.99	39.9	196.003	39.9	328.148	40	592.229	39.9	1010.22
39.9	113.147	40	196.261	40	328.571	40.1	592.951	40	1011.18
40	113.3	40.1	196.52	40.1	329.004	40.2	593.671	40.1	1012.14
40.1	113.45	40.2	196.777	40.2	329.432	40.3	594.385	40.2	1013.09
40.2	113.607	40.3	197.049	40.3	329.86	40.4	595.098	40.3	1014.04
40.3	113.77	40.4	197.327	40.4	330.295	40.5	595.815	40.4	1014.98
40.4	113.93	40.5	197.594	40.5	330.721	40.6	596.532	40.5	1015.93
40.5	114.085	40.6	197.853	40.6	331.144	40.7	597.243	40.6	1016.87
40.6	114.242	40.7	198.12	40.7	331.571	40.8	597.951	40.7	1017.81
40.7	114.396	40.8	198.385	40.8	332.004	40.9	598.664	40.8	1018.74
40.8	114.545	40.9	198.652	40.9	332.43	41	599.367	40.9	1019.67
40.9	114.696	41	198.922	41	332.858	41.1	600.084	41	1020.61
41	114.849	41.1	199.193	41.1	333.295	41.2	600.801	41.1	1021.54
41.1	115.001	41.2	199.466	41.2	333.728	41.3	601.506	41.2	1022.48
41.2	115.158	41.3	199.731	41.3	334.153	41.4	602.218	41.3	1023.42
41.3	115.307	41.4	199.989	41.4	334.581	41.5	602.929	41.4	1024.35
41.4	115.457	41.5	200.244	41.5	335.009	41.6	603.629	41.5	1025.28
41.5	115.607	41.6	200.498	41.6	335.433	41.7	604.336	41.6	1026.2
41.6	115.756	41.7	200.756	41.7	335.863	41.8	605.047	41.7	1027.12
41.7	115.909	41.8	201.017	41.8	336.296	41.9	605.76	41.8	1028.04
41.8	116.064	41.9	201.29	41.9	336.724	42	606.472	41.9	1028.96
41.9	116.216	42	201.557	42	337.148	42.1	607.183	42	1029.88
42	116.366	42.1	201.815	42.1	337.573	42.2	607.877	42.1	1030.78
42.1	116.516	42.2	202.075	42.2	337.993	42.3	608.57	42.2	1031.69
42.2	116.664	42.3	202.344	42.3	338.412	42.4	609.268	42.3	1032.59
42.3	116.815	42.4	202.611	42.4	338.839	42.5	609.954	42.4	1033.49
42.4	116.972	42.5	202.874	42.5	339.256	42.6	610.638	42.5	1034.39
42.5	117.125	42.6	203.138	42.6	339.674	42.7	611.327	42.6	1035.3
42.6	117.275	42.7	203.405	42.7	340.099	42.8	612.012	42.7	1036.21
42.7	117.43	42.8	203.666	42.8	340.526	42.9	612.693	42.8	1037.11
42.8	117.586	42.9	203.929	42.9	340.953	43	613.374	42.9	1038.01
42.9	117.736	43	204.188	43	341.377	43.1	614.056	43	1038.91
43	117.884	43.1	204.44	43.1	341.808	43.2	614.739	43.1	1039.8
43.1	118.037	43.2	204.693	43.2	342.241	43.3	615.435	43.2	1040.68
43.2	118.185	43.3	204.953	43.3	342.666	43.4	616.124	43.3	1041.55
43.3	118.336	43.4	205.209	43.4	343.088	43.5	616.808	43.4	1042.43
43.4	118.483	43.5	205.467	43.5	343.511	43.6	617.493	43.5	1043.31
43.5	118.63	43.6	205.727	43.6	343.93	43.7	618.179	43.6	1044.18
43.6	118.782	43.7	205.979	43.7	344.352	43.8	618.87	43.7	1045.04
43.7	118.932	43.8	206.233	43.8	344.776	43.9	619.544	43.8	1045.9
43.8	119.083	43.9	206.491	43.9	345.187	44	620.216	43.9	1046.76
43.9	119.231	44	206.745	44	345.59	44.1	620.882	44	1047.61
44	119.381	44.1	206.996	44.1	345.989	44.2	621.545	44.1	1048.46
44.1	119.527	44.2	207.253	44.2	346.39	44.3	622.208	44.2	1049.33
44.2	119.68	44.3	207.51	44.3	346.779	44.4	622.868	44.3	1050.19
44.3	119.83	44.4	207.766	44.4	347.178	44.5	623.531	44.4	1051.05
44.4	119.976	44.5	208.028	44.5	347.585	44.6	624.197	44.5	1051.91
44.5	120.119	44.6	208.283	44.6	347.977	44.7	624.868	44.6	1052.77
44.6	120.265	44.7	208.53	44.7	348.37	44.8	625.53	44.7	1053.63
44.7	120.416	44.8	208.787	44.8	348.778	44.9	626.192	44.8	1054.48
44.8	120.565	44.9	209.057	44.9	349.185	45	626.844	44.9	1055.33
44.9	120.711	45	209.324	45	349.591	45.1	627.491	45	1056.18
45	120.863	45.1	209.584	45.1	349.999	45.2	628.153	45.1	1057.03
45.1	121.018	45.2	209.838	45.2	350.41	45.3	628.822	45.2	1057.88
45.2	121.173	45.3	210.09	45.3	350.815	45.4	629.484	45.3	1058.71
45.3	121.322	45.4	210.339	45.4	351.219	45.5	630.142	45.4	1059.55
45.4	121.47	45.5	210.589	45.5	351.621	45.6	630.796	45.5	1060.38
45.5	121.621	45.6	210.84	45.6	352.023	45.7	631.45	45.6	1061.21
45.6	121.772	45.7	211.093	45.7	352.433	45.8	632.105	45.7	1062.04
45.7	121.924	45.8	211.355	45.8	352.843	45.9	632.758	45.8	1062.87
45.8	122.069	45.9	211.609	45.9	353.243	46	633.414	45.9	1063.71
45.9	122.21	46	211.86	46	353.643	46.1	634.073	46	1064.54
46	122.36	46.1	212.111	46.1	354.047	46.2	634.732	46.1	1065.37
46.1	122.505	46.2	212.366	46.2	354.438	46.3	635.384	46.2	1066.2
46.2	122.654	46.3	212.619	46.3	354.833	46.4	636.026	46.3	1067.02
46.3	122.803	46.4	212.873	46.4	355.23	46.5	636.669	46.4	1067.85
46.4	122.947	46.5	213.124	46.5	355.619	46.6	637.318	46.5	1068.67
46.5	123.083	46.6	213.369	46.6	356.015	46.7	637.953	46.6	1069.5
46.6	123.228	46.7	213.609	46.7	356.414	46.8	638.595	46.7	1070.34
46.7	123.366	46.8	213.855	46.8	356.81	46.9	639.238	46.8	1071.16
46.8	123.496	46.9	214.105	46.9	357.2	47	639.884	46.9	1071.98
46.9	123.635	47	214.359	47	357.591	47.1	640.535	47	1072.8
47	123.78	47.1	214.608	47.1	357.981	47.2	641.184	47.1	1073.62
47.1	123.924	47.2	214.856	47.2	358.373	47.3	641.82	47.2	1074.44
47.2	124.068	47.3	215.083	47.3	358.772	47.4	642.457	47.3	1075.25
47.3	124.206	47.4	215.326	47.4	359.175	47.5	643.099	47.4	1076.06
47.4	124.349	47.5	215.586	47.5	359.582	47.6	643.736	47.5	1076.88
47.5	124.497	47.6	215.84	47.6	359.998	47.7	644.373	47.6	1077.7
47.6	124.643	47.7	216.089	47.7	360.402	47.8	645.016	47.7	1078.51
47.7	124.786	47.8	216.337	47.8	360.797	47.9	645.656	47.8	1079.31
47.8	124.939	47.9	216.578	47.9	361.193	48	646.285	47.9	1080.11
47.9	125.084	48	216.818	48	361.592	48.1	646.913	48	1080.91
48	125.226	48.1	217.055	48.1	361.991	48.2	647.542	48.1	1081.72
48.1	125.366	48.2	217.302	48.2	362.39	48.3	648.176	48.2	1082.53
48.2	125.518	48.3	217.556	48.3	362.791	48.4	648.818	48.3	1083.33
48.3	125.668	48.4	217.822	48.4	363.179	48.5	649.453	48.4	1084.13
48.4	125.816	48.5	218.081	48.5	363.568	48.6	650.09	48.5	1084.93
48.5	125.966	48.6	218.326	48.6	363.955	48.7	650.733	48.6	1085.72
48.6	126.116	48.7	218.573	48.7	364.338	48.8	651.371	48.7	1086.51
48.7	126.262	48.8	218.826	48.8	364.723	48.9	652	48.8	1087.29
48.8	126.401	48.9	219.079	48.9	365.112	49	652.632	48.9	1088.08
48.9	126.546	49	219.335	49	365.499	49.1	653.266	49	1088.87
49	126.685	49.1	219.597	49.1	365.898	49.2	653.889	49.1	1089.66
49.1	126.834	49.2	219.857	49.2	366.295	49.3	654.516	49.2	1090.44
49.2	126.987	49.3	220.103	49.3	366.689	49.4	655.134	49.3	1091.22
49.3	127.134	49.4	220.333	49.4	367.068	49.5	655.744	49.4	1092
49.4	127.278	49.5	220.565	49.5	367.45	49.6	656.365	49.5	1092.79
49.5	127.417	49.6	220.81	49.6	367.831	49.7	656.99	49.6	1093.58
49.6	127.561	49.7	221.058	49.7	368.218	49.8	657.599	49.7	1094.37
49.7	127.697	49.8	221.308	49.8	368.6	49.9	658.196	49.8	1095.15
49.8	127.843	49.9	221.546	49.9	368.975	50	658.809	49.9	1095.92
49.9	127.979	50	221.797	50	369.365	50.1	659.416	50	1096.7
50	128.116	50.1	222.049	50.1	369.746	50.2	660.032	50.1	1097.48
50.1	128.254	50.2	222.29	50.2	370.122	50.3	660.641	50.2	1098.25
50.2	128.394	50.3	222.526	50.3	370.493	50.4	661.248	50.3	1099.01
50.3	128.539	50.4	222.778	50.4	370.87	50.5	661.859	50.4	1099.78
50.4	128.685	50.5	223.037	50.5	371.256	50.6	662.471	50.5	1100.55
50.5	128.829	50.6	223.284	50.6	371.638	50.7	663.063	50.6	1101.31
50.6	128.977	50.7	223.527	50.7	372.025	50.8	663.652	50.7	1102.07
50.7	129.127	50.8	223.774	50.8	372.42	50.9	664.254	50.8	1102.83
50.8	129.278	50.9	224.017	50.9	372.808	51	664.853	50.9	1103.6
50.9	129.428	51	224.266	51	373.189	51.1	665.452	51	1104.37
51	129.578	51.1	224.504	51.1	373.569	51.2	666.06	51.1	1105.13
51.1	129.722	51.2	224.743	51.2	373.96	51.3	666.656	51.2	1105.89
51.2	129.87	51.3	224.987	51.3	374.338	51.4	667.25	51.3	1106.65
51.3	130.021	51.4	225.23	51.4	374.713	51.5	667.845	51.4	1107.41
51.4	130.174	51.5	225.466	51.5	375.093	51.6	668.437	51.5	1108.16
51.5	130.327	51.6	225.704	51.6	375.461	51.7	669.042	51.6	1108.9
51.6	130.473	51.7	225.949	51.7	375.835	51.8	669.658	51.7	1109.65
51.7	130.623	51.8	226.193	51.8	376.2	51.9	670.268	51.8	1110.4
51.8	130.77	51.9	226.428	51.9	376.569	52	670.871	51.9	1111.14
51.9	130.918	52	226.666	52	376.947	52.1	671.476	52	1111.88
52	131.054	52.1	226.907	52.1	377.328	52.2	672.081	52.1	1112.62
52.1	131.199	52.2	227.148	52.2	377.707	52.3	672.675	52.2	1113.35
52.2	131.342	52.3	227.383	52.3	378.08	52.4	673.28	52.3	1114.09
52.3	131.486	52.4	227.619	52.4	378.459	52.5	673.886	52.4	1114.82
52.4	131.629	52.5	227.861	52.5	378.841	52.6	674.485	52.5	1115.55
52.5	131.777	52.6	228.111	52.6	379.221	52.7	675.077	52.6	1116.3
52.6	131.933	52.7	228.356	52.7	379.616	52.8	675.668	52.7	1117.04
52.7	132.077	52.8	228.591	52.8	380.005	52.9	676.252	52.8	1117.78
52.8	132.219	52.9	228.825	52.9	380.396	53	676.838	52.9	1118.52
52.9	132.364	53	229.061	53	380.781	53.1	677.426	53	1119.25
53	132.505	53.1	229.296	53.1	381.152	53.2	678.009	53.1	1119.98
53.1	132.648	53.2	229.533	53.2	381.52	53.3	678.6	53.2	1120.71
53.2	132.791	53.3	229.784	53.3	381.895	53.4	679.197	53.3	1121.45
53.3	132.932	53.4	230.029	53.4	382.266	53.5	679.787	53.4	1122.18
53.4	133.07	53.5	230.266	53.5	382.639	53.6	680.376	53.5	1122.91
53.5	133.211	53.6	230.492	53.6	383.019	53.7	680.964	53.6	1123.65
53.6	133.352	53.7	230.717	53.7	383.395	53.8	681.544	53.7	1124.38
53.7	133.496	53.8	230.95	53.8	383.766	53.9	682.118	53.8	1125.1
53.8	133.646	53.9	231.185	53.9	384.132	54	682.7	53.9	1125.82
53.9	133.787	54	231.422	54	384.499	54.1	683.27	54	1126.53
54	133.93	54.1	231.659	54.1	384.862	54.2	683.838	54.1	1127.25
54.1	134.074	54.2	231.9	54.2	385.234	54.3	684.415	54.2	1127.97
54.2	134.214	54.3	232.136	54.3	385.609	54.4	684.986	54.3	1128.7
54.3	134.357	54.4	232.363	54.4	385.972	54.5	685.554	54.4	1129.41
54.4	134.497	54.5	232.601	54.5	386.338	54.6	686.123	54.5	1130.11
54.5	134.632	54.6	232.843	54.6	386.709	54.7	686.684	54.6	1130.83
54.6	134.775	54.7	233.085	54.7	387.073	54.8	687.251	54.7	1131.53
54.7	134.916	54.8	233.332	54.8	387.426	54.9	687.839	54.8	1132.24
54.8	135.049	54.9	233.571	54.9	387.782	55	688.42	54.9	1132.96
54.9	135.193	55	233.8	55	388.143	55.1	688.989	55	1133.68
55	135.332	55.1	234.038	55.1	388.508	55.2	689.555	55.1	1134.38
55.1	135.473	55.2	234.276	55.2	388.866	55.3	690.132	55.2	1135.09
55.2	135.608	55.3	234.502	55.3	389.224	55.4	690.709	55.3	1135.79
55.3	135.747	55.4	234.734	55.4	389.582	55.5	691.271	55.4	1136.5
55.4	135.888	55.5	234.969	55.5	389.942	55.6	691.828	55.5	1137.2
55.5	136.018	55.6	235.195	55.6	390.303	55.7	692.39	55.6	1137.91
55.6	136.156	55.7	235.425	55.7	390.66	55.8	692.954	55.7	1138.62
55.7	136.29	55.8	235.652	55.8	391.013	55.9	693.517	55.8	1139.33
55.8	136.422	55.9	235.879	55.9	391.374	56	694.075	55.9	1140.04
55.9	136.555	56	236.119	56	391.745	56.1	694.632	56	1140.75
56	136.686	56.1	236.356	56.1	392.101	56.2	695.192	56.1	1141.46
56.1	136.824	56.2	236.589	56.2	392.448	56.3	695.758	56.2	1142.17
56.2	136.964	56.3	236.818	56.3	392.808	56.4	696.316	56.3	1142.87
56.3	137.103	56.4	237.052	56.4	393.18	56.5	696.87	56.4	1143.56
56.4	137.242	56.5	237.281	56.5	393.543	56.6	697.431	56.5	1144.27
56.5	137.388	56.6	237.507	56.6	393.902	56.7	697.996	56.6	1144.98
56.6	137.531	56.7	237.746	56.7	394.265	56.8	698.556	56.7	1145.67
56.7	137.673	56.8	237.989	56.8	394.63	56.9	699.105	56.8	1146.35
56.8	137.817	56.9	238.227	56.9	395	57	699.654	56.9	1147.03
56.9	137.957	57	238.457	57	395.364	57.1	700.201	57	1147.72
57	138.092	57.1	238.686	57.1	395.724	57.2	700.762	57.1	1148.4
57.1	138.221	57.2	238.912	57.2	396.102	57.3	701.31	57.2	1149.08
57.2	138.362	57.3	239.139	57.3	396.47	57.4	701.86	57.3	1149.77
57.3	138.501	57.4	239.365	57.4	396.834	57.5	702.406	57.4	1150.46
57.4	138.642	57.5	239.589	57.5	397.186	57.6	702.953	57.5	1151.14
57.5	138.793	57.6	239.813	57.6	397.542	57.7	703.503	57.6	1151.81
57.6	138.941	57.7	240.047	57.7	397.896	57.8	704.052	57.7	1152.49
57.7	139.085	57.8	240.268	57.8	398.251	57.9	704.596	57.8	1153.17
57.8	139.223	57.9	240.481	57.9	398.601	58	705.149	57.9	1153.87
57.9	139.364	58	240.705	58	398.954	58.1	705.699	58	1154.57
58	139.498	58.1	240.933	58.1	399.304	58.2	706.256	58.1	1155.26
58.1	139.636	58.2	241.167	58.2	399.663	58.3	706.802	58.2	1155.95
58.2	139.778	58.3	241.39	58.3	400.003	58.4	707.342	58.3	1156.63
58.3	139.914	58.4	241.616	58.4	400.349	58.5	707.892	58.4	1157.3
58.4	140.053	58.5	241.845	58.5	400.692	58.6	708.448	58.5	1157.97
58.5	140.19	58.6	242.095	58.6	401.049	58.7	708.99	58.6	1158.66
58.6	140.32	58.7	242.345	58.7	401.409	58.8	709.547	58.7	1159.35
58.7	140.451	58.8	242.578	58.8	401.778	58.9	710.103	58.8	1160.03
58.8	140.577	58.9	242.811	58.9	402.143	59	710.642	58.9	1160.7
58.9	140.703	59	243.044	59	402.499	59.1	711.179	59	1161.36
59	140.841	59.1	243.051	59.1	402.847	59.2	711.196	59.1	1162.03
59.1	140.849	59.2	243.044	59.2	402.507	59.3	711.196	59.2	1162.7
59.2	140.841	59.3	243.044	59.3	402.507	59.4	711.245	59.3	1163.38
59.3	140.841	59.4	243.051	59.4	402.847	59.5	711.669	59.4	1163.41
59.4	140.849	59.5	243.044	59.5	402.847	59.6	711.715	59.5	1163.67
59.5	140.841	59.6	242.814	59.6	402.507	59.7	711.738	59.6	1164.06
59.6	140.706	59.7	242.811	59.7	402.499	59.8	711.738	59.7	1164.07
59.7	140.703	59.8	242.58	59.8	402.416	59.9	711.715	59.8	1164.06
59.8	140.579	59.9	242.578	59.9	402.416	60	711.669	59.9	1163.67
59.9	140.577	60	242.439	60	402.368	60.1	711.669	60	1163.41
60	140.458	60.1	242.439	60.1	402.368	60.2	711.669	60.1	1163.41
60.1	140.458	60.2	242.439	60.2	402.368	60.3	711.669	60.2	1163.41
60.2	140.458	60.3	242.439	60.3	402.368	60.4	711.669	60.3	1163.41
60.3	140.458	60.4	242.323	60.4	402.368	60.5	711.669	60.4	1163.41
60.4	139.214	60.5	241.518	60.5	402.368	60.6	711.669	60.5	1163.41
60.5	139.103	60.6	241.484	60.6	402.352	60.7	711.669	60.6	1163.41
60.6	139.055	60.7	241.341	60.7	402.343	60.8	711.499	60.7	1163.41
60.7	138.998	60.8	241.211	60.8	402.318	60.9	711.245	60.8	1163.41
60.8	138.964	60.9	241.14	60.9	402.296	61	711.196	60.9	1163.41
60.9	138.857	61	241.065	61	402.15	61.1	711.157	61	1163.16
61	138.701	61.1	241.03	61.1	402.147	61.2	710.627	61.1	1161.74
61.1	138.613	61.2	240.966	61.2	402.111	61.3	709.503	61.2	1159.85
61.2	138.603	61.3	240.951	61.3	402.111	61.4	708.659	61.3	1157.56
61.3	138.579	61.4	240.93	61.4	401.987	61.5	707.138	61.4	1155.28
61.4	138.527	61.5	240.888	61.5	401.666	61.6	705.879	61.5	1152.8
61.5	138.465	61.6	240.706	61.6	401.04	61.7	704.101	61.6	1150.06
61.6	138.423	61.7	240.133	61.7	400.102	61.8	702.633	61.7	1147.35
61.7	138.387	61.8	239.304	61.8	399	61.9	701.077	61.8	1144.55
61.8	138.2	61.9	238.666	61.9	398.121	62	699.805	61.9	1141.8
61.9	137.728	62	238.053	62	397.479	62.1	698.307	62	1139.4
62	137.386	62.1	237.645	62.1	396.853	62.2	697.021	62.1	1136.88
62.1	137.094	62.2	236.991	62.2	396.083	62.3	695.655	62.2	1134.46
62.2	136.829	62.3	236.416	62.3	395.378	62.4	694.517	62.3	1132.27
62.3	136.517	62.4	235.951	62.4	394.676	62.5	693.321	62.4	1130.13
62.4	136.167	62.5	235.473	62.5	393.98	62.6	692.078	62.5	1127.91
62.5	135.829	62.6	234.972	62.6	393.271	62.7	690.914	62.6	1125.8
62.6	135.461	62.7	234.576	62.7	392.775	62.8	689.757	62.7	1123.65
62.7	135.177	62.8	234.09	62.8	392.146	62.9	688.668	62.8	1121.67
62.8	134.885	62.9	233.613	62.9	391.44	63	687.632	62.9	1119.65
62.9	134.502	63	233.076	63	390.79	63.1	686.536	63	1117.78
63	134.183	63.1	232.535	63.1	390.077	63.2	685.413	63.1	1115.79
63.1	133.859	63.2	232.121	63.2	389.456	63.3	684.431	63.2	1113.87
63.2	133.586	63.3	231.72	63.3	388.869	63.4	683.361	63.3	1111.91
63.3	133.306	63.4	231.333	63.4	388.231	63.5	682.451	63.4	1110.05
63.4	133.017	63.5	230.906	63.5	387.734	63.6	681.496	63.5	1108.36
63.5	132.753	63.6	230.471	63.6	387.164	63.7	680.606	63.6	1106.57
63.6	132.467	63.7	230.058	63.7	386.62	63.8	679.657	63.7	1104.9
63.7	132.203	63.8	229.644	63.8	386.051	63.9	678.759	63.8	1103.18
63.8	131.938	63.9	229.236	63.9	385.537	64	677.876	63.9	1101.57
63.9	131.682	64	228.837	64	384.989	64.1	676.989	64	1099.91
64	131.422	64.1	228.461	64.1	384.467	64.2	676.089	64.1	1098.28
64.1	131.176	64.2	228.043	64.2	383.935	64.3	675.215	64.2	1096.67
64.2	130.93	64.3	227.646	64.3	383.441	64.4	674.384	64.3	1095.14
64.3	130.669	64.4	227.283	64.4	382.933	64.5	673.56	64.4	1093.55
64.4	130.427	64.5	226.931	64.5	382.431	64.6	672.741	64.5	1092.07
64.5	130.202	64.6	226.586	64.6	381.947	64.7	671.946	64.6	1090.54
64.6	129.979	64.7	226.25	64.7	381.478	64.8	671.165	64.7	1089.09
64.7	129.757	64.8	225.902	64.8	381.006	64.9	670.394	64.8	1087.62
64.8	129.541	64.9	225.558	64.9	380.544	65	669.636	64.9	1086.14
64.9	129.318	65	225.213	65	380.077	65.1	668.893	65	1084.75
65	129.093	65.1	224.875	65.1	379.618	65.2	668.153	65.1	1083.4
65.1	128.886	65.2	224.552	65.2	379.173	65.3	667.432	65.2	1082.01
65.2	128.668	65.3	224.238	65.3	378.739	65.4	666.719	65.3	1080.65
65.3	128.46	65.4	223.919	65.4	378.312	65.5	665.995	65.4	1079.3
65.4	128.254	65.5	223.575	65.5	377.89	65.6	665.297	65.5	1077.96
65.5	128.029	65.6	223.234	65.6	377.474	65.7	664.619	65.6	1076.64
65.6	127.815	65.7	222.918	65.7	377.051	65.8	663.929	65.7	1075.34
65.7	127.601	65.8	222.596	65.8	376.634	65.9	663.248	65.8	1074.05
65.8	127.396	65.9	222.288	65.9	376.232	66	662.586	65.9	1072.8
65.9	127.204	66	221.985	66	375.827	66.1	661.928	66	1071.57
66	127.007	66.1	221.691	66.1	375.421	66.2	661.266	66.1	1070.33
66.1	126.811	66.2	221.409	66.2	375.018	66.3	660.617	66.2	1069.12
66.2	126.615	66.3	221.129	66.3	374.629	66.4	659.972	66.3	1067.94
66.3	126.43	66.4	220.836	66.4	374.238	66.5	659.343	66.4	1066.76
66.4	126.24	66.5	220.555	66.5	373.848	66.6	658.708	66.5	1065.61
66.5	126.056	66.6	220.276	66.6	373.452	66.7	658.084	66.6	1064.46
66.6	125.861	66.7	220	66.7	373.057	66.8	657.455	66.7	1063.32
66.7	125.676	66.8	219.703	66.8	372.66	66.9	656.851	66.8	1062.22
66.8	125.476	66.9	219.421	66.9	372.265	67	656.268	66.9	1061.12
66.9	125.283	67	219.162	67	371.881	67.1	655.695	67	1060.04
67	125.109	67.1	218.891	67.1	371.511	67.2	655.135	67.1	1058.96
67.1	124.954	67.2	218.631	67.2	371.149	67.3	654.576	67.2	1057.9
67.2	124.799	67.3	218.373	67.3	370.793	67.4	654.026	67.3	1056.86
67.3	124.645	67.4	218.106	67.4	370.425	67.5	653.479	67.4	1055.83
67.4	124.481	67.5	217.852	67.5	370.066	67.6	652.907	67.5	1054.83
67.5	124.325	67.6	217.582	67.6	369.698	67.7	652.366	67.6	1053.8
67.6	124.157	67.7	217.343	67.7	369.363	67.8	651.83	67.7	1052.81
67.7	124.014	67.8	217.103	67.8	369.022	67.9	651.294	67.8	1051.83
67.8	123.861	67.9	216.856	67.9	368.681	68	650.758	67.9	1050.85
67.9	123.721	68	216.605	68	368.348	68.1	650.238	68	1049.88
68	123.566	68.1	216.378	68.1	368.023	68.2	649.699	68.1	1048.92
68.1	123.421	68.2	216.136	68.2	367.685	68.3	649.154	68.2	1047.97
68.2	123.266	68.3	215.89	68.3	367.342	68.4	648.625	68.3	1047.02
68.3	123.101	68.4	215.644	68.4	366.994	68.5	648.111	68.4	1046.07
68.4	122.93	68.5	215.399	68.5	366.675	68.6	647.586	68.5	1045.14
68.5	122.776	68.6	215.14	68.6	366.347	68.7	647.082	68.6	1044.21
68.6	122.614	68.7	214.907	68.7	366.022	68.8	646.582	68.7	1043.31
68.7	122.466	68.8	214.675	68.8	365.701	68.9	646.081	68.8	1042.42
68.8	122.323	68.9	214.435	68.9	365.384	69	645.587	68.9	1041.53
68.9	122.175	69	214.197	69	365.079	69.1	645.088	69	1040.65
69	122.037	69.1	213.977	69.1	364.766	69.2	644.595	69.1	1039.79
69.1	121.898	69.2	213.761	69.2	364.451	69.3	644.098	69.2	1038.94
69.2	121.752	69.3	213.53	69.3	364.14	69.4	643.615	69.3	1038.1
69.3	121.613	69.4	213.31	69.4	363.829	69.5	643.137	69.4	1037.27
69.4	121.485	69.5	213.098	69.5	363.522	69.6	642.665	69.5	1036.45
69.5	121.354	69.6	212.884	69.6	363.212	69.7	642.188	69.6	1035.64
69.6	121.217	69.7	212.652	69.7	362.91	69.8	641.729	69.7	1034.83
69.7	121.07	69.8	212.435	69.8	362.611	69.9	641.263	69.8	1034.02
69.8	120.926	69.9	212.222	69.9	362.318	70	640.802	69.9	1033.22
69.9	120.791	70	212.021	70	362.025	70.1	640.353	70	1032.44
70	120.658	70.1	211.817	70.1	361.725	70.2	639.908	70.1	1031.66
70.1	120.526	70.2	211.611	70.2	361.435	70.3	639.46	70.2	1030.89
70.2	120.395	70.3	211.413	70.3	361.154	70.4	639.018	70.3	1030.13
70.3	120.267	70.4	211.206	70.4	360.866	70.5	638.586	70.4	1029.36
70.4	120.13	70.5	211.005	70.5	360.576	70.6	638.136	70.5	1028.6
70.5	120.002	70.6	210.799	70.6	360.295	70.7	637.675	70.6	1027.84
70.6	119.867	70.7	210.585	70.7	360.003	70.8	637.229	70.7	1027.08
70.7	119.729	70.8	210.391	70.8	359.708	70.9	636.779	70.8	1026.34
70.8	119.603	70.9	210.19	70.9	359.424	71	636.348	70.9	1025.6
70.9	119.47	71	209.99	71	359.144	71.1	635.926	71	1024.87
71	119.347	71.1	209.779	71.1	358.861	71.2	635.49	71.1	1024.14
71.1	119.216	71.2	209.583	71.2	358.58	71.3	635.059	71.2	1023.42
71.2	119.092	71.3	209.393	71.3	358.31	71.4	634.637	71.3	1022.72
71.3	118.968	71.4	209.197	71.4	358.047	71.5	634.217	71.4	1022.02
71.4	118.841	71.5	209.003	71.5	357.786	71.6	633.779	71.5	1021.33
71.5	118.715	71.6	208.809	71.6	357.517	71.7	633.348	71.6	1020.64
71.6	118.588	71.7	208.619	71.7	357.248	71.8	632.936	71.7	1019.95
71.7	118.464	71.8	208.434	71.8	356.983	71.9	632.523	71.8	1019.27
71.8	118.339	71.9	208.246	71.9	356.728	72	632.11	71.9	1018.58
71.9	118.219	72	208.057	72	356.466	72.1	631.691	72	1017.93
72	118.101	72.1	207.873	72.1	356.207	72.2	631.271	72.1	1017.28
72.1	117.986	72.2	207.689	72.2	355.95	72.3	630.856	72.2	1016.62
72.2	117.878	72.3	207.5	72.3	355.684	72.4	630.445	72.3	1015.96
72.3	117.761	72.4	207.315	72.4	355.419	72.5	630.036	72.4	1015.3
72.4	117.64	72.5	207.141	72.5	355.161	72.6	629.629	72.5	1014.65
72.5	117.52	72.6	206.963	72.6	354.902	72.7	629.241	72.6	1014
72.6	117.414	72.7	206.78	72.7	354.646	72.8	628.855	72.7	1013.37
72.7	117.302	72.8	206.6	72.8	354.399	72.9	628.464	72.8	1012.74
72.8	117.195	72.9	206.433	72.9	354.154	73	628.072	72.9	1012.12
72.9	117.091	73	206.263	73	353.901	73.1	627.682	73	1011.5
73	116.982	73.1	206.095	73.1	353.654	73.2	627.294	73.1	1010.88
73.1	116.87	73.2	205.92	73.2	353.399	73.3	626.916	73.2	1010.26
73.2	116.766	73.3	205.757	73.3	353.158	73.4	626.543	73.3	1009.65
73.3	116.661	73.4	205.592	73.4	352.929	73.5	626.162	73.4	1009.05
73.4	116.558	73.5	205.421	73.5	352.687	73.6	625.792	73.5	1008.44
73.5	116.449	73.6	205.256	73.6	352.452	73.7	625.42	73.6	1007.85
73.6	116.341	73.7	205.087	73.7	352.216	73.8	625.044	73.7	1007.26
73.7	116.231	73.8	204.922	73.8	351.985	73.9	624.667	73.8	1006.66
73.8	116.12	73.9	204.76	73.9	351.745	74	624.296	73.9	1006.07
73.9	116.017	74	204.589	74	351.495	74.1	623.926	74	1005.5
74	115.913	74.1	204.426	74.1	351.256	74.2	623.558	74.1	1004.93
74.1	115.81	74.2	204.267	74.2	351.02	74.3	623.196	74.2	1004.37
74.2	115.703	74.3	204.105	74.3	350.791	74.4	622.826	74.3	1003.8
74.3	115.598	74.4	203.938	74.4	350.557	74.5	622.454	74.4	1003.22
74.4	115.49	74.5	203.778	74.5	350.317	74.6	622.081	74.5	1002.66
74.5	115.392	74.6	203.607	74.6	350.075	74.7	621.726	74.6	1002.09
74.6	115.285	74.7	203.449	74.7	349.835	74.8	621.362	74.7	1001.53
74.7	115.185	74.8	203.285	74.8	349.593	74.9	620.989	74.8	1000.97
74.8	115.081	74.9	203.118	74.9	349.347	75	620.626	74.9	1000.41
74.9	114.975	75	202.959	75	349.121	75.1	620.269	75	999.869
75	114.876	75.1	202.8	75.1	348.906	75.2	619.919	75.1	999.318
75.1	114.778	75.2	202.644	75.2	348.692	75.3	619.563	75.2	998.778
75.2	114.691	75.3	202.486	75.3	348.465	75.4	619.206	75.3	998.238
75.3	114.591	75.4	202.327	75.4	348.246	75.5	618.853	75.4	997.708
75.4	114.495	75.5	202.171	75.5	348.029	75.6	618.503	75.5	997.177
75.5	114.402	75.6	202.018	75.6	347.808	75.7	618.156	75.6	996.649
75.6	114.303	75.7	201.863	75.7	347.591	75.8	617.808	75.7	996.117
75.7	114.207	75.8	201.712	75.8	347.373	75.9	617.458	75.8	995.588
75.8	114.114	75.9	201.56	75.9	347.156	76	617.114	75.9	995.071
75.9	114.02	76	201.408	76	346.936	76.1	616.78	76	994.553
76	113.924	76.1	201.263	76.1	346.726	76.2	616.438	76.1	994.035
76.1	113.833	76.2	201.122	76.2	346.508	76.3	616.094	76.2	993.513
76.2	113.741	76.3	200.982	76.3	346.291	76.4	615.748	76.3	992.988
76.3	113.651	76.4	200.836	76.4	346.074	76.5	615.409	76.4	992.459
76.4	113.559	76.5	200.69	76.5	345.867	76.6	615.071	76.5	991.949
76.5	113.472	76.6	200.546	76.6	345.656	76.7	614.73	76.6	991.439
76.6	113.38	76.7	200.407	76.7	345.448	76.8	614.381	76.7	990.921
76.7	113.289	76.8	200.268	76.8	345.239	76.9	614.044	76.8	990.415
76.8	113.199	76.9	200.132	76.9	345.03	77	613.71	76.9	989.925
76.9	113.114	77	199.986	77	344.814	77.1	613.373	77	989.424
77	113.024	77.1	199.838	77.1	344.604	77.2	613.031	77.1	988.915
77.1	112.931	77.2	199.696	77.2	344.397	77.3	612.694	77.2	988.413
77.2	112.839	77.3	199.56	77.3	344.194	77.4	612.364	77.3	987.927
77.3	112.751	77.4	199.422	77.4	343.988	77.5	612.027	77.4	987.445
77.4	112.663	77.5	199.281	77.5	343.785	77.6	611.696	77.5	986.961
77.5	112.581	77.6	199.143	77.6	343.587	77.7	611.374	77.6	986.472
77.6	112.5	77.7	199.005	77.7	343.381	77.8	611.054	77.7	985.989
77.7	112.418	77.8	198.863	77.8	343.171	77.9	610.734	77.8	985.511
77.8	112.335	77.9	198.725	77.9	342.967	78	610.413	77.9	985.024
77.9	112.247	78	198.585	78	342.761	78.1	610.086	78	984.537
78	112.162	78.1	198.446	78.1	342.552	78.2	609.767	78.1	984.048
78.1	112.078	78.2	198.307	78.2	342.356	78.3	609.456	78.2	983.571
78.2	112	78.3	198.169	78.3	342.165	78.4	609.14	78.3	983.092
78.3	111.917	78.4	198.035	78.4	341.971	78.5	608.816	78.4	982.611
78.4	111.832	78.5	197.9	78.5	341.778	78.6	608.512	78.5	982.134
78.5	111.752	78.6	197.762	78.6	341.582	78.7	608.211	78.6	981.66
78.6	111.669	78.7	197.623	78.7	341.384	78.8	607.887	78.7	981.184
78.7	111.586	78.8	197.48	78.8	341.183	78.9	607.574	78.8	980.716
78.8	111.501	78.9	197.343	78.9	340.995	79	607.283	78.9	980.253
78.9	111.418	79	197.208	79	340.807	79.1	606.984	79	979.797
79	111.341	79.1	197.071	79.1	340.614	79.2	606.674	79.1	979.345
79.1	111.259	79.2	196.935	79.2	340.42	79.3	606.364	79.2	978.895
79.2	111.181	79.3	196.801	79.3	340.222	79.4	606.07	79.3	978.436
79.3	111.097	79.4	196.663	79.4	340.025	79.5	605.776	79.4	977.968
79.4	111.015	79.5	196.532	79.5	339.832	79.6	605.478	79.5	977.519
79.5	110.936	79.6	196.402	79.6	339.643	79.7	605.174	79.6	977.072
79.6	110.856	79.7	196.269	79.7	339.457	79.8	604.875	79.7	976.629
79.7	110.777	79.8	196.14	79.8	339.272	79.9	604.579	79.8	976.195
79.8	110.703	79.9	196.016	79.9	339.083	80	604.277	79.9	975.744
79.9	110.623	80	195.888	80	338.896	80.1	603.959	80	975.293
80	110.544	80.1	195.766	80.1	338.713	80.2	603.647	80.1	974.866
80.1	110.469	80.2	195.641	80.2	338.533	80.3	603.34	80.2	974.425
80.2	110.392	80.3	195.513	80.3	338.342	80.4	603.041	80.3	973.98
80.3	110.312	80.4	195.387	80.4	338.145	80.5	602.723	80.4	973.554
80.4	110.236	80.5	195.261	80.5	337.943	80.6	602.414	80.5	973.133
80.5	110.161	80.6	195.139	80.6	337.755	80.7	602.121	80.6	972.706
80.6	110.09	80.7	195.017	80.7	337.571	80.8	601.817	80.7	972.269
80.7	110.017	80.8	194.888	80.8	337.392	80.9	601.501	80.8	971.838
80.8	109.94	80.9	194.764	80.9	337.212	81	601.185	80.9	971.412
80.9	109.862	81	194.641	81	337.037	81.1	600.874	81	970.985
81	109.789	81.1	194.525	81.1	336.856	81.2	600.583	81.1	970.563
81.1	109.713	81.2	194.41	81.2	336.678	81.3	600.284	81.2	970.136
81.2	109.641	81.3	194.296	81.3	336.494	81.4	599.985	81.3	969.722
81.3	109.569	81.4	194.178	81.4	336.318	81.5	599.692	81.4	969.312
81.4	109.498	81.5	194.063	81.5	336.136	81.6	599.398	81.5	968.89
81.5	109.427	81.6	193.944	81.6	335.948	81.7	599.114	81.6	968.47
81.6	109.353	81.7	193.821	81.7	335.772	81.8	598.823	81.7	968.056
81.7	109.286	81.8	193.707	81.8	335.597	81.9	598.533	81.8	967.643
81.8	109.219	81.9	193.588	81.9	335.432	82	598.262	81.9	967.232
81.9	109.145	82	193.473	82	335.263	82.1	597.985	82	966.819
82	109.074	82.1	193.355	82.1	335.097	82.2	597.703	82.1	966.405
82.1	109.003	82.2	193.235	82.2	334.927	82.3	597.42	82.2	966.001
82.2	108.929	82.3	193.119	82.3	334.766	82.4	597.134	82.3	965.6
82.3	108.862	82.4	193	82.4	334.595	82.5	596.849	82.4	965.182
82.4	108.789	82.5	192.889	82.5	334.422	82.6	596.561	82.5	964.773
82.5	108.721	82.6	192.773	82.6	334.247	82.7	596.274	82.6	964.369
82.6	108.644	82.7	192.654	82.7	334.075	82.8	595.986	82.7	963.958
82.7	108.57	82.8	192.537	82.8	333.901	82.9	595.711	82.8	963.545
82.8	108.497	82.9	192.422	82.9	333.73	83	595.427	82.9	963.133
82.9	108.426	83	192.301	83	333.561	83.1	595.141	83	962.717
83	108.352	83.1	192.189	83.1	333.387	83.2	594.865	83.1	962.317
83.1	108.289	83.2	192.08	83.2	333.222	83.3	594.589	83.2	961.921
83.2	108.228	83.3	191.971	83.3	333.056	83.4	594.315	83.3	961.512
83.3	108.162	83.4	191.861	83.4	332.887	83.5	594.049	83.4	961.106
83.4	108.095	83.5	191.749	83.5	332.72	83.6	593.786	83.5	960.71
83.5	108.031	83.6	191.636	83.6	332.548	83.7	593.509	83.6	960.314
83.6	107.968	83.7	191.525	83.7	332.373	83.8	593.253	83.7	959.91
83.7	107.9	83.8	191.416	83.8	332.213	83.9	592.994	83.8	959.515
83.8	107.833	83.9	191.31	83.9	332.051	84	592.714	83.9	959.132
83.9	107.766	84	191.194	84	331.881	84.1	592.447	84	958.75
84	107.696	84.1	191.083	84.1	331.714	84.2	592.178	84.1	958.363
84.1	107.63	84.2	190.972	84.2	331.548	84.3	591.905	84.2	957.969
84.2	107.566	84.3	190.861	84.3	331.377	84.4	591.636	84.3	957.58
84.3	107.495	84.4	190.755	84.4	331.209	84.5	591.363	84.4	957.196
84.4	107.425	84.5	190.651	84.5	331.042	84.6	591.091	84.5	956.81
84.5	107.361	84.6	190.537	84.6	330.875	84.7	590.825	84.6	956.421
84.6	107.295	84.7	190.43	84.7	330.715	84.8	590.561	84.7	956.032
84.7	107.229	84.8	190.324	84.8	330.547	84.9	590.291	84.8	955.64
84.8	107.158	84.9	190.221	84.9	330.386	85	590.019	84.9	955.262
84.9	107.097	85	190.12	85	330.228	85.1	589.758	85	954.889
85	107.035	85.1	190.016	85.1	330.068	85.2	589.486	85.1	954.507
85.1	106.971	85.2	189.913	85.2	329.908	85.3	589.216	85.2	954.121
85.2	106.906	85.3	189.807	85.3	329.749	85.4	588.951	85.3	953.74
85.3	106.839	85.4	189.71	85.4	329.587	85.5	588.683	85.4	953.365
85.4	106.779	85.5	189.608	85.5	329.43	85.6	588.431	85.5	952.989
85.5	106.726	85.6	189.504	85.6	329.278	85.7	588.17	85.6	952.61
85.6	106.665	85.7	189.403	85.7	329.124	85.8	587.909	85.7	952.23
85.7	106.603	85.8	189.301	85.8	328.966	85.9	587.644	85.8	951.846
85.8	106.543	85.9	189.194	85.9	328.806	86	587.38	85.9	951.476
85.9	106.484	86	189.091	86	328.652	86.1	587.114	86	951.113
86	106.427	86.1	188.988	86.1	328.495	86.2	586.855	86.1	950.742
86.1	106.367	86.2	188.88	86.2	328.337	86.3	586.607	86.2	950.372
86.2	106.304	86.3	188.779	86.3	328.182	86.4	586.362	86.3	950.013
86.3	106.243	86.4	188.68	86.4	328.034	86.5	586.116	86.4	949.644
86.4	106.186	86.5	188.578	86.5	327.882	86.6	585.865	86.5	949.27
86.5	106.124	86.6	188.476	86.6	327.732	86.7	585.61	86.6	948.897
86.6	106.063	86.7	188.369	86.7	327.574	86.8	585.36	86.7	948.526
86.7	105.997	86.8	188.269	86.8	327.419	86.9	585.103	86.8	948.16
86.8	105.933	86.9	188.172	86.9	327.265	87	584.854	86.9	947.806
86.9	105.872	87	188.074	87	327.113	87.1	584.624	87	947.442
87	105.81	87.1	187.982	87.1	326.966	87.2	584.385	87.1	947.079
87.1	105.753	87.2	187.884	87.2	326.821	87.3	584.136	87.2	946.712
87.2	105.694	87.3	187.787	87.3	326.676	87.4	583.882	87.3	946.338
87.3	105.636	87.4	187.69	87.4	326.527	87.5	583.629	87.4	945.966
87.4	105.573	87.5	187.594	87.5	326.382	87.6	583.37	87.5	945.606
87.5	105.515	87.6	187.495	87.6	326.235	87.7	583.12	87.6	945.254
87.6	105.459	87.7	187.396	87.7	326.092	87.8	582.868	87.7	944.902
87.7	105.4	87.8	187.294	87.8	325.943	87.9	582.612	87.8	944.553
87.8	105.337	87.9	187.193	87.9	325.793	88	582.372	87.9	944.204
87.9	105.272	88	187.099	88	325.649	88.1	582.135	88	943.849
88	105.214	88.1	187	88.1	325.501	88.2	581.894	88.1	943.504
88.1	105.152	88.2	186.901	88.2	325.359	88.3	581.652	88.2	943.156
88.2	105.094	88.3	186.806	88.3	325.218	88.4	581.403	88.3	942.812
88.3	105.04	88.4	186.703	88.4	325.072	88.5	581.166	88.4	942.466
88.4	104.981	88.5	186.605	88.5	324.929	88.6	580.933	88.5	942.128
88.5	104.921	88.6	186.506	88.6	324.783	88.7	580.694	88.6	941.784
88.6	104.859	88.7	186.408	88.7	324.636	88.8	580.444	88.7	941.432
88.7	104.801	88.8	186.314	88.8	324.486	88.9	580.202	88.8	941.089
88.8	104.747	88.9	186.222	88.9	324.344	89	579.956	88.9	940.739
88.9	104.694	89	186.126	89	324.204	89.1	579.71	89	940.389
89	104.635	89.1	186.035	89.1	324.053	89.2	579.46	89.1	940.041
89.1	104.578	89.2	185.94	89.2	323.909	89.3	579.211	89.2	939.692
89.2	104.519	89.3	185.846	89.3	323.763	89.4	578.968	89.3	939.348
89.3	104.464	89.4	185.753	89.4	323.616	89.5	578.729	89.4	939.004
89.4	104.407	89.5	185.663	89.5	323.473	89.6	578.487	89.5	938.662
89.5	104.354	89.6	185.57	89.6	323.33	89.7	578.233	89.6	938.322
89.6	104.3	89.7	185.48	89.7	323.183	89.8	577.995	89.7	937.979
89.7	104.239	89.8	185.386	89.8	323.036	89.9	577.759	89.8	937.646
89.8	104.184	89.9	185.294	89.9	322.889	90	577.522	89.9	937.31
89.9	104.129	90	185.206	90	322.745	90.1	577.291	90	936.973
90	104.074	90.1	185.119	90.1	322.607	90.2	577.06	90.1	936.649
90.1	104.019	90.2	185.028	90.2	322.471	90.3	576.83	90.2	936.321
90.2	103.965	90.3	184.942	90.3	322.335	90.4	576.607	90.3	935.987
90.3	103.912	90.4	184.848	90.4	322.195	90.5	576.382	90.4	935.656
90.4	103.86	90.5	184.754	90.5	322.055	90.6	576.149	90.5	935.322
90.5	103.806	90.6	184.661	90.6	321.921	90.7	575.915	90.6	934.986
90.6	103.754	90.7	184.569	90.7	321.787	90.8	575.687	90.7	934.652
90.7	103.698	90.8	184.479	90.8	321.653	90.9	575.457	90.8	934.317
90.8	103.645	90.9	184.389	90.9	321.518	91	575.226	90.9	933.976
90.9	103.594	91	184.301	91	321.374	91.1	575.003	91	933.633
91	103.536	91.1	184.209	91.1	321.231	91.2	574.782	91.1	933.303
91.1	103.481	91.2	184.121	91.2	321.095	91.3	574.554	91.2	932.969
91.2	103.432	91.3	184.031	91.3	320.957	91.4	574.331	91.3	932.631
91.3	103.382	91.4	183.944	91.4	320.81	91.5	574.101	91.4	932.302
91.4	103.326	91.5	183.86	91.5	320.674	91.6	573.866	91.5	931.984
91.5	103.275	91.6	183.774	91.6	320.541	91.7	573.64	91.6	931.665
91.6	103.22	91.7	183.688	91.7	320.409	91.8	573.417	91.7	931.348
91.7	103.171	91.8	183.595	91.8	320.274	91.9	573.19	91.8	931.03
91.8	103.12	91.9	183.507	91.9	320.134	92	572.964	91.9	930.706
91.9	103.07	92	183.421	92	320.002	92.1	572.739	92	930.389
92	103.017	92.1	183.336	92.1	319.874	92.2	572.511	92.1	930.08
92.1	102.965	92.2	183.249	92.2	319.738	92.3	572.283	92.2	929.766
92.2	102.911	92.3	183.166	92.3	319.604	92.4	572.059	92.3	929.447
92.3	102.863	92.4	183.082	92.4	319.471	92.5	571.837	92.4	929.128
92.4	102.812	92.5	182.996	92.5	319.333	92.6	571.61	92.5	928.814
92.5	102.759	92.6	182.909	92.6	319.198	92.7	571.383	92.6	928.488
92.6	102.708	92.7	182.82	92.7	319.061	92.8	571.162	92.7	928.162
92.7	102.657	92.8	182.739	92.8	318.929	92.9	570.944	92.8	927.844
92.8	102.608	92.9	182.659	92.9	318.798	93	570.718	92.9	927.532
92.9	102.564	93	182.574	93	318.666	93.1	570.501	93	927.22
93	102.514	93.1	182.495	93.1	318.535	93.2	570.274	93.1	926.912
93.1	102.469	93.2	182.411	93.2	318.405	93.3	570.051	93.2	926.588
93.2	102.419	93.3	182.326	93.3	318.274	93.4	569.825	93.3	926.26
93.3	102.368	93.4	182.241	93.4	318.145	93.5	569.597	93.4	925.944
93.4	102.318	93.5	182.157	93.5	318.02	93.6	569.376	93.5	925.639
93.5	102.27	93.6	182.068	93.6	317.888	93.7	569.159	93.6	925.329
93.6	102.219	93.7	181.98	93.7	317.756	93.8	568.944	93.7	925.018
93.7	102.165	93.8	181.897	93.8	317.627	93.9	568.724	93.8	924.714
93.8	102.117	93.9	181.812	93.9	317.498	94	568.513	93.9	924.398
93.9	102.066	94	181.727	94	317.369	94.1	568.303	94	924.076
94	102.014	94.1	181.639	94.1	317.24	94.2	568.092	94.1	923.762
94.1	101.962	94.2	181.556	94.2	317.108	94.3	567.887	94.2	923.448
94.2	101.914	94.3	181.476	94.3	316.978	94.4	567.679	94.3	923.139
94.3	101.867	94.4	181.392	94.4	316.851	94.5	567.469	94.4	922.837
94.4	101.819	94.5	181.312	94.5	316.724	94.6	567.255	94.5	922.536
94.5	101.771	94.6	181.23	94.6	316.597	94.7	567.037	94.6	922.232
94.6	101.724	94.7	181.148	94.7	316.473	94.8	566.818	94.7	921.951
94.7	101.676	94.8	181.071	94.8	316.346	94.9	566.618	94.8	921.671
94.8	101.626	94.9	180.994	94.9	316.229	95	566.415	94.9	921.4
94.9	101.583	95	180.915	95	316.103	95.1	566.197	95	921.139
95	101.539	95.1	180.836	95.1	315.984	95.2	565.976	95.1	920.884
95.1	101.497	95.2	180.759	95.2	315.863	95.3	565.765	95.2	920.626
95.2	101.453	95.3	180.683	95.3	315.74	95.4	565.55	95.3	920.359
95.3	101.41	95.4	180.599	95.4	315.611	95.5	565.338	95.4	920.089
95.4	101.359	95.5	180.518	95.5	315.487	95.6	565.131	95.5	919.816
95.5	101.315	95.6	180.436	95.6	315.361	95.7	564.921	95.6	919.537
95.6	101.267	95.7	180.357	95.7	315.233	95.8	564.72	95.7	919.254
95.7	101.217	95.8	180.278	95.8	315.107	95.9	564.518	95.8	918.962
95.8	101.174	95.9	180.204	95.9	314.982	96	564.311	95.9	918.67
95.9	101.129	96	180.124	96	314.861	96.1	564.102	96	918.374
96	101.083	96.1	180.045	96.1	314.735	96.2	563.901	96.1	918.083
96.1	101.039	96.2	179.967	96.2	314.612	96.3	563.705	96.2	917.775
96.2	101	96.3	179.892	96.3	314.492	96.4	563.505	96.3	917.453
96.3	100.957	96.4	179.813	96.4	314.366	96.5	563.3	96.4	917.141
96.4	100.913	96.5	179.735	96.5	314.242	96.6	563.091	96.5	916.826
96.5	100.87	96.6	179.661	96.6	314.123	96.7	562.886	96.6	916.515
96.6	100.829	96.7	179.584	96.7	314.003	96.8	562.692	96.7	916.207
96.7	100.78	96.8	179.507	96.8	313.884	96.9	562.486	96.8	915.886
96.8	100.735	96.9	179.425	96.9	313.765	97	562.285	96.9	915.566
96.9	100.688	97	179.347	97	313.648	97.1	562.082	97	915.251
97	100.644	97.1	179.273	97.1	313.527	97.2	561.877	97.1	914.931
97.1	100.598	97.2	179.197	97.2	313.413	97.3	561.674	97.2	914.605
97.2	100.555	97.3	179.121	97.3	313.296	97.4	561.474	97.3	914.305
97.3	100.51	97.4	179.048	97.4	313.181	97.5	561.27	97.4	914.02
97.4	100.468	97.5	178.979	97.5	313.066	97.6	561.069	97.5	913.727
97.5	100.427	97.6	178.901	97.6	312.947	97.7	560.877	97.6	913.449
97.6	100.384	97.7	178.823	97.7	312.827	97.8	560.682	97.7	913.17
97.7	100.344	97.8	178.746	97.8	312.708	97.9	560.492	97.8	912.889
97.8	100.297	97.9	178.678	97.9	312.585	98	560.3	97.9	912.623
97.9	100.254	98	178.606	98	312.467	98.1	560.098	98	912.359
98	100.211	98.1	178.531	98.1	312.349	98.2	559.897	98.1	912.086
98.1	100.167	98.2	178.452	98.2	312.227	98.3	559.702	98.2	911.817
98.2	100.121	98.3	178.378	98.3	312.108	98.4	559.506	98.3	911.55
98.3	100.077	98.4	178.307	98.4	311.996	98.5	559.309	98.4	911.274
98.4	100.034	98.5	178.235	98.5	311.887	98.6	559.112	98.5	911.005
98.5	99.9932	98.6	178.159	98.6	311.772	98.7	558.917	98.6	910.734
98.6	99.9521	98.7	178.083	98.7	311.655	98.8	558.725	98.7	910.448
98.7	99.9095	98.8	178.012	98.8	311.539	98.9	558.526	98.8	910.155
98.8	99.8661	98.9	177.941	98.9	311.419	99	558.324	98.9	909.868
98.9	99.8217	99	177.872	99	311.309	99.1	558.122	99	909.587
99	99.7803	99.1	177.797	99.1	311.195	99.2	557.914	99.1	909.305
99.1	99.7361	99.2	177.722	99.2	311.079	99.3	557.708	99.2	909.022
99.2	99.6912	99.3	177.65	99.3	310.963	99.4	557.512	99.3	908.739
99.3	99.648	99.4	177.581	99.4	310.849	99.5	557.316	99.4	908.456
99.4	99.6114	99.5	177.505	99.5	310.73	99.6	557.117	99.5	908.171
99.5	99.5669	99.6	177.431	99.6	310.615	99.7	556.925	99.6	907.888
99.6	99.5256	99.7	177.362	99.7	310.503	99.8	556.734	99.7	907.61
99.7	99.4882	99.8	177.295	99.8	310.394	99.9	556.542	99.8	907.342
99.8	99.4517	99.9	177.225	99.9	310.276	100	556.352	99.9	907.078
99.9	99.407	100	177.16	100	310.163	100.1	556.168	100	906.817
100	99.3687	100.1	177.092	100.1	310.048	100.2	555.98	100.1	906.543
100.1	99.3302	100.2	177.022	100.2	309.938	100.3	555.785	100.2	906.267
100.2	99.2917	100.3	176.954	100.3	309.83	100.4	555.596	100.3	905.99
100.3	99.2527	100.4	176.886	100.4	309.719	100.5	555.41	100.4	905.715
100.4	99.2138	100.5	176.815	100.5	309.606	100.6	555.223	100.5	905.445
100.5	99.1721	100.6	176.744	100.6	309.492	100.7	555.04	100.6	905.181
100.6	99.1297	100.7	176.676	100.7	309.377	100.8	554.858	100.7	904.917
100.7	99.0911	100.8	176.611	100.8	309.269	100.9	554.672	100.8	904.652
100.8	99.049	100.9	176.54	100.9	309.159	101	554.484	100.9	904.388
100.9	99.0108	101	176.468	101	309.046	101.1	554.284	101	904.122
101	98.9689	101.1	176.397	101.1	308.931	101.2	554.099	101.1	903.853
101.1	98.9247	101.2	176.333	101.2	308.821	101.3	553.918	101.2	903.597
101.2	98.8826	101.3	176.263	101.3	308.714	101.4	553.731	101.3	903.34
101.3	98.8412	101.4	176.19	101.4	308.603	101.5	553.553	101.4	903.078
101.4	98.8014	101.5	176.123	101.5	308.495	101.6	553.363	101.5	902.814
101.5	98.7646	101.6	176.053	101.6	308.385	101.7	553.172	101.6	902.553
101.6	98.7259	101.7	175.985	101.7	308.277	101.8	552.991	101.7	902.297
101.7	98.6844	101.8	175.92	101.8	308.171	101.9	552.8	101.8	902.036
101.8	98.6474	101.9	175.851	101.9	308.063	102	552.607	101.9	901.77
101.9	98.6053	102	175.779	102	307.953	102.1	552.422	102	901.506
102	98.5706	102.1	175.708	102.1	307.844	102.2	552.236	102.1	901.245
102.1	98.5321	102.2	175.636	102.2	307.734	102.3	552.046	102.2	900.97
102.2	98.4884	102.3	175.562	102.3	307.623	102.4	551.858	102.3	900.691
102.3	98.4448	102.4	175.488	102.4	307.509	102.5	551.675	102.4	900.419
102.4	98.4019	102.5	175.418	102.5	307.396	102.6	551.5	102.5	900.161
102.5	98.36	102.6	175.353	102.6	307.283	102.7	551.32	102.6	899.914
102.6	98.3215	102.7	175.287	102.7	307.169	102.8	551.135	102.7	899.656
102.7	98.281	102.8	175.219	102.8	307.054	102.9	550.948	102.8	899.394
102.8	98.2415	102.9	175.153	102.9	306.949	103	550.762	102.9	899.144
102.9	98.2044	103	175.088	103	306.844	103.1	550.576	103	898.898
103	98.1668	103.1	175.021	103.1	306.735	103.2	550.395	103.1	898.649
103.1	98.1274	103.2	174.956	103.2	306.629	103.3	550.216	103.2	898.402
103.2	98.0901	103.3	174.895	103.3	306.522	103.4	550.042	103.3	898.156
103.3	98.0505	103.4	174.833	103.4	306.419	103.5	549.868	103.4	897.914
103.4	98.0159	103.5	174.765	103.5	306.311	103.6	549.692	103.5	897.663
103.5	97.9764	103.6	174.698	103.6	306.206	103.7	549.509	103.6	897.408
103.6	97.9353	103.7	174.63	103.7	306.102	103.8	549.326	103.7	897.156
103.7	97.8971	103.8	174.565	103.8	305.999	103.9	549.154	103.8	896.906
103.8	97.8552	103.9	174.499	103.9	305.891	104	548.977	103.9	896.646
103.9	97.821	104	174.438	104	305.788	104.1	548.8	104	896.389
104	97.781	104.1	174.374	104.1	305.682	104.2	548.624	104.1	896.133
104.1	97.7409	104.2	174.31	104.2	305.58	104.3	548.448	104.2	895.873
104.2	97.707	104.3	174.249	104.3	305.482	104.4	548.273	104.3	895.618
104.3	97.669	104.4	174.187	104.4	305.377	104.5	548.096	104.4	895.37
104.4	97.6311	104.5	174.125	104.5	305.267	104.6	547.921	104.5	895.114
104.5	97.5897	104.6	174.058	104.6	305.159	104.7	547.742	104.6	894.861
104.6	97.5503	104.7	173.996	104.7	305.058	104.8	547.563	104.7	894.608
104.7	97.511	104.8	173.932	104.8	304.955	104.9	547.386	104.8	894.358
104.8	97.4767	104.9	173.867	104.9	304.852	105	547.214	104.9	894.11
104.9	97.4413	105	173.802	105	304.746	105.1	547.039	105	893.864
105	97.403	105.1	173.734	105.1	304.633	105.2	546.865	105.1	893.616
105.1	97.3619	105.2	173.672	105.2	304.528	105.3	546.689	105.2	893.363
105.2	97.3289	105.3	173.606	105.3	304.426	105.4	546.512	105.3	893.113
105.3	97.2913	105.4	173.54	105.4	304.32	105.5	546.332	105.4	892.866
105.4	97.2559	105.5	173.473	105.5	304.214	105.6	546.157	105.5	892.617
105.5	97.2167	105.6	173.413	105.6	304.111	105.7	545.987	105.6	892.365
105.6	97.1799	105.7	173.353	105.7	304.012	105.8	545.804	105.7	892.118
105.7	97.144	105.8	173.286	105.8	303.91	105.9	545.628	105.8	891.866
105.8	97.1024	105.9	173.223	105.9	303.812	106	545.452	105.9	891.61
105.9	97.0686	106	173.155	106	303.708	106.1	545.274	106	891.349
106	97.0316	106.1	173.091	106.1	303.604	106.2	545.101	106.1	891.098
106.1	96.9942	106.2	173.025	106.2	303.5	106.3	544.929	106.2	890.86
106.2	96.9558	106.3	172.961	106.3	303.398	106.4	544.759	106.3	890.629
106.3	96.9178	106.4	172.899	106.4	303.298	106.5	544.594	106.4	890.391
106.4	96.879	106.5	172.837	106.5	303.199	106.6	544.425	106.5	890.153
106.5	96.8432	106.6	172.777	106.6	303.1	106.7	544.259	106.6	889.921
106.6	96.8121	106.7	172.715	106.7	303.003	106.8	544.083	106.7	889.689
106.7	96.7775	106.8	172.652	106.8	302.907	106.9	543.906	106.8	889.458
106.8	96.7386	106.9	172.589	106.9	302.809	107	543.739	106.9	889.232
106.9	96.7037	107	172.529	107	302.707	107.1	543.57	107	889.012
107	96.6682	107.1	172.467	107.1	302.608	107.2	543.404	107.1	888.789
107.1	96.631	107.2	172.401	107.2	302.507	107.3	543.235	107.2	888.559
107.2	96.5952	107.3	172.334	107.3	302.407	107.4	543.069	107.3	888.32
107.3	96.5604	107.4	172.279	107.4	302.313	107.5	542.906	107.4	888.091
107.4	96.5285	107.5	172.22	107.5	302.223	107.6	542.75	107.5	887.869
107.5	96.4934	107.6	172.159	107.6	302.12	107.7	542.591	107.6	887.64
107.6	96.4615	107.7	172.098	107.7	302.021	107.8	542.429	107.7	887.412
107.7	96.4282	107.8	172.042	107.8	301.928	107.9	542.266	107.8	887.183
107.8	96.3961	107.9	171.982	107.9	301.829	108	542.095	107.9	886.946
107.9	96.3621	108	171.922	108	301.729	108.1	541.93	108	886.703
108	96.3285	108.1	171.867	108.1	301.636	108.2	541.761	108.1	886.473
108.1	96.294	108.2	171.814	108.2	301.538	108.3	541.593	108.2	886.249
108.2	96.2605	108.3	171.76	108.3	301.442	108.4	541.432	108.3	886.024
108.3	96.2293	108.4	171.706	108.4	301.349	108.5	541.26	108.4	885.799
108.4	96.1998	108.5	171.652	108.5	301.255	108.6	541.091	108.5	885.564
108.5	96.1688	108.6	171.597	108.6	301.159	108.7	540.936	108.6	885.319
108.6	96.1371	108.7	171.542	108.7	301.066	108.8	540.771	108.7	885.077
108.7	96.1066	108.8	171.481	108.8	300.971	108.9	540.615	108.8	884.845
108.8	96.0735	108.9	171.426	108.9	300.882	109	540.453	108.9	884.623
108.9	96.0414	109	171.366	109	300.784	109.1	540.286	109	884.394
109	96.0073	109.1	171.307	109.1	300.691	109.2	540.13	109.1	884.165
109.1	95.979	109.2	171.253	109.2	300.599	109.3	539.973	109.2	883.938
109.2	95.9468	109.3	171.194	109.3	300.503	109.4	539.811	109.3	883.701
109.3	95.9153	109.4	171.134	109.4	300.404	109.5	539.64	109.4	883.467
109.4	95.8847	109.5	171.072	109.5	300.308	109.6	539.469	109.5	883.231
109.5	95.8528	109.6	171.012	109.6	300.212	109.7	539.31	109.6	882.992
109.6	95.8202	109.7	170.952	109.7	300.116	109.8	539.153	109.7	882.765
109.7	95.7881	109.8	170.897	109.8	300.022	109.9	538.994	109.8	882.546
109.8	95.755	109.9	170.84	109.9	299.928	110	538.834	109.9	882.321
109.9	95.7233	110	170.786	110	299.836	110.1	538.674	110	882.094
110	95.6901	110.1	170.73	110.1	299.737	110.2	538.512	110.1	881.868
110.1	95.657	110.2	170.671	110.2	299.637	110.3	538.352	110.2	881.64
110.2	95.6209	110.3	170.618	110.3	299.542	110.4	538.194	110.3	881.416
110.3	95.5906	110.4	170.56	110.4	299.446	110.5	538.036	110.4	881.194
110.4	95.5577	110.5	170.504	110.5	299.355	110.6	537.874	110.5	880.98
110.5	95.5301	110.6	170.448	110.6	299.262	110.7	537.716	110.6	880.764
110.6	95.4992	110.7	170.39	110.7	299.167	110.8	537.551	110.7	880.537
110.7	95.4657	110.8	170.333	110.8	299.074	110.9	537.389	110.8	880.309
110.8	95.4323	110.9	170.28	110.9	298.982	111	537.235	110.9	880.072
110.9	95.3985	111	170.224	111	298.886	111.1	537.085	111	879.849
111	95.3636	111.1	170.168	111.1	298.801	111.2	536.926	111.1	879.633
111.1	95.3325	111.2	170.111	111.2	298.708	111.3	536.766	111.2	879.407
111.2	95.3009	111.3	170.057	111.3	298.619	111.4	536.613	111.3	879.185
111.3	95.2684	111.4	170.005	111.4	298.531	111.5	536.456	111.4	878.966
111.4	95.2382	111.5	169.949	111.5	298.44	111.6	536.302	111.5	878.744
111.5	95.2021	111.6	169.897	111.6	298.351	111.7	536.142	111.6	878.518
111.6	95.1709	111.7	169.843	111.7	298.258	111.8	535.981	111.7	878.305
111.7	95.1405	111.8	169.784	111.8	298.165	111.9	535.829	111.8	878.09
111.8	95.1046	111.9	169.733	111.9	298.079	112	535.67	111.9	877.888
111.9	95.0775	112	169.674	112	297.987	112.1	535.52	112	877.675
112	95.042	112.1	169.622	112.1	297.9	112.2	535.367	112.1	877.456
112.1	95.0108	112.2	169.565	112.2	297.809	112.3	535.214	112.2	877.233
112.2	94.9778	112.3	169.513	112.3	297.715	112.4	535.063	112.3	877.015
112.3	94.9436	112.4	169.46	112.4	297.626	112.5	534.911	112.4	876.803
112.4	94.9139	112.5	169.403	112.5	297.533	112.6	534.755	112.5	876.584
112.5	94.8796	112.6	169.347	112.6	297.444	112.7	534.603	112.6	876.368
112.6	94.8464	112.7	169.291	112.7	297.358	112.8	534.45	112.7	876.155
112.7	94.8132	112.8	169.237	112.8	297.269	112.9	534.297	112.8	875.934
112.8	94.7828	112.9	169.187	112.9	297.183	113	534.142	112.9	875.721
112.9	94.7533	113	169.131	113	297.1	113.1	533.987	113	875.503
113	94.7231	113.1	169.076	113.1	297.013	113.2	533.833	113.1	875.283
113.1	94.6921	113.2	169.021	113.2	296.919	113.3	533.678	113.2	875.073
113.2	94.6601	113.3	168.97	113.3	296.831	113.4	533.521	113.3	874.862
113.3	94.6305	113.4	168.918	113.4	296.739	113.5	533.364	113.4	874.646
113.4	94.5995	113.5	168.862	113.5	296.648	113.6	533.206	113.5	874.432
113.5	94.5667	113.6	168.805	113.6	296.556	113.7	533.049	113.6	874.222
113.6	94.5348	113.7	168.748	113.7	296.473	113.8	532.897	113.7	874.01
113.7	94.5	113.8	168.692	113.8	296.384	113.9	532.741	113.8	873.802
113.8	94.4636	113.9	168.638	113.9	296.293	114	532.59	113.9	873.589
113.9	94.4329	114	168.586	114	296.203	114.1	532.436	114	873.391
114	94.4029	114.1	168.53	114.1	296.117	114.2	532.286	114.1	873.19
114.1	94.3729	114.2	168.469	114.2	296.03	114.3	532.133	114.2	872.981
114.2	94.3392	114.3	168.413	114.3	295.944	114.4	531.976	114.3	872.77
114.3	94.3096	114.4	168.357	114.4	295.853	114.5	531.828	114.4	872.554
114.4	94.2771	114.5	168.306	114.5	295.764	114.6	531.69	114.5	872.335
114.5	94.2462	114.6	168.254	114.6	295.678	114.7	531.539	114.6	872.128
114.6	94.2173	114.7	168.201	114.7	295.592	114.8	531.382	114.7	871.926
114.7	94.1908	114.8	168.144	114.8	295.501	114.9	531.233	114.8	871.711
114.8	94.1582	114.9	168.09	114.9	295.415	115	531.079	114.9	871.5
114.9	94.1292	115	168.031	115	295.327	115.1	530.927	115	871.286
115	94.0974	115.1	167.977	115.1	295.241	115.2	530.78	115.1	871.071
115.1	94.0666	115.2	167.924	115.2	295.152	115.3	530.627	115.2	870.859
115.2	94.0326	115.3	167.869	115.3	295.062	115.4	530.475	115.3	870.646
115.3	94.0024	115.4	167.814	115.4	294.972	115.5	530.327	115.4	870.435
115.4	93.9675	115.5	167.758	115.5	294.883	115.6	530.181	115.5	870.228
115.5	93.9319	115.6	167.702	115.6	294.796	115.7	530.038	115.6	870.025
115.6	93.8983	115.7	167.648	115.7	294.712	115.8	529.896	115.7	869.826
115.7	93.8679	115.8	167.601	115.8	294.631	115.9	529.75	115.8	869.622
115.8	93.8438	115.9	167.55	115.9	294.546	116	529.608	115.9	869.418
115.9	93.8126	116	167.501	116	294.465	116.1	529.459	116	869.22
116	93.7854	116.1	167.449	116.1	294.382	116.2	529.309	116.1	869.02
116.1	93.753	116.2	167.393	116.2	294.291	116.3	529.166	116.2	868.819
116.2	93.7234	116.3	167.341	116.3	294.205	116.4	529.02	116.3	868.621
116.3	93.6949	116.4	167.285	116.4	294.115	116.5	528.877	116.4	868.416
116.4	93.6617	116.5	167.238	116.5	294.036	116.6	528.73	116.5	868.214
116.5	93.6365	116.6	167.188	116.6	293.953	116.7	528.581	116.6	868.005
116.6	93.6064	116.7	167.135	116.7	293.869	116.8	528.437	116.7	867.795
116.7	93.5742	116.8	167.087	116.8	293.79	116.9	528.3	116.8	867.593
116.8	93.5492	116.9	167.037	116.9	293.708	117	528.155	116.9	867.402
116.9	93.5214	117	166.98	117	293.62	117.1	528.013	117	867.201
117	93.4884	117.1	166.932	117.1	293.537	117.2	527.871	117.1	866.996
117.1	93.4619	117.2	166.881	117.2	293.452	117.3	527.732	117.2	866.789
117.2	93.4339	117.3	166.832	117.3	293.369	117.4	527.592	117.3	866.588
117.3	93.4089	117.4	166.781	117.4	293.286	117.5	527.446	117.4	866.393
117.4	93.3823	117.5	166.725	117.5	293.197	117.6	527.304	117.5	866.19
117.5	93.3511	117.6	166.675	117.6	293.116	117.7	527.165	117.6	865.997
117.6	93.327	117.7	166.628	117.7	293.032	117.8	527.028	117.7	865.808
117.7	93.3003	117.8	166.585	117.8	292.951	117.9	526.888	117.8	865.624
117.8	93.2763	117.9	166.537	117.9	292.867	118	526.748	117.9	865.437
117.9	93.2498	118	166.486	118	292.781	118.1	526.609	118	865.241
118	93.2207	118.1	166.439	118.1	292.699	118.2	526.464	118.1	865.044
118.1	93.1973	118.2	166.389	118.2	292.613	118.3	526.321	118.2	864.846
118.2	93.1665	118.3	166.339	118.3	292.53	118.4	526.179	118.3	864.649
118.3	93.1382	118.4	166.294	118.4	292.454	118.5	526.036	118.4	864.452
118.4	93.1154	118.5	166.247	118.5	292.37	118.6	525.891	118.5	864.256
118.5	93.0861	118.6	166.197	118.6	292.287	118.7	525.747	118.6	864.059
118.6	93.0564	118.7	166.147	118.7	292.208	118.8	525.609	118.7	863.867
118.7	93.0305	118.8	166.103	118.8	292.129	118.9	525.467	118.8	863.674
118.8	93.0062	118.9	166.052	118.9	292.047	119	525.334	118.9	863.472
118.9	92.9784	119	166.006	119	291.969	119.1	525.197	119	863.267
119	92.9513	119.1	165.958	119.1	291.884	119.2	525.058	119.1	863.07
119.1	92.9222	119.2	165.908	119.2	291.805	119.3	524.922	119.2	862.874
119.2	92.8949	119.3	165.86	119.3	291.732	119.4	524.785	119.3	862.686
119.3	92.8688	119.4	165.81	119.4	291.651	119.5	524.646	119.4	862.499
119.4	92.8433	119.5	165.76	119.5	291.569	119.6	524.508	119.5	862.317
119.5	92.8162	119.6	165.71	119.6	291.486	119.7	524.375	119.6	862.125
119.6	92.7887	119.7	165.669	119.7	291.407	119.8	524.234	119.7	861.937
119.7	92.7641	119.8	165.621	119.8	291.329	119.9	524.089	119.8	861.755
119.8	92.7375	119.9	165.575	119.9	291.252	120	523.95	119.9	861.568
119.9	92.709	120	165.53	120	291.176	120.1	523.809	120	861.378
120	92.6801	120.1	165.484	120.1	291.099	120.2	523.674	120.1	861.181
120.1	92.6512	120.2	165.441	120.2	291.021	120.3	523.544	120.2	860.992
120.2	92.6209	120.3	165.401	120.3	290.943	120.4	523.41	120.3	860.808
120.3	92.5968	120.4	165.351	120.4	290.858	120.5	523.275	120.4	860.617
120.4	92.5663	120.5	165.303	120.5	290.779	120.6	523.135	120.5	860.426
120.5	92.5343	120.6	165.252	120.6	290.696	120.7	522.997	120.6	860.23
120.6	92.503	120.7	165.204	120.7	290.615	120.8	522.862	120.7	860.039
120.7	92.4727	120.8	165.153	120.8	290.531	120.9	522.729	120.8	859.848
120.8	92.4404	120.9	165.103	120.9	290.446	121	522.592	120.9	859.666
120.9	92.4112	121	165.051	121	290.364	121.1	522.461	121	859.478
121	92.3813	121.1	165.005	121.1	290.285	121.2	522.334	121.1	859.286
121.1	92.3553	121.2	164.959	121.2	290.207	121.3	522.197	121.2	859.097
121.2	92.3303	121.3	164.91	121.3	290.127	121.4	522.059	121.3	858.911
121.3	92.3038	121.4	164.86	121.4	290.047	121.5	521.929	121.4	858.731
121.4	92.2781	121.5	164.811	121.5	289.974	121.6	521.796	121.5	858.553
121.5	92.2539	121.6	164.763	121.6	289.898	121.7	521.658	121.6	858.376
[truncated: 2,485 more rows]

## Sheet: 1400
Run 1; Ch 4; Cy 10; RefSub; MPY; conc=62.5_X	Run 1; Ch 4; Cy 10; RefSub; MPY; conc=62.5_Y	Run 1; Ch 4; Cy 11; RefSub; MPY; conc=125_X	Run 1; Ch 4; Cy 11; RefSub; MPY; conc=125_Y	Run 1; Ch 4; Cy 12; RefSub; MPY; conc=250_X	Run 1; Ch 4; Cy 12; RefSub; MPY; conc=250_Y	Run 1; Ch 4; Cy 13; RefSub; MPY; conc=500_X	Run 1; Ch 4; Cy 13; RefSub; MPY; conc=500_Y	Run 1; Ch 4; Cy 14; RefSub; MPY; conc=1000_X	Run 1; Ch 4; Cy 14; RefSub; MPY; conc=1000_Y
[truncated: 4,070 more rows]
