# Supplementary material for: aCPSF1 cooperates with terminator U-tract to dictate archaeal transcription termination efficacy
Source: eLife. 2021 Dec 29;10:e70464. doi: 10.7554/eLife.70464 (PMC8716108; doi:10.7554/eLife.70464)
Supplement: Figure 5—source data 1. [file elife-70464-fig5-data1.xlsx]

## Sheet: Figure5B
Quantitative RT-PCR analysis was conducted to quantify the luciferase and mCherry transcript abundances in various terminator constructs
Strain	WT			▽aCPSF1			com(WT)			com(Mu)			com(ΔKH)			Com(Csy-C1)			Com(Loki-C1)
Replicates	1	2	3	1	2	3	1	2	3	1	2	3	1	2	3	1	2	3	1	2	3
T1149	0.894111	0.906269	0.886344	0.559252	0.565694	0.576417	0.813402	0.837536	0.813369	0.627366	0.626264	0.617146	0.612113	0.631805	0.649475	0.824691	0.863944	0.861124	0.84073	0.872787	0.881132
T0204	0.87871	0.874139	0.877559	0.466093	0.500326	0.515459	0.813464	0.74393	0.822059	0.506243	0.581189	0.586005	0.5914	0.52764	0.514045	0.865989	0.833088	0.876002	0.858489	0.850803	0.863469
T0911	0.616743	0.605957	0.622498	0.317428	0.33029	0.299517	0.607876	0.576286	0.643598	0.46994	0.459004	0.499399	0.351268	0.443338	0.408403	0.49132	0.511975	0.531833	0.475811	0.545644	0.483646
T0229	0.5623	0.544063	0.529092	0.259867	0.249402	0.235604	0.534522	0.569286	0.454827	0.411576	0.38947	0.3762	0.363219	0.366467	0.396046	0.493934	0.563701	0.551329	0.545993	0.533754	0.50322
T1710	0.279322	0.271393	0.304854	0.22388	0.264598	0.343	0.267573	0.284735	0.30701	0.295063	0.320634	0.288613	0.174016	0.276852	0.284649	0.271296	0.278921	0.280753	0.235151	0.255254

## Sheet: Raw Data of qPCR
Strain	Terminator	Replicates	Ct SYBR of luciferase			Ct SYBR of mCherry
			1	2	3	1	2	3
WT	T0204	1	11.69	11.67	11.88	13.87	13.95	13.9
		2	11.73	11.62	11.68	13.84	13.92	13.76
		3	11.65	11.68	11.68	13.88	13.83	13.93
	T0229	1	11.91	11.87	11.96	11.98	11.91	12
		2	13.44	13.35	13.52	13.42	13.56	13.51
		3	12.25	12.4	12.26	12.2	12.17	12.22
	T0911	1	12.98	13	13.22	13.51	13.42	13.28
		2	13.08	12.92	13.24	13.44	13.36	13.31
		3	12.96	13.01	13.09	13.48	13.33	13.33
	T1149	1	13.71	13.69	13.71	16.3	16.26	16.25
		2	13.57	13.48	13.6	16.42	16.21	16.32
		3	13.91	13.77	13.84	16.4	16.26	16.33
	T1710	1	12.62	12.62	12.63	11.89	11.77	11.92
		2	13.49	13.66	13.55	12.77	12.9	12.83
		3	14.23	14.38	14.32	13.47	13.91	13.71
▽aCPSF1	T0204	1	13.07	13.06	13.03	12.84	12.8	12.83
		2	13.93	13.92	13.94	13.83	13.89	13.87
		3	13.69	13.64	13.67	13.53	13.72	13.65
	T0229	1	13.2	13.21	13.18	12.4	12.47	12.36
		2	13.64	13.56	13.73	12.93	12.85	12.81
		3	12.87	12.87	12.82	12	12.01	11.99
	T0911	1	12.91	12.92	12.92	12.24	12.25	12.29
		2	13.4	13.52	13.53	12.88	12.94	12.98
		3	13.46	13.55	13.66	12.87	12.91	12.99
	T1149	1	13.31	13.24	13.32	13.41	13.44	13.35
		2	13.42	13.41	13.5	13.53	13.56	13.67
		3	13.21	13.14	13.19	13.36	13.32	13.36
	T1710	1	13.12	13.01	13.14	12.27	12.12	12.28
		2	13.44	13.33	13.51	12.68	12.56	12.77
		3	13.07	12.91	13.04	12.13	12.99	12.14
Com(WT)	T0204	1	12.31	12.38	12.24	13.83	13.76	13.91
		2	12.94	13	13.22	14.88	14.82	14.85
		3	12.95	12.86	12.92	14.47	14.42	14.51
	T0229	1	13.32	13.36	13.47	14.96	14.98	14.95
		2	13.37	13.36	13.52	14.46	14.54	14.38
		3	13.17	13.16	13.19	14.76	14.82	14.91
	T0911	1	13.03	13.13	13.14	13.11	13.17	13.04
		2	13.82	13.8	13.72	14.05	13.86	13.96
		3	15.34	15.41	15.59	15.23	15.3	15.39
	T1149	1	13.34	13.5	13.46	13.75	13.82	13.68
		2	12.68	12.72	12.57	12.74	12.89	12.77
		3	12.69	12.72	12.77	13.26	13.12	13.13
	T1710	1	13.25	13.13	13.1	12.36	12.4	12.43
		2	13.33	13.3	13.25	12.57	12.56	12.6
		3	14.22	14.2	14.24	13.58	13.57	13.68
Com(Mu)	T0204	1	13.4	13.47	13.63	13.43	13.6	13.26
		2	14.36	14.35	14.25	14.53	14.44	14.76
		3	14.26	14.25	14.25	14.62	14.51	14.44
	T0229	1	13.08	13.1	13.09	12.76	12.69	12.64
		2	13.08	13.1	13.19	12.68	12.55	12.78
		3	14.14	14.17	14.09	13.66	13.8	13.63
	T0911	1	13.49	13.48	13.66	13.31	13.35	13.39
		2	12.97	12.84	12.86	12.72	12.66	12.51
		3	13.62	13.84	13.65	13.78	13.62	13.46
	T1149	1	13.99	14.09	14.04	14.42	14.52	14.49
		2	13.39	13.35	13.24	13.6	13.62	13.96
		3	13	13.19	12.95	13.52	13.32	13.31
	T1710	1	13.07	13.13	13.13	12.39	12.33	12.51
		2	13.53	12.97	13.02	12.43	12.61	12.52
		3	13.24	13.01	13.14	12.44	12.3	12.5
Com(ΔKH)	T0204	1	12.78	12.8	12.56	12.85	12.87	13.04
		2	12.52	12.3	12.57	12.4	12.37	12.45
		3	13.4	13.35	13.21	13.11	13.31	13.38
	T0229	1	12.7	12.78	12.82	12.24	12.35	12.08
		2	12.52	12.39	12.68	12.05	11.89	11.99
		3	12.51	12.46	12.78	11.93	12.2	12.22
	T0911	1	12.68	12.86	12.81	12.14	12.15	12.33
		2	12.19	12.36	12.4	11.98	11.98	11.96
		3	13.6	13.88	13.79	13.39	13.42	13.35
	T1149	1	13.46	14.06	13.73	14.07	14.09	14.09
		2	12.52	12.76	12.74	13.08	13.17	12.92
		3	12.54	12.59	12.72	12.93	13.15	13.17
	T1710	1	13.32	13.41	13.42	12.5	12.44	12.34
		2	12.64	12.58	12.62	11.8	11.95	11.78
		3	12.4	12.47	12.4	11.87	11.63	11.5
Com(Csy-C1)	T0204	1	13.24	12.84	13.31	15.2	15.47	15.1
		2	13.11	13.06	13.19	14.81	15.08	14.76
		3	13.11	13.25	13.28	15.44	15.56	15.45
	T0229	1	12.82	12.82	12.86	12.91	12.55	12.61
		2	12.8	12.82	12.93	13.01	12.95	12.9
		3	12.81	12.75	12.85	12.9	12.82	12.85
	T0911	1	12.93	12.9	12.82	12.78	12.68	12.72
		2	13.7	13.46	13.72	13.92	13.53	13.33
		3	12.8	12.72	12.68	12.93	12.68	12.74
	T1149	1	13.05	13.22	13.09	14.83	14.79	14.76
		2	12.83	12.86	12.7	14.86	14.82	14.98
		3	12.96	13.05	13	15.13	15.08	15
	T1710	1	12.58	12.56	12.55	11.84	11.75	11.74
		2	12.82	12.65	12.8	11.95	11.97	12.07
		3	12.73	12.53	12.61	11.9	11.88	11.8
Com(Loki-C1)	T0204	1	12.86	12.73	12.99	14.86	14.94	14.85
		2	14.01	13.95	14.18	16.03	16.04	16.06
		3	12.85	12.66	12.84	14.82	14.73	15.06
	T0229	1	12.9	12.85	13.03	13.08	12.9	12.92
		2	12.67	12.51	12.68	12.86	12.56	12.4
		3	12.52	12.36	12.53	12.3	12.35	12.34
	T0911	1	12.92	12.93	12.92	12.63	12.84	12.69
		2	13.76	13.82	14.03	13.9	13.9	14.07
		3	14.03	13.99	14.08	13.81	13.82	14.01
	T1149	1	12.4	12.41	12.44	14.1	14.32	14.24
		2	12.66	12.8	12.71	14.81	14.9	15.07
		3	12.68	12.7	12.83	15.06	15	15.1
	T1710	1	12.83	12.89	12.9	12.05	11.98	12.03
		2	13.16	13.13	13.13	12.33	12.39	12.32
