# Supplementary material for: aCPSF1 cooperates with terminator U-tract to dictate archaeal transcription termination efficacy
Source: eLife. 2021 Dec 29;10:e70464. doi: 10.7554/eLife.70464 (PMC8716108; doi:10.7554/eLife.70464)
Supplement: Figure 6—figure supplement 3—source data 2. [file elife-70464-fig6-figsupp3-data2.xlsx]

## Sheet: Sheet
	OD600
Time (h)	S2+pMEV2			▼C1			Com(WT)			Com(ΔC13)
	1	2	3	1	2	3	1	2	3	1	2	3	Replicates
0	0.114	0.115	0.118	0.125	0.116	0.114	0.116	0.122	0.118	0.12	0.119	0.12
7	0.118	0.112	0.118	0.128	0.12	0.115	0.118	0.118	0.12	0.124	0.121	0.122
13	0.133	0.131	0.134	0.142	0.131	0.126	0.134	0.132	0.131	0.13	0.129	0.126
22	0.158	0.158	0.162	0.154	0.142	0.13	0.146	0.129	0.158	0.141	0.139	0.139
26	0.189	0.186	0.19	0.183	0.165	0.156	0.185	0.187	0.187	0.151	0.149	0.147
32	0.242	0.234	0.24	0.205	0.188	0.181	0.244	0.236	0.23	0.16	0.16	0.155
37	0.312	0.307	0.309	0.231	0.211	0.202	0.3	0.302	0.284	0.176	0.169	0.167
45.5	0.501	0.485	0.489	0.282	0.26	0.24	0.458	0.449	0.437	0.193	0.187	0.186
52	0.707	0.698	0.694	0.331	0.308	0.288	0.664	0.636	0.59	0.216	0.206	0.206
55	0.746	0.751	0.751	0.367	0.332	0.316	0.766	0.752	0.7	0.245	0.219	0.218
61	0.755	0.752	0.759	0.412	0.388	0.354	0.777	0.774	0.765	0.259	0.241	0.243
69.5	0.758	0.755	0.757	0.519	0.473	0.443	0.782	0.787	0.771	0.307	0.284	0.284
75	0.762	0.756	0.761	0.575	0.546	0.506	0.786	0.778	0.777	0.35	0.315	0.319
80	0.767	0.762	0.768	0.584	0.554	0.545	0.779	0.78	0.787	0.403	0.351	0.365
86	0.764	0.766	0.767	0.59	0.56	0.554	0.795	0.793	0.787	0.456	0.4	0.412
94	0.775	0.771	0.78	0.596	0.566	0.556	0.797	0.794	0.792	0.56	0.481	0.49
102	0.773	0.772	0.779	0.594	0.561	0.553	0.805	0.796	0.796	0.681	0.586	0.601
109.5	0.778	0.767	0.774	0.589	0.559	0.547	0.794	0.788	0.789	0.712	0.696	0.707
124										0.719	0.699	0.71
