# Supplementary material for: aCPSF1 cooperates with terminator U-tract to dictate archaeal transcription termination efficacy
Source: eLife. 2021 Dec 29;10:e70464. doi: 10.7554/eLife.70464 (PMC8716108; doi:10.7554/eLife.70464)
Supplement: Figure 6—source data 2. [file elife-70464-fig6-data2.xlsx]

## Sheet: Sheet1
	OD600
Time (h)	S2+pMEV2			aCPSF1		Com(WT)			Com(ΔKH)
	1	2	3	1	2	1	2	3	1	2	3	Replicates
0	0.161	0.158	0.159	0.159	0.162	0.163	0.172	0.163	0.167	0.16	0.167
8	0.168	0.166	0.175	0.176	0.169	0.173	0.18	0.179	0.178	0.187	0.171
15	0.196	0.207	0.211	0.186	0.175	0.2	0.214	0.212	0.198	0.206	0.196
24	0.252	0.261	0.283	0.205	0.208	0.239	0.26	0.261	0.219	0.202	0.217
29	0.308	0.328	0.362	0.226	0.218	0.281	0.312	0.32	0.238	0.241	0.227
34	0.374	0.421	0.458	0.237	0.234	0.375	0.422	0.442	0.271	0.274	0.256
39	0.496	0.546	0.597	0.269	0.252	0.512	0.579	0.606	0.29	0.298	0.281
47	0.747	0.735	0.729	0.337	0.303	0.669	0.733	0.748	0.347	0.342	0.329
55	0.749	0.739	0.73	0.433	0.365	0.676	0.721	0.757	0.427	0.406	0.407
63.5	0.734	0.73	0.717	0.534	0.424	0.673	0.733	0.749	0.525	0.477	0.487
73	0.741	0.734	0.723	0.558	0.51	0.678	0.734	0.743	0.565	0.553	0.561
82	0.737	0.736	0.707	0.558	0.501	0.674	0.735	0.747	0.573	0.571	0.557
