# Supplementary material for: aCPSF1 cooperates with terminator U-tract to dictate archaeal transcription termination efficacy
Source: eLife. 2021 Dec 29;10:e70464. doi: 10.7554/eLife.70464 (PMC8716108; doi:10.7554/eLife.70464)
Supplement: Supplementary file 1. [file elife-70464-supp1.xlsx]

## Sheet: Sheet1
Datasheet S1. Term-seq identified transcriptional termination sites (TTSs) and the read ratios of TTS downstream nucleotide (+1) to TTS (-1) in M. maripaludis S2 and ▽aCPSF1, respectively
Upstream Gene: gene upstream the identified TTS .
Number of TTS: identified TTS numbers in each gene, including the primary and secondary TTSs defined by the algorithm described in Methods.
Position: nuclotide of the identified TTS.
nt to stop codon: base numbers from a TTS to the upstream gene stop codon.
S2_head.reads and ▽aCPSF1_head.reads: the Term-seq reads of TTS in strains S2 and ▽aCPSF1, respectively.
S2_ratio[+1]/[-1] and ▽aCPSF1_ratio[+1]/[-1]: read ratio of the immediate downstream nuclotide (+1) to TTS (-1) in strains S2 and ▽aCPSF1, respectively.
Sequence from -30 to +5: sequence of the RNA fragment from 30 nt upstream (30) to 5 nt downstream of the identified TTS (+5)
Upstream Gene	Number of TTS	Strand	Position	TTS categories	nt to stop codon	S2_head.reads	S2_ratio[+1]/[-1]	▽aCPSF1_head.reads	▽aCPSF1_ratio[+1]/[-1]	Sequence from -30 to +5
MMP0001	1	+	10581	Primary	196	6	1.21428	3	1.04225	UAAAAUUAAUAGAAACAUAUGUUGGGCCAGCAAUA
MMP0002	2	+	11518	Primary	38	32	1.14035	12	1.03399	AAAAAUAAAAUAACUUUUUUCAAAUUUUUUAAAUU
		+	11532	Secondary	52	25	1.17857	53	1.19703	CUUUUUUCAAAUUUUUUAAAUUAAUUCUUUUAAGUC
MMP0003	2	-	11474	Primary	43	45	1.25714	32	1.12549	AGUUAUUUUAUUUUUUUAUUACUUUAUUUUAAAGA
		-	11342	Secondary	175	11	1.11956	6	1.02667	UGCCGCAGUGAUUGUAACUAUUCCGUAAUUUUCAAG
MMP0006	3	+	16447	Primary	26	54	1.50467	9	1.09677	AUAAUUUUUAUUUUUACUUUUUUUAAUUUAAAAAA
		+	16441	Secondary	20	47	1.20796	7	1.06731	UAGAAAAAUAAUUUUUAUUUUUACUUUUUUUAAUUU
		+	16454	Secondary	33	13	1.16667	1	1.01075	UUUAUUUUUACUUUUUUUAAUUUAAAAAAAUAAUAA
MMP0007	1	+	17620	Primary	47	53	1.60227	66	1.45205	UAAAAUAAAAAUUAAUUUAUUUCGAUUUUUCCCUG
MMP0008	1	-	17565	Primary	37	10	1.10989	2	1.01105	UUUAUUUUAUUUUAUUUUAUUUUAUUUUUUAGACA
MMP0010	1	-	20408	Primary	98	22	5.39912	29	2.11534	AUUGACGAAAUAAAUGAUAGUUCAAACCUUAAAUU
MMP0013	1	+	24148	Primary	101	48	1.66666	31	1.37349	CUAAAUUCCAAAUCUAUUUUGUACUUUUUUGAGUU
MMP0014	2	-	24041	Primary	20	10	1.10989	1	1.0101	UAUUUUAUAAUUUUUUUAAUUUUUUAUUCUAAGAG
		-	24028	Secondary	33	8	1.10256	0	1	UUUUUAAUUUUUUAUUCUAAGAGAUUUUUUUCAGCA
MMP0017	1	-	26617	Primary	56	10	1.52629	3	1.09677	UUUAACACAAUAAUUUAAUCUGACUUUUUUAUAAU
MMP0020	3	-	28933	Primary	56	136	1.68341	119	1.25319	CUUUGAAUCUUUAUUGUUUUUAUUAUUUUUUAAUU
		-	28921	Secondary	68	12	1.66663	3	1.03704	UAUUGUUUUUAUUAUUUUUUAAUUGUUACUUUAAUU
		-	28966	Secondary	23	77	1.12941	126	1.11539	CCCAGUAAAUACGAUUUUAUUUUAACUUUUUAUACU
MMP0021	1	+	30431	Primary	25	7	1.10937	1	1.01613	AAUAAUAAAUUAAUUGAAUUUAAUUUUUUUCCCGA
MMP0022	3	-	30398	Primary	13	16	1.21917	4	1.0597	AAAUUAAAUUCAAUUAAUUUAUUAUUUUUUACAGA
		-	30349	Secondary	62	7	1.17948	10	1.2439	UGCUACUGGACUGCCUGUUCUUUUUACUUUUAAAGA
		-	30384	Secondary	27	8	1.14035	11	1.2	UUAAUUUAUUAUUUUUUACAGAUUAUUUUUUGAACU
MMP0024	1	+	32880	Primary	18	23	1.1036	-326	0.734744	UUAUAUGGAUAAAUUCUUUUUUAAAUUUUUAAAAA
MMP0025	2	-	32881	Primary	35	141	1.44479	527	1.37751	UAUUCACUAUUUUUUUACACUUUAUUUUUUAAAAA
		-	32873	Secondary	43	59	1.4836	79	1.12043	UAUUUUUUUACACUUUAUUUUUUAAAAAUUUAAAAA
MMP0027	1	-	42158	Primary	23	15	3.49958	22	1.84612	GGUUUAAUUAUUUUCAAAUUAAUUUUUUUUAUAUA
MMP0028	1	+	44756	Primary	44	15	1.10714	2	1.01449	AUUUUAAAAAAGAAAAUAUGUUAUUUUUUUAAUUA
MMP0029	3	-	44724	Primary	53	62	1.65263	25	1.22936	AAAAUAACAUAUUUUCUUUUUUAAAAUUUUAAAAA
		-	44713	Secondary	64	7	1.13207	0	1	AUUUUCUUUUUUAAAAUUUUAAAAACAGGAUUUAAU
		-	44732	Secondary	45	23	1.10952	8	1.04848	UUAAUUAAAAAAAUAACAUAUUUUCUUUUUUAAAAU
MMP0030	2	+	47803	Primary	146	22	1.84612	3	1.05	UUGUAAAAUAAUUAAUGAUAUUCCAAUUUUAAGAG
		+	47747	Secondary	90	10	1.17241	48	1.70587	UAUCUGGAUUCAGCCUGUUAGCAGGAGCUCUGUUUU
MMP0031	2	+	48880	Primary	125	12	1.66663	8	1.08247	UAAUAGAUUACUACACUAUUUUUUAUUUAUCAGUU
		+	48841	Secondary	86	10	1.24999	2	1.02062	UUGUUUUUUAUUAUUGGAUAGAUAAGGCUAUUUUAA
MMP0033	1	+	51888	Primary	142	14	1.18182	11	1.04453	AAAAAGAAAAAAUAAAAGAGACAUCGUUCUUCUCC
MMP0034	3	+	52730	Primary	16	69	1.95832	40	1.12346	CUUUAACAAAUUAAUUUUAAUUUAUUUUUUAGUGG
		+	52736	Secondary	22	7	1.20588	2	1.00671	ACAAAUUAAUUUUAAUUUAUUUUUUAGUGGUUUUAU
		+	52760	Secondary	46	8	1.57139	114	1.90475	UAGUGGUUUUAUGAAAGCUCUCGUUGUUGGGGCAUG
MMP0036	2	+	54470	Primary	120	42	3.21041	60	1.42253	ACCUAAUUUUAAUGAAUAUUUAACUUUUUUAACAG
		+	54403	Secondary	53	16	1.14679	60	1.20134	UUAAAUGAUCUUCUAAACGACGCUACUUUAUAUGAA
MMP0037	1	+	55060	Primary	112	6	1.10345	-1	0.992806	AAGUCAUACAUACUGCACACGUAAUUAUCAUUCUA
MMP0038	3	-	54872	Primary	103	24	1.23762	3	1.01744	UAUUUGAAACUUCAUUAUUUGUUCUUUUUUUAAAU
		-	54863	Secondary	112	23	1.63887	8	1.05369	ACUUCAUUAUUUGUUCUUUUUUUAAAUUUAUCAAUU
		-	54865	Secondary	110	8	1.13115	0	1	AAACUUCAUUAUUUGUUCUUUUUUUAAAUUUAUCAA
MMP0039	1	-	55782	Primary	94	9	1.49997	22	1.37288	AUAUUAAAAAAAACAGGUAGAAAACUUGAUGAACG
MMP0040	2	-	56837	Primary	109	44	2.75993	57	2.07545	AACUCCGAAAAAAAGAAAAAUAUCUAGGGUUGGAA
		-	56861	Secondary	85	16	1.23188	39	1.31451	UCGCCAAUACAUUAAAAGGAGUUAAAACUCCGAAAA
MMP0041	1	-	58555	Primary	50	7	1.41174	6	1.11321	UGACAGAAUCCAAAGCAGAGAUUCCAAUCCAUCUG
MMP0042	2	-	59583	Primary	60	26	1.39393	62	1.48062	UCUGUUACAAAAGAAGAUACUAAAAAGUCUGAAAG
		-	59486	Secondary	157	8	1.22222	19	1.26388	AAGGAAGAAGAAUUAAUCUGUCCUGUCUGCGGUAGU
MMP0044	2	+	63070	Primary	156	18	1.32142	11	1.18033	AAGAGUAAGACCUUAUCUUUCAAUUUUAACAUAUC
		+	63059	Secondary	145	9	1.12676	2	1.02703	UGCAGGCGGUAAAAGAGUAAGACCUUAUCUUUCAAU
MMP0045	3	+	63912	Primary	31	133	1.74719	31	1.24219	UACAUUUAACUAGCUAUUUUAACUUUUUUUAAAAU
		+	63919	Secondary	38	78	2.03999	12	1.12371	UAACUAGCUAUUUUAACUUUUUUUAAAAUUUAAAGG
		+	63925	Secondary	44	17	1.45945	0	1	GCUAUUUUAACUUUUUUUAAAAUUUAAAGGUGUUUU
MMP0046	2	+	64455	Primary	71	36	1.44999	33	1.11538	CCAGUAAUCUGUCCUUUUUUUGCCAUUUUUCCUAA
		+	64480	Secondary	96	19	1.41303	40	1.19417	AUUUUUCCUAAAAUAUCUAAGGUUUCUUUUUCAAGU
MMP0050	2	+	66812	Primary	28	50	2.04164	10	1.11363	AAUUUAAAAUUAAAUUUAUAAAUCUUUUUUAGUGA
		+	66821	Secondary	37	6	1.37498	5	1.06757	AUUAAAUUUAUAAAUCUUUUUUAGUGAUUUUAUGAA
MMP0051	3	+	67141	Primary	29	165	2.07842	131	1.57456	ACUUAUUUUAAAUACUUUUUUAGAAUUUUUGGAAA
		+	67132	Secondary	20	40	1.10444	26	1.05702	GAAUGAAAUAACUUAUUUUAAAUACUUUUUUAGAAU
		+	67149	Secondary	37	27	1.27835	2	1.01075	UUAAAUACUUUUUUAGAAUUUUUGGAAAGAUUGUAC
MMP0053	3	-	68136	Primary	20	22	1.33333	2	1.03509	AGAUUUUUAAAUAUAUUUAAGCUCUUUUUUGCAGA
		-	68100	Secondary	56	7	1.27999	2	1.04	UUUUCUACUUAAAUUAAAUCAUAAAUUUAUUAUACC
		-	68127	Secondary	29	12	1.23999	1	1.01961	AAAUAUAUUUAAGCUCUUUUUUGCAGAUUUUCUACU
MMP0056	3	-	70072	Primary	30	13	1.19117	3	1.15789	AUAAAAUAGAUUUCCCCAAUUUACGUUUUUUAACC
		-	70025	Secondary	77	6	1.85702	1	1.08333	AUUCUUUAAAACACUAUUUUAAACUGUUUUUAAAUC
		-	70049	Secondary	53	11	1.31428	1	1.08333	ACGUUUUUUAACCUAAACUUACUUAUUCUUUAAAAC
MMP0057	3	-	71276	Primary	20	45	1.45454	18	1.1978	AAUUGAAUAAAUCCUAAUUUUUAAUUUUUUAAUGA
		-	71206	Secondary	90	31	3.21413	23	1.69695	UAUUUAAAUAUUAAAAAAUAGUCUUGAAGAUAUUUA
		-	71242	Secondary	54	6	1.12	2	1.0274	GAUUUAGUCCCGAAUUAGCAGUUAAUAUCAUCGAAA
MMP0058	6	+	73588	Primary	24	1986	1.87258	971	1.48405	CAAUAAUUAAAUAACUUUUUUAAAUUUUUUAAAUU
		+	73595	Secondary	31	654	2.05145	412	1.59366	UUAAAUAACUUUUUUAAAUUUUUUAAAUUUCAAAAA
		+	73599	Secondary	35	98	1.23902	54	1.08911	AUAACUUUUUUAAAUUUUUUAAAUUUCAAAAAAAAA
		+	73603	Secondary	39	56	1.21374	14	1.03483	CUUUUUUAAAUUUUUUAAAUUUCAAAAAAAAAGAGU
		+	73607	Secondary	43	23	1.11386	-1	0.997519	UUUAAAUUUUUUAAAUUUCAAAAAAAAAGAGUUUUA
		+	73648	Secondary	84	26	1.20155	55	1.16871	GUUUUAAAGGUUUAUUUGGCCUUUGAUUUUUCAAUG
MMP0059	1	-	73596	Primary	33	65	1.26104	2	1.00461	UUUAAAACUAAAAUAAAACUCUUUUUUUUUGAAAU
MMP0060	7	-	74134	Primary	26	503	2.75261	573	1.77537	CUAAUUAUUUUACUCUUUUUAAAUUGUUUUGAUUU
		-	74066	Secondary	94	16	1.88884	32	1.1435	AUAUAAUUUUACGAUUAUAUUAACUUGUUUUAUUCA
		-	74076	Secondary	84	6	1.16216	4	1.01434	UUUAAACAGAAUAUAAUUUUACGAUUAUAUUAACUU
		-	74104	Secondary	56	22	1.29333	29	1.08055	UGAUUUCAAUUGAAACUAUUUUAUAUAAUUUAAACA
		-	74111	Secondary	49	13	1.10156	18	1.04327	AUUGUUUUGAUUUCAAUUGAAACUAUUUUAUAUAAU
		-	74113	Secondary	47	19	1.13475	2	1.00458	AAAUUGUUUUGAUUUCAAUUGAAACUAUUUUAUAUA
		-	74124	Secondary	36	35	1.19663	4	1.00718	UUACUCUUUUUAAAUUGUUUUGAUUUCAAUUGAAAC
MMP0062	3	-	75110	Primary	19	89	1.41014	71	1.16322	UAGUAGAAUAAUCUACCUGCUUCUUUCUUUAGAAA
		-	75055	Secondary	74	38	1.38	66	1.34555	UGAAAACAUAUUUUUCUGGAGUGUCCACACUAGGAG
		-	75101	Secondary	28	23	1.17293	11	1.03819	UAAUCUACCUGCUUCUUUCUUUAGAAACACUGUGGU
MMP0063	4	+	76379	Primary	20	66	1.21154	37	1.05082	AAGAGAAUAACUUUCUUUUUUUAAUUUUUCAAACU
		+	76388	Secondary	29	57	1.29082	30	1.04601	AACUUUCUUUUUUUAAUUUUUCAAACUCUUUAAAUU
		+	76401	Secondary	42	39	1.36448	87	1.19037	UAAUUUUUCAAACUCUUUAAAUUCUUCUUUUAUCUG
		+	76430	Secondary	71	10	1.33332	21	1.07721	UUAUCUGAAAAAUAUAUCUAUUUAUUGGUCUAUUUG
MMP0065	2	+	78406	Primary	64	131	1.91608	36	1.64285	CUAUUAUAUAUUUUUCAGAAUAUAUUUUUUCAAAA
		+	78414	Secondary	72	16	1.63997	2	1.07407	AUAUUUUUCAGAAUAUAUUUUUUCAAAAUGUUGAAU
MMP0066	7	+	78822	Primary	38	194	2.06593	280	1.46053	AAUAUUUUUUUAUUCUUUUUUUCAAAUAUUCAAAU
		+	78815	Secondary	31	87	1.20964	139	1.1379	AUUCUAAAAAUAUUUUUUUAUUCUUUUUUUCAAAUA
		+	78829	Secondary	45	36	1.43373	47	1.10173	UUUUUAUUCUUUUUUUCAAAUAUUCAAAUUUAUCUA
		+	78831	Secondary	47	9	1.13043	52	1.12871	UUUAUUCUUUUUUUCAAAUAUUCAAAUUUAUCUAUU
		+	78833	Secondary	49	10	1.17544	15	1.04043	UAUUCUUUUUUUCAAAUAUUCAAAUUUAUCUAUUUU
		+	78838	Secondary	54	11	1.31428	93	1.40789	UUUUUUUCAAAUAUUCAAAUUUAUCUAUUUUGAUAG
		+	78841	Secondary	57	12	1.59997	21	1.10448	UUUUCAAAUAUUCAAAUUUAUCUAUUUUGAUAGGAA
MMP0068	2	+	80648	Primary	60	16	2.99975	22	1.34374	UUUUUAUAUUUUAAAAUCAAAUUAUUUUUUAUGAA
		+	80623	Secondary	35	6	1.125	0	1	UAACUUUUAUUUUUUUUAGAAAUUUAUUUUUAUAUU
MMP0069	1	+	81066	Primary	118	453	3.55931	271	3.16798	UAAUAUUCAUUGUGGGGUAUUGUCCACACAGUUUA
MMP0070	1	+	82260	Primary	120	17	1.56665	1199	3.12966	GCGCUCUACCAGGCUGAGCCACUGAAGCACACUUA
MMP0071	3	-	82574	Primary	87	17	1.31481	1	1.00157	AAAAUAAAAAUGGUAGCCCAGCGCGGAUUCGAACC
		-	82516	Secondary	145	6	1.85702	14	1.14894	CGGAUGAUUGGCCACUACACUACUGGGCUUCUUUAA
		-	82526	Secondary	135	12	1.54543	254	1.98069	UCCAAAGGCACGGAUGAUUGGCCACUACACUACUGG
MMP0072	1	+	84858	Primary	29	14	1.82348	6	1.15789	AUAACUCAAAUUUUAUUUUCACAUUUUUUUACAAU
MMP0073	5	+	86193	Primary	38	84	1.37004	29	1.10507	UUAAUUAUUUUUUUUAAUAUUUCUCAUUUUAAAAA
		+	86201	Secondary	46	38	1.39583	14	1.07035	UUUUUUUUAAUAUUUCUCAUUUUAAAAAUUUAUUUU
		+	86203	Secondary	48	9	1.1125	5	1.02618	UUUUUUAAUAUUUCUCAUUUUAAAAAUUUAUUUUAA
		+	86206	Secondary	51	14	1.2745	5	1.02873	UUUAAUAUUUCUCAUUUUAAAAAUUUAUUUUAAAUU
		+	86226	Secondary	71	16	2.14278	60	1.85713	AAAUUUAUUUUAAAUUUCCACGUGAUAUUAUGAACA
MMP0076	4	-	87503	Primary	105	7699	2.14586	15377	1.9005	GAAUCACUCAUUCGAUUCUUUUAUUUUUUUAUUAG
		-	87414	Secondary	194	209	1.43633	297	1.16454	AAAAACGUACUAUUGACAUUAUUUUUGUUUUCAACC
		-	87492	Secondary	116	618	1.55575	67	1.01742	UUCGAUUCUUUUAUUUUUUUAUUAGUCUAGUUAUAU
		-	87495	Secondary	113	766	1.41294	141	1.02971	UCAUUCGAUUCUUUUAUUUUUUUAUUAGUCUAGUUA
MMP0077	1	+	88729	Primary	40	18	1.21951	12	1.17391	CAAAUUUAAUAAUCUUUUAAUUUUUCUUUUAAAGA
MMP0078	2	-	88550	Primary	155	18	1.59998	13	1.38234	UUUUAUCAGUUGGUGAUACCGGCUGAAUACAAAGU
		-	88596	Secondary	109	15	1.24193	12	1.19047	AAUAGCCAUUAAUUCAAAUAUCUUUUUUUUCGAAGU
MMP0079	3	+	90377	Primary	15	47	1.44339	11	1.19298	GAUAUUAAAAAAUAAUUUUUUAUAUUUUUUAAAAU
		+	90424	Secondary	62	9	1.20454	0	1	UACUUGGAUUAACCUAUAACAAAUAAUUUUUCAGAG
		+	90531	Secondary	169	18	1.78258	40	1.56337	GGCUUAUCAUGUGCGGAAUUAUCGGAUUUAUGAGUA
MMP0080	2	+	91765	Primary	165	14	1.37837	8	1.02685	CAGGGAAAUAAAAUUUUAACUUACCCUAACAGAUG
		+	91664	Secondary	64	10	1.18868	17	1.10429	CCUUCAACAGUUCCGCCAAAAUACAAAGUUUUUGUG
MMP0083	5	+	95095	Primary	32	298	2.43961	184	1.6595	CCUUUUAAUUUUUAAUAAACUUACUUUUUUAGAAA
		+	95107	Secondary	44	33	1.34375	4	1.02273	UUAAUAAACUUACUUUUUUAGAAAUAAAUUUGAUUA
		+	95122	Secondary	59	12	1.15789	10	1.04785	UUUUAGAAAUAAAUUUGAUUAACUAAAAUUUAACUU
		+	95128	Secondary	65	16	1.30188	3	1.01463	AAAUAAAUUUGAUUAACUAAAAUUUAACUUUAUAAA
		+	95130	Secondary	67	10	1.2564	8	1.04167	AUAAAUUUGAUUAACUAAAAUUUAACUUUAUAAAAU
MMP0086	1	-	97056	Primary	121	33	3.53827	123	2.41378	GCCAUACAAUGCAAUUUACGCGGUAACCGAGCGAA
MMP0087	4	-	97728	Primary	33	37	1.61666	26	1.30588	UUCAUUUCUAAAAACUUUUUUUGAAUUUUUAAAGA
		-	97665	Secondary	96	6	2.99933	7	1.2258	AUUUAAAUCAUUUAUUUUAUAUACCAAUUUUAAGAU
		-	97676	Secondary	85	6	1.33332	4	1.07547	ACUAAAAAAACAUUUAAAUCAUUUAUUUUAUAUACC
		-	97736	Secondary	25	12	1.10526	2	1.016	AGAUAAUUUUUCAUUUCUAAAAACUUUUUUUGAAUU
MMP0089	1	-	100124	Primary	6	9	1.37498	48	1.5647	AAACUUAUUGAAAAACAUAGGUGAAUCUAUGUUGG
MMP0091	5	-	101827	Primary	11	95	1.33569	515	1.26963	GUGGAAAACUACCCACUAAUCUCUUUUUUUGGUGU
		-	101750	Secondary	88	12	1.35293	16	1.11347	UUGGAGGAGUUUCAAUACAUGUUGAAAAUUUAAUAA
		-	101758	Secondary	80	9	1.17307	28	1.14213	UCCAUUUAUUGGAGGAGUUUCAAUACAUGUUGAAAA
		-	101779	Secondary	59	33	1.39285	248	1.46011	AUUACUUCCCUCCAUAUAUUAUCCAUUUAUUGGAGG
		-	101782	Secondary	56	33	1.2619	235	1.24227	AAUAUUACUUCCCUCCAUAUAUUAUCCAUUUAUUGG
MMP0092	5	-	102506	Primary	17	139	1.27308	110	1.12168	UAAAUUCAAAUAACGCUUUUCUACCAUUUUAUUAU
		-	102387	Secondary	136	11	1.23404	69	1.22258	AGAGGGGCAUGAACAAAAUAAACGAGAGUUUGAAGA
		-	102421	Secondary	102	10	1.18868	76	1.20213	UUUAAUUUUCAACAUUGAUAGGUGUGAGUAUGAGAG
		-	102467	Secondary	56	8	1.11428	0	1	ACCAAUUAGUUUUUUAUUAAAUUAACUCGAUAUUAA
		-	102484	Secondary	39	82	1.33198	50	1.07634	UACCAUUUUAUUAUUAAACCAAUUAGUUUUUUAUUA
MMP0093	5	-	102873	Primary	22	440	1.67901	173	1.27287	AAUUAUAAUUAUUUUAGAUAUCUUUUUUUUAGACU
		-	102799	Secondary	96	13	1.11111	25	1.07205	UAUUUCCGAAAAAUACACAACAAUUGCUCAUGCAAC
		-	102857	Secondary	38	79	1.54109	30	1.09009	AGAUAUCUUUUUUUUAGACUAAUCUGUUUUUGAGGG
		-	102863	Secondary	32	44	1.17187	6	1.01554	UAUUUUAGAUAUCUUUUUUUUAGACUAAUCUGUUUU
		-	102867	Secondary	28	43	1.1261	11	1.02625	UAAUUAUUUUAGAUAUCUUUUUUUUAGACUAAUCUG
MMP0094	3	-	103224	Primary	50	15	1.23809	32	1.11034	GGUAGUGAAAAAAAGGAUAGACACUAUGCCAAUUA
		-	103187	Secondary	87	13	1.27083	90	1.44117	GUUCAUGAAACACAUUAGGAGGAAUAACUAUGCAAA
		-	103264	Secondary	10	10	1.10204	15	1.04532	GAAGAUGCAGAAAAUAUCUAAAAUAGAAAUGGUUAU
MMP0095	3	+	105953	Primary	61	20	1.37036	19	1.13103	AAAGCCUUUUAAUUCCUUCAACUAUUUUUUCGUCA
		+	105913	Secondary	21	13	1.11304	7	1.03415	AAAAAAAUAAAAUUAAUUUAAAUAUUCUUUUAAAAC
		+	105922	Secondary	30	11	1.11579	4	1.02094	AAAUUAAUUUAAAUAUUCUUUUAAAACUUUUGAAAG
MMP0096	1	-	105883	Primary	12	12	1.18461	14	1.11864	AAAGAAUAUUUAAAUUAAUUUUAUUUUUUUACCCA
MMP0098	4	-	107759	Primary	27	971	2.90019	632	1.94469	UAAUUUAUUUUAACCUUUUAAUCUAUUUUUAAAUU
		-	107629	Secondary	157	6	1.99983	7	1.09859	UUUUUUAAGGAAAUAAUCAAUUUCUCCUAUUGAAAU
		-	107654	Secondary	132	25	2.19042	26	1.325	UGGCAUUAAACCUGAUUGUAUCAUUUUUUUUAAGGA
		-	107748	Secondary	38	96	1.66666	3	1.01478	UAACCUUUUAAUCUAUUUUUAAAUUACUCGUAAUGA
MMP0100	2	-	109266	Primary	31	69	1.87341	28	1.31111	UCUAUUUUUAUUCUUUUUUUAUUUUUUUAUCGCGA
		-	109262	Secondary	35	13	1.30952	1	1.01191	AUUUUUAUUCUUUUUUUAUUUUUUUAUCGCGAUAUA
MMP0102	1	+	111759	Primary	57	14	2.39986	7	1.38887	AUUAAAAAAUCAACAUACUUUUUUAUAUUUGAAAA
MMP0103	4	+	112903	Primary	183	11453	1.514	2704	1.22395	AAUUGCCUCGGUGGCUCAGCCUGGUAGAGCGCCUG
		+	112751	Secondary	31	78	1.33476	48	1.15047	UUUUGCUUAAACUUACCUAAAUUUUUAUUUUAAUUU
		+	112756	Secondary	36	23	1.13218	14	1.05036	CUUAAACUUACCUAAAUUUUUAUUUUAAUUUGGAUU
		+	112777	Secondary	57	46	2.06974	42	1.27814	AUUUUAAUUUGGAUUUUUAUAAUAUCUUUUUAAAAC
MMP0104	2	+	114416	Primary	52	10	1.5882	4	1.0404	UCCACUAUUAACAUUUAUAUAUUACUUUCUCAGAU
		+	114550	Secondary	186	6	1.125	0	1	UAUCUAGAGAGCAUAUAUUUAUUUCCGCUUUAUCUU
MMP0105	3	+	115028	Primary	14	96	1.76799	34	1.14719	AAAACUUGGGAAUUAAUCUUUUAUUUUUUUAUUGG
		+	115031	Secondary	17	32	1.41025	13	1.065	AACUUGGGAAUUAAUCUUUUAUUUUUUUAUUGGGUU
		+	115084	Secondary	70	10	1.33332	10	1.08547	UUUAAUGACAUUAUUAUAUACUUUAUAUUUCAGAAG
MMP0107	1	+	116250	Primary	39	7	1.87489	14	1.1647	UACAUAUUUUUAUUAUUUUAUAUCUUUUUUAGAUA
MMP0108	1	+	117403	Primary	20	10	2.11099	31	1.31313	UACAGAAUAAUUUUUUUACUUAUUUUUUUUCAGGU
MMP0110	1	+	120016	Primary	25	6	1.33332	3	1.04225	UUUAAUUAUUAACUUAUUUUUAAAAUUUUUAGGUA
MMP0112	1	-	120506	Primary	36	14	2.39986	3	1.08571	UAUGCCCAAUUUAUACUCCCAUCUUGUUUUAUCAA
MMP0115	3	+	124108	Primary	87	24	1.42104	15	1.14423	AAUCAUUACUUUUUUAUCCCAUCAAGUUUUAAUUU
		+	124115	Secondary	94	18	1.81814	11	1.21568	UACUUUUUUAUCCCAUCAAGUUUUAAUUUAUACAGC
		+	124121	Secondary	100	7	7.99301	1	1.05263	UUUAUCCCAUCAAGUUUUAAUUUAUACAGCAAAAUU
MMP0116	2	+	125221	Primary	36	21	1.2	23	1.29114	UUUUAAAAAUAUUUUAUUUAUUUUCUUAUUACAUU
		+	125233	Secondary	48	13	1.16049	3	1.04348	UUUUAUUUAUUUUCUUAUUACAUUAAAUCUUCCGGC
MMP0123	4	+	130258	Primary	22	147	2.58063	42	1.42857	UUAAAUAAUUUUUUUAUUUUUUUUAUUUUCAGUUG
		+	130269	Secondary	33	12	1.22641	3	1.04054	UUUUUAUUUUUUUUAUUUUCAGUUGUUAUGCGAGUU
		+	130332	Secondary	96	16	1.48483	14	1.23728	AGAUUGCUAUUGCAAAAUAACCUUCUUUUUUAUGAA
		+	130334	Secondary	98	7	1.29165	3	1.05357	AUUGCUAUUGCAAAAUAACCUUCUUUUUUAUGAAAU
MMP0125	2	-	130862	Primary	117	27	1.96425	8	1.08989	AUUUAUUUCUUCCCCAGAACAGAUUUUUUUAUUGG
		-	130944	Secondary	35	9	1.14754	9	1.08257	GCCAAAAAGAGGCAGGUGCUUCUUUUGGUGGUUAAA
MMP0127	2	-	133593	Primary	32	193	1.83189	552	2.1948	AUUACUAAAACAUAUUUCUUUUUUAAUUUUCAGCG
		-	133587	Secondary	38	29	3.63612	1	1.00394	UAAAACAUAUUUCUUUUUUAAUUUUCAGCGUAAUUU
MMP0128	1	-	134963	Primary	33	9	1.81811	5	1.33331	UACCUUUUUUUAAUUUAUUUUUCGAUUUUUCAAAA
MMP0130	1	+	137203	Primary	43	28	2.27267	4	1.15384	AUUAUAUCAUUACAAAAAAUCUCUUUUUUUAAAUA
MMP0132	1	+	139417	Primary	45	83	1.32806	22	1.05405	UAUUUUAAAAAACUAUUUUUAAACUUUUUUCAAAG
MMP0133	2	-	139419	Primary	26	226	2.04629	269	1.56159	AUAAUUCUCUUUUUUAUUUUUUAUUUCUUUGAAAA
		-	139355	Secondary	90	25	1.14706	74	1.27924	UUAAAAAAUAAUAUUACUCGAUAUAUUUUUUACCGA
MMP0134	4	+	141453	Primary	112	57	1.28079	154	1.34763	GGUAUAUAGCUAAUAAUUAGAUUCCCCAAUUUCCC
		+	141456	Secondary	115	37	1.30833	65	1.34574	UAUAUAGCUAAUAAUUAGAUUCCCCAAUUUCCCUAU
		+	141460	Secondary	119	9	1.15254	17	1.26153	UAGCUAAUAAUUAGAUUCCCCAAUUUCCCUAUAUUA
		+	141464	Secondary	123	26	2.13039	15	1.37499	UAAUAAUUAGAUUCCCCAAUUUCCCUAUAUUAGUAU
MMP0135	3	+	143008	Primary	182	15	1.18987	9	1.09	GAAUUCCCUGAAAAAGCUACAGUUGGCGAUAUCAU
		+	142865	Secondary	39	6	1.15384	1	1.01124	GGUGGAAUUAUGAAAAAGACUGUCGAAGGCAAAGCA
		+	142900	Secondary	74	7	1.15555	12	1.14634	AUGGGUUUUUGGAGAUAACAUCGAUACUGAUGCAAU
MMP0136	4	+	143392	Primary	45	217	1.85433	53	1.35333	UUUUAUUUUAUUAUUUUUUACAUUAUUUUUCGGUG
		+	143396	Secondary	49	32	1.48484	-3	0.973215	UAUUUUAUUAUUUUUUACAUUAUUUUUCGGUGAUUU
		+	143400	Secondary	53	8	1.17391	0	1	UUAUUAUUUUUUACAUUAUUUUUCGGUGAUUUUUAU
		+	143402	Secondary	55	10	1.31249	14	1.2	AUUAUUUUUUACAUUAUUUUUCGGUGAUUUUUAUGU
MMP0137	3	+	144442	Primary	31	26	1.83868	49	1.44954	AAUCACAAAAUACAAUUUUUAAAAUUUUUUGAAAA
		+	144452	Secondary	41	6	1.19354	-1	0.989474	AUACAAUUUUUAAAAUUUUUUGAAAAAAGCUCUUUU
		+	144576	Secondary	165	7	1.87489	6	1.1	CACUUUCUAAGAUGUGCAACUAUCGCACAUUACACU
MMP0139	1	+	148259	Primary	40	21	2.61526	84	1.40975	AGGUAUGCCUAAUUUCUUUUUUCUUUUUUUAAAAU
MMP0141	3	-	150596	Primary	33	71	3.02851	54	1.52427	AUUUCUUUUUUUUUAAUUAUCGAUUUUUUUGGUGA
		-	150587	Secondary	42	8	1.66661	0	1	UUUUUUAAUUAUCGAUUUUUUUGGUGAAGUUUCAAU
		-	150605	Secondary	24	58	1.24681	68	1.19883	AAAAUAAAAUAUUUCUUUUUUUUUAAUUAUCGAUUU
MMP0144	1	-	154179	Primary	19	17	2.2142	184	1.68148	UCGUUGAAUAAAUUAAUAUUUUUUAUUUUUGUGAU
MMP0148	3	+	159974	Primary	43	57	1.57575	4	1.10526	UUUUUUUCUUUUUUUAAGUUUUAAUUUUUUCUGUA
		+	159966	Secondary	35	32	1.16931	2	1.04651	AUUUUUUCUUUUUUUUCUUUUUUUAAGUUUUAAUUU
		+	160113	Secondary	182	12	1.23999	2	1.03921	UCAUUAUCUUUUAAAACAUCUACAAUUUUUUCAAAU
MMP0151	7	+	161769	Primary	19	919	1.56798	923	1.36353	CGCUUUUUUAACGAAUUAUUUUUCAAGUUUAACGA
		+	161774	Secondary	24	168	1.2383	186	1.12149	GGCAUAAUCCAUUACUUUUCUUUUUUGGUUUAAAUU
		+	161780	Secondary	30	89	1.16421	53	1.05101	AUCCAUUACUUUUCUUUUUUGGUUUAAAUUUAUAUU
		+	161792	Secondary	42	105	1.34091	101	1.14449	UCUUUUUUGGUUUAAAUUUAUAUUCUAUUUUGUAAA
		+	161806	Secondary	56	38	1.21714	30	1.05405	AAUUUAUAUUCUAUUUUGUAAAAUCGCUUUUUUAAC
		+	161822	Secondary	72	16	1.21621	23	1.05779	UGUAAAAUCGCUUUUUUAACGAAUUAUUUUUCAAGU
		+	161829	Secondary	79	13	1.24074	24	1.06916	UCGCUUUUUUAACGAAUUAUUUUUCAAGUUUAACGA
MMP0152	3	+	163489	Primary	17	36	2.16125	206	1.29855	AUGGCCAUUUUAAUUCUAUUUUUUUUUAUUGAUUU
		+	163486	Secondary	14	10	1.13513	117	1.12175	UGAUAUGGCCAUUUUAAUUCUAUUUUUUUUUAUUGA
		+	163494	Secondary	22	8	1.42103	119	1.22623	CCAUUUUAAUUCUAUUUUUUUUUAUUGAUUUUAUUG
MMP0153	1	-	163911	Primary	14	17	2.06243	3	1.01948	AAAAAUCAUAAAAUAACUUAAAACUUUUUUAAGGU
MMP0155	7	+	167318	Primary	58	98	1.4	47	1.11353	UAACCUUUUUUUCAUUUUUUACUCAUUUUUAUAUU
		+	167320	Secondary	60	25	1.12563	31	1.08424	AACCUUUUUUUCAUUUUUUACUCAUUUUUAUAUUAC
		+	167323	Secondary	63	35	1.23333	42	1.13548	CUUUUUUUCAUUUUUUACUCAUUUUUAUAUUACUUG
		+	167327	Secondary	67	32	1.35555	42	1.18341	UUUUCAUUUUUUACUCAUUUUUAUAUUACUUGGAAU
		+	167334	Secondary	74	8	1.1194	9	1.04545	UUUUUACUCAUUUUUAUAUUACUUGGAAUCAGGGAA
		+	167342	Secondary	82	6	1.12	9	1.04972	CAUUUUUAUAUUACUUGGAAUCAGGGAAAGUAAUAU
		+	167365	Secondary	105	6	1.15	-1	0.993865	GGGAAAGUAAUAUAUAUGGGGUGCAAUUAUUAUAAU
MMP0156	1	+	168058	Primary	143	16	1.14035	27	1.05973	AGAGACAGAUGCAAGAGCAGCAAAUGCAGUACGAA
MMP0157	1	+	168387	Primary	87	11	1.1028	25	1.07837	UCUGCCAUAAUUUUGCAUAAUCUGGGCUAUGACAU
MMP0158	1	+	169092	Primary	20	1680	1.73203	1288	1.4044	UAAAAAAUAAUUAAAAUAUCUUCUUUUUUUAAUCA
MMP0159	4	+	169152	Primary	80	24	1.13953	35	1.06542	CAAAAAAAUUAAAAAAGUAAUUUAAUUCACGUUUC
		+	169095	Secondary	23	324	1.3375	250	1.14124	AAAAAUAAUUAAAAUAUCUUCUUUUUUUAAUCAAGU
		+	169100	Secondary	28	219	1.4269	53	1.04549	UAAUUAAAAUAUCUUCUUUUUUUAAUCAAGUUCAAA
		+	169166	Secondary	94	19	1.14615	13	1.02642	AAAGUAAUUUAAUUCACGUUUCUUAAGUCUUUUACA
MMP0162	1	+	172156	Primary	150	51	1.74999	25	1.22727	GAAAAUGGAACCAAGUACAUCAUGUUUGGUGGAAA
MMP0163	2	+	173135	Primary	31	357	1.61979	166	1.21813	UAAAUAAAAUACUUUUUUUUAUUUUUUUUAAAAUU
		+	173147	Secondary	43	41	1.10594	8	1.01258	CUUUUUUUUAUUUUUUUUAAAAUUAAAAGAUUAAAU
MMP0164	1	-	173076	Primary	76	187	1.37177	205	1.35103	AUUAAGCUACAAUUACUUCUUUUUCUUCUUCGGAU
MMP0170	2	+	179418	Primary	40	6	1.23999	1	1.05	AAGUGUUUGAAUCUCUUUUAAUUUCUUUUUCAUUC
		+	179450	Secondary	72	6	1.31577	0	1	AUUCGUUUUACUUUCUUUAAUAUUAAUUUUUAAGGA
MMP0173	1	+	181790	Primary	91	12	1.18182	5	1.05435	UGUCAACAAGACCACAAAAUAUUAAUUUUUGAAGU
MMP0174	2	-	181549	Primary	147	11	1.45831	33	1.22603	AAUUUAACGCCAUCUCUAUCAUAUUUUUUUAUCAG
		-	181601	Secondary	95	10	1.15151	1	1.0049	AUUCUAAAUUAAUAAUCUCUUUUAAACUCUUUCCGA
MMP0176	3	-	183658	Primary	46	95	1.56547	79	1.37089	AUAUCAUUUUAAUUUUCAUUUAUUAGUUUUAAAAC
		-	183645	Secondary	59	34	1.30357	11	1.07483	UUUUCAUUUAUUAGUUUUAAAACAAUUUUUUUAAUG
		-	183664	Secondary	40	70	1.24823	57	1.17757	UGAUUUAAUAUCAUUUUAAUUUUCAUUUAUUAGUUU
MMP0178	1	-	186676	Primary	2	7	7001	0	1	AAAUGCGGUUGAAUAUUUCAAUAAAUAAUUAAAAA
MMP0180	3	-	190614	Primary	27	36	1.57142	21	1.26582	UAAAUUACUUUUUUCAUAAUUCUUAAUUUUAAAAG
		-	190553	Secondary	88	18	2.63621	12	1.42856	AUUUAUUUAAACCUUGAAUUCAUCUAGUUUUAUUAU
		-	190605	Secondary	36	8	1.20512	3	1.05882	UUUUUUCAUAAUUCUUAAUUUUAAAAGAUUUUAAAA
MMP0181	3	-	191187	Primary	53	218	2.1978	76	1.65517	AAAAUAUUGUUUUAUUUUUUUUAUUAUUUUACUUG
		-	191175	Secondary	65	17	2.13326	-1	0.976745	UUAUUUUUUUUAUUAUUUUACUUGUUUUCGUAACAU
		-	191178	Secondary	62	76	3.17137	31	1.63264	GUUUUAUUUUUUUUAUUAUUUUACUUGUUUUCGUAA
MMP0182	2	-	191969	Primary	55	47	1.90383	19	1.15702	CUAUUAAUUCUUUUUUAAGUUUACUUUUUUAAAAU
		-	191950	Secondary	74	11	1.52378	6	1.06522	GUUUACUUUUUUAAAAUUGAUUUUAAUUUUUAGAAG
MMP0183	5	-	192369	Primary	38	76	1.51351	54	1.16071	UUGAAUUCACUCGAAUUUAUCUUCUUUUUUAAAAA
		-	192338	Secondary	69	7	1.26922	7	1.0473	AAAAAUUUAUCCAUUAAUUGCUUUUUUUCGCCGAUU
		-	192341	Secondary	66	28	1.71793	53	1.28495	UUUAAAAAUUUAUCCAUUAAUUGCUUUUUUUCGCCG
		-	192343	Secondary	64	10	1.14084	7	1.02734	UUUUUAAAAAUUUAUCCAUUAAUUGCUUUUUUUCGC
		-	192361	Secondary	46	17	1.1619	6	1.01967	CACUCGAAUUUAUCUUCUUUUUUAAAAAUUUAUCCA
MMP0186	5	+	195238	Primary	79	15	1.20548	6	1.04959	AAUUAAAAAUCAGUUAUAUUUUAUCUUUUUCCAAG
		+	195175	Secondary	16	9	1.10345	4	1.05128	GCAGUAAAUGAAUAAUUUUUUAUCUAUUUUUGUAAA
		+	195184	Secondary	25	12	1.16438	5	1.06944	GAAUAAUUUUUUAUCUAUUUUUGUAAAUUUUAAAAU
		+	195192	Secondary	33	11	1.19298	-1	0.986667	UUUUAUCUAUUUUUGUAAAUUUUAAAAUUUUAAUAA
		+	195328	Secondary	169	7	1.11475	6	1.04138	AUCUUUUGAAGGAAUUUCUUCUCUCAUUUUUCUUGG
MMP0187	3	-	195193	Primary	36	11	1.17187	15	1.14706	ACUGAUUUUUAAUUUUUUUUAACUUUUAUUAAAAU
		-	195185	Secondary	44	8	1.17777	-5	0.93976	UUUAAUUUUUUUUAACUUUUAUUAAAAUUUUAAAAU
		-	195196	Secondary	33	11	1.12644	7	1.05109	UAUAACUGAUUUUUAAUUUUUUUUAACUUUUAUUAA
MMP0188	2	+	197700	Primary	3	314	1.45772	129	1.22711	UCGAGGGUUCAAAUCCCUUUCCCUCCACUUUUUGA
		+	197541	Secondary	13	23	1.49999	33	1.34736	GAAAAUAAUUUCUACUAAAUUUUUUAAUUUUAAAUU
MMP0189	1	+	198553	Primary	144	58	2.87091	25	1.5319	UUCCCAAGGUAUUUCCCACCUUUGGGCAAAUAUAA
MMP0190	1	-	198616	Primary	30	6	1.27272	11	1.17187	UAAGGUACAUCUCUCUCUUUUUUCUUUUUUAACCC
MMP0192	1	+	201933	Primary	19	11	2.37483	143	2.29999	AAUGCGAUUAAAUUCUUUUUUUAAUUUUUUAAAUA
MMP0194	5	+	203390	Primary	58	51	1.30723	17	1.10759	UUUAAAUUCAAAUAUUUUUUAUUUAUUUUUUAAUU
		+	203398	Secondary	66	47	1.73436	38	1.48717	UCAAAUAUUUUUUAUUUAUUUUUUAAUUUUUAAAAU
		+	203404	Secondary	72	8	1.2857	5	1.13888	AUUUUUUAUUUAUUUUUUAAUUUUUAAAAUCAUUAA
		+	203407	Secondary	75	6	1.42854	0	1	UUUUAUUUAUUUUUUAAUUUUUAAAAUCAUUAAGCU
		+	203430	Secondary	98	7	7.99301	6	1.37498	AAAUCAUUAAGCUUUAAUUUUUAAUUUUUUUAAAUA
MMP0204	1	+	212038	Primary	37	47	2.95825	50	1.37037	AUAUAAAUAUACUACUUUUUUUUAUUUUUAAACGA
MMP0205	3	+	213403	Primary	72	59	1.73749	28	1.33735	UUAAAAAUUUCUUUUAUAUCUACAUUUUUUGUAGU
		+	213412	Secondary	81	6	1.125	9	1.17307	UUCUUUUAUAUCUACAUUUUUUGUAGUUAUUUUUGG
		+	213415	Secondary	84	17	1.62961	7	1.16666	UUUUAUAUCUACAUUUUUUGUAGUUAUUUUUGGAGU
MMP0209	1	-	216519	Primary	40	8	1.34781	5	1.23808	AUAAAUUAAUUUUUCGAUAUUUUUUGUUUUAACGA
MMP0210	1	+	218172	Primary	22	8	1.38093	1	1.12498	GAGACUAGUAUCUUUUAUUUUUAACUUUUUUAUCU
MMP0212	4	-	218848	Primary	68	106	2.04949	42	1.60869	AAAUUUUUAACAUCCAAAUUAUAAUUUUUUGAAAC
		-	218807	Secondary	109	7	1.30434	2	1.02564	UUGGAAUAUCUAAAAAUCCAGUUACAUUUUUAAUUA
		-	218836	Secondary	80	10	1.28571	6	1.13636	AUCCAAAUUAUAAUUUUUUGAAACAAUUUUUGGAAU
		-	218839	Secondary	77	10	1.18868	-1	0.98077	AACAUCCAAAUUAUAAUUUUUUGAAACAAUUUUUGG
MMP0214	1	-	221514	Primary	31	9	1.56246	10	1.47617	UAGUGAAAAAAUGAAAGCAUUUGACAUAAUGAAAG
MMP0215	6	+	222651	Primary	29	34	1.73911	7	1.12069	AUAUUUUUUUAUUUUAUUAACUCUUAUUUUAAAAU
		+	222636	Secondary	14	18	1.13235	3	1.03614	UAAAACAUAAAAAAUAAUAUUUUUUUAUUUUAUUAA
		+	222639	Secondary	17	18	1.15929	4	1.05195	AACAUAAAAAAUAAUAUUUUUUUAUUUUAUUAACUC
		+	222646	Secondary	24	11	1.11828	5	1.07353	AAAAUAAUAUUUUUUUAUUUUAUUAACUCUUAUUUU
		+	222649	Secondary	27	10	1.12346	0	1	AUAAUAUUUUUUUAUUUUAUUAACUCUUAUUUUAAA
		+	222659	Secondary	37	13	1.64997	7	1.15555	UUUAUUUUAUUAACUCUUAUUUUAAAAUUCUAACUG
MMP0219	1	+	227262	Primary	45	34	1.89471	27	1.35526	UAAAAUUUUAUACAUUUUUUACUCUUUUCUCAAAA
MMP0220	3	+	228870	Primary	37	14	1.93327	9	1.16071	UAAUAAUUUUUAUUCCAUUUCGUAAUUUUUAGAGA
		+	228851	Secondary	18	6	1.11111	10	1.09709	CAAUAAAAAAUAACUUUUUUUAAUAAUUUUUAUUCC
		+	228903	Secondary	70	7	4.49825	4	1.15384	AGACUUUUGAAUGAUUUUUCCCAAAUUUUUUAAGUA
MMP0221	2	+	230579	Primary	70	103	3.28884	42	1.50602	CAAUCAUAUUUAAAAUAAUUUUUUUAUUUUGGGGU
		+	230589	Secondary	80	7	1.38887	0	1	UUAAAAUAAUUUUUUUAUUUUGGGGUACUAUGCAUU
MMP0222	1	+	230856	Primary	29	10	1.45453	2	1.02273	GGUGUAAUUUAUGAAAUUAGACGCAAAAGUUUCAA
MMP0224	2	+	232431	Primary	23	59	1.65555	32	1.23021	AUUGUAAAUUUUCUUCUUUUUUAAUUUUUAAAAAU
		+	232475	Secondary	67	16	1.2807	3	1.02113	AUUAAAAUAAAUUAAAUGAUUUCAGAUUUUUCAAGA
MMP0227	4	-	234254	Primary	55	17	1.51514	174	2.19999	AUUUCAUUUUUUGUUCUUUUUUUAAGUUUUAUCAU
		-	234247	Secondary	62	7	1.38887	7	1.05932	UUUUUUGUUCUUUUUUUAAGUUUUAUCAUUUAAUUU
		-	234261	Secondary	48	16	1.28571	60	1.15504	UUAUUUUAAUUUCAUUUUUUGUUCUUUUUUUAAGUU
		-	234273	Secondary	36	13	1.12621	11	1.0224	UUUAAAUAUUUUUUAUUUUAAUUUCAUUUUUUGUUC
MMP0228	2	+	237999	Primary	26	11	1.11579	3	1.03061	UUAAUUUAUUUUUAUGUUAUAUCUAUUUUUAAAAU
		+	238057	Secondary	84	10	1.11494	5	1.05263	UUCCAAAGAAGUUUUUCGUUCUUUCAUUUUUAGGAU
MMP0229	1	-	237961	Primary	46	62	2.06895	35	1.42682	UAUAACAUAAAAAUAAAUUAAUAUUUUUUUGAAUG
MMP0230	2	-	238755	Primary	24	17	1.94439	9	1.24324	GAAUAAUUAAUUUAUUUUACUUUUAACUUUGAAAA
		-	238745	Secondary	34	6	1.74991	-1	0.972223	AUUUAUUUUACUUUUAACUUUGAAAACAGGUGGAAA
MMP0233	1	+	241456	Primary	95	10	1.3846	8	1.18604	AAUAUAUUUAAUAUCCAUAUUUAUUAUUUCAUUGU
MMP0234	5	+	242678	Primary	43	71	1.51824	12	1.10435	UAUAAAAUAUUUAACUAUUUUUUUAUUUUUAAUAU
		+	242684	Secondary	49	18	1.29032	10	1.10638	AAUAUUUAACUAUUUUUUUAUUUUUAAUAUCAAUAA
		+	242687	Secondary	52	7	1.13725	0	1	AUUUAACUAUUUUUUUAUUUUUAAUAUCAAUAAUUC
		+	242697	Secondary	62	7	1.18421	4	1.04878	UUUUUUAUUUUUAAUAUCAAUAAUUCCAAAUGCACA
		+	242706	Secondary	71	8	1.27585	3	1.03846	UUUAAUAUCAAUAAUUCCAAAUGCACAUUCUGAAAC
MMP0235	4	+	243548	Primary	20	230	2.63119	70	1.45751	GAUGCUUUAAACUACCUAUUUUUAAUUUUUGAGGA
		+	243557	Secondary	29	22	1.23913	4	1.02614	AAACUACCUAUUUUUAAUUUUUGAGGAAUGUUAAAA
		+	243654	Secondary	126	6	1.10909	6	1.04054	UGUUGUAUCUACAAUGACUCCAGGAAUUUUUGGAUU
		+	243683	Secondary	155	7	1.13461	24	1.2	UUGGAUUGAAUAAAUCUGUAGAGUUAUCUUCUGCAA
MMP0237	4	+	244511	Primary	118	17	1.54837	15	1.18293	CCUGGAUUUUAAUAUUGUUUUUAUUGUUUUCAUCA
		+	244413	Secondary	20	15	1.10067	3	1.01068	AUAUCCGCUAAAUUUUAAUUUUCUAACUUUUAUUUA
		+	244497	Secondary	104	16	1.20779	16	1.09195	UAUUUAAAUCCAUAUCCUGGAUUUUAAUAUUGUUUU
		+	244502	Secondary	109	7	1.10937	13	1.09848	AAAUCCAUAUCCUGGAUUUUAAUAUUGUUUUUAUUG
MMP0239	1	+	245811	Primary	22	6	1.66659	22	1.32835	CCCAGUAGUGGUGUUUUUAUGAUAUUUGAUAGCGA
MMP0241	4	+	248202	Primary	102	50	1.39682	40	1.13423	AAUAAUUUUCCAUUUUUCCAUUAAAUUUUUCGCGU
		+	248209	Secondary	109	9	1.10714	2	1.00738	UUUCCAUUUUUCCAUUAAAUUUUUCGCGUUUGUUUA
		+	248247	Secondary	147	7	1.10294	-2	0.991803	AUAACUGCAUUUGGUUUUUCUUUUAACAUUUCUUCA
		+	248250	Secondary	150	10	1.18868	6	1.0249	ACUGCAUUUGGUUUUUCUUUUAACAUUUCUUCAAGA
MMP0245	3	-	249779	Primary	26	326	2.46188	760	1.85586	AUAAAUUAAUUUUUUACUAUACUCUUUUUUAAGGU
		-	249769	Secondary	36	7	1.12281	-1	0.997613	UUUUUUACUAUACUCUUUUUUAAGGUCUGUUUAUGA
		-	249774	Secondary	31	26	1.27368	-10	0.982699	AUUAAUUUUUUACUAUACUCUUUUUUAAGGUCUGUU
MMP0247	2	-	250381	Primary	82	8	1.38093	3	1.02632	AAAAAAGCCAGAAUUAUUUAUGAAUCUGCUUAUCC
		-	250384	Secondary	79	7	1.19444	8	1.06957	UCCAAAAAAAGCCAGAAUUAUUUAUGAAUCUGCUUA
MMP0248	1	-	250766	Primary	191	30	1.34091	47	1.20259	AACCCUGGAAGGCUCAAAAUAUUUAAUUUUGAAAA
MMP0249	8	-	251109	Primary	43	232	1.62533	59	1.22605	AAACCAUUUAUUUUUCAUUUUAAGCUUUUUUAGGU
		-	250958	Secondary	194	7	1.14583	5	1.02994	CUAAAAUAGUUAAAAAAGUUCAGGCAAGAUAAUGAU
		-	251086	Secondary	66	9	1.23076	8	1.05229	AGCUUUUUUAGGUGAUAUUAUGGCAGAGUACAAAUG
		-	251096	Secondary	56	12	1.27272	10	1.07752	UUUCAUUUUAAGCUUUUUUAGGUGAUAUUAUGGCAG
		-	251099	Secondary	53	44	1.68749	34	1.22368	AUUUUUCAUUUUAAGCUUUUUUAGGUGAUAUUAUGG
		-	251101	Secondary	51	25	1.22321	0	1	UUAUUUUUCAUUUUAAGCUUUUUUAGGUGAUAUUAU
		-	251104	Secondary	48	46	1.32168	-5	0.973404	CAUUUAUUUUUCAUUUUAAGCUUUUUUAGGUGAUAU
		-	251118	Secondary	34	211	1.25119	69	1.16468	AAUUAUUUUUAAACCAUUUAUUUUUCAUUUUAAGCU
MMP0250	3	-	251393	Primary	79	37	1.42045	79	1.27241	UAAAAAAAUUGGUUCAGCAGGAAGAUUUGGAUCAA
		-	251276	Secondary	196	11	1.11458	4	1.01619	UCCCUAAAUUAAAAAGAGCAGGAACCUCUAUCUGGG
		-	251369	Secondary	103	13	1.16883	55	1.22634	GAUUUGGAUCAAGAUACGGUAGAAAAAUCAGAGUAA
MMP0252	2	+	253592	Primary	69	412	1.6983	582	1.8484	AUUUUUUUCUAUUUUUUAUUAUUUUAUUUUGUUAU
		+	253587	Secondary	64	346	1.28501	334	1.20516	UACCUUAUUUUUUUCUAUUUUUUAUUAUUUUAUUUU
MMP0254	1	+	257411	Primary	51	6	1.31577	2	1.03279	UGGAAAAUGAUGUAUUUAAGGCAGAUAUGCACAUA
MMP0256	4	-	258241	Primary	75	37	1.2327	37	1.08852	UCUUGAAUUACUUCUUUUAAUUUCUGUUUUGCUUU
		-	258136	Secondary	180	9	1.13043	78	1.49681	GCCAAAUGCGGCAAUGCCUUUUUUAAAUUUUGAACA
		-	258230	Secondary	86	21	1.21	20	1.06042	CUUCUUUUAAUUUCUGUUUUGCUUUCUUUUUAAGAU
		-	258246	Secondary	70	29	1.14356	27	1.05882	AUAACUUCUUGAAUUACUUCUUUUAAUUUCUGUUUU
MMP0258	3	-	259589	Primary	27	1915	1.61437	2054	1.23272	UAAUUACUUUUCCGAAUACUCUCUUUUUAUUUUAG
		-	259576	Secondary	40	16	4.19936	954	2.59265	CGAAUACUCUCUUUUUAUUUUAGGCAUAUAUAUUUG
		-	259581	Secondary	35	338	2.56481	25	1.00924	UUUUCCGAAUACUCUCUUUUUAUUUUAGGCAUAUAU
MMP0259	2	-	259899	Primary	104	9	1.10588	4	1.01878	GGAGGUGUACUUUAUGGAAUACAUAUACGCAGCAU
		-	259836	Secondary	167	8	1.15094	-2	0.989796	UCACAGAAGACGCUGUUAAAGCUAUAUUAGUAGCUG
MMP0260	3	-	260928	Primary	96	20	1.18348	23	1.05665	UAAUGCAUUAAAAGAAUUACUUAAAAGUUCAAACA
		-	260901	Secondary	123	10	1.11236	72	1.24161	GUUCAAACAUUAUUGCAUUAAUUGACAUGAUGGAAG
		-	260974	Secondary	50	19	1.1338	26	1.06005	GAAGCUAAAUCAGAACAUAAGAUUGCCCCUUGGAAA
MMP0261	2	-	261811	Primary	33	67	1.64423	30	1.3125	AUAUUUUAUAUCGGCAUAAUUUAUUUUUUUAACUU
		-	261790	Secondary	54	16	1.42104	5	1.09615	UUAUUUUUUUAACUUGUAAAACCUUAUUUUUAACUU
MMP0263	1	+	264952	Primary	125	17	2.13326	42	2.5555	UUCUUUGGAAAAGUAAUGUACAUAUUUUUAAAUAA
MMP0264	1	+	265924	Primary	24	34	1.84998	20	1.48779	GAAUAAUUAGAUUUUAUUUUUAUAUUUUUUAAGGG
MMP0266	2	-	266375	Primary	44	12	1.41378	12	1.21428	AAACUUUUUUAUUCUUUUUUUUAUGUUAUUUAAUC
		-	266381	Secondary	38	7	1.16666	6	1.07792	AUUUUUAAAACUUUUUUAUUCUUUUUUUUAUGUUAU
MMP0270	1	-	270025	Primary	57	18	1.5294	1	1.0625	AAACCAUAAAUUUCUUUUAUUUUAUUAUUUGCAUG
MMP0274	3	+	274295	Primary	47	33	1.62263	18	1.48647	AAAAAUCCAAAACUUACUUUUUUUAUAUUUAAAAU
		+	274289	Secondary	41	31	1.30392	18	1.26087	AAUAUCCAAAAAUCCAAAACUUACUUUUUUUAUAUU
		+	274311	Secondary	63	8	1.39998	0	1	ACUUUUUUUAUAUUUAAAAUUCGGCUUUUUUCAAAC
MMP0276	2	-	277177	Primary	26	12	1.5714	9	1.24324	UUAAUUCUUUUUUUAAUUUAUUAAAUUUUUAAGCU
		-	277185	Secondary	18	9	1.21428	3	1.06383	AAAAAUAAUUUAAUUCUUUUUUUAAUUUAUUAAAUU
MMP0277	3	-	278294	Primary	73	26	1.81248	5	1.125	UAAAAAUAAAAUACCCAAACUAUUUAUUUUGGCAU
		-	278324	Secondary	43	12	1.13953	2	1.04	UUCCAGAAAUCUAUUUUUUUAAUAGCUUUUUUAAAA
		-	278335	Secondary	32	12	1.10714	2	1.03636	GCGUUUGUAUUUUCCAGAAAUCUAUUUUUUUAAUAG
MMP0278	1	+	280213	Primary	167	7	1.26922	10	1.17241	AAGUAGCGAGAUAGAAAUAGAUUUUAGAAUUGAAA
MMP0280	4	+	281485	Primary	39	73	1.53284	36	1.13585	UAACUUAUUUUUUAAAUUUUAAAUAUUUUUUAUCG
		+	281492	Secondary	46	9	1.10112	0	1	AUUUUUUAAAUUUUAAAUAUUUUUUAUCGUUUUUAU
		+	281495	Secondary	49	25	1.55554	58	1.3841	UUUUAAAUUUUAAAUAUUUUUUAUCGUUUUUAUGGU
		+	281508	Secondary	62	9	1.99989	28	1.51851	AUAUUUUUUAUCGUUUUUAUGGUGAGACUAUGUCUA
MMP0281	1	+	283495	Primary	96	10	1.14285	6	1.07895	UAAAUUCAGCUAAUUUUUUUUCAAUUCUUUCAUCA
MMP0282	1	-	283366	Primary	35	20	1.38461	4	1.04762	AAUUCUACGUAAAUAUCUUUUCCUUUUUUCAUUGC
MMP0283	2	+	284520	Primary	35	12	1.19355	5	1.03268	AAAUAACCUCAUUUGGCCAUUUUUUAUUUUCAAGU
		+	284515	Secondary	30	11	1.14474	1	1.00617	AUUUUUAAAUAACCUCAUUUGGCCAUUUUUUAUUUU
MMP0284	1	+	286563	Primary	122	11	1.22449	5	1.03759	AAUUUAACUUAACUUAAUAAUUUUCUCUUUCGGAG
MMP0285	4	+	288095	Primary	59	28	1.23333	0	1	CAAGUUAUUGUGGCAUCCUGAUUAUAAUCCCGAAG
		+	288174	Secondary	138	17	1.14166	8	1.04188	AAAAUCAGUUCCUCUGAAAAAUAUCGUUAUUGAAGA
		+	288195	Secondary	159	20	1.22727	8	1.04324	UAUCGUUAUUGAAGACUCUUUUCUUGUUUUUGACGA
		+	288227	Secondary	191	12	1.26086	15	1.07979	ACGAAACACACAUUCCCUUUCACAGAAUUUUGGAGA
MMP0286	1	+	288286	Primary	10	6	1.19354	18	1.1125	UAAUUUACAAAAAAAGGUAGGGAUCAUGGUAUACG
MMP0287	3	+	289094	Primary	18	21	1.63634	11	1.0873	CUUGAGCUUUAAAUUUUAAUUAUUAAUUUUAAAUG
		+	289088	Secondary	12	13	1.20635	6	1.04196	AAAUAUCCUUGAGCUUUAAAUUUUAAUUAUUAAUUU
		+	289238	Secondary	162	8	1.25806	9	1.06383	UUUUUAGGAUACUCUGACUAUCUUUUAUUUUGGAGU
MMP0289	3	-	289850	Primary	26	57	1.87691	42	1.43749	AUAAAUACAAUAUUCCUUUUUUAUUUUUUACAGUG
		-	289837	Secondary	39	7	1.18918	3	1.04762	UUCCUUUUUUAUUUUUUACAGUGCUAUUUUUGAAAA
		-	289843	Secondary	33	9	1.19565	1	1.01191	ACAAUAUUCCUUUUUUAUUUUUUACAGUGCUAUUUU
MMP0290	6	+	291632	Primary	46	96	1.26891	19	1.05429	UUAUUGAAUAUUUUAUUUAUUUUUAUUUUUAAUUU
		+	291623	Secondary	37	63	1.1123	63	1.13235	AUUUUUUUAAUUAUUGAAUAUUUUAUUUAUUUUUAU
		+	291642	Secondary	56	72	1.68571	58	1.31016	AUUUUAUUUAUUUUUAUUUUUAAUUUUUUUCUAAGG
		+	291649	Secondary	63	7	1.16279	2	1.01852	UUAUUUUUAUUUUUAAUUUUUUUCUAAGGCCGGUGA
		+	291652	Secondary	66	7	1.21212	-3	0.972222	UUUUUAUUUUUAAUUUUUUUCUAAGGCCGGUGAGAG
		+	291721	Secondary	135	10	1.41665	8	1.10667	GAAAAAGGGCAUUUCAGAGUCUAAAAUUAUUGAAGA
MMP0291	2	+	293083	Primary	81	76	1.40641	123	1.33424	ACAAUAUUUAUGUCUACAUUUUUAUUUUUUAUAGA
		+	293197	Secondary	195	9	1.2	36	1.13636	UAUCAUUUCCAUAUCCAUAAUAUCACCUUUUAAGAU
MMP0292	1	-	292917	Primary	82	44	1.33846	33	1.11538	AUGUUUUUCUAACUUUUUCUUUCAUUUCUUCAAAG
MMP0294	4	+	295153	Primary	24	60	1.41379	23	1.16312	AAUUAAUAUUUCUUUAAUACCUUUUUUAUUACGUU
		+	295158	Secondary	29	19	1.19	1	1.00781	AAUAUUUCUUUAAUACCUUUUUUAUUACGUUCAAAA
		+	295207	Secondary	78	19	1.44185	16	1.16667	AGUAGCAUUUUUAUAUCUAUUUUUACUUAUUGUUUA
		+	295243	Secondary	114	8	1.5333	4	1.05333	UUGAGCGAUAAACAAUAUUCAGGAUUAUUUUGGUGG
MMP0295	2	+	296273	Primary	115	91	1.99999	56	1.16185	UCUUAUUUUAUUUCCUUCUUUUACAUUUUCAAUCG
		+	296282	Secondary	124	7	1.11475	-1	0.997015	UAUUUCCUUCUUUUACAUUUUCAAUCGUAUUAUUAU
MMP0297	4	-	297294	Primary	48	69	2.27775	178	1.3991	UUUUACUUAAUUAAUAGAUUUUACAUUUUUGGUGA
		-	297286	Secondary	56	10	1.35713	50	1.13298	UAAUUAAUAGAUUUUACAUUUUUGGUGAUAUUAUGA
		-	297313	Secondary	29	31	1.11698	14	1.01811	AAGUACUCUUUUUCUUCUUUUUUUACUUAAUUAAUA
		-	297317	Secondary	25	45	1.13393	38	1.04668	UUAUAAGUACUCUUUUUCUUCUUUUUUUACUUAAUU
MMP0298	5	+	298616	Primary	47	618	1.31807	1229	1.34945	UAAUUCUUUUAAUUAACUUUUUUAGUUUUUAUUUU
		+	298621	Secondary	52	451	1.42911	194	1.06894	UCUUUUAAUUAACUUUUUUAGUUUUUAUUUUACUCG
		+	298642	Secondary	73	64	1.10159	13	1.00616	UUUUUAUUUUACUCGAAUUUACUUGAUUUUUAUACG
		+	298668	Secondary	99	269	2.32512	742	1.6864	UUUUUAUACGACAAUUACUAUUUACUUUUUUAACAG
		+	298675	Secondary	106	26	1.2653	55	1.08006	ACGACAAUUACUAUUUACUUUUUUAACAGAGUUUUA
MMP0300	1	+	300695	Primary	181	6	1.33332	2	1.04444	UGUUUUUGAGGUUAUUUCAGAAGAUACUAUCUGUA
MMP0301	2	+	300929	Primary	35	22	2.04757	14	1.46665	UUUUAUACUUAUUCAAUUAGUUUUUAUUUUAACGU
		+	300924	Secondary	30	15	1.31914	1	1.02	AUUCUUUUUUAUACUUAUUCAAUUAGUUUUUAUUUU
MMP0302	4	+	301474	Primary	22	82	1.16633	45	1.09184	AAGCUUAAUUUUUUUUAUUUUUUUAUUUUUGUUCA
		+	301628	Secondary	176	44	1.30986	31	1.20946	CUGACAUAAUGAUUACCUCCCUUUCAAUAGGUUUAA
		+	301645	Secondary	193	37	1.6981	20	1.19802	UCCCUUUCAAUAGGUUUAAUUUGGAAUUAAUAAUUU
		+	301650	Secondary	198	6	1.15384	2	1.02198	UUCAAUAGGUUUAAUUUGGAAUUAAUAAUUUAUAUA
MMP0303	3	-	301432	Primary	35	100	1.25575	38	1.08154	UAAAAAAAAUUAAGCUUUAUUACUUUUUUUAACAU
		-	301413	Secondary	54	34	1.21656	33	1.1375	AUUACUUUUUUUAACAUAUUUUAUGUAUUUUGCAGC
		-	301422	Secondary	45	69	1.31651	74	1.22156	UUAAGCUUUAUUACUUUUUUUAACAUAUUUUAUGUA
MMP0309	4	+	306567	Primary	29	207	2.78447	118	1.55924	AUUUCUCUAUUUUUUGAUUUUACUUUUUUUAAUUA
		+	306575	Secondary	37	25	1.40983	-3	0.98125	UAUUUUUUGAUUUUACUUUUUUUAAUUAGUUUUACU
		+	306577	Secondary	39	9	1.18367	10	1.06896	UUUUUUGAUUUUACUUUUUUUAAUUAGUUUUACUCA
		+	306589	Secondary	51	15	1.83329	16	1.18182	ACUUUUUUUAAUUAGUUUUACUCAAAUUUUUAAGUC
MMP0311	1	+	307745	Primary	60	6	1.22221	8	1.1194	UAUUCAUAUUCCCAUCAAAUAGCCUUAUUUUGGCA
MMP0313	3	+	308642	Primary	32	94	2.04443	20	1.20618	AUAUUAUUUUUUUUAAUUUCGAUUAUUUUUGUGAA
		+	308626	Secondary	16	33	1.10891	7	1.04636	AUGUCAUUCUUUUAGAUAUAUUAUUUUUUUUAAUUU
		+	308683	Secondary	73	33	2.94106	18	1.33333	UCCCACUUUCUGCAAAAGUAUAUAUAUUUUUAAAAA
MMP0317	2	+	314151	Primary	36	425	2.91441	475	2.10209	CAUGAAUUACUAUUUUUUUAAUCAUUUUUUAAAAU
		+	314164	Secondary	49	27	1.17881	-28	0.87156	UUUUUUUAAUCAUUUUUUAAAAUUGAAAUGUAAAAU
MMP0318	2	-	314165	Primary	42	103	1.57865	110	1.44898	UAAAAUACUUUUUUUUAAAUUUUAGAUUUUACAUU
		-	314152	Secondary	55	18	1.12766	-130	0.645778	UUUUAAAUUUUAGAUUUUACAUUUCAAUUUUAAAAA
MMP0319	1	-	315906	Primary	31	8	1.57139	-2	0.931037	UUUCAUUAAUUUAUACAUCGAUACUUUUUUAUUUA
MMP0321	1	+	318348	Primary	176	6	1.49996	12	1.24489	AUCGGGUAAAACCACAUUAGCUUACGCGAUUGCAA
MMP0322	3	+	319655	Primary	22	24	1.26966	6	1.08219	UCUUUUAAAAAUUUAAGUUAAUUCUUUUUUAGUAU
		+	319663	Secondary	30	18	1.28125	11	1.18965	AAAAUUUAAGUUAAUUCUUUUUUAGUAUUUUAAAGU
		+	319691	Secondary	58	8	1.17391	4	1.07692	UUUAAAGUCAAUUACAAAUACGUAUUCUCUUGGGGA
MMP0325	3	-	321139	Primary	30	122	2.32607	41	1.44565	CUUAUUUAAAUCUGCUUUUUUACAUAUUUUAACAC
		-	321127	Secondary	42	13	1.9285	5	1.11628	CUGCUUUUUUACAUAUUUUAACACAAAUAUCAAACC
		-	321133	Secondary	36	10	1.20408	0	1	UUAAAUCUGCUUUUUUACAUAUUUUAACACAAAUAU
MMP0326	3	+	324442	Primary	53	48	1.87271	13	1.2549	UGUUAAAUUUCUUUUUUUAUAAAAUUUUUUAAAAA
		+	324453	Secondary	64	12	1.41378	5	1.14705	CUUUUUUUAUAAAAUUUUUUAAAAAAGUUUUUAUUU
		+	324459	Secondary	70	10	2.11099	1	1.0625	UUAUAAAAUUUUUUAAAAAAGUUUUUAUUUUAAGUU
MMP0327	2	+	326055	Primary	13	30	1.58822	17	1.26562	GAAUAAGUAAAUUCUAACUUUUAAUUUUUUAAUAU
		+	326097	Secondary	55	13	2.44428	7	1.21212	AAUUAAAUAGAAUUAUUCAUAGUUAUUUUUUACAAA
MMP0329	1	+	327273	Primary	10	6	1.49996	3	1.0566	UCAUACUUUCAGUUCUUUAAGUGAUAACAUGUUUA
MMP0330	1	+	328103	Primary	193	15	1.31914	6	1.07317	GCCAUCCAUUUCUAAUUUUUCAAGUUUUUUUACAA
MMP0331	1	-	327787	Primary	125	12	1.23529	25	1.22321	GGGAUUUUUGUCGUUCUUAAUAAUUCUUUUGAUUC
MMP0333	2	+	331418	Primary	24	25	1.32467	6	1.06061	CUUUAAAAUAAGCUGGCUUUUCUGUUUUUCGGGUG
		+	331454	Secondary	60	11	1.40739	13	1.19117	AGGUAAUAAUUAACUUAUUUUUUAAUUUUUUCAAAG
MMP0335	2	+	332816	Primary	73	221	2.34755	151	1.53546	UAUAUUACAUUUCAGAAUCCAACUUUUUUUGAAUA
		+	332841	Secondary	98	14	1.14894	9	1.04523	UUUUUUGAAUACUGUCUUCUGCAACAUCUUUAAUAU
MMP0339	1	+	335564	Primary	0	14111	4.59058	4895	2.49603	UCGGGGGUUCGAAUCCCUCCGGGUCCGCCAUUACU
MMP0341	5	+	339321	Primary	0	1126	9.10066	166	2.31745	UCGGGAGUUCGAAUCUCCCCGGACUCACCAUUUUU
		+	339231	Secondary	92	47	1.39166	55	1.16975	AAAAUAUAAAUACUAAAUAAAUUAUCUUUUUAUAGU
		+	339236	Secondary	97	6	1.13333	18	1.09783	AUAAAUACUAAAUAAAUUAUCUUUUUAUAGUGAUUA
		+	339239	Secondary	100	6	1.15384	4	1.02186	AAUACUAAAUAAAUUAUCUUUUUAUAGUGAUUAAGU
		+	339302	Secondary	163	130	1.11083	24	1.07742	CCGCCCUGACACGGCGGUGAUCGGGAGUUCGAAUCU
MMP0343	1	-	339804	Primary	63	9	1.39129	16	1.19047	UCCAAAUUCUCCCGAAAUUACUACUCUUUUAUCAU
MMP0344	4	-	340560	Primary	31	123	1.9044	134	1.69072	UAUUUAAACUAUUUUUUACUUUUUUAUUUUAAAAG
		-	340550	Secondary	41	9	2.49975	13	1.2826	UAUUUUUUACUUUUUUAUUUUAAAAGAUUUUAAGUG
		-	340553	Secondary	38	20	1.8333	9	1.10227	AACUAUUUUUUACUUUUUUAUUUUAAAAGAUUUUAA
		-	340565	Secondary	26	33	1.1162	23	1.06133	AAUAAUUAUUUAAACUAUUUUUUACUUUUUUAUUUU
MMP0345	1	-	341574	Primary	23	6	1.85702	6	1.24999	AAAUUAAAAUUUACCUUUUUUUAUUUUUUUAAUAA
MMP0346	2	-	342435	Primary	32	44	4.38436	28	2.47361	AUUUAAAAAUUAUUUUUUUCUUAAUUUUUCAGGUG
		-	342431	Secondary	36	6	2.19976	-1	0.944448	UAAAAAUUAUUUUUUUCUUAAUUUUUCAGGUGGUAU
MMP0347	2	-	343771	Primary	43	11	1.78566	17	1.45945	UUGAAUUAUUUUUUGGAUUUUUUCGUUUUUUAAGU
		-	343787	Secondary	27	7	1.20588	11	1.16176	UUAAAAUUUUAAUUUUUUUGAAUUAUUUUUUGGAUU
MMP0348	1	-	344200	Primary	19	53	2.32497	14	1.77774	AAAAACCUUAACUUUCAUUGUUCUUUUUUUGAUUA
MMP0349	2	-	344899	Primary	40	13	1.9285	5	1.17241	UUUUUAAUUUUUUAGUAUAUUUUUAUUUUUCAAAU
		-	344916	Secondary	23	7	1.19444	6	1.16216	AACCUUAACUUUCACUGUUUUUUAAUUUUUUAGUAU
MMP0350	1	+	346608	Primary	198	10	1.47617	8	1.57139	GGCUUUAGACGUCGCAUUAAAAUCGUUAAAAGUUA
MMP0351	1	+	347584	Primary	69	11	3.19956	12	2.49981	AUAAUCACGCUAGAAUUUACAAUGAAUUACAAAAA
MMP0353	1	+	349789	Primary	14	10	1.29411	1	1.025	UGGAAAUUUGAAAUAAAUUUUUUAUUUCAUUGUGA
MMP0354	1	+	351228	Primary	194	6	1.22221	1	1.01961	UUCAAAAUAUCCUCAAUUCCCAAAUAUUUUGGUUC
MMP0355	2	-	350850	Primary	165	12	1.39999	16	1.17778	CUAAAACUUUAGCAUACUUCUUUUCAUUUCCAGUG
		-	350856	Secondary	159	12	1.21428	12	1.09375	CUAAAUCCUAAAACUUUAGCAUACUUCUUUUCAUUU
MMP0359	1	-	355866	Primary	55	7	1.17073	10	1.14706	UUAUAAAUACCCCUGCACAAUUUCAUUUCUACAGA
MMP0360	1	+	357881	Primary	181	6	1.13636	2	1.04651	GAUUAGUAUUAUCCCUAUUUUUUUAUUUAAGAAAU
MMP0363	1	-	359508	Primary	50	7	1.27999	2	1.11111	UUUAGCAUACGUUUCAAUUUUACUUUUUUUAGAAG
MMP0366	1	+	364283	Primary	197	6	1.66659	3	1.15789	AGAUUCUUUAAAAAUUAUAAUAUACAUUUUGGCAG
MMP0369	3	+	366972	Primary	34	807	5.05526	478	2.74452	UUAAAUACUUUUUCUUUUUUAUACUAUUUUGGUGA
		+	366978	Secondary	40	35	1.40229	27	1.14594	UACUUUUUCUUUUUUAUACUAUUUUGGUGAUUUAAA
		+	366986	Secondary	48	10	1.21276	1	1.01471	CUUUUUUAUACUAUUUUGGUGAUUUAAAUGUUCAAA
MMP0370	2	+	368425	Primary	36	94	1.78991	63	1.52066	UAGUAGUAACCCUAUUUCUUAUCUUUUUUUCAAUC
		+	368431	Secondary	42	18	1.37499	16	1.18823	GUAACCCUAUUUCUUAUCUUUUUUUCAAUCUCAUCA
MMP0372	3	-	369180	Primary	52	1841	3.49796	726	2.20199	UACCAAACCAUUUCUCUUUUUUUGAUUUUUAAAAA
		-	369145	Secondary	87	8	1.25806	1	1.00741	AAAAUUUAGAUGUUUUAUAGAUUCUAUUUUUGUUCG
		-	369171	Secondary	61	169	2.02424	14	1.09722	CAUUUCUCUUUUUUUGAUUUUUAAAAAAAAUUUAGA
MMP0373	4	+	370632	Primary	115	102	2.29112	140	1.58333	CCUUUUUUAAGUCUAUUUUUUACCAUUUUUCGAUA
		+	370610	Secondary	93	59	1.1891	30	1.05587	UCUUUUUAUCAUAAAACUUUUUACCUUUUUUAAGUC
		+	370623	Secondary	106	26	1.11159	22	1.04867	AAACUUUUUACCUUUUUUAAGUCUAUUUUUUACCAU
		+	370696	Secondary	179	7	1.18421	6	1.0375	UCAUCAAGGUAAUUUAUCGGAUACAUUUUUUUACAG
MMP0375	2	+	372673	Primary	128	13	1.14444	4476	1.66697	CAGCAGGGAUGACAAUCAUCAUCGAGUGGUUUAUA
		+	372675	Secondary	130	10	1.13333	2384	2.09058	AGCAGGGAUGACAAUCAUCAUCGAGUGGUUUAUAUA
MMP0382	2	+	381394	Primary	31	25	1.69443	6	1.26086	UGACUUACUUUUAUUUAAUAAAAUUUUUUUACAGA
		+	381530	Secondary	167	8	1.22222	2	1.08	ACAGUUAACUAAUUUUAUUUUGUUAUAUUUUAAAUU
MMP0383	7	+	383571	Primary	63	13992	3.95814	17473	2.02964	UAAGUGGGUCUUUUGACCCACUUUUUCUUUUUUAG
		+	383574	Secondary	66	595	1.1965	1451	1.11352	AGUGGGUCUUUUGACCCACUUUUUCUUUUUUAGAAA
		+	383577	Secondary	69	235	1.10472	746	1.08883	GGGUCUUUUGACCCACUUUUUCUUUUUUAGAAAAUA
		+	383581	Secondary	73	748	1.53428	1723	1.51067	CUUUUGACCCACUUUUUCUUUUUUAGAAAAUAGUAU
		+	383584	Secondary	76	540	5.12211	659	3.16776	UUGACCCACUUUUUCUUUUUUAGAAAAUAGUAUUGU
		+	383589	Secondary	81	19	1.32758	1	1.00541	CCACUUUUUCUUUUUUAGAAAAUAGUAUUGUUAUAU
		+	383616	Secondary	108	6	1.19354	14	1.09859	UUGUUAUAUUUGAAUUUAUAGUUUUAUUUUUAGAAC
MMP0384	2	-	384043	Primary	37	26	2.36835	89	1.31228	CCAUUUUAAAAAAAAUUUUUUUAAAUAUUUAACCC
		-	384051	Secondary	29	10	1.15384	33	1.07143	AAUAAACGGCCAUUUUAAAAAAAAUUUUUUUAAAUA
MMP0385	1	-	384354	Primary	14	22	1.70965	23	1.16084	UACCAUUACUCCCUAAACCCUUUUCUUUCUAAAGA
MMP0386	5	-	385150	Primary	132	7849	2.18726	8944	1.62406	UCUUAUUGUUACUUUUUUAUUUUCUUUUUUCAGAA
		-	385120	Secondary	162	8	1.1194	35	1.05162	UCAGAAUUUUUCAGCUAAAAUUUUAUAUAAUAAAGG
		-	385127	Secondary	155	33	1.34736	120	1.14851	UCUUUUUUCAGAAUUUUUCAGCUAAAAUUUUAUAUA
		-	385135	Secondary	147	785	4.61749	22	1.01191	UUUUAUUUUCUUUUUUCAGAAUUUUUCAGCUAAAAU
		-	385140	Secondary	142	1214	1.7787	1662	1.57055	UACUUUUUUAUUUUCUUUUUUCAGAAUUUUUCAGCU
MMP0387	2	+	386329	Primary	33	69	1.40351	13	1.05936	CUAAAUAAAACCAAAAAAUAUUAAUUUUUUAAAGU
		+	386467	Secondary	171	27	1.18367	5	1.02016	AUUGCAUUUAAUUCAUCGUCACUUAAUUUUUGAAGU
MMP0388	3	-	386312	Primary	16	50	1.22421	66	1.2716	AAGAAUUACUUUAAAAAAUUAAUAUUUUUUGGUUU
		-	386269	Secondary	59	15	1.11278	8	1.05882	UUUUUAAUUAUUUUUUGCAACUUUUUCUUUUCUGUA
		-	386295	Secondary	33	24	1.14035	21	1.13548	AAUUAAUAUUUUUUGGUUUUAUUUAGUUUUUAAUUA
MMP0391	3	-	388443	Primary	36	74	1.63793	127	1.34986	AUCUUUUUUAACCAUUAUUUUCAUUUUUUUAAUUA
		-	388423	Secondary	56	48	5.36324	101	1.76515	UUCAUUUUUUUAAUUAAUGUAAUUAUUUUUUGGUGA
		-	388434	Secondary	45	11	1.14285	16	1.05674	UAACCAUUAUUUUCAUUUUUUUAAUUAAUGUAAUUA
MMP0392	1	-	389674	Primary	52	7	4.49825	1	1.0303	UAAAUAAUAGAAAUAUAUAUCAAAUUCCAUCAAUA
MMP0393	4	-	391227	Primary	34	24	1.44444	14	1.17073	GUUUAAAUCCUAUUUUUUAAAAACUUUUUUAAAGU
		-	391219	Secondary	42	8	1.21052	-1	0.989362	UCCUAUUUUUUAAAAACUUUUUUAAAGUUAUUUAUU
		-	391222	Secondary	39	6	1.12245	-1	0.988095	AAAUCCUAUUUUUUAAAAACUUUUUUAAAGUUAUUU
		-	391239	Secondary	22	17	1.13934	3	1.02727	GAAAUUUAAAUCAGUUUAAAUCCUAUUUUUUAAAAA
MMP0394	3	-	391813	Primary	22	18	1.39999	29	1.3625	AUAUCUGAUUUUCUAUUUUAUAAUUAUUUUAUUGU
		-	391750	Secondary	85	6	1.29998	2	1.05263	UUCUAUGAAAAUCGGUAUAAUGUCAGACACUCAUGA
		-	391796	Secondary	39	8	1.33332	2	1.03846	UUUAUAAUUAUUUUAUUGUUUAACUACCCUUGCUAA
MMP0396	8	+	394439	Primary	42	89	1.35178	119	1.16643	CUAUUUUUCAAAUUUUUUUUAUUCAAUUUUAUUUA
		+	394432	Secondary	35	60	1.12931	65	1.06694	AUUUAAUUCUAUUUUUCAAAUUUUUUUUAUUCAAUU
		+	394442	Secondary	45	50	1.2994	103	1.19508	AUUUUUCAAAUUUUUUUUAUUCAAUUUUAUUUAAAA
		+	394450	Secondary	53	19	1.24359	59	1.17825	AAUUUUUUUUAUUCAAUUUUAUUUAAAAUAUGUAUU
		+	394452	Secondary	55	8	1.11764	3	1.00926	UUUUUUUUAUUCAAUUUUAUUUAAAAUAUGUAUUUU
		+	394457	Secondary	60	7	1.12727	10	1.03378	UUUAUUCAAUUUUAUUUAAAAUAUGUAUUUUCCCAA
		+	394469	Secondary	72	6	1.15384	16	1.06275	UAUUUAAAAUAUGUAUUUUCCCAAGAUUUUUCAAAU
		+	394478	Secondary	81	10	1.62496	36	1.23841	UAUGUAUUUUCCCAAGAUUUUUCAAAUUUUUAAUUU
MMP0397	1	+	397298	Primary	21	71	2.20337	47	1.48958	AAUAAAUAAUUUUAUUUCUUUUCUGUUUUUGAUAA
MMP0399	1	+	399169	Primary	110	25	5.16597	40	1.85105	GGAAUUAAAUGCAAACAUAGUGUACACUCAGCAGU
MMP0400	2	+	399748	Primary	26	65	2.14033	24	1.36922	UUAAUUUUAUAUUAUUUUUUUUAUUUUUUUGGUGA
		+	399754	Secondary	32	7	1.38887	3	1.06383	UUUAUAUUAUUUUUUUUAUUUUUUUGGUGAUUUUAU
MMP0401	2	+	400702	Primary	6	8	1.33332	3	1.0566	GAGAUUGAAAAGGAUUUAAUUUAAACUUUUAGGUA
		+	400850	Secondary	154	6	1.23999	2	1.04545	AUAUAUUCAAUAGAUCAAAACGAUAAUUUUUAUGAA
MMP0402	2	+	402118	Primary	42	19	1.42221	7	1.07292	UCUAAACCUUAUUUUUUUACAAUAUUUUUUUACAA
		+	402114	Secondary	38	15	1.17442	2	1.01786	CUUCAUCUAAACCUUAUUUUUUUACAAUAUUUUUUU
MMP0405	5	+	405334	Primary	18	175	1.80275	34	1.17172	UGCCCAAUUUAAACUAAUUCUUUUUUUAUUCGGGA
		+	405331	Secondary	15	79	1.17713	21	1.084	CAUGUGCCCAAUUUAAACUAAUUCUUUUUUUAUUCG
		+	405340	Secondary	24	13	1.10236	0	1	AAUUUAAACUAAUUCUUUUUUUAUUCGGGAUUUUAU
		+	405396	Secondary	80	51	2.0408	53	1.49532	ACACGAUUCCAAAAAAAAUAGUCCUUGCUCCAAUGG
		+	405403	Secondary	87	7	1.19999	3	1.03261	UCCAAAAAAAAUAGUCCUUGCUCCAAUGGCUGGGAU
MMP0406	1	+	406248	Primary	134	13	1.10156	2	1.01143	UAUGAUUUCCCUUCCAUCUCCGUAAAGAUCCAUCU
MMP0407	4	-	405959	Primary	170	97	1.37308	90	1.25281	UUUUUCAGGGAAAUUUUCCCUAAUUUUUUUCAAGU
		-	405951	Secondary	178	53	1.92981	41	1.26623	GGGAAAUUUUCCCUAAUUUUUUUCAAGUAUUCUAAA
		-	405954	Secondary	175	21	1.18261	9	1.04286	UCAGGGAAAUUUUCCCUAAUUUUUUUCAAGUAUUCU
		-	406106	Secondary	23	16	1.31372	8	1.10959	UAUGCUAAAAUCCCUACAUUAGUUACAUUUUAUUAA
MMP0408	1	+	407657	Primary	36	10	1.3846	2	1.11764	AUAAAAAAUUAAACUAUUUUUUCAAAUUUUCAACA
MMP0409	1	-	407612	Primary	29	8	1.26666	7	1.29165	GUUUAAUUUUUUAUUUUUAUUUAAUUUUUUAACUU
MMP0411	3	-	409784	Primary	83	9	1.56246	14	1.14141	AAAUUAUUUUAUUUUAAUUAUUCCCCAUUUAAAAU
		-	409792	Secondary	75	7	1.21874	8	1.06667	AAAUAGUUAAAAUUAUUUUAUUUUAAUUAUUCCCCA
		-	409829	Secondary	38	8	1.16	1	1.00741	UUAGUAUAUCUUUUCCUUUUUUCUAAUUUUAAUUAA
MMP0413	1	+	414056	Primary	28	21	1.80766	268	1.76571	AAAUACUCUUUUUACUAUUUUUAAUUAUUUCAAAA
MMP0414	2	-	414058	Primary	33	90	2.47539	7	1.05147	AAAUUUUUAAACUUUUUUAAAAUCUUUUUUGAAAU
		-	414049	Secondary	42	7	1.14893	0	1	AAACUUUUUUAAAAUCUUUUUUGAAAUAAUUAAAAA
MMP0415	1	+	417972	Primary	195	7	1.19444	0	1	UCUAGGAUCCCAGGCUGUUACAUACCUUCAACUGC
MMP0418	5	+	420358	Primary	35	26	1.78785	6	1.23999	UCUUUUUUUUAGUUUUUAUUACCUAUUUUUCCAAA
		+	420345	Secondary	22	13	1.1625	6	1.13636	CUUCUAUAAUUUUUUCUUUUUUUUAGUUUUUAUUAC
		+	420348	Secondary	25	8	1.11594	7	1.19999	CUAUAAUUUUUUCUUUUUUUUAGUUUUUAUUACCUA
		+	420374	Secondary	51	12	2.49981	3	1.2727	UUAUUACCUAUUUUUCCAAAAGCUAUUUUUUAAUGG
		+	420522	Secondary	199	8	1.17021	11	1.09565	AAUGGGUUUCAUUUUAGCGGCAGUUGGUUCUGCAGU
MMP0419	3	+	422135	Primary	158	233	1.83512	77	1.34222	UUUUUACUUUUUUUUUACUUUUUUAUUUUUAAAAU
		+	422145	Secondary	168	16	1.24615	5	1.04065	UUUUUUUACUUUUUUAUUUUUAAAAUAAAUUAAAAA
		+	422169	Secondary	192	7	1.19444	4	1.03704	AUAAAUUAAAAAAUUAGGGUUUAUAAUCCUUAAAAA
MMP0420	1	+	423280	Primary	28	28	2.037	71	1.94665	AACCUUUAAGGUGGAAAAGAUGUACCAGAUUAUUA
MMP0421	4	+	424216	Primary	32	10	1.26315	31	1.31958	UAAAAUCAUCAAGAAAAUAGGGAAAAAUAUGGAAA
		+	424214	Secondary	30	8	1.16326	-2	0.984616	AUUUAAAAUCAUCAAGAAAAUAGGGAAAAAUAUGGA
		+	424279	Secondary	95	6	1.18749	3	1.03	AAAUCGAAAACGAAGAGUCAGAACAGAUAAUCGAAG
		+	424319	Secondary	135	6	1.18181	1	1.00952	ACUACCUCCGGGACUUCCGCAAUCAGUUAUUGGAAG
MMP0422	2	+	424715	Primary	48	25	1.64101	7	1.125	UAUUCUCAAACAGUUAAAACAAACUUUUUUAAGCG
		+	424685	Secondary	18	23	1.15436	11	1.09649	CGUAUAUCUCUAAACUGUUUUAAAAUUUUUUUAUUC
MMP0423	2	+	426256	Primary	68	9	1.29031	34	1.44736	UCUUGUCUUAAAUUUUAAAUUACUCUUUUUAAAUA
		+	426217	Secondary	29	8	1.13559	1	1.00667	AAAUUUAAUUAAACUUCCUUUUUUAAAUUUUAAUAA
MMP0424	2	-	426267	Primary	48	12	1.46152	3	1.06383	UCAAAAGACCAAAUAUUCUUUUUUCACUUUAAUCA
		-	426273	Secondary	42	6	1.14285	2	1.03774	UAAUUAAUCAAAAGACCAAAUAUUCUUUUUUCACUU
MMP0426	1	+	428179	Primary	18	6	1.14634	1	1.01124	UACAUAAAAUAAUUUCUCUUUUGAUUUUUUGAAAA
MMP0427	4	-	428180	Primary	44	45	2.40621	48	1.44036	UUUUAAAAUAUUUUUCUAAAUUAAAUUUUCAAAAA
		-	428171	Secondary	53	6	1.39997	-2	0.976471	UAUUUUUCUAAAUUAAAUUUUCAAAAAAUCAAAAGA
		-	428173	Secondary	51	6	1.27272	3	1.03659	AAUAUUUUUCUAAAUUAAAUUUUCAAAAAAUCAAAA
		-	428193	Secondary	31	15	1.12397	17	1.07083	ACUUUUUUUAAAUUUUUUAAAAUAUUUUUCUAAAUU
MMP0428	1	-	429247	Primary	14	34	1.87177	24	1.32432	UUUUAUGAAAUUCUAAAAAUUUUCUUUUUUAAAUA
MMP0429	5	+	430941	Primary	27	159	1.82383	85	1.22727	UAAGUUCUUUUUUAAUUUUUUUAUUUUAUUACAUC
		+	430938	Secondary	24	90	1.20408	38	1.0754	AUACUAAGUUCUUUUUUAAUUUUUUUAUUUUAUUAC
		+	430947	Secondary	33	31	1.2562	30	1.09804	UCUUUUUUAAUUUUUUUAUUUUAUUACAUCCAAUUU
		+	430952	Secondary	38	12	1.14815	8	1.02632	UUUAAUUUUUUUAUUUUAUUACAUCCAAUUUAAUUU
		+	430957	Secondary	43	21	1.38181	10	1.03623	UUUUUUUAUUUUAUUACAUCCAAUUUAAUUUCAGGG
MMP0430	1	+	431685	Primary	18	18	1.43901	43	1.25444	GUCGAAGAAUAAUCUUUUUUUCUGAUUUUUAAAUU
MMP0431	1	-	431708	Primary	22	33	1.65999	30	1.18987	UAAAAUAACAAUACUAUUUUUUAAAUUUUUAAAAG
MMP0433	2	+	434523	Primary	47	13	1.13	11	1.05914	UAAAUUAUUUUAAUAUUUUUUUUAGGUUUUUGAAG
		+	434634	Secondary	158	8	1.12121	7	1.05036	AUACUGCCUGAAUAAGGUCUAUAUUAAAAGCUCCGA
MMP0434	2	-	434482	Primary	33	62	2.01638	107	1.73793	AAAUAUUAAAAUAAUUUAUUUUUAAUUUUUAAGAU
		-	434478	Secondary	37	6	1.13333	0	1	UAUUAAAAUAAUUUAUUUUUAAUUUUUAAGAUUUAA
MMP0439	6	+	439500	Primary	22	11	1.15493	1	1.01111	AGAAAUAAUUCUUAAUUUUUAUCCGAUUUUAAGAA
		+	439522	Secondary	44	6	1.14634	4	1.05333	UCCGAUUUUAAGAAUUAUAAAAACCGUGCGUAGAAU
		+	439566	Secondary	88	7	1.16666	9	1.11392	CAAAAACGAGAAUAUAUAUAGUGAAACUGUUUUAUU
		+	439634	Secondary	156	8	1.2857	7	1.10145	AAAAGUUUAAUCUGCUACUGAGGUGGUUAUUUGUAC
		+	439647	Secondary	169	6	1.35292	1	1.01695	GCUACUGAGGUGGUUAUUUGUACAAAAUUUUAAAAA
		+	439655	Secondary	177	6	1.59994	-1	0.986111	GGUGGUUAUUUGUACAAAAUUUUAAAAAUUUCUGAU
MMP0440	3	+	440226	Primary	29	37	1.50684	30	1.09146	AUUUUUUCACCAUUAUUUCUAUUUAAUUUUAAUUU
		+	440231	Secondary	34	8	1.15686	14	1.04667	UUUCACCAUUAUUUCUAUUUAAUUUUAAUUUGAGGU
		+	440236	Secondary	39	15	1.39473	6	1.02231	CCAUUAUUUCUAUUUAAUUUUAAUUUGAGGUGAAUU
MMP0441	3	+	440436	Primary	15	75	2.0135	120	1.28037	CUGAGCGUUAAAUAACUUAAUUUUAUUUUUGUUAU
		+	440441	Secondary	20	7	1.11864	19	1.04847	GCGUUAAAUAACUUAAUUUUAUUUUUGUUAUAGUGA
		+	440579	Secondary	158	28	1.49999	16	1.06299	AUAGGUGAUGUUACUACAAAACACCUUUUAUCGAAU
MMP0442	2	+	441099	Primary	170	36	1.25532	112	1.29946	AAACAAACAAGUUCUCGUAGUUGACACUUUAGAUC
		+	441027	Secondary	98	21	1.1066	16	1.02564	UCACAGUAUCAUUUGAUGCAGCUACCCCUUCAAUCA
MMP0444	8	+	441512	Primary	63	273	1.65625	127	1.16956	AAUAUUUACUUCUUUUUUAAUAUUACUUUUAAUUU
		+	441500	Secondary	51	267	1.22918	364	1.23199	UCUUUUAACGUUUAAUAUUUACUUCUUUUUUAAUAU
		+	441506	Secondary	57	132	1.14379	140	1.12059	AACGUUUAAUAUUUACUUCUUUUUUAAUAUUACUUU
		+	441517	Secondary	68	55	1.17742	26	1.03835	UUUACUUCUUUUUUAAUAUUACUUUUAAUUUAAAUC
		+	441524	Secondary	75	25	1.10593	8	1.01391	CUUUUUUAAUAUUACUUUUAAUUUAAAUCAUUUUAG
		+	441527	Secondary	78	90	1.89108	137	1.35309	UUUUAAUAUUACUUUUAAUUUAAAUCAUUUUAGUGA
		+	441537	Secondary	88	8	1.125	3	1.00898	ACUUUUAAUUUAAAUCAUUUUAGUGAAAUUAUACUU
		+	441544	Secondary	95	9	1.16363	7	1.02397	AUUUAAAUCAUUUUAGUGAAAUUAUACUUUUAAUUA
MMP0447	4	-	442499	Primary	31	216	1.85714	239	1.46589	UUUAAAUUAUUCUUUUUUUUUAAAUUUUUUAAAUA
		-	442470	Secondary	60	17	1.94439	54	1.6279	UUAAAUAAAUACUAAGUAUAAAUUAAAUUUUAAAAG
		-	442477	Secondary	53	6	1.14285	1	1.00641	AAAUUUUUUAAAUAAAUACUAAGUAUAAAUUAAAUU
		-	442488	Secondary	42	38	1.57575	33	1.19527	UCUUUUUUUUUAAAUUUUUUAAAUAAAUACUAAGUA
MMP0452	1	-	445582	Primary	29	32	1.68084	8	1.14814	AAUAUCGCUAAUUCCUUUUUUAAAAUUUUUAAAAC
MMP0455	2	-	447659	Primary	44	8	1.24999	1	1.04348	AUACUUUUUUAAAUAAUACUAUUUACUGGUUAAUA
		-	447679	Secondary	24	7	1.12069	14	1.29787	AAAUUAAUACUGCAUUUUUAAAUACUUUUUUAAAUA
MMP0457	2	+	451881	Primary	51	107	1.428	219	1.1551	AAUUAUUUUAAAUUCUUUUUUUAAAUUUUUAACAG
		+	451911	Secondary	81	35	1.60344	151	1.25637	UAACAGAAUCUUUUAGAAAUUUUAUAUUUUUCGACU
MMP0458	3	+	454118	Primary	3	781	1.91559	2100	3.16272	ACCCGAGUUCAAAUCUCGGUCUCCGCGUUUUUGAU
		+	453982	Secondary	23	10	1.71423	26	1.21849	AAAUUUAAAAAUUAUCCUUAUUUAAAUUUUAAAUAU
		+	454098	Secondary	139	231	1.14286	92	1.02623	AAUCCCGUUACGCUCUGCGUAACCCGAGUUCAAAUC
MMP0459	1	+	454987	Primary	149	367	3.44665	36	1.34951	UUUCCCAAGAUAUUUCCCACCUCGGGCAAUAUAAA
MMP0464	1	-	462501	Primary	20	6	1.5454	6	1.35292	CAAACAUUAAUCUCUUUUGCUACUUUUUUUAGUUU
MMP0476	1	-	473692	Primary	25	20	1.57141	35	1.2	AAUAACUUGUUUACUCUUUUCACAAUUUUUCAACA
MMP0480	3	+	476399	Primary	150	30	1.19108	30	1.05608	UUAACCCUAUUUUUUCAAUAUUCUCUUUUUCAGUG
		+	476436	Secondary	187	9	1.10465	12	1.02857	AGUAAUAAAGACAUUCUUUAUUCAUUAUCUUAUCCA
		+	476445	Secondary	196	21	1.34999	56	1.17021	GACAUUCUUUAUUCAUUAUCUUAUCCAUAUUAACAU
MMP0482	2	-	478546	Primary	25	13	1.29545	18	1.27272	CUUAAGCUUUUUUACUUUUUUAAAUUUUUUAAAAC
		-	478538	Secondary	33	9	1.37498	1	1.01923	UUUUUUACUUUUUUAAAUUUUUUAAAACCCUGAUUC
MMP0487	1	+	485746	Primary	31	8	2.33311	4	1.49994	UUCUUUUUUUAUUUUUUAUAACAAUUUUUUGUAAA
MMP0489	2	-	486352	Primary	73	32	1.91426	17	1.40475	AAUAACCUCCACAUAUUUUUUUAAUUUUUUAAACU
		-	486341	Secondary	84	9	2.12486	2	1.09091	ACAUAUUUUUUUAAUUUUUUAAACUAAUUUUCAAAA
MMP0490	2	-	487165	Primary	24	13	1.64997	9	1.15254	GAUUAAUUUAUUACUUUUUUAAACUAUUUUCCACA
		-	487139	Secondary	50	6	2.19976	11	1.40739	AUUUUCCACAAAAAUUUGCCAAUAACCUUUUGAAAC
MMP0493	1	-	489215	Primary	22	8	1.38093	18	1.74997	GAAAAUAAUCCUUUUCUUUUUUUAUUUUUUAAAUA
MMP0496	1	+	501265	Primary	139	9	1.49997	3	1.21427	UACUUUCAAAAAUAUCUUUUAAUUCAUUUUCAGAG
MMP0498	1	+	502734	Primary	76	31	1.63264	14	1.17948	CAGCAAAAUAAUUAUUUUUUUUAGUUUUUUUAGAA
MMP0500	4	+	504477	Primary	101	41	2.28121	42	1.67741	AGAGUGUUUAUUCACUUUUUAAGUCUUUUUGAAUC
		+	504445	Secondary	69	16	1.12214	22	1.13018	UAAUAAUGAUAUAUCUCAUAUUUCUUUUUUUAAAGA
		+	504474	Secondary	98	12	1.1165	2	1.01429	UUAAAGAGUGUUUAUUCACUUUUUAAGUCUUUUUGA
		+	504522	Secondary	146	7	1.69993	2	1.05128	UUCAAUUCUAAAAAUAUAUAAAAAAAGAUUUUAUUU
MMP0502	1	+	507594	Primary	21	7	1.23333	4	1.02878	UGUGAUUAAAUAAACUUUUUUAAAUUUUUUUAAGA
MMP0511	2	+	517291	Primary	50	31	6.16581	2	1.28567	GAUUUUUUCUUCCUUACACUAGUUUCUUUUGGAAA
		+	517289	Secondary	48	12	1.28571	4	1.4444	GAAGAUUUUUUCUUCCUUACACUAGUUUCUUUUGGA
MMP0514	2	+	520991	Primary	81	11	1.91659	0	1	UUCUUUUUUAUCUACUUUUUUUGUAUUUUUUAUAG
		+	520983	Secondary	73	7	1.24999	1	1.0625	AUUAAAAAUUUCUUUUUUAUCUACUUUUUUUGUAUU
MMP0516	4	+	522603	Primary	42	23	1.33823	12	1.20339	AAACUAAAUUAUAAUUUAAUAUUCAUUUUUGUACA
		+	522658	Secondary	97	14	1.2745	1	1.02174	AACAAUAUUUUUAUUAAGGCUUUUUAUUUUUCUUAU
		+	522661	Secondary	100	7	1.175	2	1.04545	AAUAUUUUUAUUAAGGCUUUUUAUUUUUCUUAUUGA
		+	522664	Secondary	103	6	1.17142	3	1.07317	AUUUUUAUUAAGGCUUUUUAUUUUUCUUAUUGAAUU
MMP0519	1	-	523552	Primary	14	8	2.9995	1	1.1111	AAAACUAAAAUUAUAGCUUUUUUUCAUUUUAAGGC
MMP0524	2	-	529994	Primary	51	75	4.26073	19	7.33122	UAAAAUAAUAUCCAUAUCUUUUAAUUUUUUAAAAA
		-	529986	Secondary	59	8	2.33311	0	1	AUAUCCAUAUCUUUUAAUUUUUUAAAAAGCGUGAUA
MMP0526	1	+	532483	Primary	132	6	1.13953	15	1.10949	AGUUCAGGUAAUAGUUCAAGGGGACACCACGUAUG
MMP0528	3	-	532907	Primary	80	65	1.73863	8	1.03865	AAAACUAUCCCCCUAACUUCUAAAUCACUUAACGU
		-	532821	Secondary	166	11	1.18965	8	1.02649	GGGUCAUCUCCCCAUGAUCCAUUAAUAUUUUUACAA
		-	532916	Secondary	71	29	1.10584	22	1.08	CUCAUAUCUUAAAACUAUCCCCCUAACUUCUAAAUC
MMP0529	1	-	533436	Primary	197	159	2.22307	280	2.56424	AUACCCCAGAAAAAUUAAUUCUGGGAUAAUAUAAA
MMP0531	1	+	536708	Primary	73	8	1.24242	9	1.22499	AAAUCAGUAUAACUUUUUAUAUUCUUUUUUACAAA
MMP0532	2	+	538311	Primary	49	15	1.68179	1	1.02703	AAUCUUCCUAAAAUUCUCUUUUUUCCUUUAAAUCG
		+	538305	Secondary	43	12	1.19672	3	1.05263	UUAAGUUAAUCUUCCUAAAAUUCUCUUUUUUCCUUU
MMP0533	1	+	538998	Primary	46	18	1.89996	13	1.19117	AAAUAAAUAUUAUUCUUUUACUAAUUCUUUGGAUA
MMP0534	1	-	539165	Primary	29	16	1.37208	8	1.10256	AAUUAUUAAAAAUCUUUUGAAUAUUCUUUUAAUGA
MMP0536	2	-	541038	Primary	26	7	1.46664	2	1.14285	AUAAUUAAAUUUUUUAUUUUACAAAAUUUUAAAUU
		-	541030	Secondary	34	6	1.66659	0	1	AAUUUUUUAUUUUACAAAAUUUUAAAUUAUUAUGAA
MMP0538	1	+	543327	Primary	50	22	1.64704	19	1.23456	CUUAUUUAUUUUUCCGAUUUUUUAAUUUUUAUUAA
MMP0539	4	+	544944	Primary	39	41	1.41836	27	1.24107	AACACAUUAAUUUUCGAUUUUUUUAUUUUUACUAU
		+	544947	Secondary	42	8	1.11594	3	1.03614	CACAUUAAUUUUCGAUUUUUUUAUUUUUACUAUCUA
		+	544951	Secondary	46	12	1.23529	1	1.01282	UUAAUUUUCGAUUUUUUUAUUUUUACUAUCUAAUUU
		+	544958	Secondary	53	7	1.17948	4	1.0597	UCGAUUUUUUUAUUUUUACUAUCUAAUUUAUAACAA
MMP0540	3	+	545764	Primary	20	20	1.48779	9	1.12162	CUUAAAAUAAUUAUUUUUACUUUUCUUUUUACCGA
		+	545767	Secondary	23	7	1.27999	1	1.0137	UAAAAUAAUUAUUUUUACUUUUCUUUUUACCGAUUG
		+	545771	Secondary	27	6	1.37498	3	1.04225	AUAAUUAUUUUUACUUUUCUUUUUACCGAUUGGUGG
MMP0541	3	+	546469	Primary	47	14	1.41175	20	1.19802	GACUUAAAACAGCUUUUUUCGAACUUUUUUGCUUU
		+	546437	Secondary	15	9	1.14754	9	1.04918	GAACCACAUUAACUAACUUUUUUCAGCUUUUUUGAC
		+	546502	Secondary	80	6	1.5454	6	1.11764	UUUGUUUUAAAUAAAAAUAUUUAUAUAUCUUACAAC
MMP0542	1	+	547230	Primary	80	45	2.28568	109	1.72185	AAAGCCUCAUAUUGUCAUAGGUGACCUUUCAAAAA
MMP0543	1	+	547856	Primary	157	16	2.23068	5	1.13888	CGAAAACAUAGAUUGCAAACUUUAUGCUGUAAACU
MMP0544	1	+	548899	Primary	175	8	2.33311	12	1.28571	AGAUAUAGUUUCAAGUGUAGAUGUACCUCCAUUUG
MMP0545	1	+	550621	Primary	20	30	1.52631	25	1.21367	UGAAUGUUAAAUAUUCUUUUUUUAAUUUUUAACAG
MMP0546	2	+	551449	Primary	20	13	1.3421	10	1.06667	UGGAUGUUAACCAAUACUUUUUUUAAUUUUGUCAA
		+	551478	Secondary	49	8	1.57139	30	1.34091	UUGUCAAAUAUAUUAAAUAUAAAACUUUUUUCAAGU
MMP0549	3	+	554010	Primary	18	19	1.32203	16	1.09467	AGAUUUAUUUAAUUCUUUUUUAAUUUUUUUAUAAA
		+	554012	Secondary	20	19	1.48717	18	1.12949	GAUUUAUUUAAUUCUUUUUUAAUUUUUUUAUAAAUU
		+	554018	Secondary	26	15	1.78943	28	1.37837	UUUAAUUCUUUUUUAAUUUUUUUAUAAAUUUAAUUC
MMP0550	2	+	554982	Primary	25	89	2.77996	38	1.74508	AAUAAUUUUCUAAACUUUUAAACUAAUUUUGGUGU
		+	554987	Secondary	30	14	1.93327	3	1.1	AUUUUCUAAACUUUUAAACUAAUUUUGGUGUUUUUA
MMP0553	2	-	556585	Primary	56	49	2.25638	27	1.2967	UUUUAACUGUAUCAGAAACUUUACUUUUUUCGAUU
		-	556611	Secondary	30	21	1.16667	15	1.0974	AUUUAAGUUUACUUUUUAUUUUUUAAUUUUUAACUG
MMP0555	2	+	559054	Primary	37	8	1.24242	1	1.02778	UUUCAAUCCCAUAAACGUUUUCUACAUUUUCUUUA
		+	559067	Secondary	50	6	1.31577	-1	0.970589	AAACGUUUUCUACAUUUUCUUUAUGGAUUUUAAAAC
MMP0559	3	+	561232	Primary	21	124	2.22771	78	1.61904	GGAAAAUAAGUAUUUCUCUUUUUAAUUUUUAAAUU
		+	561238	Secondary	27	19	1.43181	30	1.42253	AUAAGUAUUUCUCUUUUUAAUUUUUAAAUUUAGAUU
		+	561242	Secondary	31	11	1.73328	3	1.08333	GUAUUUCUCUUUUUAAUUUUUAAAUUUAGAUUAAUA
MMP0561	2	-	562025	Primary	23	15	1.29411	14	1.26415	UAAAUAAUUUUUCACGUUUUUUAAAUUUUUGAAAA
		-	561960	Secondary	88	8	1.19512	2	1.03448	CCGGAGAAUACUUCUUUAUUUUAUUAAUUUUGUAUU
MMP0562	1	-	562807	Primary	10	7	1.41174	3	1.05454	UUUUAAUGAAAUUUAUUUAAAUUUUUUUUUAAAUU
MMP0563	1	-	563218	Primary	40	26	7.49838	4	1.28569	UCAAUAUUUAUCCCCGAUAUAACUUUUUUUAGGAA
MMP0566	3	-	565674	Primary	23	69	1.82142	62	1.56363	AUUAUAAUAUAUAUCUUUUUUAUUAAUUUUAGAUU
		-	565664	Secondary	33	7	1.3684	-1	0.980393	UAUAUCUUUUUUAUUAAUUUUAGAUUUAUGGUUAAG
		-	565668	Secondary	29	18	1.59998	21	1.36841	AAUAUAUAUCUUUUUUAUUAAUUUUAGAUUUAUGGU
MMP0572	4	-	571686	Primary	35	379	2.04121	277	1.47189	UUAAAUAAUAUCUUCUUUUUUUAAAUUAUUAUCCG
		-	571657	Secondary	64	10	1.27026	8	1.04734	UUAUCCGCGUCAUUUCAAAUAGUAACUUUUUUAAAU
		-	571679	Secondary	42	52	1.74285	3	1.0124	AAUAUCUUCUUUUUUUAAAUUAUUAUCCGCGUCAUU
		-	571684	Secondary	37	80	1.30769	82	1.17711	UAAAUAAUAUCUUCUUUUUUUAAAUUAUUAUCCGCG
MMP0573	1	+	573182	Primary	20	10	1.18518	2	1.01149	UGACAGAUAAUUUAUUUUUUAAUAAUUUUUCGUUU
MMP0574	2	-	573498	Primary	70	129	1.25097	75	1.13889	UAUGUUCUUUUAAAAUUUACAUUUAUUUUUAAUUU
		-	573523	Secondary	45	163	1.20248	31	1.0415	AUUUACCCUUUUUUUAAAUUUUGAGUUAUGUUCUUU
MMP0575	1	-	573532	Primary	36	1617	1.76562	1407	1.48888	AAUUAAUUAUUUACCCUUUUUUUAAAUUUUGAGUU
MMP0576	3	-	573806	Primary	155	55	1.26316	98	1.29429	GAAACGAAAAACGUACUCAGAGAUGACGAUGAAGC
		-	573939	Secondary	22	10	1.13158	6	1.02913	UUAAAAUAAUCACGGUUCGUGAUACUAUGAUAGAUG
		-	573947	Secondary	14	33	1.33	28	1.1407	UAGGCCUCUUAAAAUAAUCACGGUUCGUGAUACUAU
MMP0577	1	-	574641	Primary	199	116	1.61702	107	1.26225	ACGAAAAAGUCGUUGAAAAGGUUGUUGAAUUCGUA
MMP0578	2	-	575053	Primary	58	21	1.34426	7	1.04516	CAAAUGUAUUAUAAAAUGAAACAAGAUUAUCUAAG
		-	575087	Secondary	24	13	1.11207	6	1.03488	CGGGUAACUUUAGCUAAAUAUAUAAAUAAUAAUUAC
MMP0581	1	+	577831	Primary	17	10	1.9999	1	1.05882	UUUUGAAAUUUAAUAUUUUACUAUUUUUUUAUGUG
MMP0584	1	-	578988	Primary	41	39	2.21871	64	1.78048	UUUUUUCAAAAUCUUUUUUUAAUAUUUUUUAGUUG
MMP0585	5	+	582602	Primary	53	169	1.61232	88	1.15068	AGGGGACACGUUAUAUAAUUUUCUUUUUUUCGGUA
		+	582569	Secondary	20	151	1.26215	57	1.08533	CUUCUGAAUAAUAACUUAUUUUAUUAUUUUUAGAAG
		+	582669	Secondary	120	11	1.11	9	1.02338	UGGUAUUCUUGAUAUAUUUCAAGAUUUUUUUCGACA
		+	582677	Secondary	128	13	1.16456	6	1.01676	UUGAUAUAUUUCAAGAUUUUUUUCGACAUUUUCUUC
		+	582700	Secondary	151	6	1.125	42	1.17427	CGACAUUUUCUUCAAAUAACUCUUUAAUUUUAUCGU
MMP0589	1	+	587453	Primary	122	6	1.11764	1	1.00559	UAGUCAAUUGUUACAUAUUCUUCGGUUAUUUUUGC
MMP0590	1	-	587316	Primary	20	18	1.44999	16	1.08939	AAAACACUAACUCGUUAUUUUACUAUUUUUCCAGU
MMP0591	5	-	588047	Primary	21	142	2.10937	81	1.47368	AAAGAAUAAUCUACAUUCCUUUACUUUUUUAAUGU
		-	587979	Secondary	89	7	1.11111	0	1	AUAACGAAGAAAAAAAUAUUAUCUCUGUUUUAAAGG
		-	588033	Secondary	35	7	1.20588	-1	0.990909	CAUUCCUUUACUUUUUUAAUGUGAUAAUGAUGAUGG
		-	588035	Secondary	33	12	1.29268	1	1.00917	UACAUUCCUUUACUUUUUUAAUGUGAUAAUGAUGAU
		-	588039	Secondary	29	10	1.18182	0	1	AAUCUACAUUCCUUUACUUUUUUAAUGUGAUAAUGA
MMP0592	1	-	588699	Primary	39	8	1.33332	3	1.05454	UAUGAAAAAAAUACACUACUUAUUUUUUUUAAGUU
MMP0596	3	+	593358	Primary	60	20	1.33898	99	1.66	GGGUAAAAGAAAUUUUUGAUAACGUAUAUUCAGUA
		+	593362	Secondary	64	6	1.12	3	1.02069	UAAAAGAAAUUUUUGAUAACGUAUAUUCAGUAGAUU
		+	593498	Secondary	200	6	1.10909	20	1.14493	AUGGAAUCCAAACAAGAGUAAACUUGGAGCUGCAAU
MMP0597	3	+	594061	Primary	53	74	1.53623	31	1.12705	UUAAAUAACCUUAAAAUAUUUCUUUUUUAUAAAAU
		+	594068	Secondary	60	17	1.18478	5	1.02381	AACCUUAAAAUAUUUCUUUUUUAUAAAAUAUAUAUU
		+	594073	Secondary	65	30	1.73169	13	1.07262	UAAAAUAUUUCUUUUUUAUAAAAUAUAUAUUGAUCG
MMP0598	1	+	595504	Primary	53	9	1.52938	18	1.10286	UUUACCAAUUCAUCUAUUUUUUCAAAUUUUAACGG
MMP0600	3	-	596114	Primary	123	38	1.99997	41	1.40594	AAGAAAUUUUAAAGACUCUUUUUUAAUUUUAACCA
		-	596095	Secondary	142	8	1.49997	7	1.10145	UUUUUUAAUUUUAACCACCACAACAGACUUUGGUGG
		-	596218	Secondary	19	29	1.31183	20	1.1227	ACAUCACCAUAACCAUAUUAUUUAUUAUUUUGAAAA
MMP0601	6	-	596994	Primary	21	219	2.14659	276	1.78632	UUUGAAUAAUCCUUCUUUUUUAAACUUUUUAAUUA
		-	596948	Secondary	67	9	1.56246	5	1.09091	CUGAAAAAUUCUAUUUUUAUAUAUGAUAUUUUAUUU
		-	596959	Secondary	56	7	1.19999	2	1.02222	AAGUAUUUAUUCUGAAAAAUUCUAUUUUUAUAUAUG
		-	596961	Secondary	54	22	1.54999	20	1.21505	UUAAGUAUUUAUUCUGAAAAAUUCUAUUUUUAUAUA
		-	596983	Secondary	32	18	1.21428	11	1.06286	CCUUCUUUUUUAAACUUUUUAAUUAAGUAUUUAUUC
		-	596986	Secondary	29	18	1.15929	3	1.01493	AAUCCUUCUUUUUUAAACUUUUUAAUUAAGUAUUUA
MMP0603	4	+	599301	Primary	166	12	1.15789	7	1.03125	UCAACGUACUCUCUUAAAUAUUUAUAAUUUACUUG
		+	599143	Secondary	8	6	1.10909	9	1.05114	GAUACUUAGACUUCAUGCGAUAGGGAUAUUAAUGAA
		+	599226	Secondary	91	9	1.10112	10	1.04587	GGGAGUUUCAAAAAAAGAUAGUUGAACGAAAAAAGA
		+	599308	Secondary	173	8	1.125	15	1.07653	UACUCUCUUAAAUAUUUAUAAUUUACUUGUCGCAAA
MMP0604	5	+	599990	Primary	25	358	2.19333	121	1.39672	AUUAAUAAAAUUUCUACAAAAUCUUUUUUUAAGUA
		+	599994	Secondary	29	27	1.13775	2	1.00778	AAUAAAAUUUCUACAAAAUCUUUUUUUAAGUAUAAA
		+	600003	Secondary	38	15	1.10949	5	1.02618	UCUACAAAAUCUUUUUUUAAGUAUAAAUUAUAUAAU
		+	600012	Secondary	47	42	1.73683	6	1.03448	UCUUUUUUUAAGUAUAAAUUAUAUAAUAUUUAACGA
		+	600022	Secondary	57	8	1.33332	6	1.04054	AGUAUAAAUUAUAUAAUAUUUAACGAAAUUUAACUG
MMP0605	1	+	600623	Primary	23	97	1.4949	83	1.1687	GAAAUAAAUUUAUCUUUUUUUUUAAAUUUUAAAAA
MMP0606	2	-	600617	Primary	37	39	1.30952	18	1.04813	ACCAAUAUAAUUUUACUAUUUUUAAAAUUUAAAAA
		-	600624	Secondary	30	26	1.15951	-2	0.995037	AUUCUUCCACCAAUAUAAUUUUACUAUUUUUAAAAU
MMP0608	2	-	603086	Primary	16	12	1.33332	4	1.05	AUCUUAAAAAAUAACUUUUUUUAAGUUUUUAGGUU
		-	602967	Secondary	135	11	2.22209	23	1.49999	AAUAAUUGCAGAUUCACUAAAAGACAGGGGUUAUGA
MMP0610	1	+	607101	Primary	180	24	1.66665	11	1.10577	GGAAAAUAAAAUAAUCGUAGAUACUUCUUCAAAAG
MMP0611	3	+	607540	Primary	24	22	1.15385	4	1.0303	CUUUAAUUUAUUCCCAUUUUUUAACGGUUUCAUAA
		+	607605	Secondary	89	18	1.23684	5	1.03496	CAUAAGUGAAACUGAAUUUAUUUCUAUUUUUCCAAA
		+	607630	Secondary	114	10	1.33332	18	1.14286	AUUUUUCCAAAAUUAACGUGUUUAUUUUUUUCAAUC
MMP0613	3	+	609102	Primary	24	26	1.83868	3	1.12	CAAUAAAUCUUUUUUUAAACUUUUUUUAUUAAAUU
		+	609099	Secondary	21	25	1.43103	10	1.30302	AAAACAAUAAAUCUUUUUUUAAACUUUUUUUAUUAA
		+	609112	Secondary	34	7	1.49996	1	1.04348	UUUUUUUAAACUUUUUUUAUUAAAUUCAUGCAAAAA
MMP0614	2	+	609929	Primary	180	1007	1.77581	4451	2.73393	UAUUGGCAGUAUCACGAAAUCAACUGCCAAGUAAU
		+	609925	Secondary	176	293	1.13028	1288	1.19164	ACUGCUAUUGGCAGUAUCACGAAAUCAACUGCCAAG
MMP0615	2	-	609807	Primary	156	705	1.69664	1628	1.47298	CCAAAGGUAGAUACAUUAAUCCUGCUUUUUUAAAA
		-	609798	Secondary	165	112	1.81751	65	1.19939	AGAUACAUUAAUCCUGCUUUUUUAAAAAAUUUAAAA
MMP0617	1	+	613376	Primary	19	7	1.34998	4	1.15384	CCUAUCAAUAAACUUUUUUCUAAUUAUAUUAAUUU
MMP0620	3	+	615899	Primary	83	264	3.37836	138	1.62727	UUAAUUAUAAUAUCUAUUUUUUCCUGUUUUAAAAG
		+	615905	Secondary	89	11	1.18333	8	1.06611	UAUAAUAUCUAUUUUUUCCUGUUUUAAAAGAGUUUU
		+	615908	Secondary	92	15	1.35713	1	1.0102	AAUAUCUAUUUUUUCCUGUUUUAAAAGAGUUUUAUU
MMP0624	5	+	618826	Primary	28	384	1.54623	310	1.28598	AAAUUUUUUGAAAAUAAAUUCUCUUUUUUUAAAUU
		+	618832	Secondary	34	224	1.76976	201	1.33668	UUUUGAAAAUAAAUUCUCUUUUUUUAAAUUUAGUUU
		+	618836	Secondary	38	30	1.31579	6	1.01658	GAAAAUAAAUUCUCUUUUUUUAAAUUUAGUUUGAUG
		+	618840	Secondary	42	14	1.2029	5	1.01408	AUAAAUUCUCUUUUUUUAAAUUUAGUUUGAUGUAUU
		+	618842	Secondary	44	12	1.21052	27	1.08359	AAAUUCUCUUUUUUUAAAUUUAGUUUGAUGUAUUAA
MMP0625	5	-	618875	Primary	41	1885	2.63628	3101	1.95739	UGCUAAAAUCGCACUUUAAUUUCUUUUUUUAGAAU
		-	618846	Secondary	70	29	1.37662	56	1.16667	UUAGAAUAUUUACAAAAUUUAAAACUGUUUUAAUAC
		-	618859	Secondary	57	40	1.20202	8	1.01706	UUAAUUUCUUUUUUUAGAAUAUUUACAAAAUUUAAA
		-	618866	Secondary	50	159	1.49843	60	1.06147	UCGCACUUUAAUUUCUUUUUUUAGAAUAUUUACAAA
		-	618870	Secondary	46	61	1.10702	120	1.05831	AAAAUCGCACUUUAAUUUCUUUUUUUAGAAUAUUUA
MMP0626	2	-	619060	Primary	172	17	1.16346	15	1.03597	ACCUGUGUUAUCGUUGAAGUAUUAGACAAAAACUU
		-	619210	Secondary	22	11	1.17187	1	1.00292	AAAGCUUAGAUGGUAAUAAAUCUCUCUGUUUGAAGU
MMP0627	1	-	619644	Primary	134	45	1.59999	70	1.17544	AUUUAUCUUCAGAGACAUGGCAAAAGAAAUGAAUA
MMP0628	3	+	620651	Primary	74	22	1.64704	3	1.04545	UAAAAAAUCGAAUACCCCUUUAUAUAUCUUGAAAA
		+	620606	Secondary	29	18	1.2	2	1.0241	AAAUACUUUAUUAACACCAAAUAACUUUUUUGUUAG
		+	620649	Secondary	72	7	1.11475	1	1.0137	CAAUAAAAAAUCGAAUACCCCUUUAUAUAUCUUGAA
MMP0629	6	+	621166	Primary	22	404	1.52468	530	1.24146	CCAACUAAUUUUUCUUUUUUACAUUAUUUUAUGUU
		+	621174	Secondary	30	231	2.28333	595	1.71172	AUUUUUCUUUUUUACAUUAUUUUAUGUUUUUAAAAA
		+	621182	Secondary	38	39	1.39	130	1.25896	UUUUUACAUUAUUUUAUGUUUUUAAAAAUAUUAAUC
		+	621226	Secondary	82	15	1.31914	86	1.23306	UAUAUUAAAAUAUCUAAAUUAAUUACACCUUGAAUA
		+	621254	Secondary	110	6	1.19999	27	1.10189	CUUGAAUAAAAGUCUUAUUUUAACUUGUUUUUCUCA
		+	621267	Secondary	123	7	1.27999	41	1.3037	CUUAUUUUAACUUGUUUUUCUCAAAUAUUUUAUGUA
MMP0630	3	-	621298	Primary	24	33	1.73332	17	1.18681	UUUUAAUCCAGAUCUUACUUUUUUUACUUUGACCA
		-	621199	Secondary	123	6	1.17647	5	1.02326	UUCAAGGUGUAAUUAAUUUAGAUAUUUUAAUAUAUU
		-	621303	Secondary	19	11	1.13253	7	1.05785	CUUGGAUUUUAAUCCAGAUCUUACUUUUUUUACUUU
MMP0631	4	+	624311	Primary	57	20	1.35087	6	1.10909	UUAAAUAUUAUUCAUAAUUUAGACUUUUUUAAUAU
		+	624290	Secondary	36	13	1.10236	1	1.01316	CGUAAUUAAAUAUUAUAUUUUUUUAAAUAUUAUUCA
		+	624317	Secondary	63	9	1.21428	3	1.06122	UAUUAUUCAUAAUUUAGACUUUUUUAAUAUUAAAUU
		+	624324	Secondary	70	7	1.24137	2	1.04878	CAUAAUUUAGACUUUUUUAAUAUUAAAUUUCUAAAA
MMP0632	1	+	625637	Primary	36	10	1.62496	5	1.10869	UCUUGUUAUAUUUUUUUAUUUUUUUAUUUUAGUGA
MMP0633	2	+	626341	Primary	18	194	1.85087	85	1.48295	GAAGAAUAUUAAUCCUUUUUUUAAUUUUUUAAGGG
		+	626400	Secondary	77	66	2.29409	22	1.28205	GAACUAAUAUAAACUCAACAUUACCUAUUUUAUAAU
MMP0636	3	+	629868	Primary	24	52	1.4127	25	1.23364	GAAUAAUAAAUUAUUUUUUUCUUAAAUUUUAUCAA
		+	629875	Secondary	31	7	1.26922	2	1.04348	UAAAUUAUUUUUUUCUUAAAUUUUAUCAAGUGGUUG
		+	629881	Secondary	37	6	1.5454	8	1.22856	AUUUUUUUCUUAAAUUUUAUCAAGUGGUUGAGUAUG
MMP0637	1	+	630442	Primary	16	15	1.5357	35	1.25547	ACAAAUCAAACUAAUUAUUUUUUUAUUUUCAAUUA
MMP0638	1	+	632816	Primary	44	10	1.14492	30	1.19867	UUCUUUUUUUUAAAUUUUUAAAAUAUUUUUCAAAA
MMP0639	7	-	632843	Primary	25	1373	1.49212	1991	1.49294	AAUAAUUCCUCUAAAUCUUUUUUAAUAUUUGUUUU
		-	632768	Secondary	100	17	1.33999	4	1.0201	UAAAAAAAAGAAAUGAAGUUUUUUAAUUAUUCAACC
		-	632798	Secondary	70	8	1.10526	3	1.01562	UUGACUUUUUUGAAAAAUAUUUUAAAAAUUUAAAAA
		-	632818	Secondary	50	144	2.19999	71	1.34299	AUAUUUGUUUUAAAUUAAAAUUGACUUUUUUGAAAA
		-	632827	Secondary	41	101	1.25964	1	1.0029	UCUUUUUUAAUAUUUGUUUUAAAUUAAAAUUGACUU
		-	632833	Secondary	35	83	1.13518	20	1.02729	UCUAAAUCUUUUUUAAUAUUUGUUUUAAAUUAAAAU
		-	632838	Secondary	30	1202	2.48578	1255	1.66262	AUUCCUCUAAAUCUUUUUUAAUAUUUGUUUUAAAUU
MMP0642	1	-	633814	Primary	33	8	1.2857	6	1.21428	UUCUAAAUUUCCAGUAGAUUACACCAUAACUAUUA
MMP0643	1	+	636033	Primary	53	54	1.42519	26	1.26	ACAUGAACCAUACAGUGUUUUACUCUUUUUAAUUU
MMP0644	1	-	635955	Primary	30	39	1.32231	25	1.20661	UAAUUUAACUUAAACUUCCUACAACUUUUUCAAAC
MMP0646	3	+	638295	Primary	61	29	1.29293	11	1.12222	GCAGUUUUCGCUCUUACUUAUUUCCAUUCUGUGGU
		+	638326	Secondary	92	8	1.13333	3	1.04478	GUGGUAUGUAAUUGCUUUUACUUCUUCUUUUGGUUC
		+	638404	Secondary	170	10	1.35713	4	1.06452	UAAUUCAUAACAUUCGUUUCUCUCGAUUUUUACAUU
MMP0647	2	-	638055	Primary	181	18	1.4186	2	1.02564	UAACAUUUCUACUGCCAUUUUAUCCAUUUUAGAAU
		-	638151	Secondary	85	13	1.10744	6	1.08219	AUCUUGCAUUUCUCCGACCAGACUUUUUGAUCGCCA
MMP0651	2	+	643703	Primary	40	51	1.76118	-11	0.847224	UAAUCUUUAAAUUAAAUUUUAAACAUUUUUAAAAA
		+	643681	Secondary	18	30	1.2027	12	1.1791	AAAUAAAGCAUAAUUUUCUUUUUUAAUCUUUAAAUU
MMP0654	5	+	646761	Primary	40	1505	2.8789	1119	2.15599	UUUCAUUUUUAACUAUUUUUUUAUUAUUUUAAAAU
		+	646771	Secondary	50	166	2.0641	7	1.02954	UAACUAUUUUUUUAUUAUUUUAAAAUCAGGUGGUUC
		+	646774	Secondary	53	9	1.10843	4	1.01762	CUAUUUUUUUAUUAUUUUAAAAUCAGGUGGUUCUUU
		+	646789	Secondary	68	9	1.15789	7	1.04217	UUUAAAAUCAGGUGGUUCUUUUGAAAGUUUUUAUAA
		+	646838	Secondary	117	9	1.28124	2	1.01538	AUUGUCCGAAAUUGAACUGCCGGAAAAUGCAAAGUU
MMP0655	3	+	647032	Primary	59	21	3.99957	23	1.26744	UAUUACUUUAGAAAAUAAUCAUCCAUUUUUAAGAU
		+	647005	Secondary	32	12	1.18182	13	1.06701	ACUUUAUUUAUAUACUAUUUUUACAAUAUAUUACUU
		+	647011	Secondary	38	12	1.30768	26	1.16993	UUUAUAUACUAUUUUUACAAUAUAUUACUUUAGAAA
MMP0656	1	+	647638	Primary	38	39	1.14338	287	1.46591	AAUGAUUAAUUCUCUUUUAAUUUUUAUUUUAAAGU
MMP0657	5	-	647646	Primary	29	207	1.39884	115	1.17372	ACUUUUUUAAAUUUUCAAAAAUACUUUUUUAAACU
		-	647551	Secondary	124	21	1.21875	23	1.03079	UCUUCUUGAAGUUUUACCGCUUCAUCCAUCCAAUCU
		-	647578	Secondary	97	16	1.11594	11	1.01392	UAACGUAACUAUUUAAAUAUUUUAAGUUCUUCUUGA
		-	647586	Secondary	89	36	1.22785	40	1.0492	UAAUCAUUUAACGUAACUAUUUAAAUAUUUUAAGUU
		-	647639	Secondary	36	163	1.58845	-76	0.893558	UUAAAUUUUCAAAAAUACUUUUUUAAACUUUAAAAU
MMP0658	1	-	648022	Primary	23	32	1.66665	7	1.06422	ACACUAACUUCUUUUUUAAAUUUUAUUUUUAACCA
MMP0660	1	-	650252	Primary	31	10	3.49938	2	1.14285	GCUUUUUUAAAUACUAAUUAUUUUGAUUUUGGUGA
MMP0664	1	+	654578	Primary	34	30	2.49993	2	1.0625	AUACUAUUUAAUUAAUAAUCCAAUAUUUUUGUGAA
MMP0665	1	+	655140	Primary	64	10	1.10309	4	1.04494	UUUUUAAAAAAUUAAAAAUUAAAAUUUUUUAUGCA
MMP0666	2	-	655116	Primary	23	72	1.576	24	1.26373	UGCAUAAAAAAUUUUAAUUUUUAAUUUUUUAAAAA
		-	655075	Secondary	64	50	1.81966	16	1.25396	ACAAAAUAAUUAUAAUAAAAAAUCUAUUUUUAAAGU
MMP0667	2	+	657833	Primary	38	42	2.27269	72	2.16127	AAAAAGAUUUAUGUGGUUUAAAUGGAAGAUUUGUA
		+	657813	Secondary	18	18	1.2093	28	1.15385	AAGAAGAAGAUAAUUCUUCUUAAAAAGAUUUAUGUG
MMP0668	2	+	658447	Primary	14	15	1.2027	20	1.18868	CGACUAUAUGUUAUAAUGAGGUGUAACAAUGGCAA
		+	658473	Secondary	40	8	1.10526	5	1.03788	ACAAUGGCAAGAAUGAAAGCUAGGUCCGCUAAAGGA
MMP0669	6	+	659149	Primary	26	1793	2.22222	1526	1.84872	AUAAUUCCUCUUUUUAAUUUUUUAAUUUUUAAGUA
		+	659158	Secondary	35	141	1.2981	78	1.15385	UCUUUUUAAUUUUUUAAUUUUUAAGUAAUCUUCUGU
		+	659168	Secondary	45	93	1.465	71	1.27203	UUUUUAAUUUUUAAGUAAUCUUCUGUUUUUUAAAGU
		+	659175	Secondary	52	15	1.10949	1	1.00405	UUUUUAAGUAAUCUUCUGUUUUUUAAAGUUUACCCU
		+	659195	Secondary	72	39	1.57352	32	1.16931	UUUUAAAGUUUACCCUUAUUUAUCCAUUAUUGUCUG
		+	659323	Secondary	200	8	1.18181	1	1.0073	UUAGAGUUUAUUCCACCAAUUACAAUAGGAUUUAUA
MMP0670	1	+	660267	Primary	168	25	1.64101	354	2.52585	CCGCACGGAAUAAAGGUAAGGCUUGAAGAUGGGCA
MMP0671	2	+	660356	Primary	53	17	3.12473	80	1.88888	UAUUUAUCUAAAUCUUUUAAUACUAUUUUUACAGA
		+	660323	Secondary	20	7	1.19444	4	1.01639	UUUUAAAAUAAGAAUAAUAUUUUUUAUUUUUAACUA
MMP0672	1	+	661348	Primary	22	11	1.61108	6	1.11321	AGGAAUAAUUAUUUAAAAUUUUUUUAUUUUGAAAU
MMP0674	2	-	662783	Primary	30	16	1.69562	2	1.09091	AUUACAUCAUACUUCCUUUUUUUAGUUAUUUAUUU
		-	662751	Secondary	62	8	4.998	3	1.3333	AUUUUUAACAUCCAUUUUGAUAUUAUUUUUUAAAAA
MMP0676	1	-	663530	Primary	20	17	1.80949	9	1.11392	CAAAAAUUAACUCUUAUUUUUUAAUUUUUUUAAAU
MMP0679	3	-	666694	Primary	31	34	1.26562	44	1.20276	CCAUAAUAAAAACUUUUUUUAAUUUUUUUUAAAAU
		-	666597	Secondary	128	7	1.16666	18	1.19355	UGUAAUUAUUUCGUUGAUUUUUUCCUUUUUUCUAUA
		-	666668	Secondary	57	30	1.48386	24	1.17143	UUUUUAAAAUAAAAUAAAAUAAAAUAAUUUUAAAAA
MMP0680	1	-	668365	Primary	28	66	2.49997	52	1.50485	AAGCAUUUAUAUGUUUCUAUUUCUUUUUUUAAGUA
MMP0681	1	-	668970	Primary	155	8	1.49997	36	2.16125	CACUGAAAAUAUUUCUUUUAGAAAAGGGCUCGUUA
MMP0682	3	-	670517	Primary	14	63	1.36842	24	1.06704	CAACGAAAAUAUCUAAUUUUUUUAAUUUUUAAAUC
		-	670451	Secondary	80	22	1.66665	54	1.18685	AAAAUAAAUCAUUUUAAUAUUCUUCUUUUUUGAGAU
		-	670508	Secondary	23	13	1.10317	-4	0.988506	AUAUCUAAUUUUUUUAAUUUUUAAAUCAAGUCAUUU
MMP0683	1	-	671119	Primary	78	10	1.15873	-5	0.95	UUAUAUAAAUAUUAAAAACCUAACUUUUUUAACUA
MMP0684	4	+	673036	Primary	60	80	1.38277	222	1.26118	UUUUUUUUAUUUAUCUAUUUUAAAAUUUUUAAUAA
		+	673045	Secondary	69	17	1.11644	14	1.02326	AUUUAUCUAUUUUAAAAUUUUUAAUAAUGCUUUUUU
		+	673049	Secondary	73	46	1.57499	120	1.3069	AUCUAUUUUAAAAUUUUUAAUAAUGCUUUUUUAUAG
		+	673056	Secondary	80	7	1.34998	1	1.00806	UUAAAAUUUUUAAUAAUGCUUUUUUAUAGUUGUAGU
MMP0685	1	+	673912	Primary	173	22	1.10377	6	1.02899	CGCAUACGCAGAGUAGCAUCAGGAAUUUGAAUUGU
MMP0686	2	+	675002	Primary	44	84	2.86662	-2	0.951221	UAAAAAGUUACCUAUAAAUAUCAUUUUUUUAAAAA
		+	675011	Secondary	53	12	2.09081	0	1	UACCUAUAAAUAUCAUUUUUUUAAAAAAGAUUAUUA
MMP0687	3	+	675768	Primary	66	91	1.46428	30	1.11952	AAAAAUAAAAAAAUUAAUUAUUCAAUUUUUACUUC
		+	675730	Secondary	28	56	1.15259	9	1.03136	UAAAAAUAAAAUUCUUUUUUUAAAAAUUAUUUAAAA
		+	675779	Secondary	77	16	1.1194	6	1.02927	AAAUUAAUUAUUCAAUUUUUACUUCGACAUUUAAAA
MMP0689	3	+	678806	Primary	41	126	6.0398	145	1.97972	AAAUCUUUUUUUCUAUUUUUUGAUUAUUUUAAAAC
		+	678797	Secondary	32	58	1.2377	55	1.13317	UAAAAAUCUUAAAUCUUUUUUUCUAUUUUUUGAUUA
		+	678812	Secondary	47	8	1.5333	0	1	UUUUUUUCUAUUUUUUGAUUAUUUUAAAACUAAAAA
MMP0692	4	-	680121	Primary	49	382	3.34354	893	2.10383	UCAAUUUUACUUUUUUCAGUUACUUUUUUUAAAUU
		-	680094	Secondary	76	9	2.12486	36	1.36734	UUUUAAAUUCGUUUCAUAAUAUUAUUAUAUUGGUGA
		-	680108	Secondary	62	8	1.25806	4	1.01826	UUUUCAGUUACUUUUUUUAAAUUCGUUUCAUAAUAU
		-	680112	Secondary	58	31	1.58489	4	1.01504	ACUUUUUUCAGUUACUUUUUUUAAAUUCGUUUCAUA
MMP0693	3	-	681160	Primary	35	17	1.44736	313	1.2494	UUAAUAUAUAAUAAACAAUAAUACUAUUUUAUUGC
		-	681152	Secondary	43	9	1.69225	80	1.13675	AUAAUAAACAAUAAUACUAUUUUAUUGCCUUUAAAA
		-	681157	Secondary	38	10	1.35713	299	1.37896	AAUAUAUAAUAAACAAUAAUACUAUUUUAUUGCCUU
MMP0694	4	-	682126	Primary	19	34	1.23448	0	1	GAUUGAGAUAAGUAUUCUUUUUUUAUUUUUAAUUC
		-	682024	Secondary	121	11	2.09989	22	1.2268	AUUUCAAAAUAUUCGCUAUUUUUUUAGUUUUAAUUA
		-	682030	Secondary	115	6	1.26086	12	1.10345	UGGAUUAUUUCAAAAUAUUCGCUAUUUUUUUAGUUU
		-	682097	Secondary	48	21	1.34999	6	1.08	UUAAUUCGAAUAAUAGAUAUACCCCUUUUUUCAAAA
MMP0695	4	-	684121	Primary	66	537	3.64531	246	1.44972	AGUAUUCUUUUCAAAUUUUUUUUAUGUUUUAACAC
		-	684108	Secondary	79	11	1.28947	2	1.00587	AAAUUUUUUUUAUGUUUUAACACAGAUUAAUCAAUU
		-	684110	Secondary	77	7	1.13461	26	1.07407	UCAAAUUUUUUUUAUGUUUUAACACAGAUUAAUCAA
		-	684114	Secondary	73	37	1.43023	1	1.00262	CUUUUCAAAUUUUUUUUAUGUUUUAACACAGAUUAA
MMP0696	1	-	684907	Primary	35	9	1.59996	1	1.05	AAAAACUUACGCCAAAUUUCUUUUAUUUUUAAAAA
MMP0698	2	+	689861	Primary	62	40	1.52631	5	1.04425	UUUUAAAAAUAAAAAUUUAAAAUAAUUUUUUAAGA
		+	689870	Secondary	71	10	1.62496	12	1.20339	AUAAAAAUUUAAAAUAAUUUUUUAAGAAUUUAAGAA
MMP0701	3	+	692452	Primary	27	14	1.82348	27	1.47368	UAAUGUAAAUAUUAUUUUUAUAAUUUUUAUGGUGU
		+	692443	Secondary	18	6	1.10526	13	1.11111	UUCAGAUUUUUAAUGUAAAUAUUAUUUUUAUAAUUU
		+	692450	Secondary	25	12	1.33332	11	1.11458	UUUUAAUGUAAAUAUUAUUUUUAUAAUUUUUAUGGU
MMP0702	4	+	693453	Primary	113	22	1.78569	27	1.18493	UUUUCAUCUAUUUUUCCGCUUUUAAUUUUUGUAGU
		+	693377	Secondary	37	17	1.18085	14	1.08589	AAUUUUGAAGAUAUAUCUUUUUCAUUUUUUUAAUGA
		+	693385	Secondary	45	8	1.10126	-6	0.966102	AGAUAUAUCUUUUUCAUUUUUUUAAUGAUUUCAGAG
		+	693409	Secondary	69	14	1.23728	5	1.02688	AUGAUUUCAGAGGAAUUUAAAUUUUCUUUUUGAAUG
MMP0704	3	-	694390	Primary	18	133	1.5991	131	1.32346	AAAAAAGAAUAACUUAAAUUUUUUAUUUUUAUCCC
		-	694378	Secondary	30	40	2.02562	65	1.6842	ACUUAAAUUUUUUAUUUUUAUCCCUGAUUUUAGGUG
		-	694384	Secondary	24	27	1.2477	9	1.03659	AGAAUAACUUAAAUUUUUUAUUUUUAUCCCUGAUUU
MMP0706	2	-	696379	Primary	96	15	1.59998	5	1.15624	UCGGGAACUAACUACUAAAAAAUUUUUUUUGAUUC
		-	696331	Secondary	144	6	1.5454	3	1.09677	AUUAUUCUGAAAAUAUGGAUAAAAUCUUUUUUGAAG
MMP0708	3	+	700044	Primary	105	50	2.02039	32	1.45714	AAAUAACCAAAAACUAUUAAUAUAUUUUUUAUGAG
		+	699999	Secondary	60	26	1.19259	3	1.02586	AUUGAAAUAAUUUUUAUUUUUUAAAUUAUUUAGCUU
		+	700097	Secondary	158	6	1.13953	-1	0.972223	CUCAAAAUUAAGUAAUUAUAAUUUGAGUAUGCCCUC
MMP0709	4	+	701013	Primary	30	384	2.23871	309	1.54884	CUUAAAAUUUUUCUUCUUUUUUAACAUUUUAAUAA
		+	701021	Secondary	38	36	1.28346	16	1.04893	UUUUUCUUCUUUUUUAACAUUUUAAUAAUAUAAAUU
		+	701040	Secondary	57	37	1.80433	66	1.40993	UUUUAAUAAUAUAAAUUUAAAAUUCUAUUUUGAUAA
		+	701049	Secondary	66	11	1.43998	4	1.03738	UAUAAAUUUAAAAUUCUAUUUUGAUAAUCUUUAAAU
MMP0712	1	+	705852	Primary	32	15	1.65215	0	1	UUAAAUAAAUUCACUUAUUUUAAAUUUUUUCAGGU
MMP0714	1	+	708589	Primary	35	12	1.47998	29	1.6744	AUAUCAUGAUUUGGAAUGAAACUAUUGAAUGCAUG
MMP0716	2	+	710357	Primary	55	80	1.74073	67	1.36413	UUUUUAAAGUUUAUUUCUUUUUCUUCUUUUAAAAA
		+	710367	Secondary	65	7	1.13461	1	1.0082	UUUAUUUCUUUUUCUUCUUUUAAAAAAUGGUUGAUA
MMP0718	5	+	711666	Primary	81	128	1.64321	22	1.10732	AAGGAUAAGCCUUUCUUUUCCAAAAUUUUUACUUU
		+	711670	Secondary	85	21	1.12651	1	1.00532	GAUAAGCCUUUCUUUUCCAAAAUUUUUACUUUCUGA
		+	711673	Secondary	88	41	1.42268	12	1.06936	AAGCCUUUCUUUUCCAAAAUUUUUACUUUCUGAACU
		+	711704	Secondary	119	9	1.15517	1	1.00685	GAACUGGAUUCUAUUGUAGAAUCUAAAAAUUAUUCC
		+	711719	Secondary	134	11	1.32352	1	1.0084	GUAGAAUCUAAAAAUUAUUCCAGCAGGAGCGAACUC
MMP0719	3	+	712043	Primary	13	189	2.60168	91	1.65467	ACAUUAUUAUUUUUUAACAAAUACUUUUUUAUGUU
		+	712047	Secondary	17	15	1.17857	0	1	UUAUUAUUUUUUAACAAAUACUUUUUUAUGUUCAAU
		+	712066	Secondary	36	14	1.36841	4	1.07407	ACUUUUUUAUGUUCAAUAUUACUAAAUUAUUUAAUA
MMP0720	2	+	713955	Primary	32	29	2.11534	52	1.48148	UCCUAAAAUCCAUAUUAAAUUUUAAUUUUUAAAAA
		+	713965	Secondary	42	7	1.46664	3	1.01639	CCAUAUUAAAUUUUAAUUUUUAAAAAUUACUUAAAA
MMP0723	1	+	715766	Primary	23	25	1.65788	34	1.24817	AUGUUAAUUUUUACUUUUUUUACACCUUUUCAAAA
MMP0727	1	-	717489	Primary	15	18	1.81814	5	1.15624	AAAAAAAUCAAAUAAUCUAUUUUUUAUUUUAAAGU
MMP0729	1	-	720905	Primary	127	7	1.87489	12	1.66663	AACUUGAAAAAAAGAGUUAGUAGCUACUUUAACAA
MMP0734	2	+	727868	Primary	64	42	1.54545	9	1.24324	AAUAUACAUAUAUUGUCUUUAUACUCUUUUCUGAU
		+	727878	Secondary	74	12	1.39999	0	1	AUAUUGUCUUUAUACUCUUUUCUGAUAUGUUAUGCA
MMP0735	1	+	728966	Primary	167	40	1.49999	14	1.17721	CGAUUUUUUCCCAUAUAUCUCCAUCUUUUUCGAAA
MMP0737	6	+	730259	Primary	54	156	1.52	89	1.16152	AAAGAAAUUUUGUAUUUUAUUUUUUAUUUUCAGUU
		+	730225	Secondary	20	106	1.15565	18	1.02326	UCGGAACUUAAAUUAAUUUUUUUUAAAUUUUAAAAA
		+	730254	Secondary	49	94	1.19462	70	1.10432	UUAAAAAAAGAAAUUUUGUAUUUUAUUUUUUAUUUU
		+	730264	Secondary	59	17	1.10119	6	1.01304	AAAUUUUGUAUUUUAUUUUUUAUUUUCAGUUUAUUU
		+	730270	Secondary	65	27	1.26213	89	1.2947	UGUAUUUUAUUUUUUAUUUUCAGUUUAUUUUAUUUA
		+	730273	Secondary	68	14	1.16092	21	1.07985	AUUUUAUUUUUUAUUUUCAGUUUAUUUUAUUUAGUU
MMP0738	1	-	730219	Primary	68	26	1.12745	13	1.0268	UAAAAUACAAAAUUUCUUUUUUUAAAAUUUAAAAA
MMP0739	1	-	732054	Primary	100	15	1.65215	3	1.2727	CUGAAAAUUCCAUUAAAAUUACAAUUUUUUAGCAU
MMP0756	2	+	749651	Primary	113	9	1.37498	1	1.04	UUUUUUAUUCUUUCUUCUUCAAUUUCUUUUAAAUC
		+	749646	Secondary	108	6	1.13333	0	1	UUUAACUUUUUUAUUCUUUCUUCUUCAAUUUCUUUU
MMP0760	1	-	752225	Primary	25	37	3.64267	8	1.20512	AAUAAUUUUUUAAAUUUUAUAACUAUUUUUAGUAA
MMP0761	2	+	753043	Primary	20	11	1.42306	4	1.15999	CAUUGAUUAAAAAUACUCUUUUUUCUUUUUUAGUA
		+	753045	Secondary	22	7	1.49996	7	1.58329	AUUGAUUAAAAAUACUCUUUUUUCUUUUUUAGUAAA
MMP0770	1	+	762473	Primary	28	22	1.68748	5	1.27776	AACUAAAUAUUCCCUUUCAAAGUUUCUUUUAAAAA
MMP0785	2	+	776618	Primary	52	9	1.33332	6	1.13953	UUUAAAAAUUUAAAUUCGUUCAUUUUUUUUGAAAU
		+	776661	Secondary	95	6	2.19976	1	1.02778	UGUUUUAACUUUAAACAAAAAUUAAUAUUUUAAUCA
MMP0788	1	+	781014	Primary	34	13	1.99992	14	2.39986	AUUUAUAUUCUCUAUUUAAUUCUAUUUUUUGAUAU
MMP0790	1	+	783842	Primary	35	8	4.998	4	1.79984	ACUUCUAAUUUAUUUAAUUUCUUUUUUUUCGAAAC
MMP0792	1	+	785777	Primary	88	6	2.19976	3	1.15789	GGACAAUCCCCCUUACUAACACUAAAUACCCCGAA
MMP0798	1	-	790639	Primary	23	6	6.99401	0	1	AAAUUAAUAAUACUAUUUUUUAAAUUUUUAAAACA
MMP0799	1	+	792227	Primary	9	15	3.14255	24	2.41168	AACGGACUAGUCAAAAACUAAUUUUUUUUUAACUA
MMP0809	1	+	802422	Primary	57	39	2.9499	27	1.59999	UUUAAAAUUCAACUAUUCUUUUUAUUUUUCAAUCC
MMP0811	1	-	803062	Primary	47	6	1.22221	0	1	AAAACAUUAUUAUAUUUUCAGUAUCUUUUUUAGUA
MMP0812	1	-	803671	Primary	31	25	3.77747	25	2.24994	UAACUUAUUUUUCUUUUUUUACAAUAUUUUGGAAU
MMP0814	1	-	807392	Primary	40	13	1.51998	33	2.31995	AAAAUAAAAUUUUCUUUUUUUCUGAUUUUUAACAU
MMP0816	4	-	811193	Primary	72	21	2.1666	18	1.58063	UUUCGAUUCUAUUUUUUAUUUAAAAUUUUUAAUAU
		-	811203	Secondary	62	9	1.15789	2	1.02778	UUUUAAAAUAAUUUCGAUUCUAUUUUUUAUUUAAAA
		-	811206	Secondary	59	14	1.20895	23	1.28395	UAAUUUUAAAAUAAUUUCGAUUCUAUUUUUUAUUUA
		-	811252	Secondary	13	16	1.14679	16	1.11189	AAAGAAAUUGAACUUUAAUAUUCUAUUUUUUAAUCA
MMP0826	2	-	821455	Primary	194	23	1.24731	7	1.04093	UUUAACAUUUUUGACCUCAACUAUUUUUUUAUAUU
		-	821449	Secondary	200	8	1.10256	6	1.04	CAUUUUUGACCUCAACUAUUUUUUUAUAUUUUAAAA
MMP0827	2	+	822551	Primary	61	17	2.41655	4	1.49994	UAAAUCUAAUAUCUUCUUUUUUAGAUUUUUCAAGC
		+	822509	Secondary	19	8	1.17391	2	1.11111	GAAAUGAAAUAAUUUUAUUUUUUAUUUUAUUCGAUU
MMP0839	2	-	833825	Primary	194	10	1.15384	5	1.02941	UAAUCUUUCAUUUAGUAUAAUUUUAUUUUUAUGAA
		-	833823	Secondary	196	7	1.12727	5	1.03049	AAUCUUUCAUUUAGUAUAAUUUUAUUUUUAUGAAAA
MMP0841	1	+	836690	Primary	34	10	2.66639	71	1.9861	AAUCUUAAAUUCUUUUUUUAAUAUAUUUUUAAGUA
MMP0843	1	+	837473	Primary	32	15	1.74996	6	1.20689	AUUAAUAAACUUUAUAAUUUAUCUUUUUUUAAAUA
MMP0844	1	+	838283	Primary	44	14	1.63634	12	1.15789	AUACAUUUAUUCAUCUUUUCAUAUUUUUUUAGCUG
MMP0846	2	+	839198	Primary	33	18	2.38451	21	1.24138	AGAUUAUCUUUUUUUAAUUUUUAAUUUAUUCGGGA
		+	839190	Secondary	25	13	1.3611	18	1.14062	UUUUAAAAUAGAUUAUCUUUUUUUAAUUUUUAAUUU
MMP0850	1	+	842730	Primary	165	6	1.23076	0	1	CGCCGAUUAUGGUAACAGGCGCUUUUGAAUAUUUU
MMP0851	3	-	842577	Primary	32	12	1.26666	4	1.05	AAAAUAAAAAAAAUAAAUCCGCUAUUUUUUUAAUU
		-	842539	Secondary	70	6	1.4615	7	1.175	UAAAUUAUUUUAUGUUAUAAUUAUUAUUUUUCAAAG
		-	842559	Secondary	50	7	1.30434	5	1.1	UCCGCUAUUUUUUUAAUUUAUAAAUUAUUUUAUGUU
MMP0855	1	+	845689	Primary	37	8	1.66661	1	1.14284	AACCCCAAAAUUACCCUUUAAAAAUUUUUUAGGAG
MMP0859	1	+	851427	Primary	52	11	1.42306	3	1.3333	UUCGGAGCUGCCACACAUUUUCUUAUUUUUGAAAU
MMP0860	2	+	851685	Primary	24	10	1.52629	1	1.12498	GCCUAAAUUAUUUAUUAAUUAUCACAUUUUAGUUA
		+	851692	Secondary	31	6	1.59994	0	1	AUUAUUUAUUAAUUAUCACAUUUUAGUUAUUAUGCG
MMP0862	2	+	854396	Primary	33	15	1.5769	17	1.09392	UUCAACUCUUUUAAUUUUUUAAUUUUUUUUAAUCA
		+	854421	Secondary	58	6	1.74991	60	1.69767	UUUUUUAAUCAACUUCAAUUUUCUCUUUUUUGAUAA
MMP0865	2	-	856184	Primary	38	34	1.77271	71	1.3287	UUUGCUUUUUUUAUUUUUUAUUUUCUUUUUAAAAA
		-	856176	Secondary	46	6	1.31577	16	1.1039	UUUUUAUUUUUUAUUUUCUUUUUAAAAAUUCAAUAU
MMP0866	5	-	857768	Primary	28	597	1.86899	281	1.37517	AAAUAUCAUUUAUGAAACUUCUUUUUUUUUGAAAA
		-	857689	Secondary	107	14	1.99993	14	1.09524	AAAACCUUAUAUCUGCUAAAUUCAUAUUUUUGAGAU
		-	857712	Secondary	84	14	1.32557	13	1.14444	AAUGUUUUUCAAAUUUUUUUCGAAAAACCUUAUAUC
		-	857723	Secondary	73	71	1.79774	107	1.49537	AAUUAUUUUUAAAUGUUUUUCAAAUUUUUUUCGAAA
		-	857760	Secondary	36	51	1.1474	8	1.01613	AUUUAUGAAACUUCUUUUUUUUUGAAAAUUUUAAAA
MMP0867	2	-	858697	Primary	2	70	1.44025	80	1.25974	CCGUAACCUCGUGGGAUCUAAAAUAUAAUAAAAAG
		-	858690	Secondary	9	27	1.69229	4	1.03175	CCUCGUGGGAUCUAAAAUAUAAUAAAAAGGUGAAUU
MMP0870	1	+	862608	Primary	24	12	6.997	3	1.3333	AAAUAAUAUUUAUUUAAGUUUAAUUUUUUUAAGUC
MMP0872	2	+	864871	Primary	17	17	1.22078	7	1.08536	UUUUACGUAUUAGUUCUUUUUUCUUUUUUUAAAAU
		+	864880	Secondary	26	17	1.42499	11	1.23404	AUUAGUUCUUUUUUCUUUUUUUAAAAUAUUUAGAGA
MMP0874	2	-	866621	Primary	40	67	1.42675	39	1.27083	UAAUUAACUUUUUUGAAUUUUUAAUUUUUUCAAAU
		-	866611	Secondary	50	22	1.23656	9	1.07964	UUUUUGAAUUUUUAAUUUUUUCAAAUGUUUUAUAAG
MMP0875	1	+	869581	Primary	69	9	1.28124	4	1.15999	AUCAACCCAUUCUUCUGUAAUAUAUUUUUCAUAAA
MMP0876	1	-	869511	Primary	11	18	1.5294	8	1.27585	AGAAAAAAUUAAAAAAUAAUUUACUUUUUUAAAUC
MMP0878	1	+	872077	Primary	154	136	2.07086	119	1.63978	CAUCCAUAAUGUACACCCCCCAGUGACAUUAUGUA
MMP0879	2	-	872168	Primary	27	70	1.61403	24	1.16107	UAAUCCAAAAUAUCUAUUAUAUCCUUUUUUACGGA
		-	872164	Secondary	31	11	1.2037	0	1	UCCAAAAUAUCUAUUAUAUCCUUUUUUACGGAAUAU
MMP0881	1	-	874919	Primary	27	24	2.19994	4	1.15999	UAAAUUUUAAUUUAAUUAUUCAUUUAUUUUGAUGU
MMP0883	2	-	876268	Primary	103	48	1.51063	11	1.08397	UUAUCAAUAUAUUCGUUAUUUCCAAUUUUUAGAAC
		-	876258	Secondary	113	18	1.31034	14	1.14141	UAUUCGUUAUUUCCAAUUUUUAGAACUUUUUCAGAA
MMP0886	1	-	879262	Primary	33	7	1.13207	0	1	UUGAAUGUUCAUCCAAAUUUUGACAUUUUUUGACU
MMP0887	2	-	880165	Primary	47	33	2.43472	154	1.56617	AUAUUUGUAUUAUUUUCUCCUAUUUUUUUCAAAAU
		-	880160	Secondary	52	6	1.39997	3	1.01229	UUGUAUUAUUUUCUCCUAUUUUUUUCAAAAUAAUAU
MMP0888	6	-	880606	Primary	30	302	2.27426	271	1.71883	AAUUUUUGAUUUGUUUUUUUUCAAUUUUUUAAAAU
		-	880564	Secondary	72	7	1.19999	1	1.00917	AGAUUAAGGGUUCGUUUUUAUUACAUAUUUUUAUAU
		-	880592	Secondary	44	20	1.32786	0	1	UUUUUUUUCAAUUUUUUAAAAUUUCAAAAGAUUAAG
		-	880599	Secondary	37	51	1.39843	24	1.12834	UGAUUUGUUUUUUUUCAAUUUUUUAAAAUUUCAAAA
		-	880603	Secondary	33	21	1.11413	11	1.03655	UUUUUGAUUUGUUUUUUUUCAAUUUUUUAAAAUUUC
		-	880615	Secondary	21	100	1.1105	89	1.09989	AGAAAACUAAAAUUUUUGAUUUGUUUUUUUUCAAUU
MMP0889	1	-	880874	Primary	81	21	1.34999	22	1.20755	UGCAGCACCAUUUUUAGCUUCAGGGGACCCCGAUG
MMP0890	3	+	884164	Primary	130	42	2.909	265	5.34419	UAAAUCAGUGAAAUAUUCUUUAAUUAGAUAUAAAG
		+	884054	Secondary	20	14	1.11667	-17	0.976965	AUUUUAAUUAAAAUUGAAAUAUAAAUUUUUUAAAAA
		+	884135	Secondary	101	16	1.13793	1830	1.51117	CAGUGAAGUCGGCACUCAUCAUUGCAUAAUUAAAUC
MMP0891	2	+	884855	Primary	32	8	1.19047	6	1.10169	UUCAUUUAAUUAGUUCUUUUUUCAAUUUUUAAAAG
		+	884874	Secondary	51	6	1.23999	4	1.06667	UUUUCAAUUUUUAAAAGUCCAUUCAUCUUUUAAAAU
MMP0894	5	+	888137	Primary	22	91	1.27083	76	1.24595	UUGAAUAAUUCUUUAAAAUAUCUCUUUUUUAAAUU
		+	888149	Secondary	34	27	1.10757	9	1.0383	UUUAAAAUAUCUCUUUUUUAAAUUAAAUUCUCUACC
		+	888175	Secondary	60	42	1.4	39	1.312	AUUCUCUACCUACACAAUAGCUAUUUAUUUUCAAAC
		+	888181	Secondary	66	7	1.10606	4	1.04	UACCUACACAAUAGCUAUUUAUUUUCAAACUUCAUU
		+	888195	Secondary	80	13	1.49998	3	1.04545	CUAUUUAUUUUCAAACUUCAUUAUUCAUUAUAUCAA
MMP0895	1	+	888954	Primary	122	7	1.30434	19	1.13287	UAAAUUUGCAGCCUAUCUUUUUUAUUUUUUGAUAC
MMP0897	1	+	891504	Primary	52	37	1.99997	25	1.26041	AAAUUACUAUUUUUUAAAUUUUUAAUUUUACAAAA
MMP0898	2	-	891507	Primary	38	40	1.60605	117	1.48148	UAAAAUAGAUAUUUUCUUUUUUAGCUUUUUUGUAA
		-	891504	Secondary	41	8	1.27585	5	1.03425	AAAUAGAUAUUUUCUUUUUUAGCUUUUUUGUAAAAU
MMP0901	2	-	896196	Primary	83	26	1.60464	12	1.04706	UUUAAAGCCACCUACAAGUCUUUUUACUUUAAAUC
		-	896201	Secondary	78	8	1.10526	2	1.00722	AUAGCUUUUAAAGCCACCUACAAGUCUUUUUACUUU
MMP0902	2	-	897337	Primary	46	41	2.02497	71	1.17317	CCUACUAUUUUGAAUAUUUAUUUACAUUUUAAAAU
		-	897315	Secondary	68	17	2.2142	140	1.69651	UUACAUUUUAAAAUGUGUGAGAUGAGACUAUGAGGA
MMP0904	3	-	898246	Primary	50	19	1.14504	7	1.05343	UAGGAGGAUUAUUUUUUAAUCGCUUAUUUUAAAUA
		-	898179	Secondary	117	6	1.13636	0	1	CCCUACUGAAUUAAAUUCUUUUCCGCAUUUUGGACA
		-	898188	Secondary	108	16	1.24615	12	1.12	UAUCUUUUUCCCUACUGAAUUAAAUUCUUUUCCGCA
MMP0908	1	+	902076	Primary	185	52	2.3333	12	1.09302	UCCGUAACGUGCGCCCUUGUAGCUUCUUUUGGAUC
MMP0909	1	+	902452	Primary	64	17	1.16831	19	1.10053	AUUAUUACAUUCCUAAAAUUUCCCUAUCUUCGGUA
MMP0910	1	-	902396	Primary	31	10	1.20408	12	1.08824	AAUUUAAAUUAUUUUUUUAAAUCAUUUUUUAAGUA
MMP0911	1	-	902878	Primary	21	32	1.91426	57	1.35185	AAAUUAUAAUACAUUCAUAAUUUAUUUUUUAAUUA
MMP0912	1	-	903510	Primary	46	29	5.14227	12	1.39999	CUAUUUUUCAUUAAAGUUUUUUUAAUUUUUAACAA
MMP0915	2	+	905662	Primary	74	30	1.21898	39	1.08387	UUAGGUAGUAUCAUCGGCACCGUUGAUGAUAUCGU
		+	905646	Secondary	58	22	1.12865	4	1.00742	GAUCCAUAGUUGGCAGUUUAGGUAGUAUCAUCGGCA
MMP0916	8	+	905854	Primary	21	1070	2.61144	1736	1.77535	AAAGCUUAAAUUAUUUCUCAUACUAUUUUUAAAAA
		+	905863	Secondary	30	93	1.35094	26	1.02116	AAUUAUUUCUCAUACUAUUUUUAAAAAUGAUUUACA
		+	905882	Secondary	49	48	1.28742	109	1.16465	UUUAAAAAUGAUUUACAAAAAUACCCAUAUUAUAUG
		+	905884	Secondary	51	16	1.11111	14	1.02167	UAAAAAUGAUUUACAAAAAUACCCAUAUUAUAUGGU
		+	905889	Secondary	56	29	1.29293	51	1.09604	AUGAUUUACAAAAAUACCCAUAUUAUAUGGUGGUUU
		+	905892	Secondary	59	20	1.32258	24	1.0553	AUUUACAAAAAUACCCAUAUUAUAUGGUGGUUUUAA
		+	905895	Secondary	62	11	1.22916	43	1.11717	UACAAAAAUACCCAUAUUAUAUGGUGGUUUUAAUGA
		+	905904	Secondary	71	15	1.5769	6	1.01948	ACCCAUAUUAUAUGGUGGUUUUAAUGAAAUUUACAA
MMP0917	6	+	906792	Primary	62	29	1.16571	34	1.07188	UUAAAAAAAAAGCUUAAAAUUUUAUUUUUUCAAUU
		+	906832	Secondary	102	26	1.23423	15	1.03145	AUUCUUCAAAAAAUUUAUUAAUUUCUUUUUUAGAAU
		+	906840	Secondary	110	13	1.13542	-1	0.997951	AAAAAUUUAUUAAUUUCUUUUUUAGAAUACCCGUGU
		+	906843	Secondary	113	9	1.10976	-5	0.98994	AAUUUAUUAAUUUCUUUUUUAGAAUACCCGUGUUUU
		+	906851	Secondary	121	10	1.17857	25	1.05353	AAUUUCUUUUUUAGAAUACCCGUGUUUUUUUGCAAC
		+	906873	Secondary	143	6	1.13636	8	1.01839	UGUUUUUUUGCAACUGCAUAGACCAUUUUUUCGCUU
MMP0919	1	-	908338	Primary	77	30	2.07139	39	1.5909	AUAUUAAUAUUAAUAAAAAUUACUUUUUUUAAAGA
MMP0920	3	-	909193	Primary	21	52	1.91227	22	1.19643	GGAACUUAAAUUUUUAAUUUAACUUUUUUUAGUGA
		-	909133	Secondary	81	10	1.71423	23	1.57499	GUAAAAUAAUUGAUGUAAUAGACGAAAGUCCAACGG
		-	909181	Secondary	33	10	1.3846	21	1.31818	UUUUAAUUUAACUUUUUUUAGUGAUUAUUAUGGAAA
MMP0923	2	+	912682	Primary	138	25	1.75755	24	1.16667	GCUGUGUAAACAGCGCAUUUUUCCUUUCUCAUGAU
		+	912723	Secondary	179	6	1.59994	42	1.83998	AAGAGAUACUAUUUUUUACAGUGUCAACUAUGGCUC
MMP0929	1	+	919458	Primary	45	13	1.33333	14	1.0814	AGUAAUUUUUUUAAUUUAUUUUUAAUUUUUGAUAA
MMP0931	2	-	920275	Primary	47	59	3.35991	66	1.54098	GUUUUAUUCUUACACGACUUUUUAUUUUUUCAGAU
		-	920268	Secondary	54	7	2.39972	-3	0.972728	UUCUUACACGACUUUUUAUUUUUUCAGAUGUUAUAC
MMP0933	1	-	921639	Primary	17	6	2.19976	31	1.45588	AUUGUUUCCCUAAUUGAGAGGUUUUACCAUGAAGU
MMP0934	2	-	922046	Primary	66	13	1.61902	17	1.32075	UAUUCUAAAAAUAACUUUAAACUUGUUUUUAUUUA
		-	921987	Secondary	125	6	1.74991	9	1.2093	UUGUAAAAACAAUGAUUGUAGAUGAUUCUGCAUUUA
MMP0937	3	+	925587	Primary	51	18	1.21176	9	1.06081	AUUUAUCCAUACUUUUUUAAUUUUUUAUUUAAUUA
		+	925583	Secondary	47	17	1.13077	7	1.03846	UAAUUAUUUAUCCAUACUUUUUUAAUUUUUUAUUUA
		+	925591	Secondary	55	7	1.10606	4	1.03053	UAUCCAUACUUUUUUAAUUUUUUAUUUAAUUACCCA
MMP0938	1	-	925507	Primary	83	23	1.31944	17	1.11564	UUAUCUGAAUACAUCUUCUUCUUUUUUUCUGAUUA
MMP0939	1	-	926374	Primary	5	18	1.43901	11	1.08871	AAAAAUAAUUAAAACACUUAUUUAAUUUUUACGGG
MMP0942	2	-	928961	Primary	39	7	1.49996	2	1.07143	ACCCCCGAAUAAUUUUAAAAUUAAUUUAUUUUAAU
		-	928975	Secondary	25	6	1.23999	1	1.02857	AUUUAAUUAAAAUCAACCCCCGAAUAAUUUUAAAAU
MMP0946	5	-	933263	Primary	23	66	1.27966	13	1.07975	UGGAUAAAUUUUAUCUUUUUUUAAAUUUUUAAAAU
		-	933156	Secondary	130	6	1.10169	7	1.04516	CUUUUUAUAUAUUCAUCGAAAUUUCCGUUUUCAAAU
		-	933174	Secondary	112	10	1.11236	12	1.06977	CUGUAUUUUUCAAGAACUCUUUUUAUAUAUUCAUCG
		-	933214	Secondary	72	14	1.12389	2	1.0129	GAAUUAUUCUUUUAAUUUCCAGUCAAUUUCUAACAA
		-	933225	Secondary	61	14	1.10145	4	1.02597	UAAAAAUAAAAGAAUUAUUCUUUUAAUUUCCAGUCA
MMP0947	2	-	934851	Primary	27	21	1.48836	4	1.19999	UAAAAAUUUGAUUUUGACUCUUUAUUUUUUAGAUU
		-	934819	Secondary	59	6	1.18749	0	1	GAUUGGAUAAAUAUCUCUUAAAAAAUCUUUUUAUAG
MMP0948	5	+	936427	Primary	45	135	1.87096	82	1.37788	AUUACAUAGUUAUUUUUUAAAUUUUAUUUUCAGGU
		+	936422	Secondary	40	68	1.19155	35	1.10417	AAAUAUAUUACAUAGUUAUUUUUUAAAUUUUAUUUU
		+	936432	Secondary	50	36	1.65453	5	1.02778	CAUAGUUAUUUUUUAAAUUUUAUUUUCAGGUGGAUA
		+	936436	Secondary	54	7	1.17948	1	1.00565	GUUAUUUUUUAAAUUUUAUUUUCAGGUGGAUAUUUU
		+	936440	Secondary	58	9	1.34614	1	1.00787	UUUUUUAAAUUUUAUUUUCAGGUGGAUAUUUUGAAA
MMP0949	1	+	937897	Primary	123	31	1.86109	154	2.37499	GACUCCAAAAAAGAAGAUAGUGUAAACGCUGUAUC
MMP0952	6	-	940211	Primary	30	203	1.33443	450	1.26946	UUUGUCUGAUUAUAACUUUUUUUAAAUAUUAAUGC
		-	940121	Secondary	120	10	1.39998	38	1.15322	AAUUUACAUGAAUAAUAUCAUAUAAAUUAUUAAAAA
		-	940185	Secondary	56	15	1.27272	24	1.06818	AUAUUAAUGCUUUUUUAAAACAGUUACUUUUAAAAU
		-	940191	Secondary	50	16	1.21621	0	1	UUUUAAAUAUUAAUGCUUUUUUAAAACAGUUACUUU
		-	940201	Secondary	40	154	1.62096	299	1.33483	UUAUAACUUUUUUUAAAUAUUAAUGCUUUUUUAAAA
		-	940218	Secondary	23	146	1.16591	398	1.1599	GCAAAUAAUUUGUCUGAUUAUAACUUUUUUUAAAUA
MMP0954	1	-	941792	Primary	30	8	1.66661	1	1.04167	UUUUUCUUUUUUUUUCAUUUUGAAUUUUUUAAAUC
MMP0955	7	+	943739	Primary	21	33	1.3	20	1.38461	AUUAUUUAAACUGCUUUUUUCAAUUAUUUUAUUAU
		+	943745	Secondary	27	30	1.49179	5	1.10869	UUAAACUGCUUUUUUCAAUUAUUUUAUUAUUAAUUU
		+	943750	Secondary	32	21	1.913	2	1.05882	CUGCUUUUUUCAAUUAUUUUAUUAUUAAUUUAAAAC
		+	943867	Secondary	149	8	1.13115	9	1.07964	AAAAAAUCCCAUAAUUCAGUGCCAUAUUAUGAAUUA
		+	943904	Secondary	186	20	1.47618	19	1.21839	AACGAAAUGGGGAAAGUAUAGUGGUAGCUUCUGCGG
		+	943908	Secondary	190	9	1.27272	11	1.16666	AAAUGGGGAAAGUAUAGUGGUAGCUUCUGCGGUAGG
		+	943910	Secondary	192	6	1.23076	-2	0.968254	AUGGGGAAAGUAUAGUGGUAGCUUCUGCGGUAGGUC
MMP0956	4	+	946332	Primary	96	36	1.56249	16	1.14815	AUUUCUUUUUUACUAUUUUUUCAACUAUUUGUUUA
		+	946323	Secondary	87	16	1.11765	5	1.03333	UAUGUUAUAAAUUUCUUUUUUACUAUUUUUUCAACU
		+	946334	Secondary	98	7	1.125	2	1.01887	UUUCUUUUUUACUAUUUUUUCAACUAUUUGUUUACU
		+	946343	Secondary	107	11	1.3793	10	1.14706	UACUAUUUUUUCAACUAUUUGUUUACUUUCUGCACC
MMP0959	1	-	947236	Primary	39	12	2.09081	21	1.37499	GUUAAUCAUGAAACAUUUCUUAAAUUUUUUAGUAG
MMP0961	1	+	951131	Primary	21	39	2.85705	35	1.46666	GCAGUAUAAUUUAUAACUAUUUUCAUUUUUAACGG
MMP0963	3	+	952100	Primary	23	297	3.39514	140	1.86419	CGAAUAAUUAAAAAAUCUUUUUUAUUUUUUGAAAA
		+	952109	Secondary	32	9	1.125	42	1.51219	UAAAAAAUCUUUUUUAUUUUUUGAAAAAUACCAUAU
		+	952136	Secondary	59	11	1.43998	6	1.10526	AUACCAUAUUUAAAAAAUUAUUAAACCUAUUAACUC
MMP0964	1	+	952482	Primary	23	33	1.15865	14	1.0549	CUUAUAACUUUUCUGAAUUUUAAAAUUUUUAUAUU
MMP0965	5	-	952488	Primary	21	161	1.39851	56	1.19444	GUUCAUUAACUAAAUUAUUUUUCUUUUUUUAAUAU
		-	952332	Secondary	177	9	1.10345	18	1.05921	UUCAAUCUUUUUUUCUUUGAAAUUAUUUUUUUAUUC
		-	952345	Secondary	164	28	1.23333	45	1.12431	AUUUUCAAUGCUUUUCAAUCUUUUUUUCUUUGAAAU
		-	952467	Secondary	42	15	1.10345	7	1.0307	UUCUUUUUUUAAUAUAAAAAUUUUAAAAUUCAGAAA
		-	952474	Secondary	35	80	1.45198	21	1.08537	AUUAUUUUUCUUUUUUUAAUAUAAAAAUUUUAAAAU
MMP0966	1	-	952990	Primary	184	10	1.15873	8	1.06154	CAGGGUUUCAAAAUAUGUGUUAGAUCACUACGAAA
MMP0967	1	+	954739	Primary	158	10	1.5882	7	1.15217	AAAUGUUCAAAAAAAUGGAGAUAAUGCCUUAAAAG
MMP0969	1	+	956341	Primary	17	46	1.54117	12	1.14458	UGAUUUAAAAUAAUUUACUUUUUUAUUUUUAAGGU
MMP0971	4	+	959482	Primary	37	64	1.39024	19	1.1027	AAACAUUUUUAAUAACUAUAUUCUUUUUUUAAAAU
		+	959489	Secondary	44	14	1.15384	3	1.0229	UUUUAAUAACUAUAUUCUUUUUUUAAAAUUAAAAAA
		+	959499	Secondary	54	7	1.10937	0	1	UAUAUUCUUUUUUUAAAAUUAAAAAAUUAUUCAAAA
		+	959519	Secondary	74	11	1.18333	9	1.07895	AAAAAAUUAUUCAAAAUUAUAGUAUACUUUUGGACC
MMP0972	1	-	959483	Primary	12	30	1.3	22	1.14865	UACUAUAAUUUUGAAUAAUUUUUUAAUUUUAAAAA
MMP0975	2	-	961509	Primary	32	26	4.71375	7	1.87489	UUAUUAUUUUUUUAUUUUUAAUUUAUUUUUAAUUU
		-	961519	Secondary	22	26	1.41935	12	1.49998	AAUAACUAAUUUUAUUAUUUUUUUAUUUUUAAUUUA
MMP0978	4	-	964026	Primary	30	21	1.19626	0	1	UUUUUUAAUUUUUAAGAUUCAUUAUUUUUUCUGAA
		-	963987	Secondary	69	17	1.32075	2	1.03125	UCUUUAAUUGCAUUUUUCGCUUUUGAAUUUUCGUAA
		-	963994	Secondary	62	16	1.21052	7	1.10606	UGAAAUUUCUUUAAUUGCAUUUUUCGCUUUUGAAUU
		-	964043	Secondary	13	15	1.11194	3	1.05085	AUUGUAACCGAAUUAUAAUUUUUUAAUUUUUAAGAU
MMP0979	1	-	964320	Primary	20	30	1.76921	1	1.02083	GGAUGAAUAACAUCCUUUUUUAAUUUUAUUGUAUU
MMP0985	1	-	969998	Primary	43	7	1.33332	0	1	AUGGAGAUAGAACAACCCCGUGGCAACCAACUGUA
MMP0986	1	-	972494	Primary	49	10	1.5882	14	1.49998	AUUCAAAACUCCUUUUUUUAAUUAAAUUUUGGGCU
MMP0989	2	-	975233	Primary	35	41	1.67212	19	1.25333	UACUUUUUUUUAAAUUAUUUUUUUUAUUUUGGAAC
		-	975225	Secondary	43	6	1.16666	0	1	UUUUAAAUUAUUUUUUUUAUUUUGGAACCCUUUGAA
MMP0992	10	+	981162	Primary	75	3813	1.79971	4685	1.66257	UGAGCCAAUUUUAUGAUCUGCUGAUGCCUUUCUUU
		+	981164	Secondary	77	1777	1.62285	1977	1.42145	GAGCCAAUUUUAUGAUCUGCUGAUGCCUUUCUUUUU
		+	981207	Secondary	120	228	1.20141	39	1.06446	AAGUAUUUCGAUAAAAUUUUUCCAUUUUUUUAUUCG
		+	981210	Secondary	123	336	1.52665	111	1.25	UAUUUCGAUAAAAUUUUUCCAUUUUUUUAUUCGUCU
		+	981213	Secondary	126	64	1.12007	10	1.02538	UUCGAUAAAAUUUUUCCAUUUUUUUAUUCGUCUUCU
		+	981216	Secondary	129	65	1.15663	18	1.04712	GAUAAAAUUUUUCCAUUUUUUUAUUCGUCUUCUUCA
		+	981219	Secondary	132	34	1.1003	2	1.00617	AAAAUUUUUCCAUUUUUUUAUUCGUCUUCUUCAAAA
		+	981244	Secondary	157	46	1.2335	35	1.13158	CUUCUUCAAAAAUAAAUAAAUCAUCUAUUUUAACAU
		+	981250	Secondary	163	26	1.18055	11	1.04418	CAAAAAUAAAUAAAUCAUCUAUUUUAACAUUCAAAG
		+	981257	Secondary	170	12	1.12766	0	1	AAAUAAAUCAUCUAUUUUAACAUUCAAAGCCUUUGA
MMP0997	1	-	982773	Primary	110	13	1.76466	2	1.07407	AGGUGCGGAACUUUUUUACCGCAUUCCUUUAAAAA
MMP0998	1	+	984217	Primary	24	43	1.7818	38	1.42696	GAAUAAAAUAAAUAUUUCUUUUUUAAUUUUAAACG
MMP0999	3	-	984238	Primary	40	13	1.43332	5	1.125	GAAUAACCAUUAAAUAAAUUUUAAAUUUUUAAAAA
		-	984183	Secondary	95	10	1.20833	6	1.06818	UUAAAAAAGAAAUAUUUAUUUUAUUCUUCUUCAGGU
		-	984186	Secondary	92	6	1.10345	0	1	AAAUUAAAAAAGAAAUAUUUAUUUUAUUCUUCUUCA
MMP1001	1	+	986584	Primary	40	8	1.16666	0	1	CGCAAUUAAUUUUUAGUUAUUUUCUUUUUUCGUAU
MMP1002	2	-	986487	Primary	84	8	1.21621	4	1.15384	CUUUGUUUGCUCUUUAAAAUCUUACUUUCUGUUUC
		-	986436	Secondary	135	6	1.29998	-1	0.952383	AACAUCGAGGUAUUUUUUUAUCUCUUCAAGUGCAGA
MMP1009	2	-	992870	Primary	172	32	1.37647	62	1.26609	AUCACUGUGUAAUUUGUUAGUGGACGCUAUAGUCC
		-	993025	Secondary	17	7	1.15555	3	1.01613	UAUAUAUAUUAUAAUCUUUCUAAAACAUAUUAUACU
MMP1011	1	-	995294	Primary	33	32	1.94115	9	1.37498	UAUAACUUUUUUAGAUUUUUAUUUAUUUUUAAAAU
MMP1012	1	-	997109	Primary	40	15	1.65215	4	1.26665	AAAUAUCUGUUCCUUACUUUUUUAUUUUUUAAAGA
MMP1013	2	+	1001411	Primary	53	46	2.04543	12	1.21428	AAAUUUUUUAUUAACUUAUUUUCUUAUUUUGAGGA
		+	1001424	Secondary	66	6	1.85702	9	1.33332	AACUUAUUUUCUUAUUUUGAGGAGAUAUUAUGUCUA
MMP1014	1	+	1002514	Primary	24	61	2.27081	71	1.6698	AUUUAAUUUAUUUUUUUUAAAUAUUCUUUUGUGUU
MMP1015	6	+	1003004	Primary	97	60	1.31915	53	1.23767	UAAUUCCAUGAAUAUCAAUAUACUCUUCUUAACCC
		+	1003001	Secondary	94	30	1.11029	22	1.07309	UAUUUAAUUCCAUGAAUAUCAAUAUACUCUUCUUAA
		+	1003012	Secondary	105	21	1.15909	12	1.07362	AUGAAUAUCAAUAUACUCUUCUUAACCCGCCAAAAC
		+	1003035	Secondary	128	11	1.10784	-5	0.973684	AACCCGCCAAAACGGAGAAUUAUCACUGCUUUUUCA
		+	1003038	Secondary	131	36	1.61016	7	1.04046	CCGCCAAAACGGAGAAUUAUCACUGCUUUUUCAAAA
		+	1003045	Secondary	138	8	1.21052	1	1.00588	AACGGAGAAUUAUCACUGCUUUUUCAAAAUCAUAUC
MMP1016	2	+	1004378	Primary	24	114	1.47303	80	1.29629	GAGUAAAUUCUCUUUUUUAUUUAUUUUUUUAAAAA
		+	1004397	Secondary	43	26	1.18182	14	1.07821	AUUUAUUUUUUUAAAAAAAUUAAAAAUUUUUAAAAG
MMP1017	1	-	1004298	Primary	98	53	1.26903	49	1.19919	GGAAAAUUCUUCAGCCAUUAUUUCUUUUUUACCAA
MMP1018	3	+	1007471	Primary	41	19	1.2676	18	1.1374	AAACCAUACCCUUACUUUUUUUAAACUUUUAAAAC
		+	1007480	Secondary	50	11	1.28947	0	1	CCCUUACUUUUUUUAAACUUUUAAAACAUAUAUCUA
		+	1007526	Secondary	96	8	1.47056	26	1.33333	ACAUGUUUAAAAAAUCUUUAUUUAUCCUUUUAAUAU
MMP1019	1	+	1008318	Primary	23	9	1.69225	4	1.09091	AUAUUAAAAAUAUUAAUUAUUCUUUUUUUCGAUUA
MMP1021	3	-	1009388	Primary	39	38	1.92681	19	1.17757	AAUUUUUUAAUUUUCUAUUUUUUAAUUUUAAAUGU
		-	1009380	Secondary	47	23	3.87464	35	1.66037	UAAUUUUCUAUUUUUUAAUUUUAAAUGUUUUACCAA
		-	1009395	Secondary	32	19	1.15702	8	1.0452	CUUUUUUAAAUUUUUUAAUUUUCUAUUUUUUAAUUU
MMP1024	1	-	1012906	Primary	49	8	1.99988	28	1.4179	UCUUUUUUAAUUUUUGUUUUACCAUUUUUUCAGAU
MMP1026	3	-	1015705	Primary	42	15	1.29999	3	1.04615	AUCUUUUUUUAUCUUUAAUUUUUAAAUUCUACUUA
		-	1015632	Secondary	115	14	2.55538	8	1.13115	UUAAAUAAAAUAGAUAUUAAAUUCUCAUUUUACAAU
		-	1015712	Secondary	35	10	1.13889	1	1.01471	AAGCUUUUAUCUUUUUUUAUCUUUAAUUUUUAAAUU
MMP1029	2	+	1022022	Primary	33	14	1.15384	9	1.0297	CUUUUAAAACAUUAAAAUUCUAUCUUUUUUCAGAU
		+	1022035	Secondary	46	7	1.10937	8	1.03265	UAAAAUUCUAUCUUUUUUCAGAUAUGUUUUUAGAUC
MMP1030	5	-	1022041	Primary	64	68	1.93149	106	1.31361	UUUCUAUUUUUAGAACUUUUUUUAAUUUAUGAUCU
		-	1021976	Secondary	129	8	1.12698	31	1.08807	UAAUGUUUUAAAAGAAUUUAGAGAUAAUAAUCGACG
		-	1021998	Secondary	107	13	1.21311	-2	0.993846	UAUCUGAAAAAAGAUAGAAUUUUAAUGUUUUAAAAG
		-	1022049	Secondary	56	32	1.16931	24	1.04743	UAUUUUUAAUUUCUAUUUUUAGAACUUUUUUUAAUU
		-	1022060	Secondary	45	62	1.19872	45	1.07154	UUAUCAUAUUCUAUUUUUAAUUUCUAUUUUUAGAAC
MMP1031	4	-	1022731	Primary	32	115	1.86465	63	1.252	UAUAUAUAUUUUAACUUUUUUAAUUGUUUUAAUAU
		-	1022716	Secondary	47	8	1.19047	0	1	CUUUUUUAAUUGUUUUAAUAUUUAUUAUGAUAAAGG
		-	1022721	Secondary	42	16	1.29629	18	1.10227	UUUAACUUUUUUAAUUGUUUUAAUAUUUAUUAUGAU
		-	1022724	Secondary	39	26	1.30232	4	1.01942	UAUUUUAACUUUUUUAAUUGUUUUAAUAUUUAUUAU
MMP1032	2	-	1023445	Primary	16	37	1.61666	35	1.3271	UAAAACAGCACUAACUUUUUUUAUUUUUUUCGAAU
		-	1023362	Secondary	99	11	1.68746	5	1.09434	UAACUCAAGUGUUUUUAUUUUUAUUCAUUUUAACAG
MMP1033	1	+	1028494	Primary	12	19	1.61288	22	1.48888	UUAAGACAAAAACACUAAUUAUCUCUUUUUGGUAA
MMP1036	3	+	1030479	Primary	47	137	2.44209	108	1.76595	AUUUCAAAUUCUUAUUCUUUUUUUAAUUUUGGCAA
		+	1030473	Secondary	41	26	1.104	64	1.20253	UUUAAAUAUUUCAAAUUCUUAUUCUUUUUUUAAUUU
		+	1030493	Secondary	61	11	1.91659	1	1.05882	AUUCUUUUUUUAAUUUUGGCAAUUUAAAAGCUUUAA
MMP1037	1	+	1031018	Primary	25	6	1.59994	24	1.38095	AAUAAAAUUUAUUUUCCUUAUCAAUAUUUUAUGAA
MMP1038	2	+	1031830	Primary	111	34	1.18889	80	1.26756	AAAGUGGAUCCUGUCAUUAGACAACUCCAUGAAAG
		+	1031917	Secondary	198	24	1.17518	42	1.25767	GAACGCGCUUAUGACGCCAGCUCCAUCAGCCGAGUA
MMP1039	1	+	1033970	Primary	157	11	1.13924	2	1.01504	GGUAUCGGUGCAGGUAUCACUGGUGCUAGCGGUGC
MMP1040	2	+	1034580	Primary	46	10	1.10638	5	1.03817	CCAGGGUUUCUAAAUACUUUAAAUCCAAUUCCGAA
		+	1034582	Secondary	48	8	1.10256	12	1.10256	CAGGGUUUCUAAAUACUUUAAAUCCAAUUCCGAAGG
MMP1041	2	+	1035299	Primary	93	63	1.525	46	1.27059	AUUCAUGACUUUAUUUGUACUUGCAGGAAUCGCUA
		+	1035335	Secondary	129	31	1.36904	5	1.03788	UAUUCUUGGUUAUUAUGAUCUUCCUGAUAAGAUACU
MMP1043	2	+	1036784	Primary	71	26	1.48147	50	1.47619	AUCCGGUCCGGUUGUUGUUGCCGAAGGCAUGAAAG
		+	1036791	Secondary	78	7	1.17073	1	1.01111	UCCGGUUGUUGUUGCCGAAGGCAUGAAAGGUUCCCA
MMP1044	1	+	1038503	Primary	14	42	1.69999	29	1.17262	UGCUUUAAUCAAAUAACCUAAUUUAAUUUUAAACU
MMP1045	3	+	1040076	Primary	164	10	1.13333	11	1.0873	AGAAAAGAGACGCCCUUAUGAUGGAGUUUUUUGAA
		+	1039938	Secondary	26	6	1.10714	7	1.06087	AAUAAUUCAGAAGCUGAAUUAUUCCCAUUUUAUUAA
		+	1040099	Secondary	187	10	1.17857	3	1.02586	GGAGUUUUUUGAAAUCCUUGAUCAAGCUUCUGGAAU
MMP1046	1	+	1040729	Primary	126	10	1.16393	6	1.0438	GAAAUAGUUGGUCAAAAAGUUCCAGUUUUUGCAGC
MMP1047	4	+	1041025	Primary	35	1906	1.99478	1259	2.18886	UACCAUCAAUACUAACUUUUUUUUACUUUUCAAUA
		+	1041019	Secondary	29	607	1.13903	360	1.12291	AAUUAAAUACCAUCAAUACUAACUUUUUUUUACUUU
		+	1041035	Secondary	45	199	2.24374	6	1.03947	UACUAACUUUUUUUUACUUUUCAAUAAAAUUUACGU
		+	1041040	Secondary	50	11	1.34374	1	1.01	ACUUUUUUUUACUUUUCAAUAAAAUUUACGUGAAAC
MMP1048	1	+	1041635	Primary	199	8	1.18181	15	1.08621	UUCCUAUCAGCGUAAUUUAGGUGGUUUAAUGAACG
MMP1049	1	+	1041947	Primary	44	99	1.36131	80	1.16461	UUAACAAAAAAGAAUUUAAUUUUAUUUUUUAAGCC
MMP1050	1	-	1041877	Primary	62	37	1.18687	28	1.08116	AAUUUAUACUUCCGCAGGAUUUCCUUUUUUCAUGA
MMP1053	5	-	1044615	Primary	18	373	2.22697	761	1.86477	UUAGGAUACUAAUUCCUUUUUUCUUUUUUUAAUAA
		-	1044585	Secondary	48	6	1.13953	10	1.06329	UAAUAAAAAUUUAAAAUUUAAAAAUAAUAUUUAUUC
		-	1044604	Secondary	29	27	1.48213	13	1.06468	AAUUCCUUUUUUCUUUUUUUAAUAAAAAUUUAAAAU
		-	1044606	Secondary	27	32	1.35555	18	1.08333	CUAAUUCCUUUUUUCUUUUUUUAAUAAAAAUUUAAA
		-	1044612	Secondary	21	17	1.1223	25	1.04708	AGGAUACUAAUUCCUUUUUUCUUUUUUUAAUAAAAA
MMP1056	2	+	1047880	Primary	114	16	1.25	3	1.05357	UUUGAAAAAAUUGGAACUUCCCCUUUUUUUGGUAU
		+	1047887	Secondary	121	6	1.11538	4	1.07843	AAAAUUGGAACUUCCCCUUUUUUUGGUAUUUUGAGU
MMP1057	1	-	1047671	Primary	92	6	1.11321	0	1	AUCUCUAUCCACACUGUACAUUUCCAUUUUAGGAA
MMP1060	1	+	1053038	Primary	52	8	1.88879	2	1.09091	AAAAUUCCUACAAAACACUUAAAUCUUUUUCAAAA
MMP1062	1	+	1055517	Primary	35	8	1.27585	6	1.19999	UCUUUACCCUAUUAUCUUUAAAUUCUUUUUAAAAU
MMP1063	1	+	1057284	Primary	174	105	1.42	210	1.82031	CCCUCUCCAUAAUUCUAAAUAAGAUCUCUUUUCCA
MMP1064	3	-	1057130	Primary	110	145	1.96666	87	1.21324	UAAAUUUAACUUAAUUUUUUUAAAUAAUUUAAAAA
		-	1057122	Secondary	118	20	1.19608	5	1.01453	AACUUAAUUUUUUUAAAUAAUUUAAAAAAGUAAAAA
		-	1057139	Secondary	101	76	1.17312	57	1.09135	UUUAAUUCUUUAAAUUUAACUUAAUUUUUUUAAAUA
MMP1066	2	+	1058878	Primary	73	15	1.31914	1	1.0084	AUUAUAUUCAUUACUGGAAUAUCUUUUUUUAAACC
		+	1058825	Secondary	20	7	1.10937	2	1.0146	AAAAAGAAUAAAUUAUUUGAUUUUUUGUUUUAAAUC
MMP1067	1	-	1058785	Primary	39	16	1.43242	13	1.09924	UCAAAUAAUUUAUUCUUUUUUAAUUUUUUCAGUAA
MMP1068	1	-	1060419	Primary	21	6	1.33332	5	1.14285	AUCUUUUAAAUUUUCUUUUUUAACUUUUUUAAUUG
MMP1069	1	-	1061407	Primary	33	29	2.61102	35	1.34313	AUUUAAUAAAACACGCUUUUUCUUUUUUAUGGUGA
MMP1070	1	-	1062378	Primary	20	28	2.39993	42	1.95452	GAUAUUGUAAUUUAAUUUAUUAUUUUUUUUGGAGG
MMP1071	2	-	1063061	Primary	50	34	3.4284	5	1.15151	AUUAUUUUUUAGUUAAACUUAUAUUUUUUUAAAUC
		-	1063081	Secondary	30	15	1.2459	6	1.10909	AUCUUUAAAUUUUUUAAAUUAAUUAUUUUUUAGUUA
MMP1074	1	+	1065456	Primary	78	28	1.24561	2	1.01587	AAAAAAGAAACUUCUAUUUUUAUUAUUUUUUAUGG
MMP1075	3	-	1065382	Primary	67	30	1.27027	22	1.26829	AAUUUUAAAAAUUUAAAGUUUUAUAUUUUUAAGUU
		-	1065292	Secondary	157	9	1.13235	4	1.06061	CUGCGCCACCCAAAAUUGCUUCUGUUAAUGCAACGU
		-	1065417	Secondary	32	22	1.15385	19	1.17273	AAAAAUAGAAGUUUCUUUUUUCAAACUUUUUAAAAA
MMP1076	1	-	1065853	Primary	68	6	1.39997	10	1.24999	CCGAUCUAAAAGAAGGCCAGCUCCAGCAGUGUGGU
MMP1077	1	-	1067044	Primary	121	9	1.44998	8	1.17391	UGCGGGAAAACCGAUAAUAGAACAUAUUAUCGAAA
MMP1080	3	+	1071802	Primary	174	14	1.34999	2	1.03704	UAAAGACUUUGAAACUACCUUUUUGUUUUUAUUUC
		+	1071635	Secondary	7	8	1.25806	0	1	GUUUUGUUAAAUAUAGAUAUUUAAUUCUUUUAAGGA
		+	1071805	Secondary	177	6	1.19354	1	1.01887	AAGACUUUGAAACUACCUUUUUGUUUUUAUUUCGGG
MMP1082	1	+	1074209	Primary	146	13	1.76466	21	1.49999	UAAAGAUCCAAAUUAUAUAGGUGAUCCUUUAAAUG
MMP1083	3	+	1075036	Primary	190	9	1.2647	7	1.125	UCCAUAAAUCCAUUUUUUAAAUCAUUUUUUAAAAA
		+	1074897	Secondary	51	7	1.11111	1	1.01961	UUAUACAUAAUUUAUGAUAUCUCUUGUUUUUUAAUC
		+	1074986	Secondary	140	6	1.13043	2	1.02857	UAUUAUUUAUAUUUUAUAUCAUAAUAUUUUUCAAUG
MMP1084	1	-	1074943	Primary	15	12	1.26666	4	1.06154	AUAAAAUAUAAAUAAUACAAUUUUAUUUUCAAAAG
MMP1085	1	-	1076611	Primary	145	6	1.49996	3	1.0566	GAAAAAUACAUUAUAUAUUUUUAUGAUUUUGACUG
MMP1088	1	+	1080850	Primary	27	6	1.11764	1	1.02	UAAUCUAUUAGCCCCUAAACCAUUUGAAUUGAAUA
MMP1090	1	-	1082515	Primary	18	17	1.60712	17	1.40475	AAAAAGAUUUAAUAUUAUUUUUAUUUUUUUCAGGG
MMP1091	1	-	1083421	Primary	115	34	2.69991	3	1.06977	AUUAAAAAAUAUACUUACUACUUUAUUUUUGGUGA
MMP1092	1	-	1084450	Primary	7	7	1.26922	4	1.11428	CGAUACUUUACACGUUAAUGUAAAAGCCAUAUUUA
MMP1094	6	-	1085866	Primary	19	131	1.64215	168	1.65369	AACAAAAAUAAUUCUUUCUUUUUUAUUUUUUUAAU
		-	1085838	Secondary	47	22	1.99995	8	1.42103	UUUUUAAUUAUAUAUCCUUUAAUUUUAAUUUACAAA
		-	1085842	Secondary	43	10	1.20833	0	1	UAUUUUUUUAAUUAUAUAUCCUUUAAUUUUAAUUUA
		-	1085849	Secondary	36	13	1.16667	17	1.37777	UCUUUUUUAUUUUUUUAAUUAUAUAUCCUUUAAUUU
		-	1085852	Secondary	33	17	1.15596	5	1.06667	CUUUCUUUUUUAUUUUUUUAAUUAUAUAUCCUUUAA
		-	1085863	Secondary	22	20	1.13158	30	1.17964	CAAAAAUAAUUCUUUCUUUUUUAUUUUUUUAAUUAU
MMP1095	1	+	1089279	Primary	35	34	2.35995	11	3.19956	UUUAAUUAUUUAAUUUCCAAUUAUUUUUUUAAAAA
MMP1100	4	-	1092579	Primary	54	583	2.15217	104	1.31515	UUCAAUAAUUUAUCAAAUUCUUCUUCUUUUAAACG
		-	1092445	Secondary	188	26	1.55318	31	1.19018	CACUGAUUAUUUUUGGAUUUUCAAUCAUUUUAAGUG
		-	1092570	Secondary	63	28	1.20438	15	1.06	UUUAUCAAAUUCUUCUUCUUUUAAACGUUCUCCAGU
		-	1092572	Secondary	61	70	1.40462	3	1.01145	AAUUUAUCAAAUUCUUCUUCUUUUAAACGUUCUCCA
MMP1101	4	-	1093237	Primary	20	26	1.5306	2	1.08695	CGAAAUUUAACUUUUUCUUUUUUUAAUUCUGUUGA
		-	1093180	Secondary	77	9	2.28553	0	1	UUAAGGCAGAUUUGAUCAAAAAUGUUUUUUUAAUGU
		-	1093235	Secondary	22	6	1.15	0	1	GAAAUUUAACUUUUUCUUUUUUUAAUUCUGUUGAAA
		-	1093243	Secondary	14	17	1.18478	2	1.07692	UAUUUUCCGAAAUUUAACUUUUUCUUUUUUUAAUUC
MMP1103	1	+	1096003	Primary	186	17	1.7391	32	1.82049	ACUCCCAAUAACACUUGCACUAAACGUGCCGUCAA
MMP1104	1	+	1096334	Primary	21	24	1.92304	7	1.15909	UCAAAAUAAACCCUAGUUUUUUUAUAUUUUCAGUA
MMP1106	4	+	1097811	Primary	28	37	1.24666	6	1.03488	AAUUAUUUCAUGUUAAUACAUAUCUCUUUUAAAAA
		+	1097818	Secondary	35	11	1.11	-1	0.993333	UUCAUGUUAAUACAUAUCUCUUUUAAAAAUUGUAAU
		+	1097853	Secondary	70	8	1.10256	4	1.02703	UUUUGAAGUACUUUCAUCCACUUUUACUUUUAUAUA
		+	1097855	Secondary	72	7	1.10294	6	1.04286	UUGAAGUACUUUCAUCCACUUUUACUUUUAUAUAUC
MMP1107	1	-	1097713	Primary	71	18	1.13846	8	1.05674	GUAAAAAUUUAACCCUAUUUUCCAGUUUUUCAUAA
MMP1109	1	-	1098943	Primary	86	8	1.42103	50	1.49999	AAUUUGGAUGAUGUAAAUAGUGAACACGAUCUUAU
MMP1110	3	-	1100156	Primary	11	27	2.68739	84	2.04999	UAAUAAAAAAAUAUUUUAAUCGUUUAUUUUAGUGU
		-	1100001	Secondary	166	25	2.08691	87	1.61267	UAGGACUCCUAUUUUAAGUAGGGAGGAUAAUAUCAA
		-	1100003	Secondary	164	7	1.14285	15	1.0625	AUUAGGACUCCUAUUUUAAGUAGGGAGGAUAAUAUC
MMP1113	2	-	1103178	Primary	45	38	1.75998	13	1.24999	UAAAUAACAUUUAUUUUAAUUUUAUUUUUUAAAGG
		-	1103169	Secondary	54	8	1.47056	0	1	AUUUAUUUUAAUUUUAUUUUUUAAAGGGGUUAAAUU
MMP1116	2	+	1107138	Primary	29	140	3.64146	93	1.80869	AUUUUAAUUAACCCUAUUUUUUAAUUUUUAGGAUA
		+	1107142	Secondary	33	9	1.31033	0	1	UUAAUUAACCCUAUUUUUUAAUUUUUAGGAUAUUAA
MMP1117	2	+	1107821	Primary	145	24	1.12435	15	1.12397	AGGACAGUACCACAACUUCUUACCUGUUUUUUCGC
		+	1107823	Secondary	147	17	1.10241	6	1.05455	GGACAGUACCACAACUUCUUACCUGUUUUUUCGCAU
MMP1118	1	-	1107639	Primary	42	47	1.46534	16	1.22857	UAGAUUUUUUCAAUCUUUUUUUAGCUUUUUCAAAA
MMP1119	1	+	1109188	Primary	127	8	1.42103	32	1.68084	ACUCAAACUGACUUAUUUAGUGGUGCCCAUGAGAA
MMP1120	1	+	1111108	Primary	77	35	1.43209	16	1.06584	UUAAAUGAAAUAUUUUCUUUUACUUCUUUUAAAAC
MMP1121	1	-	1110934	Primary	141	7	1.11111	1	1.0068	AUCCGCCGUGUGAUUCAACGAUUUUUUUACAAACU
MMP1122	2	-	1111650	Primary	37	37	2.94727	63	1.61764	UUUUUUACAUUUUACUUUUUUACAUAUUUUGGAGG
		-	1111639	Secondary	48	6	2.19976	4	1.05882	UUUACUUUUUUACAUAUUUUGGAGGAUUAUUAUGAU
MMP1124	1	+	1115700	Primary	186	11	1.54997	2	1.12499	UAUCAAAGCUAUUUAUUGUUAAAACUUUUAUUAAA
MMP1126	1	+	1116920	Primary	39	24	2.41168	8	1.19512	AAUCAUUUUUAUCUAAUUAAUUACUUUUUUAGAGG
MMP1127	2	+	1119114	Primary	40	15	1.31914	21	1.13816	AUAAUAAAAUUAAAUAUUAAUCUAUUUUUUAAUUG
		+	1119118	Secondary	44	6	1.19999	5	1.03676	AUAAAAUUAAAUAUUAAUCUAUUUUUUAAUUGGAUC
MMP1128	1	-	1119068	Primary	38	17	1.56665	52	1.4031	UUAAUUUUAUUAUUCAUUUUAAAUUAUUUUGCACG
MMP1129	2	-	1119738	Primary	21	32	1.27586	29	1.14428	GUCGAAUAAAUUAUUUUUUUUAUUUAUUUUAGUUA
		-	1119727	Secondary	32	23	2.91651	15	1.20548	UUAUUUUUUUUAUUUAUUUUAGUUAUUUUCUGGUGA
MMP1131	3	-	1120781	Primary	54	40	1.58823	13	1.09848	AUUAAAAACUAUUUUUUAAAUAACGUUUUUUAGAU
		-	1120759	Secondary	76	6	1.37498	23	1.2987	AACGUUUUUUAGAUUCGGGAGGGACUUUUAUGUUUU
		-	1120794	Secondary	41	24	1.14458	11	1.05946	AUAUUUUAAAAAUUAUUAAAAACUAUUUUUUAAAUA
MMP1132	1	+	1122885	Primary	71	6	1.49996	4	1.06896	GGAGAAAAAAAACUACUUUCUGAUAUUUUAAUGGC
MMP1133	2	+	1123942	Primary	67	8	1.34781	7	1.15555	AAAUAUAAAAUUAUAUAAAUAGAUUCUUUUUAUAA
		+	1123895	Secondary	20	6	1.12245	9	1.11688	ACUUAAAAUAAUUCUUAAUUUUACCUCUUUUGAUGA
MMP1134	4	+	1125263	Primary	42	25	2.31572	35	1.47944	AUAAAAUAACUUUUUUUAAACAUUAUUUUUAAAAU
		+	1125250	Secondary	29	12	1.16666	30	1.14151	AAUUUAUUUUUUUAAUAAAAUAACUUUUUUUAAACA
		+	1125259	Secondary	38	7	1.12281	10	1.07353	UUUUAAUAAAAUAACUUUUUUUAAACAUUAUUUUUA
		+	1125270	Secondary	49	6	1.74991	3	1.09091	UAACUUUUUUUAAACAUUAUUUUUAAAAUUUAAAGA
MMP1136	2	+	1127283	Primary	53	48	1.82757	7	1.12963	UAAUUACCUUAUUCUAUUUUUAAAUUUUUAAAAAA
		+	1127301	Secondary	71	13	1.35134	3	1.0566	UUUUAAAUUUUUAAAAAAAUAAUAAAAUUUUAGAAA
MMP1137	2	-	1127283	Primary	149	16	1.27118	3	1.04545	AUAAUUUUUCUAAAAUUUUAUUAUUUUUUUAAAAA
		-	1127286	Secondary	146	11	1.15493	14	1.20588	UAAAAUAAUUUUUCUAAAAUUUUAUUAUUUUUUUAA
MMP1139	2	+	1129503	Primary	26	59	3.45823	37	1.88093	AUAAUUAUUUUUCAUUUUUUUAAAUUAUUUAAAAA
		+	1129660	Secondary	183	12	1.13333	2	1.01562	AGAAAAUUUCAAACGUGAGAGUUAUGACUGUAGAAA
MMP1140	2	+	1129976	Primary	78	10	1.12195	5	1.05208	CAAAACACUUUCGUCAAUAGUUAUUUUCAGAUCAA
		+	1130046	Secondary	148	6	1.14634	-1	0.983051	AAAUUUACAGAUUUACACCACAUUUUUACGGUGAUA
MMP1142	1	+	1133540	Primary	98	10	1.22222	8	1.09412	GACUUCUUUUCCUUCGAUAUGUCUUAAAGCAUCUG
MMP1143	2	-	1133349	Primary	129	24	1.92304	16	1.21917	GGAAAAAUAUCUUCUUUUUUAACUUUUUUUAAGUA
		-	1133352	Secondary	126	7	1.10769	0	1	AAUUGGAAAAAUAUCUUCUUUUUUAACUUUUUUUAA
MMP1146	4	-	1135588	Primary	29	53	1.2598	125	1.11171	AAAUUUUAAUUUCUAUUUUUUAAAUAUUUUAAAAA
		-	1135483	Secondary	134	6	1.11321	67	1.23183	CAUUGUAAAUUUCUUCAAUUUUUCCAAUAUCAACGU
		-	1135526	Secondary	91	30	1.32258	134	1.1882	AAUUUUGAAAAAAUGCUUCUUUUUAAUUUUUCAAAG
		-	1135580	Secondary	37	22	1.13836	18	1.01826	AAUUUCUAUUUUUUAAAUAUUUUAAAAAUUUAAAAA
MMP1147	7	-	1137115	Primary	56	571	1.57794	447	1.2935	AAAAUAAUUAUCUAAACCAUCUUUUUUAUUACUCG
		-	1137061	Secondary	110	6	1.19354	6	1.01392	AACACUUAUAUACCAGUUCAAUUUAGUUAUUCUAUC
		-	1137094	Secondary	77	38	1.52054	40	1.08753	CUUUUUUAUUACUCGUUUAAACUCAAUUUUUGUAAC
		-	1137101	Secondary	70	29	1.20422	-1	0.998066	AAACCAUCUUUUUUAUUACUCGUUUAAACUCAAUUU
		-	1137108	Secondary	63	109	1.39493	35	1.04207	AUUAUCUAAACCAUCUUUUUUAUUACUCGUUUAAAC
		-	1137112	Secondary	59	275	1.45008	251	1.25691	AAUAAUUAUCUAAACCAUCUUUUUUAUUACUCGUUU
		-	1137118	Secondary	53	320	1.17689	429	1.18791	ACUUAAAAUAAUUAUCUAAACCAUCUUUUUUAUUAC
MMP1148	1	-	1137307	Primary	135	10	1.10309	20	1.04292	ACACAAUAAAGGUUCAAACCAUAUUGUAUGCAGAA
MMP1149	3	+	1139105	Primary	39	343	2.29433	195	1.75581	AACCUUAUUUUUUUACUUUUUUUAAAUUUUAAAGU
		+	1139111	Secondary	45	33	1.54097	-2	0.986014	UAUUUUUUUACUUUUUUUAAAUUUUAAAGUUAAGAA
		+	1139118	Secondary	52	13	1.35134	0	1	UUACUUUUUUUAAAUUUUAAAGUUAAGAAGAAAAAA
MMP1152	1	-	1140998	Primary	24	44	2.41931	55	1.679	AAAUAAAAAUUCUUUUUUAUUAUUUAUUUUGAACU
MMP1153	3	-	1141405	Primary	39	48	1.63999	12	1.23999	AUAAUAUGUAUAUACUAAUCAAUCUUUUUUAUGCA
		-	1141388	Secondary	56	7	1.87489	1	1.03226	AAUCAAUCUUUUUUAUGCAGUUUUUGGUGGUUUUAU
		-	1141394	Secondary	50	26	2.29994	2	1.0606	UAUACUAAUCAAUCUUUUUUAUGCAGUUUUUGGUGG
MMP1154	1	+	1143537	Primary	160	8	1.44442	1	1.02632	CAUUUGAACAGGCUUCCUGCUGUCCUGCACCGGGA
MMP1155	2	+	1144322	Primary	27	15	1.3409	2	1.02469	UAAAAUAUUUAAUCCUUAGACGGAGGGGAUUUUAU
		+	1144327	Secondary	32	7	1.21212	22	1.39285	AUAUUUAAUCCUUAGACGGAGGGGAUUUUAUGAAAG
MMP1156	1	+	1144642	Primary	2	74	9.22131	66	4.14271	AGCUAUGAAAGUAGUUAGCAAAUUAUAAAUGGGGA
MMP1158	1	+	1145337	Primary	40	436	10.6887	380	5.63409	GGGGGUUUAAAUAUGGAUGGUAAAUUAAGAUGCGA
MMP1160	4	+	1146065	Primary	23	378	3.93021	69	1.77527	ACUAUAAUUCAUUCAUUAUUUAAUUUUUUUAGGGG
		+	1146069	Secondary	27	20	1.32258	1	1.01235	AUAAUUCAUUCAUUAUUUAAUUUUUUUAGGGGGAUA
		+	1146073	Secondary	31	6	1.13333	1	1.01282	UUCAUUCAUUAUUUAAUUUUUUUAGGGGGAUAAUAA
		+	1146076	Secondary	34	7	1.19444	10	1.20833	AUUCAUUAUUUAAUUUUUUUAGGGGGAUAAUAAUGA
MMP1161	2	+	1146455	Primary	27	389	3.99228	92	1.76666	UAAAUCUAUUACUUUUAUUUAACUUUUUUUAGGUG
		+	1146459	Secondary	31	57	3.03564	-1	0.988372	AUCUAUUACUUUUAUUUAACUUUUUUUAGGUGUAUU
MMP1163	2	+	1147989	Primary	20	80	1.78431	74	1.42285	UAUUAAAUAAUCAAUCUUUUUUAACAUUUUAUUCC
		+	1147996	Secondary	27	13	1.56519	0	1	AUAAUCAAUCUUUUUUAACAUUUUAUUCCCAAAAUA
MMP1164	1	+	1148476	Primary	161	17	3.12473	82	2.51849	AAGCGCAGUUAUUAAUUUUGAUGAAAAAUUCGUUA
MMP1167	1	+	1151820	Primary	3	50	2.35132	86	2.62261	CUUUUGAAACAUAUUAAAGGUGAUUAAAUGCUACA
MMP1168	1	+	1152655	Primary	91	8	1.23529	13	1.1884	CAUGUAUCCUACACCAAAAGAAAACCUUUUGAAAG
MMP1169	1	+	1153796	Primary	6	15	1.22388	9	1.08411	UUUUUUACUUUUUUAAAUAUUUAAAGAAUUAAUAA
MMP1172	1	-	1155213	Primary	44	6	1.42854	5	1.13888	AUUUUUAAAUGAUUUUUACAUUUUCAUUUUAAAUA
MMP1174	3	+	1157632	Primary	19	302	3.20436	298	1.8869	UAAAAGAAUAAUUCUUUUUUUUAUUUUUUUAACUG
		+	1157636	Secondary	23	12	1.1791	15	1.09091	AAGAAUAAUUCUUUUUUUUAUUUUUUUAACUGAGGA
		+	1157642	Secondary	29	27	2.79988	-4	0.976744	AAUUCUUUUUUUUAUUUUUUUAACUGAGGAUAUAUU
MMP1175	3	+	1158880	Primary	43	13	1.3611	1	1.02128	CUUUUUUAGAAUCUUAUUUUUUUAAUAUUUUAAAU
		+	1158873	Secondary	36	7	1.12727	7	1.13725	UUAUAAUACUUUUUUAGAAUCUUAUUUUUUUAAUAU
		+	1158891	Secondary	54	6	1.5454	3	1.15789	AUCUUAUUUUUUUAAUAUUUUAAAUAUUUUUUAAUA
MMP1177	5	+	1160136	Primary	22	118	1.51982	42	1.15217	ACCAAUAACUUUCUUUUUUCUUUUUUUAUUCAUUA
		+	1160133	Secondary	19	78	1.21024	18	1.05294	UCAAACCAAUAACUUUCUUUUUUCUUUUUUUAUUCA
		+	1160140	Secondary	26	24	1.13115	14	1.05785	AAUAACUUUCUUUUUUCUUUUUUUAUUCAUUAAUUA
		+	1160161	Secondary	47	66	2.7368	78	2.13042	UUUAUUCAUUAAUUAAAUUUUAUUAUUUUUUAGUAA
		+	1160209	Secondary	95	6	2.49962	7	1.49996	AAAUAUAUGUAAUAAUAAUACUACAUUUUUUAAAAG
MMP1178	5	+	1161386	Primary	30	226	2.72518	184	1.86792	UUUCUUUUUUUUCUUUUUUAAAAUUUUUUUAAAGA
		+	1161391	Secondary	35	21	1.36841	4	1.02837	UUUUUUUUCUUUUUUAAAAUUUUUUUAAAGAGUAUU
		+	1161393	Secondary	37	11	1.23913	7	1.06087	UUUUUUCUUUUUUAAAAUUUUUUUAAAGAGUAUUUA
		+	1161395	Secondary	39	8	1.23529	25	1.2809	UUUUCUUUUUUAAAAUUUUUUUAAAGAGUAUUUAAA
		+	1161446	Secondary	90	7	1.99986	11	1.22	CCAAUUCUUCGUAAAACUAUUUUUAAAUUUUAACCU
MMP1180	1	+	1164157	Primary	31	12	2.49981	31	1.42465	CAUACCCUUGAAUCACUCUUUUUUAAUUUUGAUUU
MMP1181	2	+	1165473	Primary	19	17	1.60712	2	1.10526	ACCUUAACUAAUAUCAUAUAUUAUUUUUUUAAAAA
		+	1165489	Secondary	35	12	2.09081	4	1.33331	AUAUAUUAUUUUUUUAAAAAAUUUAUUUUUUCAUAA
MMP1183	4	+	1167480	Primary	92	310	1.97792	55	1.1511	UUCUACAUAUUUCUUUAAAACCAUUUUUUUCAUAA
		+	1167489	Secondary	101	28	1.16766	-4	0.987461	AUUUCUUUAAAACCAUUUUUUUCAUAAAGUUUAAUU
		+	1167532	Secondary	144	21	1.17213	8	1.02374	UCCAAUUUACUGAAACCGUUAAUAUCAUACUCGAAA
		+	1167574	Secondary	186	25	1.29411	32	1.09091	AGUUUUUUGAAAUCUUUUCAAUUAAUUCUUUAAAAA
MMP1186	3	+	1170686	Primary	21	160	2.07382	58	1.24167	AAUUUAUAACCUUAAUAAUUCUCUUUUUUUGGUGA
		+	1170692	Secondary	27	17	1.22666	0	1	AUAACCUUAAUAAUUCUCUUUUUUUGGUGAUUUUAU
		+	1170695	Secondary	30	18	1.37499	9	1.04762	ACCUUAAUAAUUCUCUUUUUUUGGUGAUUUUAUGGA
MMP1188	4	-	1171255	Primary	55	1027	2.20117	693	1.55396	UUUUAAAUUUAAACUUUUUUUAAAAUUUUUAGAAU
		-	1171232	Secondary	78	75	1.5597	36	1.08511	AAAUUUUUAGAAUAGAGAUUUAUUUUAUUUUAAAUU
		-	1171242	Secondary	68	101	1.42616	3	1.00616	ACUUUUUUUAAAAUUUUUAGAAUAGAGAUUUAUUUU
		-	1171244	Secondary	66	86	1.24157	94	1.1757	AAACUUUUUUUAAAAUUUUUAGAAUAGAGAUUUAUU
MMP1189	1	-	1171690	Primary	38	39	1.50649	13	1.14942	CUGAUAAAUACUUUUUUUAUUUCAAUUUUUGAAGU
MMP1190	4	-	1172468	Primary	48	54	1.55102	6	1.15	AUUAUGUCUUUUUUCAAUAUUUAGAUUUUUAGAUA
		-	1172458	Secondary	58	32	2.45448	1	1.02941	UUUUUCAAUAUUUAGAUUUUUAGAUAUUUUUGGUGA
		-	1172476	Secondary	40	29	1.13303	1	1.01754	UUUAACAAAAUUAUGUCUUUUUUCAAUAUUUAGAUU
		-	1172484	Secondary	32	39	1.13929	1	1.01754	UUUGCUUUUUUAACAAAAUUAUGUCUUUUUUCAAUA
MMP1191	3	+	1174185	Primary	55	339	1.82082	189	1.86697	AUAAAUACUAAAUUUUAAUAUCUAUUUUUUAAAAU
		+	1174195	Secondary	65	91	1.73386	43	1.74137	AAAUUUUAAUAUCUAUUUUUUAAAAUAUAUUUCGUG
		+	1174200	Secondary	70	7	1.29165	0	1	UUAAUAUCUAUUUUUUAAAAUAUAUUUCGUGUUUUG
MMP1194	1	+	1182612	Primary	23	30	5.99917	18	2.05876	GCAGUAACUUCUUUAUAUUUUACUUUUUUUGUGAA
MMP1196	5	+	1183758	Primary	68	17	1.56665	4	1.1739	UUUCUUAAUCGAAAUUAAUUAUCGUUUUUUUACCG
		+	1183715	Secondary	25	14	1.13861	6	1.12245	UCUUAAAUUUAUUUAAUAUUUUUUAGUUUUUAUUUA
		+	1183718	Secondary	28	10	1.10989	5	1.11905	UAAAUUUAUUUAAUAUUUUUUAGUUUUUAUUUAUGC
		+	1183721	Secondary	31	11	1.15068	0	1	AUUUAUUUAAUAUUUUUUAGUUUUUAUUUAUGCCUU
		+	1183734	Secondary	44	6	1.10714	2	1.05882	UUUUUAGUUUUUAUUUAUGCCUUAUUUUCUUAAUCG
MMP1197	2	+	1184765	Primary	131	7	2.16647	15	1.74996	UGUUGCAGUUGAUAAUGUAGAUUUAUCUGUAAAUC
		+	1184693	Secondary	59	6	1.23999	6	1.10714	CCGGAAAAGAUAAUAUGUCAGUUUUAGAACUUAAAA
MMP1198	3	+	1185492	Primary	51	28	1.49999	18	1.25714	UUUAUAUAUUUUUAAAACAUAUUCUUUUUUAAUGA
		+	1185502	Secondary	61	6	1.20689	3	1.05769	UUUUAAAACAUAUUCUUUUUUAAUGAACUAUUAUUC
		+	1185523	Secondary	82	8	1.72721	2	1.04444	AAUGAACUAUUAUUCAAAUUAUAUGAAAUUUAAUUC
MMP1199	1	+	1186420	Primary	22	24	1.95996	5	1.06329	UAAAAUAAUUACUUUAUAAAAAUCUUUUUUGAUAG
MMP1200	4	+	1187868	Primary	24	65	1.53719	47	1.62666	UUGUAAAUUAAAUUCUUUUUAAACUUUUUUAAAAA
		+	1188008	Secondary	164	36	1.89998	5	1.08474	AAGUCGUAUCUUAACAUUAUAUCCACCCAAGGAGGA
		+	1188022	Secondary	178	6	1.37498	5	1.10638	CAUUAUAUCCACCCAAGGAGGAUAUUUAUUUUUAAA
		+	1188042	Secondary	198	9	2.28553	4	1.09091	GAUAUUUAUUUUUAAAAGUAUUUACGAAUUUCGAAA
MMP1201	1	-	1188060	Primary	35	14	1.87495	7	1.12281	UAAAAUAUGAAUCAUUUUUUUAAUUUUUUUAGCAC
MMP1204	1	-	1190160	Primary	30	14	1.55998	7	1.18421	CUUACAUUUUUAUCAUAUGUUUAUUAUUUUGUGAU
MMP1206	5	+	1194110	Primary	22	618	1.50531	258	1.41951	AAAUCUAAUUACCUUUUUUUAAAUAUUUUUAUUGU
		+	1194115	Secondary	27	78	1.28889	33	1.1441	CUAAUUACCUUUUUUUAAAUAUUUUUAUUGUAAUGU
		+	1194120	Secondary	32	76	1.43678	13	1.07428	UACCUUUUUUUAAAUAUUUUUAUUGUAAUGUUUACC
		+	1194126	Secondary	38	38	1.94998	3	1.06522	UUUUUAAAUAUUUUUAUUGUAAUGUUUACCCCAAAU
		+	1194143	Secondary	55	7	1.3684	5	1.13157	UGUAAUGUUUACCCCAAAUUCUGUCGAUUCUAAUCG
MMP1207	7	+	1194695	Primary	23	433	1.61769	259	1.29101	CGAAUAAAUUAACUCUUUUUUUCUCUUUUAAUUGG
		+	1194698	Secondary	26	121	1.23866	55	1.07079	AAUAAAUUAACUCUUUUUUUCUCUUUUAAUUGGUCA
		+	1194706	Secondary	34	65	1.17711	20	1.03683	AACUCUUUUUUUCUCUUUUAAUUGGUCAGGCUUUUU
		+	1194739	Secondary	67	22	1.12717	18	1.04027	UUUUAAAGAUUAUAUAUCUAUAUAAAGUAUUAGCCA
		+	1194743	Secondary	71	31	1.22143	24	1.05811	AAAGAUUAUAUAUCUAUAUAAAGUAUUAGCCAUAAA
		+	1194762	Secondary	90	16	1.17204	8	1.02073	AAAGUAUUAGCCAUAAAGUGAUUAUAGUUUUAACGU
		+	1194768	Secondary	96	17	1.24637	58	1.18954	UUAGCCAUAAAGUGAUUAUAGUUUUAACGUCAUUUU
MMP1208	4	+	1196091	Primary	25	207	2.19652	150	1.31315	UAUAACUUUUUUAUUAUUUUUUUAACAUUUGGGUG
		+	1196084	Secondary	18	113	1.23203	115	1.15499	AAUAAUAUUAUAACUUUUUUAUUAUUUUUUUAACAU
		+	1196152	Secondary	86	10	1.13889	11	1.03929	UCUCUAAAAAAGAGGAUAUAUGUUCUAAAAUAAAAA
		+	1196168	Secondary	102	16	1.48483	19	1.1027	UAUAUGUUCUAAAAUAAAAAAUAUCGAUUUUAACUU
MMP1209	1	+	1197195	Primary	28	12	1.41378	34	1.16505	AAUUUAUUUUAAAACUAUUUUUUCAAUUUUAAAUA
MMP1210	5	+	1197997	Primary	5	112	1.35897	67	1.18356	AAAACGAUUAAAAGAAAUGAAAUAAUUUUUUUUGU
		+	1198000	Secondary	8	32	1.125	13	1.04037	AACGAUUAAAAGAAAUGAAAUAAUUUUUUUUGUUUA
		+	1198006	Secondary	14	92	1.86792	52	1.20077	UAAAAGAAAUGAAAUAAUUUUUUUUGUUUAUAUUGU
		+	1198081	Secondary	89	9	1.11111	54	1.31395	GCAAAUGAAAGAAGUAGGUAUUGUAGGAUAUGGAAG
		+	1198136	Secondary	144	9	1.10112	15	1.08571	AUAAAAGCUGAAGAUAUCGCUGGUGCUUGGGGUAAA
MMP1211	1	+	1199236	Primary	132	26	1.31707	50	1.29586	GCAGGAGUUAAAGCAAUUAGUGAUGCAAACGUUGA
MMP1212	1	+	1200457	Primary	156	112	1.92561	136	1.62963	CAAGAAGUGUCUGCCCAGAAUGCAGAAGAAAAGGA
MMP1213	7	+	1200755	Primary	23	866	1.61813	246	1.32031	ACAAUAAAUAAUUACAUUUUUUAUUUUUUUAAUUA
		+	1200759	Secondary	27	66	1.10138	21	1.04357	AUAAAUAAUUACAUUUUUUAUUUUUUUAAUUAAAAU
		+	1200765	Secondary	33	112	1.23236	8	1.02367	AAUUACAUUUUUUAUUUUUUUAAUUAAAAUUAGCAA
		+	1200792	Secondary	60	129	1.54893	40	1.15385	AAUUAGCAAGUUCUAAUUACCAUUAAAUUUUGAUAU
		+	1200799	Secondary	67	35	1.23649	20	1.09346	AAGUUCUAAUUACCAUUAAAUUUUGAUAUUUCGUAU
		+	1200807	Secondary	75	19	1.2923	10	1.0565	AUUACCAUUAAAUUUUGAUAUUUCGUAUUUUAAUGA
		+	1200892	Secondary	160	15	1.12195	14	1.04389	AUUGAUAAUUCGUCCAAUUUUUUACAUUUCUCAGCU
MMP1215	1	-	1201505	Primary	45	13	1.99992	17	1.1619	AAAUUUUUAAUACUUUUUUUAAAGAUUUUUAAUAU
MMP1216	1	-	1203126	Primary	26	9	1.29999	44	1.29932	AUAACUCUUAUUUUUCAAUUUUAUUUUUUUAACAA
MMP1217	2	-	1204293	Primary	22	14	1.32557	1	1.01124	UACUUUAAUUUUUUUAUUCAUUUUUAUUUUAGUUU
		-	1204283	Secondary	32	9	1.52938	2	1.0274	UUUUUUAUUCAUUUUUAUUUUAGUUUAUUUUAUUUA
MMP1220	2	-	1208479	Primary	20	12	1.33332	11	1.13253	CAGUGAUUAAUCUCUUUUAAAUUUUAUUUUAAGUC
		-	1208484	Secondary	15	8	1.14814	6	1.06	AUUUUACAGUGAUUAAUCUCUUUUAAAUUUUAUUUU
MMP1221	1	-	1210141	Primary	18	14	1.99993	4	1.11111	ACUUUAAAAUAGAUUUUAUUAGUCUUUUUUAGAUA
MMP1222	5	+	1211865	Primary	44	254	1.66667	189	1.2662	UAAAAAUAAAUUUUAAUAUUUUCUUUUUUCAUUAA
		+	1211868	Secondary	47	90	1.35714	54	1.08599	AAAAUAAAUUUUAAUAUUUUCUUUUUUCAUUAAAAU
		+	1211874	Secondary	53	41	1.25309	13	1.02621	AAUUUUAAUAUUUUCUUUUUUCAUUAAAAUUAAAAA
		+	1211892	Secondary	71	20	1.15504	14	1.0307	UUUCAUUAAAAUUAAAAAAAUAGAAAUUUUUGAGUA
		+	1211939	Secondary	118	24	1.23077	124	1.44765	UUAAAUUAUUUUAUCAUUCCCAUUUCUUUUUGCCGU
MMP1224	6	+	1214473	Primary	27	65	1.20505	29	1.11197	UAAUUACCAUUAUCCAAUUACUUUUUUAUUCAACU
		+	1214485	Secondary	39	28	1.13023	15	1.07353	AUCCAAUUACUUUUUUAUUCAACUAAAUUUUCAGUU
		+	1214496	Secondary	50	31	1.23664	15	1.08721	UUUUUAUUCAACUAAAUUUUCAGUUAUUUUUAUUUA
		+	1214500	Secondary	54	36	1.43373	7	1.04516	UAUUCAACUAAAUUUUCAGUUAUUUUUAUUUAAAAA
		+	1214524	Secondary	78	8	1.16	4	1.03478	UUUAUUUAAAAAAUAUUAAAUACCCCCUCAUAAAAA
		+	1214533	Secondary	87	13	1.49998	15	1.16304	AAAAUAUUAAAUACCCCCUCAUAAAAACUAUAAUGU
MMP1225	1	+	1215423	Primary	97	8	1.42103	2	1.02985	GGGGUUAUCCAUAUCCCCUUUUUCAUUUAUAAAUU
MMP1229	1	+	1218359	Primary	59	21	2.74985	3	1.17646	AUAUGAUAAACCCAUAUUCUUUUAAUUUUUAAGAA
MMP1230	1	+	1219448	Primary	17	10	1.71423	1	1.03226	AUUAGCUAAAUAAUUAAUUUUCUUCUUUUUAGGGU
MMP1231	2	+	1219962	Primary	53	23	1.65712	29	1.39189	AAUCUCUUUUAAAAUUUCUUCAAUUUUUUUAAGGU
		+	1219952	Secondary	43	8	1.1194	0	1	AUUUAAAAUUAAAUCUCUUUUAAAAUUUCUUCAAUU
MMP1233	2	-	1220860	Primary	13	8	1.27585	2	1.16665	UAGAUUUUAAAUCAUAAAAUUCUAUUUUUUAUUAC
		-	1220857	Secondary	16	6	1.33332	1	1.0909	GAUUUUAAAUCAUAAAAUUCUAUUUUUUAUUACAAU
MMP1235	1	+	1222816	Primary	25	6	1.35292	3	1.12499	ACUAAAUCAUUCUAAUUUAUUUUAAUUUUUAAAAA
MMP1237	1	+	1223853	Primary	49	40	3.49984	30	1.57691	AAAAACAAAUACUAUUUUUAAAAUUAUUUUAGAAA
MMP1241	2	+	1227288	Primary	114	32	1.32	32	1.23529	UUUCUUCCAAAAGGCAUUUUUCUAUUUUUUCUAAA
		+	1227237	Secondary	63	19	1.12025	10	1.05848	AUUGCUUUUCUUGCAUUUUCAAUUAUUUUUUCAUCA
MMP1242	2	-	1227150	Primary	35	21	1.14483	4	1.0241	UUAUUUUAUUCUUCUUUUACGUAAUAUUUUACCAU
		-	1227050	Secondary	135	9	1.12162	10	1.07576	ACAUAUACAUUUUCUAUAUUUUUGUAUUUUUCACCA
MMP1245	1	+	1230504	Primary	3	6	1.35292	1	1.03333	AAAGCUUUCUCAAAAUUAAUGAAAUAAUUUGAAUA
MMP1246	1	+	1230857	Primary	91	14	2.74978	35	2.24995	GGGACGAACCAUCUGGCAAGGCGAAGCCAUCGAAG
MMP1247	2	+	1231300	Primary	106	7	1.11111	10	1.08929	GGAGAAAAGAUGGAUAUCUGCGUAAAAGACGGAAA
		+	1231371	Secondary	177	7	1.13207	10	1.11236	UUGAUGCAAAUAAUAAAGUAGUAAUGGCAGGCGGUG
MMP1248	1	+	1232941	Primary	21	10	1.35713	9	1.15789	AUACAAUAAGGAAAUCUUAUUUAAUCUUUUUAAGG
MMP1249	3	+	1233789	Primary	17	484	3.63042	410	2.33116	AAACUUAAUCUAAUACUUUUUUUAAUUUUUGAAAU
		+	1233801	Secondary	29	49	1.63636	24	1.27586	AAUACUUUUUUUAAUUUUUGAAAUUAAUGCUAUUUU
		+	1233818	Secondary	46	23	1.74191	12	1.23077	UUGAAAUUAAUGCUAUUUUGAAUUAUUUUUUAUACU
MMP1251	1	+	1235158	Primary	139	10	1.43476	11	1.16176	AAGGAAAACGUCAGAAGGAUAUGUGUUGCGGAUCC
MMP1252	3	+	1235926	Primary	45	80	1.62992	49	1.24378	UUACUAACUUUUUUCAUAUUUUUAUUUUUCAAUGG
		+	1235943	Secondary	62	33	1.57894	50	1.47619	UAUUUUUAUUUUUCAAUGGCAUUUAUUUUUUAUAGU
		+	1235967	Secondary	86	17	2.30759	6	1.1	AUUUUUUAUAGUGAAAUUUACUAUUAUUUUUCAAAU
MMP1255	7	+	1239758	Primary	43	65	1.46762	36	1.1809	UUUGACAUAAAUUAAUUUAGAUCAUUUUUUUAAUU
		+	1239731	Secondary	16	59	1.24894	25	1.08772	AUAACAAUUGAAUAACUAUUUUAACUUUUUUGACAU
		+	1239765	Secondary	50	29	1.61701	16	1.13333	AUAAAUUAAUUUAGAUCAUUUUUUUAAUUUCGAAAG
		+	1239772	Secondary	57	11	1.28947	0	1	AAUUUAGAUCAUUUUUUUAAUUUCGAAAGGUGAACA
		+	1239797	Secondary	82	6	1.125	6	1.05128	AAAGGUGAACAAUCUUGCAACUUUUUAUUUUAGAUA
		+	1239898	Secondary	183	7	1.14893	7	1.06364	GCACAGAUUUUAUCAACAGUUCACCACAUUCAUGAU
		+	1239906	Secondary	191	10	1.45453	0	1	UUUAUCAACAGUUCACCACAUUCAUGAUUCAAUUUA
MMP1257	2	-	1240222	Primary	63	10	1.3846	8	1.06504	CUUUAAAUACCACGCAGGUGCUUUUCUUUUAGACC
		-	1240248	Secondary	37	8	1.13793	7	1.05036	UUUGUUAUUAUUUUUAUCUUUAAUUCCCUUUAAAUA
MMP1259	4	-	1242053	Primary	39	65	1.78312	29	1.26126	UCGGCAUCUCAGCCUUUUUUAAACUUUUUUAUUGA
		-	1241978	Secondary	114	6	1.99983	2	1.08333	UUUUUGAUUACGACAUAUAUUAUAUAAUUUUAACAA
		-	1242004	Secondary	88	16	2.0666	6	1.11538	AACUAUUAUAUUGUUUUAAACUAUAAUUUUUGAUUA
		-	1242018	Secondary	74	10	1.27777	9	1.15	AAUUUGAAAACAAAAACUAUUAUAUUGUUUUAAACU
MMP1260	7	-	1243622	Primary	26	413	1.98804	343	1.67255	AUAAUUUUCAUAAACUUUCUUUUUUUAUUUAAUUA
		-	1243601	Secondary	47	9	1.27272	14	1.20588	UUUUUUAUUUAAUUAUAAUGUACUCUAUUUUAAGAA
		-	1243606	Secondary	42	9	1.1875	0	1	UUUCUUUUUUUAUUUAAUUAUAAUGUACUCUAUUUU
		-	1243611	Secondary	37	73	1.83907	1	1.0087	UAAACUUUCUUUUUUUAUUUAAUUAUAAUGUACUCU
		-	1243616	Secondary	32	73	1.38624	46	1.16487	UUUCAUAAACUUUCUUUUUUUAUUUAAUUAUAAUGU
		-	1243619	Secondary	29	36	1.12287	35	1.09887	AAUUUUCAUAAACUUUCUUUUUUUAUUUAAUUAUAA
		-	1243626	Secondary	22	209	1.15833	189	1.15454	AUACAAUAAUUUUCAUAAACUUUCUUUUUUUAUUUA
MMP1261	2	-	1244874	Primary	37	57	1.49565	32	1.23021	AUUUCUUUUUUUUAAAUUUUUAAACUUUUUAAAAU
		-	1244849	Secondary	62	28	1.9333	21	1.31343	CUUUUUAAAAUUAUCAAGUUUAUAUUUUUUUACUGU
MMP1265	2	-	1248348	Primary	54	9	1.59996	4	1.21052	UUUUAAGUAUUUUUAACUUUUAAAUAUUUUAUAUU
		-	1248357	Secondary	45	8	1.22222	1	1.04167	UUAUUAAUUUUUUUAAGUAUUUUUAACUUUUAAAUA
MMP1270	1	-	1253841	Primary	70	38	2.26662	7	1.12069	UAGAUUUCUUUUAAAAAUUCUAAUUCUUUUGAAGU
MMP1271	2	-	1255273	Primary	39	31	1.30693	10	1.11236	UUAAAUUAACAAAUAUUUUUUAAAUAUUUUAAUUU
		-	1255247	Secondary	65	21	1.99995	18	1.46153	AUUUUAAUUUACCAAGAUUUAUUUAUUUUUUAAUCG
MMP1273	1	-	1257655	Primary	164	14	1.87495	23	1.63887	ACUUCCCAAUGGUUGGAAGGAAGUUUGUUCAGGCA
MMP1274	2	-	1258114	Primary	28	161	2.12587	31	1.40259	AAUUAACUAUCAUAAAAAAUUAUUUUUUUUAAGAU
		-	1258101	Secondary	41	18	1.99994	3	1.08823	UAAAAAAUUAUUUUUUUUAAGAUACAUUGAUCGAAA
MMP1276	2	+	1261173	Primary	43	11	1.21153	3	1.06	AUUUAUUCAAUUUUUACAAAAUUAAUUUUUCCGUC
		+	1261266	Secondary	136	6	1.13043	2	1.03571	AUGUGCCCCACGGGACUCUUUUCUAAGGAGGGCUGA
MMP1277	1	-	1261129	Primary	17	9	1.24999	10	1.23809	AAAAAUUGAAUAAAUUACUUUUUUGUUUUUAGUCU
MMP1280	2	-	1263588	Primary	149	102	1.36042	86	1.67187	AUUCUAUCCAAGCUAAACCACGGGCCCAAAAUUAU
		-	1263562	Secondary	175	85	1.93406	36	2.12496	CCAAAAUUAUAUAUCAUUUUAAGAAGUACUUUUCAA
MMP1281	1	+	1264719	Primary	66	15	1.18072	8	1.09302	AUAAUUCUUAAUUUACGUUAAUUAUUUUUUUAAAC
MMP1282	1	-	1264637	Primary	60	18	1.33962	9	1.11111	UUAAAUUAUAUCUUUAAUUUUUACUUUUUUGAUAG
MMP1284	1	+	1268118	Primary	81	9	1.59996	5	1.1923	UCGACAUUAAUAAACCUGUUUUCUUCUUUUGUAAA
MMP1286	3	+	1270735	Primary	71	13	1.40624	13	1.24999	GGAUGAACUCAUCCAAUUACACCAGCUUUUGGUUU
		+	1270685	Secondary	21	12	1.22222	8	1.11111	UGUAGCUUAAAUAACAAUUUCUUUUAAAUUUAAAGG
		+	1270829	Secondary	165	10	1.16129	4	1.03571	AUAUGAUGAUUUAAAUAUAAGGCCUCACCACAUUCA
MMP1287	2	+	1271019	Primary	28	27	1.71051	5	1.08333	AAUAUUUUUAUUUUUGUUUAAUUUACUUUUCAGGU
		+	1271004	Secondary	13	26	1.29545	7	1.09333	GCUAGAAAAAAACGAUAAUAUUUUUAUUUUUGUUUA
MMP1289	6	-	1272333	Primary	38	310	1.94225	85	1.08407	UUCCUAUUUUUUUUCAAAAUAAAAAUUUUUAAAAA
		-	1272186	Secondary	185	7	1.13461	1	1.00524	AUUUAUUUUUAUGGUCCGCUGAUGGAUCUAAAGAUG
		-	1272249	Secondary	122	14	1.14583	12	1.02956	UAAUAAAUUCCUCUUUUCCUUUUAACAAACUCAUUG
		-	1272256	Secondary	115	48	1.36923	188	1.33813	UCUGCUCUAAUAAAUUCCUCUUUUCCUUUUAACAAA
		-	1272325	Secondary	46	30	1.10563	-2	0.998049	UUUUUUUCAAAAUAAAAAUUUUUAAAAAAGUAUAAG
		-	1272349	Secondary	22	266	1.28695	143	1.11504	AAAGAUUAAUUGGUUAUUUCCUAUUUUUUUUCAAAA
MMP1290	1	-	1272836	Primary	182	19	1.25	34	1.13821	AGAACUAUAGAAAGAAGAUCGUACACAAGAAAAGA
MMP1292	1	-	1274980	Primary	37	8	1.5333	0	1	CAUAUUAUAUACUAUUAAUAACACUAUUUUCAUGU
MMP1293	1	-	1276924	Primary	62	7	1.43747	6	1.13636	UAAGACUUAAUUUUGAUUUUUACAUUUUUUAUGUC
MMP1294	1	+	1279853	Primary	19	7	1.46664	1	1.04545	ACUACUUUUAAAUAACCAUAACUAUUUUUCAGGAG
MMP1295	2	+	1281192	Primary	10	9	1.42855	3	1.14285	ACAUUAUAACUUCCAAAUAAUUUUAUUUUUGAGAG
		+	1281256	Secondary	74	7	1.87489	1	1.05882	UUAAAGACUUUUCAAACGUUUCUAUUUUUUUAGCAU
MMP1297	3	-	1282448	Primary	174	560	4.54428	1156	2.52708	AUUUUGUAACCCCCUAAUUCUUUUUCUUUUGAAAU
		-	1282440	Secondary	182	34	1.62962	7	1.01763	AACCCCCUAAUUCUUUUUCUUUUGAAAUGUUUUCAA
		-	1282578	Secondary	44	150	1.12058	177	1.0723	UAUUUAUUAAUUAUUUAUUUUUUAAUUUUUUAAGUU
MMP1298	2	-	1283688	Primary	133	63	1.62376	165	1.62264	UGCAGUUACUGCACUCUUCAAAUAUCUUUUAGACA
		-	1283676	Secondary	145	11	1.14865	36	1.18461	CACUCUUCAAAUAUCUUUUAGACAAGGGUAUUGUUG
MMP1299	5	-	1285996	Primary	151	5218	1.52905	3226	1.51782	UAAUAUACUUAACUAUAUCUACCAUUUUUUGUAUU
		-	1285976	Secondary	171	95	1.1201	18	1.04466	UACCAUUUUUUGUAUUUUAAUUUAUUCAUUUAAUCU
		-	1285981	Secondary	166	484	1.32948	189	1.19606	AUAUCUACCAUUUUUUGUAUUUUAAUUUAUUCAUUU
		-	1285984	Secondary	163	477	1.21692	65	1.04917	ACUAUAUCUACCAUUUUUUGUAUUUUAAUUUAUUCA
		-	1285989	Secondary	158	4543	2.47118	2061	2.0899	ACUUAACUAUAUCUACCAUUUUUUGUAUUUUAAUUU
MMP1300	1	-	1286618	Primary	2	40	1.15152	7	1.01994	AUAUGGAAUCGGUGUCCGAAAAAUCUAAAAAUACA
MMP1301	4	-	1287162	Primary	29	331	1.42765	681	1.48573	AAGAUGAAGACUACUAACUUCAUCUUUUUGGUGUU
		-	1287061	Secondary	130	47	1.16549	99	1.28696	UAUUUCGCUGAUGAUAUGCUUGGUAUUUACCGCAUG
		-	1287150	Secondary	41	41	1.10789	30	1.05515	UACUAACUUCAUCUUUUUGGUGUUAAAAUGCAGUUA
		-	1287157	Secondary	34	84	1.17721	159	1.16528	UGAAGACUACUAACUUCAUCUUUUUGGUGUUAAAAU
MMP1302	6	-	1288231	Primary	29	1807	2.02729	1246	1.42209	AUCUUAAUUUUCUACUUUUAUUUUAUUUUUAAAUA
		-	1288126	Secondary	134	23	1.5111	7	1.03256	CUAUAAAUUACCCUUUUUUUGGACUAUAACGCAGUA
		-	1288131	Secondary	129	32	1.32323	83	1.1895	AAUUUCUAUAAAUUACCCUUUUUUUGGACUAUAACG
		-	1288137	Secondary	123	228	2.28089	503	1.80868	UUAUUUAAUUUCUAUAAAUUACCCUUUUUUUGGACU
		-	1288219	Secondary	41	165	1.17857	8	1.0038	CUACUUUUAUUUUAUUUUUAAAUAUGCAGUUACUAA
		-	1288222	Secondary	38	152	1.13475	40	1.01894	UUUCUACUUUUAUUUUAUUUUUAAAUAUGCAGUUAC
MMP1303	3	-	1288685	Primary	30	10	1.21276	4	1.03809	AUUAUUAUAUUAAUUUUUUUAAAAUUUUUUAAAGG
		-	1288591	Secondary	124	7	2.39972	5	1.10638	UUUUAAUAUUUAUUUUACAAUUUUUAUUAUUAAUAA
		-	1288655	Secondary	60	7	1.19444	0	1	UAAAGGAAAAGUGACAUUUUACACUUAUUUUUAAAU
MMP1306	3	-	1292642	Primary	24	48	1.43636	58	1.36942	AUUUAAAUUUUCUUAUUUUUUUUAUUUUUAAUUAA
		-	1292626	Secondary	40	7	1.11111	4	1.03101	UUUUUUUUAUUUUUAAUUAAAAUUCGAAUUUAAGAA
		-	1292632	Secondary	34	12	1.14815	1	1.00746	UUCUUAUUUUUUUUAUUUUUAAUUAAAAUUCGAAUU
MMP1308	4	-	1294651	Primary	33	224	2.32544	432	2.03846	CUUUUAAUUUAUUUUAUUUCGAUUUUUUUUAUAAA
		-	1294584	Secondary	100	7	1.26922	5	1.06667	AAACGGGCUUAUCAGUCUUUAAAAAACUUUUCAAAC
		-	1294640	Secondary	44	24	1.42104	5	1.05747	AUUUUAUUUCGAUUUUUUUUAUAAAUUCGGUGGUUU
		-	1294643	Secondary	41	12	1.13953	57	1.475	UUUAUUUUAUUUCGAUUUUUUUUAUAAAUUCGGUGG
MMP1310	2	-	1296028	Primary	26	45	1.68181	124	1.61083	UUAAUUUUAUUAUUUUUUUAACUUUUUUUUGGUGA
		-	1296026	Secondary	28	8	1.15384	-3	0.983517	UAAUUUUAUUAUUUUUUUAACUUUUUUUUGGUGAAA
MMP1314	2	-	1298494	Primary	17	49	1.92451	36	1.30769	AGAAAAAAAUUAAUCAAAUUAACUUUUUUUGGCGU
		-	1298419	Secondary	92	13	1.56519	16	1.19047	UACCCAAAACAGAAAUCUCUUUAAAAUUUUUAAGAA
MMP1315	3	-	1301038	Primary	79	15	1.5357	13	1.3611	AUUGUUUAAAUUUCUAAAAUACUAAUUUUUAUGGU
		-	1301031	Secondary	86	7	1.53842	0	1	UAAAUUUCUAAAAUACUAAUUUUUAUGGUUUAAAUU
		-	1301087	Secondary	30	9	1.14062	3	1.04545	AAUUAAAAUAUUUUAUUUAACUUUAAACUUUCAUAU
MMP1318	2	-	1303441	Primary	38	24	1.47058	6	1.09836	AAAACUCUUUUUUUUAUUUUUUAAUUACUUAAAUC
		-	1303430	Secondary	49	17	1.77269	3	1.06	UUUUUAUUUUUUAAUUACUUAAAUCGAUUUUAUCAA
MMP1319	3	+	1306378	Primary	24	205	1.54666	317	1.3238	AAAUAAUAAAAUAAUAAAAAGGUGAAAAAAUGGGA
		+	1306425	Secondary	71	69	1.22772	56	1.06519	AUUGGGUAAAAAAUACGACACACCUAACCAUCCAUG
		+	1306476	Secondary	122	38	1.12969	90	1.12587	CCAGAAAGAAAAAGAAAUUAGCCAAAAAUAUGGGUU
MMP1321	2	+	1307389	Primary	91	26	1.12037	18	1.05941	AAAUGGAAUUAAAAGCCCCUUUAUCUUUUUCCAGU
		+	1307439	Secondary	141	19	1.12667	37	1.16157	AAUGAUUUCAGAAGUUCCUACAUAUGCUAUUGAAAA
MMP1322	1	+	1307920	Primary	22	96	1.71641	45	1.225	AAAAUUAAUUACUCUUUCUUCCAAAUUAUUGGAAA
MMP1324	1	+	1308931	Primary	180	52	1.74285	78	1.375	GGAACCUGUUAUCUUAGCAGGCGAAGCUUUAAGCA
MMP1325	3	+	1309196	Primary	27	667	2.79784	214	1.53367	UAAUUAUUUUUCUUUCCCUUUACGUUUUUUAGGUG
		+	1309200	Secondary	31	79	1.50318	-1	0.997319	UUAUUUUUCUUUCCCUUUACGUUUUUUAGGUGGUAA
		+	1309288	Secondary	119	16	1.125	48	1.15534	UUAUGAAGAAUACAGAACUAGACUCAAAAAUGGCGA
MMP1326	5	+	1309486	Primary	72	145	2.47958	284	2.12698	CGUGGGGUAGCCUGGCCAUCCUGUGCGUCUGGGGG
		+	1309435	Secondary	21	65	1.10569	144	1.06834	AUAUAAAUAAUUACCUUAUUAUUUACUUAUUACCUA
		+	1309446	Secondary	32	95	1.23809	351	1.25866	UACCUUAUUAUUUACUUAUUACCUAUCUAUUCAGAC
		+	1309451	Secondary	37	121	1.72455	468	1.85714	UAUUAUUUACUUAUUACCUAUCUAUUCAGACGGGGC
		+	1309454	Secondary	40	15	1.10869	4	1.00825	UAUUUACUUAUUACCUAUCUAUUCAGACGGGGCCGU
MMP1327	4	+	1309756	Primary	20	194	3.25579	156	1.65272	UAAAAAUUAAAUAACUAUUUUAAAUCUUUUGGGGG
		+	1309763	Secondary	27	8	1.12308	7	1.03317	UUAAAUAACUAUUUUAAAUCUUUUGGGGGAUUUUCG
		+	1309765	Secondary	29	11	1.21153	38	1.22754	AAAUAACUAUUUUAAAUCUUUUGGGGGAUUUUCGUG
		+	1309911	Secondary	175	30	1.85712	18	1.08491	AAAUGCAGAAAAUCCUGACUAUAUAAUUUCUGAUGU
MMP1328	2	+	1310761	Primary	58	17	1.15596	13	1.02448	AAAAAAAUGAGGGGAUAAAAUGAGUGUUGUAAUUG
		+	1310716	Secondary	13	13	1.10317	11	1.02111	AAUAUUACAAGAUUUUAAUACUUUGAGUUUUAAAAU
MMP1329	1	+	1310985	Primary	46	109	1.27877	190	1.18483	UAAUUUAACUUAUUCAGAAUUUUCUUUUUUGACUC
MMP1330	2	-	1310927	Primary	38	53	1.11572	56	1.05013	AAAAAAAUAAUUAAUAUUUAGUCUUCUUUUACUGU
		-	1310839	Secondary	126	39	1.11404	13	1.01313	GAUUCUUUUGCAACAACUACUUUGUCGUCCUGAAUU
MMP1331	1	-	1311307	Primary	21	8	1.72721	7	1.08642	CCUUUUUAAUGAUCUUUUUUUAAAAUUUUUAUCGA
MMP1332	1	-	1311817	Primary	23	10	1.90901	0	1	GUUUUAAAUACGAAUUAAAUUAUAUUUUUUAAAAA
MMP1333	1	+	1314345	Primary	146	22	1.56409	580	2.12621	ACCUGUAUGUUAUCUACAAGCAAGUGCACUAUAAA
MMP1334	4	+	1315813	Primary	77	26	1.17687	5	1.03597	CCAAUUACACCAAUUUUUUUUAGUUCUUUUAACAA
		+	1315837	Secondary	101	12	1.11538	3	1.025	UUCUUUUAACAAUUCUUCACGAUCUUCCUUUAACAA
		+	1315882	Secondary	146	8	1.12903	0	1	AGAACCUCCUCCUCCGGCACCUGUUAAUUUUCCCCC
		+	1315889	Secondary	153	6	1.13043	1	1.01587	CCUCCUCCGGCACCUGUUAAUUUUCCCCCGUAAGCG
MMP1337	3	+	1318761	Primary	46	48	1.82757	22	1.3492	AUUAAGAAAUAUUUCAAAAAUACUUUUUUUAAAUU
		+	1318766	Secondary	51	6	1.12766	3	1.05454	AGAAAUAUUUCAAAAAUACUUUUUUUAAAUUAGAUU
		+	1318776	Secondary	61	13	1.76466	16	1.57141	CAAAAAUACUUUUUUUAAAUUAGAUUAUUUUAAUCA
MMP1338	1	+	1319076	Primary	37	21	1.913	13	1.43332	AAAUAUUCAUAUUAUUCUUUUUUAGCUUUUAUAAU
MMP1343	2	-	1324381	Primary	108	7	1.43747	16	1.12903	CAAUAUCGAUCAAGUCUUUUUUUAGUUUUUUAUCG
		-	1324465	Secondary	24	7	1.16279	18	1.10714	AUAUUAAACCGAUUUUUUAAUAUUUAUUUUAAAUAA
MMP1345	4	-	1325669	Primary	111	10	1.26315	6	1.02844	CCAAAAUAACUCAAAUGAAACUUUAUUUUUAAAUA
		-	1325608	Secondary	172	8	1.88879	61	1.70114	UGAAGUAGAAUUAAAUAAUAGUUUUGAAUCCGACAA
		-	1325655	Secondary	125	6	1.26086	1	1.00562	AAUGAAACUUUAUUUUUAAAUAAUACUUCAUCCGAA
		-	1325657	Secondary	123	6	1.19999	15	1.0838	CAAAUGAAACUUUAUUUUUAAAUAAUACUUCAUCCG
MMP1347	8	-	1327423	Primary	29	2443	2.19113	2650	1.57772	AUUACUUUAACAAUUUUUUUACUUUUCUUUACUAC
		-	1327340	Secondary	112	8	1.36362	16	1.08421	UUUUGUGAAAGAUUAUUUUUUUAAUAUUAUUCAAGU
		-	1327401	Secondary	51	20	1.28169	62	1.15979	CUUUUCUUUACUACUGCAUGUUUUUGUAUGUUAUUG
		-	1327408	Secondary	44	148	1.5873	250	1.33378	UUUUUUACUUUUCUUUACUACUGCAUGUUUUUGUAU
		-	1327411	Secondary	41	76	1.158	127	1.11936	AAUUUUUUUACUUUUCUUUACUACUGCAUGUUUUUG
		-	1327414	Secondary	38	106	1.1696	24	1.01811	AACAAUUUUUUUACUUUUCUUUACUACUGCAUGUUU
		-	1327417	Secondary	35	335	1.37264	329	1.23104	UUUAACAAUUUUUUUACUUUUCUUUACUACUGCAUG
		-	1327420	Secondary	32	445	1.3174	604	1.19868	UACUUUAACAAUUUUUUUACUUUUCUUUACUACUGC
MMP1348	2	-	1327814	Primary	28	6	1.39997	2	1.04255	AAUAUAAUUCUUUUUUUUAAAUUAUUUAUUACUUG
		-	1327817	Secondary	25	6	1.2857	0	1	GAGUAAUAUAAUUCUUUUUUUUAAAUUAUUUAUUAC
MMP1349	2	-	1328933	Primary	19	23	1.65712	14	1.2295	CAAUGCCUUAAAUUUAACUAUUUUUAUUUUGUGAA
		-	1328931	Secondary	21	13	1.59088	5	1.09804	AAUGCCUUAAAUUUAACUAUUUUUAUUUUGUGAAAA
MMP1352	4	-	1331691	Primary	30	28	1.17073	2	1.0129	AAAUCUUUUAAUUAACUUUUUUAAAUUUUUAAAUU
		-	1331634	Secondary	87	10	1.9999	15	1.46873	AAUUUUUUAUUAUUUUUUUAGUUUUUUUAUUAGUUU
		-	1331638	Secondary	83	24	1.61537	25	1.36231	UUAGAAUUUUUUAUUAUUUUUUUAGUUUUUUUAUUA
		-	1331684	Secondary	37	27	1.20769	13	1.09559	UUUAAUUAACUUUUUUAAAUUUUUAAAUUUUAAAUU
MMP1356	1	-	1335532	Primary	46	14	1.2295	9	1.09783	UUCAUUCUUCACAAAUCUUUUUUAAUUCUUCAAAG
MMP1358	2	-	1336794	Primary	34	57	2.5405	38	1.4086	UCAAUUAAAUUUAAUUUUUUACUGUUUUUUAGGUG
		-	1336790	Secondary	38	7	1.49996	-4	0.948053	AUUAAAUUUAAUUUUUUACUGUUUUUUAGGUGAUUU
MMP1360	3	+	1339300	Primary	29	24	1.28571	52	1.06906	ACUGCUGGUUAAUACCUGCUAAAUAUUUUUAAAAU
		+	1339307	Secondary	36	14	1.23728	9	1.01219	GGUUAAUACCUGCUAAAUAUUUUUAAAAUUUAAAAU
		+	1339376	Secondary	105	6	1.20689	181	1.48787	GAAAAUCAUGGAAUCCCGUGUCGUUGUUGAUGCAUU
MMP1361	1	+	1341014	Primary	162	7	1.25925	58	1.16066	CAGAAGAAGUGGAAAAUUAUCGCCAAGCACGUCAA
MMP1362	3	+	1342751	Primary	20	19	1.33928	74	1.14176	CAGAGCAUAACUUAAAUUAUAUUAUUUUUUAUUAA
		+	1342754	Secondary	23	8	1.17391	42	1.09459	GAGCAUAACUUAAAUUAUAUUAUUUUUUAUUAAAAA
		+	1342800	Secondary	69	6	1.17142	25	1.07508	CACGGUGAAACAUAUGGAUAGAUUUGAUGUUCCAAA
MMP1363	1	+	1345468	Primary	16	7	1.17948	29	1.05292	GAUAUGAAAAUUAAUUAUUUUCAAUUUCUUAAAUU
MMP1364	3	+	1346681	Primary	24	349	2.25539	1041	1.71204	UUAUAAUUUAAUACUUUUUUAAUUAUUUUUAAGAU
		+	1346693	Secondary	36	15	1.13889	4	1.00768	UACUUUUUUAAUUAUUUUUAAGAUAAUCGUUUUUUU
		+	1346697	Secondary	40	25	1.43859	32	1.07637	UUUUUAAUUAUUUUUAAGAUAAUCGUUUUUUUAUAC
MMP1365	3	+	1347223	Primary	48	25	1.29069	94	1.26934	GAGAAUUAAACUUAAUACAGAAGAUAUCAUGAGAA
		+	1347279	Secondary	104	6	1.10909	7	1.02713	ACUGGUGCUGACGUGAUUGAUAGCACUUCUGAUGAU
		+	1347284	Secondary	109	9	1.23684	28	1.12389	UGCUGACGUGAUUGAUAGCACUUCUGAUGAUGAAAA
MMP1366	2	+	1347724	Primary	11	10	1.11494	15	1.05556	AGCUGAAGAAAACCAAUAAGGUGAUUUUAUGGCAG
		+	1347832	Secondary	119	10	1.12658	12	1.04615	ACUACAAAUACGUUAACAAAGCUCUAAGCUUAAAAU
MMP1367	1	+	1348255	Primary	89	14	1.10769	9	1.02356	GGACAGUGAAACUGUCGCAGUUAAAGACCCAAGUU
MMP1368	2	+	1348790	Primary	24	50	1.43103	84	1.21053	AGAUAAAUUAAAUACUUUUUAUAUCUCUUUAUACA
		+	1348792	Secondary	26	23	1.27059	24	1.06575	GAUAAAUUAAAUACUUUUUAUAUCUCUUUAUACAUG
MMP1369	2	+	1351216	Primary	165	350	4.24071	579	2.79813	CUGGUAAAUCAACAACAGUAGGAAGAUUAUUAUUA
		+	1351094	Secondary	43	93	1.23907	39	1.04387	AAAUAUAUAUACCCUUUUUCACUAUCAUAUUACAAA
MMP1370	2	+	1352446	Primary	25	764	2.58506	823	1.66586	AAUAAUUUAGCUUAACUUUUUCUUCUUAUUAAACA
		+	1352454	Secondary	33	57	1.22891	2	1.00425	UAGCUUAACUUUUUCUUCUUAUUAAACACGGCAAAA
MMP1371	1	+	1352855	Primary	77	758	1.82302	731	1.58108	GUUGAGGAUUGCAAUAAAACUUCUUUUUUUCGCAU
MMP1373	4	-	1354418	Primary	23	471	1.77467	594	1.59638	AUCCUAAAUUAAAUCUAAUUUUUAUUUUUUAAAAA
		-	1354326	Secondary	115	15	1.14019	6	1.01077	AUUUCUGUUAAUUUCUCAUUCAUUGUUUUUUCAUCU
		-	1354351	Secondary	90	82	1.36937	74	1.1296	AAUUUAAGAAUUAAUUAUCUCUUUUAUUUCUGUUAA
		-	1354409	Secondary	32	47	1.12533	3	1.00474	UUAAAUCUAAUUUUUAUUUUUUAAAAAAAGUAUUUU
MMP1375	4	+	1357301	Primary	50	77	3.40618	12	1.17391	UUUUAAAUACUACUAUUUUUCAUAAUUAUUAUAAC
		+	1357291	Secondary	40	60	1.29851	9	1.08654	UUAACCAUUUUUUUUAAAUACUACUAUUUUUCAUAA
		+	1357298	Secondary	47	17	1.11724	2	1.02326	UUUUUUUUAAAUACUACUAUUUUUCAUAAUUAUUAU
		+	1357308	Secondary	57	7	1.3684	0	1	AUACUACUAUUUUUCAUAAUUAUUAUAACGAACACA
MMP1376	1	+	1357606	Primary	23	29	3.07128	22	1.47825	CGAAUAAACUAAUUUAUAUUUUUUAUUUUUGGUGU
MMP1377	1	+	1358708	Primary	25	12	1.44443	0	1	AAUAAUUAUUUAAAACUUUAAUACUUUUUUUCGGC
MMP1378	1	+	1359100	Primary	21	51	1.38346	37	1.32456	AAUAAAUAAAAUAUUAUUUUUUAUUAUUUUAAAAA
MMP1379	1	-	1359048	Primary	46	54	1.45378	12	1.09231	AUUUAUUUCCACUUAAUUGUUUUAAUUUUUCAUUU
MMP1380	1	+	1361103	Primary	179	12	1.70584	4	1.06349	UUGUGGAAUGGACCCAUCAGACAACGGUCUUCCAG
MMP1381	4	+	1362291	Primary	38	189	2.57499	77	1.57037	CAUAUUCUCUUUUUUAAUAUUUUAAAUUUUGAUAA
		+	1362284	Secondary	31	59	1.15775	25	1.10121	UUAUCCCACAUAUUCUCUUUUUUAAUAUUUUAAAUU
		+	1362301	Secondary	48	16	1.35555	1	1.01163	UUUUUUAAUAUUUUAAAUUUUGAUAACCGAUAUAAU
		+	1362316	Secondary	63	7	1.21874	4	1.07273	AAUUUUGAUAACCGAUAUAAUAUUUACUUUUCUAAU
MMP1382	1	+	1363848	Primary	134	22	1.43136	6	1.09524	GGAAUACAGUUUAACCCCUUCAUACCUUUUAAAGG
MMP1383	1	+	1364519	Primary	178	49	1.69999	64	1.8205	AGAAAUUCCUGACGAUGUAGACAUAGUCUUGCUCG
MMP1384	2	+	1365171	Primary	129	44	1.79998	75	1.87208	AAAGCACAAGAUGGAGGUAUCGUUUCUGCCGCAUA
		+	1365116	Secondary	74	13	1.12745	3	1.01724	UUGGAAAAUAUAUAAAAGCAGUUUCCGCAAGGGCUG
MMP1385	5	+	1365954	Primary	30	729	1.68386	242	1.44567	CUUCUUUUAAACUUUUUUUACUAUUUUUUUAAAUA
		+	1365965	Secondary	41	350	1.85784	79	1.37799	ACUUUUUUUACUAUUUUUUUAAAUAAAUUUUCGACA
		+	1365973	Secondary	49	32	1.15385	3	1.01987	UACUAUUUUUUUAAAUAAAUUUUCGACAAUUAUAUU
		+	1365989	Secondary	65	59	1.54128	17	1.20238	AAAUUUUCGACAAUUAUAUUAUAUAGUUUUUUCAUA
		+	1365998	Secondary	74	17	1.80949	0	1	ACAAUUAUAUUAUAUAGUUUUUUCAUAAGUUGUUUU
MMP1387	1	+	1368023	Primary	82	11	1.30555	8	1.11764	GAGUUUAAAUAAUCCUUAAGUUCUUUUUUUAAAUC
MMP1388	1	-	1367960	Primary	27	8	1.47056	4	1.07407	UAAUUUUAGAAACUAUUAAUUUAUUAUUUUAGCUU
MMP1391	2	-	1369825	Primary	23	29	1.61701	72	1.48322	CCUUUAAAAUCUUUUUUCUUUUUAUUUUUCAAAAU
		-	1369818	Secondary	30	11	1.47824	2	1.02273	AAAUCUUUUUUCUUUUUAUUUUUCAAAAUUUAAUCC
MMP1394	1	-	1372920	Primary	53	12	1.99992	5	1.35712	UUUCAAAUCUGCUCCUUUUUUUAAUUUUUCAACAA
MMP1396	2	-	1376029	Primary	25	85	1.89473	47	1.78332	ACUAAUUAAACACUUUUUUCAUAUUUUUUUAAAAU
		-	1376019	Secondary	35	8	1.22856	1	1.02941	ACACUUUUUUCAUAUUUUUUUAAAAUCAGAUUUACU
MMP1399	1	+	1383297	Primary	72	16	1.24242	18	1.13534	AAUGCAGAAAUUGCAGCUAGAGAAAAUGCUACAAA
MMP1401	3	+	1383730	Primary	21	162	1.72	57	1.23361	CUCGUUUAAUUUCACCAAUACUAAUUUUUUAAAUA
		+	1383872	Secondary	163	68	1.544	50	1.24752	UAUUGACUAUAUGGAUGAUAGGGGAUACUCUAUCAA
		+	1383874	Secondary	165	15	1.13636	7	1.03723	UUGACUAUAUGGAUGAUAGGGGAUACUCUAUCAAUG
MMP1402	1	+	1384119	Primary	109	13	1.11712	25	1.11905	AGAACUUUAAGAAUAUCAAGAAAACAUGCUAUUGA
MMP1403	1	+	1384588	Primary	97	15	1.14151	14	1.06364	UUUAAAACUAAAUUAGUUAGAGCAGGAUACAGCCA
MMP1405	4	+	1385373	Primary	10	119	1.26923	82	1.15472	CUCAAGCAGAAAAUGCUUAAGCAUAAUUUUAAAUA
		+	1385380	Secondary	17	77	1.24444	75	1.20833	CAGAAAAUGCUUAAGCAUAAUUUUAAAUACCAUCAA
		+	1385382	Secondary	19	57	1.2395	55	1.18707	GAAAAUGCUUAAGCAUAAUUUUAAAUACCAUCAAUC
		+	1385451	Secondary	88	58	1.27885	12	1.02927	AGUCUAUCAAGAUGAGAGGUGCAUUGAUGCCAGAGA
MMP1406	3	+	1385820	Primary	65	110	1.1532	603	1.13777	UGUACACCCCCAUGCUCAAAGGGUAGGGACACCCA
		+	1385816	Secondary	61	106	1.11181	2233	1.25212	AAAAAUGUACACCCCCAUGCUCAAAGGGUAGGGACA
		+	1385826	Secondary	71	106	1.20907	284	1.16036	ACCCCCAUGCUCAAAGGGUAGGGACACCCAUGAAAU
MMP1407	7	+	1386127	Primary	6	565	1.19707	209	1.06171	AUAAAACAGCUCUACUCGUACUAAGCUUCUCAGCU
		+	1386151	Secondary	30	328	1.18152	225	1.08478	AGCUUCUCAGCUAUUUUAAAUGUCCCAAAUUGAAAA
		+	1386159	Secondary	38	407	1.41829	356	1.16761	AGCUAUUUUAAAUGUCCCAAAUUGAAAAUAAGAAUU
		+	1386230	Secondary	109	162	1.37241	233	1.23417	GUGAAAACAUUAUAUACCUGUAGCCCGUAUUAAAUC
		+	1386244	Secondary	123	43	1.12011	12	1.01335	UACCUGUAGCCCGUAUUAAAUCUGGAACUUUAAAAU
		+	1386256	Secondary	135	35	1.12411	23	1.02706	GUAUUAAAUCUGGAACUUUAAAAUCGACAUUAAACA
		+	1386288	Secondary	167	44	1.26994	203	1.44517	AACACUCUAAAUAAUUAGGAGGUAUGAUUAUGUCAA
MMP1408	3	+	1386696	Primary	80	46	1.29487	191	1.45585	UCAUUACCUAACGGAGCUAGACUCGUCUGUGCAGA
		+	1386659	Secondary	43	26	1.10612	14	1.0198	UGAAUAUUAUGAAAGGACUAGGUUCAAACAUCGUAA
		+	1386698	Secondary	82	17	1.12319	15	1.03866	CAUUACCUAACGGAGCUAGACUCGUCUGUGCAGAUA
MMP1409	1	+	1387141	Primary	106	50	1.32051	91	1.27914	CCAUUACAUUUAAGAAAUAGCGUUAUGUCUGCAAU
MMP1410	2	+	1387427	Primary	13	62	1.34254	155	1.42818	AAAAUUCAAGUAACUAAGAGGUGUGAGCAUGGCAA
		+	1387455	Secondary	41	47	1.33333	16	1.04706	CAUGGCAAUUAAAGGACCUAGAAAACAUCUUAAAAG
MMP1411	1	+	1388265	Primary	105	15	1.12397	18	1.07287	AAUCCAAAAAGUCACCGUAAACUUCGGUGUAGGUG
MMP1412	2	+	1388793	Primary	59	449	3.49443	900	3.17917	GACAAAAUACGGCCAAGGUUCAAAAGUUUGCAAAA
		+	1388863	Secondary	129	43	1.34127	38	1.0852	AUACGGAUUAAAUUUAUGCAGACAAUGCUUCAGAGA
MMP1413	2	+	1389080	Primary	175	167	2.25563	267	1.99256	AUCAAGGAUACAUUGGAAACUUCGAAUACAUUGAA
		+	1388925	Secondary	20	14	1.16092	45	1.13473	AGUACGAUUAAGGACAAGGAGGUAACAAUAUGAGUU
MMP1414	1	+	1389354	Primary	38	14	1.12069	18	1.04826	UGGAGGUAUUCUUAUGCCAGUUGCAGCUUUAAUAA
MMP1417	2	+	1390953	Primary	174	20	1.16	7	1.02251	UAAACAAUGUGACCGCUCAGCUUAUGGCAUACGAU
		+	1390804	Secondary	25	19	1.17592	59	1.22097	GAAUAAUUCAAAUUUAAGGAGGAAUGACUAUGGCAA
MMP1418	2	+	1391447	Primary	63	20	1.19802	0	1	AAGAAAAUUCAAUACCGAAGCUUGGGAGCCAAAAA
		+	1391390	Secondary	6	16	1.15841	5	1.01818	GAAAGAAAAAAUCCUUAACUUAUAAGGUGAUAUAAA
MMP1419	2	+	1392117	Primary	45	137	2.82664	363	2.94117	AAAAGGUGAUUAAAACAUGGCUUACGCAGUUGUAA
		+	1392085	Secondary	13	24	1.11321	35	1.05853	GAAGGAAGAGUACUCUAAUUUAUUACUUUUUAAAAA
MMP1420	1	+	1392629	Primary	61	17	1.16505	5	1.01282	AAAAAUCACGAAAAAAAGAGGCUCCAGAACCUGCG
MMP1421	11	+	1393120	Primary	106	1983	3.43014	3276	2.42126	CAUUUAAAUACUCAUUUUUUAAUAUCUUUUAAUGU
		+	1393063	Secondary	49	592	1.11619	857	1.08909	AUUCCAUUUAAUUCUGCUUUUUCUUAUUUUUGAUAG
		+	1393110	Secondary	96	477	1.11979	636	1.08186	AAGAUCCCAAUCAUUUAAAUACUCAUUUUUUAAUAU
		+	1393127	Secondary	113	158	1.4647	565	1.59915	AAUACUCAUUUUUUAAUAUCUUUUAAUGUUGUGAAA
		+	1393135	Secondary	121	100	1.28818	22	1.04112	UUUUUUAAUAUCUUUUAAUGUUGUGAAACCGAUAUU
		+	1393137	Secondary	123	51	1.17466	-1	0.998124	UUUUAAUAUCUUUUAAUGUUGUGAAACCGAUAUUUA
		+	1393151	Secondary	137	29	1.116	21	1.04366	AAUGUUGUGAAACCGAUAUUUAAUACAUUUUCCAAA
		+	1393178	Secondary	164	33	1.19298	27	1.07181	UUUUCCAAAGAUUAUCACAAUUACACUAUUUGAUAA
		+	1393199	Secondary	185	28	1.26666	44	1.1841	UACACUAUUUGAUAACAAAUUUGUAAAUUUUCUCGU
		+	1393205	Secondary	191	9	1.11842	-1	0.995238	AUUUGAUAACAAAUUUGUAAAUUUUCUCGUUUAUUG
		+	1393209	Secondary	195	15	1.29411	14	1.08536	GAUAACAAAUUUGUAAAUUUUCUCGUUUAUUGAAAU
MMP1422	5	+	1394611	Primary	41	350	1.85574	278	1.35687	UAAUUAGAAAUAAAAAUUUUUUACUUUUUUAAAAA
		+	1394621	Secondary	51	45	1.26163	47	1.10284	AUAAAAAUUUUUUACUUUUUUAAAAAAUAUUAAACC
		+	1394657	Secondary	87	13	1.11111	4	1.00879	CGAAGUAUUUUGUAUAUAAAAUACUCAAAAUUCCAA
		+	1394659	Secondary	89	26	1.30232	20	1.04695	AAGUAUUUUGUAUAUAAAAUACUCAAAAUUCCAAAA
		+	1394708	Secondary	138	9	1.2093	3	1.00711	CCCAUAACACAAGUACUAUUUUAUAUUCUUCCAUUG
MMP1424	5	+	1398227	Primary	63	183	2.21191	81	1.42857	UUUUAAAUAUUAACUUUUUUAAUAUUUUUUGAAAA
		+	1398224	Secondary	60	50	1.13158	18	1.06061	UUAAUUUUAAAUAUUAACUUUUUUAAUAUUUUUUGA
		+	1398236	Secondary	72	22	1.45832	1	1.00826	AUUAACUUUUUUAAUAUUUUUUGAAAACUUUUAAUU
		+	1398304	Secondary	140	6	1.19999	3	1.02857	UUUAUGGCUAUUGAGAUAUUGAGGUUGGGCCAUCGA
		+	1398306	Secondary	142	17	2.30759	26	1.34666	UAUGGCUAUUGAGAUAUUGAGGUUGGGCCAUCGAGG
MMP1425	1	+	1398847	Primary	31	6	1.33332	1	1.01493	CUAAAUCUCUCUGGUGAAAUAGAUGAUAUUAAGUG
MMP1427	1	+	1400897	Primary	57	25	1.33333	46	1.1614	GUUUAUAAACUUUUAAAACAUAUACUUUUUAGAUA
MMP1428	2	+	1401108	Primary	34	146	1.32517	125	1.13089	AAAAAUAAAAUAAGUUUUUUUUGAAUUUUUAAUAU
		+	1401119	Secondary	45	46	1.14743	8	1.00943	UAAGUUUUUUUUGAAUUUUUAAUAUUAAUUUAAAUC
MMP1429	1	-	1401077	Primary	52	147	1.39305	105	1.12915	AAAUUCAAAAAAAACUUAUUUUAUUUUUUUAAUUA
MMP1432	5	-	1403932	Primary	67	161	2.96339	425	1.85	UUAUAUAUUAUUAUCCAAGUUUUAUUUUUUAGAUU
		-	1403918	Secondary	81	7	1.31817	3	1.00796	UCCAAGUUUUAUUUUUUAGAUUGGUAGGGAUAUGAU
		-	1403920	Secondary	79	10	1.29411	-4	0.989501	UAUCCAAGUUUUAUUUUUUAGAUUGGUAGGGAUAUG
		-	1403960	Secondary	39	66	1.17277	207	1.13618	AUUUUAAUUAACUACUUUUUUUAUGAUUAUUAUAUA
		-	1403969	Secondary	30	83	1.1381	678	1.25672	AUUAUAAAAAUUUUAAUUAACUACUUUUUUUAUGAU
MMP1433	4	-	1405100	Primary	25	713	2.78696	559	1.60761	ACUAAUUGAAUUUCACAUUCUUUUUUUUCUGGAAA
		-	1405071	Secondary	54	32	1.34782	6	1.01389	CUGGAAAUUCGUAUUUAUUAAUUCAAAUAUUUAUUG
		-	1405089	Secondary	36	24	1.15484	2	1.00443	UUUCACAUUCUUUUUUUUCUGGAAAUUCGUAUUUAU
		-	1405092	Secondary	33	57	1.24569	88	1.18526	GAAUUUCACAUUCUUUUUUUUCUGGAAAUUCGUAUU
MMP1435	4	-	1406214	Primary	80	107	1.3474	48	1.11009	UAUAAAUCGAUAAUUCUUUUCAAUUAUUUUGAGAU
		-	1406168	Secondary	126	19	2.46143	31	1.1962	AAUUAUUUAUUUUCAAAUUUUAUUCCAUUUUGGUGA
		-	1406179	Secondary	115	40	1.39604	28	1.112	UCUAUUUUUAAAAUUAUUUAUUUUCAAAUUUUAUUC
		-	1406186	Secondary	108	32	1.20645	28	1.09396	UUUGAGAUCUAUUUUUAAAAUUAUUUAUUUUCAAAU
MMP1436	2	-	1406555	Primary	9	34	1.50745	28	1.20895	AUAGAUAUCCCAAAAAUUUAAUUAAUUUUUAAGAU
		-	1406504	Secondary	60	8	1.16326	-1	0.992701	UAUGGCAAAAGAAAAAAUCGCAAAUAGUGACGUGCA
MMP1437	2	+	1409048	Primary	75	59	2.17998	37	1.30081	CCAAUAUCCUAAAACUAUUUUUCUUUUAUUACGAU
		+	1409045	Secondary	72	29	1.19728	16	1.08696	AAAACCAAUAUCCUAAAACUAUUUUUCUUUUAUUAC
MMP1438	1	+	1410360	Primary	33	48	1.78687	134	1.26482	ACCUACAAAUCUAUCUUUUUUUAUUUUUUUCAACC
MMP1439	2	+	1411745	Primary	46	34	1.75554	20	1.34482	UAUUUUUGGAUUAAUUUUUCUAUUUUUAUUAGUAA
		+	1411752	Secondary	53	9	1.2647	0	1	UGGAUUAAUUUUUCUAUUUUUAUUAGUAAGUAAAAC
MMP1441	4	+	1413451	Primary	12	72	1.69902	44	1.15827	AAAAUUGAAAAAAAAUAACUCUUAUUUUUUGAAUA
		+	1413455	Secondary	16	8	1.10526	0	1	AUUGAAAAAAAAUAACUCUUAUUUUUUGAAUAAAGA
		+	1413465	Secondary	26	7	1.11475	3	1.01255	AAUAACUCUUAUUUUUUGAAUAAAGACCCAUACCGU
		+	1413477	Secondary	38	15	1.34883	88	1.68216	UUUUUGAAUAAAGACCCAUACCGUGCAUUAUGGACU
MMP1442	4	+	1413974	Primary	137	206	2.22618	179	1.67293	AAAUAAAACACAAUUUUCUUUUUUAAUUUUGUAAU
		+	1413968	Secondary	131	91	1.20682	40	1.07767	UGAAAACAAAUAAAACACAAUUUUCUUUUUUAAUUU
		+	1413988	Secondary	151	13	1.3421	-1	0.992126	UUUUCUUUUUUAAUUUUGUAAUUAAAACAUUUUUCA
		+	1413991	Secondary	154	8	1.39998	10	1.09709	UCUUUUUUAAUUUUGUAAUUAAAACAUUUUUCAUCG
MMP1445	4	+	1416664	Primary	35	56	1.48275	40	1.14493	UUAAUUAAAUAAAAAAAGUUUUAUUUUUUUAAAAU
		+	1416673	Secondary	44	16	1.17977	12	1.048	AUAAAAAAAGUUUUAUUUUUUUAAAAUUAUUUAUCC
		+	1416692	Secondary	63	7	1.10294	3	1.0121	UUUAAAAUUAUUUAUCCACAAUUAUAGUAUUGUCGC
		+	1416749	Secondary	120	8	1.13115	2	1.00511	CUGUUAAAAGCUCUUCUUUUACCCCAUCUCCAAUUA
MMP1447	1	+	1418100	Primary	36	6	1.15	4	1.07547	UGGUUUUAUUAAUUAACUACGCAGUAUCUUUGGUU
MMP1452	1	+	1419721	Primary	93	16	1.43242	14	1.17721	UGCAGGGUUUGUCUGCAUAGUUUUAUUCAUCGGUA
MMP1453	2	+	1420184	Primary	81	11	1.33332	9	1.08411	UUGGAAUAAUUUCACUUUAUUCAAUUUCCCGCCAA
		+	1420255	Secondary	152	8	1.44442	19	1.43181	UAUAGAAUAUGGAAUGCUCGUAAUUAUUGCGGCAAU
MMP1455	1	+	1421535	Primary	62	7	1.19444	0	1	CUAUAUAGCACUUAUAAUUGGAAUCUUGGGAUACC
MMP1456	2	+	1421853	Primary	161	7	1.30434	-1	0.979592	UUCAGUAUUUAAUCCAUACAUUCAAAUUUUACUUU
		+	1421713	Secondary	21	6	1.18749	6	1.12245	AGGGUGGUAAUUUGAACGCAGCAUUUAGUAUGUUUA
MMP1461	2	+	1424071	Primary	16	6	1.26086	18	1.37499	AAGUCAAAGCAUGAUUUGAGAUGAUAUUAUGAAUG
		+	1424199	Secondary	144	6	1.16216	7	1.15217	GACAUGGGUUACGUUCACAGGGGUAUUGAACGUAUC
MMP1467	4	+	1428764	Primary	28	214	2.4861	122	1.55963	AAAAUAGAAAAAAUAUUAAAUUUCUUUUUUGGACA
		+	1428773	Secondary	37	18	1.17308	3	1.01657	AAAAAUAUUAAAUUUCUUUUUUGGACAUGAUUUUUA
		+	1428829	Secondary	93	18	1.30508	17	1.14166	CCCAUUAUUUUACUGAUCUCUGAAAUAUUUUCAACG
		+	1428868	Secondary	132	12	1.42856	7	1.08434	UCUUUAAAAUUUUUGCCUACAAUCCCAUUUUCAUAA
MMP1469	4	-	1429959	Primary	36	27	1.40298	6	1.07895	UUUUUUAAAAUAUUAUUUUUAUUUUUUUCUAAAGA
		-	1429939	Secondary	56	9	2.28553	15	1.37499	UAUUUUUUUCUAAAGAUUUAGUUGAUAUUAUGGAUG
		-	1429951	Secondary	44	10	1.35713	8	1.12698	AAAUAUUAUUUUUAUUUUUUUCUAAAGAUUUAGUUG
		-	1429953	Secondary	42	7	1.175	1	1.01389	UAAAAUAUUAUUUUUAUUUUUUUCUAAAGAUUUAGU
MMP1470	5	+	1430972	Primary	49	194	2.57722	91	1.23333	UUUAAAUUAAAUUUUAAAAAUACACAUUUUAAACA
		+	1430945	Secondary	22	65	1.1272	32	1.05694	ACAAACUAAUUUUGACUAAUUUUUAACUUUUAAAUU
		+	1430957	Secondary	34	50	1.11737	25	1.04699	UGACUAAUUUUUAACUUUUAAAUUAAAUUUUAAAAA
		+	1430980	Secondary	57	16	1.20779	4	1.01231	UAAAUUUUAAAAAUACACAUUUUAAACAAUCUAUUC
		+	1430984	Secondary	61	7	1.14285	14	1.04698	UUUUAAAAAUACACAUUUUAAACAAUCUAUUCAAAA
MMP1472	1	+	1433053	Primary	86	7	1.30434	1	1.01163	UGGUACUCUUGAUUAUUAGAGGCGACAGCUACGAA
MMP1474	3	+	1436573	Primary	26	36	1.17308	11	1.07692	AUAAAAUAAAAAAAUCUUUUUUUAUAUUUUUAUUA
		+	1436577	Secondary	30	32	1.24427	15	1.13889	AAAUAAAAAAAUCUUUUUUUAUAUUUUUAUUAUCAA
		+	1436674	Secondary	127	11	1.14285	8	1.08889	UUCUAUAUUUUGAACUUCAUUGAUAUUUUUUAAACU
MMP1475	1	-	1436534	Primary	50	31	1.34444	13	1.11403	AAAAGAUUUUUUUAUUUUAUUUAUUUUUUUCAAUG
MMP1479	3	+	1440709	Primary	47	16	1.38094	7	1.08536	UAAAAUUUAAUUUAAAUCCCUCAUAUUUAUAAAUC
		+	1440707	Secondary	45	11	1.18033	0	1	UUUUAAAAUUUAAUUUAAAUCCCUCAUAUUUAUAAA
		+	1440731	Secondary	69	6	1.42854	8	1.18181	CAUAUUUAUAAAUCAAUAACACCUAACCUAUGAAGU
MMP1480	2	+	1442057	Primary	25	86	2.22855	96	1.65753	AAUAAUAAUCAAUAUUUGUUUCUCUUUUUUAAAAU
		+	1442063	Secondary	31	7	1.31817	1	1.01389	UAAUCAAUAUUUGUUUCUCUUUUUUAAAAUUAGUUU
MMP1481	2	+	1443015	Primary	133	27	1.55101	20	1.25316	UGCAGAUGGUGCUGCUGGAGACUUGAUCAUGGAAA
		+	1442904	Secondary	22	10	1.14925	17	1.1954	GCUGAAUAAUGGAAUUUAAACACGUCUUGAUGAUUC
MMP1482	4	+	1443301	Primary	123	32	1.13974	21	1.09545	CAAUUUCUUCACUGUUCGUUAGCAUUUUUUCUAAA
		+	1443304	Secondary	126	21	1.10995	0	1	AUUUCUUCACUGUUCGUUAGCAUUUUUUCUAAAAAU
		+	1443312	Secondary	134	25	1.19685	23	1.14375	ACUGUUCGUUAGCAUUUUUUCUAAAAAUUUUAUUGU
		+	1443326	Secondary	148	29	1.36708	21	1.17213	UUUUUUCUAAAAAUUUUAUUGUACCUCUUUUAAUCA
MMP1483	1	+	1443998	Primary	35	11	1.43998	2	1.05263	AAAAUUAAAUUCUAACUUUUUUAUACCUUUAAGCA
MMP1485	2	+	1445442	Primary	91	17	1.10692	5	1.02273	GAAUUUCAAUACCUUCUUUUCCGUAUUUUUCGUAG
		+	1445548	Secondary	197	6	1.10345	-2	0.984127	CUACGGAAGACUCACCAAGACCGGUUACAACCACUG
MMP1486	2	-	1445345	Primary	30	66	1.61682	63	1.32984	AAAAUAGUUUUUAUAACUUUUUUUUAUUUUAUAUG
		-	1445334	Secondary	41	11	1.2	-1	0.991803	UUAUAACUUUUUUUUAUUUUAUAUGGCCGAUAAUAU
MMP1488	1	+	1449249	Primary	126	9	1.17307	2	1.04	GCAUUAUUAAUUCUCAUAAUUUUAGCAUUUAAAAU
MMP1489	2	-	1449283	Primary	43	26	1.49056	4	1.07692	GUUCUUUUUUAAUUUUCUUUAUUUUUUUCUAAAAA
		-	1449273	Secondary	53	6	1.18749	1	1.03125	UAAUUUUCUUUAUUUUUUUCUAAAAACAAGAUUUUU
MMP1491	1	-	1451835	Primary	53	13	1.30952	5	1.05682	AUAAUCUAAAAAAUCUUUUUCAAUUUUUUCAAAAU
MMP1493	4	+	1455271	Primary	63	202	2.00999	85	1.36481	UUUGAAUAUUAUUUUAUUUUCCUUUCUUUUGUAUA
		+	1455280	Secondary	72	43	2.04875	15	1.15625	UUAUUUUAUUUUCCUUUCUUUUGUAUAAUUUAAAAA
		+	1455287	Secondary	79	13	1.68417	0	1	AUUUUCCUUUCUUUUGUAUAAUUUAAAAAGAAAGAA
		+	1455296	Secondary	88	6	1.74991	6	1.07792	UCUUUUGUAUAAUUUAAAAAGAAAGAAAUUUUGGUG
MMP1494	1	+	1455939	Primary	29	29	1.53703	40	1.61538	AUUUAGAUUAAUUUUUAUUUUUUAUAUUUUGAGCC
MMP1495	1	-	1455868	Primary	56	9	1.16666	3	1.02586	AGUGUUUUUCUAAUAUCUUUUUCAAUUUUUGACAU
MMP1498	1	+	1459814	Primary	27	80	1.58823	27	1.10425	UAAACUCUUUUUUUAAACUCUUAAAUUUUUGACAC
MMP1499	1	-	1459746	Primary	59	26	1.19697	66	1.28448	AACAAAGGAAUCUACUCUUGAAAUAUUUUUAGAGA
MMP1500	4	-	1460329	Primary	37	288	2.34579	97	1.39431	AUUCUAACGAUUUUUCUUUUUUUAUAUUUUAGGUG
		-	1460316	Secondary	50	17	1.4857	4	1.02941	UUUCUUUUUUUAUAUUUUAGGUGGGACCUAUGCGAG
		-	1460318	Secondary	48	17	1.30357	6	1.04138	UUUUUCUUUUUUUAUAUUUUAGGUGGGACCUAUGCG
		-	1460325	Secondary	41	23	1.28395	-5	0.975962	CUAACGAUUUUUCUUUUUUUAUAUUUUAGGUGGGAC
MMP1502	6	-	1462514	Primary	21	204	1.3	24	1.04898	AGAAAAUAAAUUUAUUCUUUUUUAUUUUAUGGAAA
		-	1462398	Secondary	137	9	1.37498	4	1.04211	CCCGGAUUUAAAAGUAAUAUUUUUUUAUUUUCAAGG
		-	1462456	Secondary	79	47	1.78332	16	1.10457	UUCUUCUAUUUUUAAUUUCAUAAUCGUUUUUAAAGG
		-	1462468	Secondary	67	42	1.18341	23	1.09127	AUCAAUUUCUCUUUCUUCUAUUUUUAAUUUCAUAAU
		-	1462474	Secondary	61	151	1.41713	84	1.23333	CUCUGCAUCAAUUUCUCUUUCUUCUAUUUUUAAUUU
		-	1462516	Secondary	19	141	1.14827	15	1.02868	UCAAGAAAAUAAAUUUAUUCUUUUUUAUUUUAUGGA
MMP1504	1	-	1463485	Primary	12	12	1.38708	2	1.03333	GACGAAUACGGUCUUUAAUUAAUAUUUUUUAAGGU
MMP1505	1	-	1464250	Primary	160	16	1.28571	13	1.2653	ACGAUCGUUGCAAAUGCUACAGGAUGUCUUGAAGU
MMP1506	1	-	1465497	Primary	98	9	1.23076	0	1	UGCAAAGCUUGCAGAUGUAGAUGUUAUUGCAGCAU
MMP1508	2	+	1467116	Primary	146	11	1.1746	25	1.10549	AAACUAUUAAACAAAGGAAGCUUAGAUUACGUCGA
		+	1467128	Secondary	158	10	1.20833	22	1.10891	CAAAGGAAGCUUAGAUUACGUCGAUAUUGACGUUGG
MMP1509	5	+	1467356	Primary	24	688	2.06337	363	1.22802	AUCUAAAUUUUUCUCUUUUUUUAACUUUUAAACGA
		+	1467362	Secondary	30	68	1.1475	11	1.00793	AAUUUUUCUCUUUUUUUAACUUUUAAACGAAUUUUA
		+	1467388	Secondary	56	111	1.83458	254	1.37026	ACGAAUUUUAUAUUGUAAAUUUAAUUUUUUUAGAUA
		+	1467392	Secondary	60	12	1.10811	0	1	AUUUUAUAUUGUAAAUUUAAUUUUUUUAGAUAAAAU
		+	1467400	Secondary	68	19	1.19388	21	1.04459	UUGUAAAUUUAAUUUUUUUAGAUAAAAUUAUCUUUG
MMP1510	1	-	1467414	Primary	51	91	1.69465	42	1.08317	UAUAAAUUUCUAGACUAUUUUUUACUUUUUUAAAU
MMP1511	4	-	1468879	Primary	59	258	3.24346	87	2.19176	AUCCAAUACUUUUUUGUUUAUUAUAUUUUUAAAAA
		-	1468868	Secondary	70	14	1.69996	0	1	UUUUUGUUUAUUAUAUUUUUAAAAAUUAAGUCAAAC
		-	1468872	Secondary	66	27	1.64284	9	1.52938	UACUUUUUUGUUUAUUAUAUUUUUAAAAAUUAAGUC
		-	1468876	Secondary	62	17	1.23611	10	1.17544	CCAAUACUUUUUUGUUUAUUAUAUUUUUAAAAAUUA
MMP1512	1	-	1470511	Primary	11	12	1.99992	4	1.57135	AAGAAUAUAUUUACAUUAAUUCUUUUUUUUAGCCU
MMP1515	4	-	1474526	Primary	27	960	3.05567	1827	2.51744	UAAUUUUCAUUCCCUUCUUUUUUUAUUUUUAUAAA
		-	1474396	Secondary	157	10	1.32257	16	1.13559	UAAUUUUAUUGAAUGUUUCUUCCAAUUUUUUCAAAU
		-	1474516	Secondary	37	68	1.70833	2	1.01399	UUCCCUUCUUUUUUUAUUUUUAUAAAACAAUAUUUA
		-	1474529	Secondary	24	362	1.219	287	1.08343	GAUGUAAUUUUCAUUCCCUUCUUUUUUUAUUUUUAU
MMP1516	3	-	1476293	Primary	75	21	1.61763	11	1.18033	AUUAAUUUCAAUGAAUAACUCUUUUUUUUUAGAAC
		-	1476286	Secondary	82	7	1.63631	8	1.24242	UUCAAUGAAUAACUCUUUUUUUUUAGAACUUAACAA
		-	1476315	Secondary	53	8	1.11594	0	1	UAUGAUAUUUUUUAUUUAUAUUUAUUAAUUUCAAUG
MMP1517	1	-	1476891	Primary	164	21	2.1666	39	1.59999	ACUUCGAAAAUUUGACAUACGGCUGUCUGCAGACG
MMP1518	2	-	1477763	Primary	27	11	1.24999	7	1.175	UAAUUUACCAAUAUUUUUUUUUAUUUUUUUAAUGA
		-	1477753	Secondary	37	7	1.3684	4	1.22221	AAUAUUUUUUUUUAUUUUUUUAAUGAUUAUUUGAAU
MMP1520	2	+	1480379	Primary	28	38	1.31147	29	1.27884	AAUUAUAUAAACAUUGAUUUUAUUUUUUUUAAAUU
		+	1480405	Secondary	54	8	1.10526	2	1.02299	UUUUUAAAUUGCCAUUACUUCGACAAAUUUUGGAUC
MMP1523	3	-	1481839	Primary	42	167	2.05031	216	1.75524	AAAUAAAAUAAUUUACCUACUUUAUUUUUUGGGGA
		-	1481763	Secondary	118	10	1.27777	10	1.15625	GUUGUAUAUGGACUUGGUAUUUCCAUAAUUUCAUUU
		-	1481830	Secondary	51	10	1.20408	7	1.06542	UAAUUUACCUACUUUAUUUUUUGGGGAUCAAAUGGA
MMP1525	1	+	1485319	Primary	39	29	1.7073	9	1.35999	AAUAAUUAACUAUUUUUUUAAUUUAUUUUUGCAGA
MMP1527	3	-	1485997	Primary	67	40	2.17644	45	1.41284	UUAAUUUAAUUUUUAUUUUUUUCAAGUUUUAAAAG
		-	1486004	Secondary	60	36	1.35294	22	1.13018	AAUCUAAAUUAAUUUAAUUUUUAUUUUUUUCAAGUU
		-	1486040	Secondary	24	28	1.12069	11	1.05069	CGAAUAAAUUUUAAACUUUUUUUAAAUUUUUAAUUU
MMP1530	3	-	1488856	Primary	79	18	1.34615	15	1.29411	UUCAAAGUAUCCUGAUUACUUAAAACUUUUAAUGG
		-	1488793	Secondary	142	6	1.22221	4	1.0851	UAAUUUUAGAAGAUGACUUUUUUAAAUCUUUAUCCA
		-	1488828	Secondary	107	6	1.15789	0	1	UUUAAUGGAGUUUGAAGAAAAUCUUAUUUUUAAGAU
MMP1532	1	-	1490236	Primary	118	8	1.33332	0	1	CUUACUAUUUUAUUAUUAAAAUAGUUUUUUCGGAC
MMP1534	3	+	1492989	Primary	17	127	2.17591	97	1.43303	UCUUAUUGAAUAACUCUUUUUUAAAUUUUUAAAAA
		+	1492996	Secondary	24	19	1.52776	4	1.03008	UGAAUAACUCUUUUUUAAAUUUUUAAAAAAUAAAGA
		+	1493037	Secondary	65	6	2.19976	13	1.23214	UGGGAAUAUUAACACACCCAUCAUGUUUGAUAAAUU
MMP1537	1	+	1495457	Primary	6	15	15001	7	4.49825	GAAGUAUAUCUAAAAAAGGCAUAAUUAAGGAAAAA
MMP1538	4	+	1495978	Primary	33	391	5.20426	95	2.55735	CUAAAUAUAAUUAAUUUCUACUAUUUUUUUGAAAA
		+	1495984	Secondary	39	7	1.12727	13	1.44826	UAUAAUUAAUUUCUACUAUUUUUUUGAAAAAUUAGC
		+	1495987	Secondary	42	8	1.19999	1	1.04348	AAUUAAUUUCUACUAUUUUUUUGAAAAAUUAGCUCA
		+	1495990	Secondary	45	22	3.19978	3	1.23075	UAAUUUCUACUAUUUUUUUGAAAAAUUAGCUCAACU
MMP1540	1	+	1497424	Primary	39	18	1.15517	5	1.04545	AAAAAAUAAAAAAAAAUUAAAUUUGUUUUUCUGCA
MMP1541	2	-	1497384	Primary	27	93	2.57624	78	1.92856	UAAUUUUUUUUUAUUUUUUUUUAAUUUAUUAUAGA
		-	1497373	Secondary	38	6	1.20689	1	1.025	UUAUUUUUUUUUAAUUUAUUAUAGAUCAAAUUCUUU
MMP1543	2	+	1499904	Primary	24	15	1.10345	10	1.03333	AACUAAUUACUCAAAAACACGAGCAGGUGUUAAAU
		+	1500029	Secondary	149	12	1.10619	5	1.01608	UAAUUAAAAGGGCAGUAAUCUCAUCAUUAACCGCAA
MMP1546	2	+	1501856	Primary	142	336	1.78688	545	1.81955	AAGAAGAAGAGUAGAAUUUAAAUACAAAGGCUUCA
		+	1501889	Secondary	175	115	1.4291	45	1.06747	UCAGUUUGGAAGAACUUCAAGAGAUGCCUAUCAAAA
MMP1547	3	+	1502265	Primary	27	1099	2.12718	873	1.29533	UAAUUGGAAUCCAAAAUCUCUUUUUUUAUUUUUGG
		+	1502268	Secondary	30	485	2.37005	1239	1.91237	AUUGGAAUCCAAAAUCUCUUUUUUUAUUUUUGGAAA
		+	1502276	Secondary	38	169	2.59432	58	1.72499	CCAAAAUCUCUUUUUUUAUUUUUGGAAAAAUUAAUU
MMP1550	3	+	1504497	Primary	23	75	1.60483	35	1.35353	CCUUUAAUAUCGAAUUACCAUUCCUUUUUUCCAAA
		+	1504503	Secondary	29	6	1.11321	4	1.05714	AAUAUCGAAUUACCAUUCCUUUUUUCCAAAAAAUAA
		+	1504506	Secondary	32	8	1.18604	0	1	AUCGAAUUACCAUUCCUUUUUUCCAAAAAAUAAUCG
MMP1551	2	-	1504805	Primary	26	70	1.83332	74	1.55224	UUAACUUAAAAAACAAUUAUUACUUUUUUUAGUGU
		-	1504794	Secondary	37	14	1.46665	3	1.03488	AAACAAUUAUUACUUUUUUUAGUGUCAUUUUCACGA
MMP1553	2	-	1506932	Primary	31	71	1.67618	26	1.1097	AUGAAUUAAAUCCAUAAUUAAUAUUUUUUUGAAGA
		-	1506870	Secondary	93	29	2.11534	61	1.47656	AAACCUAAAUUUCAAAAAUCUCUAUUUUUUUAAAUG
MMP1554	2	-	1508110	Primary	17	24	2.59989	43	1.71666	AAAUCCUAUUUAAUUUUUUAAUUUUUUUAUAAUCA
		-	1508113	Secondary	14	23	1.35384	23	1.14197	UUGGAAAUCCUAUUUAAUUUUUUAAUUUUUUUAUAA
MMP1555	1	+	1511089	Primary	61	14	1.17284	8	1.04598	CCCACAUAGGUAUUUAAAAGCAGAAACUACCGAAA
MMP1558	1	+	1513045	Primary	129	25	1.23148	8	1.04372	AAGACCCUAAAGAAAAGUACACAAAAUUCUAUACC
MMP1559	5	+	1514668	Primary	43	1501	1.52082	1157	1.27424	AGGGAGCCACUUGGCUUCCUUUUUUUAUACUUAUU
		+	1514675	Secondary	50	336	1.65882	182	1.20358	CCACUUGGCUUCCUUUUUUUAUACUUAUUAUAUAUU
		+	1514680	Secondary	55	148	1.64348	181	1.74485	UGGCUUCCUUUUUUUAUACUUAUUAUAUAUUGUUUC
		+	1514683	Secondary	58	51	1.3669	11	1.05288	CUUCCUUUUUUUAUACUUAUUAUAUAUUGUUUCAUA
		+	1514822	Secondary	197	66	1.98506	89	1.59333	AACAAGAUAAUAACUGAAUAGCUAACGGCAUAGAUA
MMP1561	1	+	1516691	Primary	165	11	1.19643	2	1.02	ACAAUUUGUUCCGUCAUUAGCUAUGCUCAUUGGUG
[truncated: 363 more rows]
