# Supplementary material for: aCPSF1 cooperates with terminator U-tract to dictate archaeal transcription termination efficacy
Source: eLife. 2021 Dec 29;10:e70464. doi: 10.7554/eLife.70464 (PMC8716108; doi:10.7554/eLife.70464)
Supplement: Supplementary file 2. [file elife-70464-supp2.xlsx]

## Sheet: Sheet2
Datasheet S2. Transcription termination efficiencies (TTEs) of primary TTSs in the wild type S2 and ▽aCPSF1 mutant, and the TTS Quadruplet Read Ratio (TQRR) and the U4-tract numbers in terminators.
Position: the nuclotide of Term-seq identified TTS;
Upstream gene: gene upstream of the identified TTS;
S2_TTE and ▽aCPSF1_TTE: calculated transcription termination efficiency (TTE) of a gene in the wild type strains S2 and ▽aCPSF1 mutant, respectively;
TQRR: the TTS Quadruplet Read Ratio (TQRR) of a gene in strain S2 to that in ▽aCPSF1 mutant;
Number of U4 tract: number of the four consecutive uridine in the terminator
Sequence -30 to +5: sequence of the RNA fragment from 30 nt upstream to 5 nt downstream of the identified TTS
Position	Upstream gene	S2_TTE	▽aCPSF1_TTE	TQRR	Number of U4 tract	Sequence -30 to +5
10581	MMP0001	0.181813	0.065789	0.875806	0	CUAAAAUUAAUAGAAACAUAUGUUGGGCCAGCAAUA
11518	MMP0002	0.218637	0.0326977	0.807775	2	AAAAAAUAAAAUAACUUUUUUCAAAUUUUUUAAAUU
11474	MMP0003	0.257776	0.151202	0.874441	3	AAGUUAUUUUAUUUUUUUAUUACUUUAUUUUAAAGA
16447	MMP0006	0.536943	0.0322578	0.478492	3	AAUAAUUUUUAUUUUUACUUUUUUUAAUUUAAAAAA
17620	MMP0007	0.509088	0.445342	0.885073	1	AUAAAAUAAAAAUUAAUUUAUUUCGAUUUUUCCCUG
17565	MMP0008	0.119999	-0.0284088	0.855692	6	UUUUAUUUUAUUUUAUUUUAUUUUAUUUUUUAGACA
20408	MMP0010	0.785686	0.566657	0.494559	0	GAUUGACGAAAUAAAUGAUAGUUCAAACCUUAAAUU
24148	MMP0013	0.485071	0.277308	0.712516	2	ACUAAAUUCCAAAUCUAUUUUGUACUUUUUUGAGUU
24041	MMP0014	0.128712	0.0392154	0.906851	3	AUAUUUUAUAAUUUUUUUAAUUUUUUAUUCUAAGAG
26617	MMP0017	0.499986	0.0882326	0.548401	1	AUUUAACACAAUAAUUUAAUCUGACUUUUUUAUAAU
28933	MMP0020	0.804069	0.60923	0.501396	2	ACUUUGAAUCUUUAUUGUUUUUAUUAUUUUUUAAUU
30431	MMP0021	0.0985899	0.0312499	0.930488	1	AAAUAAUAAAUUAAUUGAAUUUAAUUUUUUUCCCGA
30398	MMP0022	0.244678	0.0833324	0.823987	1	AAAAUUAAAUUCAAUUAAUUUAUUAUUUUUUACAGA
32880	MMP0024	0.158536	-0.817917	0.462873	2	UUUAUAUGGAUAAAUUCUUUUUUAAAUUUUUAAAAA
32881	MMP0025	0.532908	0.475063	0.889806	2	UUAUUCACUAUUUUUUUACACUUUAUUUUUUAAAAA
42158	MMP0027	0.75997	0.634603	0.656903	3	UGGUUUAAUUAUUUUCAAAUUAAUUUUUUUUAUAUA
44756	MMP0028	0.0974021	-0.00729889	0.896058	2	AAUUUUAAAAAAGAAAAUAUGUUAUUUUUUUAAUUA
44724	MMP0029	0.641301	0.388886	0.586959	3	AAAAAUAACAUAUUUUCUUUUUUAAAAUUUUAAAAA
47803	MMP0030	0.537027	0.0634907	0.49436	1	AUUGUAAAAUAAUUAAUGAUAUUCCAAUUUUAAGAG
48880	MMP0031	0.419341	0.0291262	0.598078	1	UUAAUAGAUUACUACACUAUUUUUUAUUUAUCAGUU
51888	MMP0033	0.144443	0.0313729	0.883268	0	UAAAAAGAAAAAAUAAAAGAGACAUCGUUCUUCUCC
52730	MMP0034	0.707788	0.180592	0.356614	2	ACUUUAACAAAUUAAUUUUAAUUUAUUUUUUAGUGG
54470	MMP0036	0.818171	0.441858	0.325775	2	UACCUAAUUUUAAUGAAUAUUUAACUUUUUUAACAG
55060	MMP0037	0.134327	0.00714262	0.871901	0	AAAGUCAUACAUACUGCACACGUAAUUAUCAUUCUA
54872	MMP0038	0.396944	0.0517237	0.63595	1	UUAUUUGAAACUUCAUUAUUUGUUCUUUUUUUAAAU
55782	MMP0039	0.333321	0.283947	0.931047	0	GAUAUUAAAAAAAACAGGUAGAAAACUUGAUGAACG
56837	MMP0040	0.632344	0.504583	0.742114	0	AAACUCCGAAAAAAAGAAAAAUAUCUAGGGUUGGAA
58555	MMP0041	0.319987	0.0677955	0.729467	0	UUGACAGAAUCCAAAGCAGAGAUUCCAAUCCAUCUG
59583	MMP0042	0.322577	0.351757	1.04501	0	AUCUGUUACAAAAGAAGAUACUAAAAAGUCUGAAAG
63070	MMP0044	0.256753	0.150683	0.875111	1	AAAGAGUAAGACCUUAUCUUUCAAUUUUAACAUAUC
63912	MMP0045	0.587529	0.290501	0.581356	2	UUACAUUUAACUAGCUAUUUUAACUUUUUUUAAAAU
64455	MMP0046	0.457361	0.184289	0.665235	2	ACCAGUAAUCUGUCCUUUUUUUGCCAUUUUUCCUAA
66812	MMP0050	0.678893	0.212961	0.407994	1	UAAUUUAAAAUUAAAUUUAUAAAUCUUUUUUAGUGA
67141	MMP0051	0.620595	0.47826	0.727192	3	AACUUAUUUUAAAUACUUUUUUAGAAUUUUUGGAAA
68136	MMP0053	0.297869	0.0666653	0.752282	2	UAGAUUUUUAAAUAUAUUUAAGCUCUUUUUUGCAGA
70072	MMP0056	0.28235	0.217382	0.916986	1	AAUAAAAUAGAUUUCCCCAAUUUACGUUUUUUAACC
71276	MMP0057	0.582414	0.274998	0.575978	2	UAAUUGAAUAAAUCCUAAUUUUUAAUUUUUUAAUGA
73588	MMP0058	0.565824	0.414626	0.741707	2	CCAAUAAUUAAAUAACUUUUUUAAAUUUUUUAAAUU
73596	MMP0059	0.23867	-0.0283844	0.740316	2	CUUUAAAACUAAAAUAAAACUCUUUUUUUUUGAAAU
74134	MMP0060	0.702265	0.528675	0.631698	3	ACUAAUUAUUUUACUCUUUUUAAAUUGUUUUGAUUU
75110	MMP0062	0.50997	0.304189	0.704257	0	UUAGUAGAAUAAUCUACCUGCUUCUUUCUUUAGAAA
76379	MMP0063	0.300904	0.0945269	0.772078	2	UAAGAGAAUAACUUUCUUUUUUUAAUUUUUCAAACU
78406	MMP0065	0.820844	0.567302	0.414044	2	ACUAUUAUAUAUUUUUCAGAAUAUAUUUUUUCAAAA
78822	MMP0066	0.618924	0.417547	0.65426	2	AAAUAUUUUUUUAUUCUUUUUUUCAAAUAUUCAAAU
80648	MMP0068	0.827558	0.365587	0.271814	3	AUUUUUAUAUUUUAAAAUCAAAUUAUUUUUUAUGAA
81066	MMP0069	0.799395	0.799515	1.0006	0	UUAAUAUUCAUUGUGGGGUAUUGUCCACACAGUUUA
82260	MMP0070	0.446799	0.901494	5.61589	0	GGCGCUCUACCAGGCUGAGCCACUGAAGCACACUUA
82574	MMP0071	0.257139	0	0.742861	0	UAAAAUAAAAAUGGUAGCCCAGCGCGGAUUCGAACC
84858	MMP0072	0.558807	0.204541	0.55464	3	AAUAACUCAAAUUUUAUUUUCACAUUUUUUUACAAU
86193	MMP0073	0.470768	0.199999	0.66154	3	UUUAAUUAUUUUUUUUAAUAUUUCUCAUUUUAAAAA
87503	MMP0076	0.664733	0.6367	0.922837	2	CGAAUCACUCAUUCGAUUCUUUUAUUUUUUUAUUAG
88729	MMP0077	0.386789	0.223527	0.789739	3	GCAAAUUUAAUAAUCUUUUAAUUUUUCUUUUAAAGA
88550	MMP0078	0.458324	0.312494	0.787886	1	AUUUUAUCAGUUGGUGAUACCGGCUGAAUACAAAGU
90377	MMP0079	0.538009	0.232874	0.602236	2	UGAUAUUAAAAAAUAAUUUUUUAUAUUUUUUAAAAU
91765	MMP0080	0.249995	0.0485433	0.78827	1	ACAGGGAAAUAAAAUUUUAACUUACCCUAACAGAUG
95095	MMP0083	0.695254	0.505951	0.616834	3	UCCUUUUAAUUUUUAAUAAACUUACUUUUUUAGAAA
97056	MMP0086	0.739114	0.585712	0.62972	0	AGCCAUACAAUGCAAUUUACGCGGUAACCGAGCGAA
97728	MMP0087	0.495408	0.316664	0.738424	2	UUUCAUUUCUAAAAACUUUUUUUGAAUUUUUAAAGA
100124	MMP0089	0.272719	0.401457	1.21509	0	AAAACUUAUUGAAAAACAUAGGUGAAUCUAUGUUGG
101827	MMP0091	0.394936	0.303863	0.869174	1	AGUGGAAAACUACCCACUAAUCUCUUUUUUUGGUGU
102506	MMP0092	0.260354	0.14466	0.864739	2	GUAAAUUCAAAUAACGCUUUUCUACCAUUUUAUUAU
102873	MMP0093	0.620802	0.37891	0.610536	3	AAAUUAUAAUUAUUUUAGAUAUCUUUUUUUUAGACU
103224	MMP0094	0.227845	0.104615	0.862372	0	UGGUAGUGAAAAAAAGGAUAGACACUAUGCCAAUUA
105953	MMP0095	0.456784	0.191615	0.671977	2	GAAAGCCUUUUAAUUCCUUCAACUAUUUUUUCGUCA
105883	MMP0096	0.202529	0.174241	0.965743	2	AAAAGAAUAUUUAAAUUAAUUUUAUUUUUUUACCCA
107759	MMP0098	0.795532	0.625326	0.545722	3	AUAAUUUAUUUUAACCUUUUAAUCUAUUUUUAAAUU
109266	MMP0100	0.677774	0.346151	0.492814	3	AUCUAUUUUUAUUCUUUUUUUAUUUUUUUAUCGCGA
111759	MMP0102	0.769201	0.464269	0.430811	1	UAUUAAAAAAUCAACAUACUUUUUUAUAUUUGAAAA
112903	MMP0103	-1.0773	-0.500443	1.38446	0	AAAUUGCCUCGGUGGCUCAGCCUGGUAGAGCGCCUG
114416	MMP0104	0.533316	0.105768	0.521883	0	AUCCACUAUUAACAUUUAUAUAUUACUUUCUCAGAU
115028	MMP0105	0.569851	0.22456	0.554716	2	UAAAACUUGGGAAUUAAUCUUUUAUUUUUUUAUUGG
116250	MMP0107	0.647021	0.283016	0.492311	3	UUACAUAUUUUUAUUAUUUUAUAUCUUUUUUAGAUA
117403	MMP0108	0.736803	0.402982	0.440852	3	CUACAGAAUAAUUUUUUUACUUAUUUUUUUUCAGGU
120016	MMP0110	0.407392	0.0799987	0.644138	2	AUUUAAUUAUUAACUUAUUUUUAAAAUUUUUAGGUA
120506	MMP0112	0.565193	0.124997	0.496921	1	AUAUGCCCAAUUUAUACUCCCAUCUUGUUUUAUCAA
124108	MMP0115	0.422217	0.165288	0.692194	2	UAAUCAUUACUUUUUUAUCCCAUCAAGUUUUAAUUU
125221	MMP0116	0.174601	0.262133	1.11863	3	AUUUUAAAAAUAUUUUAUUUAUUUUCUUAUUACAUU
130258	MMP0123	0.692881	0.384103	0.498653	4	AUUAAAUAAUUUUUUUAUUUUUUUUAUUUUCAGUUG
130862	MMP0125	0.553561	0.119999	0.507316	1	CAUUUAUUUCUUCCCCAGAACAGAUUUUUUUAUUGG
133593	MMP0127	0.835989	0.766245	0.701636	2	UAUUACUAAAACAUAUUUCUUUUUUAAUUUUCAGCG
134963	MMP0128	0.428551	0.36362	0.897968	3	AUACCUUUUUUUAAUUUAUUUUUCGAUUUUUCAAAA
137203	MMP0130	0.673064	0.218743	0.418475	1	AAUUAUAUCAUUACAAAAAAUCUCUUUUUUUAAAUA
139417	MMP0132	0.406976	-0.205607	0.491889	3	UUAUUUUAAAAAACUAUUUUUAAACUUUUUUCAAAG
139419	MMP0133	0.613332	0.45169	0.7052	2	GAUAAUUCUCUUUUUUAUUUUUUAUUUCUUUGAAAA
141453	MMP0134	0.417265	0.567862	1.34849	0	UGGUAUAUAGCUAAUAAUUAGAUUCCCCAAUUUCCC
143008	MMP0135	0.159573	0.0990983	0.932873	0	AGAAUUCCCUGAAAAAGCUACAGUUGGCGAUAUCAU
143392	MMP0136	0.781817	0.484303	0.423084	4	UUUUUAUUUUAUUAUUUUUUACAUUAUUUUUCGGUG
144442	MMP0137	0.536224	0.383719	0.752539	2	CAAUCACAAAAUACAAUUUUUAAAAUUUUUUGAAAA
148259	MMP0139	0.742836	0.515821	0.531135	2	CAGGUAUGCCUAAUUUCUUUUUUCUUUUUUUAAAAU
150596	MMP0141	0.746148	0.524997	0.534422	3	UAUUUCUUUUUUUUUAAUUAUCGAUUUUUUUGGUGA
154179	MMP0144	0.666648	0.525666	0.702779	2	UUCGUUGAAUAAAUUAAUAUUUUUUAUUUUUGUGAU
159974	MMP0148	0.604648	0.142854	0.461243	5	UUUUUUUUCUUUUUUUAAGUUUUAAUUUUUUCUGUA
161769	MMP0150	0.592045	0.482986	0.789059	2	GCUAGGGCAUAAUCCAUUACUUUUCUUUUUUGGUUU
161829	MMP0151	0.223877	0.0901854	0.853056	2	UCGCUUUUUUAACGAAUUAUUUUUCAAGUUUAACGA
163489	MMP0152	0.611103	0.292682	0.54982	3	UAUGGCCAUUUUAAUUCUAUUUUUUUUUAUUGAUUU
163911	MMP0153	0.666651	0.0191078	0.339843	1	AAAAAAUCAUAAAAUAACUUAAAACUUUUUUAAGGU
167318	MMP0155	0.438596	0.180698	0.685223	3	UUAACCUUUUUUUCAUUUUUUACUCAUUUUUAUAUU
168058	MMP0156	0.128787	0.0607965	0.927608	0	CAGAGACAGAUGCAAGAGCAGCAAAUGCAGUACGAA
168387	MMP0157	0.0769228	0.0830946	1.00673	1	UUCUGCCAUAAUUUUGCAUAAUCUGGGCUAUGACAU
169092	MMP0158	0.666982	0.532816	0.712821	1	UUAAAAAAUAAUUAAAAUAUCUUCUUUUUUUAAUCA
169152	MMP0159	0.133332	0.068301	0.930201	0	UCAAAAAAAUUAAAAAAGUAAUUUAAUUCACGUUUC
172156	MMP0162	0.429748	0.205881	0.718093	0	AGAAAAUGGAACCAAGUACAUCAUGUUUGGUGGAAA
173135	MMP0163	0.545698	0.246089	0.602593	4	UUAAAUAAAAUACUUUUUUUUAUUUUUUUUAAAAUU
173076	MMP0164	0.403819	0.367396	0.942423	1	AAUUAAGCUACAAUUACUUCUUUUUCUUCUUCGGAU
179418	MMP0170	0.249992	0.0476172	0.787507	2	AAAGUGUUUGAAUCUCUUUUAAUUUCUUUUUCAUUC
181790	MMP0173	0.166665	0.0824737	0.908241	1	UUGUCAACAAGACCACAAAAUAUUAAUUUUUGAAGU
181549	MMP0174	0.449989	0.241934	0.725546	1	GAAUUUAACGCCAUCUCUAUCAUAUUUUUUUAUCAG
183658	MMP0176	0.425924	0.336632	0.865396	3	AAUAUCAUUUUAAUUUUCAUUUAUUAGUUUUAAAAC
186676	MMP0178	0.999857	0.999001	0.14298	0	AAAAUGCGGUUGAAUAUUUCAAUAAAUAAUUAAAAA
190614	MMP0180	0.504757	0.361108	0.775159	2	AUAAAUUACUUUUUUCAUAAUUCUUAAUUUUAAAAG
191187	MMP0181	0.687499	0.51643	0.646237	4	UAAAAUAUUGUUUUAUUUUUUUUAUUAUUUUACUUG
191969	MMP0182	0.616817	0.186206	0.47086	2	ACUAUUAAUUCUUUUUUAAGUUUACUUUUUUAAAAU
192369	MMP0183	0.425618	0.192592	0.71139	1	UUUGAAUUCACUCGAAUUUAUCUUCUUUUUUAAAAA
195238	MMP0186	0.277774	0.0393695	0.751825	2	AAAUUAAAAAUCAGUUAUAUUUUAUCUUUUUCCAAG
195193	MMP0187	0.240961	0.230767	0.986749	4	AACUGAUUUUUAAUUUUUUUUAACUUUUAUUAAAAU
197700	MMP0188	0.327772	0.211485	0.852523	1	UUCGAGGGUUCAAAUCCCUUUCCCUCCACUUUUUGA
198553	MMP0189	0.842687	0.43055	0.276254	0	UUUCCCAAGGUAUUUCCCACCUUUGGGCAAAUAUAA
198616	MMP0190	0.413779	0.24675	0.778256	2	AUAAGGUACAUCUCUCUCUUUUUUCUUUUUUAACCC
201933	MMP0192	0.730741	0.704624	0.911579	2	GAAUGCGAUUAAAUUCUUUUUUUAAUUUUUUAAAUA
203390	MMP0194	0.319999	0.179347	0.82861	3	UUUUAAAUUCAAAUAUUUUUUAUUUAUUUUUUAAUU
212038	MMP0204	0.809516	0.36453	0.299753	3	UAUAUAAAUAUACUACUUUUUUUUAUUUUUAAACGA
213403	MMP0205	0.499996	0.318963	0.73418	2	AUUAAAAAUUUCUUUUAUAUCUACAUUUUUUGUAGU
216519	MMP0209	0.424229	0.1923	0.712852	3	AAUAAAUUAAUUUUUCGAUAUUUUUUGUUUUAACGA
218172	MMP0210	0.44826	0.111098	0.620698	3	CGAGACUAGUAUCUUUUAUUUUUAACUUUUUUAUCU
218848	MMP0212	0.671293	0.469023	0.61906	2	GAAAUUUUUAACAUCCAAAUUAUAAUUUUUUGAAAC
221514	MMP0214	0.359986	0.343739	0.975244	0	CUAGUGAAAAAAUGAAAGCAUUUGACAUAAUGAAAG
222651	MMP0215	0.506166	0.134327	0.570462	3	AAUAUUUUUUUAUUUUAUUAACUCUUAUUUUAAAAU
227262	MMP0219	0.737366	0.4322	0.462546	3	UUAAAAUUUUAUACAUUUUUUACUCUUUUCUCAAAA
228870	MMP0220	0.606042	0.173911	0.476895	2	UUAAUAAUUUUUAUUCCAUUUCGUAAUUUUUAGAGA
230579	MMP0221	0.813248	0.439391	0.333123	2	CCAAUCAUAUUUAAAAUAAUUUUUUUAUUUUGGGGU
230856	MMP0222	0.333323	0.022222	0.681828	0	AGGUGUAAUUUAUGAAAUUAGACGCAAAAGUUUCAA
232431	MMP0224	0.579205	0.280422	0.58478	3	AAUUGUAAAUUUUCUUCUUUUUUAAUUUUUAAAAAU
234254	MMP0227	0.392149	0.580355	1.44849	3	AAUUUCAUUUUUUGUUCUUUUUUUAAGUUUUAUCAU
237999	MMP0228	0.160713	-0.00990107	0.831059	2	AUUAAUUUAUUUUUAUGUUAUAUCUAUUUUUAAAAU
237961	MMP0229	0.617183	0.357721	0.596029	1	AUAUAACAUAAAAAUAAAUUAAUAUUUUUUUGAAUG
238755	MMP0230	0.527763	0.195648	0.587102	2	CGAAUAAUUAAUUUAUUUUACUUUUAACUUUGAAAA
241456	MMP0233	0.351342	0.199996	0.810819	0	CAAUAUAUUUAAUAUCCAUAUUUAUUAUUUCAUUGU
242678	MMP0234	0.568279	0.198472	0.538622	2	AUAUAAAAUAUUUAACUAUUUUUUUAUUUUUAAUAU
243548	MMP0235	0.739556	0.402541	0.435919	2	GGAUGCUUUAAACUACCUAUUUUUAAUUUUUGAGGA
244511	MMP0237	0.520822	0.329997	0.715187	3	UCCUGGAUUUUAAUAUUGUUUUUAUUGUUUUCAUCA
245811	MMP0239	0.333311	0.238634	0.875648	1	GCCCAGUAGUGGUGUUUUUAUGAUAUUUGAUAGCGA
248202	MMP0241	0.431692	0.190751	0.702266	3	AAAUAAUUUUCCAUUUUUCCAUUAAAUUUUUCGCGU
249779	MMP0245	0.790591	0.620365	0.551608	2	AAUAAAUUAAUUUUUUACUAUACUCUUUUUUAAGGU
250381	MMP0247	0.470575	0.0350871	0.548677	0	AAAAAAAGCCAGAAUUAUUUAUGAAUCUGCUUAUCC
250766	MMP0248	0.29268	0.214788	0.900801	1	AAACCCUGGAAGGCUCAAAAUAUUUAAUUUUGAAAA
251109	MMP0249	0.679557	0.410111	0.543226	3	UAAACCAUUUAUUUUUCAUUUUAAGCUUUUUUAGGU
251393	MMP0250	0.295998	0.224598	0.907919	0	CUAAAAAAAUUGGUUCAGCAGGAAGAUUUGGAUCAA
253592	MMP0252	0.489681	0.545058	1.12172	4	UAUUUUUUUCUAUUUUUUAUUAUUUUAUUUUGUUAU
257411	MMP0254	0.279989	0.0468747	0.755422	0	AUGGAAAAUGAUGUAUUUAAGGCAGAUAUGCACAUA
258241	MMP0256	0.209999	0.0980387	0.87587	2	UUCUUGAAUUACUUCUUUUAAUUUCUGUUUUGCUUU
259589	MMP0258	0.643009	0.400289	0.595272	3	AUAAUUACUUUUCCGAAUACUCUCUUUUUAUUUUAG
259899	MMP0259	0.0967735	0.013761	0.915829	0	UGGAGGUGUACUUUAUGGAAUACAUAUACGCAGCAU
260928	MMP0260	0.167938	0.0604647	0.885611	0	UUAAUGCAUUAAAAGAAUUACUUAAAAGUUCAAACA
261811	MMP0261	0.50769	0.369562	0.780903	2	GAUAUUUUAUAUCGGCAUAAUUUAUUUUUUUAACUU
264952	MMP0263	0.531233	0.594194	1.15515	1	AUUCUUUGGAAAAGUAAUGUACAUAUUUUUAAAUAA
265924	MMP0264	0.691349	0.338456	0.466561	3	AGAAUAAUUAGAUUUUAUUUUUAUAUUUUUUAAGGG
266375	MMP0266	0.536572	0.36486	0.729646	3	AAAACUUUUUUAUUCUUUUUUUUAUGUUAUUUAAUC
270025	MMP0270	0.370364	0.19999	0.787036	2	AAAACCAUAAAUUUCUUUUAUUUUAUUAUUUGCAUG
274295	MMP0274	0.494732	0.433326	0.891639	1	CAAAAAUCCAAAACUUACUUUUUUUAUAUUUAAAAU
277177	MMP0276	0.536572	0.270828	0.635553	2	UUUAAUUCUUUUUUUAAUUUAUUAAAUUUUUAAGCU
278294	MMP0277	0.65624	0.212761	0.436666	1	UUAAAAAUAAAAUACCCAAACUAUUUAUUUUGGCAU
280213	MMP0278	0.212115	0.183096	0.964477	1	AAAGUAGCGAGAUAGAAAUAGAUUUUAGAAUUGAAA
281485	MMP0280	0.49339	0.209677	0.641016	3	UUAACUUAUUUUUUAAAUUUUAAAUAUUUUUUAUCG
283495	MMP0281	0.199997	0.0833324	0.872729	2	CUAAAUUCAGCUAAUUUUUUUUCAAUUCUUUCAUCA
283366	MMP0282	0.450545	0.0752677	0.594178	2	AAAUUCUACGUAAAUAUCUUUUCCUUUUUUCAUUGC
284520	MMP0283	0.256753	0.0503143	0.782624	2	UAAAUAACCUCAUUUGGCCAUUUUUUAUUUUCAAGU
286563	MMP0284	0.278684	0.0503594	0.759567	1	AAAUUUAACUUAACUUAAUAAUUUUCUCUUUCGGAG
288095	MMP0285	0.202796	-0.0187501	0.782532	0	ACAAGUUAUUGUGGCAUCCUGAUUAUAAUCCCGAAG
288286	MMP0286	0.189184	0.116666	0.917904	0	AUAAUUUACAAAAAAAGGUAGGGAUCAUGGUAUACG
289094	MMP0287	0.551715	0.0863299	0.490642	2	CCUUGAGCUUUAAAUUUUAAUUAUUAAUUUUAAAUG
289850	MMP0289	0.58503	0.428568	0.726194	2	GAUAAAUACAAUAUUCCUUUUUUAUUUUUUACAGUG
291632	MMP0290	0.265957	0.0779569	0.796105	3	AUUAUUGAAUAUUUUAUUUAUUUUUAUUUUUAAUUU
293083	MMP0291	0.426055	0.317399	0.840821	2	UACAAUAUUUAUGUCUACAUUUUUAUUUUUUAUAGA
292917	MMP0292	0.314605	0.163076	0.818945	2	CAUGUUUUUCUAACUUUUUCUUUCAUUUCUUCAAAG
295153	MMP0294	0.361501	0.173651	0.772676	1	UAAUUAAUAUUUCUUUAAUACCUUUUUUAUUACGUU
296273	MMP0295	0.641973	0.18676	0.440248	3	UUCUUAUUUUAUUUCCUUCUUUUACAUUUUCAAUCG
297294	MMP0297	0.702527	0.366863	0.46984	3	UUUUUACUUAAUUAAUAGAUUUUACAUUUUUGGUGA
298616	MMP0298	0.298291	0.307162	1.0128	4	UUAAUUCUUUUAAUUAACUUUUUUAGUUUUUAUUUU
300695	MMP0300	0.208325	0.0425519	0.82686	1	UUGUUUUUGAGGUUAUUUCAGAAGAUACUAUCUGUA
300929	MMP0301	0.673898	0.489786	0.639147	3	UUUUUAUACUUAUUCAAUUAGUUUUUAUUUUAACGU
301474	MMP0302	0.203735	0.107407	0.892081	4	AAAGCUUAAUUUUUUUUAUUUUUUUAUUUUUGUUCA
301432	MMP0303	0.314847	0.135593	0.792627	1	AUAAAAAAAAUUAAGCUUUAUUACUUUUUUUAACAU
306567	MMP0309	0.771572	0.481578	0.440622	3	AAUUUCUCUAUUUUUUGAUUUUACUUUUUUUAAUUA
307745	MMP0311	0.161285	0.17105	1.01178	1	GUAUUCAUAUUCCCAUCAAAUAGCCUUAUUUUGGCA
308642	MMP0313	0.619466	0.244092	0.503413	3	UAUAUUAUUUUUUUUAAUUUCGAUUAUUUUUGUGAA
314151	MMP0317	0.740241	0.605577	0.658579	2	CCAUGAAUUACUAUUUUUUUAAUCAUUUUUUAAAAU
314165	MMP0318	0.417807	0.362433	0.913148	4	CUAAAAUACUUUUUUUUAAAUUUUAGAUUUUACAUU
315906	MMP0319	0.434764	-0.0740712	0.526256	1	GUUUCAUUAAUUUAUACAUCGAUACUUUUUUAUUUA
318348	MMP0321	0.333315	0.209674	0.843558	0	GAUCGGGUAAAACCACAUUAGCUUACGCGAUUGCAA
319655	MMP0322	0.299998	0.135801	0.810001	2	UUCUUUUAAAAAUUUAAGUUAAUUCUUUUUUAGUAU
321139	MMP0325	0.714857	0.496891	0.566763	2	ACUUAUUUAAAUCUGCUUUUUUACAUAUUUUAACAC
324442	MMP0326	0.610682	0.268652	0.532329	2	UUGUUAAAUUUCUUUUUUUAUAAAAUUUUUUAAAAA
326055	MMP0327	0.499994	0.301201	0.715522	2	AGAAUAAGUAAAUUCUAACUUUUAAUUUUUUAAUAU
327273	MMP0329	0.2941	0.0535707	0.745856	0	AUCAUACUUUCAGUUCUUUAAGUGAUAACAUGUUUA
328103	MMP0330	0.378782	0.22105	0.797507	2	AGCCAUCCAUUUCUAAUUUUUCAAGUUUUUUUACAA
327787	MMP0331	0.215381	0.258739	1.05849	2	CGGGAUUUUUGUCGUUCUUAAUAAUUCUUUUGAUUC
331418	MMP0333	0.399997	0.0849052	0.655674	2	ACUUUAAAAUAAGCUGGCUUUUCUGUUUUUCGGGUG
332816	MMP0335	0.640844	0.389129	0.587942	1	UUAUAUUACAUUUCAGAAUCCAACUUUUUUUGAAUA
335564	MMP0339	0.808403	0.653763	0.553369	0	AUCGGGGGUUCGAAUCCCUCCGGGUCCGCCAUUACU
339321	MMP0341	0.916728	0.62658	0.222997	1	AUCGGGAGUUCGAAUCUCCCCGGACUCACCAUUUUU
339804	MMP0343	0.447357	0.285712	0.773698	1	UUCCAAAUUCUCCCGAAAUUACUACUCUUUUAUCAU
340560	MMP0344	0.769228	0.645069	0.650188	3	UUAUUUAAACUAUUUUUUACUUUUUUAUUUUAAAAG
341574	MMP0345	0.642811	0.343739	0.544279	2	UAAAUUAAAAUUUACCUUUUUUUAUUUUUUUAAUAA
342435	MMP0346	0.880425	0.704906	0.40521	2	GAUUUAAAAAUUAUUUUUUUCUUAAUUUUUCAGGUG
343771	MMP0347	0.607121	0.421045	0.6786	3	UUUGAAUUAUUUUUUGGAUUUUUUCGUUUUUUAAGU
344200	MMP0348	0.736357	0.552617	0.589301	1	AAAAAACCUUAACUUUCAUUGUUCUUUUUUUGAUUA
344899	MMP0349	0.766641	0.235287	0.305159	4	UUUUUUAAUUUUUUAGUAUAUUUUUAUUUUUCAAAU
346608	MMP0350	0.354827	0.36362	1.01382	0	CGGCUUUAGACGUCGCAUUAAAAUCGUUAAAAGUUA
347584	MMP0351	0.705841	0.59997	0.735343	0	UAUAAUCACGCUAGAAUUUACAAUGAAUUACAAAAA
349789	MMP0353	0.439991	0.261898	0.758715	1	UUGGAAAUUUGAAAUAAAUUUUUUAUUUCAUUGUGA
351228	MMP0354	0.205877	0.0892839	0.871977	1	AUUCAAAAUAUCCUCAAUUCCCAAAUAUUUUGGUUC
350850	MMP0355	0.521728	0.333331	0.717405	1	CCUAAAACUUUAGCAUACUUCUUUUCAUUUCCAGUG
355866	MMP0359	0.230765	0.187498	0.946748	0	UUUAUAAAUACCCCUGCACAAUUUCAUUUCUACAGA
357881	MMP0360	0.153843	0.0444439	0.885512	1	GGAUUAGUAUUAUCCCUAUUUUUUUAUUUAAGAAAU
359508	MMP0363	0.242417	0.099995	0.841755	3	UUUUAGCAUACGUUUCAAUUUUACUUUUUUUAGAAG
364283	MMP0366	0.466636	0.136357	0.617575	1	AAGAUUCUUUAAAAAUUAUAAUAUACAUUUUGGCAG
366972	MMP0369	0.864963	0.73294	0.505645	3	UUUAAAUACUUUUUCUUUUUUAUACUAUUUUGGUGA
368425	MMP0370	0.682537	0.450978	0.578234	1	CUAGUAGUAACCCUAUUUCUUAUCUUUUUUUCAAUC
369180	MMP0372	0.865601	0.689453	0.43278	2	UUACCAAACCAUUUCUCUUUUUUUGAUUUUUAAAAA
370632	MMP0373	0.702827	0.491646	0.584579	3	ACCUUUUUUAAGUCUAUUUUUUACCAUUUUUCGAUA
372673	MMP0375	0.212961	0.658701	2.30601	0	UCAGCAGGGAUGACAAUCAUCAUCGAGUGGUUUAUA
381394	MMP0382	0.575335	0.206889	0.535443	2	AUGACUUACUUUUAUUUAAUAAAAUUUUUUUACAGA
383571	MMP0383	0.824587	0.641974	0.489944	3	UUAAGUGGGUCUUUUGACCCACUUUUUCUUUUUUAG
384043	MMP0384	0.714273	0.33012	0.426534	2	GCCAUUUUAAAAAAAAUUUUUUUAAAUAUUUAACCC
384354	MMP0385	0.436356	0.142857	0.657584	1	CUACCAUUACUCCCUAAACCCUUUUCUUUCUAAAGA
385150	MMP0386	0.774187	0.585124	0.544289	3	AUCUUAUUGUUACUUUUUUAUUUUCUUUUUUCAGAA
386329	MMP0387	0.319837	0.059322	0.723057	1	ACUAAAUAAAACCAAAAAAUAUUAAUUUUUUAAAGU
386312	MMP0388	0.221052	0.268749	1.06523	1	AAAGAAUUACUUUAAAAAAUUAAUAUUUUUUGGUUU
388443	MMP0391	0.55963	0.366729	0.695389	3	AAUCUUUUUUAACCAUUAUUUUCAUUUUUUUAAUUA
389674	MMP0392	0.777691	0	0.222309	0	AUAAAUAAUAGAAAUAUAUAUCAAAUUCCAUCAAUA
391227	MMP0393	0.459995	0.198018	0.673338	2	AGUUUAAAUCCUAUUUUUUAAAAACUUUUUUAAAGU
391813	MMP0394	0.358204	0.33628	0.966969	3	AAUAUCUGAUUUUCUAUUUUAUAAUUAUUUUAUUGU
394439	MMP0396	0.441526	0.244147	0.738865	4	UCUAUUUUUCAAAUUUUUUUUAUUCAAUUUUAUUUA
397298	MMP0397	0.708328	0.436239	0.517367	3	AAAUAAAUAAUUUUAUUUCUUUUCUGUUUUUGAUAA
399169	MMP0399	0.838683	0.472522	0.305828	0	CGGAAUUAAAUGCAAACAUAGUGUACACUCAGCAGU
399748	MMP0400	0.770365	0.46808	0.43171	4	UUUAAUUUUAUAUUAUUUUUUUUAUUUUUUUGGUGA
400702	MMP0401	0.32352	0.070174	0.727534	1	UGAGAUUGAAAAGGAUUUAAUUUAAACUUUUAGGUA
402118	MMP0402	0.614277	0.425922	0.6719	2	AUCUAAACCUUAUUUUUUUACAAUAUUUUUUUACAA
405334	MMP0405	0.600466	0.217572	0.510634	1	GUGCCCAAUUUAAACUAAUUCUUUUUUUAUUCGGGA
406248	MMP0406	0.118881	0.0169488	0.896311	0	UUAUGAUUUCCCUUCCAUCUCCGUAAAGAUCCAUCU
405959	MMP0407	0.568061	0.486257	0.840768	3	UUUUUUCAGGGAAAUUUUCCCUAAUUUUUUUCAAGU
407657	MMP0408	0.461527	0.105258	0.601819	2	AAUAAAAAAUUAAACUAUUUUUUCAAAUUUUCAACA
407612	MMP0409	0.249994	0.258056	1.01087	3	AGUUUAAUUUUUUAUUUUUAUUUAAUUUUUUAACUU
409784	MMP0411	0.384601	0.132742	0.709592	2	AAAAUUAUUUUAUUUUAAUUAUUCCCCAUUUAAAAU
414056	MMP0413	0.499991	0.598923	1.24666	2	UAAAUACUCUUUUUACUAUUUUUAAUUAUUUCAAAA
414058	MMP0414	0.666663	-0.475858	0.22586	3	UAAAUUUUUAAACUUUUUUAAAAUCUUUUUUGAAAU
417972	MMP0415	0.266661	0	0.733339	0	UUCUAGGAUCCCAGGCUGUUACAUACCUUCAACUGC
420358	MMP0418	0.564507	0.199994	0.544362	4	UUCUUUUUUUUAGUUUUUAUUACCUAUUUUUCCAAA
422135	MMP0419	0.790959	0.467947	0.392895	5	AUUUUUACUUUUUUUUUACUUUUUUAUUUUUAAAAU
423280	MMP0420	0.509082	0.489793	0.962193	0	UAACCUUUAAGGUGGAAAAGAUGUACCAGAUUAUUA
424216	MMP0421	0.244893	0.269229	1.0333	0	UUAAAAUCAUCAAGAAAAUAGGGAAAAAUAUGGAAA
424715	MMP0422	0.506323	0.246572	0.655241	1	UUAUUCUCAAACAGUUAAAACAAACUUUUUUAAGCG
426256	MMP0423	0.363628	0.38333	1.03195	2	UUCUUGUCUUAAAUUUUAAAUUACUCUUUUUAAAUA
426267	MMP0424	0.421042	0.057691	0.614404	1	AUCAAAAGACCAAAUAUUCUUUUUUCACUUUAAUCA
428179	MMP0426	0.145831	-0.0833321	0.788465	2	UUACAUAAAAUAAUUUCUCUUUUGAUUUUUUGAAAA
428180	MMP0427	0.719619	0.464283	0.523375	3	UUUUUAAAAUAUUUUUCUAAAUUAAAUUUUCAAAAA
429247	MMP0428	0.599992	0.342589	0.608459	3	GUUUUAUGAAAUUCUAAAAAUUUUCUUUUUUAAAUA
430941	MMP0429	0.563105	0.255143	0.586548	3	CUAAGUUCUUUUUUAAUUUUUUUAUUUUAUUACAUC
431685	MMP0430	0.434776	0.327799	0.840856	2	UGUCGAAGAAUAAUCUUUUUUUCUGAUUUUUAAAUU
431708	MMP0431	0.613629	0.23936	0.507955	2	UUAAAAUAACAAUACUAUUUUUUAAAUUUUUAAAAG
434523	MMP0433	0.232756	0.1133	0.86528	4	AUAAAUUAUUUUAAUAUUUUUUUUAGGUUUUUGAAG
434482	MMP0434	0.639093	0.568771	0.836927	2	AAAAUAUUAAAAUAAUUUAUUUUUAAUUUUUAAGAU
439500	MMP0439	0.144577	0.04301	0.893868	2	CAGAAAUAAUUCUUAAUUUUUAUCCGAUUUUAAGAA
440226	MMP0440	0.47321	0.136239	0.609879	2	AAUUUUUUCACCAUUAUUUCUAUUUAAUUUUAAUUU
440436	MMP0441	0.578613	0.256637	0.566866	2	GCUGAGCGUUAAAUAACUUAAUUUUAUUUUUGUUAU
441099	MMP0442	0.220993	0.248996	1.03729	0	CAAACAAACAAGUUCUCGUAGUUGACACUUUAGAUC
441512	MMP0444	0.539311	0.222102	0.592222	2	UAAUAUUUACUUCUUUUUUAAUAUUACUUUUAAUUU
442499	MMP0447	0.729673	0.561538	0.616534	4	UUUUAAAUUAUUCUUUUUUUUUAAAUUUUUUAAAUA
445582	MMP0452	0.628565	0.337833	0.560938	2	AAAUAUCGCUAAUUCCUUUUUUAAAAUUUUUAAAAC
447659	MMP0455	0.299992	0.0833299	0.763642	1	AAUACUUUUUUAAAUAAUACUAUUUACUGGUUAAUA
451881	MMP0457	0.667424	0.370434	0.528261	3	AAAUUAUUUUAAAUUCUUUUUUUAAAUUUUUAACAG
454118	MMP0458	0.500599	0.75632	2.04941	1	AACCCGAGUUCAAAUCUCGGUCUCCGCGUUUUUGAU
454987	MMP0459	0.879278	0.294962	0.171228	0	GUUUCCCAAGAUAUUUCCCACCUCGGGCAAUAUAAA
462501	MMP0464	0.41174	0.33332	0.882371	2	UCAAACAUUAAUCUCUUUUGCUACUUUUUUUAGUUU
473692	MMP0476	0.428564	0.228309	0.740499	2	AAAUAACUUGUUUACUCUUUUCACAAUUUUUCAACA
476399	MMP0480	0.314431	0.107018	0.767729	2	GUUAACCCUAUUUUUUCAAUAUUCUCUUUUUCAGUG
478546	MMP0482	0.413786	0.355552	0.909637	3	GCUUAAGCUUUUUUACUUUUUUAAAUUUUUUAAAAC
485746	MMP0487	0.571388	0.384586	0.696462	3	AUUCUUUUUUUAUUUUUUAUAACAAUUUUUUGUAAA
486352	MMP0489	0.630128	0.408445	0.625253	2	GAAUAACCUCCACAUAUUUUUUUAAUUUUUUAAACU
487165	MMP0490	0.454532	0.199997	0.681833	2	UGAUUAAUUUAUUACUUUUUUAAACUAUUUUCCACA
489215	MMP0493	0.45713	0.44185	0.972625	3	AGAAAAUAAUCCUUUUCUUUUUUUAUUUUUUAAAUA
501265	MMP0496	0.551705	0.23528	0.586221	2	UUACUUUCAAAAAUAUCUUUUAAUUCAUUUUCAGAG
502734	MMP0498	0.659993	0.291664	0.480007	3	UCAGCAAAAUAAUUAUUUUUUUUAGUUUUUUUAGAA
504477	MMP0500	0.691482	0.571424	0.719868	2	AAGAGUGUUUAUUCACUUUUUAAGUCUUUUUGAAUC
507594	MMP0502	0.394727	0.224488	0.780482	2	GUGUGAUUAAAUAAACUUUUUUAAAUUUUUUUAAGA
517291	MMP0511	0.90474	0.222197	0.122473	2	AGAUUUUUUCUUCCUUACACUAGUUUCUUUUGGAAA
520991	MMP0514	0.839966	0.357117	0.248931	3	UUUCUUUUUUAUCUACUUUUUUUGUAUUUUUUAUAG
522603	MMP0516	0.326312	0.243586	0.890634	1	UAAACUAAAUUAUAAUUUAAUAUUCAUUUUUGUACA
523552	MMP0519	0.833264	0.0999902	0.18526	2	UAAAACUAAAAUUAUAGCUUUUUUUCAUUUUAAGGC
529994	MMP0524	0.871552	0.888856	1.15569	2	AUAAAAUAAUAUCCAUAUCUUUUAAUUUUUUAAAAA
532483	MMP0526	0.122447	0.11111	0.987247	0	CAGUUCAGGUAAUAGUUCAAGGGGACACCACGUAUG
532907	MMP0528	0.539264	0.0969162	0.510181	0	UAAAACUAUCCCCCUAACUUCUAAAUCACUUAACGU
533436	MMP0529	0.804485	0.864715	1.44521	0	UAUACCCCAGAAAAAUUAAUUCUGGGAUAAUAUAAA
536708	MMP0531	0.319142	0.290904	0.960177	2	UAAAUCAGUAUAACUUUUUAUAUUCUUUUUUACAAA
538311	MMP0532	0.571417	0.212761	0.544413	1	UAAUCUUCCUAAAAUUCUCUUUUUUCCUUUAAAUCG
538998	MMP0533	0.595732	0.273806	0.556694	1	GAAAUAAAUAUUAUUCUUUUACUAAUUCUUUGGAUA
539165	MMP0534	0.327863	0.126435	0.769418	2	AAAUUAUUAAAAAUCUUUUGAAUAUUCUUUUAAUGA
541038	MMP0536	0.36362	0.124992	0.727285	3	AAUAAUUAAAUUUUUUAUUUUACAAAAUUUUAAAUU
543327	MMP0538	0.636354	0.407404	0.613649	3	UCUUAUUUAUUUUUCCGAUUUUUUAAUUUUUAUUAA
544944	MMP0539	0.496685	0.333331	0.754969	3	UAACACAUUAAUUUUCGAUUUUUUUAUUUUUACUAU
545764	MMP0540	0.459009	0.129411	0.621408	3	GCUUAAAAUAAUUAUUUUUACUUUUCUUUUUACCGA
546469	MMP0541	0.319993	0.292855	0.961622	2	UGACUUAAAACAGCUUUUUUCGAACUUUUUUGCUUU
547230	MMP0542	0.537493	0.446968	0.836311	0	UAAAGCCUCAUAUUGUCAUAGGUGACCUUUCAAAAA
547856	MMP0543	0.566648	0.0975584	0.4802	0	GCGAAAACAUAGAUUGCAAACUUUAUGCUGUAAACU
548899	MMP0544	0.53842	0.263153	0.626426	0	AAGAUAUAGUUUCAAGUGUAGAUGUACCUCCAUUUG
550621	MMP0545	0.642099	0.389259	0.586012	2	AUGAAUGUUAAAUAUUCUUUUUUUAAUUUUUAACAG
551449	MMP0546	0.274504	0.0687496	0.779055	2	CUGGAUGUUAACCAAUACUUUUUUUAAUUUUGUCAA
554010	MMP0549	0.30952	0.173683	0.835612	2	AAGAUUUAUUUAAUUCUUUUUUAAUUUUUUUAUAAA
554982	MMP0550	0.798812	0.66666	0.603552	3	GAAUAAUUUUCUAAACUUUUAAACUAAUUUUGGUGU
556585	MMP0553	0.690715	0.32031	0.455039	2	UUUUUAACUGUAUCAGAAACUUUACUUUUUUCGAUU
559054	MMP0555	0.274993	0.105261	0.8103	2	AUUUCAAUCCCAUAAACGUUUUCUACAUUUUCUUUA
561232	MMP0559	0.734437	0.522319	0.555943	2	UGGAAAAUAAGUAUUUCUCUUUUUAAUUUUUAAAUU
562025	MMP0561	0.32432	0.249996	0.900903	3	UUAAAUAAUUUUUCACGUUUUUUAAAUUUUUGAAAA
562807	MMP0562	0.464269	0.212118	0.679964	3	AUUUUAAUGAAAUUUAUUUAAAUUUUUUUUUAAAUU
563218	MMP0563	0.888864	0.499972	0.222259	1	UUCAAUAUUUAUCCCCGAUAUAACUUUUUUUAGGAA
565674	MMP0566	0.682631	0.516481	0.656374	2	AAUUAUAAUAUAUAUCUUUUUUAUUAAUUUUAGAUU
571686	MMP0572	0.586877	0.424498	0.717849	1	AUUAAAUAAUAUCUUCUUUUUUUAAAUUAUUAUCCG
573182	MMP0573	0.227269	0.00568154	0.777146	2	UUGACAGAUAAUUUAUUUUUUAAUAAUUUUUCGUUU
573498	MMP0574	0.271787	0.12966	0.8367	2	UUAUGUUCUUUUAAAAUUUACAUUUAUUUUUAAUUU
573532	MMP0575	0.726303	0.672681	0.836179	2	UAAUUAAUUAUUUACCCUUUUUUUAAAUUUUGAGUU
573806	MMP0576	-0.324528	-0.055046	1.25542	0	CGAAACGAAAAACGUACUCAGAGAUGACGAUGAAGC
574641	MMP0577	0.376236	0.208897	0.788474	0	CACGAAAAAGUCGUUGAAAAGGUUGUUGAAUUCGUA
575053	MMP0578	0.277105	0.0552142	0.765142	0	ACAAAUGUAUUAUAAAAUGAAACAAGAUUAUCUAAG
577831	MMP0581	0.681787	0.111105	0.357987	3	UUUUUGAAAUUUAAUAUUUUACUAUUUUUUUAUGUG
578988	MMP0584	0.707308	0.545451	0.643916	3	CUUUUUUCAAAAUCUUUUUUUAAUAUUUUUUAGUUG
582602	MMP0585	0.616632	0.229555	0.497593	2	AAGGGGACACGUUAUAUAAUUUUCUUUUUUUCGGUA
587453	MMP0589	0.122805	-0.0169495	0.862575	1	GUAGUCAAUUGUUACAUAUUCUUCGGUUAUUUUUGC
587316	MMP0590	0.464782	0.15238	0.631436	2	CAAAACACUAACUCGUUAUUUUACUAUUUUUCCAGU
588047	MMP0591	0.73684	0.451611	0.479879	1	AAAAGAAUAAUCUACAUUCCUUUACUUUUUUAAUGU
588699	MMP0592	0.378368	0.0819658	0.677134	2	UUAUGAAAAAAAUACACUACUUAUUUUUUUUAAGUU
593358	MMP0596	0.256407	0.391128	1.22126	1	AGGGUAAAAGAAAUUUUUGAUAACGUAUAUUCAGUA
594061	MMP0597	0.510202	0.220735	0.628539	1	UUUAAAUAACCUUAAAAUAUUUCUUUUUUAUAAAAU
595504	MMP0598	0.428556	0.153061	0.674716	2	AUUUACCAAUUCAUCUAUUUUUUCAAAUUUUAACGG
596114	MMP0600	0.574993	0.351722	0.655594	3	AAAGAAAUUUUAAAGACUCUUUUUUAAUUUUAACCA
596994	MMP0601	0.708501	0.570604	0.67886	2	AUUUGAAUAAUCCUUCUUUUUUAAACUUUUUAAUUA
599301	MMP0603	0.136362	0.0472098	0.90643	0	AUCAACGUACUCUCUUAAAUAUUUAUAAUUUACUUG
599990	MMP0604	0.67862	0.437228	0.571067	1	UAUUAAUAAAAUUUCUACAAAAUCUUUUUUUAAGUA
600623	MMP0605	0.598744	0.289075	0.564414	3	GGAAAUAAAUUUAUCUUUUUUUUUAAAUUUUAAAAA
600617	MMP0606	0.295179	0.0874997	0.772406	2	CACCAAUAUAAUUUUACUAUUUUUAAAAUUUAAAAA
603086	MMP0608	0.411757	0.142855	0.686282	2	AAUCUUAAAAAAUAACUUUUUUUAAGUUUUUAGGUU
607101	MMP0610	0.409829	0.0924363	0.65028	0	CGGAAAAUAAAAUAAUCGUAGAUACUUCUUCAAAAG
607540	MMP0611	0.164705	0.0735285	0.901587	1	UCUUUAAUUUAUUCCCAUUUUUUAACGGUUUCAUAA
609102	MMP0613	0.524582	0.193542	0.589514	2	ACAAUAAAUCUUUUUUUAAACUUUUUUUAUUAAAUU
609929	MMP0614	0.711063	0.773864	1.27771	0	CUAUUGGCAGUAUCACGAAAUCAACUGCCAAGUAAU
609807	MMP0615	0.755503	0.682255	0.769475	1	UCCAAAGGUAGAUACAUUAAUCCUGCUUUUUUAAAA
613376	MMP0617	0.285704	0.193542	0.88572	1	UCCUAUCAAUAAACUUUUUUCUAAUUAUAUUAAUUU
615899	MMP0620	0.843009	0.526991	0.331899	2	AUUAAUUAUAAUAUCUAUUUUUUCCUGUUUUAAAAG
618826	MMP0624	0.520547	0.367918	0.758529	2	UAAAUUUUUUGAAAAUAAAUUCUCUUUUUUUAAAUU
618875	MMP0625	0.803534	0.672377	0.59967	1	GUGCUAAAAUCGCACUUUAAUUUCUUUUUUUAGAAU
619060	MMP0626	0.17073	0.0369512	0.861088	0	CACCUGUGUUAUCGUUGAAGUAUUAGACAAAAACUU
619644	MMP0627	0.458643	0.224949	0.698479	0	GAUUUAUCUUCAGAGACAUGGCAAAAGAAAUGAAUA
620651	MMP0628	0.622941	0.150683	0.443956	0	AUAAAAAAUCGAAUACCCCUUUAUAUAUCUUGAAAA
621166	MMP0629	0.463082	0.289855	0.756068	3	UCCAACUAAUUUUUCUUUUUUACAUUAUUUUAUGUU
621298	MMP0630	0.481475	0.223212	0.667524	2	AUUUUAAUCCAGAUCUUACUUUUUUUACUUUGACCA
624311	MMP0631	0.433329	0.212118	0.719234	1	UUUAAAUAUUAUUCAUAAUUUAGACUUUUUUAAUAU
625637	MMP0632	0.607121	0.232139	0.511654	3	AUCUUGUUAUAUUUUUUUAUUUUUUUAUUUUAGUGA
626341	MMP0633	0.60475	0.425991	0.688578	2	CGAAGAAUAUUAAUCCUUUUUUUAAUUUUUUAAGGG
629868	MMP0636	0.52747	0.335712	0.711334	2	AGAAUAAUAAAUUAUUUUUUUCUUAAAUUUUAUCAA
630442	MMP0637	0.490557	0.374998	0.815107	2	UACAAAUCAAACUAAUUAUUUUUUUAUUUUCAAUUA
632816	MMP0638	0.152939	0.241705	1.11706	4	UUUCUUUUUUUUAAAUUUUUAAAAUAUUUUUCAAAA
632843	MMP0639	0.462717	0.469258	1.01232	2	CAAUAAUUCCUCUAAAUCUUUUUUAAUAUUUGUUUU
633814	MMP0642	0.378368	0.176465	0.754834	0	UUUCUAAAUUUCCAGUAGAUUACACCAUAACUAUUA
636033	MMP0643	0.407581	0.326387	0.879465	2	CACAUGAACCAUACAGUGUUUUACUCUUUUUAAUUU
635955	MMP0644	0.309089	0.253332	0.925326	1	AUAAUUUAACUUAAACUUCCUACAACUUUUUCAAAC
638295	MMP0646	0.299998	0.160376	0.833709	1	AGCAGUUUUCGCUCUUACUUAUUUCCAUUCUGUGGU
638055	MMP0647	0.245898	0.0493818	0.793276	2	AUAACAUUUCUACUGCCAUUUUAUCCAUUUUAGAAU
643703	MMP0651	0.537875	-0.33928	0.345055	2	UUAAUCUUUAAAUUAAAUUUUAAACAUUUUUAAAAA
646761	MMP0654	0.838672	0.679319	0.503081	4	UUUUCAUUUUUAACUAUUUUUUUAUUAUUUUAAAAU
647032	MMP0655	0.799973	0.285712	0.280036	1	AUAUUACUUUAGAAAAUAAUCAUCCAUUUUUAAGAU
647638	MMP0656	0.181517	0.423566	1.41991	3	AAAUGAUUAAUUCUCUUUUAAUUUUUAUUUUAAAGU
647646	MMP0657	0.34424	0.184309	0.803931	3	AACUUUUUUAAAUUUUCAAAAAUACUUUUUUAAACU
648022	MMP0658	0.624993	0.116666	0.424536	3	CACACUAACUUCUUUUUUAAAUUUUAUUUUUAACCA
650252	MMP0660	0.714235	0.124992	0.326586	3	UGCUUUUUUAAAUACUAAUUAUUUUGAUUUUGGUGA
654578	MMP0664	0.693537	0.114282	0.346005	1	GAUACUAUUUAAUUAAUAAUCCAAUAUUUUUGUGAA
655140	MMP0665	0.146788	0.0721643	0.919573	2	GUUUUUAAAAAAUUAAAAAUUAAAAUUUUUUAUGCA
655116	MMP0666	0.442306	0.271184	0.765206	3	AUGCAUAAAAAAUUUUAAUUUUUAAUUUUUUAAAAA
657833	MMP0667	0.559993	0.533831	0.943879	0	UAAAAAGAUUUAUGUGGUUUAAAUGGAAGAUUUGUA
658447	MMP0668	0.149423	0.149605	1.00021	0	CCGACUAUAUGUUAUAAUGAGGUGUAACAAUGGCAA
659149	MMP0669	0.776011	0.658516	0.655927	3	AAUAAUUCCUCUUUUUAAUUUUUUAAUUUUUAAGUA
660267	MMP0670	0.390619	0.607809	1.55379	0	CCCGCACGGAAUAAAGGUAAGGCUUGAAGAUGGGCA
660356	MMP0671	0.793076	0.599997	0.517306	2	CUAUUUAUCUAAAUCUUUUAAUACUAUUUUUACAGA
661348	MMP0672	0.44826	0.163932	0.659922	2	AAGGAAUAAUUAUUUAAAAUUUUUUUAUUUUGAAAU
662783	MMP0674	0.476179	0.119995	0.595247	1	AAUUACAUCAUACUUCCUUUUUUUAGUUAUUUAUUU
663530	MMP0676	0.794851	0.325839	0.304302	2	ACAAAAAUUAACUCUUAUUUUUUAAUUUUUUUAAAU
666694	MMP0679	0.305387	0.246376	0.921697	3	ACCAUAAUAAAAACUUUUUUUAAUUUUUUUUAAAAU
668365	MMP0680	0.727267	0.544941	0.599336	1	UAAGCAUUUAUAUGUUUCUAUUUCUUUUUUUAAGUA
668970	MMP0681	0.416649	0.597006	1.44754	1	GCACUGAAAAUAUUUCUUUUAGAAAAGGGCUCGUUA
670517	MMP0682	0.450591	0.123393	0.626745	2	ACAACGAAAAUAUCUAAUUUUUUUAAUUUUUAAAUC
671119	MMP0683	0.130433	-0.349393	0.644413	1	AUUAUAUAAAUAUUAAAAACCUAACUUUUUUAACUA
673036	MMP0684	0.48148	0.338541	0.783904	4	CUUUUUUUUAUUUAUCUAUUUUAAAAUUUUUAAUAA
673912	MMP0685	0.0775861	0.0373832	0.958236	0	ACGCAUACGCAGAGUAGCAUCAGGAAUUUGAAUUGU
675002	MMP0686	0.784426	0.0465103	0.226089	1	UUAAAAAGUUACCUAUAAAUAUCAUUUUUUUAAAAA
675768	MMP0687	0.484176	0.212121	0.6547	1	AAAAAAUAAAAAAAUUAAUUAUUCAAUUUUUACUUC
678806	MMP0689	0.874995	0.588587	0.303842	3	UAAAUCUUUUUUUCUAUUUUUUGAUUAUUUUAAAAC
680121	MMP0692	0.815898	0.670638	0.558965	3	AUCAAUUUUACUUUUUUCAGUUACUUUUUUUAAAUU
681160	MMP0693	0.321423	0.261774	0.919199	1	UUUAAUAUAUAAUAAACAAUAAUACUAUUUUAUUGC
682126	MMP0694	0.343913	0	0.656087	2	AGAUUGAGAUAAGUAUUCUUUUUUUAUUUUUAAUUC
684121	MMP0695	0.818401	0.371498	0.288939	4	AAGUAUUCUUUUCAAAUUUUUUUUAUGUUUUAACAC
684907	MMP0696	0.499979	0.136357	0.578967	2	CAAAAACUUACGCCAAAUUUCUUUUAUUUUUAAAAA
689861	MMP0698	0.644623	0.29921	0.507109	2	UUUUUAAAAAUAAAAAUUUAAAAUAAUUUUUUAAGA
692452	MMP0701	0.527763	0.489578	0.92519	2	UUAAUGUAAAUAUUAUUUUUAUAAUUUUUAUGGUGU
693453	MMP0702	0.49999	0.207864	0.631216	4	UUUUUCAUCUAUUUUUCCGCUUUUAAUUUUUGUAGU
694390	MMP0704	0.503936	0.383243	0.804311	2	UAAAAAAGAAUAACUUAAAUUUUUUAUUUUUAUCCC
696379	MMP0706	0.488361	0.179482	0.623557	2	UUCGGGAACUAACUACUAAAAAAUUUUUUUUGAUUC
700044	MMP0708	0.691582	0.383174	0.500008	1	AAAAUAACCAAAAACUAUUAAUAUAUUUUUUAUGAG
701013	MMP0709	0.754716	0.534957	0.527444	3	ACUUAAAAUUUUUCUUCUUUUUUAACAUUUUAAUAA
705852	MMP0712	0.574986	0.0645139	0.454325	2	CUUAAAUAAAUUCACUUAUUUUAAAUUUUUUCAGGU
708589	MMP0714	0.342096	0.402772	1.1016	0	GAUAUCAUGAUUUGGAAUGAAACUAUUGAAUGCAUG
710357	MMP0716	0.648777	0.438847	0.625895	3	AUUUUUAAAGUUUAUUUCUUUUUCUUCUUUUAAAAA
711666	MMP0718	0.509137	0.151898	0.578778	2	AAAGGAUAAGCCUUUCUUUUCCAAAAUUUUUACUUU
712043	MMP0719	0.726561	0.519998	0.569663	2	AACAUUAUUAUUUUUUAACAAAUACUUUUUUAUGUU
713955	MMP0720	0.698402	0.345452	0.460774	2	CUCCUAAAAUCCAUAUUAAAUUUUAAUUUUUAAAAA
715766	MMP0723	0.557135	0.367019	0.69965	3	AAUGUUAAUUUUUACUUUUUUUACACCUUUUCAAAA
717489	MMP0727	0.549986	0.243237	0.594656	2	GAAAAAAAUCAAAUAAUCUAUUUUUUAUUUUAAAGU
720905	MMP0729	0.499969	0.484834	0.970621	0	AAACUUGAAAAAAAGAGUUAGUAGCUACUUUAACAA
727868	MMP0734	0.549614	0.249995	0.60051	1	AAAUAUACAUAUAUUGUCUUUAUACUCUUUUCUGAU
728966	MMP0735	0.565213	0.180849	0.530777	2	ACGAUUUUUUCCCAUAUAUCUCCAUCUUUUUCGAAA
730259	MMP0737	0.552687	0.275229	0.617178	4	AAAAGAAAUUUUGUAUUUUAUUUUUUAUUUUCAGUU
730219	MMP0738	0.139738	0.0224036	0.879977	1	AUAAAAUACAAAAUUUCUUUUUUUAAAAUUUAAAAA
732054	MMP0739	0.424989	0.266649	0.784086	1	ACUGAAAAUUCCAUUAAAAUUACAAUUUUUUAGCAU
749651	MMP0756	0.424989	0.0769202	0.622926	2	CUUUUUUAUUCUUUCUUCUUCAAUUUCUUUUAAAUC
752225	MMP0760	0.866652	0.327267	0.198218	3	GAAUAAUUUUUUAAAUUUUAUAACUAUUUUUAGUAA
753043	MMP0761	0.432421	0.366654	0.896161	2	ACAUUGAUUAAAAAUACUCUUUUUUCUUUUUUAGUA
762473	MMP0770	0.481472	0.444428	0.933322	1	UAACUAAAUAUUCCCUUUCAAAGUUUCUUUUAAAAA
776618	MMP0785	0.297289	0.142854	0.819826	3	UUUUAAAAAUUUAAAUUCGUUCAUUUUUUUUGAAAU
781014	MMP0788	0.59998	0.703678	1.34995	1	CAUUUAUAUUCUCUAUUUAAUUCUAUUUUUUGAUAU
783842	MMP0790	0.857082	0.583285	0.342964	2	AACUUCUAAUUUAUUUAAUUUCUUUUUUUUCGAAAC
785777	MMP0792	0.545405	0.190467	0.561552	0	GGGACAAUCCCCCUUACUAACACUAAAUACCCCGAA
790639	MMP0798	0.91659	0.39992	0.138998	2	UAAAUUAAUAAUACUAUUUUUUAAAUUUUUAAAACA
792227	MMP0799	0.818145	0.749983	0.727372	2	GAACGGACUAGUCAAAAACUAAUUUUUUUUUAACUA
802422	MMP0809	0.769221	0.49397	0.456058	3	UUUUAAAAUUCAACUAUUCUUUUUAUUUUUCAAUCC
803062	MMP0811	0.361101	0.0833316	0.696979	2	CAAAACAUUAUUAUAUUUUCAGUAUCUUUUUUAGUA
803671	MMP0812	0.897413	0.63264	0.279255	3	UUAACUUAUUUUUCUUUUUUUACAAUAUUUUGGAAU
807392	MMP0814	0.431808	0.66128	1.67746	3	AAAAAUAAAAUUUUCUUUUUUUCUGAUUUUUAACAU
811193	MMP0816	0.666652	0.517848	0.691375	2	AUUUCGAUUCUAUUUUUUAUUUAAAAUUUUUAAUAU
821455	MMP0826	0.291337	0.119791	0.805108	2	CUUUAACAUUUUUGACCUCAACUAUUUUUUUAUAUU
822551	MMP0827	0.781226	0.428541	0.382835	2	UUAAAUCUAAUAUCUUCUUUUUUAGAUUUUUCAAGC
833825	MMP0839	0.184208	0.0558654	0.864063	2	UUAAUCUUUCAUUUAGUAUAAUUUUAUUUUUAUGAA
836690	MMP0841	0.705841	0.574847	0.69189	2	AAAUCUUAAAUUCUUUUUUUAAUAUAUUUUUAAGUA
837473	MMP0843	0.599983	0.171423	0.482776	1	AAUUAAUAAACUUUAUAAUUUAUCUUUUUUUAAAUA
838283	MMP0844	0.567552	0.263734	0.587352	2	AAUACAUUUAUUCAUCUUUUCAUAUUUUUUUAGCUG
839198	MMP0846	0.62498	0.347823	0.575027	2	UAGAUUAUCUUUUUUUAAUUUUUAAUUUAUUCGGGA
842730	MMP0850	0.187494	0	0.812506	2	ACGCCGAUUAUGGUAACAGGCGCUUUUGAAUAUUUU
842577	MMP0851	0.327581	0.136362	0.77859	1	AAAAAUAAAAAAAAUAAAUCCGCUAUUUUUUUAAUU
845689	MMP0855	0.499979	0.333296	0.74999	1	AAACCCCAAAAUUACCCUUUAAAAAUUUUUUAGGAG
851427	MMP0859	0.594579	0.333306	0.608107	2	CUUCGGAGCUGCCACACAUUUUCUUAUUUUUGAAAU
851685	MMP0860	0.399987	0.272702	0.82499	1	CGCCUAAAUUAUUUAUUAAUUAUCACAUUUUAGUUA
854396	MMP0862	0.489351	0.123152	0.582369	4	UUUCAACUCUUUUAAUUUUUUAAUUUUUUUUAAUCA
856184	MMP0865	0.647051	0.392738	0.581214	5	UUUUGCUUUUUUUAUUUUUUAUUUUCUUUUUAAAAA
857768	MMP0866	0.678082	0.415896	0.551132	2	UAAAUAUCAUUUAUGAAACUUCUUUUUUUUUGAAAA
858697	MMP0867	0.599301	0.492273	0.789201	0	CCCGUAACCUCGUGGGAUCUAAAAUAUAAUAAAAAG
862608	MMP0870	0.882301	0.357117	0.18308	1	UAAAUAAUAUUUAUUUAAGUUUAAUUUUUUUAAGUC
864871	MMP0872	0.284311	0.199998	0.894609	3	CUUUUACGUAUUAGUUCUUUUUUCUUUUUUUAAAAU
866621	MMP0874	0.424241	0.279568	0.799187	3	AUAAUUAACUUUUUUGAAUUUUUAAUUUUUUCAAAU
869581	MMP0875	0.340418	0.242417	0.87064	1	UAUCAACCCAUUCUUCUGUAAUAUAUUUUUCAUAAA
869511	MMP0876	0.396219	0.222216	0.776284	1	UAGAAAAAAUUAAAAAAUAAUUUACUUUUUUAAAUC
872077	MMP0878	0.617975	0.477847	0.731633	0	ACAUCCAUAAUGUACACCCCCCAGUGACAUUAUGUA
872168	MMP0879	0.64583	0.285713	0.495837	1	AUAAUCCAAAAUAUCUAUUAUAUCCUUUUUUACGGA
874919	MMP0881	0.65216	0.166661	0.417406	2	AUAAAUUUUAAUUUAAUUAUUCAUUUAUUUUGAUGU
876268	MMP0883	0.442305	0.143835	0.651387	1	AUUAUCAAUAUAUUCGUUAUUUCCAAUUUUUAGAAC
879262	MMP0886	0.229504	0	0.770496	2	AUUGAAUGUUCAUCCAAAUUUUGACAUUUUUUGACU
880165	MMP0887	0.698621	0.571428	0.703217	2	AAUAUUUGUAUUAUUUUCUCCUAUUUUUUUCAAAAU
880606	MMP0888	0.73604	0.553385	0.591024	4	AAAUUUUUGAUUUGUUUUUUUUCAAUUUUUUAAAAU
880874	MMP0889	0.259256	0.186045	0.910055	1	UUGCAGCACCAUUUUUAGCUUCAGGGGACCCCGAUG
884164	MMP0890	0.838223	0.921736	2.06708	0	UUAAAUCAGUGAAAUAUUCUUUAAUUAGAUAUAAAG
884855	MMP0891	0.277773	0.134327	0.834295	2	UUUCAUUUAAUUAGUUCUUUUUUCAAUUUUUAAAAG
888137	MMP0894	0.305803	0.294999	0.984676	1	UUUGAAUAAUUCUUUAAAAUAUCUCUUUUUUAAAUU
888954	MMP0895	0.266658	0.170587	0.88417	2	CUAAAUUUGCAGCCUAUCUUUUUUAUUUUUUGAUAC
891504	MMP0897	0.644225	0.0661763	0.380988	3	AAAAUUACUAUUUUUUAAAUUUUUAAUUUUACAAAA
891507	MMP0898	0.67796	0.619998	0.847469	3	UUAAAAUAGAUAUUUUCUUUUUUAGCUUUUUUGUAA
896196	MMP0901	0.43055	0.0669144	0.610287	2	UUUUAAAGCCACCUACAAGUCUUUUUACUUUAAAUC
897337	MMP0902	0.579539	0.188138	0.517898	2	UCCUACUAUUUUGAAUAUUUAUUUACAUUUUAAAAU
898246	MMP0904	0.179999	0.113474	0.924961	2	UUAGGAGGAUUAUUUUUUAAUCGCUUAUUUUAAAUA
902076	MMP0908	0.627653	0.13793	0.431922	1	UUCCGUAACGUGCGCCCUUGUAGCUUCUUUUGGAUC
902452	MMP0909	0.224998	0.165876	0.929121	0	AAUUAUUACAUUCCUAAAAUUUCCCUAUCUUCGGUA
902396	MMP0910	0.348479	0.173076	0.787884	2	UAAUUUAAAUUAUUUUUUUAAAUCAUUUUUUAAGUA
902878	MMP0911	0.589033	0.348016	0.630333	1	GAAAUUAUAAUACAUUCAUAAUUUAUUUUUUAAUUA
903510	MMP0912	0.874982	0.391296	0.205384	3	UCUAUUUUUCAUUAAAGUUUUUUUAAUUUUUAACAA
905662	MMP0915	0.178571	0.0849798	0.897717	0	UUUAGGUAGUAUCAUCGGCACCGUUGAUGAUAUCGU
905854	MMP0916	0.770491	0.585097	0.553162	1	UAAAGCUUAAAUUAUUUCUCAUACUAUUUUUAAAAA
906792	MMP0917	0.213269	0.107003	0.881001	2	CUUAAAAAAAAAGCUUAAAAUUUUAUUUUUUCAAUU
908338	MMP0919	0.787867	0.47706	0.405655	1	AAUAUUAAUAUUAAUAAAAAUUACUUUUUUUAAAGA
909193	MMP0920	0.591662	0.224636	0.526641	2	AGGAACUUAAAUUUUUAAUUUAACUUUUUUUAGUGA
912682	MMP0923	0.613325	0.216666	0.493627	1	CGCUGUGUAAACAGCGCAUUUUUCCUUUCUCAUGAU
919458	MMP0929	0.346147	0.107526	0.73263	3	AAGUAAUUUUUUUAAUUUAUUUUUAAUUUUUGAUAA
920275	MMP0931	0.855546	0.430767	0.253769	3	AGUUUUAUUCUUACACGACUUUUUAUUUUUUCAGAU
921639	MMP0933	0.499958	0.343134	0.761254	1	AAUUGUUUCCCUAAUUGAGAGGUUUUACCAUGAAGU
922046	MMP0934	0.382342	0.26027	0.834978	1	GUAUUCUAAAAAUAACUUUAAACUUGUUUUUAUUUA
925587	MMP0937	0.349997	0.176469	0.789288	2	UAUUUAUCCAUACUUUUUUAAUUUUUUAUUUAAUUA
925507	MMP0938	0.336731	0.213872	0.843716	1	GUUAUCUGAAUACAUCUUCUUCUUUUUUUCUGAUUA
926374	MMP0939	0.423721	0.170211	0.694488	1	CAAAAAUAAUUAAAACACUUAUUUAAUUUUUACGGG
928961	MMP0942	0.380934	0.0666644	0.663283	2	AACCCCCGAAUAAUUUUAAAAUUAAUUUAUUUUAAU
933263	MMP0946	0.340908	0.128491	0.756265	3	AUGGAUAAAUUUUAUCUUUUUUUAAAUUUUUAAAAU
934851	MMP0947	0.421868	0.0416646	0.603266	2	UUAAAAAUUUGAUUUUGACUCUUUAUUUUUUAGAUU
936427	MMP0948	0.687896	0.389066	0.510864	3	UAUUACAUAGUUAUUUUUUAAAUUUUAUUUUCAGGU
937897	MMP0949	0.46268	0.68551	1.70855	0	UGACUCCAAAAAAGAAGAUAGUGUAAACGCUGUAUC
940211	MMP0952	0.289346	0.299784	1.01491	1	AUUUGUCUGAUUAUAACUUUUUUUAAAUAUUAAUGC
941792	MMP0954	0.454525	0.11538	0.616621	5	AUUUUUCUUUUUUUUUCAUUUUGAAUUUUUUAAAUC
943739	MMP0955	0.388233	0.406972	1.0316	2	AAUUAUUUAAACUGCUUUUUUCAAUUAUUUUAUUAU
946332	MMP0956	0.483603	0.187968	0.635933	2	AAUUUCUUUUUUACUAUUUUUUCAACUAUUUGUUUA
947236	MMP0959	0.65515	0.356318	0.535746	1	UGUUAAUCAUGAAACAUUUCUUAAAUUUUUUAGUAG
951131	MMP0961	0.731332	0.471541	0.508398	2	AGCAGUAUAAUUUAUAACUAUUUUCAUUUUUAACGG
952100	MMP0963	0.807173	0.563692	0.441952	2	GCGAAUAAUUAAAAAAUCUUUUUUAUUUUUUGAAAA
952482	MMP0964	0.156378	0.0444439	0.88286	3	UCUUAUAACUUUUCUGAAUUUUAAAAUUUUUAUAUU
952488	MMP0965	0.469387	0.30337	0.761685	2	AGUUCAUUAACUAAAUUAUUUUUCUUUUUUUAAUAU
952990	MMP0966	0.124998	0.0740732	0.945001	0	ACAGGGUUUCAAAAUAUGUGUUAGAUCACUACGAAA
954739	MMP0967	0.392843	0.145452	0.7105	0	AAAAUGUUCAAAAAAAUGGAGAUAAUGCCUUAAAAG
956341	MMP0969	0.699995	0.315786	0.438467	2	UUGAUUUAAAAUAAUUUACUUUUUUAUUUUUAAGGU
959482	MMP0971	0.449578	0.231526	0.716253	2	AAAACAUUUUUAAUAACUAUAUUCUUUUUUUAAAAU
959483	MMP0972	0.366409	0.147239	0.742987	3	AUACUAUAAUUUUGAAUAAUUUUUUAAUUUUAAAAA
961509	MMP0975	0.860445	0.562465	0.318957	3	UUUAUUAUUUUUUUAUUUUUAAUUUAUUUUUAAUUU
964026	MMP0978	0.170542	0	0.829458	3	AUUUUUUAAUUUUUAAGAUUCAUUAUUUUUUCUGAA
964320	MMP0979	0.472967	0.145452	0.616739	2	GGGAUGAAUAACAUCCUUUUUUAAUUUUAUUGUAUU
969998	MMP0985	0.29999	-0.0399983	0.673088	0	GAUGGAGAUAGAACAACCCCGUGGCAACCAACUGUA
972494	MMP0986	0.370357	0.444435	1.13334	2	UAUUCAAAACUCCUUUUUUUAAUUAAAUUUUGGGCU
975233	MMP0989	0.553393	0.319584	0.656374	5	CUACUUUUUUUUAAAUUAUUUUUUUUAUUUUGGAAC
981162	MMP0992	0.511139	0.496527	0.970977	1	AUGAGCCAAUUUUAUGAUCUGCUGAUGCCUUUCUUU
982773	MMP0997	0.59998	0.166661	0.480021	1	CAGGUGCGGAACUUUUUUACCGCAUUCCUUUAAAAA
984217	MMP0998	0.719993	0.499996	0.56001	2	AGAAUAAAAUAAAUAUUUCUUUUUUAAUUUUAAACG
984238	MMP0999	0.377769	0.173909	0.753223	2	UGAAUAACCAUUAAAUAAAUUUUAAAUUUUUAAAAA
986584	MMP1001	0.241375	0	0.758625	3	UCGCAAUUAAUUUUUAGUUAUUUUCUUUUUUCGUAU
986487	MMP1002	0.177774	0.193542	1.01955	0	CCUUUGUUUGCUCUUUAAAAUCUUACUUUCUGUUUC
992870	MMP1009	0.279659	0.236841	0.943894	0	AAUCACUGUGUAAUUUGUUAGUGGACGCUAUAGUCC
995294	MMP1011	0.643827	0.399989	0.593611	3	UUAUAACUUUUUUAGAUUUUUAUUUAUUUUUAAAAU
997109	MMP1012	0.684193	0.368402	0.500013	2	AAAAUAUCUGUUCCUUACUUUUUUAUUUUUUAAAGA
1001411	MMP1013	0.687493	0.260866	0.422802	3	UAAAUUUUUUAUUAACUUAUUUUCUUAUUUUGAGGA
1002514	MMP1014	0.605258	0.522165	0.826105	3	AAUUUAAUUUAUUUUUUUUAAAUAUUCUUUUGUGUU
1003004	MMP1015	0.301526	0.233449	0.91119	0	UUAAUUCCAUGAAUAUCAAUAUACUCUUCUUAACCC
1004378	MMP1016	0.493112	0.373332	0.808863	2	GGAGUAAAUUCUCUUUUUUAUUUAUUUUUUUAAAAA
1004298	MMP1017	0.278625	0.219268	0.923974	1	CGGAAAAUUCUUCAGCCAUUAUUUCUUUUUUACCAA
1007471	MMP1018	0.475243	0.217947	0.671	2	UAAACCAUACCCUUACUUUUUUUAAACUUUUAAAAC
1008318	MMP1019	0.551705	0.237284	0.587761	1	AAUAUUAAAAAUAUUAAUUAUUCUUUUUUUCGAUUA
1009388	MMP1021	0.646546	0.358023	0.55057	4	AAAUUUUUUAAUUUUCUAUUUUUUAAUUUUAAAUGU
1012906	MMP1024	0.588201	0.440363	0.735833	4	GUCUUUUUUAAUUUUUGUUUUACCAUUUUUUCAGAU
1015705	MMP1026	0.318177	0.0869556	0.746758	2	UAUCUUUUUUUAUCUUUAAUUUUUAAAUUCUACUUA
1022022	MMP1029	0.287034	0.0798717	0.774855	2	UCUUUUAAAACAUUAAAAUUCUAUCUUUUUUCAGAU
1022041	MMP1030	0.526312	0.267108	0.646326	2	AUUUCUAUUUUUAGAACUUUUUUUAAUUUAUGAUCU
1022731	MMP1031	0.540144	0.245398	0.609402	3	CUAUAUAUAUUUUAACUUUUUUAAUUGUUUUAAUAU
1023445	MMP1032	0.57281	0.34228	0.649501	2	UUAAAACAGCACUAACUUUUUUUAUUUUUUUCGAAU
1028494	MMP1033	0.448971	0.343278	0.839061	1	AUUAAGACAAAAACACUAAUUAUCUCUUUUUGGUAA
1030479	MMP1036	0.911013	0.64727	0.252281	2	UAUUUCAAAUUCUUAUUCUUUUUUUAAUUUUGGCAA
1031018	MMP1037	0.470561	0.357891	0.824532	2	AAAUAAAAUUUAUUUUCCUUAUCAAUAUUUUAUGAA
1031830	MMP1038	0.154205	0.226221	1.09307	0	AAAAGUGGAUCCUGUCAUUAGACAACUCCAUGAAAG
1033970	MMP1039	0.133332	0.0367648	0.899747	0	AGGUAUCGGUGCAGGUAUCACUGGUGCUAGCGGUGC
1034580	MMP1040	0.173075	0.0719421	0.891027	0	CCCAGGGUUUCUAAAUACUUUAAAUCCAAUUCCGAA
1035299	MMP1041	0.370368	0.249999	0.839508	0	UAUUCAUGACUUUAUUUGUACUUGCAGGAAUCGCUA
1036784	MMP1043	0.399995	0.381816	0.970592	0	UAUCCGGUCCGGUUGUUGUUGCCGAAGGCAUGAAAG
1038503	MMP1044	0.537032	0.247523	0.615259	1	GUGCUUUAAUCAAAUAACCUAAUUUAAUUUUAAACU
1040076	MMP1045	0.183906	0.17361	0.987541	1	CAGAAAAGAGACGCCCUUAUGAUGGAGUUUUUUGAA
1040729	MMP1046	0.138887	0.034722	0.892088	1	AGAAAUAGUUGGUCAAAAAGUUCCAGUUUUUGCAGC
1041025	MMP1047	0.879331	0.705609	0.409894	3	AUACCAUCAAUACUAACUUUUUUUUACUUUUCAAUA
1041635	MMP1048	0.153843	0.104711	0.945122	0	AUUCCUAUCAGCGUAAUUUAGGUGGUUUAAUGAACG
1041947	MMP1049	0.366924	0.211805	0.803198	2	UUUAACAAAAAAGAAUUUAAUUUUAUUUUUUAAGCC
1041877	MMP1050	0.20502	0.115485	0.898775	1	UAAUUUAUACUUCCGCAGGAUUUCCUUUUUUCAUGA
1044615	MMP1053	0.773532	0.667794	0.681709	2	AUUAGGAUACUAAUUCCUUUUUUCUUUUUUUAAUAA
1047880	MMP1056	0.265057	0.0508462	0.774314	1	AUUUGAAAAAAUUGGAACUUCCCCUUUUUUUGGUAU
1047671	MMP1057	0.147539	0.0499995	0.897327	1	UAUCUCUAUCCACACUGUACAUUUCCAUUUUAGGAA
1053038	MMP1060	0.619018	0.23999	0.501286	1	GAAAAUUCCUACAAAACACUUAAAUCUUUUUCAAAA
1055517	MMP1062	0.317065	0.270263	0.935864	1	UUCUUUACCCUAUUAUCUUUAAAUUCUUUUUAAAAU
1057284	MMP1063	0.579063	0.658205	1.23155	1	UCCCUCUCCAUAAUUCUAAAUAAGAUCUCUUUUCCA
1057130	MMP1064	0.647057	0.272044	0.484841	1	UUAAAUUUAACUUAAUUUUUUUAAAUAAUUUAAAAA
1058878	MMP1066	0.357138	0.0327866	0.664654	1	AAUUAUAUUCAUUACUGGAAUAUCUUUUUUUAAACC
1058785	MMP1067	0.393436	0.184712	0.743988	2	AUCAAAUAAUUUAUUCUUUUUUAAUUUUUUCAGUAA
1060419	MMP1068	0.533316	0.467734	0.876788	4	AAUCUUUUAAAUUUUCUUUUUUAACUUUUUUAAUUG
1061407	MMP1069	0.73912	0.462764	0.485597	2	AAUUUAAUAAAACACGCUUUUUCUUUUUUAUGGUGA
1062378	MMP1070	0.677955	0.588229	0.782099	2	GGAUAUUGUAAUUUAAUUUAUUAUUUUUUUUGGAGG
1063061	MMP1071	0.735835	0.232553	0.344212	2	AAUUAUUUUUUAGUUAAACUUAUAUUUUUUUAAAUC
1065456	MMP1074	0.326665	0.100774	0.748795	2	GAAAAAAGAAACUUCUAUUUUUAUUAUUUUUUAUGG
1065382	MMP1075	0.239724	0.249998	1.0137	3	AAAUUUUAAAAAUUUAAAGUUUUAUAUUUUUAAGUU
1065853	MMP1076	0.318168	0.245278	0.903423	0	UCCGAUCUAAAAGAAGGCCAGCUCCAGCAGUGUGGU
1067044	MMP1077	0.366654	0.129627	0.727672	0	UUGCGGGAAAACCGAUAAUAGAACAUAUUAUCGAAA
1071802	MMP1080	0.327581	0.0357133	0.697323	2	AUAAAGACUUUGAAACUACCUUUUUGUUUUUAUUUC
1074209	MMP1082	0.483855	0.359369	0.805682	0	UUAAAGAUCCAAAUUAUAUAGGUGAUCCUUUAAAUG
1075036	MMP1083	0.209297	0.11111	0.889539	2	AUCCAUAAAUCCAUUUUUUAAAUCAUUUUUUAAAAA
1074943	MMP1084	0.29687	0.0985899	0.780033	2	UAUAAAAUAUAAAUAAUACAAUUUUAUUUUCAAAAG
1076611	MMP1085	0.333315	0.140348	0.77553	2	UGAAAAAUACAUUAUAUAUUUUUAUGAUUUUGACUG
1080850	MMP1088	0.163932	0.0384606	0.86951	0	CUAAUCUAUUAGCCCCUAAACCAUUUGAAUUGAAUA
1082515	MMP1090	0.78332	0.53225	0.463238	2	UAAAAAGAUUUAAUAUUAUUUUUAUUUUUUUCAGGG
1083421	MMP1091	0.718739	0.204078	0.353378	1	GAUUAAAAAAUAUACUUACUACUUUAUUUUUGGUGA
1084450	MMP1092	0.342847	0.190472	0.811772	0	CCGAUACUUUACACGUUAAUGUAAAAGCCAUAUUUA
1085866	MMP1094	0.466274	0.486485	1.03936	2	AAACAAAAAUAAUUCUUUCUUUUUUAUUUUUUUAAU
1089279	MMP1095	0.806439	0.88884	1.74128	1	AUUUAAUUAUUUAAUUUCCAAUUAUUUUUUUAAAAA
1092579	MMP1100	0.759767	0.386751	0.391739	1	AUUCAAUAAUUUAUCAAAUUCUUCUUCUUUUAAACG
1093237	MMP1101	0.424995	0.079997	0.625004	2	CCGAAAUUUAACUUUUUCUUUUUUUAAUUCUGUUGA
1096003	MMP1103	0.477262	0.499993	1.04546	0	AACUCCCAAUAACACUUGCACUAAACGUGCCGUCAA
1096334	MMP1104	0.599988	0.249995	0.533346	2	CUCAAAAUAAACCCUAGUUUUUUUAUAUUUUCAGUA
1097811	MMP1106	0.372447	0.108695	0.704083	1	UAAUUAUUUCAUGUUAAUACAUAUCUCUUUUAAAAA
1097713	MMP1107	0.158939	0.0855262	0.919721	2	AGUAAAAAUUUAACCCUAUUUUCCAGUUUUUCAUAA
1098943	MMP1109	0.321417	0.424834	1.1798	0	GAAUUUGGAUGAUGUAAAUAGUGAACACGAUCUUAU
1100156	MMP1110	0.651148	0.579542	0.829697	2	UUAAUAAAAAAAUAUUUUAAUCGUUUAUUUUAGUGU
1103178	MMP1113	0.666659	0.294113	0.47223	3	CUAAAUAACAUUUAUUUUAAUUUUAUUUUUUAAAGG
1107138	MMP1116	0.824624	0.53061	0.373626	3	AAUUUUAAUUAACCCUAUUUUUUAAUUUUUAGGAUA
1107821	MMP1117	0.171945	0.177303	1.00651	1	AAGGACAGUACCACAACUUCUUACCUGUUUUUUCGC
1107639	MMP1118	0.451217	0.241756	0.723755	3	UUAGAUUUUUUCAAUCUUUUUUUAGCUUUUUCAAAA
1109188	MMP1119	0.333321	0.432093	1.17392	0	UACUCAAACUGACUUAUUUAGUGGUGCCCAUGAGAA
1111108	MMP1120	0.624995	0.0916028	0.41282	3	AUUAAAUGAAAUAUUUUCUUUUACUUCUUUUAAAAC
1110934	MMP1121	0.101447	0	0.898553	1	GAUCCGCCGUGUGAUUCAACGAUUUUUUUACAAACU
1111650	MMP1122	0.734364	0.494315	0.525301	4	UUUUUUUACAUUUUACUUUUUUACAUAUUUUGGAGG
1115700	MMP1124	0.611094	0.380934	0.628214	1	UUAUCAAAGCUAUUUAUUGUUAAAACUUUUAUUAAA
1116920	MMP1126	0.761887	0.294112	0.337325	2	AAAUCAUUUUUAUCUAAUUAAUUACUUUUUUAGAGG
1119114	MMP1127	0.412692	0.233694	0.766415	1	AAUAAUAAAAUUAAAUAUUAAUCUAUUUUUUAAUUG
1119068	MMP1128	0.374992	0.390861	1.02605	3	UUUAAUUUUAUUAUUCAUUUUAAAUUAUUUUGCACG
1119738	MMP1129	0.324673	0.18884	0.832545	3	AGUCGAAUAAAUUAUUUUUUUUAUUUAUUUUAGUUA
1120781	MMP1131	0.648432	0.216559	0.448748	2	UAUUAAAAACUAUUUUUUAAAUAACGUUUUUUAGAU
1122885	MMP1132	0.333315	0.109373	0.748558	1	AGGAGAAAAAAAACUACUUUCUGAUAUUUUAAUGGC
1123942	MMP1133	0.516112	0.301881	0.693131	1	UAAAUAUAAAAUUAUAUAAAUAGAUUCUUUUUAUAA
1125263	MMP1134	0.653834	0.448815	0.628041	2	AAUAAAAUAACUUUUUUUAAACAUUAUUUUUAAAAU
1127283	MMP1136	0.599996	0.181815	0.488892	2	UUAAUUACCUUAUUCUAUUUUUAAAUUUUUAAAAAA
1127283	MMP1137	0.19718	0.0735285	0.866534	3	AAUAAUUUUUCUAAAAUUUUAUUAUUUUUUUAAAAA
1129503	MMP1139	0.876182	0.631572	0.336071	2	AAUAAUUAUUUUUCAUUUUUUUAAAUUAUUUAAAAA
1129976	MMP1140	0.206184	0.0784302	0.861374	1	UCAAAACACUUUCGUCAAUAGUUAUUUUCAGAUCAA
1133540	MMP1142	0.163633	0.107525	0.937132	1	CGACUUCUUUUCCUUCGAUAUGUCUUAAAGCAUCUG
1133349	MMP1143	0.619038	0.377547	0.612034	2	UGGAAAAAUAUCUUCUUUUUUAACUUUUUUUAAGUA
1135588	MMP1146	0.315216	0.156105	0.811456	3	AAAAUUUUAAUUUCUAUUUUUUAAAUAUUUUAAAAA
1137115	MMP1147	0.457873	0.317735	0.794599	1	UAAAAUAAUUAUCUAAACCAUCUUUUUUAUUACUCG
1137307	MMP1148	0.0654197	0.0670728	1.00177	0	AACACAAUAAAGGUUCAAACCAUAUUGUAUGCAGAA
1139105	MMP1149	0.819181	0.63223	0.491663	3	AAACCUUAUUUUUUUACUUUUUUUAAAUUUUAAAGU
1140998	MMP1152	0.687491	0.560807	0.711552	2	CAAAUAAAAAUUCUUUUUUAUUAUUUAUUUUGAACU
1141405	MMP1153	0.559207	0.261534	0.596904	1	AAUAAUAUGUAUAUACUAAUCAAUCUUUUUUAUGCA
1143537	MMP1154	0.307681	0	0.692319	0	CCAUUUGAACAGGCUUCCUGCUGUCCUGCACCGGGA
1144322	MMP1155	0.293098	0.0361446	0.73341	1	AUAAAAUAUUUAAUCCUUAGACGGAGGGGAUUUUAU
1144642	MMP1156	0.891556	0.764036	0.459581	0	AAGCUAUGAAAGUAGUUAGCAAAUUAUAAAUGGGGA
1145337	MMP1158	0.906443	0.821349	0.523686	0	CGGGGGUUUAAAUAUGGAUGGUAAAUUAAGAUGCGA
1146065	MMP1160	0.862294	0.511762	0.282047	1	GACUAUAAUUCAUUCAUUAUUUAAUUUUUUUAGGGG
1146455	MMP1161	0.846542	0.564442	0.352326	2	UUAAAUCUAUUACUUUUAUUUAACUUUUUUUAGGUG
1147989	MMP1163	0.574876	0.409593	0.720051	2	UUAUUAAAUAAUCAAUCUUUUUUAACAUUUUAUUCC
1148476	MMP1164	0.679973	0.605835	0.811912	1	AAAGCGCAGUUAUUAAUUUUGAUGAAAAAUUCGUUA
1151820	MMP1167	0.579539	0.615938	1.09477	1	ACUUUUGAAACAUAUUAAAGGUGAUUAAAUGCUACA
1152655	MMP1168	0.190472	0.160492	0.964289	1	GCAUGUAUCCUACACCAAAAGAAAACCUUUUGAAAG
1153796	MMP1169	0.303367	0.118643	0.790409	2	GUUUUUUACUUUUUUAAAUAUUUAAAGAAUUAAUAA
1155213	MMP1172	0.349982	0.0270263	0.668073	4	UAUUUUUAAAUGAUUUUUACAUUUUCAUUUUAAAUA
1157632	MMP1174	0.849386	0.712293	0.5235	3	UUAAAAGAAUAAUUCUUUUUUUUAUUUUUUUAACUG
1158880	MMP1175	0.566027	0.224485	0.559593	3	ACUUUUUUAGAAUCUUAUUUUUUUAAUAUUUUAAAU
1160136	MMP1177	0.403314	0.204892	0.750447	2	AACCAAUAACUUUCUUUUUUCUUUUUUUAUUCAUUA
1161386	MMP1178	0.812774	0.594016	0.461167	4	AUUUCUUUUUUUUCUUUUUUAAAAUUUUUUUAAAGA
1164157	MMP1180	0.649968	0.357795	0.545048	2	CCAUACCCUUGAAUCACUCUUUUUUAAUUUUGAUUU
1165473	MMP1181	0.413035	0.0952339	0.648748	1	GACCUUAACUAAUAUCAUAUAUUAUUUUUUUAAAAA
1167480	MMP1183	0.682137	0.201813	0.398232	1	AUUCUACAUAUUUCUUUAAAACCAUUUUUUUCAUAA
1170686	MMP1186	0.671777	0.286162	0.459801	1	UAAUUUAUAACCUUAAUAAUUCUCUUUUUUUGGUGA
1171255	MMP1188	0.783066	0.597789	0.539354	3	AUUUUAAAUUUAAACUUUUUUUAAAAUUUUUAGAAU
1171690	MMP1189	0.516945	0.223299	0.621932	2	UCUGAUAAAUACUUUUUUUAUUUCAAUUUUUGAAGU
1172468	MMP1190	0.514849	0.215682	0.618564	2	AAUUAUGUCUUUUUUCAAUAUUUAGAUUUUUAGAUA
1174185	MMP1191	0.668741	0.598151	0.824336	2	UAUAAAUACUAAAUUUUAAUAUCUAUUUUUUAAAAU
1182612	MMP1194	0.897413	0.594579	0.253038	2	AGCAGUAACUUCUUUAUAUUUUACUUUUUUUGUGAA
1183758	MMP1196	0.458324	0.206889	0.682977	2	UUUUCUUAAUCGAAAUUAAUUAUCGUUUUUUUACCG
1184765	MMP1197	0.53842	0.428559	0.807748	0	UUGUUGCAGUUGAUAAUGUAGAUUUAUCUGUAAAUC
1185492	MMP1198	0.449433	0.277774	0.76232	2	AUUUAUAUAUUUUUAAAACAUAUUCUUUUUUAAUGA
1186420	MMP1199	0.627108	0.0833324	0.406791	1	UUAAAAUAAUUACUUUAUAAAAAUCUUUUUUGAUAG
1187868	MMP1200	0.533331	0.536228	1.00625	2	UUUGUAAAUUAAAUUCUUUUUAAACUUUUUUAAAAA
1188060	MMP1201	0.588218	0.166664	0.494137	2	UUAAAAUAUGAAUCAUUUUUUUAAUUUUUUUAGCAC
1190160	MMP1204	0.523797	0.195648	0.592033	2	ACUUACAUUUUUAUCAUAUGUUUAUUAUUUUGUGAU
1194110	MMP1206	0.473	0.415766	0.902037	2	AAAAUCUAAUUACCUUUUUUUAAAUAUUUUUAUUGU
1194695	MMP1207	0.530526	0.374452	0.750501	2	CCGAAUAAAUUAACUCUUUUUUUCUCUUUUAAUUGG
1196091	MMP1208	0.633176	0.280564	0.509877	2	UUAUAACUUUUUUAUUAUUUUUUUAACAUUUGGGUG
1197195	MMP1209	0.479157	0.250995	0.695381	3	UAAUUUAUUUUAAAACUAUUUUUUCAAUUUUAAAUA
1197997	MMP1210	0.321917	0.202733	0.850509	2	UAAAACGAUUAAAAGAAAUGAAAUAAUUUUUUUUGU
1199236	MMP1211	0.290906	0.281937	0.987509	0	AGCAGGAGUUAAAGCAAUUAGUGAUGCAAACGUUGA
1200457	MMP1212	0.472101	0.380681	0.852386	0	GCAAGAAGUGUCUGCCCAGAAUGCAGAAGAAAAGGA
1200755	MMP1213	0.674319	0.492904	0.642246	2	AACAAUAAAUAAUUACAUUUUUUAUUUUUUUAAUUA
1201505	MMP1215	0.638871	0.213739	0.459299	3	UAAAUUUUUAAUACUUUUUUUAAAGAUUUUUAAUAU
1203126	MMP1216	0.39999	0.3401	0.909244	3	AAUAACUCUUAUUUUUCAAUUUUAUUUUUUUAACAA
1204293	MMP1217	0.433326	0.0561791	0.600404	3	AUACUUUAAUUUUUUUAUUCAUUUUUAUUUUAGUUU
1208479	MMP1220	0.352934	0.187498	0.796387	3	ACAGUGAUUAAUCUCUUUUAAAUUUUAUUUUAAGUC
1210141	MMP1221	0.580626	0.124997	0.479282	2	UACUUUAAAAUAGAUUUUAUUAGUCUUUUUUAGAUA
1211865	MMP1222	0.520421	0.294715	0.679979	3	UUAAAAAUAAAUUUUAAUAUUUUCUUUUUUCAUUAA
1214473	MMP1224	0.296482	0.185185	0.863408	1	UUAAUUACCAUUAUCCAAUUACUUUUUUAUUCAACU
1215423	MMP1225	0.32257	0.014286	0.687248	1	AGGGGUUAUCCAUAUCCCCUUUUUCAUUUAUAAAUU
1218359	MMP1229	0.743571	0.227262	0.331845	2	UAUAUGAUAAACCCAUAUUCUUUUAAUUUUUAAGAA
1219448	MMP1230	0.629606	0.0322568	0.38274	2	AAUUAGCUAAAUAAUUAAUUUUCUUCUUUUUAGGGU
1219962	MMP1231	0.499992	0.339619	0.757151	2	AAAUCUCUUUUAAAAUUUCUUCAAUUUUUUUAAGGU
1220860	MMP1233	0.270263	0.199987	0.912156	2	AUAGAUUUUAAAUCAUAAAAUUCUAUUUUUUAUUAC
1222816	MMP1235	0.374984	0.148142	0.733709	2	CACUAAAUCAUUCUAAUUUAUUUUAAUUUUUAAAAA
1223853	MMP1237	0.791033	0.462361	0.388675	2	UAAAAACAAAUACUAUUUUUAAAAUUAUUUUAGAAA
1227288	MMP1241	0.328569	0.288887	0.944198	3	UUUUCUUCCAAAAGGCAUUUUUCUAUUUUUUCUAAA
1227150	MMP1242	0.13253	0.0350871	0.899014	3	UUUAUUUUAUUCUUCUUUUACGUAAUAUUUUACCAU
1230504	MMP1245	0.18181	-0.0333322	0.791798	0	AAAAGCUUUCUCAAAAUUAAUGAAAUAAUUUGAAUA
1230857	MMP1246	0.590882	0.529404	0.869361	0	CGGGACGAACCAUCUGGCAAGGCGAAGCCAUCGAAG
1231300	MMP1247	0.112674	0.0967735	0.982395	0	CGGAGAAAAGAUGGAUAUCUGCGUAAAAGACGGAAA
1232941	MMP1248	0.549986	0.272723	0.618765	1	AAUACAAUAAGGAAAUCUUAUUUAAUCUUUUUAAGG
1233789	MMP1249	0.827319	0.670807	0.524559	2	AAAACUUAAUCUAAUACUUUUUUUAAUUUUUGAAAU
1235158	MMP1251	0.303021	0.2093	0.88147	0	UAAGGAAAACGUCAGAAGGAUAUGUGUUGCGGAUCC
1235926	MMP1252	0.453331	0.256603	0.735365	3	AUUACUAACUUUUUUCAUAUUUUUAUUUUUCAAUGG
1239758	MMP1255	0.582157	0.351463	0.644286	2	UUUUGACAUAAAUUAAUUUAGAUCAUUUUUUUAAUU
1240222	MMP1257	0.342096	0.0606059	0.700349	2	CCUUUAAAUACCACGCAGGUGCUUUUCUUUUAGACC
1242053	MMP1259	0.544376	0.282757	0.635244	2	AUCGGCAUCUCAGCCUUUUUUAAACUUUUUUAUUGA
1243622	MMP1260	0.724876	0.610644	0.706613	2	AAUAAUUUUCAUAAACUUUCUUUUUUUAUUUAAUUA
1244874	MMP1261	0.396737	0.263735	0.819355	4	UAUUUCUUUUUUUUAAAUUUUUAAACUUUUUAAAAU
1248348	MMP1265	0.677398	0.260858	0.436455	4	UUUUUAAGUAUUUUUAACUUUUAAAUAUUUUAUAUU
1253841	MMP1270	0.589033	0.369858	0.652181	2	UUAGAUUUCUUUUAAAAAUUCUAAUUCUUUUGAAGU
1255273	MMP1271	0.415092	0.179243	0.712645	2	UUUAAAUUAACAAAUAUUUUUUAAAUAUUUUAAUUU
1257655	MMP1273	0.433319	0.399993	0.944458	0	UACUUCCCAAUGGUUGGAAGGAAGUUUGUUCAGGCA
1258114	MMP1274	0.753621	0.449149	0.447269	2	UAAUUAACUAUCAUAAAAAAUUAUUUUUUUUAAGAU
1261173	MMP1276	0.279408	0.0754703	0.779415	2	AAUUUAUUCAAUUUUUACAAAAUUAAUUUUUCCGUC
1261129	MMP1277	0.285709	0.357136	1.11111	2	UAAAAAUUGAAUAAAUUACUUUUUUGUUUUUAGUCU
1263588	MMP1280	0.386307	0.538133	1.32872	0	UAUUCUAUCCAAGCUAAACCACGGGCCCAAAAUUAU
1264719	MMP1281	0.272725	0.148935	0.854547	1	AAUAAUUCUUAAUUUACGUUAAUUAUUUUUUUAAAC
1264637	MMP1282	0.32432	0.170211	0.81428	2	UUUAAAUUAUAUCUUUAAUUUUUACUUUUUUGAUAG
1268118	MMP1284	0.461521	0.32352	0.796001	2	CUCGACAUUAAUAAACCUGUUUUCUUCUUUUGUAAA
1270735	MMP1286	0.266661	0.140623	0.853338	1	AGGAUGAACUCAUCCAAUUACACCAGCUUUUGGUUU
1271019	MMP1287	0.671224	0.0909074	0.361653	3	UAAUAUUUUUAUUUUUGUUUAAUUUACUUUUCAGGU
1272333	MMP1289	0.559721	0.109251	0.494279	3	UUUCCUAUUUUUUUUCAAAAUAAAAAUUUUUAAAAA
1272836	MMP1290	0.189472	0.107526	0.908182	0	CAGAACUAUAGAAAGAAGAUCGUACACAAGAAAAGA
1274980	MMP1292	0.47824	0	0.52176	1	ACAUAUUAUAUACUAUUAAUAACACUAUUUUCAUGU
1276924	MMP1293	0.238084	0.179997	0.929162	3	AUAAGACUUAAUUUUGAUUUUUACAUUUUUUAUGUC
1279853	MMP1294	0.461521	0.148142	0.632123	2	CACUACUUUUAAAUAACCAUAACUAUUUUUCAGGAG
1281192	MMP1295	0.424229	0.0869531	0.630603	2	UACAUUAUAACUUCCAAAUAAUUUUAUUUUUGAGAG
1282448	MMP1297	0.841154	0.69627	0.522983	3	AAUUUUGUAACCCCCUAAUUCUUUUUCUUUUGAAAU
1283688	MMP1298	0.417644	0.482104	1.12447	1	GUGCAGUUACUGCACUCUUCAAAUAUCUUUUAGACA
1285996	MMP1299	0.434147	0.449152	1.02724	1	AUAAUAUACUUAACUAUAUCUACCAUUUUUUGUAUU
1286618	MMP1300	0.133986	0.0195531	0.883285	0	UAUAUGGAAUCGGUGUCCGAAAAAUCUAAAAAUACA
1287162	MMP1301	0.452623	0.447091	0.989995	1	AAAGAUGAAGACUACUAACUUCAUCUUUUUGGUGUU
1288231	MMP1302	0.64652	0.426842	0.616723	4	AAUCUUAAUUUUCUACUUUUAUUUUAUUUUUAAAUA
1288685	MMP1303	0.249996	0.0796456	0.814908	2	AAUUAUUAUAUUAAUUUUUUUAAAAUUUUUUAAAGG
1292642	MMP1306	0.406591	0.351693	0.915321	4	AAUUUAAAUUUUCUUAUUUUUUUUAUUUUUAAUUAA
1294651	MMP1308	0.744768	0.647901	0.724886	4	UCUUUUAAUUUAUUUUAUUUCGAUUUUUUUUAUAAA
1296028	MMP1310	0.504128	0.487105	0.966809	4	UUUAAUUUUAUUAUUUUUUUAACUUUUUUUUGGUGA
1298494	MMP1314	0.574995	0.382351	0.688101	1	AAGAAAAAAAUUAAUCAAAUUAACUUUUUUUGGCGU
1301038	MMP1315	0.468075	0.313719	0.775084	1	AAUUGUUUAAAUUUCUAAAAUACUAAUUUUUAUGGU
1303441	MMP1318	0.478256	0.180553	0.636703	3	AAAAACUCUUUUUUUUAUUUUUUAAUUACUUAAAUC
1306378	MMP1319	0.359724	0.254826	0.859231	0	AAAAUAAUAAAAUAAUAAAAAGGUGAAAAAAUGGGA
1307389	MMP1321	0.155999	0.10574	0.943798	1	AAAAUGGAAUUAAAAGCCCCUUUAUCUUUUUCCAGU
1307920	MMP1322	0.461536	0.227799	0.69731	0	GAAAAUUAAUUACUCUUUCUUCCAAAUUAUUGGAAA
1308931	MMP1324	0.457361	0.322033	0.800392	0	UGGAACCUGUUAUCUUAGCAGGCGAAGCUUUAAGCA
1309196	MMP1325	0.800319	0.436864	0.354588	2	AUAAUUAUUUUUCUUUCCCUUUACGUUUUUUAGGUG
1309486	MMP1326	0.0123964	0.0260711	1.01404	0	CCGUGGGGUAGCCUGGCCAUCCUGUGCGUCUGGGGG
1309756	MMP1327	0.753941	0.454975	0.451464	2	CUAAAAAUUAAAUAACUAUUUUAAAUCUUUUGGGGG
1310761	MMP1328	0.148436	0.0220996	0.870808	0	AAAAAAAAUGAGGGGAUAAAAUGAGUGUUGUAAUUG
1310985	MMP1329	0.277566	0.192031	0.894136	2	UUAAUUUAACUUAUUCAGAAUUUUCUUUUUUGACUC
1310927	MMP1330	0.141777	0.061551	0.914512	1	UAAAAAAAUAAUUAAUAUUUAGUCUUCUUUUACUGU
1311307	MMP1331	0.476168	0.156248	0.620837	3	UCCUUUUUAAUGAUCUUUUUUUAAAAUUUUUAUCGA
1311817	MMP1332	0.636335	0.0909074	0.400031	2	AGUUUUAAAUACGAAUUAAAUUAUAUUUUUUAAAAA
1314345	MMP1333	0.596765	0.867672	3.04725	0	CACCUGUAUGUUAUCUACAAGCAAGUGCACUAUAAA
1315813	MMP1334	0.247421	0.0277774	0.77408	3	UCCAAUUACACCAAUUUUUUUUAGUUCUUUUAACAA
1318761	MMP1337	0.59848	0.378943	0.646511	1	AAUUAAGAAAUAUUUCAAAAAUACUUUUUUUAAAUU
1319076	MMP1338	0.531904	0.363628	0.73557	2	AAAAUAUUCAUAUUAUUCUUUUUUAGCUUUUAUAAU
1324381	MMP1343	0.416649	0.161971	0.696098	2	CCAAUAUCGAUCAAGUCUUUUUUUAGUUUUUUAUCG
1325669	MMP1345	0.254897	0.0758923	0.806295	1	ACCAAAAUAACUCAAAUGAAACUUUAUUUUUAAAUA
1327423	MMP1347	0.705983	0.578443	0.697455	2	AAUUACUUUAACAAUUUUUUUACUUUUCUUUACUAC
1327814	MMP1348	0.285701	0.0588226	0.758942	2	UAAUAUAAUUCUUUUUUUUAAAUUAUUUAUUACUUG
1328933	MMP1349	0.406773	0.272724	0.815683	2	CCAAUGCCUUAAAUUUAACUAUUUUUAUUUUGUGAA
1331691	MMP1352	0.188775	0.0253164	0.832296	3	AAAAUCUUUUAAUUAACUUUUUUAAAUUUUUAAAUU
1335532	MMP1356	0.333329	0.0970867	0.738356	1	AUUCAUUCUUCACAAAUCUUUUUUAAUUCUUCAAAG
1336794	MMP1358	0.792445	0.431504	0.365094	2	UUCAAUUAAAUUUAAUUUUUUACUGUUUUUUAGGUG
1339300	MMP1360	0.309732	0.0640394	0.737497	1	AACUGCUGGUUAAUACCUGCUAAAUAUUUUUAAAAU
1341014	MMP1361	0.205877	0.147268	0.931269	0	ACAGAAGAAGUGGAAAAUUAUCGCCAAGCACGUCAA
1342751	MMP1362	0.316452	0.175122	0.828667	1	ACAGAGCAUAACUUAAAUUAUAUUAUUUUUUAUUAA
1345468	MMP1363	0.173909	0.0518136	0.871232	1	AGAUAUGAAAAUUAAUUAUUUUCAAUUUCUUAAAUU
1346681	MMP1364	0.745041	0.587301	0.617784	2	AUUAUAAUUUAAUACUUUUUUAAUUAUUUUUAAGAU
1347223	MMP1365	0.243241	0.230088	0.982916	0	UGAGAAUUAAACUUAAUACAGAAGAUAUCAUGAGAA
1347724	MMP1366	0.104166	0.0528168	0.945788	1	AAGCUGAAGAAAACCAAUAAGGUGAUUUUAUGGCAG
1348255	MMP1367	0.109588	0.0179952	0.906728	0	GGGACAGUGAAACUGUCGCAGUUAAAGACCCAAGUU
1348790	MMP1368	0.440412	0.254789	0.750911	1	AAGAUAAAUUAAAUACUUUUUAUAUCUCUUUAUACA
1351216	MMP1369	0.766374	0.63938	0.647846	0	GCUGGUAAAUCAACAACAGUAGGAAGAUUAUUAUUA
1352446	MMP1370	0.718636	0.532534	0.601892	1	AAAUAAUUUAGCUUAACUUUUUCUUCUUAUUAAACA
1352855	MMP1371	0.669821	0.492733	0.650897	1	AGUUGAGGAUUGCAAUAAAACUUCUUUUUUUCGCAU
1354418	MMP1373	0.608503	0.48532	0.760662	2	UAUCCUAAAUUAAAUCUAAUUUUUAUUUUUUAAAAA
1357301	MMP1375	0.788727	0.164704	0.252932	2	UUUUUAAAUACUACUAUUUUUCAUAAUUAUUAUAAC
1357606	MMP1376	0.833316	0.464782	0.311432	2	GCGAAUAAACUAAUUUAUAUUUUUUAUUUUUGGUGU
1358708	MMP1377	0.512807	0.0294117	0.501956	1	AAAUAAUUAUUUAAAACUUUAAUACUUUUUUUCGGC
1359100	MMP1378	0.445024	0.405061	0.932828	2	AAAUAAAUAAAAUAUUAUUUUUUAUUAUUUUAAAAA
1359048	MMP1379	0.421346	0.120567	0.657985	2	UAUUUAUUUCCACUUAAUUGUUUUAAUUUUUCAUUU
1361103	MMP1380	0.413779	0.0724629	0.632019	0	AUUGUGGAAUGGACCCAUCAGACAACGGUCUUCCAG
1362291	MMP1381	0.725371	0.434387	0.485542	3	ACAUAUUCUCUUUUUUAAUAUUUUAAAUUUUGAUAA
1363848	MMP1382	0.399995	0.180553	0.732207	1	UGGAAUACAGUUUAACCCCUUCAUACCUUUUAAAGG
1364519	MMP1383	0.431997	0.483218	1.09912	0	GAGAAAUUCCUGACGAUGUAGACAUAGUCUUGCUCG
1365171	MMP1384	0.449996	0.468747	1.0353	0	GAAAGCACAAGAUGGAGGUAUCGUUUCUGCCGCAUA
1365954	MMP1385	0.546964	0.498486	0.903337	3	ACUUCUUUUAAACUUUUUUUACUAUUUUUUUAAAUA
1368023	MMP1387	0.319993	0.105262	0.760006	1	CGAGUUUAAAUAAUCCUUAAGUUCUUUUUUUAAAUC
1367960	MMP1388	0.307681	0.0517228	0.730081	2	CUAAUUUUAGAAACUAUUAAUUUAUUAUUUUAGCUU
1369825	MMP1391	0.557889	0.431534	0.777726	3	ACCUUUAAAAUCUUUUUUCUUUUUAUUUUUCAAAAU
1372920	MMP1394	0.685695	0.380934	0.507709	2	AUUUCAAAUCUGCUCCUUUUUUUAAUUUUUCAACAA
1376029	MMP1396	0.714282	0.539818	0.620881	2	AACUAAUUAAACACUUUUUUCAUAUUUUUUUAAAAU
1383297	MMP1399	0.22727	0.152865	0.912169	0	CAAUGCAGAAAUUGCAGCUAGAGAAAAUGCUACAAA
1383730	MMP1401	0.51923	0.261681	0.651169	1	ACUCGUUUAAUUUCACCAAUACUAAUUUUUUAAAUA
1384119	MMP1402	0.159998	0.12605	0.961155	0	CAGAACUUUAAGAAUAUCAAGAAAACAUGCUAUUGA
1384588	MMP1403	0.139343	0.0720334	0.927466	0	CUUUAAAACUAAAUUAGUUAGAGCAGGAUACAGCCA
1385373	MMP1405	0.246073	0.167202	0.905295	1	GCUCAAGCAGAAAAUGCUUAAGCAUAAUUUUAAAUA
1385820	MMP1406	0.160332	0.230089	1.0906	0	AUGUACACCCCCAUGCUCAAAGGGUAGGGACACCCA
1386127	MMP1407	0.21069	0.0846154	0.862272	0	AAUAAAACAGCUCUACUCGUACUAAGCUUCUCAGCU
1386696	MMP1408	0.247572	0.348949	1.15571	0	AUCAUUACCUAACGGAGCUAGACUCGUCUGUGCAGA
1387141	MMP1409	0.261903	0.267573	1.00774	0	ACCAUUACAUUUAAGAAAUAGCGUUAUGUCUGCAAU
1387427	MMP1410	0.295999	0.312859	1.02454	0	AAAAAUUCAAGUAACUAAGAGGUGUGAGCAUGGCAA
1388265	MMP1411	0.143884	0.0751873	0.925718	0	GAAUCCAAAAAGUCACCGUAAACUUCGGUGUAGGUG
1388793	MMP1412	0.713606	0.683812	0.905769	0	AGACAAAAUACGGCCAAGGUUCAAAAGUUUGCAAAA
1389080	MMP1413	0.553689	0.486841	0.869732	0	GAUCAAGGAUACAUUGGAAACUUCGAAUACAUUGAA
1389354	MMP1414	0.0984843	0.0155436	0.91575	0	AUGGAGGUAUUCUUAUGCCAGUUGCAGCUUUAAUAA
1390953	MMP1417	0.12676	0.0189278	0.890088	0	UUAAACAAUGUGACCGCUCAGCUUAUGGCAUACGAU
1391447	MMP1418	0.17213	-0.0212012	0.810683	0	AAAGAAAAUUCAAUACCGAAGCUUGGGAGCCAAAAA
1392117	MMP1419	0.646223	0.663635	1.05176	0	AAAAAGGUGAUUAAAACAUGGCUUACGCAGUUGUAA
1392629	MMP1420	0.140495	0.0050761	0.86389	0	AAAAAAUCACGAAAAAAAGAGGCUCCAGAACCUGCG
1393120	MMP1421	0.808611	0.680161	0.598393	2	UCAUUUAAAUACUCAUUUUUUAAUAUCUUUUAAUGU
1394611	MMP1422	0.655796	0.421985	0.595493	2	AUAAUUAGAAAUAAAAAUUUUUUACUUUUUUAAAAA
1398227	MMP1424	0.694213	0.38267	0.495338	3	AUUUUAAAUAUUAACUUUUUUAAUAUUUUUUGAAAA
1398847	MMP1425	0.24999	0.0294117	0.772738	0	UCUAAAUCUCUCUGGUGAAAUAGAUGAUAUUAAGUG
1400897	MMP1427	0.0412364	0.133136	1.10601	2	AGUUUAUAAACUUUUAAAACAUAUACUUUUUAGAUA
1401108	MMP1428	0.372857	0.178756	0.76365	3	AAAAAAUAAAAUAAGUUUUUUUUGAAUUUUUAAUAU
1401077	MMP1429	0.46126	0.21281	0.684383	2	AAAAUUCAAAAAAAACUUAUUUUAUUUUUUUAAUUA
1403932	MMP1432	0.812731	0.516798	0.387558	2	AUUAUAUAUUAUUAUCCAAGUUUUAUUUUUUAGAUU
1405100	MMP1433	0.769393	0.529801	0.490446	2	AACUAAUUGAAUUUCACAUUCUUUUUUUUCUGGAAA
1406214	MMP1435	0.305239	0.124248	0.793331	2	GUAUAAAUCGAUAAUUCUUUUCAAUUAUUUUGAGAU
1406555	MMP1436	0.428568	0.235631	0.747587	1	AAUAGAUAUCCCAAAAAUUUAAUUAAUUUUUAAGAU
1409048	MMP1437	0.671424	0.311763	0.477417	2	ACCAAUAUCCUAAAACUAUUUUUCUUUUAUUACGAU
1410360	MMP1438	0.814152	0.610014	0.47655	2	AACCUACAAAUCUAUCUUUUUUUAUUUUUUUCAACC
1411745	MMP1439	0.488366	0.278477	0.709103	3	CUAUUUUUGGAUUAAUUUUUCUAUUUUUAUUAGUAA
1413451	MMP1441	0.536839	0.209439	0.585863	1	CAAAAUUGAAAAAAAAUAACUCUUAUUUUUUGAAUA
1413974	MMP1442	0.702018	0.511529	0.61003	3	CAAAUAAAACACAAUUUUCUUUUUUAAUUUUGUAAU
1416664	MMP1445	0.405403	0.180722	0.725757	2	GUUAAUUAAAUAAAAAAAGUUUUAUUUUUUUAAAAU
1418100	MMP1447	0.0652161	0.105262	1.04476	1	AUGGUUUUAUUAAUUAACUACGCAGUAUCUUUGGUU
1419721	MMP1452	0.301881	0.237111	0.915099	1	UUGCAGGGUUUGUCUGCAUAGUUUUAUUCAUCGGUA
1420184	MMP1453	0.272721	0.117646	0.824249	0	GUUGGAAUAAUUUCACUUUAUUCAAUUUCCCGCCAA
1421535	MMP1455	0.162787	0.0384606	0.870701	0	GCUAUAUAGCACUUAUAAUUGGAAUCUUGGGAUACC
1421853	MMP1456	0.199994	-0.0208332	0.78368	1	AUUCAGUAUUUAAUCCAUACAUUCAAAUUUUACUUU
1424071	MMP1461	0.241371	0.283578	1.05891	0	AAAGUCAAAGCAUGAUUUGAGAUGAUAUUAUGAAUG
1428764	MMP1467	0.657287	0.413697	0.584532	1	UAAAAUAGAAAAAAUAUUAAAUUUCUUUUUUGGACA
1429959	MMP1469	0.509086	0.117646	0.556368	3	UUUUUUUAAAAUAUUAUUUUUAUUUUUUUCUAAAGA
1430972	MMP1470	0.712705	0.256917	0.386625	3	UUUUAAAUUAAAUUUUAAAAAUACACAUUUUAAACA
1433053	MMP1472	0.411753	0.186044	0.722702	0	AUGGUACUCUUGAUUAUUAGAGGCGACAGCUACGAA
1436573	MMP1474	0.249999	0.180644	0.915354	2	AAUAAAAUAAAAAAAUCUUUUUUUAUAUUUUUAUUA
1436534	MMP1475	0.354328	0.198472	0.805551	3	AAAAAGAUUUUUUUAUUUUAUUUAUUUUUUUCAAUG
1440709	MMP1479	0.377043	0.130433	0.716399	0	UUAAAAUUUAAUUUAAAUCCCUCAUAUUUAUAAAUC
1442057	MMP1480	0.804729	0.593748	0.480664	1	GAAUAAUAAUCAAUAUUUGUUUCUCUUUUUUAAAAU
1443015	MMP1481	0.362495	0.240382	0.839244	0	GUGCAGAUGGUGCUGCUGGAGACUUGAUCAUGGAAA
1443301	MMP1482	0.169741	0.191234	1.02657	1	GCAAUUUCUUCACUGUUCGUUAGCAUUUUUUCUAAA
1443998	MMP1483	0.512183	0.139532	0.566921	1	AAAAAUUAAAUUCUAACUUUUUUAUACCUUUAAGCA
1445442	MMP1485	0.168477	0.0528635	0.877933	2	GGAAUUUCAAUACCUUCUUUUCCGUAUUUUUCGUAG
1445345	MMP1486	0.502791	0.334599	0.747233	4	AAAAAUAGUUUUUAUAACUUUUUUUUAUUUUAUAUG
1449249	MMP1488	0.161288	0.0384606	0.87226	1	UGCAUUAUUAAUUCUCAUAAUUUUAGCAUUUAAAAU
1449283	MMP1489	0.538456	0.199997	0.576928	3	AGUUCUUUUUUAAUUUUCUUUAUUUUUUUCUAAAAA
1451835	MMP1491	0.373129	0.139999	0.728919	2	AAUAAUCUAAAAAAUCUUUUUCAAUUUUUUCAAAAU
1455271	MMP1493	0.604214	0.358599	0.617065	3	CUUUGAAUAUUAUUUUAUUUUCCUUUCUUUUGUAUA
1455939	MMP1494	0.399995	0.491375	1.17966	3	AAUUUAGAUUAAUUUUUAUUUUUUAUAUUUUGAGCC
1455868	MMP1495	0.156248	0.0166665	0.858053	3	AAGUGUUUUUCUAAUAUCUUUUUCAAUUUUUGACAU
1459814	MMP1498	0.424777	0.142857	0.671093	2	UUAAACUCUUUUUUUAAACUCUUAAAUUUUUGACAC
1459746	MMP1499	0.254657	0.364216	1.17232	1	UAACAAAGGAAUCUACUCUUGAAAUAUUUUUAGAGA
1460329	MMP1500	0.799999	0.408962	0.33839	3	UAUUCUAACGAUUUUUCUUUUUUUAUAUUUUAGGUG
1462514	MMP1502	0.334385	0.0726573	0.717766	2	AAGAAAAUAAAUUUAUUCUUUUUUAUUUUAUGGAAA
1463485	MMP1504	0.434773	0.0634907	0.603546	1	CGACGAAUACGGUCUUUAAUUAAUAUUUUUUAAGGU
1464250	MMP1505	0.222219	0.222218	0.999999	0	CACGAUCGUUGCAAAUGCUACAGGAUGUCUUGAAGU
1465497	MMP1506	0.187496	0	0.812504	0	CUGCAAAGCUUGCAGAUGUAGAUGUUAUUGCAGCAU
1467116	MMP1508	0.173331	0.0912544	0.909681	0	AAAACUAUUAAACAAAGGAAGCUUAGAUUACGUCGA
1467356	MMP1509	0.654748	0.297598	0.49153	3	AAUCUAAAUUUUUCUCUUUUUUUAACUUUUAAACGA
1467414	MMP1510	0.613041	0.237318	0.507367	2	UUAUAAAUUUCUAGACUAUUUUUUACUUUUUUAAAU
1468879	MMP1511	0.853895	0.698687	0.484895	2	AAUCCAAUACUUUUUUGUUUAUUAUAUUUUUAAAAA
1470511	MMP1512	0.666642	0.416632	0.571437	2	CAAGAAUAUAUUUACAUUAAUUCUUUUUUUUAGCCU
1474526	MMP1515	0.771276	0.692355	0.743466	3	GUAAUUUUCAUUCCCUUCUUUUUUUAUUUUUAUAAA
1476293	MMP1516	0.63792	0.337833	0.546811	2	UAUUAAUUUCAAUGAAUAACUCUUUUUUUUUAGAAC
1476891	MMP1517	0.560962	0.449537	0.79758	0	AACUUCGAAAAUUUGACAUACGGCUGUCUGCAGACG
1477763	MMP1518	0.409829	0.379992	0.951876	3	UUAAUUUACCAAUAUUUUUUUUUAUUUUUUUAAUGA
1480379	MMP1520	0.391564	0.305554	0.876146	3	UAAUUAUAUAAACAUUGAUUUUAUUUUUUUUAAAUU
1481839	MMP1523	0.759418	0.649154	0.68572	1	UAAAUAAAAUAAUUUACCUACUUUAUUUUUUGGGGA
1485319	MMP1525	0.636355	0.428559	0.636365	2	CAAUAAUUAACUAUUUUUUUAAUUUAUUUUUGCAGA
1485997	MMP1527	0.635287	0.339621	0.552279	3	AUUAAUUUAAUUUUUAUUUUUUUCAAGUUUUAAAAG
1488856	MMP1530	0.337833	0.295771	0.940271	1	UUUCAAAGUAUCCUGAUUACUUAAAACUUUUAAUGG
1490236	MMP1532	0.472209	0.0285707	0.543314	2	ACUUACUAUUUUAUUAUUAAAAUAGUUUUUUCGGAC
1492989	MMP1534	0.765796	0.484057	0.453933	2	AUCUUAUUGAAUAACUCUUUUUUAAAUUUUUAAAAA
1495457	MMP1537	0.0624959	-0.285674	0.729193	0	UGAAGUAUAUCUAAAAAAGGCAUAAUUAAGGAAAAA
1495978	MMP1538	0.905659	0.72316	0.340778	1	ACUAAAUAUAAUUAAUUUCUACUAUUUUUUUGAAAA
1497424	MMP1540	0.167882	0.051282	0.877097	1	AAAAAAAUAAAAAAAAAUUAAAUUUGUUUUUCUGCA
1497384	MMP1541	0.738885	0.580107	0.621862	4	UUAAUUUUUUUUUAUUUUUUUUUAAUUUAUUAUAGA
1499904	MMP1543	0.123456	0.0938508	0.967329	0	AAACUAAUUACUCAAAAACACGAGCAGGUGUUAAAU
1501856	MMP1546	0.442558	0.449299	1.01224	0	CAAGAAGAAGAGUAGAAUUUAAAUACAAAGGCUUCA
1502265	MMP1547	0.621334	0.330907	0.565939	2	AUAAUUGGAAUCCAAAAUCUCUUUUUUUAUUUUUGG
1504497	MMP1550	0.679484	0.480516	0.616989	1	ACCUUUAAUAUCGAAUUACCAUUCCUUUUUUCCAAA
1504805	MMP1551	0.649119	0.46818	0.659773	1	AUUAACUUAAAAAACAAUUAUUACUUUUUUUAGUGU
1506932	MMP1553	0.451084	0.113207	0.61899	1	UAUGAAUUAAAUCCAUAAUUAAUAUUUUUUUGAAGA
1508110	MMP1554	0.681803	0.477872	0.609424	2	GAAAUCCUAUUUAAUUUUUUAAUUUUUUUAUAAUCA
1511089	MMP1555	0.183671	0.0549446	0.863789	0	UCCCACAUAGGUAUUUAAAAGCAGAAACUACCGAAA
1513045	MMP1558	0.189393	0.0523555	0.855392	0	GAAGACCCUAAAGAAAAGUACACAAAAUUCUAUACC
1514668	MMP1559	0.687311	0.671167	0.950904	1	AAGGGAGCCACUUGGCUUCCUUUUUUUAUACUUAUU
1516691	MMP1561	0.194027	0.019802	0.822255	0	CACAAUUUGUUCCGUCAUUAGCUAUGCUCAUUGGUG
1517356	MMP1562	0.383231	0.232455	0.80356	0	GUACCAGAAUUGCCUAAGAAAGAGUAAGGUGGUAUA
1519358	MMP1565	0.158877	0.129629	0.966395	0	CCGGUAAAAAGGCAGGAAGAGACGUAGGUAUUGCCU
1519479	MMP1566	0.171872	0.0404038	0.862996	0	CAGAGGUGGAAUAAUGUUUAGAUUUGACAAAGAACA
1520446	MMP1567	0.852702	0.660381	0.433715	2	AUUUAAUUAAUUUGUUUCUUCUUUUAUUUUUAGAAA
1520491	MMP1568	0.508284	0.204419	0.618058	3	UUCAGGAUAACUAACUUUUUUUAUUUUUUUUAUAUG
1523387	MMP1573	0.583309	0.129869	0.478883	2	UUUUUAAACUUUCUAAAUUUUUUCUUAUUUCGUAAA
1526296	MMP1576	0.142	0.0866262	0.939375	1	AUUUAAAAAAGAAAAAUUAUUUAAGAAUUUUACCCA
1526092	MMP1577	0.958155	0.926538	0.569615	0	UGUAUUUAUCAUAAUUUCACCUGUUGUUAGCUAUUA
1529171	MMP1579	0.856641	0.594606	0.353629	2	AUCGAAUUAAUUUCUUUUUUUAUUCUUUUUUGAAAA
1533589	MMP1582	0.258056	0.202896	0.930799	0	AAAAAGCAUAAAUCUCAAAAACGCUAAAAGAGGCGA
1534084	MMP1583	0.660547	0.650907	0.972383	0	AGAAUACCAAGAAAUUCAAGUUCUUGACACUUACGA
1534831	MMP1584	0.887542	0.688653	0.361199	2	AGAAUAAUUUCUAACUUUUUUAUUAUUUUUUGGUGA
1536059	MMP1586	0.770731	0.570306	0.533564	2	GAAUUUAAUUAAAAUUUUUUUAUUCUAUUUUAACUG
1536483	MMP1588	0.895154	0.398988	0.174449	3	AAACAUCUAAUUUAAUUUUUUUUAAUUUUUCGGGGG
1539381	MMP1589	0.718744	0.373734	0.449099	2	UAAGACUAUUAAAAAUAUAAUUUUUAGUUUUACAGU
1540235	MMP1590	0.333327	0.216213	0.85058	2	UUGAAACAGAAACCCCAUCUUUUUUCAUUUUGUUUA
1541172	MMP1592	0.568956	0.288131	0.60551	3	AAAUUUUUUUAUUUUUGAAAUUUCAUCUUUUGGGGU
1543167	MMP1594	0.388867	0.171426	0.737572	0	UAUCUUAUAAAAAGAUUAUAGCAAUGGUUGAUGAAG
1543763	MMP1595	0.499975	0.397845	0.830393	1	AAAUUUUAAAUAUUCGACCAAGUGAAACUAUGGCAG
1548000	MMP1599	0.512189	0.343431	0.74297	2	AAUUAAAAAUAACUUUUUUAAAAUUUAUUUUAGGUA
1549695	MMP1602	0.370357	0.187049	0.774515	2	UUUGAAUAACUAUUUUUAUGCUUUUUUUCUUAAGAU
1551357	MMP1604	0.648643	0.464133	0.65568	3	UUUUAAAUUCUUCUUUUUCAAUUCGUUUUUUAAGUU
1556013	MMP1608	0.739897	0.478046	0.498326	2	GCCAUUUUAAGCUCUUUACUAUUGUUGUUUUAUAUG
1557185	MMP1609	0.853055	0.634703	0.402262	3	UUCUAAUUCUUUUUAACUACUUUUAUUUUUUACAUA
1557994	MMP1610	0.188234	0.0714285	0.87421	1	UGCAUUCCUUGCUCCUGCAUCUGCACUUUUUCUAUG
1557880	MMP1611	0.198196	0.0635591	0.856225	2	UUUAUUUUAAAAUCUUAAACCCUGUUCUUUUAAAAA
1559773	MMP1613	0.327583	0.25287	0.9	3	AAUUCUUUUUAAAUAAUUUUUAAAAUAUUUUAUUAA
1561101	MMP1615	0.495625	0.344185	0.769081	2	CCAAUCGAAAAACAAUAAUUUUUACUUUUUUCAUUU
1563003	MMP1617	0.499964	0.31248	0.727304	3	UGGUAAAUUUUAAAUCUAUUUUUAUUUUUUUAAAGA
1565651	MMP1619	0.258062	0.154638	0.877657	1	UAUGAAUUAUCUGUUAAUUCUUCUAUUUUUUACAAU
1565914	MMP1621	0.672039	0.394283	0.541442	4	CUUUUUUGAAUUUUAAUUUUUAAUUAAUUUUAAGAU
1566872	MMP1622	0.272715	0.166662	0.872738	1	UGAUUGGAAUUCCAUUAAUAGCUUUUGCAAUUUCUA
1569596	MMP1626	0.242417	0.15254	0.893945	1	UGACUUUAAAUUUGAAUUUUGUGGCCAUUAUCGGCG
1570276	MMP1627	0.297289	0.287034	0.985616	0	AUAUCGUUCCAAACUUGAUAACGGCAGUUCUGUUCG
1570617	MMP1628	0.299994	0.186914	0.860925	3	AUUUUUAAUCCUGUCUUUAUUUUUAAUUUUUAGAGU
1572039	MMP1629	0.360757	0.408161	1.0801	0	AUGGAAUUUAUAACUUCGGAGCCCACGGCAUAGAAA
1574563	MMP1630	0.410522	0.0823524	0.64238	1	AAGCAUUAUCAUUAUUUCAAAUACUUUUUUUGAACU
1575888	MMP1632	0.563824	0.489791	0.854897	3	GGCAUUACUGAUCUUUUAAUUUUUCUUUUUUGAAAC
1575897	MMP1633	0.627267	0.480616	0.717645	2	UUUAAAAUAACUCUCUAAAUUUUAUUUUUUUAGAGU
1577183	MMP1635	0.746909	0.40476	0.425192	3	UUUAUAUUUUAUUUAAUUUUAAUUCACUUUUAAAAA
1578934	MMP1636	0.145831	0.0422529	0.891853	2	UAAUUAUUUAAUUUUAAUUCCAUUUUUCCUUGAAGU
1578879	MMP1637	0.162158	0.263153	1.13706	2	UAAUUAAUUUUGAUUUCUGAUAUUUUUUCUUGCAAG
1582061	MMP1639	0.259995	0.0416646	0.772178	0	AGAACACCAAUUGAUGAAAUUCCUGUAGAAAUCGUA
1583249	MMP1640	0.374764	0.173911	0.756863	2	UUAAACUAUUUUUUUCAUUCAUGUAAUUUUUAACUA
1584726	MMP1642	0.168537	0.149484	0.977598	0	AACAAGCAGUCCUGUACCUAUUGAAGAAUACGUAGA
1585097	MMP1643	0.264411	0.290135	1.03624	0	UGACUGAUGAUAUCCACGUAAUGGAAGUUCUCGGAA
1585927	MMP1644	0.692767	0.239616	0.40405	2	UUUACAGAAAACCCUCAAUAAUCUUUUUUUUGGUGU
1586648	MMP1646	0.281345	0.0827337	0.783475	1	AGGGCGUUGUAUAUAUUUCUUUUUUUAUUUCCAUUG
1588760	MMP1647	0.428186	0.210598	0.724363	3	AACUACUAUUUUUUCAACUUAUUUUUAUUUUAAAUU
1590043	MMP1648	0.347821	0.259374	0.880578	2	UACACAUAAAUUUUUAUUUUCUUCAAUUUCUAAAGC
1592663	MMP1652	0.742836	0.153835	0.303917	3	UUAAAAUCCCUUAUUUUUUUUCGCAUUUUUUAAUUU
1597216	MMP1653	0.583285	0.0714259	0.448769	0	GUCUGAUAAUUAUAAAGAUAAAACAGAAGCUGCAAA
1600243	MMP1655	0.333326	0.116276	0.754392	2	UAUUAAUUUAUCUUUUUUCCACAAAAUUUUUCAAAA
1600188	MMP1656	0.346932	0.169228	0.786099	2	UUAAUAAUUCGUAUUCAUUUUUCUUUUUUUAAUGAG
1602869	MMP1658	0.752855	0.531335	0.527338	3	UAAAAAAAUUAAAAUUUUAUUUUUCAAUUUUCAAAG
1603432	MMP1659	0.317643	0.259254	0.921176	1	AUUAAAUUAUUAUUCUUAUUUAACCUAUUUUAAAAU
1605132	MMP1661	0.359997	0.180449	0.780919	3	GUUUUUGUAAUCCCUUCGCCUUUUACUUUUUCAGAU
1604963	MMP1662	0.274334	0.0647475	0.775904	2	AAGUUCUUCUAUUUUUUCCAUUAAAAUUUUUAAAUC
1607987	MMP1664	0.479981	-0.149992	0.452194	1	UAAAAAAUUAAAAUAAUAUAACUAUCUUUUUGGCUC
1613998	MMP1671	0.624974	0.600499	0.938735	0	UACAUGUACAGUACUGUAGACCUAACGUCUGCAAAA
1620717	MMP1678	0.169011	0.033112	0.859447	1	UAUUUUCCAGAUACUCCCUCUGGGUGGCAUAAAAGG
1620571	MMP1679	0.366409	0.251798	0.846817	1	UAAUGAUUAUAACUCUUCAUAAUUCUUUUUUAAAAU
1622893	MMP1681	0.408837	0.414411	1.00952	1	AAGCCCUCGCGGCUUAUCUACAUCUCUUUUUAAAUC
1626481	MMP1683	0.394492	0.0949718	0.669049	2	CAAAUCAUGUAUCUCUAAAUUUUUAGUUUUUGUAUC
1626372	MMP1684	0.0937481	0.0535707	0.957548	1	CUUUUUUAUAAAUGAUCUCAUAUCCAAAUAGUAAAA
1627084	MMP1685	0.205217	0.0717948	0.856258	1	AACAGAUUUACAUAACCGCAUAAUUAAUUUUGAUAA
1629279	MMP1687	0.166662	0.0740732	0.900004	0	AACAAAAUUGACUAAAAUCAAUUACGAUUAUGAAAA
1629943	MMP1688	0.337658	0.166665	0.794809	2	AAAUAACUUUUUUAUUUAUUAUUUUUUUAUUGCGUU
1629895	MMP1689	0.365587	0.078651	0.688569	2	AAAAAAGUUAUUUUCCCAAAAAUUUAUUUUUAAAGU
1631279	MMP1691	0.747197	0.629708	0.682713	1	CUUUCAACAAAAAUCUCUUUUUAAAUUAUUUAUUUC
1632687	MMP1692	0.612793	0.42941	0.678609	2	AUCAUUGAAAUAAACCAUUCCCAUUUUUUUUGGGUG
1633906	MMP1693	0.701009	0.415093	0.511177	1	AUAGAAGGCCCCAUACCUUUAAAAAUUUUUUCGGGG
1634090	MMP1694	0.610758	0.559658	0.883954	0	AAAGAUGGUAGACGAGGCAAAAUUAAAUUUAAUCGA
1635371	MMP1695	0.210083	0.0808815	0.859429	0	GGAUGGUGACUCUAUGGGUAAGGUUACUAUCGAACC
1636270	MMP1696	0.189943	0.0285717	0.833882	0	UUAAAUGGCAGAUAAAGUUAAGGUAGGCAUUAUACA
1636858	MMP1697	0.923352	0.901135	0.775282	0	CAUGUGACGAACAACCCGAAGGCUAAGGCCAGGGGA
1640389	MMP1698	0.163841	0.132128	0.963458	1	AAGUACAGAAAAACAUUUUAGAUUUGGGUAUCUCGG
1640875	MMP1699	0.241371	0.212761	0.963659	0	CCCAUUCGUUAUGGCAAUGAGCUACGGUGCUACAUU
1642345	MMP1700	0.574876	0.314283	0.619969	3	AAUUUAAUUCUUUUUUCGUUUUUUAUUUUUCAGCUA
1644188	MMP1702	0.940531	0.892916	0.555352	1	UUCGGGGUUCGAUUCCCCCCCUGCGCCGUUUUAUAU
1645137	MMP1703	0.120141	-0.00295873	0.877263	2	UUGUUUUUUAACAAUUUCAUAUGCUUUUUUUAAGUC
1645076	MMP1704	0.297958	0.184339	0.860704	3	AUUUAAUUAACAUCUUUUAUUUUCGCAUUUUUGAAC
1646301	MMP1707	0.324071	0.22262	0.869497	0	GCAACGAAAAAUCCGUUACAGUGAAACCUCCAAGAU
1647294	MMP1708	0.611111	0.290289	0.547955	2	AGUAUUACAAUAACUCUUUUUAUUCUUUUUUAAACG
1647691	MMP1710	0.172077	0.167992	0.99509	0	AAGAAAAGCUAGUGAACUGAAAUGGGGUCAAAGACA
1648366	MMP1711	0.202245	0	0.797755	1	ACCAAGAAUUGAAUCCUAAAUUUAUUUUUUUAUUAU
1649171	MMP1712	0.333325	0.207544	0.841276	1	UGAAUCACUUAAAAAACCAUAUAUAUUUUUUGUAUA
1651167	MMP1714	0.689074	0.818574	1.71379	2	CUGUAUUCAUACACACUUUUUUUAUUUUUUUAAAAG
1653225	MMP1717	0.584895	0.473279	0.788093	2	GACUGCCUUAUUAUUUUUCGUUUAUUUUUUUAAAAA
1659665	MMP1720	0.224994	0.0540524	0.81929	0	UUUGAAGAUAGCCCCCAUACGUUAAAUUCUUACCUU
1660301	MMP1721	0.861311	0.558279	0.313975	2	GAAUUUUAAAAAAUCAAUUUAUUACUUUUUUGGUGA
