# Supplementary material for: aCPSF1 cooperates with terminator U-tract to dictate archaeal transcription termination efficacy
Source: eLife. 2021 Dec 29;10:e70464. doi: 10.7554/eLife.70464 (PMC8716108; doi:10.7554/eLife.70464)
Supplement: Supplementary file 3. [file elife-70464-supp3.xlsx]

## Sheet: nocoding_infor
Datasheet S3. Term-seq identified TTSs, TTEs, and TRQQs of noncoding RNAs in M. maripaludis S2 and ▽aCPSF1, respectively
Upstream Gene: gene upstream the identified TTS .
Number of TTS: identified TTS numbers in each gene, including the primary and secondary TTSs defined by the algorithm described in Methods.
Position: nuclotide of the identified TTS of noncoding RNA.
S2_head.reads and ▽aCPSF1_head.reads: the Term-seq reads of TTS in strains S2 and ▽aCPSF1, respectively.
S2_TTE and ▽aCPSF1_TTE: calculated transcription termination efficiency (TTE) of a gene in the wild type strains S2 and ▽aCPSF1 mutant, respectively;
TQRR: the TTS Quadruplet Read Ratio (TQRR) of a gene in strain S2 to that in ▽aCPSF1 mutant;
Sequence -30 to +5: sequence of the RNA fragment from 30 nt upstream to 5 nt downstream of the identified TTS
pos	strand	upstream.gene	annotation	TTS categories	start.codon	stop.codon	S2_head.reads	S2_TTE	DCL_head.reads	DCL_TTE	TQRR	sequence_30_5
59	-	RNA_46	5S rRNA	Primary	185	66	1452	0.113579	72533	0.838409	5.4856	GAACAAUGUGACGCUGUUAGUCACUUUUUAUUUUGG
5100	-	RNA_47	5S rRNA	Primary	5226	5107	1430	0.111465	72968	0.836249	5.42613	GAACAAUGUGACGCUGUUAGUCACUUUUUAUUUUGG
36773	-	RNA_45	RNase P RNA	Primary	37064	36817	76	0.407406	94	0.0987012	0.657489	AAAAUUUUAAACAUUUUCAAAAUAAUUUUUUAACCU
82175	-	RNA_35	tRNA-Thr	Primary	82258	82185	0	0	13	0.22222	1.28571	GUUCAAACCCCGCCUGAAGCUCGUUUUUUAUUUUGG
82647	+	RNA_1	tRNA-Gln	Primary	82518	82593	70	0.707478	-4	-0.218744	0.240019	UAUAAAUUUAGAUAUGCCAUUUUAAUUUUUUAAAAA
113508	+	RNA_6	tRNA-Asp	Primary	113418	113492	507	0.383442	118	0.153787	0.728608	AUCCCGGCCAGAGCGCCUUAUUUCUAUUUUCAAUAC
113614	+	RNA_7	tRNA-Lys	Primary	113526	113599	186	0.276428	33	0.078454	0.785172	AAUCCCUUCGGGCCCGCUCAAAAUUUACUUUCACAU
113704	+	RNA_8	tRNA-Asp	Primary	113620	113694	289	0.376483	237	0.285452	0.872604	GUUCAAAUCCCGGCCAGAGCGCUUUUUUAAUAAUAA
113707	+	RNA_8	tRNA-Asp	Secondary	113620	113694	81	0.209342	48	0.112676	0.891058	CAAAUCCCGGCCAGAGCGCUUUUUUAAUAAUAAUUA
162063	+	MMP0151	sRNA_1	Primary	161895	162063	27	0.462066	57	0.116315	0.60874	UUUAUAUGCAUUCUCAUUUUACACGAUUUUUCAAAA
163717	+	MMP0152	sRNA_2	Primary	163586	163717	584	0.845502	844	0.661599	0.456553	UUGGGAAAAUUUUCUAUUUUAAAAAUUUUUUAAAAA
197732	+	RNA_9	tRNA-Leu	Primary	197613	197697	71	0.389066	21	0.0798963	0.663983	UUGAAAUAACGCACUCUUUUUUGGUUUCUUUCAAGA
212146	-	MMP0209	sRNA_3	Primary	212279	212146	201	0.521821	530	0.517399	0.990839	UUAACCCAAAAACCAUUUAAUUUCUUUUUUUAUUGU
263047	-	MMP0266	sRNA_4	Primary	263250	263047	6	0.29999	3	0.171423	0.844834	UUUUUAAUAAUCGCCUUACUUUCUCUUUUUUAAUCG
263696	+	MMP0255	sRNA_5	Primary	263453	263696	32	0.929808	35	0.671224	0.213494	UAGAUUAAUUAUUCUAAAAUUACUCUUUUUUAGUGA
299145	-	MMP0303	sRNA_6	Primary	299277	299145	384	0.704834	187	0.605008	0.747272	UUCCUUAUUCAAAACUUUUAACUUAUUUUUUGUAUC
335576	+	RNA_10	tRNA-Arg	Primary	335487	335564	545	0.367302	112	0.189806	0.780922	AAUCCCUCCGGGUCCGCCAUUACUACUUUUCAAGAU
335583	+	RNA_10	tRNA-Arg	Secondary	335487	335564	293	0.3429	147	0.244103	0.869299	CCGGGUCCGCCAUUACUACUUUUCAAGAUUUAUGCA
335677	+	RNA_11	tRNA-Glu	Primary	335592	335666	156	0.70242	71	0.488686	0.581991	UUCAAAUCCCGGCUGGAGCACUUUUUUUAAUAUUGG
335731	+	RNA_11	tRNA-Glu	Secondary	335592	335666	6	0.333321	0	0	0.666679	UUAAAUUUAUAAGUUAUAUAUAAAUCCUUUUCGACA
339328	+	RNA_12	tRNA-Val	Primary	339245	339321	15	0.315064	33	0.469995	1.29232	GUUCGAAUCUCCCCGGACUCACCAUUUUUAUUUUAG
339404	+	RNA_12	tRNA-Val	Secondary	339245	339321	7	0.399984	-1	0.0652161	0.641877	ACUCUAUUUAAAUAUUGAAAAACCUUUUUUUAAUAU
339410	+	RNA_12	tRNA-Val	Secondary	339245	339321	7	0.59996	1	0	0.40004	UUUAAAUAUUGAAAAACCUUUUUUUAAUAUCAAACU
372775	-	MMP0376	sRNA_7	Primary	372944	372775	2	0.217382	3	0.0246909	0.802431	UUCUAGAUAAUUUAAAAGAUUGUGAUUUUUUACGAA
383715	-	RNA_34	tRNA-Met	Primary	383800	383722	0	0	21	0.111764	1.12583	GUUCAAAUCUUCUCCUCGCUACCAUUUUUUUAAAAG
451927	-	MMP0461	sRNA_8	Primary	452175	451927	5	0.172408	-4	-0.045977	0.791214	AUGAUUAAGAAAUAUUAAAAUUUAUAUUUUUAAAUA
454180	+	RNA_13	tRNA-Ser	Secondary	454031	454115	23	0.224136	15	0.106382	0.868228	CAAGACCCGUUAUAACUUCAUAGUUUAUUUUGAUGU
454284	+	RNA_13	tRNA-Ser	Primary	454031	454115	32	0.542162	1	0.0680266	0.491256	UCGAAAAACGGCUAGUUUAUCCUUAUUUUUUAGUCC
454855	-	MMP0461	sRNA_9	Primary	454984	454855	188	0.709258	11	0.0238093	0.297833	GGGGAUUGUUGAAUUGUUCCAGAUCUCUUUUUAAUC
455049	-	MMP0461	sRNA_10	Primary	455251	455049	5	0.307669	2	0.015873	0.703498	AGAAAAAUUAAAAUCAUUUAAGUUCUUUUUUAACCC
455503	+	MMP0459	sRNA_11	Primary	455398	455503	2110	0.526539	9242	0.520179	0.986745	UAACAUACUGCAUCAGGUUUAUUCCAUUUUAAAAUU
473414	+	MMP0474	sRNA_12	Primary	473197	473414	423	0.895433	120	0.662067	0.30943	AGUUUUCUAAAAAUUUCUUUUUUCCUUUUUUAACCC
473601	+	MMP0474	sRNA_13	Primary	473479	473601	670	0.322314	155	0.212322	0.860359	UAUGAAUUGUUCUAUAUCCUUAACUUUUUUUAGAUU
478487	+	MMP0480	sRNA_14	Primary	478368	478487	83	0.918173	46	0.568622	0.189686	UUGAAUUGUUCUUUCUAUUUUAACUUUUUUUAGAGU
495845	+	MMP0487	sRNA_15	Primary	495736	495845	10	0.454532	1	0.133324	0.62938	AAAUUUUGAAAAAUUACAUAACUAAUUUUUUAACGU
573467	+	MMP0573	sRNA_16	Primary	573315	573467	990	0.461057	139	0.253658	0.722113	AUAGAAAUUCUCCCCAAAAAAACUUUUUUUUAUUAA
643704	-	MMP0653	sRNA_17	Primary	643872	643704	37	0.551015	49	0.553842	1.00634	UUCAAAAAAUGCUUAAUUUUUUUCUAUUUUUAAAAA
700188	+	RNA_14	tRNA-Arg	Secondary	700097	700170	8	0.13793	0	0.0188672	0.878648	CCCGAUGGGGGCGUUUAAUUAUAUUAUUUUUAAAAU
700208	+	RNA_14	tRNA-Arg	Primary	700097	700170	26	0.636354	1	0.0408152	0.37912	AUAUUAUUUUUAAAAUAAAGUUUACAUUUUUCAAAU
731668	+	MMP0737	sRNA_18	Primary	731441	731668	3	0.666556	1	0.0999902	0.37049	UAAUAAUCAUGAACUUUUUUUGAACUUUUUUAAAAA
755775	+	MMP0763	sRNA_19	Primary	755672	755775	1864	0.714821	1375	0.492707	0.562159	UCACCUUGAAUAUCAGUGUUUCCACUACUUUGGAAA
851824	-	MMP0865	sRNA_20	Primary	851942	851824	92	0.701147	65	0.538133	0.647055	ACACCAAACUUUUACUUUUUUAACUCUUUUUGGCCU
1134228	-	MMP1146	sRNA_21	Primary	1314342	1134228	0	0.142837	0	0	0.857163	AGUUCUGCAUCCGCUUUUUUUAUUAUUUUUUAAAAG
1187869	-	MMP1201	sRNA_22	Primary	1188005	1187869	11	0.150683	-10	-0.545442	0.549563	UACUAAUUUUUCUGUAUUUUUAUUAUUUUUUAAAAA
1263718	+	RNA_15	tRNA-Arg	Primary	1263591	1263665	658	0.727049	138	0.372092	0.4347	UAGGAAGUAUCUACACUUUUUUAAAAUUAUUAUUAA
1263721	+	RNA_15	tRNA-Arg	Secondary	1263591	1263665	77	0.327326	16	0.095679	0.743844	GAAGUAUCUACACUUUUUUAAAAUUAUUAUUAAAAA
1263729	+	RNA_15	tRNA-Arg	Secondary	1263591	1263665	53	0.407033	-3	0.0121954	0.600288	UACACUUUUUUAAAAUUAUUAUUAAAAAAUUUAAAA
1263748	+	RNA_15	tRNA-Arg	Secondary	1263591	1263665	46	0.717384	63	0.364484	0.444704	UAUUAAAAAAUUUAAAAGAUUACCAUUUUUUAAAGA
1268892	-	RNA_30	tRNA-Gly	Secondary	1269029	1268957	7	0.249994	0	-0.0208332	0.7347	AGAUUAAUAAAUGAUAUGGUCUUAUAUAUUUCUAAA
1268945	-	RNA_30	tRNA-Gly	Secondary	1269029	1268957	40	0.299998	174	0.496168	1.38935	UCAAAUCCCGACUGGCGCACCUUUUUAUUUUAGGCA
1268948	-	RNA_30	tRNA-Gly	Primary	1269029	1268957	212	0.61123	335	0.489736	0.7619	GGUUCAAAUCCCGACUGGCGCACCUUUUUAUUUUAG
1269036	-	RNA_29	tRNA-Gly	Primary	1269120	1269048	92	0.161364	99	0.155447	0.992995	UCAAAUCCCGGAGGCCGCAUCUCUACAGUUAGAACG
1305276	-	RNA_28	tRNA-Cys	Primary	1305357	1305284	3	0.199994	31	0.342854	1.2174	GGGUUCAAAUCCCUUCCUUGGCUUUUUUUAUUUUAG
1305857	+	RNA_16	tRNA-Ser	Secondary	1305759	1305846	16	0.131249	3	0.00454525	0.872718	AAAUCCCCCUCUCUGCGCCAUUUAUUUUUUUAUUAC
1305859	+	RNA_16	tRNA-Ser	Primary	1305759	1305846	2	0.0583937	-5	-0.0601846	0.888153	AUCCCCCUCUCUGCGCCAUUUAUUUUUUUAUUACUA
1461977	+	RNA_49	SRP RNA	Secondary	1461664	1461970	3677	0.305571	110635	0.907395	7.4988	UUUCACCCACCUCAAGGAAGCCACUUUUUAUUUUAA
1461979	+	RNA_49	SRP RNA	Primary	1461664	1461970	4626	0.630628	9003	0.887265	3.27646	UCACCCACCUCAAGGAAGCCACUUUUUAUUUUAAAA
1461986	+	RNA_49	SRP RNA	Secondary	1461664	1461970	2382	0.820823	70	0.559346	0.406616	CCUCAAGGAAGCCACUUUUUAUUUUAAAAGAUUUUU
1462009	+	RNA_49	SRP RNA	Secondary	1461664	1461970	70	0.166667	2	0.0320507	0.860927	UUAAAAGAUUUUUAUAAUUAAAUAAAUUUUUCAAGU
1462019	+	RNA_49	SRP RNA	Secondary	1461664	1461970	185	0.795335	18	0.282441	0.285224	UUUAUAAUUAAAUAAAUUUUUCAAGUUUUUUAAGGU
1462024	+	RNA_49	SRP RNA	Secondary	1461664	1461970	22	0.675667	1	0.065217	0.346961	AAUUAAAUAAAUUUUUCAAGUUUUUUAAGGUUAAAU
1497967	+	RNA_18	tRNA-Ile	Primary	1497882	1497956	303	0.826575	147	0.541236	0.378027	UUCGAAUCCCCGCUGCCCUACUUUUUUCUAUUUUAG
1497970	+	RNA_18	tRNA-Ile	Secondary	1497882	1497956	34	0.506487	62	0.460672	0.915051	GAAUCCCCGCUGCCCUACUUUUUUCUAUUUUAGGAA
1507711	-	RNA_26	tRNA-Leu	Secondary	1507810	1507726	6	0.216211	0	0.0196078	0.799465	AAUCCCUUCCCUCGCAUAUUUUUUUAAAACAAAUUA
1507714	-	RNA_26	tRNA-Leu	Primary	1507810	1507726	29	0.537493	6	0.163932	0.553193	UCGAAUCCCUUCCCUCGCAUAUUUUUUUAAAACAAA
1507716	-	RNA_26	tRNA-Leu	Secondary	1507810	1507726	10	0.252523	2	0.130433	0.859598	GUUCGAAUCCCUUCCCUCGCAUAUUUUUUUAAAACA
1507717	-	RNA_26	tRNA-Leu	Secondary	1507810	1507726	9	0.191917	6	0.11594	0.914059	GGUUCGAAUCCCUUCCCUCGCAUAUUUUUUUAAAAC
1508062	+	RNA_19	tRNA-Met	Primary	1507940	1508054	222	0.665235	115	0.405639	0.563236	GGGUUCAAGUCCCCCCCUCGGCAUUUUUCUUUUUGG
1508065	+	RNA_19	tRNA-Met	Secondary	1507940	1508054	93	0.685893	112	0.503648	0.632831	UUCAAGUCCCCCCCUCGGCAUUUUUCUUUUUGGGUA
1600887	-	RNA_25	tRNA-His	Secondary	1600972	1600898	10	0.424229	29	0.327583	0.85627	GAUUCCCGGUCUCGGCCCCAUUUUUUAUUUUAGGAA
1600890	-	RNA_25	tRNA-His	Primary	1600972	1600898	45	0.648929	106	0.532256	0.750561	UUCGAUUCCCGGUCUCGGCCCCAUUUUUUAUUUUAG
1601182	-	RNA_22	tRNA-Met	Primary	1601263	1601189	31	0.297028	28	0.199999	0.878714	UGGGUUCAAAUCCCAUCGGGCCCAUAUAUUUGAAAC
1601575	+	RNA_20	tRNA-Phe	Secondary	1601495	1601568	49	0.268929	37	0.184728	0.896721	GGUGUUCGAAUCACCCCCUUGGCACGUUUUUAUUUU
1601577	+	RNA_20	tRNA-Phe	Primary	1601495	1601568	143	0.586317	105	0.406779	0.697349	UGUUCGAAUCACCCCCUUGGCACGUUUUUAUUUUGG
1601580	+	RNA_20	tRNA-Phe	Secondary	1601495	1601568	37	0.37795	50	0.266665	0.848249	UCGAAUCACCCCCUUGGCACGUUUUUAUUUUGGGCA
1627499	-	RNA_43	tRNA-Trp	Primary	1627676	1627513	355	0.847764	60	0.420288	0.262606	AAAUCCCAGUACUUCCACUUUUUUUCUUUUAAAAAA
1639568	+	MMP1698	sRNA_23	Primary	1639306	1639568	26	0.864841	3335	0.726749	0.494632	AUCUCUUACCCCUCCAUUUUUUUAUAUUUUUAAAAA
1644197	+	RNA_50	tRNA-Sec	Primary	1644096	1644185	73	0.610712	4	0.0341878	0.403068	CGAUUCCCCCCCUGCGCCGUUUUAUAUUUUUGGUGG
